# Supplementary material for: Electrochemical nickel-catalyzed cross-coupling of glycosyl thiols with preactivated phenols and ketones
Source: Royal Society of Chemistry journal article supplement (doi:10.1039/d4ob00442f), 2024-01-01

## Supporting Information

### Electrochemical Nickel-Catalyzed Cross-Coupling of Glycosyl Thiols with Preactivated Phenols and Ketones

Fuxin Li,<sup>†a</sup> Hui Liu,<sup>†a</sup> Wanyu Xing,<sup>a</sup> Qingju Zhang<sup>a</sup> and Liming Wang<sup>\*a</sup>

<sup>a</sup>National Research Centre for Carbohydrate Synthesis, Jiangxi Normal University, 99 Ziyang Avenue, Nanchang, 330022, China.

#### Table of Contents

|                                                                    |     |
|--------------------------------------------------------------------|-----|
| 1. The general information and general procedure-----              | S2  |
| 2. The structures of substrates used in article-----               | S3  |
| 3. The table of condition optimization for the model reaction----- | S4  |
| 4. The experimental procedures and characterization data-----      | S5  |
| 5. The references -----                                            | S22 |
| 6. NMR spectra-----                                                | S23 |

### General Information

Commercial reagents were used without further purification unless otherwise indicated. Reactions were monitored by TLC analysis with detection by UV (254 nm) and where applicable by spraying with 20% sulfuric acid in EtOH or with a solution of  $(\text{NH}_4)_6\text{Mo}_7\text{O}_{24}\cdot 4\text{H}_2\text{O}$  (25 g/L) and  $(\text{NH}_4)_4\text{Ce}(\text{SO}_4)_4\cdot 2\text{H}_2\text{O}$  (10 g/L) in 10% sulfuric acid (aq.) followed by charring at  $\sim 150$  °C. Flash column chromatography was performed on silica gel (300-400 mesh).  $^1\text{H}$  and  $^{13}\text{C}$  spectra were recorded on a Bruker AV 400 in  $\text{CDCl}_3$ . Chemical shifts ( $\delta$ ) are given in ppm relative to tetramethyl silane as internal standard ( $^1\text{H}$  NMR in  $\text{CDCl}_3$  or  $\text{CD}_3\text{OD}$ ) or the residual signal of the deuterated solvent. Coupling constants ( $J$ ) are given in Hz. All  $^{13}\text{C}$  spectra are proton decoupled. Where applicable COSY, HSQC, NOESY, HMBC experiments were used to further elucidate the structure. Structural assignments were made with additional information from COSY, HSQC, and HMBC experiments.

### General Procedure:

**Solution A:** A Schlenk tube with stir bar charged with Ni catalyst (0.3 mmol) and dtbbpy (0.3 mmol) were dissolved in 1 mL of DMF under  $\text{N}_2$ . The solution was stirred for 1 h at 60°C before usage.

**Solution B:** A Schlenk tube with stir bar charged with LiBr (1 mmol) were dissolved in 2.5 mL of DMF under  $\text{N}_2$ . The solution was stirred for 1 h at rt before usage.

In an oven-dried undivided three-necked bottle (5 mL) equipped with a stir bar with thio-sugar (0.3 mmol, 1 eq). The bottle was equipped with Ni electrode (15 mm $\times$ 15 mm $\times$ 1 mm) and Mg electrode (15 mm $\times$ 15 mm $\times$ 0.3 mm). Aryl halide (0.3 mmol, 1 eq), 1 mL of **Solution A** and 2 mL of **Solution B** was added under nitrogen atmosphere. The reaction mixture was electrolyzed under a constant current of 8 mA for 3 h at rt. After completion of the reaction, aqueous solution was extracted with EA (3  $\times$  15 mL) and the combined extracts were dried with anhydrous  $\text{Na}_2\text{SO}_4$ . The solvent was removed under reduced pressure by rotary evaporation. Then, the pure product was obtained by flash column chromatography on silica gel (eluent: EA / PE = 1:5).

**Scheme S1.** The substrates structures used in article

**Thio-sugars:**

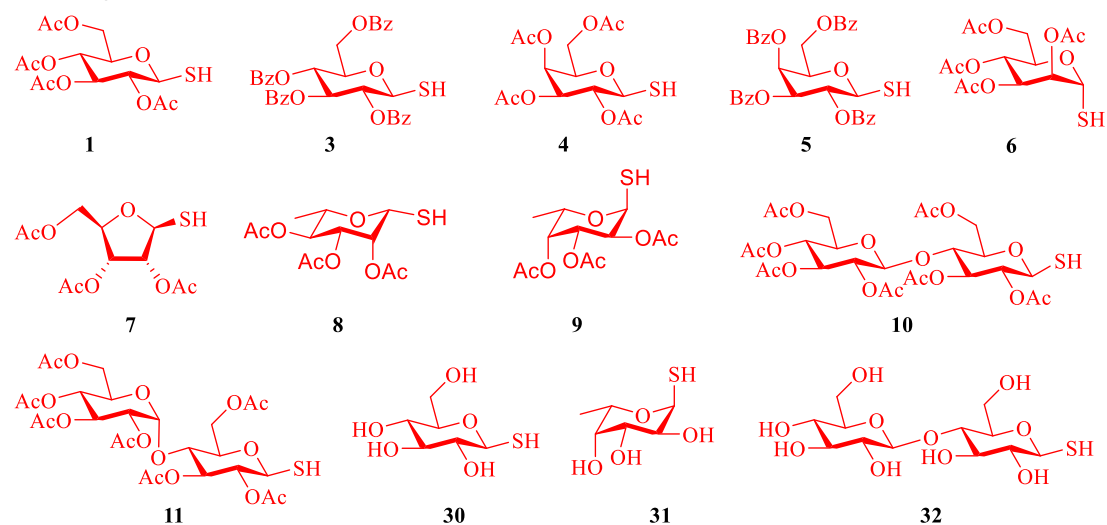

**Preactivated Phenols and Ketones:**

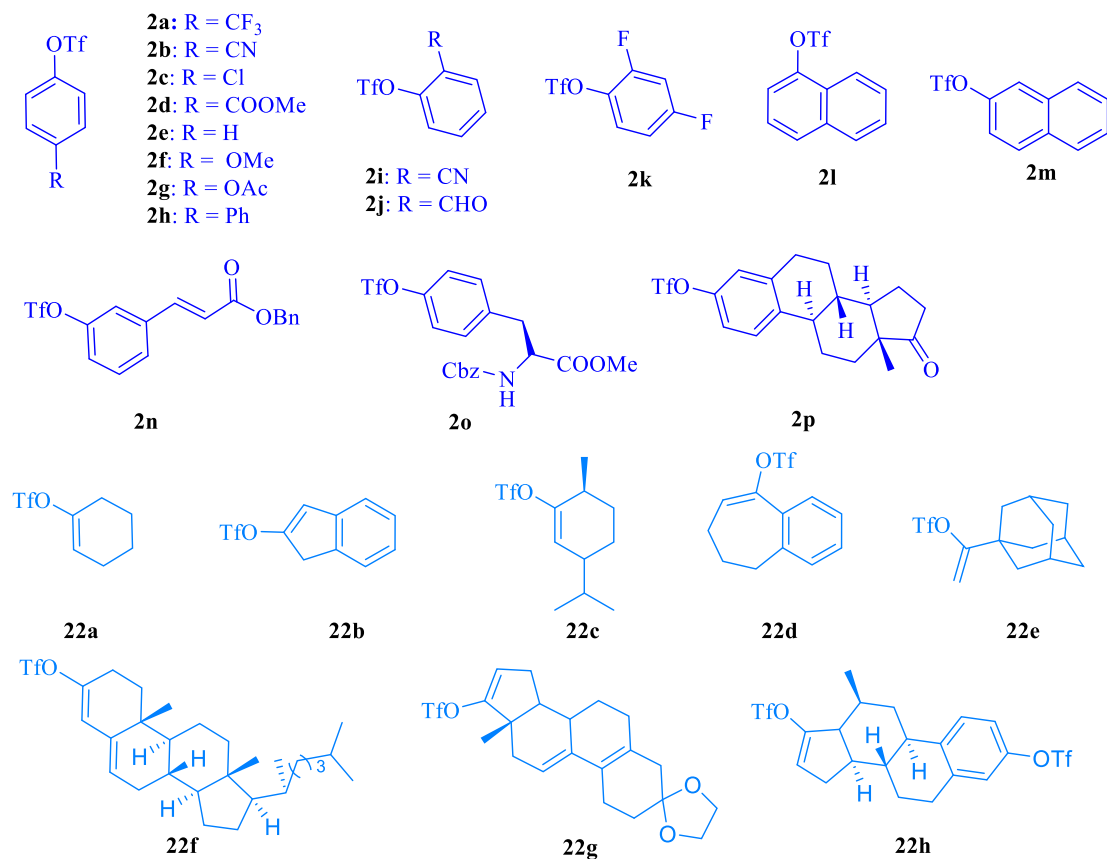

**Table S1.** Optimization of the Reaction Conditions<sup>a</sup>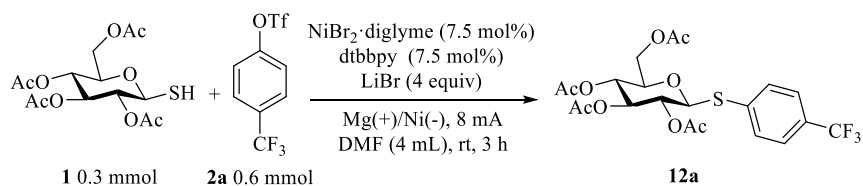

| Entry           | Cat.                                               | Ligand | Solvent | Current | Time | Electrolyte | Yield(%) <sup>b</sup> |
|-----------------|----------------------------------------------------|--------|---------|---------|------|-------------|-----------------------|
| 1 <sup>c</sup>  | NiBr <sub>2</sub> ·diglyme                         | dtbbpy | DMF     | 4 mA    | 6 h  | LiBr        | 53.3                  |
| 2 <sup>c</sup>  | NiBr <sub>2</sub> ·diglyme                         | dtbbpy | DMF     | 8 mA    | 3 h  | LiBr        | 52.6                  |
| 3 <sup>d</sup>  | NiBr <sub>2</sub> ·diglyme                         | dtbbpy | DMF     | 8 mA    | 3 h  | LiBr        | 24                    |
| 4               | NiBr <sub>2</sub> ·diglyme                         | dtbbpy | DMF     | 8 mA    | 3 h  | LiBr        | 71                    |
| 5 <sup>e</sup>  | NiBr <sub>2</sub> ·diglyme                         | dtbbpy | DMF     | 8 mA    | 3 h  | LiBr        | 63.1                  |
| 6 <sup>e</sup>  | NiBr <sub>2</sub> ·diglyme                         | dtbbpy | DMF     | -       | 3 h  | LiBr        | ND                    |
| 7               | NiBr <sub>2</sub> ·diglyme                         | dtbbpy | DMF     | 8 mA    | 3 h  | TBAB        | 58.5                  |
| 8               | NiBr <sub>2</sub> ·diglyme                         | dtbbpy | DMF     | 8 mA    | 3 h  | KI          | 65.1                  |
| 9               | NiBr <sub>2</sub> ·dme                             | dtbbpy | DMF     | 8 mA    | 3 h  | LiBr        | 61                    |
| 10              | Ni(acac) <sub>2</sub>                              | dtbbpy | DMF     | 8 mA    | 3 h  | LiBr        | 41.8                  |
| 11              | Ni(PPh <sub>3</sub> ) <sub>2</sub> Cl <sub>2</sub> | dtbbpy | DMF     | 8 mA    | 3 h  | LiBr        | 7.2                   |
| 12              | NiBr <sub>2</sub> ·diglyme                         | bpy    | DMF     | 8 mA    | 3 h  | LiBr        | 10.6                  |
| 13              | NiBr <sub>2</sub> ·diglyme                         | dtbbpy | DMA     | 8 mA    | 3 h  | LiBr        | 62.5                  |
| 14 <sup>f</sup> | NiBr <sub>2</sub> ·diglyme                         | dtbbpy | DMF     | 8 mA    | 3 h  | LiBr        | 56.4                  |
| 15 <sup>g</sup> | NiBr <sub>2</sub> ·diglyme                         | dtbbpy | DMF     | 8 mA    | 3 h  | LiBr        | 70.5                  |
| 16 <sup>h</sup> | NiBr <sub>2</sub> ·diglyme                         | dtbbpy | DMF     | 8 mA    | 3 h  | LiBr        | 60                    |
| 17 <sup>i</sup> | NiBr <sub>2</sub> ·diglyme                         | dtbbpy | DMF     | 8 mA    | 3 h  | LiBr        | 43.4                  |
| 18 <sup>j</sup> | NiBr <sub>2</sub> ·diglyme                         | dtbbpy | DMF     | 8 mA    | 3 h  | LiBr        | NR                    |
| 19              | -                                                  | dtbbpy | DMF     | 8 mA    | 3 h  | LiBr        | trace                 |
| 20              | NiBr <sub>2</sub> ·diglyme                         | dtbbpy | DMF     | 8 mA    | 3 h  | -           | 28.8                  |
| 21              | NiBr <sub>2</sub> ·diglyme                         | dtbbpy | DMF     | -       | 3 h  | LiBr        | NR                    |
| 22 <sup>k</sup> | NiBr <sub>2</sub> ·diglyme                         | dtbbpy | DMF     | -       | 3 h  | -           | Trace                 |

<sup>a</sup> standard condition: **1** (0.3 mmol), **2a** (0.6 mmol), NiBr<sub>2</sub>·diglyme (7.5 mol%), dtbbpy (7.5 mol%), LiBr (1.2 mmol), DMF (4 mL) in an undivided cell with a Ni as electrode and Mg sheet as anode, 8 mA, rt, 3h. <sup>b</sup> Isolated yield. <sup>c</sup> **3-1a** (0.3 mmol), **3-2a** (0.3 mmol). <sup>d</sup> **3-1a** (0.6 mmol), **3-2a** (0.3 mmol). <sup>e</sup> NEt<sub>3</sub> (1.2 equiv). <sup>f</sup> [Ni] (5 mol%), ligand (5 mol%). <sup>g</sup> [Ni] (10 mol%), ligand (10 mol%). <sup>h</sup> [Ni] (20 mol%), ligand (20 mol%). <sup>i</sup> Zn anode. <sup>j</sup> C cathode. <sup>k</sup> Zn (2 eq).

## Experimental Procedures and Characterization Data of Products

The synthesis procedure and data for the known compounds **1**, **3-11**, **30-32** to see references 1.<sup>1</sup> The synthesis procedure and data for the known compounds **2a-2m** and **2o-p** to see references 2.<sup>2</sup> And the synthesis procedure and data for the known compounds **22a-22h** to see references 3.<sup>3</sup>

### benzyl (E)-3-(3-(((trifluoromethyl)sulfonyl)oxy)phenyl)acrylate **2n**

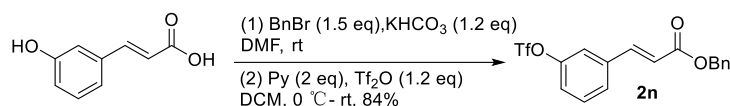

*p*-Hydroxy cinnamic acid (164.2 mg, 1 mmol) was dissolved in 5.0 mL DMF, and KHCO<sub>3</sub> (120 mg, 1.2 mmol) was added slowly. The resultant mixture was stirred for several minutes at room temperature. Then, benzyl bromide (0.2 mL, 1.5 mmol) was added and stirred for 8 h at room temperature. Upon completion, the reaction mixture was added to water and extracted with ethyl acetate. The organic layer was washed with brine and dried over anhydrous magnesium sulfate. The solution was filtered and concentrated, then to dissolve in DCM (2 mL) and Pyridine (0.13 mL, 2 equiv) was added. The mixture was cooled to 0 °C Trifluoromethanesulfonyl anhydride (0.16 mL, 1.2 equiv) was added dropwise and stirred for 1.5 h at room temperature. Thereafter, H<sub>2</sub>O (5 mL) was added, the organic layer was separated, washed with brine, and dried over anhydrous sodium sulfate. The solution was concentrated under reduced pressure and the residue was directly subjected to purification by flash column chromatography to give **2n**. <sup>1</sup>H NMR (400 MHz, CDCl<sub>3</sub>) δ 7.69 (d, *J* = 16.0 Hz, 1H), 7.53 (d, *J* = 7.8 Hz, 1H), 7.48 (t, *J* = 7.9 Hz, 1H), 7.44 – 7.34 (m, 5H), 7.29 (d, *J* = 8.0 Hz, 1H), 6.52 (d, *J* = 16.0 Hz, 1H), 5.26 (s, 2H). <sup>13</sup>C NMR (150 MHz, CDCl<sub>3</sub>) δ 166.1, 149.9, 142.6, 137.1, 135.7, 130.8, 128.7, 128.5, 128.4, 127.9, 122.6, 120.6, 120.4, 118.72 (CF<sub>3</sub>), 66.74. <sup>19</sup>F NMR (565 MHz, CDCl<sub>3</sub>) δ -72.75. HRMS (ESI-TOF) Calculated for C<sub>17</sub>H<sub>14</sub>F<sub>3</sub>O<sub>5</sub>S [M+H]<sup>+</sup> 387.0509, found 387.0510.

### (8R,9R,12S,14R)-12-methyl-7,8,9,11,12,13,14,15-octahydro-6H-cyclopenta[a]phenanthrene-3,16-diyl bis(trifluoromethanesulfonate) **22h**

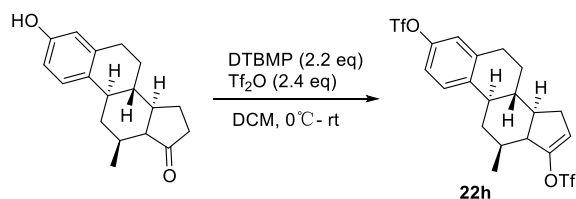

Estrone (1.0 g, 3.7 mmol) was dissolved in 14.8 mL DCM, and 2,6-Di-tert-butyl-4-methylpyridine (1.6 g, 8.1 mmol) was added slowly. The mixture was cooled to 0 °C Trifluoromethanesulfonyl anhydride (1.5 mL, 8.9 mmol) was added dropwise and stirred for 3 h at room temperature. Thereafter, H<sub>2</sub>O (20 mL) was added, the organic layer was separated, washed with brine, and dried over anhydrous sodium sulfate. The solution was concentrated under reduced pressure and the residue was directly subjected to purification by flash column chromatography to give **22h**. <sup>1</sup>H NMR (400 MHz, CDCl<sub>3</sub>) δ 7.31 (d, *J* = 8.7 Hz, 1H), 7.08 – 6.93 (m, 2H), 5.68 – 5.58 (m, 1H), 2.94 (dd, *J* = 8.9, 4.2 Hz, 2H), 2.44 – 2.30 (m, 3H), 2.17 – 2.07 (m, 1H), 2.00 – 1.88 (m, 2H), 1.84 – 1.75 (m, 1H), 1.72 – 1.56 (m, 3H), 1.53 – 1.43 (m, 1H), 1.01 (s, 3H). <sup>13</sup>C NMR (100 MHz, CDCl<sub>3</sub>) δ 159.1, 147.6, 140.4, 139.2, 128.4, 127.8, 126.8, 121.3, 118.8 (CF<sub>3</sub>), 118.6 (CF<sub>3</sub>), 118.3, 53.5, 45.0, 44.3, 36.1, 32.7, 29.2, 28.4, 26.3, 25.6, 15.3. <sup>19</sup>F NMR (376 MHz, CDCl<sub>3</sub>) δ -73.03, -73.60. HRMS (ESI-TOF) Calculated for C<sub>20</sub>H<sub>20</sub>F<sub>6</sub>O<sub>6</sub>S<sub>2</sub>Na [M+Na]<sup>+</sup> 557.0498, found 557.0455.

#### 4-(trifluoromethyl)phenyl-2,3,4,6-tri-*O*-acetyl-1-thio- $\beta$ -D-glucopyranoside **12a**

The reaction was carried out according to the general procedure, using glycosyl thiols **1** (109.3 mg, 0.3mmol), aryl triflates **2a** (110  $\mu$ L, 0.6 mmol), **Solution A** (1 mL), **Solution B** (2 mL) and DMF (1 mL) in 5 mL undivided three-necked bottle. The product was purified by silica chromatography. Compound **12a** (108.3 mg, 71% yield,  $\beta$  only, PE:EA = 3:1,  $R_f$  = 0.25) was obtained as white solid.

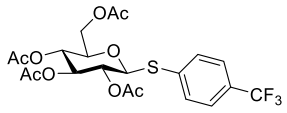  $[\alpha]_D^{25}$  24.0 (c = 0.50, CHCl<sub>3</sub>); <sup>1</sup>H NMR (400 MHz, CDCl<sub>3</sub>)  $\delta$  7.67 – 7.50 (m, 4H), 5.27 (t,  $J$  = 10.0 Hz, 1H, H-3), 5.18 – 4.92 (m, 2H, H-4, H-2), 4.81 (d,  $J$  = 10.0 Hz, 1H, H-1), 4.32 – 4.16 (m, 2H, H-6), 3.87 – 3.71 (m, 1H, H-5), 2.09 (s, 3H), 2.08 (s, 3H), 2.04 (s, 3H), 2.01 (s, 3H). <sup>13</sup>C NMR (100 MHz, CDCl<sub>3</sub>)  $\delta$  170.4, 170.1, 169.3, 169.2, 136.9, 132.2, 130.5, 130.2, 130.0, 129.6, 125.7, 125.7, 125.7, 125.6, 123.9 (CF<sub>3</sub>), 84.8 (C-1), 75.9 (C-5), 73.7 (C-3), 69.7 (C-2), 68.1 (C-4), 62.0 (C-6), 20.6, 20.5. HRMS (ESI-TOF) Calculated for C<sub>21</sub>H<sub>24</sub>F<sub>3</sub>O<sub>9</sub>S [M+H]<sup>+</sup> 509.1093, found 509.1087.

#### 4-cyanobiphenyl-2,3,4,6-tri-*O*-acetyl-1-thio- $\beta$ -D-glucopyranoside **12b**

The reaction was carried out according to the general procedure, using glycosyl thiols **1** (109.3 mg, 0.3mmol), aryl triflates **2b** (95  $\mu$ L, 0.6 mmol), **Solution A** (1 mL), **Solution B** (2 mL) and DMF (1 mL) in 5 mL undivided three-necked bottle. The product was purified by silica chromatography. Compound **12b** (77.9 mg, 56% yield,  $\beta$  only, PE:EA = 3:1,  $R_f$  = 0.25) was obtained as white solid.

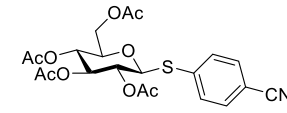  $[\alpha]_D^{25}$  37.8 (c = 0.50, CHCl<sub>3</sub>); <sup>1</sup>H NMR (400 MHz, CDCl<sub>3</sub>)  $\delta$  7.63 – 7.49 (m, 4H), 5.27 (t,  $J$  = 10.0 Hz, 1H, H-3), 5.07 (t,  $J$  = 10.0 Hz, 1H, H-4), 5.03 (t,  $J$  = 8.0 Hz, 1H, H-2), 4.85 (d,  $J$  = 8.0 Hz, 1H, H-1), 4.29 – 4.16 (m, 2H, H-6), 3.88 – 3.72 (m, 1H, H-5), 2.10 (s, 3H), 2.08 (s, 3H), 2.04 (s, 3H), 2.01 (s, 3H). <sup>13</sup>C NMR (100 MHz, CDCl<sub>3</sub>)  $\delta$  170.4, 170.0, 169.4, 169.2, 139.2, 132.3, 131.4, 118.3, 111.3, 84.4 (C-1), 76.0 (C-5), 73.6 (C-3), 69.6 (C-2), 68.0 (C-4), 62.1 (C-6), 20.7, 20.7, 20.5. HRMS (ESI-TOF) Calculated for C<sub>21</sub>H<sub>24</sub>NO<sub>9</sub>S [M+H]<sup>+</sup> 466.1172, found 466.1159.

#### 4-chlorophenyl-2,3,4,6-tri-*O*-acetyl-1-thio- $\beta$ -D-glucopyranoside **12c**

The reaction was carried out according to the general procedure, using glycosyl thiols **1** (109.3 mg, 0.3mmol), aryl triflates **2c** (98  $\mu$ L, 0.6 mmol), **Solution A** (1 mL), **Solution B** (2 mL) and DMF (1 mL) in 5 mL undivided three-necked bottle. The product was purified by silica chromatography. Compound **12c** (90.8 mg, 64% yield,  $\beta$  only, PE:EA = 3:1,  $R_f$  = 0.25) was obtained as white foam.

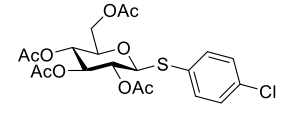  $[\alpha]_D^{25}$  +1.2 (c = 0.50, CHCl<sub>3</sub>); <sup>1</sup>H NMR (400 MHz, CDCl<sub>3</sub>)  $\delta$  7.50 – 7.37 (m, 2H), 7.33 – 7.25 (m, 2H), 5.22 (t,  $J$  = 8 Hz, 1H, H-3), 5.02 (t,  $J$  = 10.0 Hz, 1H, H-4), 4.93 (t,  $J$  = 10.0 Hz, 1H, H-2), 4.65 (d,  $J$  = 12.0 Hz, 1H, H-1), 4.25 – 4.15 (m, 2H, H-6), 3.76 – 3.67 (m, 1H, H-5), 2.09 (s, 3H), 2.08 (s, 3H), 2.02 (s, 3H), 1.99 (s, 3H). <sup>13</sup>C NMR (100 MHz, CDCl<sub>3</sub>)  $\delta$  170.5, 170.1, 169.4, 169.2, 135.0, 129.5, 129.1, 85.2 (C-1), 75.9 (C-5), 73.9 (C-3), 69.8 (C-2), 68.1 (C-4), 62.0 (C-6), 20.74, 20.72, 20.6. HRMS (ESI-TOF) Calculated for C<sub>20</sub>H<sub>23</sub>ClO<sub>9</sub>SNa [M+Na]<sup>+</sup> 497.0649, found 497.0645.

#### 4-methylbenzoate-2,3,4,6-tri-*O*-acetyl-1-thio- $\beta$ -D-glucopyranoside **12d**

The reaction was carried out according to the general procedure, using glycosyl thiols **1** (109.3 mg, 0.3mmol), aryl triflates **2d** (113  $\mu$ L, 0.6 mmol), **Solution A** (1 mL), **Solution B** (2 mL) and DMF (1 mL) in 5 mL undivided three-necked bottle. The product was purified by silica chromatography. Compound **12d** (101.3 mg, 68% yield,  $\beta$  only, PE:EA = 3:1,  $R_f$  = 0.2) was obtained as white solid.

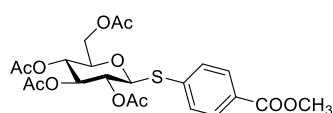

$[\alpha]_{\text{D}}^{25}$  21.4 ( $c = 0.50$ ,  $\text{CHCl}_3$ );  $^1\text{H NMR}$  (400 MHz,  $\text{CDCl}_3$ )  $\delta$  7.97 (d,  $J = 8.0$  Hz, 2H), 7.52 (d,  $J = 8.0$  Hz, 2H), 5.28 (t,  $J = 10.0$  Hz, 1H, H-3), 5.08 (t,  $J = 6.0$  Hz, 1H, H-4), 5.04 (t,  $J = 6.0$  Hz, 1H, H-2), 4.86 (d,  $J = 12.0$  Hz, 1H, H-1), 4.25 (dd,  $J_1 = 12.0$ ,  $J_2 = 4.0$  Hz, 1H, H-6a), 4.19 (dd,  $J_1 = 12.0$ ,  $J_2 = 4.0$  Hz, 1H, H-6b), 3.92 (s, 3H), 3.87 – 3.78 (m, 1H, H-5), 2.10 (s, 3H), 2.08 (s, 3H), 2.04 (s, 3H), 2.01 (s, 3H).  $^{13}\text{C NMR}$  (100 MHz,  $\text{CDCl}_3$ )  $\delta$  170.5, 170.1, 169.3, 169.2, 166.4, 138.7, 130.8, 129.9, 129.3, 84.8 (C-1), 75.9 (C-5), 73.7 (C-3), 69.7 (C-2), 68.1 (C-4), 62.1 (C-6), 52.2, 20.7, 20.6, 20.5. HRMS (ESI-TOF) Calculated for  $\text{C}_{22}\text{H}_{27}\text{O}_{11}\text{S}$   $[\text{M}+\text{H}]^+$  499.1274, found 499.1256.

#### Phenyl-2,3,4,6-tetra-*O*-acetyl-1-thio- $\beta$ -D-glucopyranoside **12e**

The reaction was carried out according to the general procedure, using glycosyl thiols **1** (109.3 mg, 0.3mmol), aryl triflates **2e** (97  $\mu\text{L}$ , 0.6 mmol), **Solution A** (1 mL), **Solution B** (2 mL) and DMF (1 mL) in 5 mL undivided three-necked bottle. The product was purified by silica chromatography. Compound **12e** (73.7 mg, 56% yield,  $\beta$  only, PE:EA = 3:1,  $R_f = 0.3$ ) was obtained as white solid.

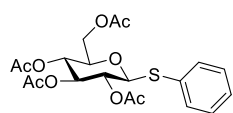

$[\alpha]_{\text{D}}^{25}$  36.0 ( $c = 0.50$ ,  $\text{CHCl}_3$ );  $^1\text{H NMR}$  (400 MHz,  $\text{CDCl}_3$ )  $\delta$  7.50 (m, 2H), 7.40 – 7.16 (m, 3H), 5.24 (t,  $J = 10.0$  Hz, 1H, H-3), 5.04 (t,  $J = 10.0$  Hz, 1H, H-4), 4.97 (t,  $J = 10.0$  Hz, 1H, H-2), 4.73 (d,  $J = 8.0$  Hz, 1H, H-1), 4.27 – 4.15 (m, 2H, H-6), 3.78 – 3.68 (m, 1H, H-5), 2.08 (s, 3H), 2.08 (s, 3H), 2.02 (s, 3H), 1.99 (s, 3H).  $^{13}\text{C NMR}$  (100 MHz,  $\text{CDCl}_3$ )  $\delta$  170.5, 170.1, 169.3, 169.2, 133.0, 131.6, 128.9, 128.4, 85.6 (C-1), 75.7 (C-5), 73.9 (C-3), 69.9 (C-2), 68.2 (C-4), 62.1 (C-6), 20.69, 20.68, 20.54, 20.53. HRMS (ESI-TOF) Calculated for  $\text{C}_{20}\text{H}_{24}\text{O}_9\text{SNa}$   $[\text{M}+\text{Na}]^+$  463.1039, found 463.1018.

#### 4-methoxyphenyl-2,3,4,6-tri-*O*-acetyl-1-thio- $\beta$ -D-glucopyranoside **12f**

The reaction was carried out according to the general procedure, using glycosyl thiols **1** (109.3 mg, 0.3mmol), aryl triflates **2f** (109  $\mu\text{L}$ , 0.6 mmol), **Solution A** (1 mL), **Solution B** (2 mL) and DMF (1 mL) in 5 mL undivided three-necked bottle. The product was purified by silica chromatography. Compound **12e** (28.2 mg, 20% yield,  $\beta$  only, PE:EA = 3:1,  $R_f = 0.3$ ) was obtained as white solid.

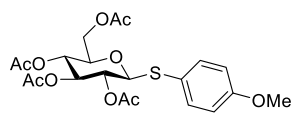

$[\alpha]_{\text{D}}^{25}$  23.0 ( $c = 0.50$ ,  $\text{CHCl}_3$ );  $^1\text{H NMR}$  (600 MHz,  $\text{CDCl}_3$ )  $\delta$  7.44 (d,  $J = 4.0$  Hz, 2H), 6.98 – 6.63 (m, 2H), 5.20 (t,  $J = 6.0$  Hz, 1H), 5.00 (t,  $J = 6.0$  Hz, 1H), 4.89 (t,  $J = 8.0$  Hz, 1H), 4.56 (d,  $J = 8.0$  Hz, 1H), 4.31 – 4.08 (m, 2H), 3.82 (s, 3H), 3.73 – 3.58 (m, 1H), 2.11 (s, 3H), 2.08 (s, 3H), 2.01 (s, 3H), 1.98 (s, 3H).  $^{13}\text{C NMR}$  (150 MHz,  $\text{CDCl}_3$ )  $\delta$  170.6, 170.2, 169.4, 169.3, 160.5, 136.6, 120.8, 114.4, 85.7, 75.7, 74.1, 69.9, 68.2, 62.1, 55.3, 20.81, 20.8, 20.6, 20.6. HRMS (ESI-TOF) Calculated for  $\text{C}_{21}\text{H}_{27}\text{O}_{10}\text{S}$   $[\text{M}+\text{H}]^+$  471.1320, found 471.1320.

#### 4-Acetoxyphenyl-2,3,4,6-tetra-*O*-acetyl-1-thio- $\beta$ -D-glucopyranoside **12g**

The reaction was carried out according to the general procedure, using glycosyl thiols **1** (109.3 mg, 0.3mmol), aryl triflates **2g** (106  $\mu\text{L}$ , 0.6 mmol), **Solution A** (1 mL), **Solution B** (2 mL) and DMF (1 mL) in 5 mL undivided three-necked bottle. The product was purified by silica chromatography. Compound **12g** (31.3 mg, 21% yield,  $\beta$  only, PE:EA = 3:1,  $R_f = 0.3$ ) was obtained as white foam.

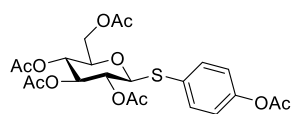

$[\alpha]_{\text{D}}^{25}$  32.0 ( $c = 0.50$ ,  $\text{CHCl}_3$ );  $^1\text{H NMR}$  (400 MHz,  $\text{CDCl}_3$ )  $\delta$  7.53 (d,  $J = 8.0$  Hz, 2H), 7.06 (d,  $J = 8.0$  Hz, 2H), 5.22 (t,  $J = 8.0$  Hz, 1H, H-3), 5.04 (t,  $J = 10.0$  Hz, 1H, H-4), 4.97 (t,  $J = 10.0$  Hz, 1H, H-2), 4.67 (d,  $J = 8.0$  Hz, 1H, H-1), 4.25 – 4.14 (m, 2H, H-6), 3.75 – 3.68 (m, 1H, H-5), 2.31 (s, 3H), 2.10 (s, 3H), 2.08 (s, 3H), 2.02 (s, 3H), 2.00 (s, 3H).  $^{13}\text{C NMR}$  (100 MHz,  $\text{CDCl}_3$ )  $\delta$  170.6, 170.2, 169.4, 169.3, 169.2, 151.1,

134.8, 128.6, 122.2, 85.8 (C-1), 75.8 (C-5), 73.9 (C-3), 70.0 (C-2), 68.2 (C-4), 62.1 (C-6), 21.1, 20.77, 20.75, 20.60, 20.58. HRMS (ESI-TOF) Calculated for C<sub>22</sub>H<sub>27</sub>O<sub>11</sub>S [M+H]<sup>+</sup> 499.1274, found 499.1266.

### 1,1'-biphenyl-2,3,4,6-tetra-O-acetyl-1-thio-β-D-glucopyranoside 12h

The reaction was carried out according to the general procedure, using glycosyl thiols **1** (109.3 mg, 0.3mmol), aryl triflates **2h** (129 μL, 0.6 mmol), **Solution A** (1 mL), **Solution B** (2 mL) and DMF (1 mL) in 5 mL undivided three-necked bottle. The product was purified by silica chromatography. Compound **12h** (91.1 mg, 59% yield, β only, PE:EA = 3:1, R<sub>f</sub> = 0.3) was obtained as white solid.

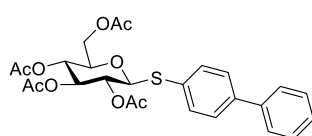

$[\alpha]_D^{25}$  12.7 (c = 0.50, CHCl<sub>3</sub>); <sup>1</sup>H NMR (400 MHz, CDCl<sub>3</sub>) δ 7.61 – 7.52 (m, 6H), 7.45 (t, *J* = 8.0 Hz, 2H), 7.36 (t, *J* = 6.0 Hz, 1H), 5.25 (t, *J* = 8.0 Hz, 1H, H-3), 5.11 – 4.97 (m, 2H, H-4, H-2), 4.74 (d, *J* = 8.0 Hz, 1H, H-1), 4.32 – 4.15 (m, 2H, H-6), 3.80 – 3.71 (m, 1H, H-5), 2.11 (s, 3H), 2.08 (s, 3H), 2.02 (s, 3H), 2.00 (s, 3H). <sup>13</sup>C NMR (100 MHz, CDCl<sub>3</sub>) δ 170.6, 170.2, 169.4, 169.3, 141.4, 140.1, 133.6, 130.4, 128.9, 127.7, 127.6, 127.1, 85.7 (C-1), 75.8 (C-5), 74.0 (C-3), 70.0 (C-2), 68.2 (C-4), 62.1 (C-6), 20.79, 20.78, 20.62, 20.60. HRMS (ESI-TOF) Calculated for C<sub>26</sub>H<sub>28</sub>O<sub>9</sub>SNa [M+Na]<sup>+</sup> 539.1352, found 539.1346.

### 2-cyanophenyl-2,3,4,6-tri-O-acetyl-1-thio-β-D-glucopyranoside 12i

The reaction was carried out according to the general procedure, using glycosyl thiols **1** (109.3 mg, 0.3mmol), aryl triflates **2i** (129 μL, 0.6 mmol), **Solution A** (1 mL), **Solution B** (2 mL) and DMF (1 mL) in 5 mL undivided three-necked bottle. The product was purified by silica chromatography. Compound **12i** (94.5 mg, 68% yield, β only, PE:EA = 3:1, R<sub>f</sub> = 0.25) was obtained as white solid.

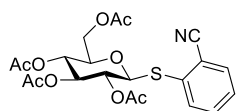

$[\alpha]_D^{25}$  -7.8 (c = 0.50, CHCl<sub>3</sub>); <sup>1</sup>H NMR (400 MHz, CDCl<sub>3</sub>) δ 7.82 (d, *J* = 8.0 Hz, 1H), 7.71 (m, 1H), 7.63 – 7.55 (m, 1H), 7.49 (m, 1H), 5.25 (t, *J* = 10.0 Hz, 1H, H-3), 5.05 (t, *J* = 10.0 Hz, 1H, H-4), 4.94 (t, *J* = 8.0 Hz, 1H, H-2), 4.78 (d, *J* = 12.0 Hz, 1H, H-1), 4.26 (dd, *J*<sub>1</sub> = 12.0, *J*<sub>2</sub> = 4.0 Hz, 1H, H-6a), 4.17 (dd, *J*<sub>1</sub> = 12.0, *J*<sub>1</sub> = 4.0 Hz, 1H, H-6b), 3.83 – 3.74 (m, 1H), 2.14 (s, 3H), 2.10 (s, 3H), 2.03 (s, 3H), 1.99 (s, 3H). <sup>13</sup>C NMR (100 MHz, CDCl<sub>3</sub>) δ 170.5, 170.0, 169.5, 169.4, 135.2, 134.8, 133.7, 132.9, 129.2, 117.9, 116.9, 85.0 (C-1), 76.0 (C-5), 73.7 (C-3), 69.4 (C-2), 68.0 (C-4), 62.0 (C-6), 20.72, 20.69, 20.53. HRMS (ESI-TOF) Calculated for C<sub>21</sub>H<sub>24</sub>NO<sub>9</sub>S [M+H]<sup>+</sup> 466.1172, found 466.1159.

### 2-formylphenyl-2,3,4,6-tri-O-acetyl-1-thio-β-D-glucopyranoside 12j

The reaction was carried out according to the general procedure, using glycosyl thiols **1** (109.3 mg, 0.3mmol), aryl triflates **2j** (101 μL, 0.6 mmol), **Solution A** (1 mL), **Solution B** (2 mL) and DMF (1 mL) in 5 mL undivided three-necked bottle. The product was purified by silica chromatography. Compound **12j** (96.6 mg, 69% yield, β only, PE:EA = 3:1, R<sub>f</sub> = 0.2) was obtained as white solid.

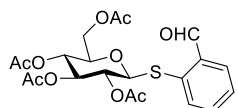

$[\alpha]_D^{25}$  -12.6 (c = 0.50, CHCl<sub>3</sub>); <sup>1</sup>H NMR (400 MHz, CDCl<sub>3</sub>) δ 10.51 (s, 1H), 7.95 (m, 1H), 7.67 (d, *J* = 8.0 Hz, 1H), 7.63 – 7.56 (m, 1H), 7.53 (t, *J* = 8.0 Hz, 1H), 5.22 (t, *J* = 10.0 Hz, 1H, H-3), 5.09 – 4.87 (m, 2H, H-4, H-2), 4.72 (d, *J* = 12.0 Hz, 1H, H-1), 4.22 – 4.04 (m, 2H, H-6), 3.77 – 3.66 (m, 1H, H-5), 2.12 (s, 3H), 2.07 (s, 3H), 2.01 (s, 3H), 1.99 (s, 3H). <sup>13</sup>C NMR (100 MHz, CDCl<sub>3</sub>) δ 191.8, 170.5, 170.1, 169.3, 169.2, 137.8, 135.7, 134.2, 134.0, 129.44, 129.39, 84.6 (C-1), 75.8 (C-5), 73.8 (C-3), 69.9 (C-2), 68.0 (C-4), 62.0 (C-6), 20.7, 20.62, 20.54, 20.52. HRMS (ESI-TOF) Calculated for C<sub>21</sub>H<sub>25</sub>O<sub>10</sub>S [M+H]<sup>+</sup> 469.1168, found 469.1150.

### 2,4-Difluorophenyl-2,3,4,6-tetra-O-acetyl-1-thio-β-D-glucopyranoside 12k

The reaction was carried out according to the general procedure, using glycosyl thiols **1** (109.3 mg,



0.3mmol), aryl triflates **2k** (96  $\mu$ L, 0.6 mmol), **Solution A** (1 mL), **Solution B** (2 mL) and DMF (1 mL) in 5 mL undivided three-necked bottle. The product was purified by silica chromatography. Compound **12k** (101.1 mg, 71% yield,  $\beta$  only, PE:EA = 3:1,  $R_f$  = 0.4) was obtained as white foam.

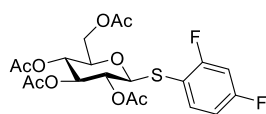

$[\alpha]_D^{25}$  -11.0 (c = 0.50,  $\text{CHCl}_3$ );  $^1\text{H NMR}$  (400 MHz,  $\text{CDCl}_3$ )  $\delta$  7.65 – 7.56 (m, 1H), 6.94 – 6.81 (m, 2H), 5.21 (t,  $J$  = 10.0 Hz, 1H, H-3), 5.04 (t,  $J$  = 10.0 Hz, 1H, H-4), 4.88 (t,  $J$  = 10.0 Hz, 1H, H-2), 4.63 (d,  $J$  = 10.0 Hz, 1H, H-1), 4.22 (dd,  $J_1$  = 12.0,  $J_2$  = 4.0 Hz, 1H, H-6a), 4.14 (dd,  $J_1$  = 12.0,  $J_2$  = 4.0 Hz, 1H, H-6b), 3.73 – 3.65 (m, 1H, H-5), 2.11 (s, 3H), 2.07 (s, 3H), 2.02 (s, 3H), 1.99 (s, 3H).  $^{13}\text{C NMR}$  (100 MHz,  $\text{CDCl}_3$ )  $\delta$  170.6, 170.2, 169.4, 164.7 (CF), 162.2 (CF), 138.2, 138.1, 113.09, 113.05, 112.91, 112.87, 112.2, 112.1, 112.0, 111.9, 104.9, 104.7, 104.4, 84.9 (C-1), 75.9 (C-5), 73.8 (C-3), 69.2 (C-2), 68.0 (C-4), 62.0 (C-6), 20.7, 20.7, 20.61, 20.60. HRMS (ESI-TOF) Calculated for  $\text{C}_{20}\text{H}_{23}\text{F}_2\text{O}_9\text{S}$   $[\text{M}+\text{H}]^+$  499.0850, found 499.0839.

### 1-Naphthoic-2,3,4,6-tetra-O-acetyl-1-thio- $\beta$ -D-glucopyranoside **12l**

The reaction was carried out according to the general procedure, using glycosyl thiols **1** (109.3 mg, 0.3mmol), aryl triflates **2l** (118  $\mu$ L, 0.6 mmol), **Solution A** (1 mL), **Solution B** (2 mL) and DMF (1 mL) in 5 mL undivided three-necked bottle. The product was purified by silica chromatography. Compound **12l** (99.7 mg, 68% yield,  $\beta$  only, PE:EA = 3:1,  $R_f$  = 0.3) was obtained as white solid.

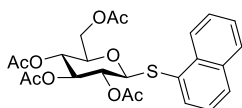

$[\alpha]_D^{25}$  -25.0 (c = 0.50,  $\text{CHCl}_3$ );  $^1\text{H NMR}$  (400 MHz,  $\text{CDCl}_3$ )  $\delta$  8.46 (d,  $J$  = 8.0 Hz, 1H), 7.86 (m, 2H), 7.82 (d,  $J$  = 4.0 Hz, 1H), 7.59 – 7.49 (m, 2H), 7.43 (t,  $J$  = 8.0 Hz, 1H), 5.19 (t,  $J$  = 10.0 Hz, 1H, H-3), 5.09 – 5.05 (m, 2H, H-4, H-2), 4.72 (d,  $J$  = 12.0 Hz, 1H, H-1), 4.19 (dd,  $J_1$  = 12.0,  $J_2$  = 8.0 Hz, 1H, H-6a), 4.08 (dd,  $J_1$  = 12.0,  $J_2$  = 4.0 Hz, 1H, H-6b), 3.64 – 3.56 (m, 1H, H-5), 2.12 (s, 3H), 2.01 (s, 3H), 2.00 (s, 3H), 1.99 (s, 3H).  $^{13}\text{C NMR}$  (100 MHz,  $\text{CDCl}_3$ )  $\delta$  170.5, 170.2, 169.4, 169.3, 134.3, 134.1, 133.5, 129.9, 129.2, 128.5, 126.8, 126.4, 125.8, 125.5, 86.6 (C-1), 75.7 (C-5), 74.0 (C-3), 70.4 (C-2), 68.2 (C-4), 62.2 (C-6), 20.8, 20.7, 20.58, 20.55. HRMS (ESI-TOF) Calculated for  $\text{C}_{24}\text{H}_{27}\text{O}_9\text{S}$   $[\text{M}+\text{H}]^+$  491.1376, found 491.1380.

### 2-Naphthoic-2,3,4,6-tetra-O-acetyl-1-thio- $\beta$ -D-glucopyranoside **12m**

The reaction was carried out according to the general procedure, using glycosyl thiols **1** (109.3 mg, 0.3mmol), aryl triflates **2m** (111  $\mu$ L, 0.6 mmol), **Solution A** (1 mL), **Solution B** (2 mL) and DMF (1 mL) in 5 mL undivided three-necked bottle. The product was purified by silica chromatography. Compound **12m** (117.3 mg, 80% yield,  $\beta$  only, PE:EA = 3:1,  $R_f$  = 0.3) was obtained as white solid.

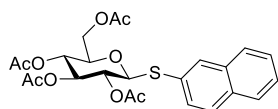

$[\alpha]_D^{25}$  2.4 (c = 0.50,  $\text{CHCl}_3$ );  $^1\text{H NMR}$  (400 MHz,  $\text{CDCl}_3$ )  $\delta$  7.99 (s, 1H), 7.85 – 7.75 (m, 3H), 7.56 (m, 1H), 7.52 – 7.46 (m, 2H), 5.24 (t,  $J$  = 10.0 Hz, 1H, H-3), 5.03 (dd,  $J_1$  = 10.0,  $J_2$  = 8.0 Hz, 2H, H-4, H-2), 4.79 (d,  $J$  = 8.0 Hz, 1H, H-1), 4.24 (dd,  $J_1$  = 12.0,  $J_2$  = 8.0 Hz, 1H, H-6a), 4.18 (m, 1H, H-6b), 3.77 – 3.68 (m, 1H, H-5), 2.11 (s, 3H), 2.03 (s, 3H), 2.01 (s, 3H), 1.98 (s, 3H).  $^{13}\text{C NMR}$  (100 MHz,  $\text{CDCl}_3$ )  $\delta$  170.6, 170.2, 169.4, 169.3, 133.5, 132.9, 132.7, 130.2, 128.8, 128.5, 127.7, 126.8, 126.7, 85.8 (C-1), 75.9 (C-5), 75.8 (C-5), 74.0 (C-3), 70.1 (C-2), 68.2 (C-4), 62.2 (C-6), 20.80, 20.77, 20.71, 20.69, 20.58, 20.56. HRMS (ESI-TOF) Calculated for  $\text{C}_{24}\text{H}_{30}\text{O}_9\text{SN}$   $[\text{M}+\text{NH}_4]^+$  508.1641, found 508.1685.

### benzyl cinnamate-2,3,4,6-tetra-O-acetyl-1-thio- $\beta$ -D-glucopyranoside **12n**

The reaction was carried out according to the general procedure, using glycosyl thiols **1** (109.3 mg, 0.3mmol), aryl triflates **2n** (231 mg, 0.6 mmol), **Solution A** (1 mL), **Solution B** (2 mL) and DMF (1 mL) in 5 mL undivided three-necked bottle. The product was purified by silica chromatography. Compound **12n** (96.9 mg, 54% yield,  $\beta$  only, PE:EA = 3:1,  $R_f$  = 0.3) was obtained as colorless oil.

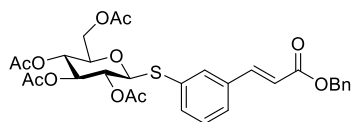

$[\alpha]_D^{25}$  26.4 ( $c = 0.50$ ,  $\text{CHCl}_3$ );  $^1\text{H NMR}$  (400 MHz,  $\text{CDCl}_3$ )  $\delta$  7.74 – 7.63 (m, 2H), 7.53 – 7.46 (m, 2H), 7.43 – 7.38 (m, 3H), 7.37 – 7.31 (m, 2H), 6.51 (d,  $J = 16.0$  Hz, 1H), 5.30 – 5.19 (m, 3H, H-3), 5.02 (t,  $J = 8.0$  Hz, 1H, H-4), 4.96 (t,  $J = 10.0$  Hz, 1H, H-2), 4.71 (d,  $J = 12.0$

Hz, 1H, H-1), 4.24 (dd,  $J_1 = 12.0$ ,  $J_2 = 4.0$  Hz, 1H, H-6a), 4.17 (dd,  $J_1 = 12.0$ ,  $J_2 = 4.0$  Hz, 1H, H-6b), 3.78 – 3.72 (m, 1H, H-5), 2.09 (s, 3H), 2.03 (s, 3H), 2.02 (s, 3H), 1.99 (s, 3H).  $^{13}\text{C NMR}$  (101 MHz,  $\text{CDCl}_3$ )  $\delta$  170.6, 170.2, 169.4, 169.2, 166.5, 144.1, 135.9, 135.2, 134.8, 132.7, 132.4, 129.4, 128.6, 128.3, 128.0, 119.0, 85.3 (C-1), 75.9 (C-5), 73.9 (C-3), 69.8 (C-2), 68.1 (C-4), 66.5, 62.1 (C-6), 20.74, 20.65, 20.6. HRMS (ESI-TOF) Calculated for  $\text{C}_{30}\text{H}_{33}\text{O}_{11}\text{S}$   $[\text{M}+\text{H}]^+$  601.1738, found 601.1737.

**((4-((R)-2-(((benzyloxy)carbonyl)amino)-3-methoxy-3-oxopropyl)phenyl)-2,3,4,6-tetra-O-acetyl-1-thio-β-D-glucopyranoside 12o**

The reaction was carried out according to the general procedure, using glycosyl thiols **1** (109.3 mg, 0.3mmol), aryl triflates **2o** (276 mg, 0.6 mmol), **Solution A** (1 mL), **Solution B** (2 mL) and DMF (1 mL) in 5 mL undivided three-necked bottle. The product was purified by silica chromatography. Compound **12o** (60.6 mg, 30% yield, β only, PE:EA = 3:1,  $R_f = 0.3$ ) was obtained as white foam.

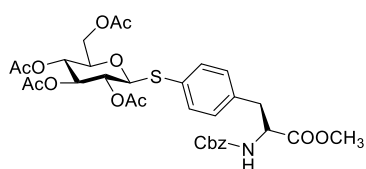

$[\alpha]_D^{25}$  30.0 ( $c = 0.50$ ,  $\text{CHCl}_3$ );  $^1\text{H NMR}$  (400 MHz,  $\text{CDCl}_3$ )  $\delta$  7.42 – 7.29 (m, 7H), 7.05 (d,  $J = 8.0$  Hz, 2H), 5.28 (d,  $J = 8.0$  Hz, 1H), 5.22 (t,  $J = 10.0$  Hz, 1H, H-3), 5.12 – 5.00 (m, 3H, H-4), 4.95 (t,  $J = 10.0$

Hz, 1H, H-2), 4.72 – 4.63 (m, 2H, H-1), 4.28 – 4.10 (m, 2H, H-6a, H-6b), 3.73 (s, 3H), 3.18 – 3.03 (m, 2H, H-5), 2.07 (s, 6H), 2.02 (s, 3H), 1.98 (s, 3H), 1.73 (s, 1H).  $^{13}\text{C NMR}$  (100 MHz,  $\text{CDCl}_3$ )  $\delta$  171.8, 170.6, 170.2, 169.4, 169.3, 155.6, 136.3, 136.2, 133.2, 130.5, 129.9, 128.6, 128.3, 128.1, 85.7 (C-1), 75.8 (C-5), 74.0 (C-3), 69.9 (C-2), 68.2 (C-4), 67.0, 62.1 (C-6), 54.7, 52.4, 37.7, 20.7, 20.6. HRMS (ESI-TOF) Calculated for  $\text{C}_{32}\text{H}_{41}\text{N}_2\text{O}_{13}\text{S}$   $[\text{M}+\text{NH}_4]^+$  675.2224, found 675.2238.

**((((8S,9R,13R,14R)-13-methyl-17-oxo-7,8,9,11,12,13,14,15,16,17-decahydro-6H-cyclopenta[a]phenanthren-3-yl)-2,3,4,6-tetra-O-acetyl-1-thio-β-D-glucopyranoside 12p**

The reaction was carried out according to the general procedure, using glycosyl thiols **1** (109.3 mg, 0.3mmol), aryl triflates **2p** (276 mg, 0.6 mmol), **Solution A** (1 mL), **Solution B** (2 mL) and DMF (1 mL) in 5 mL undivided three-necked bottle. The product was purified by silica chromatography. Compound **12p** (92.2 mg, 50% yield, β only, PE:EA = 3:1,  $R_f = 0.3$ ) was obtained as white foam.

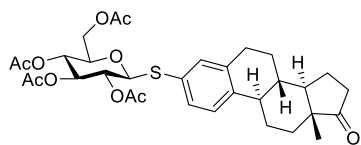

$[\alpha]_D^{25}$  63.8 ( $c = 0.50$ ,  $\text{CHCl}_3$ );  $^1\text{H NMR}$  (400 MHz,  $\text{CDCl}_3$ )  $\delta$  7.27 (s, 1H), 7.23 (d,  $J = 8.0$  Hz, 2H), 5.21 (t,  $J = 10.0$  Hz, 1H, H-3), 5.04 (t,  $J = 10.0$  Hz, 1H, H-4), 4.93 (t,  $J = 10.0$  Hz, 1H, H-2), 4.66 (d,  $J = 8.0$  Hz, 1H, H-1), 4.24 (dd,  $J_1 = 12.0$ ,  $J_2 = 4.0$  Hz, 1H, H-6a), 4.18

(dd,  $J_1 = 12.0$ ,  $J_2 = 4.0$  Hz, 1H, H-6b), 3.77 – 3.69 (m, 1H, H-5), 2.95 – 2.86 (m, 2H), 2.52 (dd,  $J_1 = 16.0$ ,  $J_2 = 8.0$  Hz, 1H), 2.45 – 2.35 (m, 1H), 2.36 – 2.24 (m, 1H), 2.17 (m, 1H), 2.11 – 1.95 (m, 16H), 1.68 – 1.40 (m, 5H), 0.93 (s, 3H).  $^{13}\text{C NMR}$  (100 MHz,  $\text{CDCl}_3$ )  $\delta$  170.6, 170.2, 169.4, 169.2, 140.5, 137.38, 134.3, 131.1, 127.9, 126.0, 85.7 (C-1), 75.7 (C-5), 74.1 (C-3), 69.9 (C-2), 68.2 (C-4), 62.1 (C-6), 50.5, 47.9, 44.3, 37.9, 35.8, 31.6, 29.3, 26.3, 25.6, 21.6, 20.80, 20.77, 20.6, 13.9, 13.8. HRMS (ESI-TOF) Calculated for  $\text{C}_{32}\text{H}_{41}\text{O}_{10}\text{S}$   $[\text{M}+\text{H}]^+$  617.2420, found 617.2408.

**4-(trifluoromethyl)phenyl-2,3,4,6-tetra-O-benzoyl-1-thio-β-D-glucopyranoside 13a**

The reaction was carried out according to the general procedure, using glycosyl thiols **3** (183 mg, 0.3mmol), aryl triflates **2a** (110 μL, 0.6 mmol), **Solution A** (1 mL), **Solution B** (2 mL) and DMF

(1 mL) in 5 mL undivided three-necked bottle. The product was purified by silica chromatography. Compound **13a** (161.2 mg, 71% yield,  $\beta$  only, PE:EA = 4:1,  $R_f$  = 0.3) was obtained as white foam.

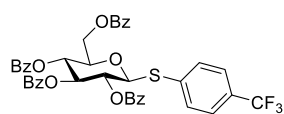

$[\alpha]_D^{25}$  44.1 (c = 0.50,  $\text{CHCl}_3$ );  $^1\text{H NMR}$  (400 MHz,  $\text{CDCl}_3$ )  $\delta$  8.09 – 8.03 (m, 2H), 7.99 – 7.89 (m, 4H), 7.84 – 7.77 (m, 2H), 7.61 (t,  $J$  = 6.0 Hz, 1H), 7.58 – 7.34 (m, 11H), 7.32 – 7.23 (m, 4H), 5.97 (t,  $J$  = 10.0 Hz, 1H, H-3), 5.63 (t,  $J$  = 10.0 Hz, 1H, H-4), 5.54 (t,  $J$  = 10.0 Hz, 1H, H-2), 5.13 (d,  $J$  = 8.0 Hz, 1H, H-1), 4.73 (dd,  $J_1$  = 12.0,  $J_2$  = 4.0 Hz, 1H, H-6a), 4.51 (dd,  $J$  = 12.0, 4.0 Hz, 1H, H-6b), 4.31 – 4.23 (m, 1H, H-5).  $^{13}\text{C NMR}$  (100 MHz,  $\text{CDCl}_3$ )  $\delta$  166.0, 165.8, 165.2, 165.1, 137.1, 133.6, 133.54, 133.49, 133.4, 132.0, 130.1, 129.9, 129.8, 129.5, 128.9, 128.7, 128.60, 128.56, 128.5, 128.4, 125.71, 125.67, 123.9 ( $\text{CF}_3$ ), 85.4 (C-1), 76.6 (C-5), 74.0 (C-3), 70.4 (C-2), 69.3 (C-4), 63.1 (C-6). HRMS (ESI-TOF) Calculated for  $\text{C}_{41}\text{H}_{31}\text{F}_3\text{O}_9\text{SNa}$   $[\text{M}+\text{Na}]^+$  779.1539, found 779.1533.

#### 4-(methoxycarbonyl)phenyl-2,3,4,6-tetra-O-benzoyl-1-thio- $\beta$ -D-glucopyranoside **13d**

The reaction was carried out according to the general procedure, using glycosyl thiols **3** (183 mg, 0.3mmol), aryl triflates **2d** (113  $\mu\text{L}$ , 0.6 mmol), **Solution A** (1 mL), **Solution B** (2 mL) and DMF (1 mL) in 5 mL undivided three-necked bottle. The product was purified by silica chromatography. Compound **13d** (138.9 mg, 62% yield,  $\beta$  only, PE:EA = 3:1,  $R_f$  = 0.25) was obtained as white foam.

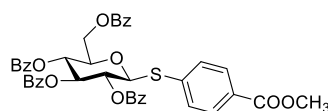

$[\alpha]_D^{25}$  47.0 (c = 0.50,  $\text{CHCl}_3$ );  $^1\text{H NMR}$  (400 MHz,  $\text{CDCl}_3$ )  $\delta$  8.05 (d,  $J$  = 4.0 Hz, 2H), 7.94 (m, 4H), 7.80 (t,  $J$  = 6.0 Hz, 4H), 7.61 (t,  $J$  = 6.0 Hz, 1H), 7.57 – 7.33 (m, 11H), 7.28 (m, 2H), 5.97 (t,  $J$  = 10.0 Hz, 1H, H-3), 5.64 (t,  $J$  = 10.0 Hz, 1H, H-4), 5.57 (t,  $J$  = 8.0 Hz, 1H, H-2), 5.19 (d,  $J$  = 10.0 Hz, 1H, H-1), 4.70 (d,  $J$  = 12.0 Hz, 1H, H-6a), 4.50 (m, 1H, H-6b), 4.34 – 4.23 (m, 1H, H-5), 3.90 (s, 3H).  $^{13}\text{C NMR}$  (100 MHz,  $\text{CDCl}_3$ )  $\delta$  166.4, 166.1, 165.8, 165.2, 165.1, 138.8, 133.6, 133.5, 133.4, 130.9, 130.0, 129.92, 129.90, 129.79, 129.76, 129.5, 129.3, 128.9, 128.64, 128.60, 128.55, 128.50, 128.48, 128.3, 85.3 (C-1), 76.6 (C-5), 74.0 (C-3), 70.4 (C-2), 69.3 (C-4), 63.2 (C-6), 52.2. HRMS (ESI-TOF) Calculated for  $\text{C}_{30}\text{H}_{33}\text{O}_{11}\text{S}$   $[\text{M}+\text{H}]^+$  601.1738, found 601.1737.

#### 4-(trifluoromethyl)phenyl-2,3,4,6-tetra-O-acetyl-1-thio- $\beta$ -D-galactopyranoside **14a**

The reaction was carried out according to the general procedure, using glycosyl thiols **4** (109.3 mg, 0.3mmol), aryl triflates **2a** (110  $\mu\text{L}$ , 0.6 mmol), **Solution A** (1 mL), **Solution B** (2 mL) and DMF (1 mL) in 5 mL undivided three-necked bottle. The product was purified by silica chromatography. Compound **14a** (93 mg, 61% yield,  $\beta$  only, PE:EA = 3:1,  $R_f$  = 0.3) was obtained as white solid.

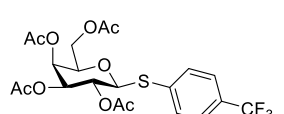

$[\alpha]_D^{25}$  15.4 (c = 0.50,  $\text{CHCl}_3$ );  $^1\text{H NMR}$  (400 MHz,  $\text{CDCl}_3$ )  $\delta$  7.62 (d,  $J$  = 8.0 Hz, 2H), 7.56 (d,  $J$  = 12.0 Hz, 2H), 5.44 (d,  $J$  = 2.7 Hz, 1H, H-4), 5.25 (t,  $J$  = 10.0 Hz, 1H, H-2), 5.08 (dd,  $J_1$  = 8.0,  $J_2$  = 4.0 Hz, 1H, H-3), 4.79 (d,  $J$  = 12.0 Hz, 1H, H-1), 4.20 (dd,  $J_1$  = 12.0,  $J_2$  = 4.0 Hz, 1H, H-6a), 4.12 (dd,  $J_1$  = 12.0,  $J_2$  = 4.0 Hz, 1H, H-6b), 3.99 (t,  $J$  = 6.0 Hz, 1H, H-5), 2.12 (s, 3H), 2.10 (s, 3H), 2.05 (s, 3H), 1.98 (s, 3H).  $^{13}\text{C NMR}$  (100 MHz,  $\text{CDCl}_3$ )  $\delta$  170.3, 170.1, 170.0, 169.4, 137.6, 130.1, 129.8, 129.5, 125.64, 125.61, 125.57, 123.9 ( $\text{CF}_3$ ), 85.5 (C-1), 74.6 (C-5), 71.9 (C-3), 67.1 (C-4), 67.0 (C-2), 61.6 (C-5), 20.8, 20.63, 20.55, 20.5. HRMS (ESI-TOF) Calculated for  $\text{C}_{21}\text{H}_{24}\text{F}_3\text{O}_9\text{S}$   $[\text{M}+\text{H}]^+$  509.1093, found 509.1089.

#### 2-cyanophenyl-2,3,4,6-tetra-O-acetyl-1-thio- $\beta$ -D-galactopyranoside **14i**

The reaction was carried out according to the general procedure, using glycosyl thiols **4** (109.3 mg, 0.3mmol), aryl triflates **2i** (129  $\mu\text{L}$ , 0.6 mmol), **Solution A** (1 mL), **Solution B** (2 mL) and DMF (1 mL) in 5 mL undivided three-necked bottle. The product was purified by silica chromatography. Compound **14i** (85.2 mg, 61% yield,  $\beta$  only, PE:EA = 3:1,  $R_f$  = 0.3) was obtained as white solid.

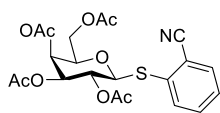

$[\alpha]_D^{25}$  17.8 ( $c = 0.50$ ,  $\text{CHCl}_3$ );  $^1\text{H NMR}$  (400 MHz,  $\text{CDCl}_3$ )  $\delta$  7.86 (d,  $J = 8.0$  Hz, 1H), 7.71 (d,  $J = 8.0$  Hz, 1H), 7.61 – 7.54 (m, 1H), 7.47 (t,  $J = 8.0$  Hz, 1H), 5.44 (d,  $J = 4.0$  Hz, 1H, H-4), 5.22 (t,  $J = 10.0$  Hz, 1H, H-2), 5.07 (dd,  $J_1 = 8.0$ ,  $J_2 = 4.0$  Hz, 1H, H-3), 4.77 (d,  $J = 12.0$  Hz, 1H, H-1), 4.20 (dd,  $J_1 = 12.0$ ,  $J_2 = 8.0$  Hz, 1H, H-6a), 4.12 (dd,  $J = 12.0$ , 8.0 Hz, 1H, H-6b), 3.97 (t,  $J = 8.0$  Hz, 1H, H-5), 2.16 (s, 3H), 2.13 (s, 3H), 2.05 (s, 3H), 1.98 (s, 3H).  $^{13}\text{C NMR}$  (100 MHz,  $\text{CDCl}_3$ )  $\delta$  170.3, 170.01, 169.95, 169.7, 135.7, 134.7, 133.7, 132.7, 129.0, 117.5, 116.9, 86.0 (C-1), 74.7 (C-5), 71.8 (C-3), 67.1 (C-4), 66.6 (C-2), 61.5 (C-5), 20.8, 20.7, 20.6, 20.5. HRMS (ESI-TOF) Calculated for  $\text{C}_{21}\text{H}_{24}\text{NO}_9\text{S}$   $[\text{M}+\text{H}]^+$  466.1172, found 466.1157.

#### 4-(trifluoromethyl)phenyl-2,3,4,6-tetra-*O*-benzoyl-1-thio- $\beta$ -D-galactopyranoside 15a

The reaction was carried out according to the general procedure, using glycosyl thiols **5** (183 mg, 0.3mmol), aryl triflates **2a** (110  $\mu\text{L}$ , 0.6 mmol), **Solution A** (1 mL), **Solution B** (2 mL) and DMF (1 mL) in 5 mL undivided three-necked bottle. The product was purified by silica chromatography. Compound **15a** (156.6 mg, 69% yield,  $\beta$  only, PE:EA = 3:1,  $R_f = 0.3$ ) was obtained as white foam.

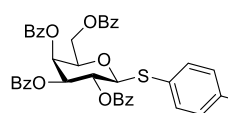

$[\alpha]_D^{25}$  83.1 ( $c = 0.50$ ,  $\text{CHCl}_3$ );  $^1\text{H NMR}$  (400 MHz,  $\text{CDCl}_3$ )  $\delta$  8.04 (d,  $J = 8.0$  Hz, 2H), 7.97 (d,  $J = 4.0$  Hz, 4H), 7.76 (d,  $J = 8.0$  Hz, 2H), 7.70 – 7.58 (m, 4H), 7.56 – 7.37 (m, 10H), 7.27 – 7.20 (m, 2H), 6.04 (s, 1H, H-4), 5.81 (t,  $J = 8.0$  Hz, 1H, H-3), 5.66 (d,  $J = 8.0$  Hz, 1H, H-2), 5.12 (d,  $J = 8.0$  Hz, 1H, H-1), 4.71 – 4.61 (m, 1H, H-6a), 4.57 – 4.41 (m, 2H, H-6b, H-5).  $^{13}\text{C NMR}$  (100 MHz,  $\text{CDCl}_3$ )  $\delta$  166.1, 165.5, 165.2, 136.9, 133.8, 133.6, 133.5, 133.4, 132.5, 129.9, 129.9, 129.80, 129.78, 129.4, 129.0, 128.8, 128.7, 128.60, 128.56, 128.5, 128.4, 125.7, 124.1 ( $\text{CF}_3$ ), 85.4 (C-1), 75.5 (C-5), 72.7 (C-2), 68.3 (C-4), 67.8 (C-3), 62.7 (C-6). HRMS (ESI-TOF) Calculated for  $\text{C}_{21}\text{H}_{24}\text{NO}_9\text{S}$   $[\text{M}+\text{H}]^+$  466.1172, found 466.1159.

#### 4-(trifluoromethyl)phenyl-2,3,4,6-tetra-*O*-acetyl-1-thio- $\alpha$ -D-mannopyranoside 16a

The reaction was carried out according to the general procedure, using glycosyl thiols **6** (109.3 mg, 0.3mmol), aryl triflates **2a** (110  $\mu\text{L}$ , 0.6 mmol), **Solution A** (1 mL), **Solution B** (2 mL) and DMF (1 mL) in 5 mL undivided three-necked bottle. The product was purified by silica chromatography. Compound **16a** (65.6 mg, 43% yield,  $\alpha$  only, PE:EA = 3:1,  $R_f = 0.3$ ) was obtained as white solid.

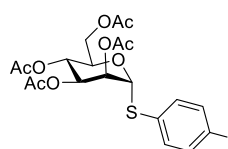

$[\alpha]_D^{25}$  44.4 ( $c = 0.50$ ,  $\text{CHCl}_3$ );  $^1\text{H NMR}$  (400 MHz,  $\text{CDCl}_3$ )  $\delta$  7.66 – 7.51 (m, 4H), 5.61 (d,  $J = 1.1$  Hz, 1H, H-1), 5.49 (dd,  $J_1 = 3.0$ ,  $J_2 = 1.6$  Hz, 1H, H-2), 5.40 – 5.27 (m, 2H, H-4, H-3), 4.51 – 4.42 (m, 1H, H-5), 4.30 (dd,  $J_1 = 12.0$ ,  $J_2 = 6.0$  Hz, 1H, H-6a), 4.11 (dd,  $J_1 = 12.0$ ,  $J_2 = 4.0$  Hz, 1H, H-6b), 2.18 (s, 3H), 2.08 (s, 3H), 2.03 (s, 6H).  $^{13}\text{C NMR}$  (100 MHz,  $\text{CDCl}_3$ )  $\delta$  170.5, 169.9, 169.8, 169.7, 137.9, 130.7, 129.9, 129.6, 126.0, 125.93, 125.89, 123.8 ( $\text{CF}_3$ ), 84.8 (C-1), 84.7, 70.7 (C-2), 69.9 (C-5), 69.3 (C-3), 66.2 (C-4), 62.3 (C-6), 20.9, 20.8, 20.7, 20.62, 20.60. HRMS (ESI-TOF) Calculated for  $\text{C}_{21}\text{H}_{24}\text{F}_3\text{O}_9\text{S}$   $[\text{M}+\text{H}]^+$  509.1093, found 509.1094.

#### 2-cyanophenyl-2,3,4,6-tetra-*O*-acetyl-1-thio- $\alpha$ -D-mannopyranoside 16i

The reaction was carried out according to the general procedure, using glycosyl thiols **6** (109.3 mg, 0.3mmol), aryl triflates **2i** (129  $\mu\text{L}$ , 0.6 mmol), **Solution A** (1 mL), **Solution B** (2 mL) and DMF (1 mL) in 5 mL undivided three-necked bottle. The product was purified by silica chromatography. Compound **16i** (64.2 mg, 46% yield,  $\alpha$  only, PE:EA = 3:1,  $R_f = 0.3$ ) was obtained as white solid.

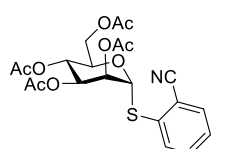

$[\alpha]_D^{25}$  35.4 ( $c = 0.50$ ,  $\text{CHCl}_3$ );  $^1\text{H NMR}$  (400 MHz,  $\text{CDCl}_3$ )  $\delta$  7.75 (d,  $J = 8.0$  Hz, 1H), 7.70 (dd,  $J_1 = 8.0$ ,  $J_2 = 1.2$  Hz, 1H), 7.61 – 7.55 (m, 1H), 7.48 – 7.41 (m, 1H), 5.58 – 5.53 (m, 2H, H-1, H-2), 5.38 (t,  $J = 10.0$  Hz, 1H, H-4), 5.31 (dd,  $J_1 = 12.0$ ,  $J_2 = 4.0$  Hz, 1H, H-3), 4.63 – 4.53 (m, 1H, H-5), 4.34 (dd,  $J_1 = 12.0$ ,  $J_2 = 4.0$  Hz,

1H, H-6a), 4.12 (dd,  $J_1 = 12.0$ ,  $J_2 = 4.0$  Hz, 1H, H-6b), 2.17 (s, 3H), 2.08 (s, 3H), 2.04 (s, 3H), 2.03 (s, 3H).  $^{13}\text{C}$  NMR (100 MHz,  $\text{CDCl}_3$ )  $\delta$  170.4, 169.8, 169.7, 136.7, 133.9, 133.8, 133.4, 128.8, 117.2, 117.0, 86.3 (C-1), 70.7 (C-2), 70.3 (C-5), 69.2 (C-3), 65.9 (C-4), 62.1 (C-6), 20.8, 20.68, 20.66, 20.6. HRMS (ESI-TOF) Calculated for  $\text{C}_{21}\text{H}_{24}\text{NO}_9\text{S}$   $[\text{M}+\text{H}]^+$  466.1167, found 466.1168.

#### 4-(trifluoromethyl)phenyl-2,3,5-tri-*O*-acetyl-1-thio- $\beta$ -D-ribofuranoside 17a

The reaction was carried out according to the general procedure, using glycosyl thiols **7** (87.7 mg, 0.3mmol), aryl triflates **2a** (110  $\mu\text{L}$ , 0.6 mmol), **Solution A** (1 mL), **Solution B** (2 mL) and DMF (1 mL) in 5 mL undivided three-necked bottle. The product was purified by silica chromatography. Compound **17a** (66.8 mg, 51% yield,  $\alpha$  only, PE:EA = 3:1,  $R_f = 0.3$ ) was obtained as white foam.

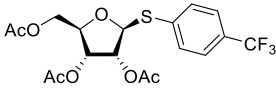  $[\alpha]_{\text{D}}^{25}$  0.9 ( $c = 0.50$ ,  $\text{CHCl}_3$ );  $^1\text{H}$  NMR (400 MHz,  $\text{CDCl}_3$ )  $\delta$  7.59 – 7.54 (m, 4H), 5.50 (t,  $J = 4.0$  Hz, 1H, H-3), 5.28 (d,  $J = 8.0$  Hz, 1H, H-1), 5.14 – 5.05 (m, 2H, H-4, H-2), 4.18 (dd,  $J_1 = 12.0$ ,  $J_2 = 4.0$  Hz, 1H, H-5a), 3.84 (dd,  $J_1 = 12.0$ ,  $J_2 = 8.0$  Hz, 1H, H-5b), 2.12 (s, 3H), 2.11 (s, 3H), 2.08 (s, 3H).  $^{13}\text{C}$  NMR (100 MHz,  $\text{CDCl}_3$ )  $\delta$  169.73, 169.70, 169.3, 137.7, 131.1, 130.2, 130.1, 129.8, 129.5, 129.2, 125.92, 125.88, 125.84, 125.80, 123.9 ( $\text{CF}_3$ ), 83.5 (C-1), 68.2 (C-2), 67.1 (C-3), 66.33, 66.29 (C-4), 63.4 (C-5), 20.73, 20.70, 20.66. HRMS (ESI-TOF) Calculated for  $\text{C}_{18}\text{H}_{20}\text{F}_3\text{O}_7\text{S}$   $[\text{M}+\text{H}]^+$  437.0882, found 437.0880.

#### 4-(trifluoromethyl)phenyl-2,3,4-tri-*O*-acetyl-1-thio- $\alpha$ -L-rhamnopyranoside 18a

The reaction was carried out according to the general procedure, using glycosyl thiols **8** (92 mg, 0.3mmol), aryl triflates **2a** (110  $\mu\text{L}$ , 0.6 mmol), **Solution A** (1 mL), **Solution B** (2 mL) and DMF (1 mL) in 5 mL undivided three-necked bottle. The product was purified by silica chromatography. Compound **18a** (56.7 mg, 42% yield,  $\beta$  only, PE:EA = 3:1,  $R_f = 0.3$ ) was obtained as white foam.

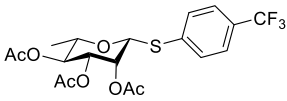  $[\alpha]_{\text{D}}^{25}$  -12.1 ( $c = 0.50$ ,  $\text{CHCl}_3$ );  $^1\text{H}$  NMR (400 MHz,  $\text{CDCl}_3$ )  $\delta$  7.53 – 7.58 (m, 4H), 5.54 (s, 1H, H-1), 5.49 (dd,  $J_1 = 3.1$ ,  $J_2 = 1.5$  Hz, 1H, H-2), 5.26 (dd,  $J_1 = 12.0$ ,  $J_2 = 4.0$  Hz, 1H, H-3), 5.17 (t,  $J = 10.0$  Hz, 1H, H-4), 4.37 – 4.26 (m, 1H, H-5), 2.17 (s, 3H), 2.08 (s, 3H), 2.02 (s, 3H), 1.26 (d,  $J = 6.2$  Hz, 3H).  $^{13}\text{C}$  NMR (100 MHz,  $\text{CDCl}_3$ )  $\delta$  170.0, 169.9, 138.7, 130.3, 129.9, 129.6, 129.3, 128.9, 125.99, 125.96, 125.92, 125.88, 123.9 ( $\text{CF}_3$ ), 84.8 (C-1), 71.1 (C-2), 70.9 (C-4), 69.3 (C-3), 68.1 (C-5), 20.9, 20.8, 20.7, 17.3. HRMS (ESI-TOF) Calculated for  $\text{C}_{19}\text{H}_{22}\text{F}_3\text{O}_7\text{S}$   $[\text{M}+\text{H}]^+$  451.1038, found 451.1040.

#### 4-(trifluoromethyl)phenyl-2,3,4-tri-*O*-acetyl-1-thio- $\alpha$ -L-fucosepyranoside 19a

The reaction was carried out according to the general procedure, using glycosyl thiols **9** (92 mg, 0.3mmol), aryl triflates **2a** (110  $\mu\text{L}$ , 0.6 mmol), **Solution A** (1 mL), **Solution B** (2 mL) and DMF (1 mL) in 5 mL undivided three-necked bottle. The product was purified by silica chromatography. Compound **19a** (81.1 mg, 60% yield,  $\alpha$  only, PE:EA = 3:1,  $R_f = 0.3$ ) was obtained as white foam.

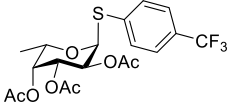  $[\alpha]_{\text{D}}^{25}$  40.0 ( $c = 0.50$ ,  $\text{CHCl}_3$ );  $^1\text{H}$  NMR (400 MHz,  $\text{CDCl}_3$ )  $\delta$  7.61 (d,  $J = 8.0$  Hz, 2H),  $\delta$  7.56 (d,  $J = 8.0$  Hz, 2H), 5.29 (d,  $J = 3.1$  Hz, 1H, H-4), 5.24 (t,  $J = 10.0$  Hz, 1H, H-3), 5.08 (dd,  $J_1 = 12.0$ ,  $J_2 = 4.0$  Hz, 1H, H-2), 4.78 (d,  $J = 12.0$  Hz, 1H, H-1), 3.93 – 3.86 (m, 1H, H-5), 2.15 (s, 3H), 2.08 (s, 3H), 1.98 (s, 3H), 1.26 (d,  $J = 6.4$  Hz, 3H).  $^{13}\text{C}$  NMR (100 MHz,  $\text{CDCl}_3$ )  $\delta$  170.5, 170.1, 169.5, 137.9, 131.4, 130.1, 129.8, 129.5, 129.1, 125.7, 125.62, 125.58, 125.55, 124.0 ( $\text{CF}_3$ ), 85.2 (C-1), 73.3 (C-5), 72.3 (C-3), 70.2 (C-4), 67.0 (C-2), 20.8, 20.6, 16.4. HRMS (ESI-TOF) Calculated for  $\text{C}_{19}\text{H}_{22}\text{F}_3\text{O}_7\text{S}$   $[\text{M}+\text{H}]^+$  451.1038, found 451.1034.

#### 2-cyanophenyl-2,3,4-tri-*O*-acetyl-1-thio- $\alpha$ -L-fucosepyranoside 19i

The reaction was carried out according to the general procedure, using glycosyl thiols **9** (92 mg,

0.3mmol), aryl triflates **2i** (129  $\mu$ L, 0.6 mmol), **Solution A** (1 mL), **Solution B** (2 mL) and DMF (1 mL) in 5 mL undivided three-necked bottle. The product was purified by silica chromatography. Compound **19i** (80.7 mg, 66% yield,  $\alpha$  only, PE:EA = 3:1,  $R_f$  = 0.3) was obtained as white foam.

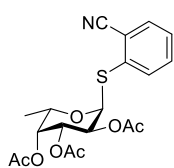

$[\alpha]_D^{25}$  33.7 ( $c$  = 0.50,  $\text{CHCl}_3$ );  $^1\text{H NMR}$  (400 MHz,  $\text{CDCl}_3$ )  $\delta$  7.88 (d,  $J$  = 8.0 Hz, 1H), 7.69 (dd,  $J_1$  = 7.7,  $J_2$  = 1.2 Hz, 1H), 7.61 – 7.54 (m, 1H), 7.49 – 7.39 (m, 1H), 5.28 (d,  $J$  = 2.7 Hz, 1H, H-4), 5.20 (t,  $J$  = 10.0 Hz, 1H, H-3), 5.07 (dd,  $J_1$  = 10.0,  $J_2$  = 4.0 Hz, 1H, H-2), 4.74 (d,  $J$  = 8.0 Hz, 1H, H-1), 3.90 – 3.74 (m, 1H, H-5), 2.15 (s, 3H), 2.14 (s, 3H), 1.97 (s, 3H), 1.25 (d,  $J$  = 6.4 Hz, 3H).  $^{13}\text{C NMR}$  (101 MHz,  $\text{CDCl}_3$ )  $\delta$  170.4, 170.0, 169.7, 136.3, 134.4, 133.7, 132.7, 128.7, 117.2, 117.0, 85.8 (C-1), 73.5 (C-5), 72.3 (C-3), 70.2 (C-4), 66.7 (C-2), 20.8, 20.63, 20.58, 16.4. HRMS (ESI-TOF) Calculated for  $\text{C}_{19}\text{H}_{22}\text{NO}_7\text{S}$   $[\text{M}+\text{H}]^+$  408.1117, found 408.1108.

#### 4-(trifluoromethyl)phenyl-2,3,6,2',3',4',6'-hepta-*O*-benzoyl-1-thio- $\beta$ -cellobioside **20a**

The reaction was carried out according to the general procedure, using glycosyl thiols **9** (195.7 mg, 0.3mmol), aryl triflates **2a** (110  $\mu$ L, 0.6 mmol), **Solution A** (1 mL), **Solution B** (2 mL) and DMF (1 mL) in 5 mL undivided three-necked bottle. The product was purified by silica chromatography. Compound **20a** (162.5 mg, 68% yield,  $\beta$  only, PE:EA = 3:1,  $R_f$  = 0.25) was obtained as white foam.

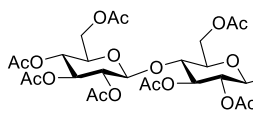

$[\alpha]_D^{25}$  -23.5 ( $c$  = 0.50,  $\text{CHCl}_3$ );  $^1\text{H NMR}$  (400 MHz,  $\text{CDCl}_3$ )  $\delta$  7.63 – 7.49 (m, 4H), 5.22 (t,  $J$  = 10.0 Hz, 1H), 5.15 (t,  $J$  = 10.0 Hz, 1H), 5.07 (t,  $J$  = 8.0 Hz, 1H), 4.98 – 4.88 (m, 2H), 4.73 (d,  $J$  = 8.0 Hz, 1H), 4.58 (d,  $J$  = 12.0 Hz, 1H), 4.50 (d,  $J$  = 8.0 Hz, 1H), 4.38 (dd,  $J_1$  = 12.0,  $J_2$  = 4.0 Hz, 1H), 4.10 (dd,  $J_1$  = 12.0,  $J_2$  = 4.0 Hz, 1H), 4.06 – 4.00 (m, 1H), 3.74 (t,  $J$  = 10.0 Hz, 1H), 3.70 – 3.61 (m, 2H), 2.11 (s, 3H), 2.09 (s, 3H), 2.07 (s, 3H), 2.03 (s, 3H), 2.02 (s, 3H), 2.01 (s, 3H), 1.98 (s, 3H).  $^{13}\text{C NMR}$  (100 MHz,  $\text{CDCl}_3$ )  $\delta$  170.5, 170.2, 170.1, 169.7, 169.52, 169.3, 169.0, 136.8, 132.3, 130.3, 130.0, 125.7, 125.6, 123.9 ( $\text{CF}_3$ ), 100.8, 84.6, 76.2, 73.4, 72.9, 72.02, 71.59, 70.0, 67.7, 61.9, 61.5, 20.8, 20.72, 20.6, 20.54, 20.50. HRMS (ESI-TOF) Calculated for  $\text{C}_{33}\text{H}_{40}\text{F}_3\text{O}_{17}\text{S}$   $[\text{M}+\text{H}]^+$  797.1938, found 797.1931.

#### 4-chlorophenyl-2,3,6,2',3',4',6'-hepta-*O*-benzoyl-1-thio- $\beta$ -maltobioside **21c**

The reaction was carried out according to the general procedure, using glycosyl thiols **9** (195.7 mg, 0.3mmol), aryl triflates **2c** (98  $\mu$ L, 0.6 mmol), **Solution A** (1 mL), **Solution B** (2 mL) and DMF (1 mL) in 5 mL undivided three-necked bottle. The product was purified by silica chromatography. Compound **21c** (162.5 mg, 68% yield,  $\beta$  only, PE:EA = 3:1,  $R_f$  = 0.25) was obtained as colorless oil.

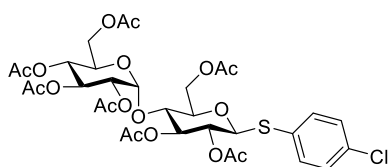

$[\alpha]_D^{25}$  74.2 ( $c$  = 0.50,  $\text{CHCl}_3$ );  $^1\text{H NMR}$  (400 MHz,  $\text{CDCl}_3$ )  $\delta$  7.59 – 7.55 (m, 1H), 7.42 (d,  $J$  = 8.0 Hz, 1H), 7.31 – 7.27 (m, 1H), 7.27 – 7.22 (m, 1H), 5.43 – 5.25 (m, 3H), 5.10 – 5.00 (m, 1H), 4.89 – 4.82 (m, 1H), 4.82 – 4.65 (m, 2H), 4.62 – 4.53 (m, 1H), 4.29 – 4.17 (m, 2H), 4.10 – 4.02 (m, 1H), 4.00 – 3.89 (m, 2H), 3.79 – 3.69 (m, 1H), 2.13 (d,  $J$  = 4.0 Hz, 3H), 2.10 (s, 3H), 2.07 (s, 3H), 2.04 – 2.02 (m, 6H), 2.01 – 1.98 (m, 6H).  $^{13}\text{C NMR}$  (100 MHz,  $\text{CDCl}_3$ )  $\delta$  170.6, 170.3, 170.1, 170.0, 169.6, 169.4, 135.3, 135.1, 132.1, 129.1, 121.8, 95.60, 95.56, 84.5, 84.4, 76.3, 76.2, 72.3, 70.6, 70.0, 69.3, 69.0, 68.5, 68.0, 62.6, 61.5, 20.90, 20.85, 20.8, 20.73, 20.69, 20.62, 20.60, 20.58. HRMS (ESI-TOF) Calculated for  $\text{C}_{32}\text{H}_{39}\text{ClO}_{17}\text{SK}$   $[\text{M}+\text{K}]^+$  801.1234, found 801.1210.

#### 6-cyclohex-1-en-2,3,4,6-tetra-*O*-acetyl-1-thio- $\beta$ -D-glucopyranoside **23a**

The reaction was carried out according to the general procedure, using glycosyl thiols **1** (109.3 mg,

0.3mmol), aryl triflates **22a** (105  $\mu$ L, 0.6 mmol), **Solution A** (1 mL), **Solution B** (2 mL) and DMF (1 mL) in 5 mL undivided three-necked bottle. The product was purified by silica chromatography. Compound **23a** (88 mg, 66% yield,  $\beta$  only, PE:EA = 5:1,  $R_f$  = 0.4) was obtained as white foam.

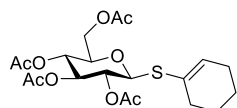

$[\alpha]_D^{25}$  18.6 (c = 0.50, CHCl<sub>3</sub>); <sup>1</sup>H NMR (400 MHz, CDCl<sub>3</sub>)  $\delta$  6.02 – 5.95 (m, 1H), 5.23 (t,  $J$  = 8.0 Hz, 1H, H-3), 5.07 (t,  $J$  = 10.0 Hz, 1H, H-4), 5.02 (t,  $J$  = 10.0 Hz, 1H, H-2), 4.65 (d,  $J$  = 12.0 Hz, 1H, H-1), 4.22 (dd,  $J_1$  = 12.0,  $J_2$  = 8.0 Hz, 1H, H-6a), 4.15 (dd,  $J_1$  = 12.0,  $J_2$  = 4.0 Hz, 1H, H-6b), 3.80 – 3.55 (m, 1H, H-5), 2.26 – 2.09 (m, 4H), 2.07 (s, 3H), 2.05 (s, 3H), 2.03 (s, 3H), 2.01 (s, 3H), 1.74 – 1.64 (m, 2H), 1.63 – 1.55 (m, 2H). <sup>13</sup>C NMR (100 MHz, CDCl<sub>3</sub>)  $\delta$  170.6, 170.2, 169.4, 169.3, 132.0, 129.4, 84.2 (C-1), 75.8 (C-5), 74.1 (C-3), 69.9 (C-2), 68.3 (C-4), 62.3 (C-6), 31.4, 26.7, 23.4, 21.5, 20.8, 20.7, 20.62, 20.59. HRMS (ESI-TOF) Calculated for C<sub>20</sub>H<sub>28</sub>O<sub>9</sub>SNa [M+Na]<sup>+</sup> 467.1346, found 467.1342.

#### (1H-inden-2-yl)-2,3,4,6-tetra-O-acetyl-1-thio- $\beta$ -D-glucopyranoside **23b**

The reaction was carried out according to the general procedure, using glycosyl thiols **1** (109.3 mg, 0.3mmol), aryl triflates **22b** (113.2  $\mu$ L, 0.6 mmol), **Solution A** (1 mL), **Solution B** (2 mL) and DMF (1 mL) in 5 mL undivided three-necked bottle. The product was purified by silica chromatography. Compound **23b** (81.8 mg, 57% yield,  $\beta$  only, PE:EA = 5:1,  $R_f$  = 0.4) was obtained as white foam.

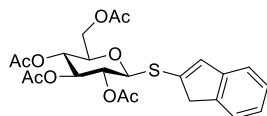

$[\alpha]_D^{25}$  148.0 (c = 0.50, CHCl<sub>3</sub>); <sup>1</sup>H NMR (400 MHz, CDCl<sub>3</sub>)  $\delta$  7.38 (d,  $J$  = 8.0 Hz, 1H), 7.30 (d,  $J$  = 8.0 Hz, 1H), 7.24 (d,  $J$  = 8.0 Hz, 1H), 7.16 (t,  $J$  = 6.0 Hz, 1H), 6.90 (s, 1H), 5.27 (t,  $J$  = 8.0 Hz, 1H, H-3), 5.15 – 5.04 (m, 2H, H-2, H-4), 4.78 (d,  $J$  = 12.0 Hz, 1H, H-1), 4.25 (dd,  $J_1$  = 12.0,  $J_2$  = 8.0 Hz, 1H, H-6a), 4.19 (dd,  $J_1$  = 12.3,  $J_2$  = 2.4 Hz, 1H, H-6b), 3.80 (m,  $J$  = 10.0, 1H, H-5), 3.66 – 3.47 (m, 2H), 2.08 (s, 3H), 2.07 (s, 3H), 2.04 (s, 3H), 2.00 (s, 3H). <sup>13</sup>C NMR (100 MHz, CDCl<sub>3</sub>)  $\delta$  170.5, 170.2, 169.4, 169.3, 144.1, 143.4, 136.9, 133.5, 126.7, 124.9, 123.3, 120.4, 84.1 (C-1), 75.9 (C-5), 73.8 (C-3), 69.9 (C-2), 68.2 (C-4), 62.2 (C-6), 43.7, 20.7, 20.6. HRMS (ESI-TOF) Calculated for C<sub>20</sub>H<sub>28</sub>O<sub>9</sub>S [M+Na]<sup>+</sup> 467.1346, found 467.1342.

#### (2R,3R,4S,5R,6S)-2-(acetoxymethyl)-6-(((3S)-6-isopropyl-3-methylcyclohex-1-en-1-yl)thio)tetrahydro-2H-pyran-3,4,5-triyl triacetate **23c**

The reaction was carried out according to the general procedure, using glycosyl thiols **1** (109.3 mg, 0.3mmol), aryl triflates **22c** (98  $\mu$ L, 0.6 mmol), **Solution A** (1 mL), **Solution B** (2 mL) and DMF (1 mL) in 5 mL undivided three-necked bottle. The product was purified by silica chromatography. Compound **23c** (123.1 mg, 82% yield,  $\beta$  only, PE:EA = 5:1,  $R_f$  = 0.4) was obtained as white foam.

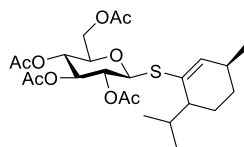

$[\alpha]_D^{25}$  58.6 (c = 0.50, CHCl<sub>3</sub>); <sup>1</sup>H NMR (400 MHz, CDCl<sub>3</sub>)  $\delta$  5.98 (d,  $J$  = 1.3 Hz, 1H), 5.23 (t,  $J$  = 10.0 Hz, 1H), 5.13 – 4.89 (m, 2H), 4.54 (d,  $J$  = 12.0 Hz, 1H), 4.23 (dd,  $J_1$  = 12.0,  $J_2$  = 8.0 Hz, 1H), 4.12 (dd,  $J_1$  = 12.0,  $J_2$  = 4.0 Hz, 1H), 3.78 – 3.64 (m, 1H), 2.45 – 2.27 (m, 1H), 2.26 – 2.11 (m, 2H), 2.08 (s, 3H), 2.05 (s, 3H), 2.03 (s, 3H), 2.00 (s, 3H), 1.86 – 1.77 (m, 1H), 1.77 – 1.68 (m, 1H), 1.43 – 1.30 (m, 1H), 1.18 – 1.04 (m, 1H), 1.00 (d,  $J$  = 7.0 Hz, 3H), 0.92 (d,  $J$  = 6.9 Hz, 3H), 0.70 (d,  $J$  = 6.8 Hz, 3H). <sup>13</sup>C NMR (100 MHz, CDCl<sub>3</sub>)  $\delta$  170.5, 170.2, 169.4, 169.1, 141.2, 134.4, 85.5, 75.8, 74.2, 69.7, 68.3, 62.4, 45.1, 32.6, 30.6, 28.2, 22.2, 21.7, 20.70, 20.67, 20.57, 20.55, 20.5, 15.6. HRMS (ESI-TOF) Calculated for C<sub>24</sub>H<sub>37</sub>O<sub>9</sub>S [M+H]<sup>+</sup> 501.2153, found 501.2153.

#### (6,7-dihydro-5H-benzo[7]annulen-9-yl) -2,3,4,6-tetra-O-acetyl-1-thio- $\beta$ -D-glucopyranoside **23d**

The reaction was carried out according to the general procedure, using glycosyl thiols **1** (109.3 mg, 0.3mmol), aryl triflates **22d** (125.2  $\mu$ L, 0.6 mmol), **Solution A** (1 mL), **Solution B** (2 mL) and DMF

(1 mL) in 5 mL undivided three-necked bottle. The product was purified by silica chromatography.

Compound **23d** (88.1 mg, 58% yield,  $\beta$  only, PE:EA = 5:1,  $R_f$  = 0.4) was obtained as white foam.

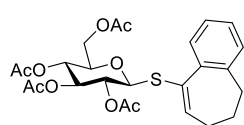

$[\alpha]_D^{25}$  99.0 ( $c$  = 0.50,  $\text{CHCl}_3$ );  $^1\text{H NMR}$  (400 MHz,  $\text{CDCl}_3$ )  $\delta$  7.55 (d,  $J$  = 8.0 Hz, 1H), 7.31 – 7.27 (m, 1H), 7.26 – 7.20 (m, 2H), 6.63 (t,  $J$  = 8.0 Hz, 1H), 5.18 – 4.92 (m, 3H, H-3, H-2, H-4), 4.36 (d,  $J$  = 8.0 Hz, 1H, H-1), 4.11 (dd,  $J_1$  = 12.0,  $J_2$  = 4.0 Hz, 1H, H-6a), 4.00 (dd,  $J_1$  = 12.0,  $J_2$  = 4.0 Hz, 1H, H-6b), 3.44 – 3.28 (m, 1H, H-5), 2.73 – 2.54 (m, 2H), 2.22 – 2.13 (m, 2H), 2.10 (s, 3H), 2.07 (s, 3H), 1.98 (s, 3H), 1.97 (s, 3H), 1.96 – 1.90 (m, 1H), 1.87 – 1.75 (m, 1H).  $^{13}\text{C NMR}$  (100 MHz,  $\text{CDCl}_3$ )  $\delta$  170.6, 170.2, 169.3, 142.0, 137.6, 135.9, 132.1, 128.9, 128.1, 127.9, 126.3, 84.1 (C-1), 75.7 (C-5), 73.9 (C-3), 70.1 (C-2), 68.3 (C-4), 62.2 (C-6), 35.5, 32.1, 25.8, 20.74, 20.72, 20.6, 20.5. HRMS (ESI-TOF) Calculated for  $\text{C}_{25}\text{H}_{31}\text{O}_9\text{S}$   $[\text{M}+\text{H}]^+$  507.1684, found 507.1683.

### 1-((3S,5S,7S)-adamantan-1-yl)vinyl-2,3,4,6-tetra-O-acetyl-1-thio- $\beta$ -D-glucopyranoside **23e**

The reaction was carried out according to the general procedure, using glycosyl thiols **1** (109.3 mg, 0.3mmol), aryl triflates **22e** (132.9  $\mu\text{L}$ , 0.6 mmol), **Solution A** (1 mL), **Solution B** (2 mL) and DMF (1 mL) in 5 mL undivided three-necked bottle. The product was purified by silica chromatography. Compound **23e** (70.8 mg, 45% yield,  $\beta$  only, PE:EA = 5:1,  $R_f$  = 0.4) was obtained as white foam.

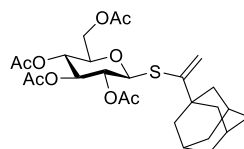

$[\alpha]_D^{25}$  102.0 ( $c$  = 0.50,  $\text{CHCl}_3$ );  $^1\text{H NMR}$  (400 MHz,  $\text{CDCl}_3$ )  $\delta$  5.29 – 5.19 (m, 3H, H-3), 5.09 (t,  $J$  = 8.0 Hz, 2H, H-4, H-2), 4.62 (d,  $J$  = 12.0 Hz, 1H, H-1), 4.26 – 4.18 (m, 1H, H-6a), 4.14 (d,  $J$  = 12.3 Hz, 1H, H-6b), 3.77 – 3.69 (m, 1H, H-5), 2.11 – 2.06 (m, 6H), 2.05 – 1.98 (m, 9H), 1.84 – 1.69 (m, 7H), 1.67 – 1.56 (m, 5H).  $^{13}\text{C NMR}$  (100 MHz,  $\text{CDCl}_3$ )  $\delta$  170.7, 170.3, 169.4, 155.5, 110.9, 87.0 (C-1), 75.7 (C-5), 74.0 (C-3), 70.0 (C-2), 68.4 (C-4), 62.4 (C-6), 41.1, 39.8, 38.3, 36.6, 36.6, 28.5, 28.0, 20.8, 20.7, 20.6. HRMS (ESI-TOF) Calculated for  $\text{C}_{26}\text{H}_{36}\text{O}_9\text{SNa}$   $[\text{M}+\text{Na}]^+$  547.1972, found 547.1935.

### ((8S,9S,10R,13R,14S,17R)-10,13-dimethyl-17-((S)-6-methylheptan-2-yl)-2,7,8,9,10,11,12,13,14,15,16,17-dodecahydro-1H-cyclopenta[a]phenanthren-3-yl)-2,3,4,6-tetra-O-acetyl-1-thio- $\beta$ -D-glucopyranoside **23f**

The reaction was carried out according to the general procedure, using glycosyl thiols **1** (109.3 mg, 0.3mmol), aryl triflates **22f** (310 mg, 0.6 mmol), **Solution A** (1 mL), **Solution B** (2 mL) and DMF (1 mL) in 5 mL undivided three-necked bottle. The product was purified by silica chromatography. Compound **23f** (146.9 mg, 67% yield,  $\beta$  only, PE:EA = 5:1,  $R_f$  = 0.4) was obtained as white foam.

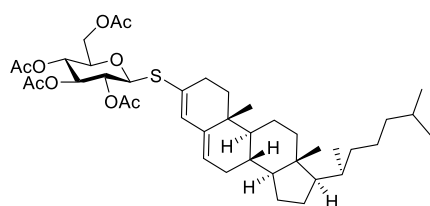

$[\alpha]_D^{25}$  126.0 ( $c$  = 0.50,  $\text{CHCl}_3$ );  $^1\text{H NMR}$  (400 MHz,  $\text{CDCl}_3$ )  $\delta$  6.16 (d,  $J$  = 1.6 Hz, 1H), 5.46 – 5.39 (m, 1H), 5.24 (t,  $J$  = 10.0 Hz, 1H, H-3), 5.09 – 5.04 (m, 1H, H-4), 5.04 – 4.99 (m, 1H, H-2), 4.71 (d,  $J$  = 8.0 Hz, 1H, H-1), 4.22 (dd,  $J_1$  = 12.0,  $J_2$  = 4.0 Hz, 1H, H-6a), 4.14 (dd,  $J_1$  = 12.0,  $J_2$  = 2.2 Hz, 1H, H-6b), 3.80 – 3.72 (m, 1H, H-5), 2.41 (t,  $J$  = 10.0 Hz, 1H), 2.29 – 2.13 (m, 2H), 2.07 (s, 3H), 2.06 (s, 3H), 2.02 (d,  $J$  = 12.0 Hz, 6H), 1.85 – 1.81 (m, 2H), 1.74 – 1.47 (m, 5H), 1.46 – 1.31 (m, 4H), 1.30 – 1.20 (m, 3H), 1.19 – 0.97 (m, 9H), 0.96 – 0.90 (m, 6H), 0.87 (dd,  $J_1$  = 8.0,  $J_2$  = 4.0 Hz, 6H), 0.70 (s, 3H).  $^{13}\text{C NMR}$  (100 MHz,  $\text{CDCl}_3$ )  $\delta$  170.6, 170.2, 169.4, 169.2, 141.2, 131.86, 127.3, 125.3, 84.0 (C-1), 75.8 (C-5), 74.0 (C-3), 70.0 (C-2), 68.3 (C-4), 62.4 (C-6), 56.8, 56.1, 48.0, 42.4, 39.7, 39.5, 36.2, 35.8, 34.52, 34.50, 31.8, 31.7, 29.0, 28.2, 28.0, 24.2, 23.8, 22.8, 22.6, 21.1, 20.7, 20.59, 20.57, 19.0, 18.7, 12.0. HRMS (ESI-TOF) Calculated for  $\text{C}_{41}\text{H}_{63}\text{O}_9\text{S}$   $[\text{M}+\text{H}]^+$  731.4188, found 731.4183.



**((13S)-13-methyl-1,2,4,6,7,8,12,13,14,15-decahydrospiro[cyclopenta[a]phenanthrene-3,2'-[1,3]dioxolan]-17-yl)-2,3,4,6-tetra-O-acetyl-1-thio-β-D-glucopyranoside 23g**

The reaction was carried out according to the general procedure, using glycosyl thiols **1** (109.3 mg, 0.3mmol), aryl triflates **22g** (267 mg, 0.6 mmol), **Solution A** (1 mL), **Solution B** (2 mL) and DMF (1 mL) in 5 mL undivided three-necked bottle. The product was purified by silica chromatography. Compound **23g** (166.5 mg, 84% yield, β only, PE:EA = 5:1, R<sub>f</sub> = 0.4) was obtained as white foam.

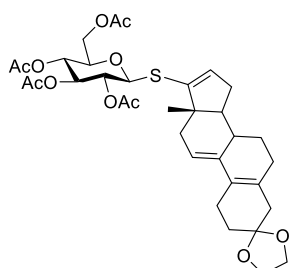

$[\alpha]_D^{25}$  10.6 (c = 0.50, CHCl<sub>3</sub>); <sup>1</sup>H NMR (400 MHz, CDCl<sub>3</sub>) δ 5.75 (d, *J* = 1.1 Hz, 1H), 5.54 (s, 1H), 5.25 (t, *J* = 10.0 Hz, 1H, H-3), 5.13 (t, 1H, *J* = 6.0 Hz, H-2), 5.09 (t, *J* = 6.0 Hz, 1H, H-4), 4.72 (d, *J* = 8.0 Hz, 1H, H-1), 4.24 (dd, *J*<sub>1</sub> = 12.3, *J*<sub>2</sub> = 5.4 Hz, 1H, H-6a), 4.14 (dd, *J*<sub>1</sub> = 12.0, *J*<sub>2</sub> = 4.0 Hz, 1H, H-6b), 3.99 (s, 4H), 3.85 – 3.69 (m, 1H, H-5), 2.56 – 2.46 (m, 1H), 2.39 – 2.26 (m, 3H), 2.26 – 2.16 (m, 3H), 2.15 – 2.09 (m, 2H), 2.07 (s, 3H), 2.06 (s, 3H), 2.03 (s, 6H), 1.99 – 1.72 (m, 5H), 1.71 – 1.61 (m, 1H), 1.34 – 1.22 (m, 1H), 0.79 (s, 3H). <sup>13</sup>C NMR (100 MHz, CDCl<sub>3</sub>) δ 170.5, 170.2, 169.4, 169.3, 143.9, 137.7, 130.3, 127.9, 126.2, 117.3, 108.0, 84.1(C-1), 75.8 (C-5), 74.0 (C-3), 69.6 (C-2), 68.2 (C-4), 64.4, 64.3, 62.2 (C-6), 52.2, 47.3, 41.3, 37.0, 36.4, 32.5, 31.3, 30.9, 27.6, 24.6, 20.7, 20.59, 20.56, 16.4. HRMS (ESI-TOF) Calculated for C<sub>34</sub>H<sub>45</sub>O<sub>11</sub>S [M+H]<sup>+</sup> 661.2677, found 661.2675.

**((8R,9R,12S,14R)-12-methyl-3-(((trifluoromethyl)sulfonyl)oxy)-7,8,9,11,12,13,14,15-octahydro-6H-cyclopenta[a]phenanthren-17-yl)-2,3,4,6-tetra-O-acetyl-1-thio-β-D-glucopyranoside 23h**

The reaction was carried out according to the general procedure, using glycosyl thiols **1** (109.3 mg, 0.3mmol), aryl triflates **22h** (320.7 mg, 0.6 mmol), **Solution A** (1 mL), **Solution B** (2 mL) and DMF (1 mL) in 5 mL undivided three-necked bottle. The product was purified by silica chromatography. Compound **23h** (172.9 mg, 77% yield, β only, PE:EA = 5:1, R<sub>f</sub> = 0.4) was obtained as white foam.

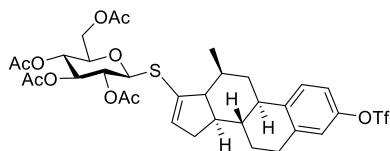

$[\alpha]_D^{25}$  69.0 (c = 0.50, CHCl<sub>3</sub>); <sup>1</sup>H NMR (400 MHz, CDCl<sub>3</sub>) δ 7.32 (d, *J* = 12.0 Hz, 1H), 7.02 (dd, *J*<sub>1</sub> = 8.0, *J*<sub>2</sub> = 4.0 Hz 1H), 6.98 (d, *J* = 2.5 Hz, 1H), 5.81 – 5.64 (m, 1H), 5.26 (t, *J* = 10.0 Hz, 1H, H-3), 5.16 (t, *J* = 8.0 Hz, 1H, H-2), 5.11 (t, *J* = 8.0 Hz, 1H, H-4), 4.72 (d, *J* = 8.0 Hz, 1H, H-1), 4.26 (dd, *J*<sub>1</sub> = 12.0, *J*<sub>2</sub> = 4.0 Hz, 1H, H-6a), 4.14 (dd, *J*<sub>1</sub> = 12.0, *J*<sub>2</sub> = 2.1 Hz, 1H, H-6b), 3.79 – 3.67 (m, 1H, H-5), 2.99 – 2.88 (m, 2H), 2.39 – 2.25 (m, 3H), 2.08 (s, 3H), 2.07 (s, 3H), 2.04 (s, 3H), 2.02 (s, 3H), 1.99 – 1.88 (m, 2H), 1.71 – 1.59 (m, 3H), 1.59 – 1.39 (m, 3H), 0.86 (s, 3H). <sup>13</sup>C NMR (100 MHz, CDCl<sub>3</sub>) δ 170.6, 170.3, 169.5, 169.3, 147.5, 145.3, 140.8, 139.4, 127.6, 126.9, 121.2, 118.7 (CF<sub>3</sub>), 118.2, 84.1 (C-1), 76.0 (C-5), 74.1 (C-3), 69.6 (C-4), 68.2 (C-2), 62.2 (C-6), 55.5, 48.8, 44.3, 36.8, 34.4, 31.8, 29.4, 27.1, 26.1, 20.8, 20.7, 20.6, 16.1. HRMS (ESI-TOF) Calculated for C<sub>33</sub>H<sub>40</sub>F<sub>3</sub>O<sub>12</sub>S<sub>2</sub> [M+H]<sup>+</sup> 749.1908, found 749.1904.

**((8S,9S,10R,13R,14S,17R)-10,13-dimethyl-17-((S)-6-methylheptan-2-yl)-2,7,8,9,10,11,12,13,14,15,16,17-dodecahydro-1H-cyclopenta[a]phenanthren-3-yl)-2,3,4,6-tetra-O-benzoyl-1-thio-β-D-glucopyranoside 24f**

The reaction was carried out according to the general procedure, using glycosyl thiols **3** (183 mg, 0.3mmol), aryl triflates **22f** (310 mg, 0.6 mmol), **Solution A** (1 mL), **Solution B** (2 mL) and DMF (1 mL) in 5 mL undivided three-necked bottle. The product was purified by silica chromatography. Compound **24f** (196.8 mg, 67% yield, β only, PE:EA = 5:1, R<sub>f</sub> = 0.4) was obtained as white foam.

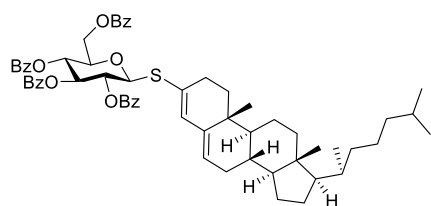

$[\alpha]_D^{25}$  33.0 ( $c = 0.50$ ,  $\text{CHCl}_3$ );  $^1\text{H NMR}$  (400 MHz,  $\text{CDCl}_3$ )  $\delta$  7.97 (d,  $J = 8.0$  Hz, 2H), 7.88 (d,  $J = 8.0$  Hz, 2H), 7.85 (d,  $J = 8.0$  Hz, 2H), 7.74 (d,  $J = 8.0$  Hz, 2H), 7.52 – 7.40 (m, 3H), 7.38 – 7.29 (m, 6H), 7.23 – 7.17 (m, 3H), 6.05 (s, 1H), 5.86 (t,  $J = 10.0$  Hz, 1H, H-3), 5.55 (t,  $J = 10.0$  Hz, 1H, H-4), 5.47 (t,  $J = 10.0$  Hz, 1H, H-2), 5.18 (s, 1H), 4.96 (d,  $J = 8.0$  Hz, 1H, H-1),

4.58 (dd,  $J_1 = 12.0$ ,  $J_2 = 4.0$  Hz, 1H, H-6a), 4.41 (dd,  $J_1 = 12.0$ ,  $J_2 = 8.0$  Hz, 1H, H-6b), 4.21 – 4.11 (m, 1H, H-5), 2.35 – 2.22 (m, 1H), 2.20 – 2.12 (m, 1H), 2.06 – 1.91 (m, 2H), 1.82 – 1.71 (m, 1H), 1.53 – 1.41 (m, 6H), 1.37 – 1.23 (m, 5H), 1.23 – 1.17 (m, 2H), 1.11 – 1.01 (m, 5H), 0.97 – 0.91 (m, 2H), 0.89 – 0.74 (m, 13H), 0.62 (s, 3H).  $^{13}\text{C NMR}$  (100 MHz,  $\text{CDCl}_3$ )  $\delta$  165.1, 164.8, 164.2, 164.1, 140.1, 132.5, 132.3, 132.2, 132.1, 131.1, 128.89, 128.85, 128.8, 128.7, 128.6, 128.2, 127.8, 127.7, 127.42, 127.35, 127.3, 126.5, 124.3, 83.9 (C-1), 75.3 (C-5), 73.2 (C-3), 69.6 (C-2), 68.6 (C-4), 62.5 (C-6), 55.8, 55.1, 46.9, 41.4, 38.7, 38.5, 35.2, 34.8, 33.4, 30.8, 30.7, 28.1, 27.2, 27.0, 23.1, 22.8, 21.8, 21.6, 20.0, 17.8, 17.7, 10.9. HRMS (ESI-TOF) Calculated for  $\text{C}_{61}\text{H}_{71}\text{O}_9\text{S}$   $[\text{M}+\text{H}]^+$  979.4814, found 979.4811.

**((8S,9S,10R,13R,14S,17R)-10,13-dimethyl-17-((S)-6-methylheptan-2-yl)-2,7,8,9,10,11,12,13,14,15,16,17-dodecahydro-1H-cyclopenta[a]phenanthren-3-yl)-2,3,4,6-tetra-O-acetyl-1-thio-β-D-galactopyranoside 25f**

The reaction was carried out according to the general procedure, using glycosyl thiols **3** (183 mg, 0.3mmol), aryl triflates **22f** (310 mg, 0.6 mmol), **Solution A** (1 mL), **Solution B** (2 mL) and DMF (1 mL) in 5 mL undivided three-necked bottle. The product was purified by silica chromatography. Compound **25f** (153.51 mg, 70% yield,  $\beta$  only, PE:EA = 5:1,  $R_f = 0.4$ ) was obtained as white foam.

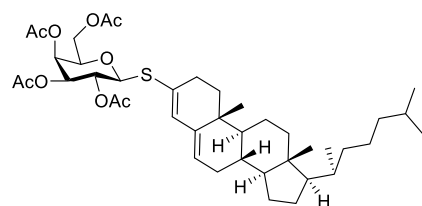

$[\alpha]_D^{25}$  -12.1 ( $c = 0.50$ ,  $\text{CHCl}_3$ );  $^1\text{H NMR}$  (400 MHz,  $\text{CDCl}_3$ )  $\delta$  6.19 (d,  $J = 4.0$  Hz, 1H), 5.44 (d,  $J = 4.0$  Hz, 2H, H-4), 5.25 (t,  $J = 10.0$  Hz, 1H, H-3), 5.06 (dd,  $J_1 = 12.0$ ,  $J_2 = 4.0$  Hz, 1H, H-2), 4.69 (d,  $J = 10.0$  Hz, 1H, H-1), 4.23 – 4.08 (m, 2H, H-6), 3.96 (t,  $J = 6.0$  Hz, 1H, H-5), 2.44 (t,  $J = 12.0$  Hz, 1H), 2.29 – 2.13 (m, 5H), 2.07 (s, 3H), 2.05 (s, 3H), 2.02 – 1.96 (m, 4H),

1.88 – 1.81 (m, 2H), 1.74 – 1.50 (m, 5H), 1.44 – 1.32 (m, 3H), 1.30 – 1.21 (m, 3H), 1.19 – 1.05 (m, 7H), 1.01 – 0.95 (m, 5H), 0.92 (d,  $J = 8.0$  Hz, 3H), 0.87 (dd,  $J_1 = 8.0$ ,  $J_2 = 4.0$  Hz, 6H), 0.70 (s, 3H).  $^{13}\text{C NMR}$  (100 MHz,  $\text{CDCl}_3$ )  $\delta$  170.4, 170.2, 170.1, 169.4, 141.2, 132.4, 127.1, 125.4, 84.5 (C-1), 74.5 (C-5), 72.0 (C-2), 67.4 (C-4), 67.2 (C-3), 61.9 (C-6), 56.8, 56.1, 48.0, 42.4, 39.7, 39.5, 36.2, 35.8, 34.6, 34.5, 31.8, 31.7, 29.2, 28.2, 28.0, 24.2, 23.8, 22.8, 22.6, 21.1, 20.9, 20.71, 20.69, 20.6, 19.0, 18.7, 12.0. HRMS (ESI-TOF) Calculated for  $\text{C}_{41}\text{H}_{63}\text{O}_9\text{S}$   $[\text{M}+\text{H}]^+$  731.4188, found 731.4191.

**((13S)-13-methyl-1,2,4,6,7,8,12,13,14,15-decahydrospiro[cyclopenta[a]phenanthrene-3,2'-[1,3]dioxolan]-17-yl)-2,3,4,6-tetra-O-benzoyl-1-thio-β-D-galactopyranoside 26g**

The reaction was carried out according to the general procedure, using glycosyl thiols **9** (183 mg, 0.3mmol), aryl triflates **22g** (267 mg, 0.6 mmol), **Solution A** (1 mL), **Solution B** (2 mL) and DMF (1 mL) in 5 mL undivided three-necked bottle. The product was purified by silica chromatography. Compound **26g** (166.3 mg, 92% yield,  $\beta$  only, PE:EA = 5:1,  $R_f = 0.4$ ) was obtained as white foam.

$[\alpha]_D^{25}$  167.0 ( $c = 0.50$ ,  $\text{CHCl}_3$ );  $^1\text{H NMR}$  (600 MHz,  $\text{CDCl}_3$ )  $\delta$  8.10 – 8.06 (m, 2H), 8.05 – 7.99 (m, 2H), 7.98 – 7.92 (m, 2H), 7.83 – 7.76 (m, 2H), 7.62 (t,  $J = 7.5$  Hz, 2H), 7.56 (t,  $J = 7.4$  Hz, 1H), 7.53 – 7.46 (m, 3H), 7.45 – 7.35 (m, 5H), 7.26 – 7.24 (m, 1H), 6.04 (d,  $J = 3.4$  Hz, 1H), 6.01 – 5.87 (m, 2H), 5.64 (dd,  $J_1 = 10.0$ ,  $J_2 = 3.4$  Hz, 1H), 5.47 (d,  $J = 5.3$  Hz, 1H), 5.06 (d,  $J = 10.0$  Hz, 1H), 4.70 – 4.57 (m, 1H),

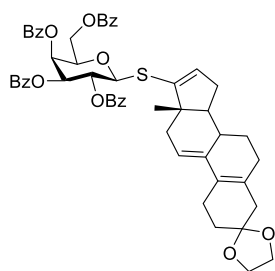

4.46 (dd,  $J_1 = 11.5$ ,  $J_2 = 5.6$  Hz, 1H), 4.39 (t,  $J = 6.4$  Hz, 1H), 3.98 (d,  $J = 2.5$  Hz, 4H), 2.47 (d,  $J = 16.7$  Hz, 1H), 2.29 (s, 3H), 2.24 – 2.15 (m, 3H), 2.14 – 2.08 (m, 2H), 2.08 – 1.90 (m, 2H), 1.88 – 1.71 (m, 3H), 1.68 – 1.61 (m, 1H), 1.35 – 1.16 (m, 1H), 0.77 (s, 3H).  $^{13}\text{C}$  NMR (150 MHz,  $\text{CDCl}_3$ )  $\delta$  167.5, 167.03, 166.99, 166.8, 145.3, 139.0, 135.1, 134.8, 134.7, 131.6, 131.5, 131.3, 130.9, 130.7, 130.4, 130.2, 130.1, 129.90, 129.86, 129.8, 129.6, 127.8, 119.0, 109.5, 86.2, 76.8, 74.4, 70.0, 69.1, 65.9, 65.8, 64.1, 53.6, 48.9, 42.8, 38.6, 37.9, 33.9, 32.7, 32.4, 29.1, 26.1, 18.1. HRMS (ESI-TOF) Calculated for  $\text{C}_{54}\text{H}_{52}\text{O}_{11}\text{SNa}$   $[\text{M}+\text{Na}]^+$  931.3122, found 931.3121.

**((13S)-13-methyl-1,2,4,6,7,8,12,13,14,15-decahydrospiro[cyclopenta[a]phenanthrene-3,2'-[1,3]dioxolan]-17-yl) -2,3,4-tri-O-acetyl-1-thio- $\alpha$ -L-fucosepyranoside 27g**

The reaction was carried out according to the general procedure, using glycosyl thiols **9** (92 mg, 0.3mmol), aryl triflates **22g** (267 mg, 0.6 mmol), **Solution A** (1 mL), **Solution B** (2 mL) and DMF (1 mL) in 5 mL undivided three-necked bottle. The product was purified by silica chromatography. Compound **27g** (166.3 mg, 92% yield,  $\alpha$  only, PE:EA = 5:1,  $R_f = 0.4$ ) was obtained as white foam.

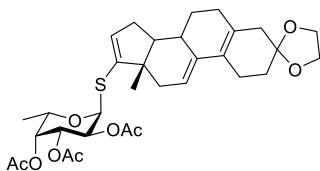

$[\alpha]_{\text{D}}^{25}$  133.2 ( $c = 0.50$ ,  $\text{CHCl}_3$ );  $^1\text{H}$  NMR (400 MHz,  $\text{CDCl}_3$ )  $\delta$  5.74 – 5.68 (m, 1H), 5.54 (d,  $J = 4.0$  Hz, 1H), 5.36 – 5.27 (m, 2H, H-2, H-4), 5.07 (dd,  $J_1 = 12.0$ ,  $J_2 = 4.0$  Hz, 1H, H-3), 4.70 (d,  $J = 12.0$  Hz, 1H, H-1), 3.99 (s, 4H), 3.91 – 3.83 (m, 1H, H-5), 2.53 (d,  $J = 12.0$  Hz, 1H), 2.40 – 2.31 (m, 1H), 2.30 – 2.15 (m, 8H), 2.13 – 2.03 (m, 5H), 2.02 – 1.90 (m, 5H), 1.89 – 1.64 (m, 4H), 1.36 – 1.30 (m, 1H), 1.26 (dd,  $J_1 = 12.0$ ,  $J_2 = 8.0$  Hz, 3H), 0.82 (s, 3H).  $^{13}\text{C}$  NMR (100 MHz,  $\text{CDCl}_3$ )  $\delta$  170.6, 170.1, 169.6, 145.2, 137.6, 130.2, 126.3, 124.9, 117.4, 108.1, 85.1 (C-1), 73.2(C-5), 72.3(C-3), 70.3(C-4), 67.1(C-2), 64.5, 64.3, 52.1, 47.3, 41.3, 36.6, 36.4, 32.4, 31.3, 31.0, 27.6, 24.6, 20.8, 20.7, 20.6, 16.5, 16.4. HRMS (ESI-TOF) Calculated for  $\text{C}_{32}\text{H}_{43}\text{O}_9\text{S}$   $[\text{M}+\text{H}]^+$  603.2623, found 603.2616.

**((13S)-13-methyl-1,2,4,6,7,8,12,13,14,15-decahydrospiro[cyclopenta[a]phenanthrene-3,2'-[1,3]dioxolan]-17-yl)-2,3,4-tri-O-acetyl-1-thio- $\alpha$ -L-rhamnopyranoside 28g**

The reaction was carried out according to the general procedure, using glycosyl thiols **8** (92 mg, 0.3mmol), aryl triflates **22g** (267 mg, 0.6 mmol), **Solution A** (1 mL), **Solution B** (2 mL) and DMF (1 mL) in 5 mL undivided three-necked bottle. The product was purified by silica chromatography. Compound **28g** (139.2 mg, 77% yield,  $\beta$  only, PE:EA = 5:1,  $R_f = 0.4$ ) was obtained as white foam.

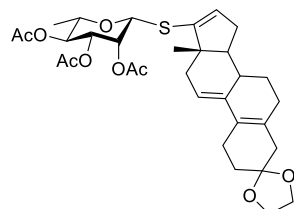

$[\alpha]_{\text{D}}^{25}$  22.4 ( $c = 0.50$ ,  $\text{CHCl}_3$ );  $^1\text{H}$  NMR (400 MHz,  $\text{CDCl}_3$ )  $\delta$  5.71 (d,  $J = 1.1$  Hz, 1H), 5.56 (s, 1H), 5.44 (d,  $J = 1.1$  Hz, 1H, H-1), 5.41 (dd,  $J_1 = 3.3$ ,  $J_2 = 1.5$  Hz, 1H, H-2), 5.28 (dd,  $J_1 = 12.0$ ,  $J_2 = 4.0$  Hz, 1H, H-3), 5.10 (t,  $J = 10.0$  Hz, 1H, H-4), 4.24 – 4.12 (m, 1H, H-5), 3.99 (s, 4H), 2.53 (d,  $J = 16.0$  Hz, 1H), 2.36 – 2.25 (m, 4H), 2.24 – 2.18 (m, 2H), 2.19 – 2.12 (m, 5H), 2.06 (s, 3H), 2.02 – 1.91 (m, 5H), 1.88 – 1.76 (m, 3H), 1.71 – 1.60 (m, 1H), 1.29 – 1.17 (m, 4H), 0.81 (s, 3H).  $^{13}\text{C}$  NMR (100 MHz,  $\text{CDCl}_3$ )  $\delta$  170.03, 170.00, 169.9, 143.9, 137.7, 130.2, 126.5, 126.3, 117.5, 108.1, 82.4 (C-1), 71.4 (C-2), 71.3 (C-4), 69.4 (C-3), 67.7 (C-5), 64.5, 64.3, 52.1, 47.5, 41.3, 37.1, 36.4, 32.5, 31.3, 31.0, 27.6, 24.6, 21.0, 20.8, 20.7, 17.5, 16.5. HRMS (ESI-TOF) Calculated for  $\text{C}_{32}\text{H}_{43}\text{O}_9\text{S}$   $[\text{M}+\text{H}]^+$  603.2623, found 603.2632.

**((13S)-13-methyl-1,2,4,6,7,8,12,13,14,15-decahydrospiro[cyclopenta[a]phenanthrene-3,2'-[1,3]dioxolan]-17-yl)-2,3,6,2',3',4',6'-hepta-O-benzoyl-1-thio- $\beta$ -cellobioside 29g**

The reaction was carried out according to the general procedure, using glycosyl thiols **9** (195.7 mg, 0.3mmol), aryl triflates **2g** (267 mg, 0.6 mmol), **Solution A** (1 mL), **Solution B** (2 mL) and DMF (1 mL) in 5 mL undivided three-necked bottle. The product was purified by silica chromatography. Compound **29g** (259.1 mg, 91% yield,  $\beta$  only, PE:EA = 5:1,  $R_f$  = 0.4) was obtained as white foam.

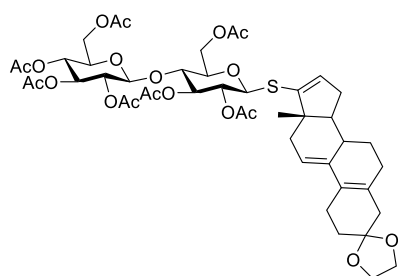

$[\alpha]_D^{25}$  38.0(c = 0.50, CHCl<sub>3</sub>); <sup>1</sup>H NMR (400 MHz, CDCl<sub>3</sub>)  $\delta$  5.71 (s, 1H), 5.54 (s, 1H), 5.21 (t,  $J$  = 10.0 Hz, 1H), 5.14 (t,  $J$  = 10.0 Hz, 1H), 5.10 – 5.05 (m, 1H), 5.02 (t,  $J$  = 8.0 Hz, 1H), 4.95 – 4.90 (m, 1H), 4.67 (d,  $J$  = 12.0 Hz, 1H), 4.53 – 4.45 (m, 2H), 4.38 (dd,  $J_1$  = 12.0,  $J_2$  = 4.0 Hz, 1H), 4.10 (dd,  $J_1$  = 12.0,  $J_2$  = 8.0 Hz, 1H), 4.08 – 4.02 (m, 1H), 3.99 (s, 4H), 3.77 (t,  $J$  = 10.0 Hz, 1H), 3.70 – 3.60 (m, 2H), 2.57 – 2.47 (m, 1H), 2.36 – 2.27 (m, 3H), 2.25 – 2.14 (m, 4H), 2.12 – 2.07 (m, 7H), 2.05 (s, 3H), 2.04 (s, 3H), 2.02 (s, 3H), 2.01 (s, 3H), 1.98 (s, 3H), 1.92 (s, 1H), 1.89 – 1.75 (m, 4H), 1.70 – 1.60 (m, 1H), 1.29 – 1.24 (m, 1H), 0.78 (s, 3H). <sup>13</sup>C NMR (100 MHz, CDCl<sub>3</sub>)  $\delta$  170.5, 170.3, 170.2, 169.8, 169.6, 169.3, 169.1, 144.2, 137.7, 130.3, 127.8, 126.3, 117.4, 108.0, 100.8, 84.2, 76.6, 73.7, 72.9, 72.0, 71.6, 70.0, 67.7, 64.5, 64.3, 62.4, 61.5, 52.3, 47.3, 41.3, 37.1, 36.4, 32.5, 31.3, 30.9, 27.6, 24.6, 20.8, 20.7, 20.6, 20.5, 16.5. HRMS (ESI-TOF) Calculated for C<sub>46</sub>H<sub>60</sub>O<sub>19</sub>SNa [M+Na]<sup>+</sup> 971.3342, found 971.3336.

#### 4-(((2S,3R,4S,5S,6R)-3,4,5-trihydroxy-6-(hydroxymethyl)tetrahydro-2H-pyran-2-yl)thio)benzotrile **33**

The reaction was carried out according to the general procedure, using glycosyl thiols **30** (58.8 mg, 0.3mmol), aryl triflates **2b** (95  $\mu$ L, 0.6 mmol), **Solution A** (1 mL), **Solution B** (2 mL) and DMF (1 mL) in 5 mL undivided three-necked bottle. The product was purified by silica chromatography. Compound **33** (60.6 mg, 68% yield,  $\beta$  only, DCM:MeOH = 10:1,  $R_f$  = 0.4) was obtained as white foam.

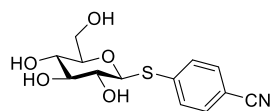

$[\alpha]_D^{25}$  -2.0(c = 0.50, MeOH); <sup>1</sup>H NMR (400 MHz, D<sub>2</sub>O)  $\delta$  7.65 (d,  $J$  = 8.0 Hz, 2H), 7.55 (d,  $J$  = 8.0 Hz, 2H), 4.93 (d,  $J$  = 8.0 Hz, 1H), 3.85 (dd,  $J_1$  = 12.0,  $J_2$  = 4.0 Hz, 1H), 3.66 (dd,  $J_1$  = 16.0,  $J_2$  = 8.0 Hz, 1H), 3.56 – 3.46 (m, 2H), 3.43 – 3.31 (m, 2H). <sup>13</sup>C NMR (100 MHz, D<sub>2</sub>O)  $\delta$  140.6, 132.8, 129.4, 119.4, 109.1, 85.8, 79.9, 77.2, 71.7, 69.3, 60.7. HRMS (ESI-TOF) Calculated for C<sub>13</sub>H<sub>15</sub>NO<sub>5</sub>S [M+NH<sub>4</sub>]<sup>+</sup> 315.1015, found 315.1011. HRMS (ESI-TOF) Calculated for C<sub>13</sub>H<sub>19</sub>N<sub>2</sub>O<sub>5</sub>S [M+NH<sub>4</sub>]<sup>+</sup> 315.1015, found 315.1011.

#### 4-(((2S,3R,4S,5S,6R)-3,4,5-trihydroxy-6-(hydroxymethyl)tetrahydro-2H-pyran-2-yl)thio)benzotrile **34**

The reaction was carried out according to the general procedure, using glycosyl thiols **31** (54.0 mg, 0.3mmol), aryl triflates **2a** (110  $\mu$ L, 0.6 mmol), **Solution A** (1 mL), **Solution B** (2 mL) and DMF (1 mL) in 5 mL undivided three-necked bottle. The product was purified by silica chromatography. Compound **34** (66 mg, 68% yield,  $\alpha$  only, DCM:MeOH = 10:1,  $R_f$  = 0.4) was obtained as foam.

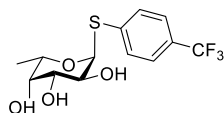

$[\alpha]_D^{25}$  -35.2(c = 0.50, MeOH); <sup>1</sup>H NMR (600 MHz, MeOD)  $\delta$  7.64 (d,  $J$  = 8.0 Hz, 2H), 7.57 (d,  $J$  = 8.0 Hz, 2H), 4.71 (d,  $J$  = 4.0 Hz, 1H), 3.87 – 3.71 (m, 1H), 3.69 (d,  $J$  = 3.3, 1.0 Hz, 1H), 3.62 (t,  $J$  = 6.0 Hz, 1H), 3.54 – 3.50 (m, 1H), 1.28 (d,  $J$  = 4.0 Hz, 3H). <sup>13</sup>C NMR (150 MHz, MeOD)  $\delta$  142.3, 130.84, 130.82, 129.4, 129.2, 128.4, 126.62, 126.59, 126.57, 126.5, 125.8 (CF<sub>3</sub>), 88.6, 76.5, 76.2, 73.1, 70.6, 17.1. HRMS (ESI-TOF) Calculated for C<sub>13</sub>H<sub>15</sub>F<sub>3</sub>O<sub>4</sub>SNa [M+Na]<sup>+</sup> 347.0535, found 347.0534.

#### (2S,3R,4S,5S,6R)-2-(((2R,3S,4R,5R,6S)-4,5-dihydroxy-2-(hydroxymethyl)-6-((4-

**(trifluoromethyl)phenylthio)tetrahydro-2H-pyran-3-yl)oxy)-6-(hydroxymethyl)tetrahydro-2H-pyran-3,4,5-triol 35**

The reaction was carried out according to the general procedure, using glycosyl thiols **32** (107 mg, 0.3mmol), aryl triflates **2a** (110  $\mu$ L, 0.6 mmol), **Solution A** (1 mL), **Solution B** (2 mL) and DMF (1 mL) in 5 mL undivided three-necked bottle. The product was purified by silica chromatography. Compound **35** (82.9 mg, 55% yield,  $\beta$  only, DCM:MeOH = 3:1,  $R_f$  = 0.4) was obtained as colorless oil.

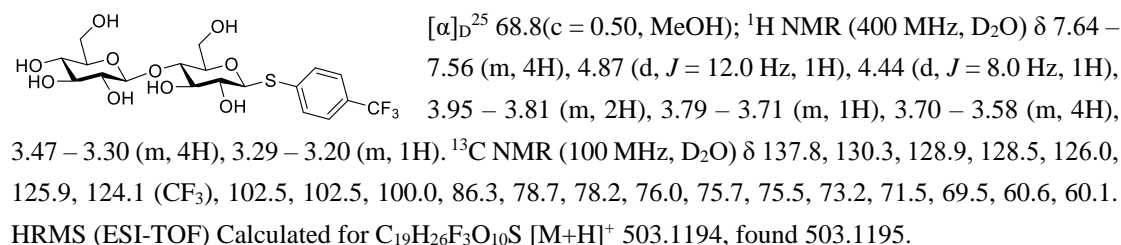

**(2S,3R,4S,5S,6R)-2-(cyclohex-1-en-1-ylthio)-6-(hydroxymethyl)tetrahydro-2H-pyran-3,4,5-triol 36**

The reaction was carried out according to the general procedure, using glycosyl thiols **30** (58.8 mg, 0.3mmol), aryl triflates **22a** (105  $\mu$ L, 0.6 mmol), **Solution A** (1 mL), **Solution B** (2 mL) and DMF (1 mL) in 5 mL undivided three-necked bottle. The product was purified by silica chromatography. Compound **36** (56.3 mg, 68% yield,  $\beta$  only, DCM:MeOH = 10:1,  $R_f$  = 0.4) was obtained as colorless oil.

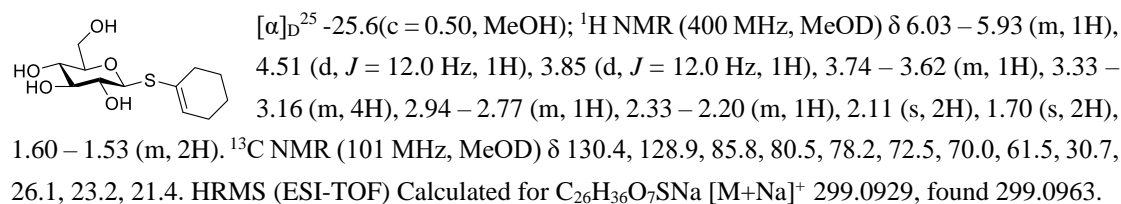

**(2R,3S,4S,5R,6S)-2-(hydroxymethyl)-6-(((13S)-13-methyl-1,2,4,6,7,8,12,13,14,15-decahydrospiro[cyclopenta[a]phenanthrene-3,2'-[1,3]dioxolan]-17-yl)thio)tetrahydro-2H-pyran-3,4,5-triol 37**

The reaction was carried out according to the general procedure, using glycosyl thiols **30** (58.8 mg, 0.3mmol), aryl triflates **22g** (267 mg, 0.6 mmol), **Solution A** (1 mL), **Solution B** (2 mL) and DMF (1 mL) in 5 mL undivided three-necked bottle. The product was purified by silica chromatography. Compound **37** (91.6 mg, 62% yield,  $\beta$  only, DCM:MeOH = 10:1,  $R_f$  = 0.4) was obtained as white foam.

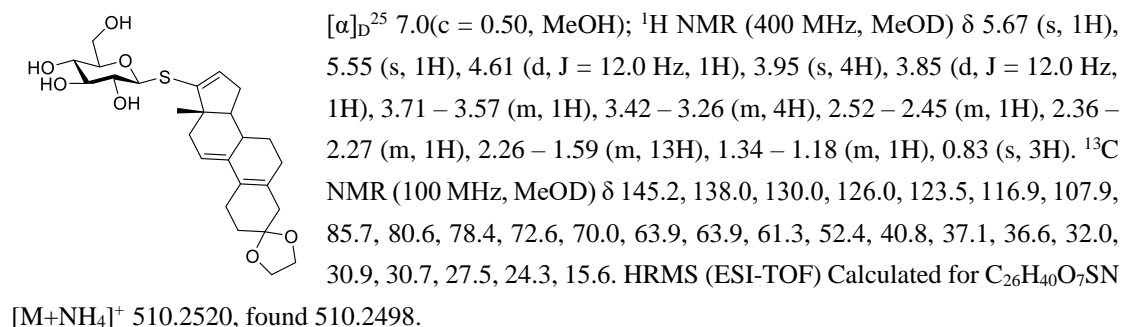

## References:

1. (a) R. Venkatesh, V. Tiwari and J. Kandasamy, *J. Org. Chem.*, 2022, **87**, 11414-11432; (b) T. Ghosh, A. Santra and A. K. Misra, *Beilstein J. Org. Chem.*, 2013, **9**, 974-982; (c) N. Floyd, B. Vijayakrishnan, J. R. Koeppe and B. G. Davis, *Angew. Chem. Int. Ed.*, 2009, **48**, 7798-7802; (d) Y. C. Lee, C. P. Stowell and M. J. Krantz, *Biochemistry*, 1976, **15**, 3956-3963.
2. (a) Z. Zhu, Y. Gong, W. Tong, W. Xue and H. Gong, *Org. Lett.*, 2021, **23**, 2158-2163; (b) B. Dogga, C. S. A. Kumar and J. T. Joseph, *Eur. J. Org. Chem.*, 2021, 309-313; (c) F. Y. Kwong, C. W. Lai, M. Yu, Y. Tian and K. S. Chan, *Tetrahedron*, 2003, **59**, 10295-10305.
3. (a) T. Si, B. Li, W. Xiong, B. Xu and W. Tang, *Org. Biomol. Chem.*, 2017, **15**, 9903-9909; (b) B. Scheiper, M. Bonnekesel, H. Krause and A. Fürstner, *J. Org. Chem.*, 2004, **69**, 3943-3949; (c) F. Zhang, Y. Wang, Y. Wang and Y. Pan, *Org. Lett.*, 2021, **23**, 7524-7528.

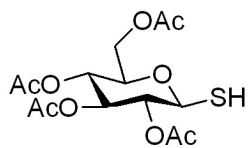

**1**

<sup>1</sup>H NMR (400 MHz, CDCl<sub>3</sub>)

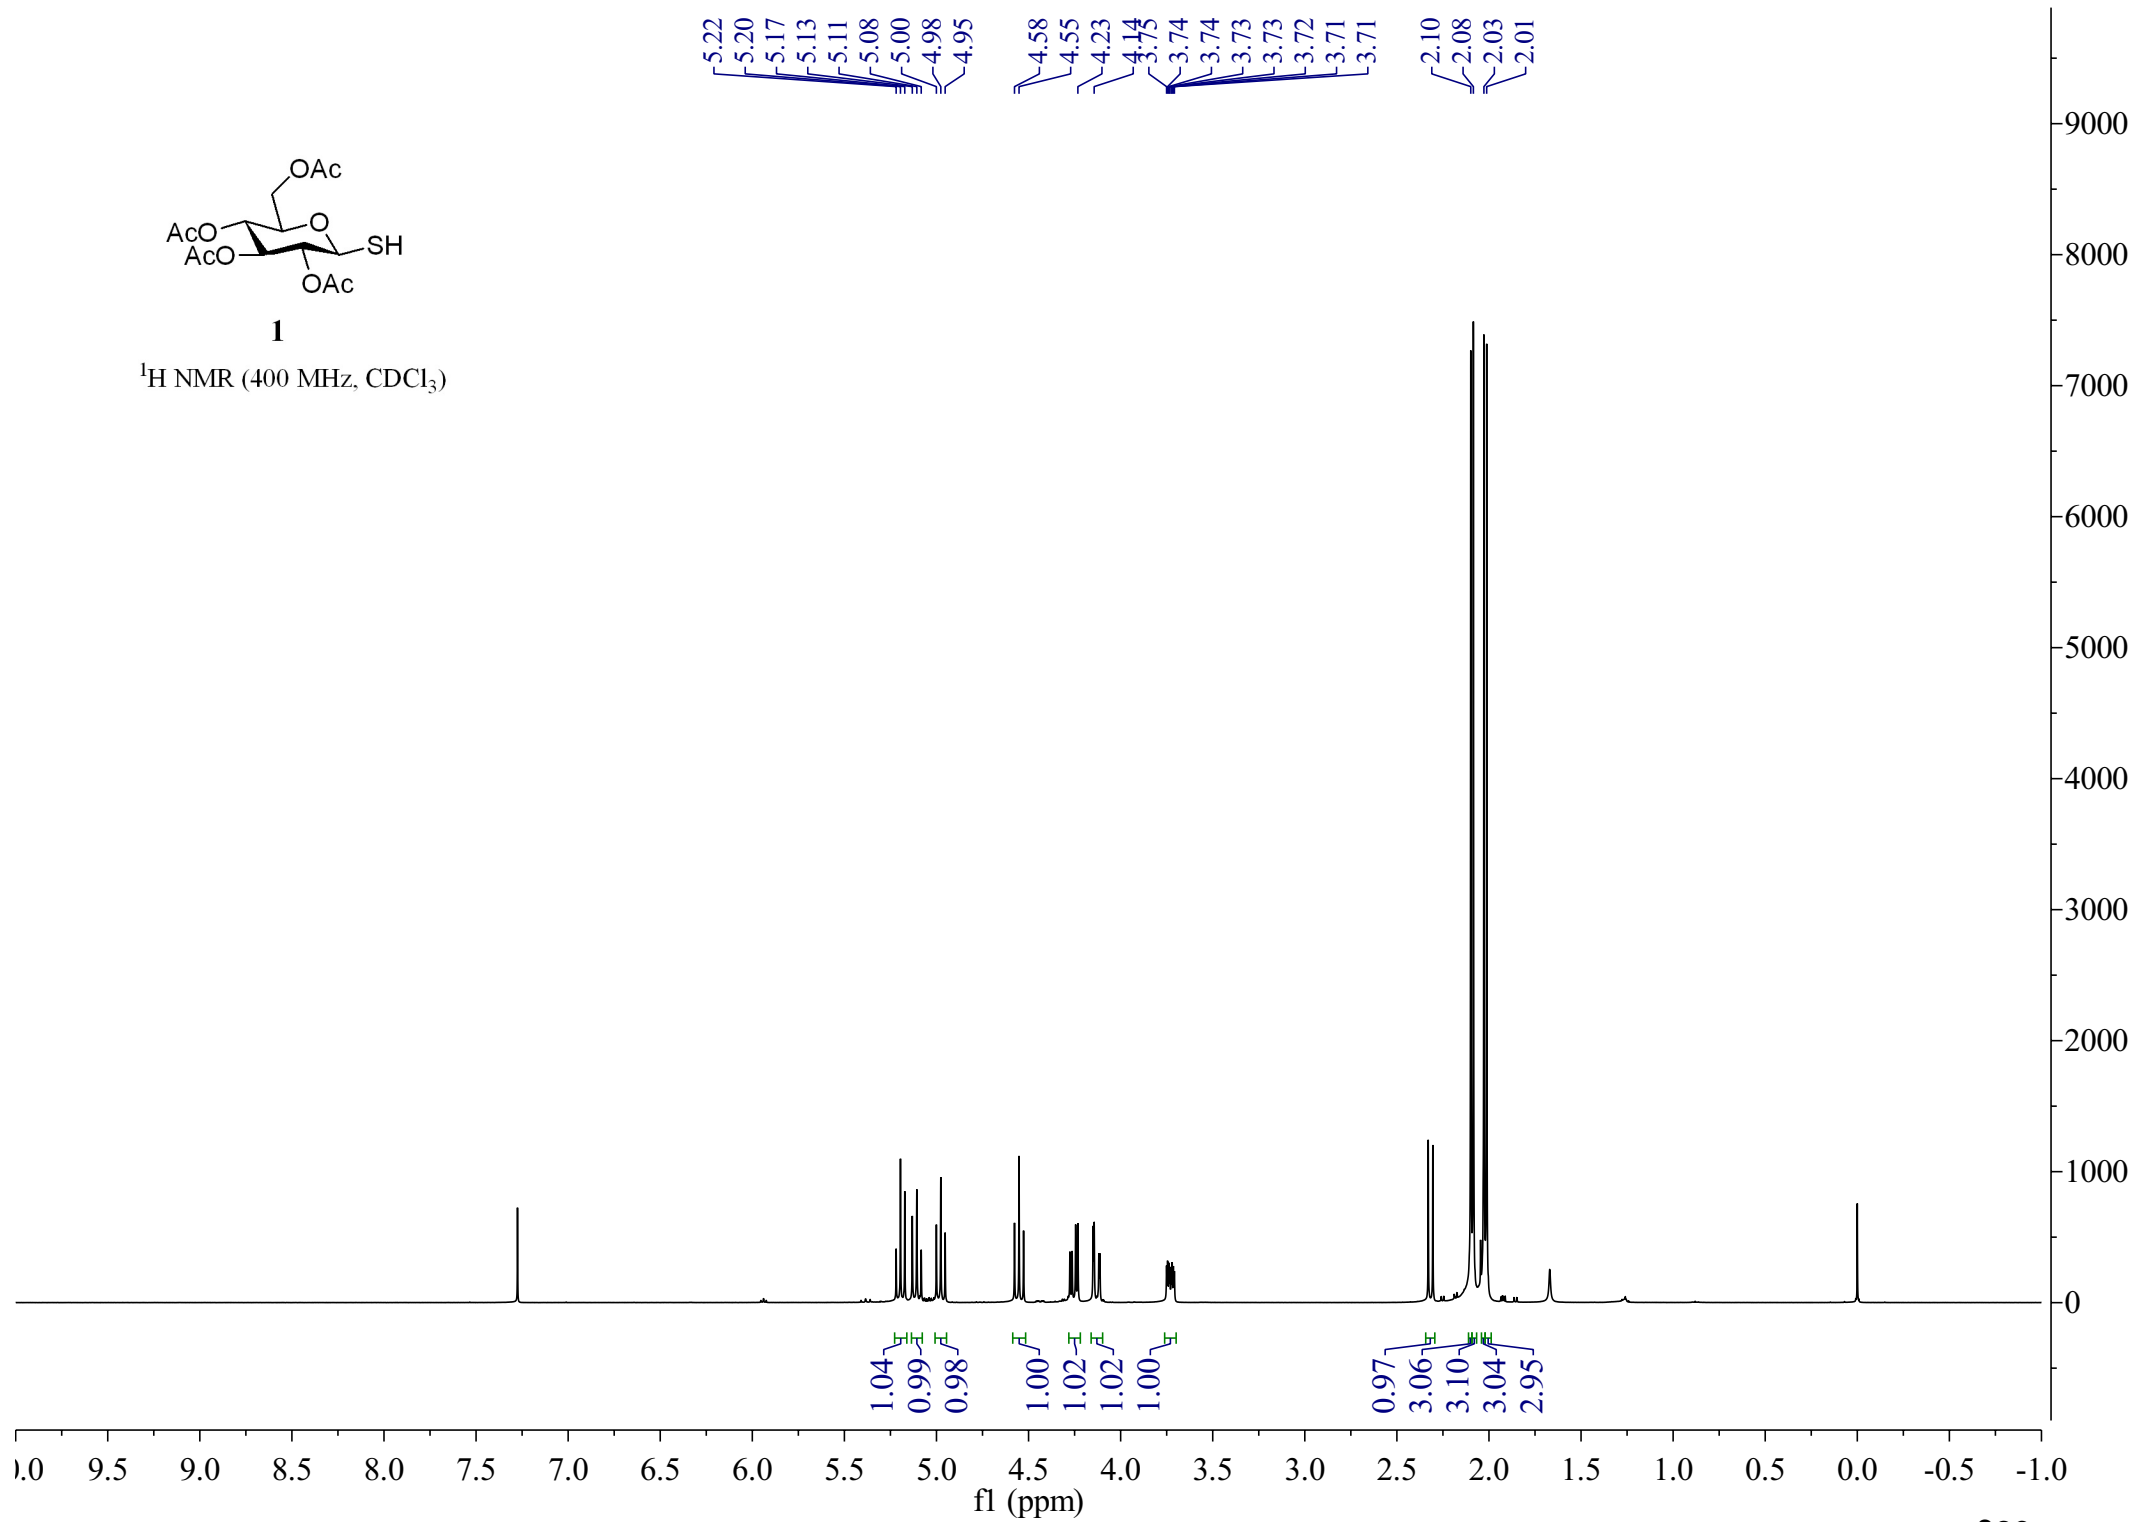

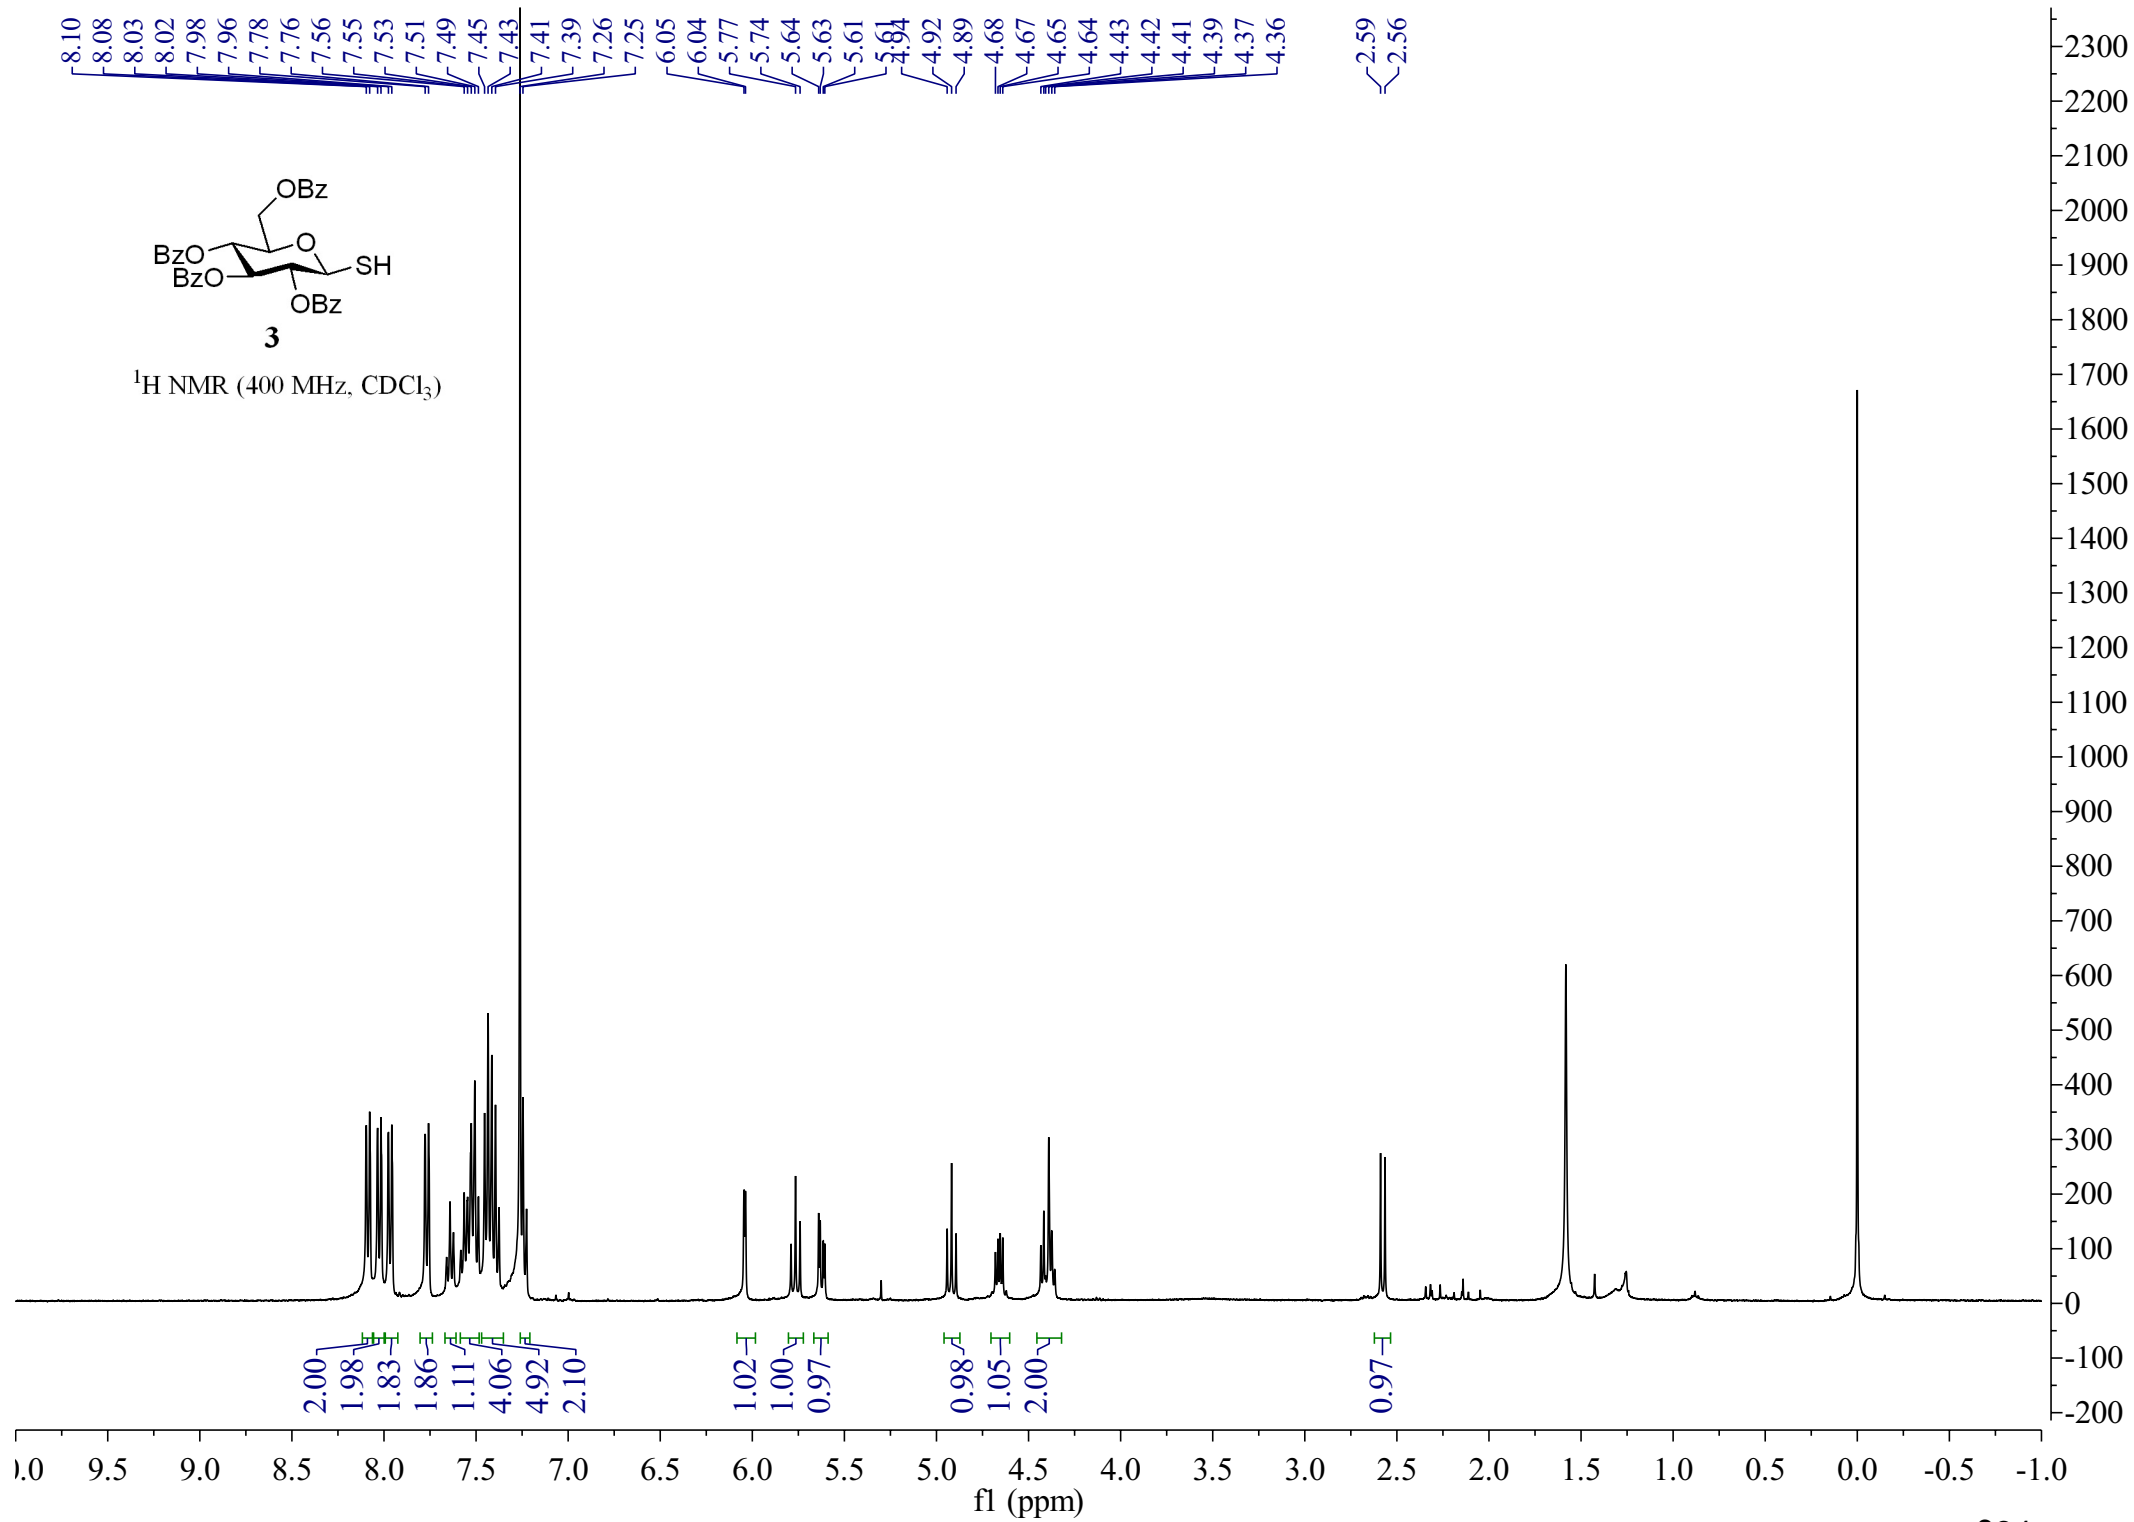



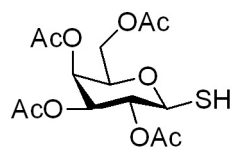

**4**

$^1\text{H NMR}$  (400 MHz,  $\text{CDCl}_3$ )

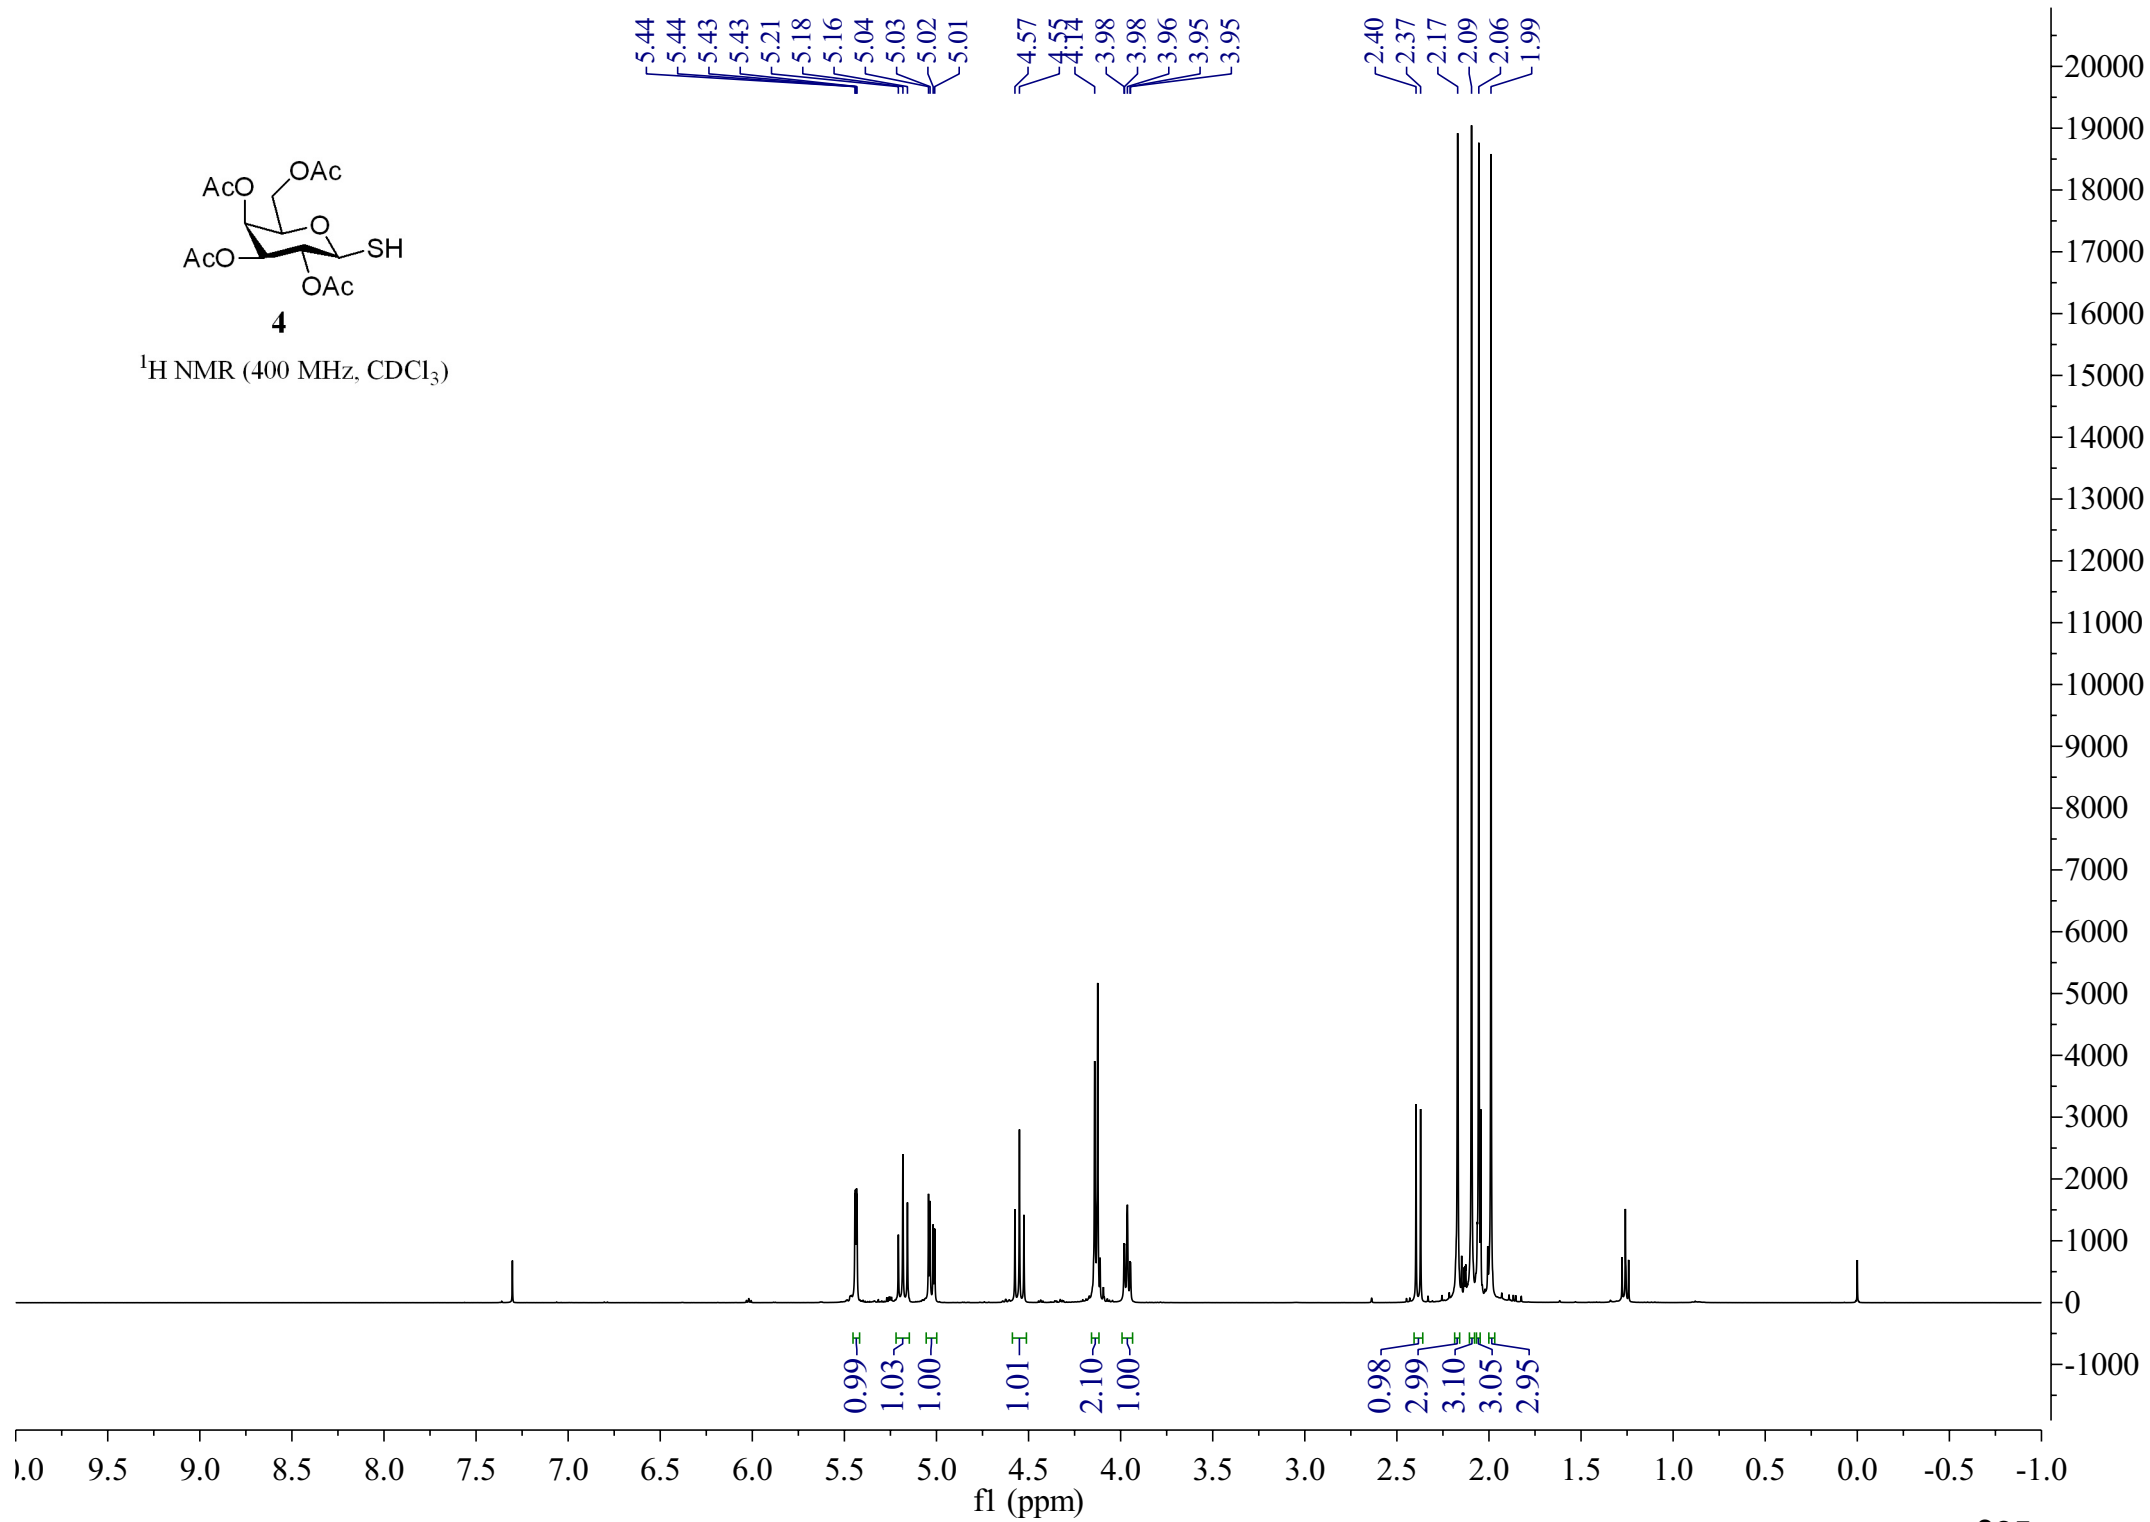

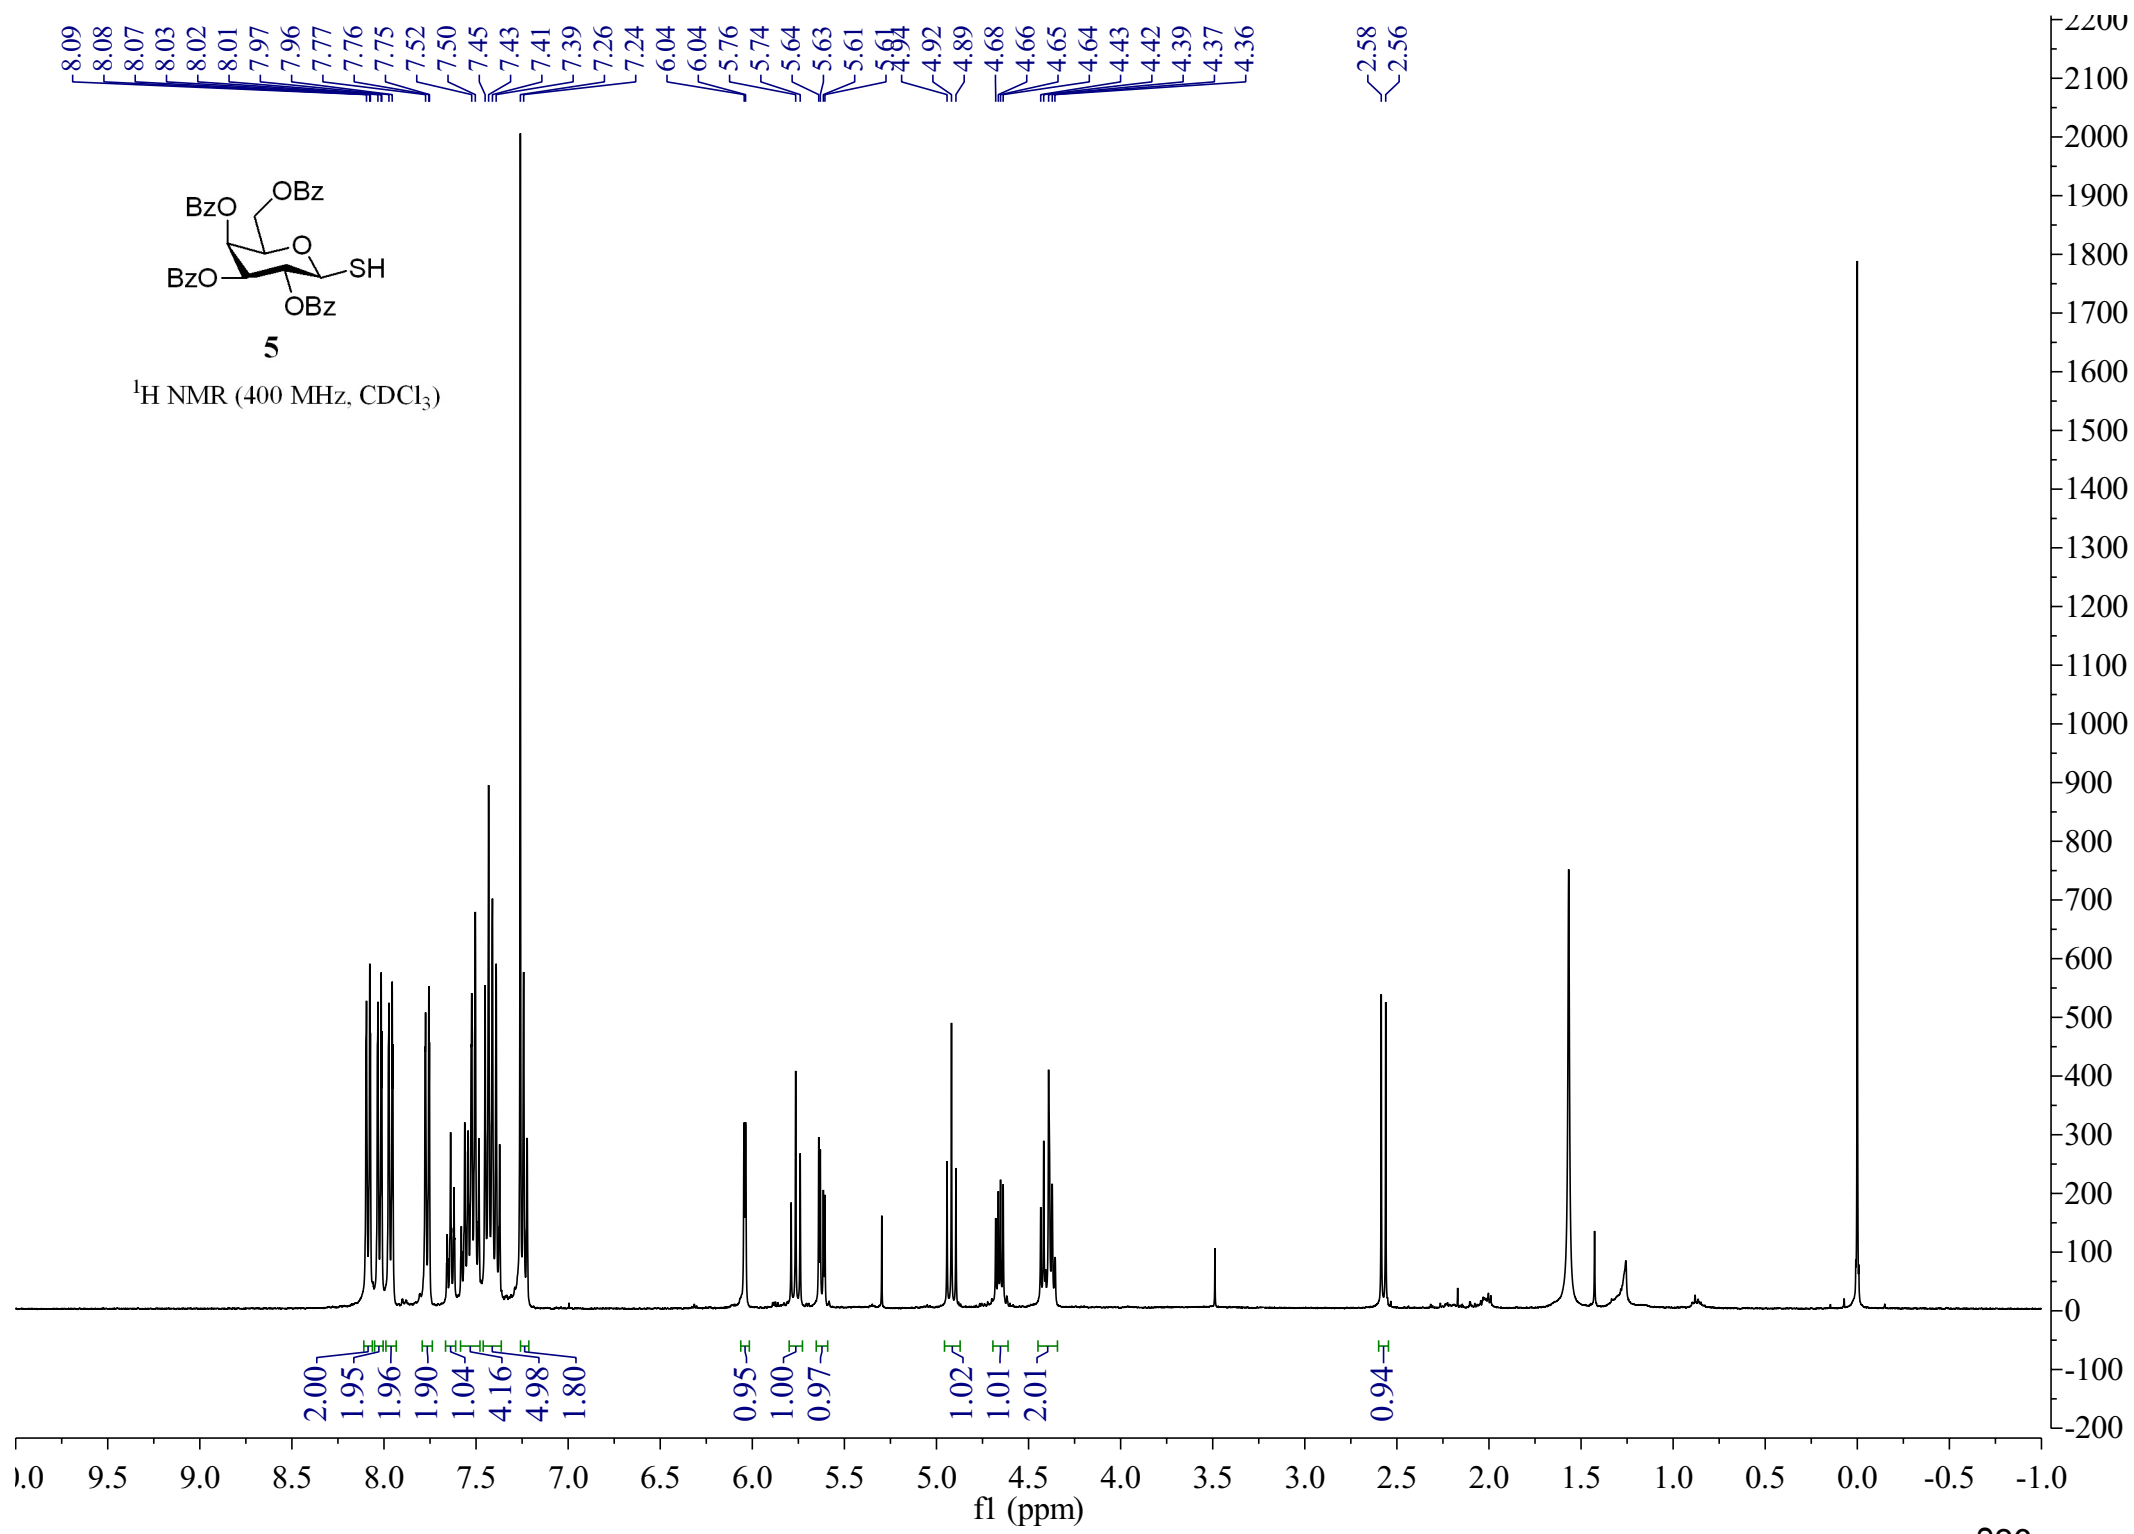

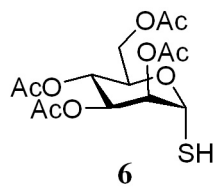

$^1\text{H}$  NMR (400 MHz,  $\text{CDCl}_3$ )

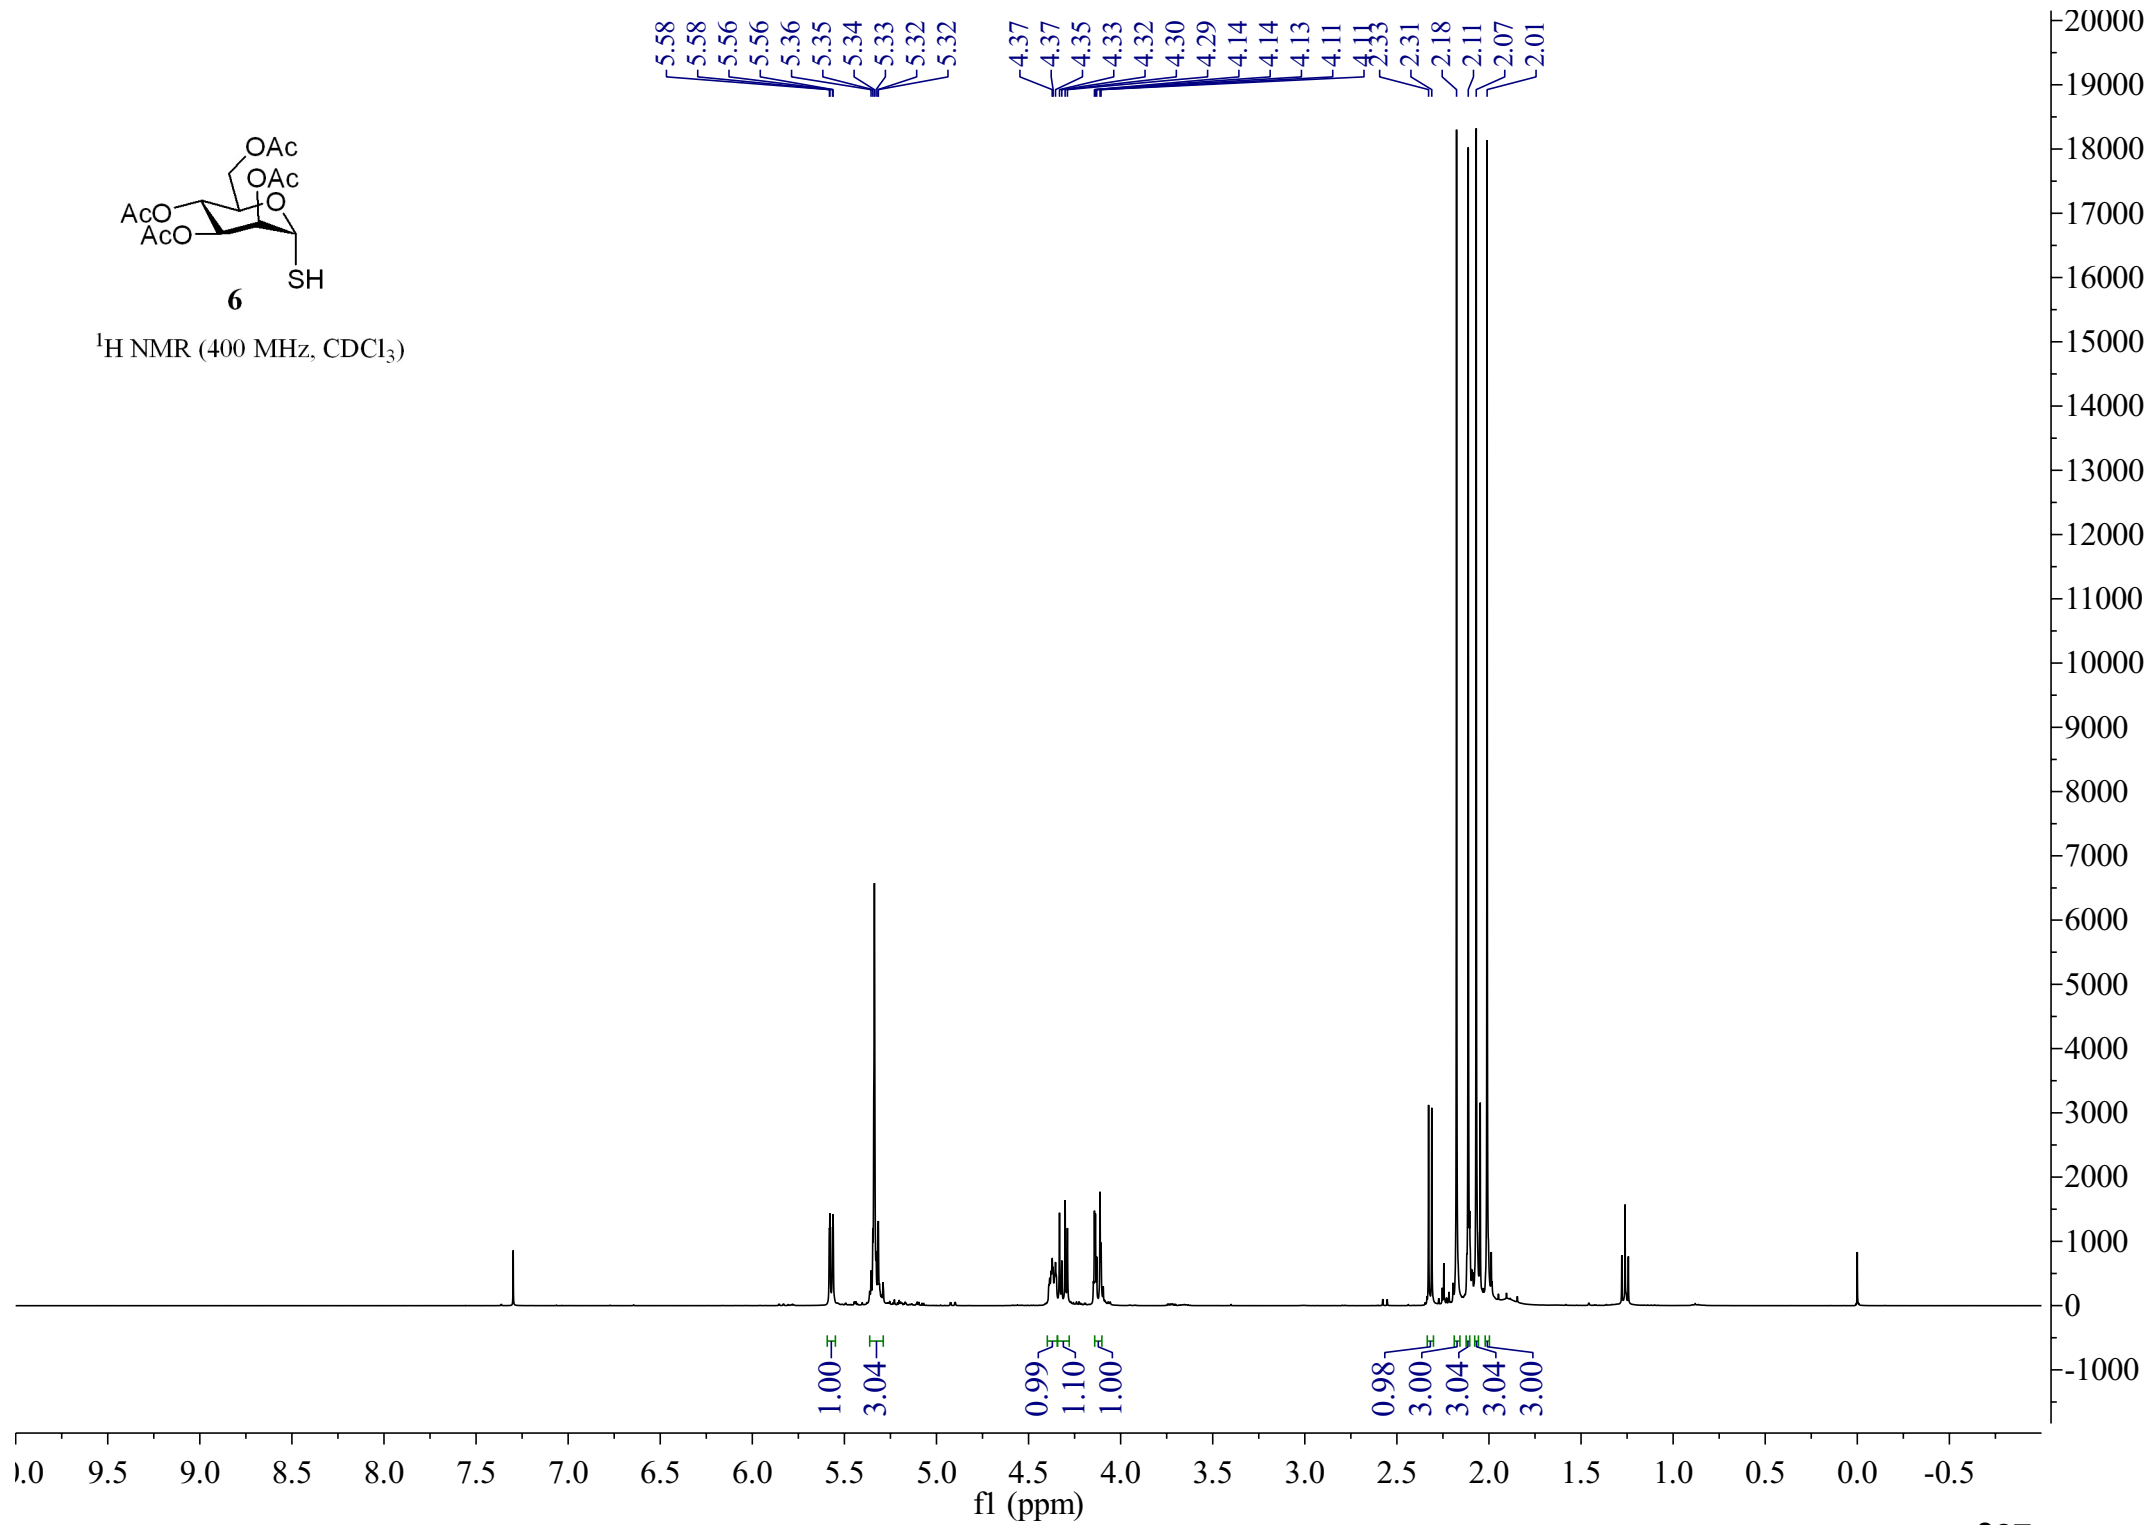

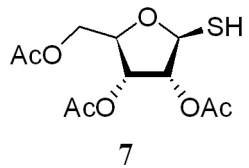

<sup>1</sup>H NMR (400 MHz, CDCl<sub>3</sub>)

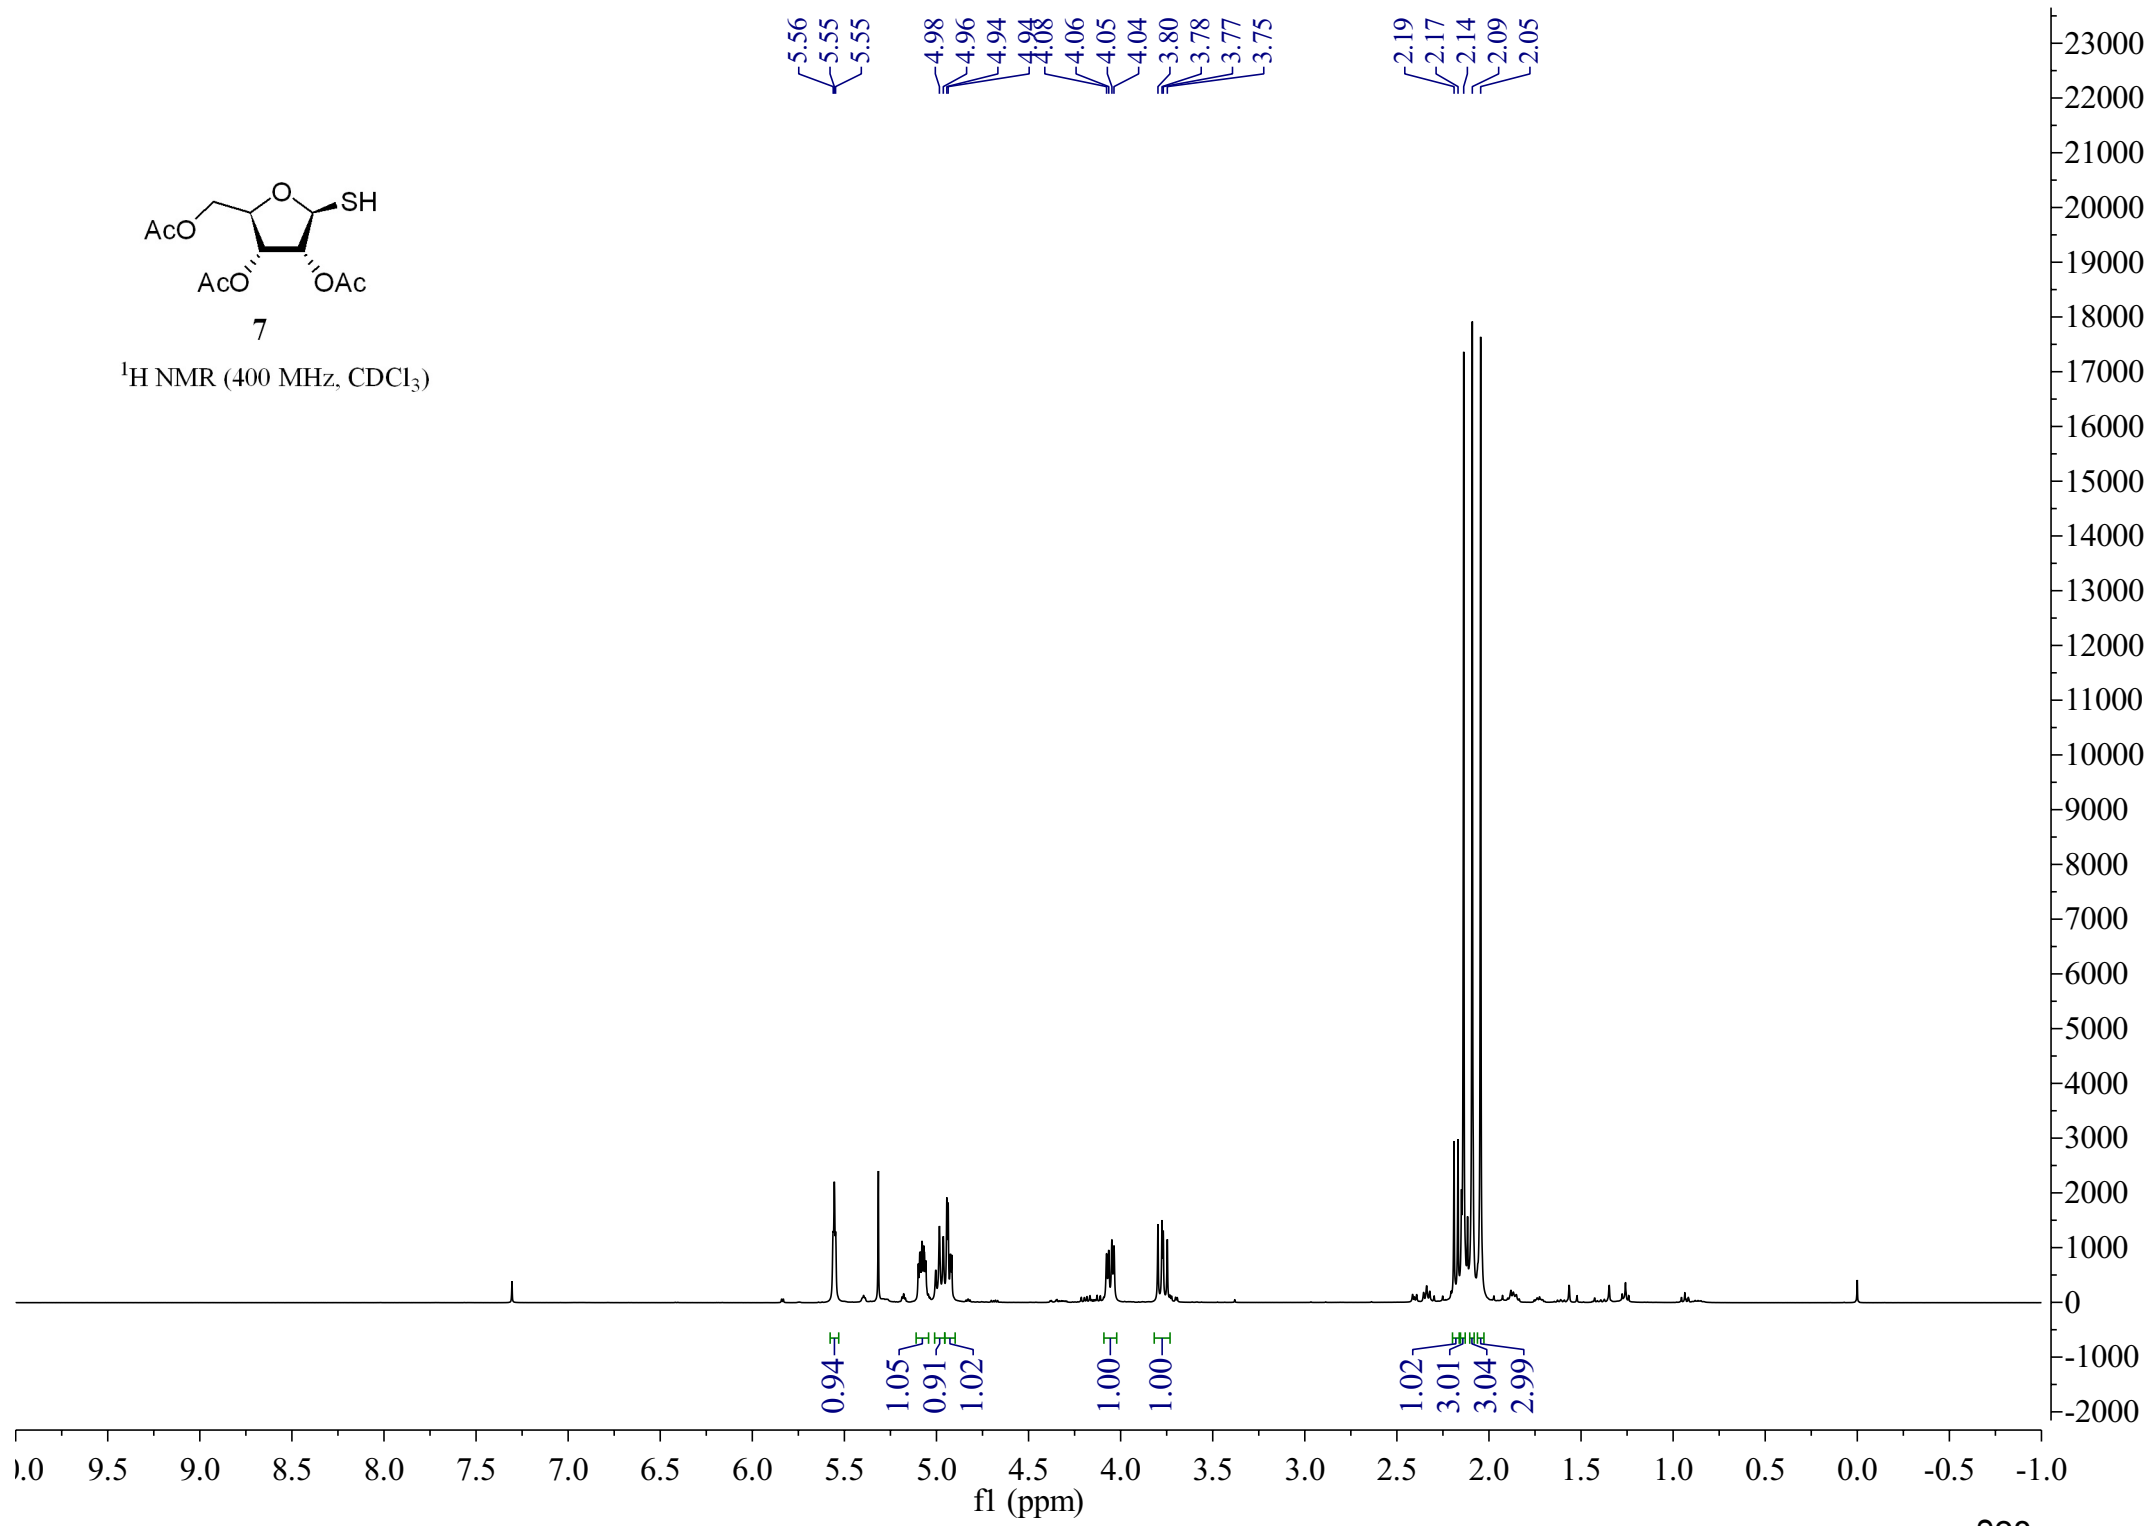

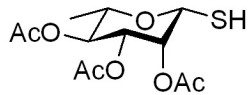

**8**

$^1\text{H}$  NMR (400 MHz,  $\text{CDCl}_3$ )

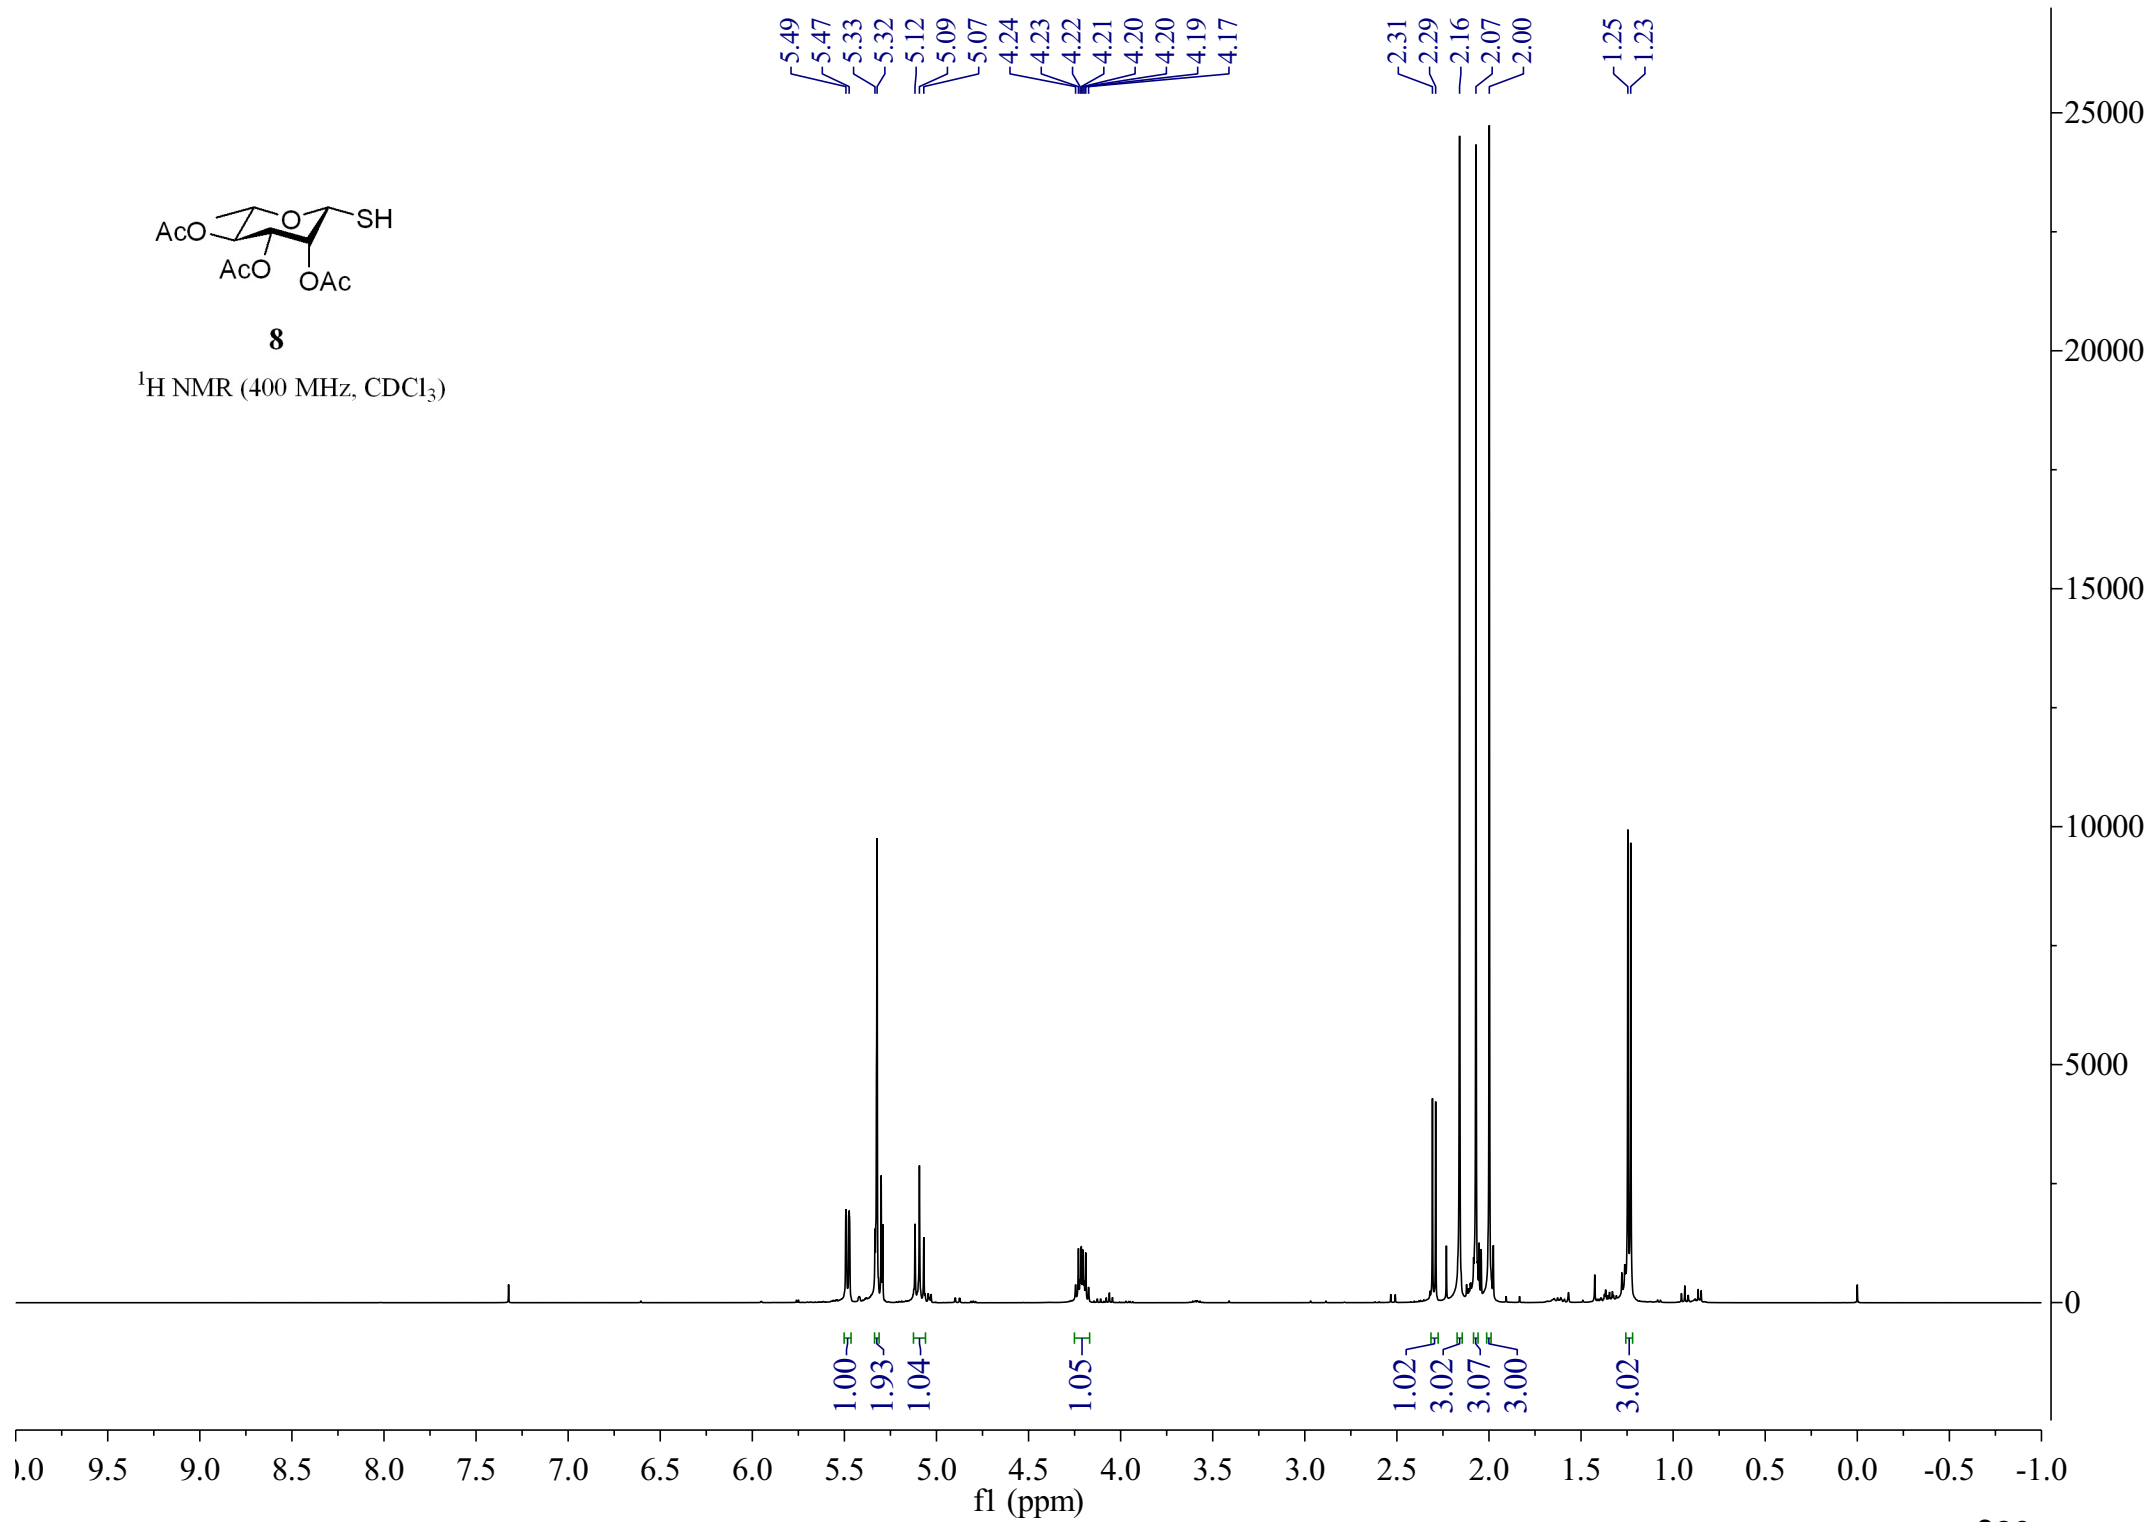

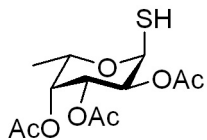

9

<sup>1</sup>H NMR (400 MHz, CDCl<sub>3</sub>)

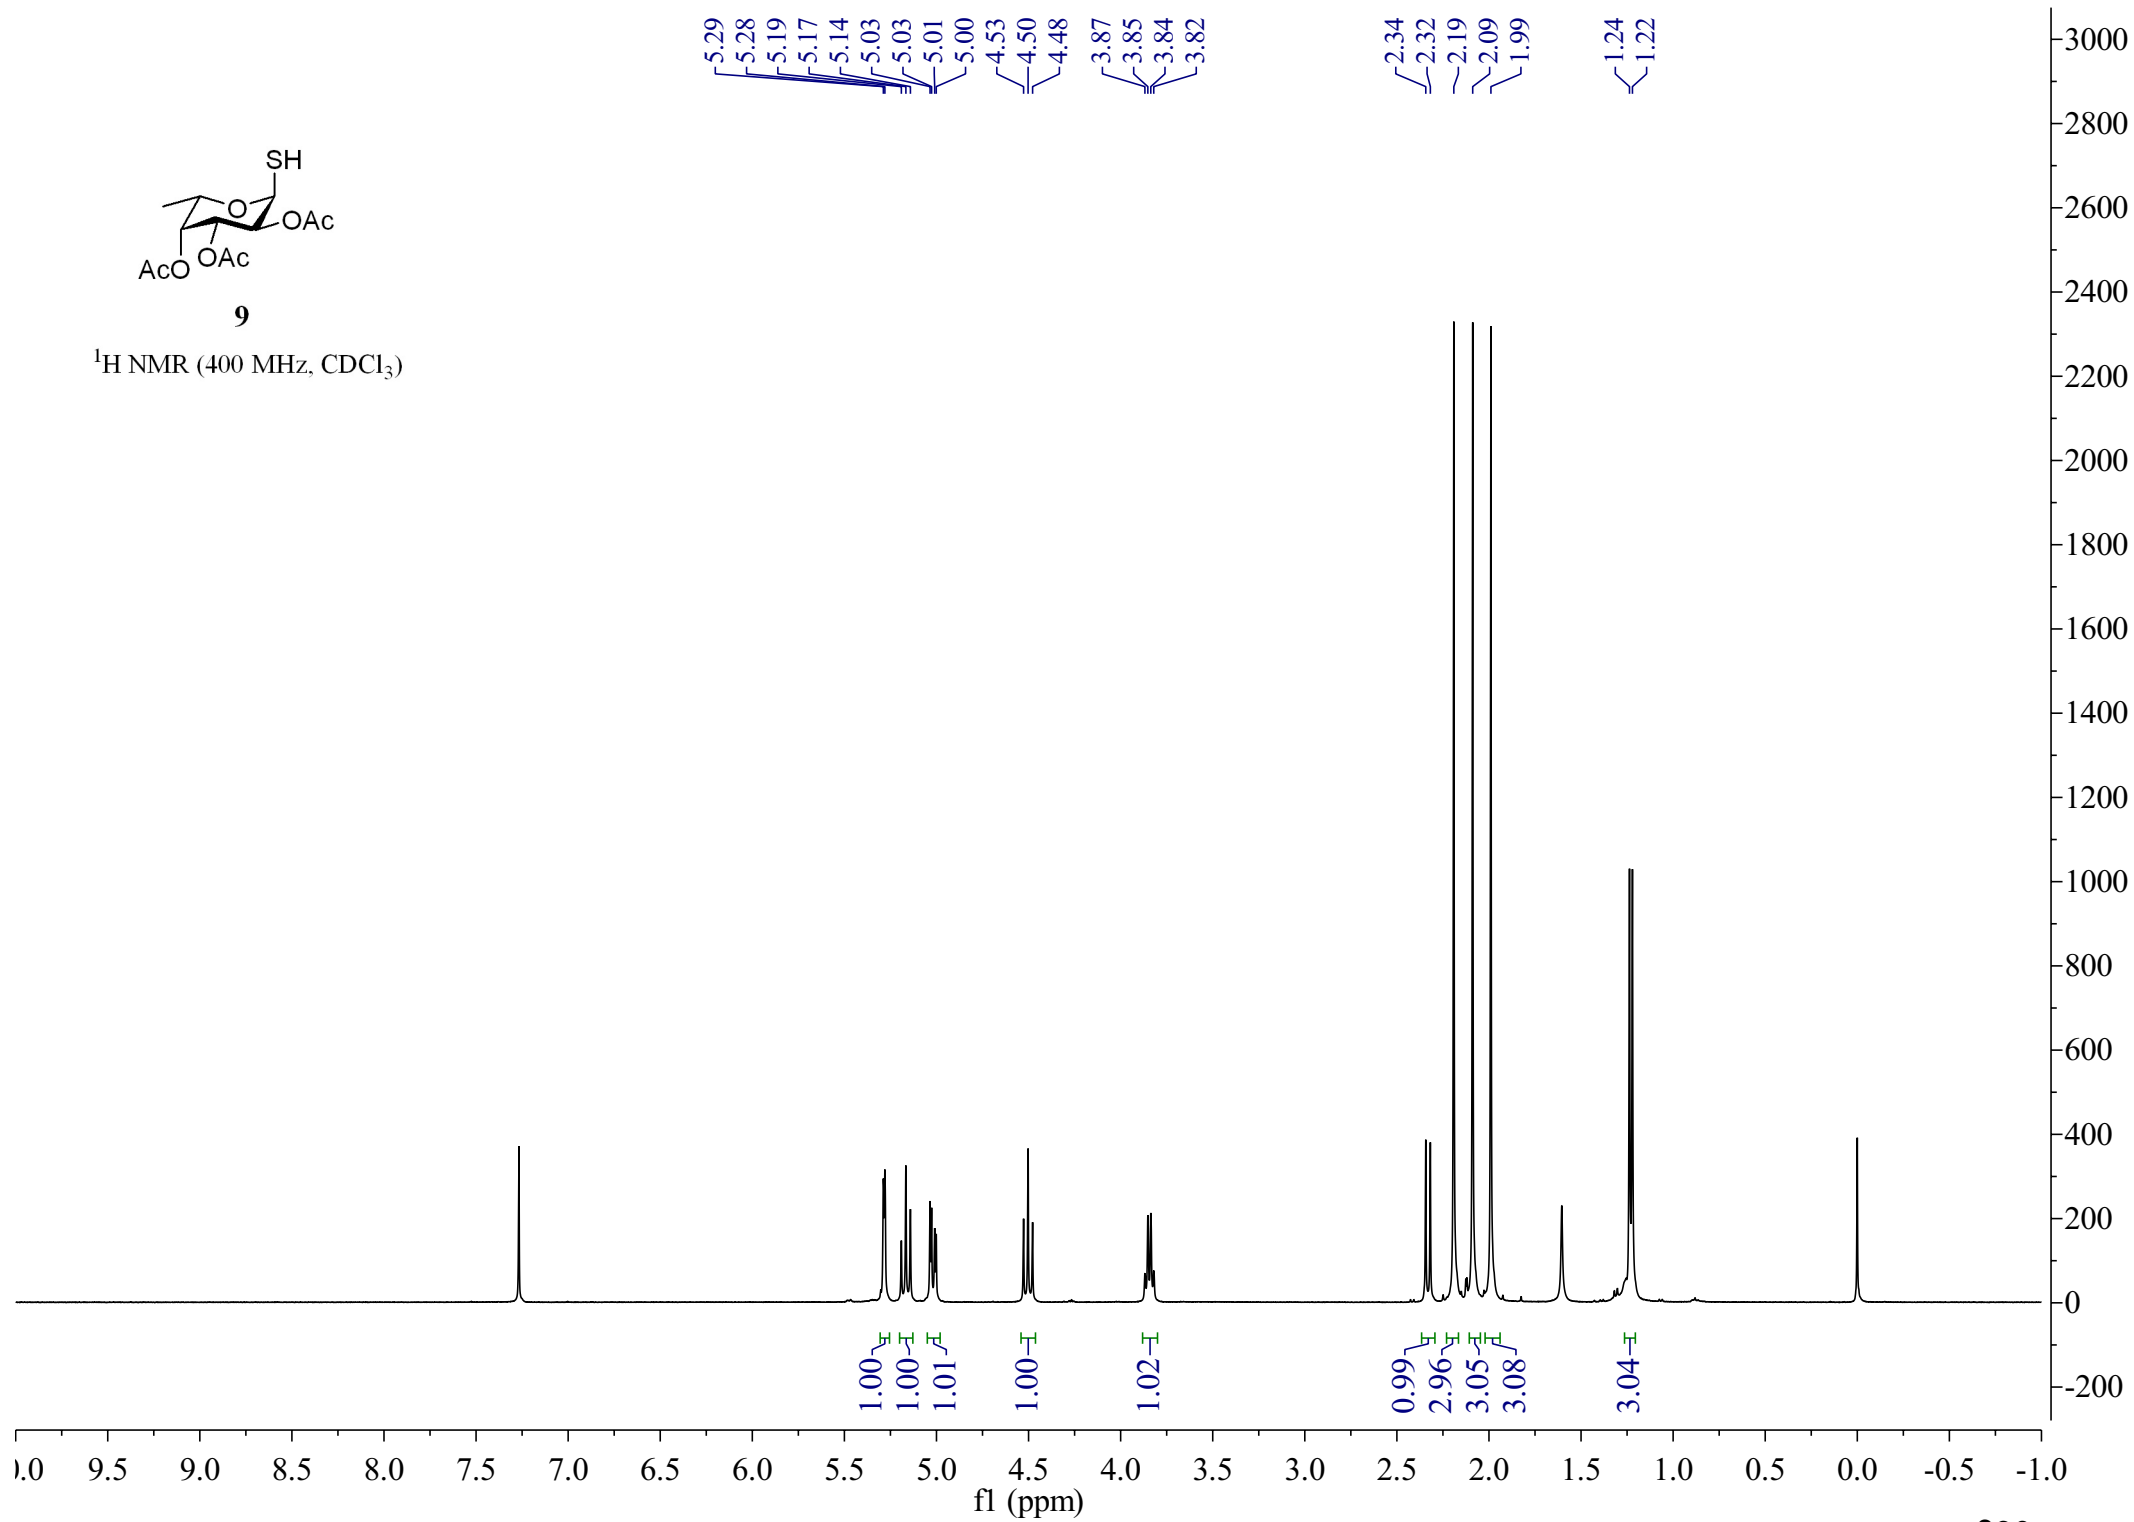

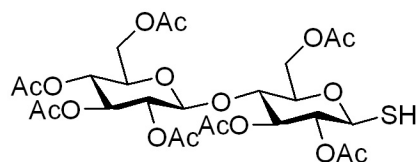

**10**

$^1\text{H NMR}$  (400 MHz,  $\text{CDCl}_3$ )

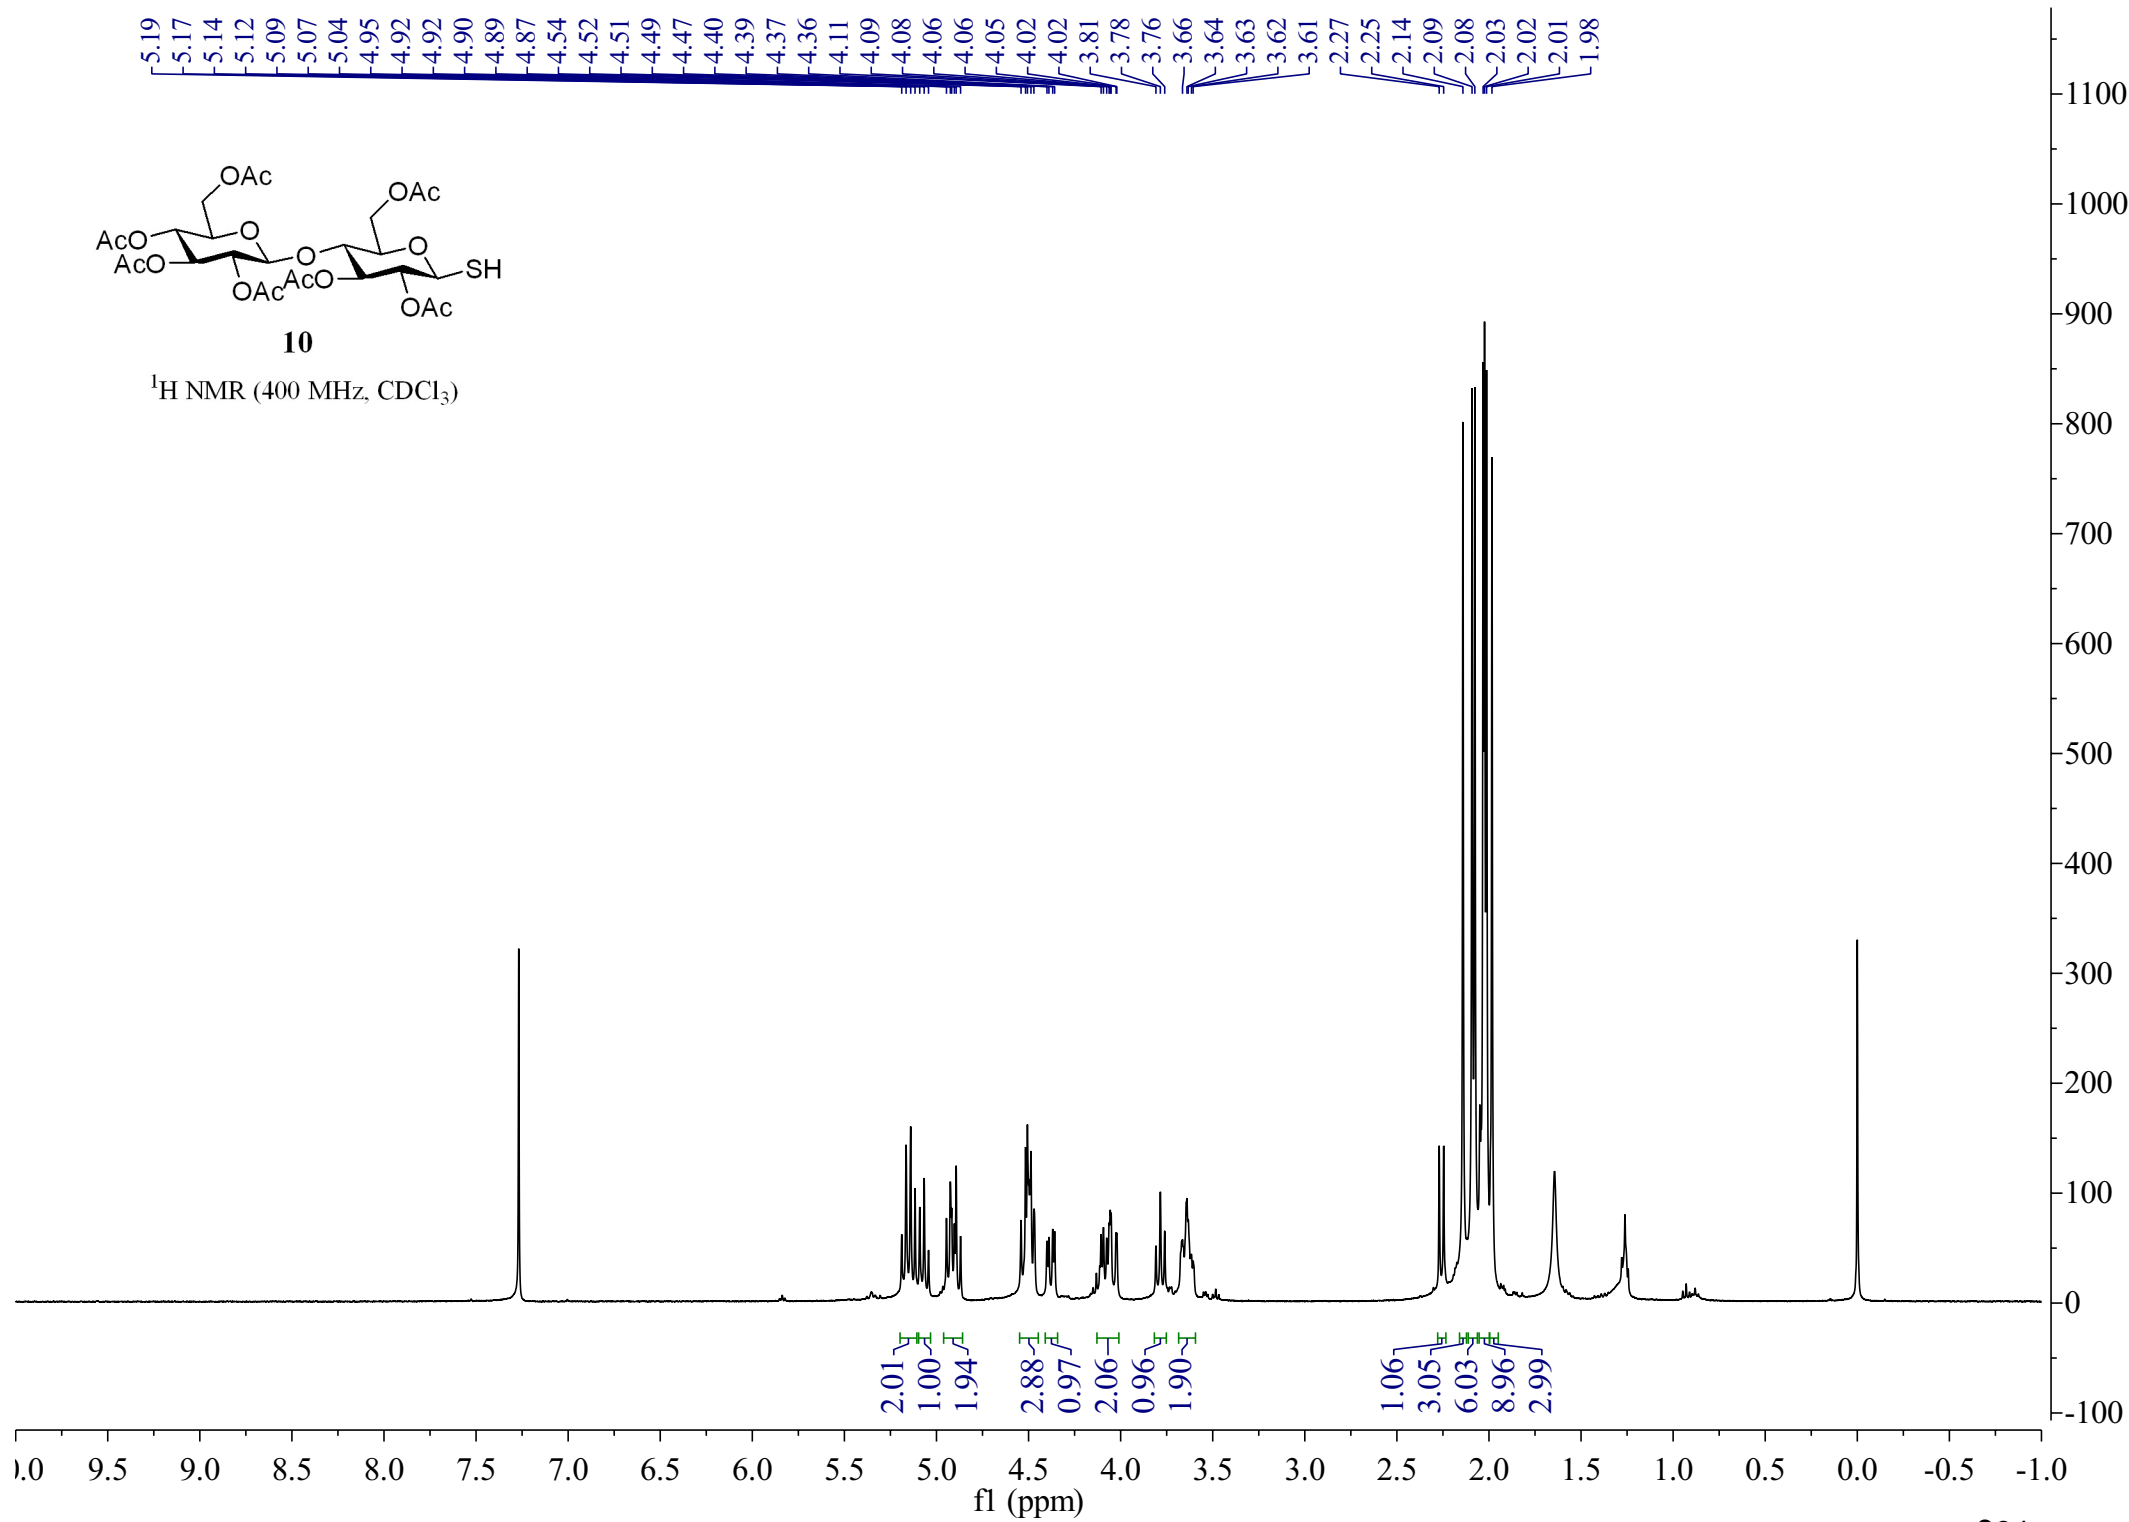

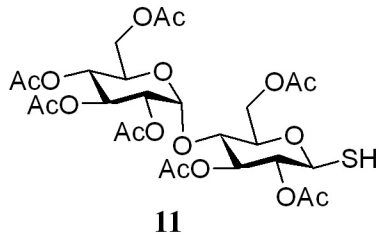

<sup>1</sup>H NMR (400 MHz, CDCl<sub>3</sub>)

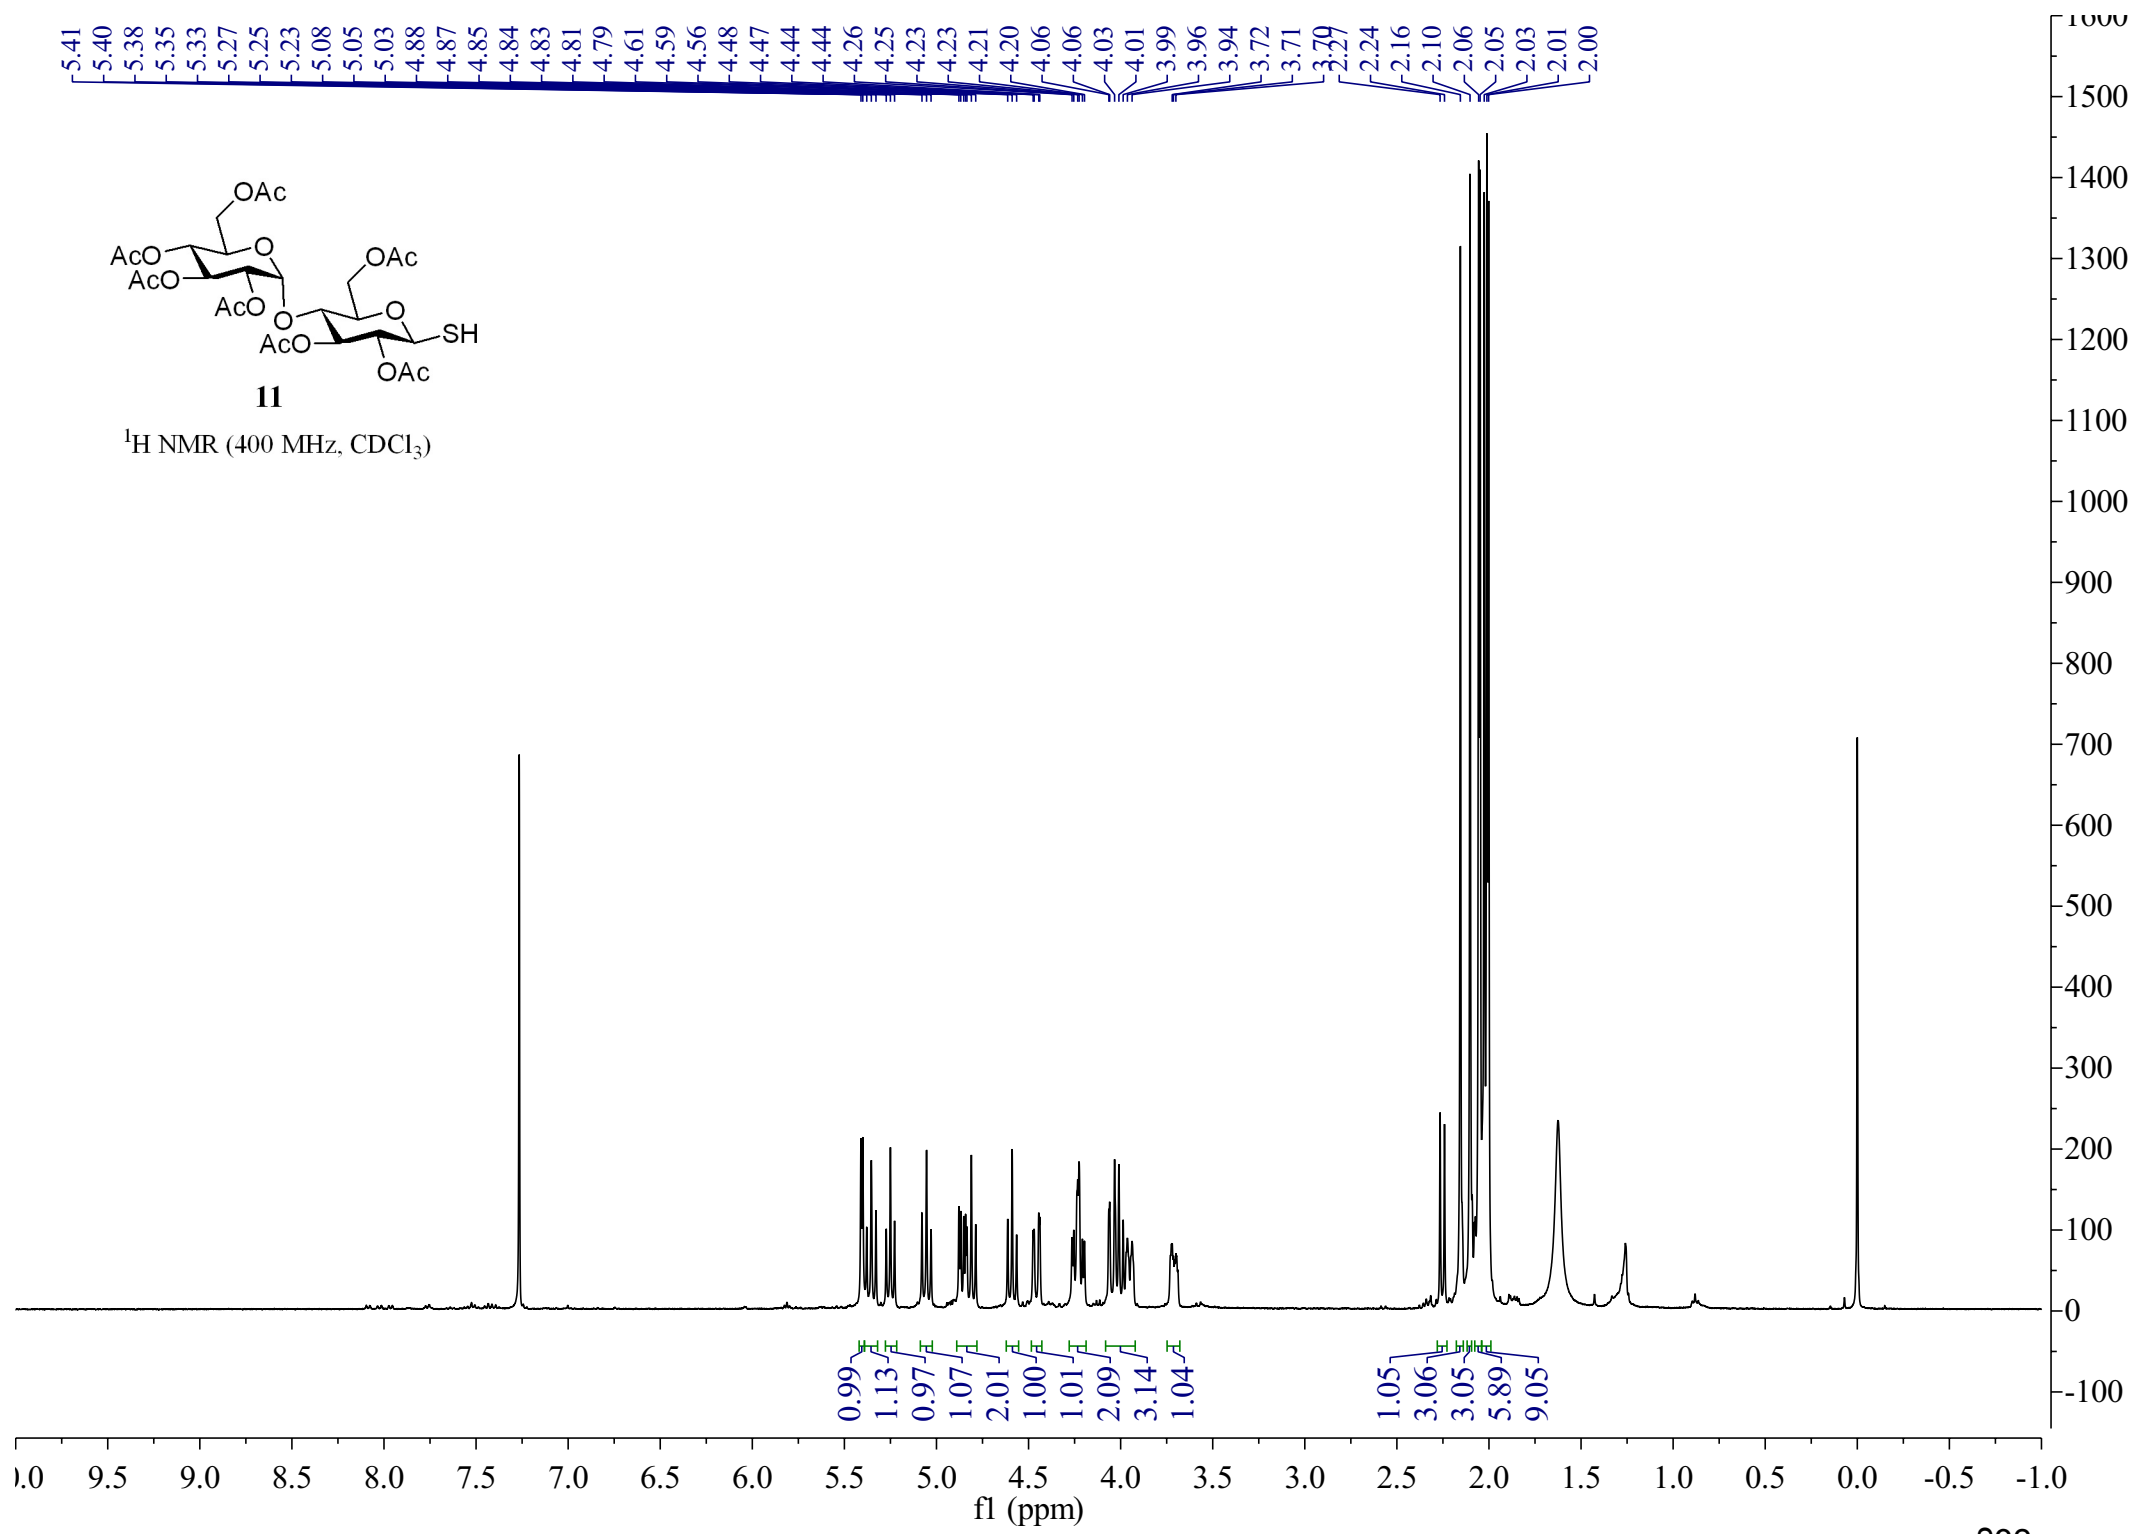



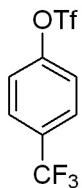

**2a**

<sup>1</sup>H NMR (400 MHz, CDCl<sub>3</sub>)

7.75  
7.73  
7.43  
7.41

2.01

2.00

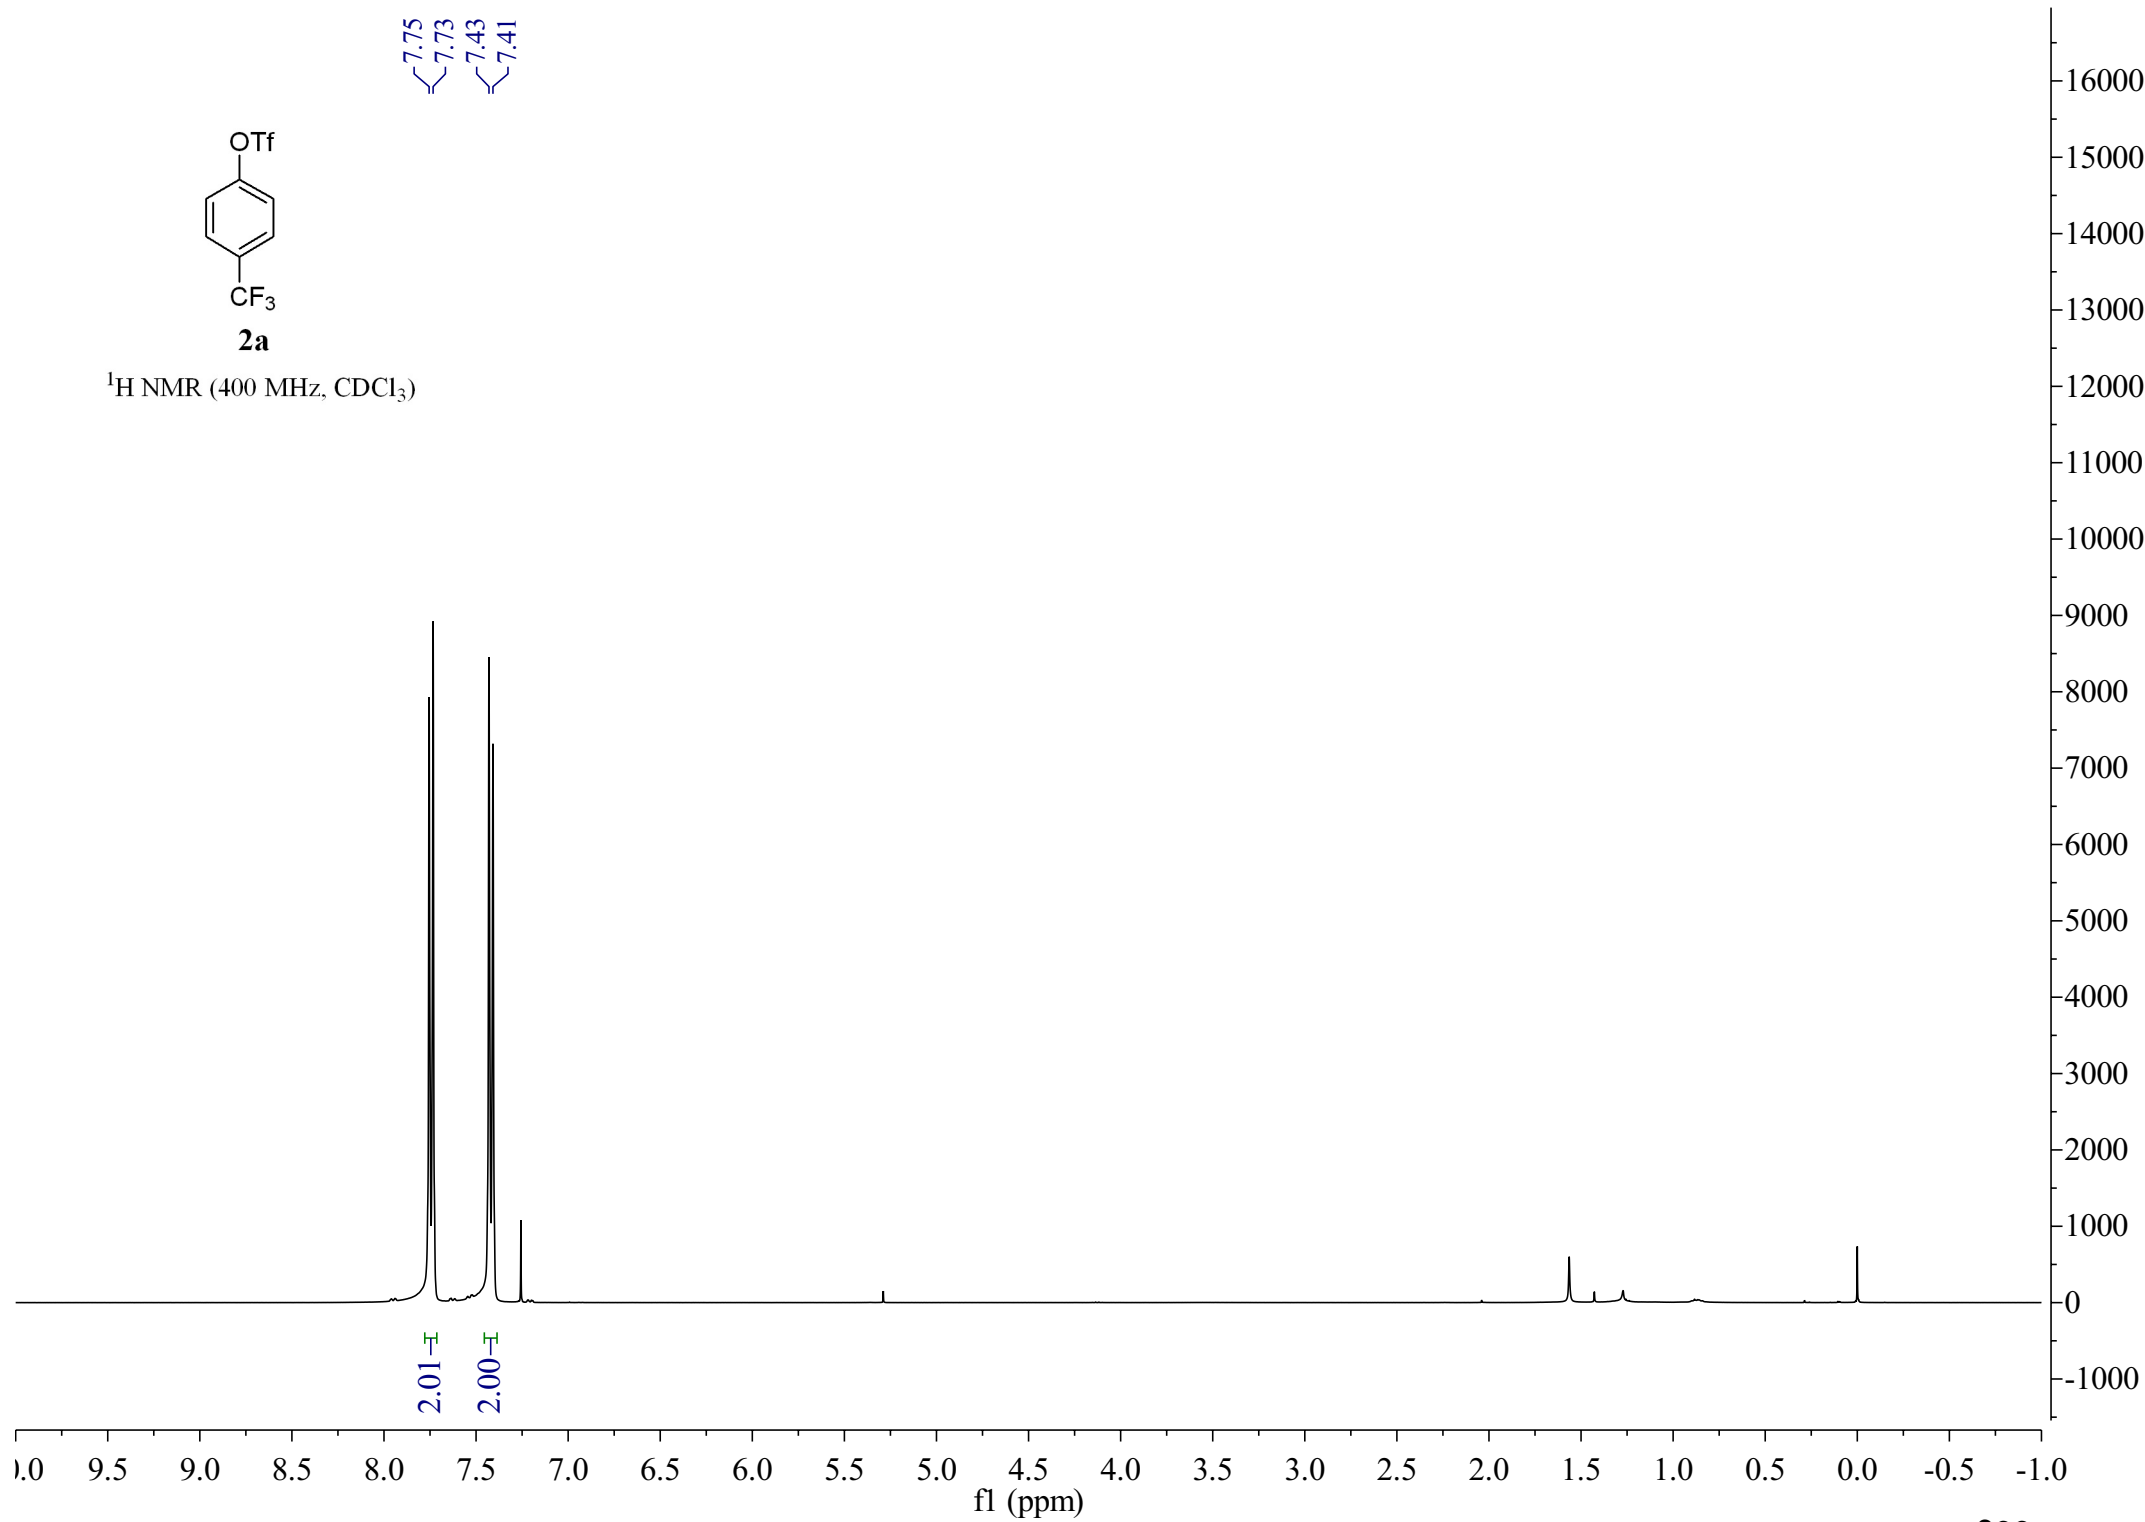

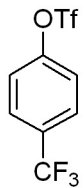

**2a**

$^{19}\text{F}$  NMR (376 MHz,  $\text{CDCl}_3$ )

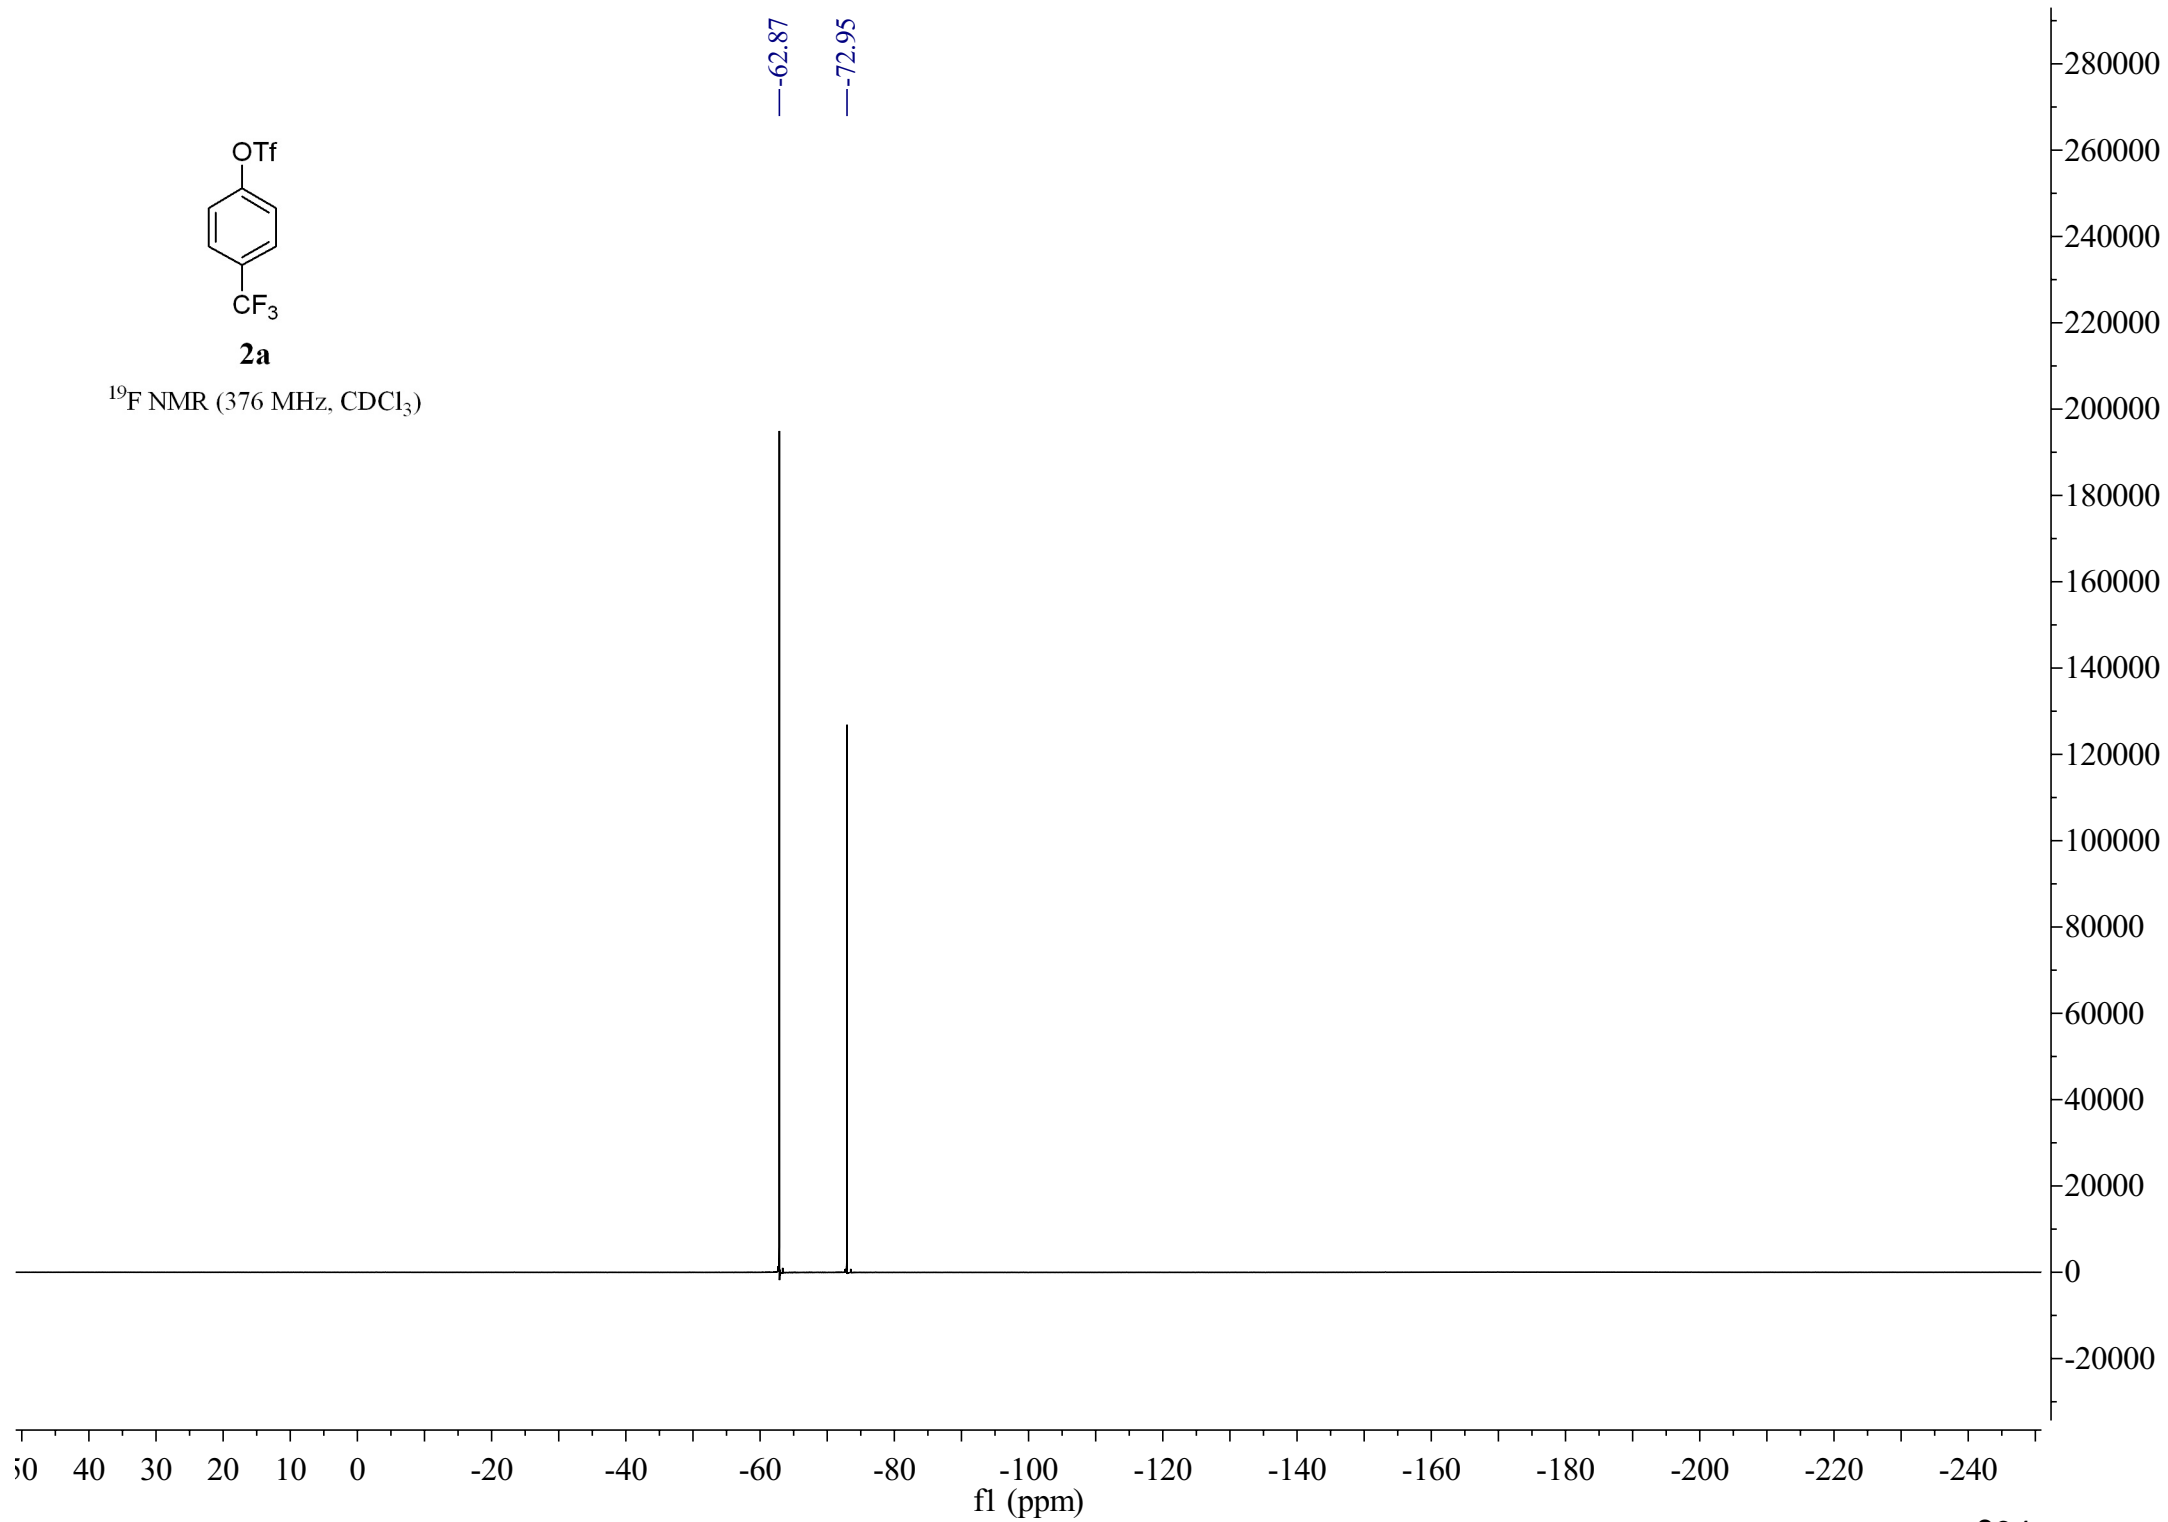

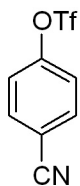

**2b**

$^1\text{H NMR}$  (400 MHz,  $\text{CDCl}_3$ )

7.82  
7.81  
7.81  
7.79  
7.79  
7.78  
7.45  
7.44  
7.44  
7.43  
7.42  
7.41

1.99

2.00

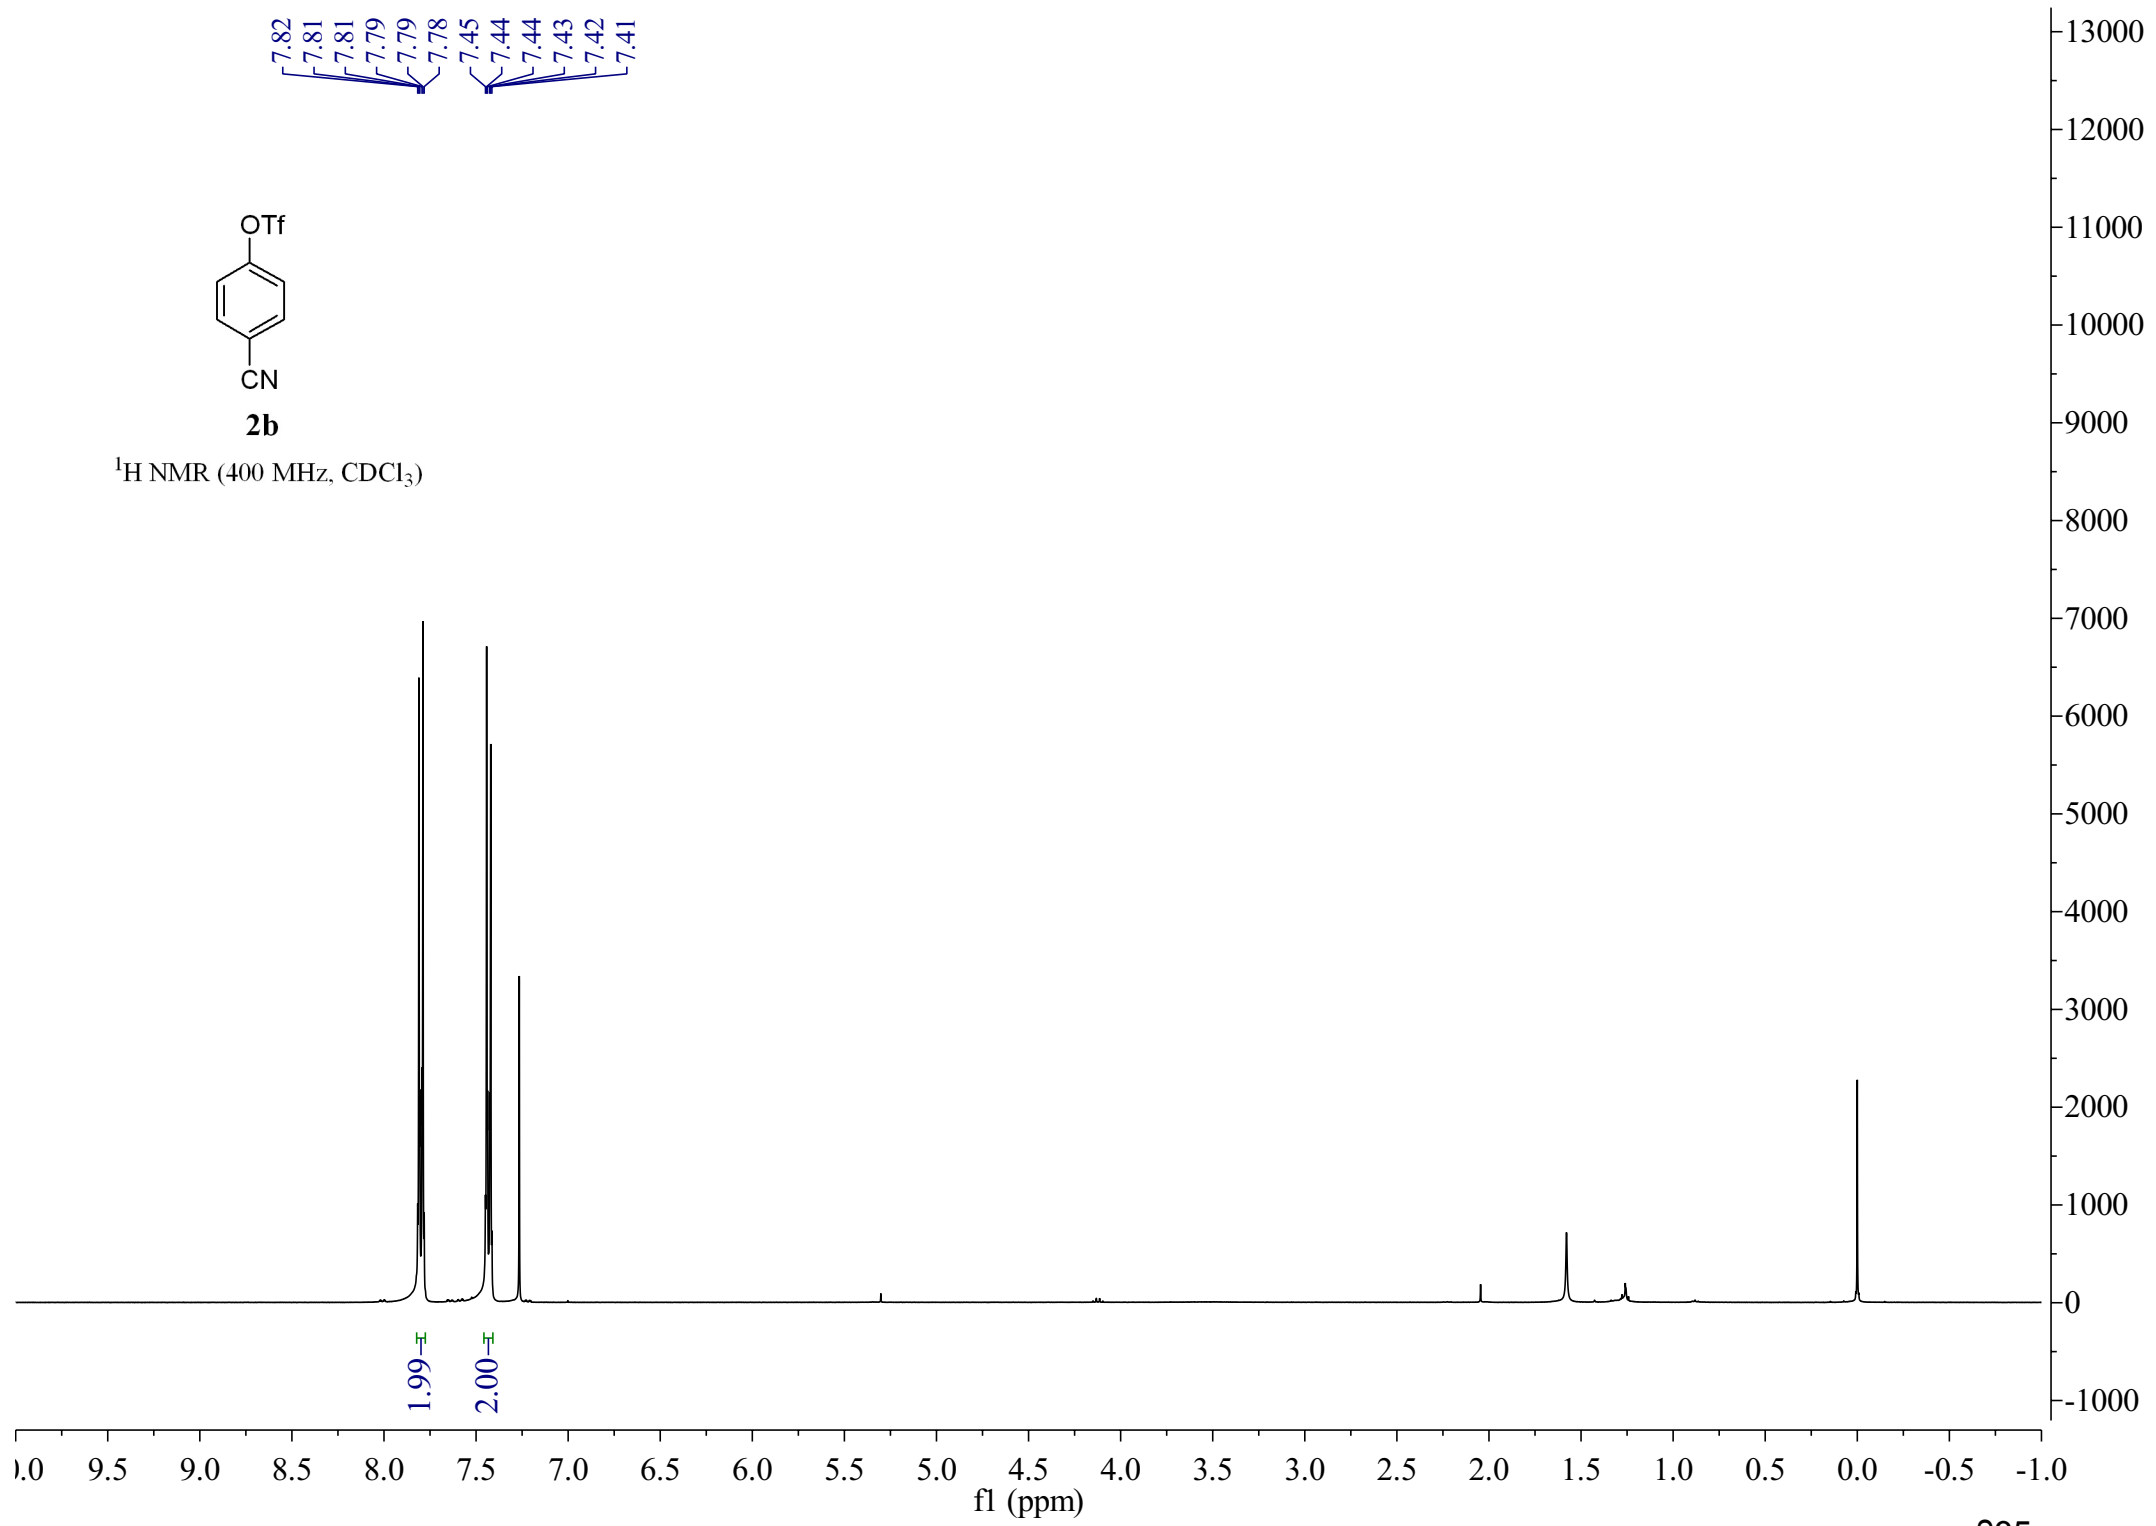

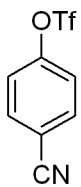

**2b**

$^{19}\text{F}$  NMR (376 MHz,  $\text{CDCl}_3$ )

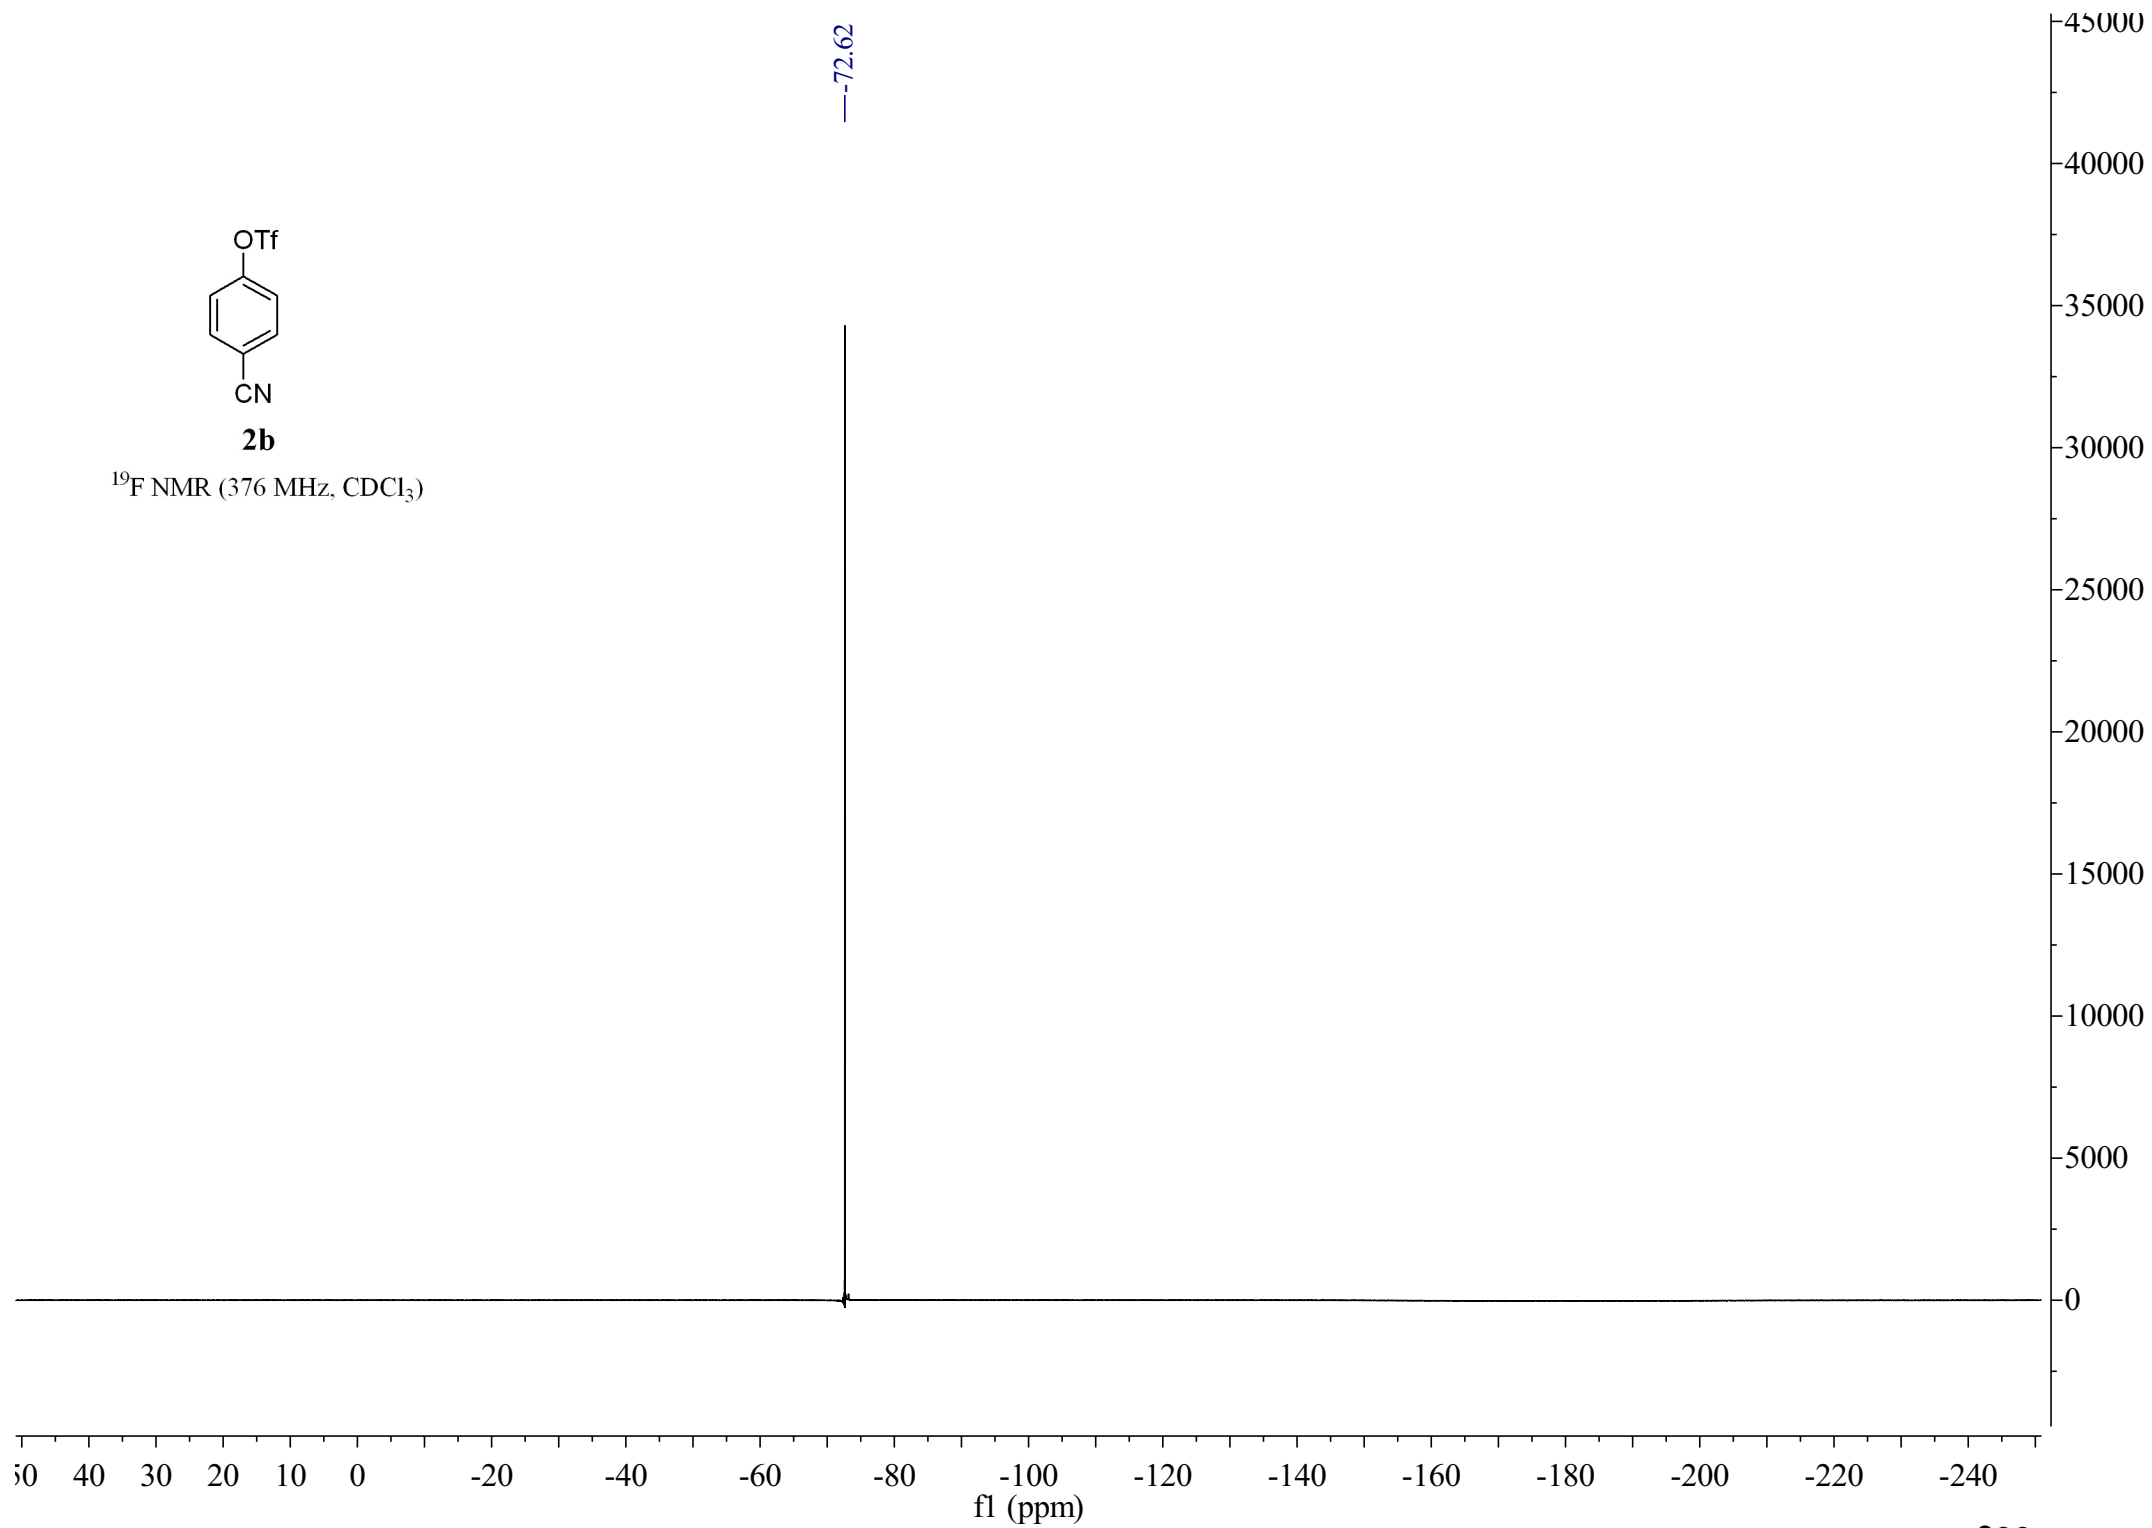

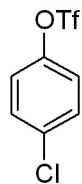

**2c**

<sup>1</sup>H NMR (400 MHz, CDCl<sub>3</sub>)

7.43  
7.42  
7.42  
7.41  
7.40  
7.39  
7.25  
7.24  
7.23  
7.22  
7.21  
7.21  
7.20

2.00  
1.99

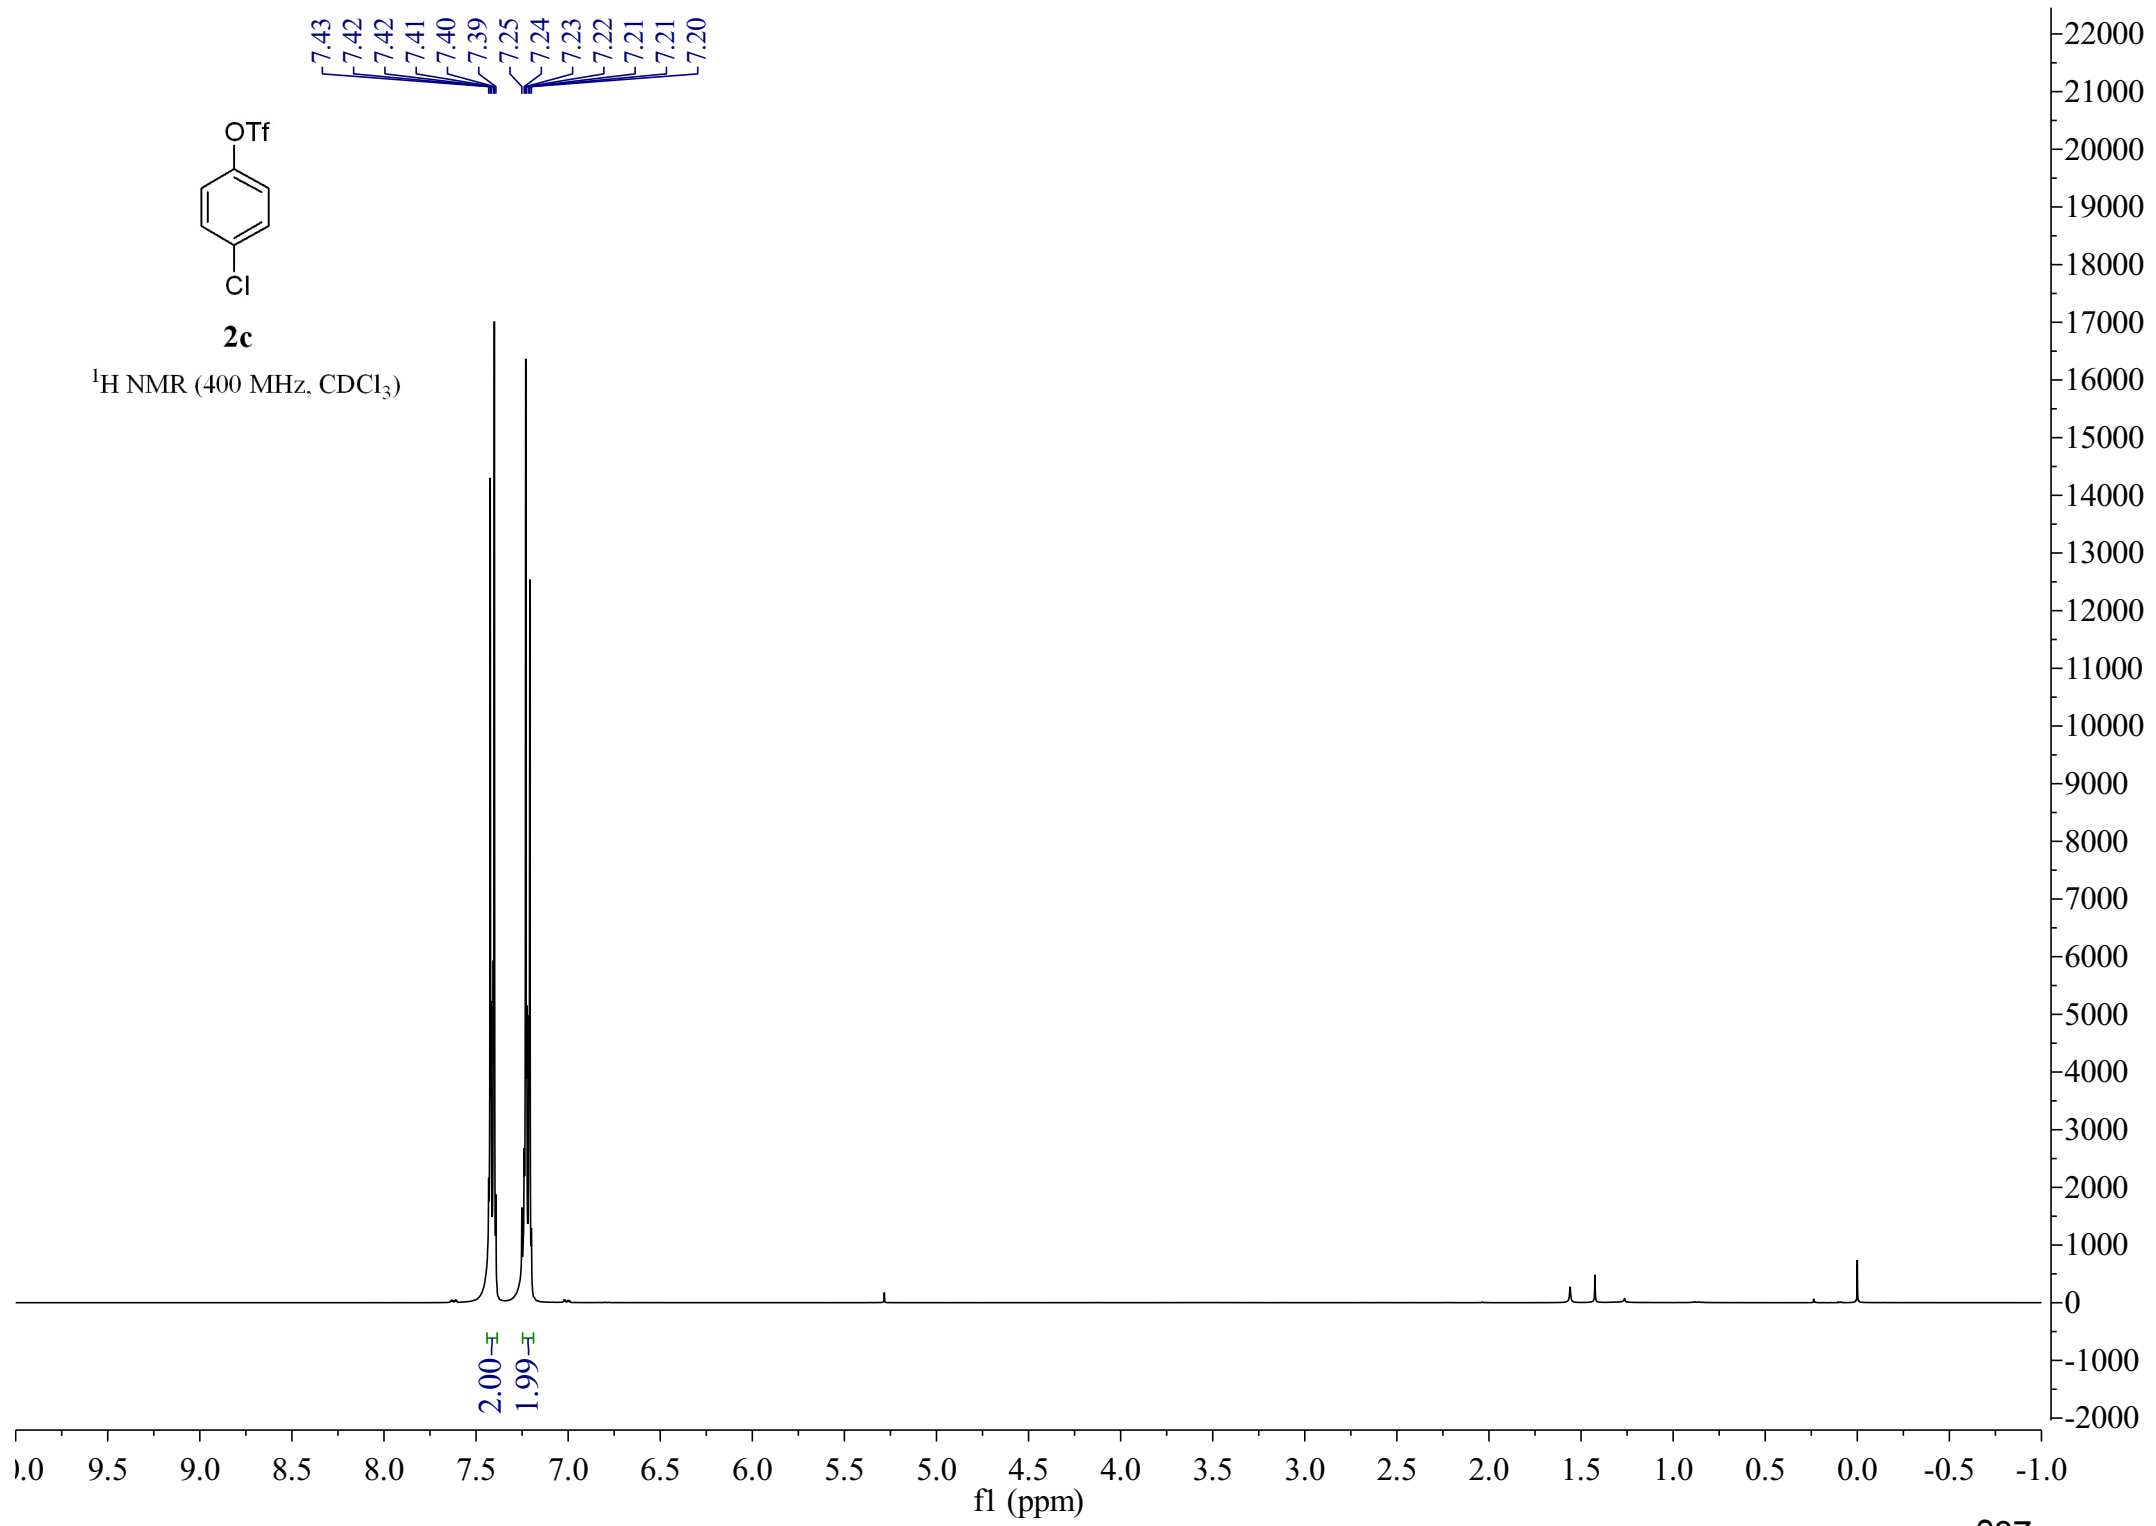

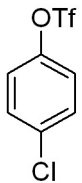

**2c**

<sup>19</sup>F NMR (376 MHz, CDCl<sub>3</sub>)

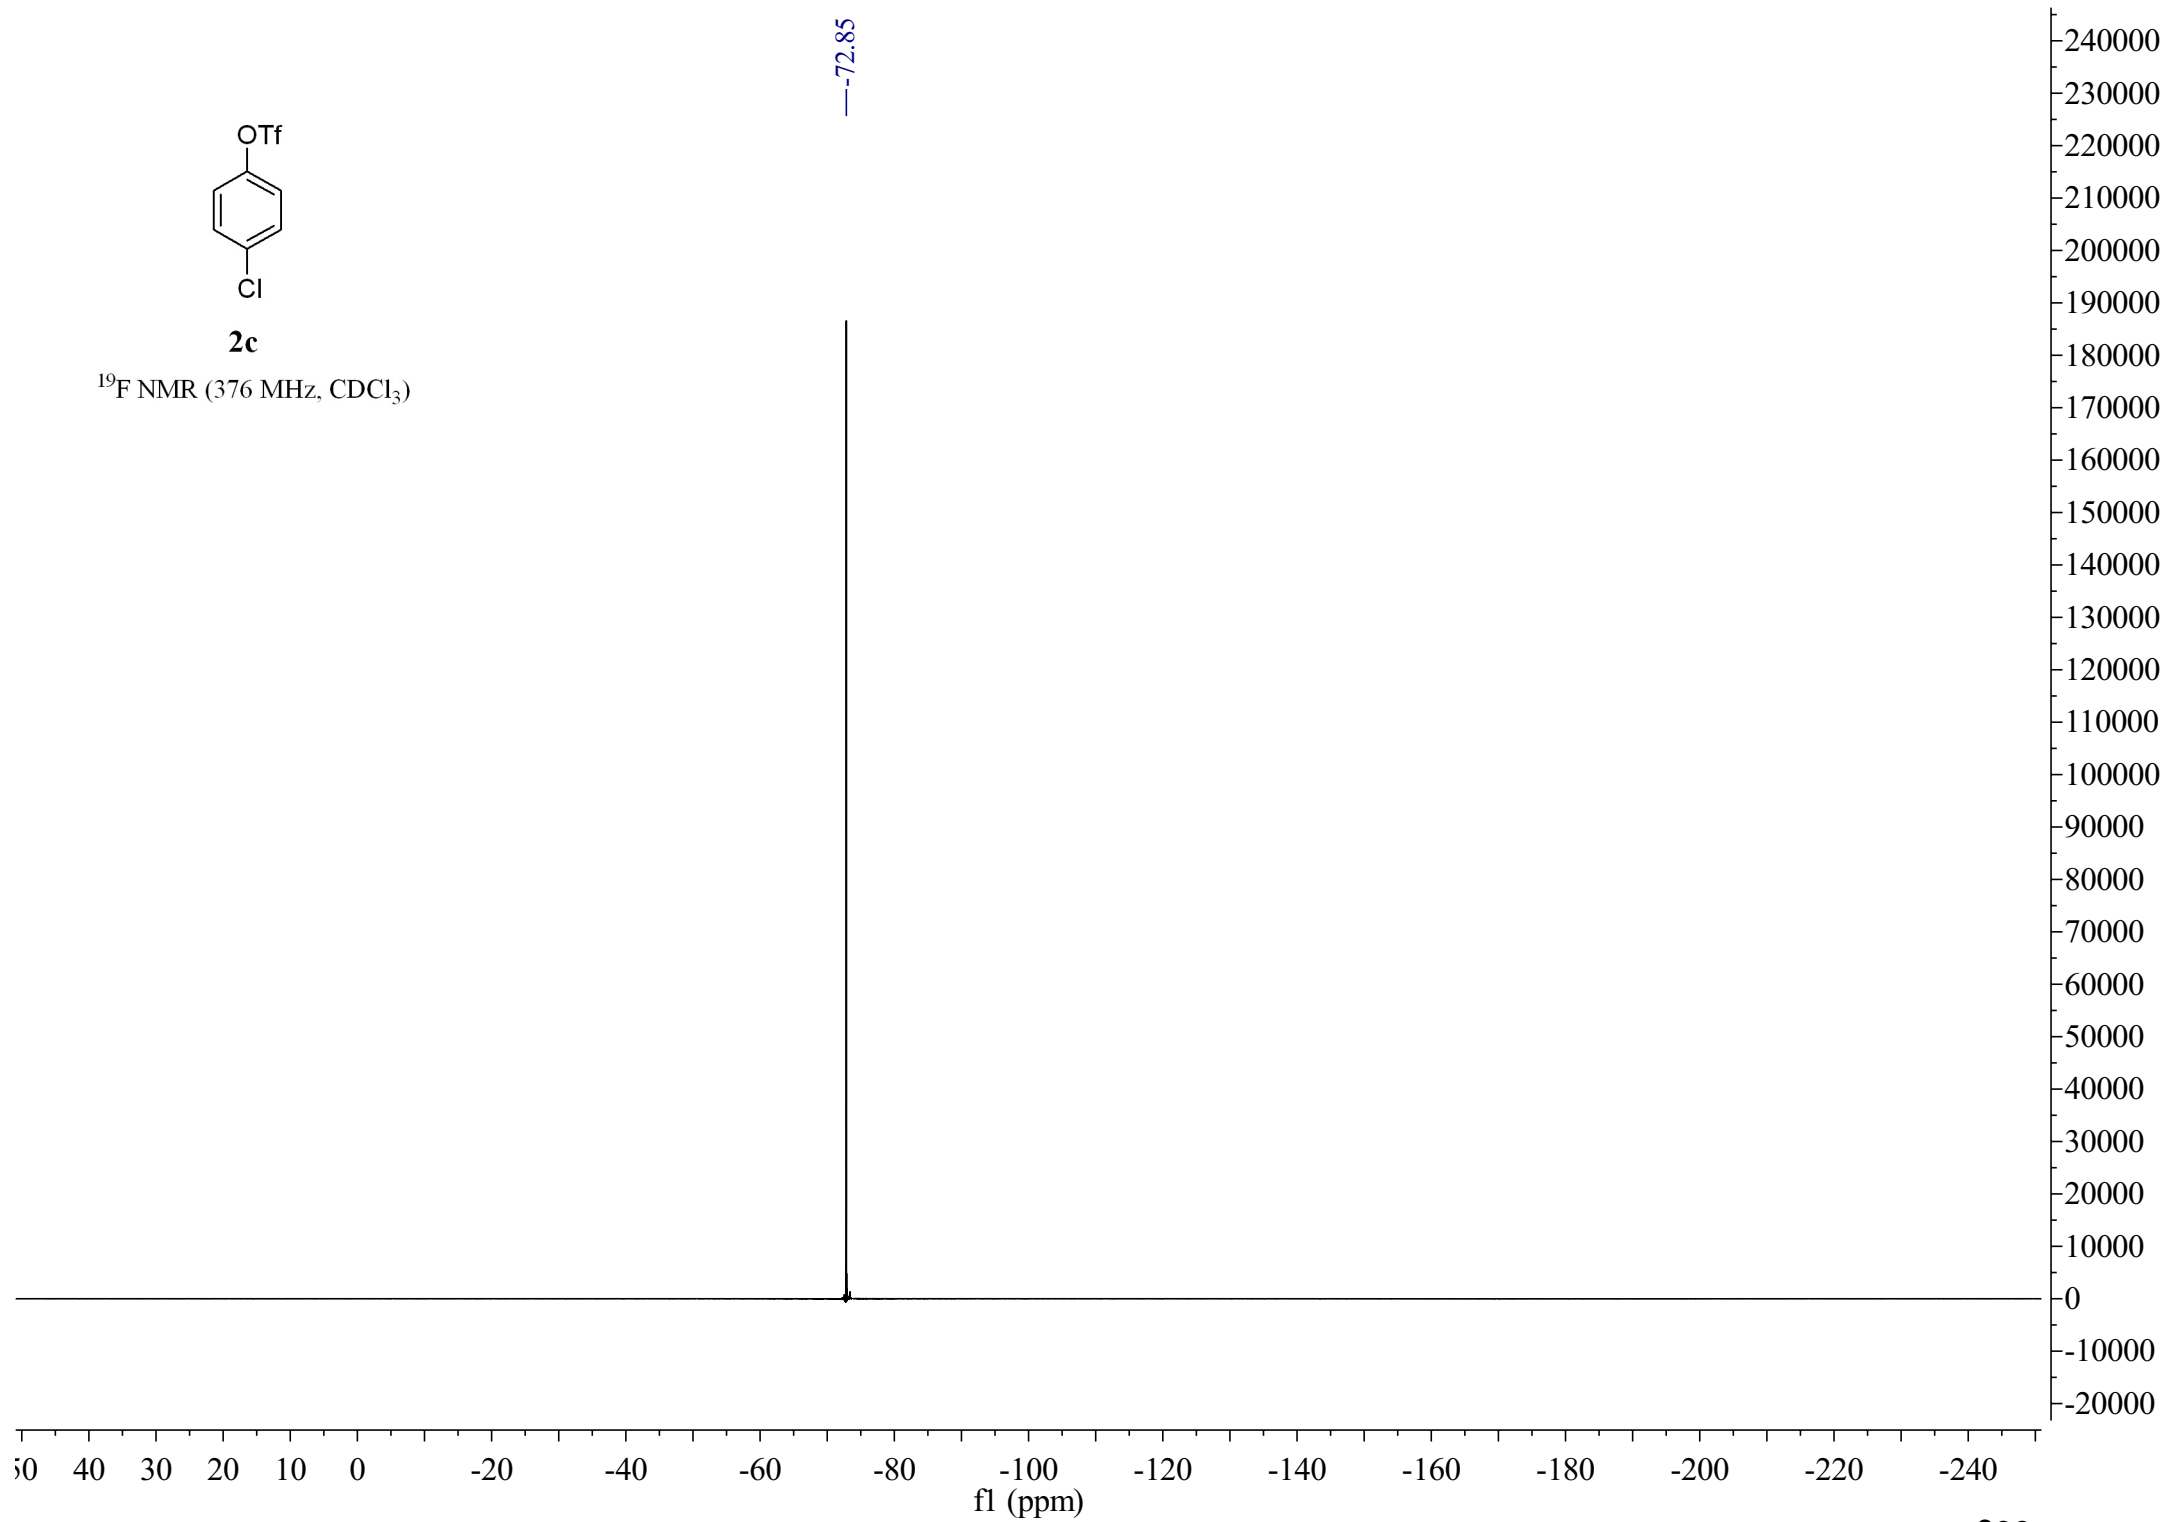

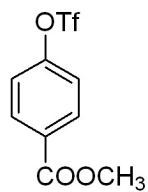

**2d**

<sup>1</sup>H NMR (400 MHz, CDCl<sub>3</sub>)

8.16  
8.15  
8.14  
8.13

7.37  
7.35

3.94

2.02

2.00

3.02

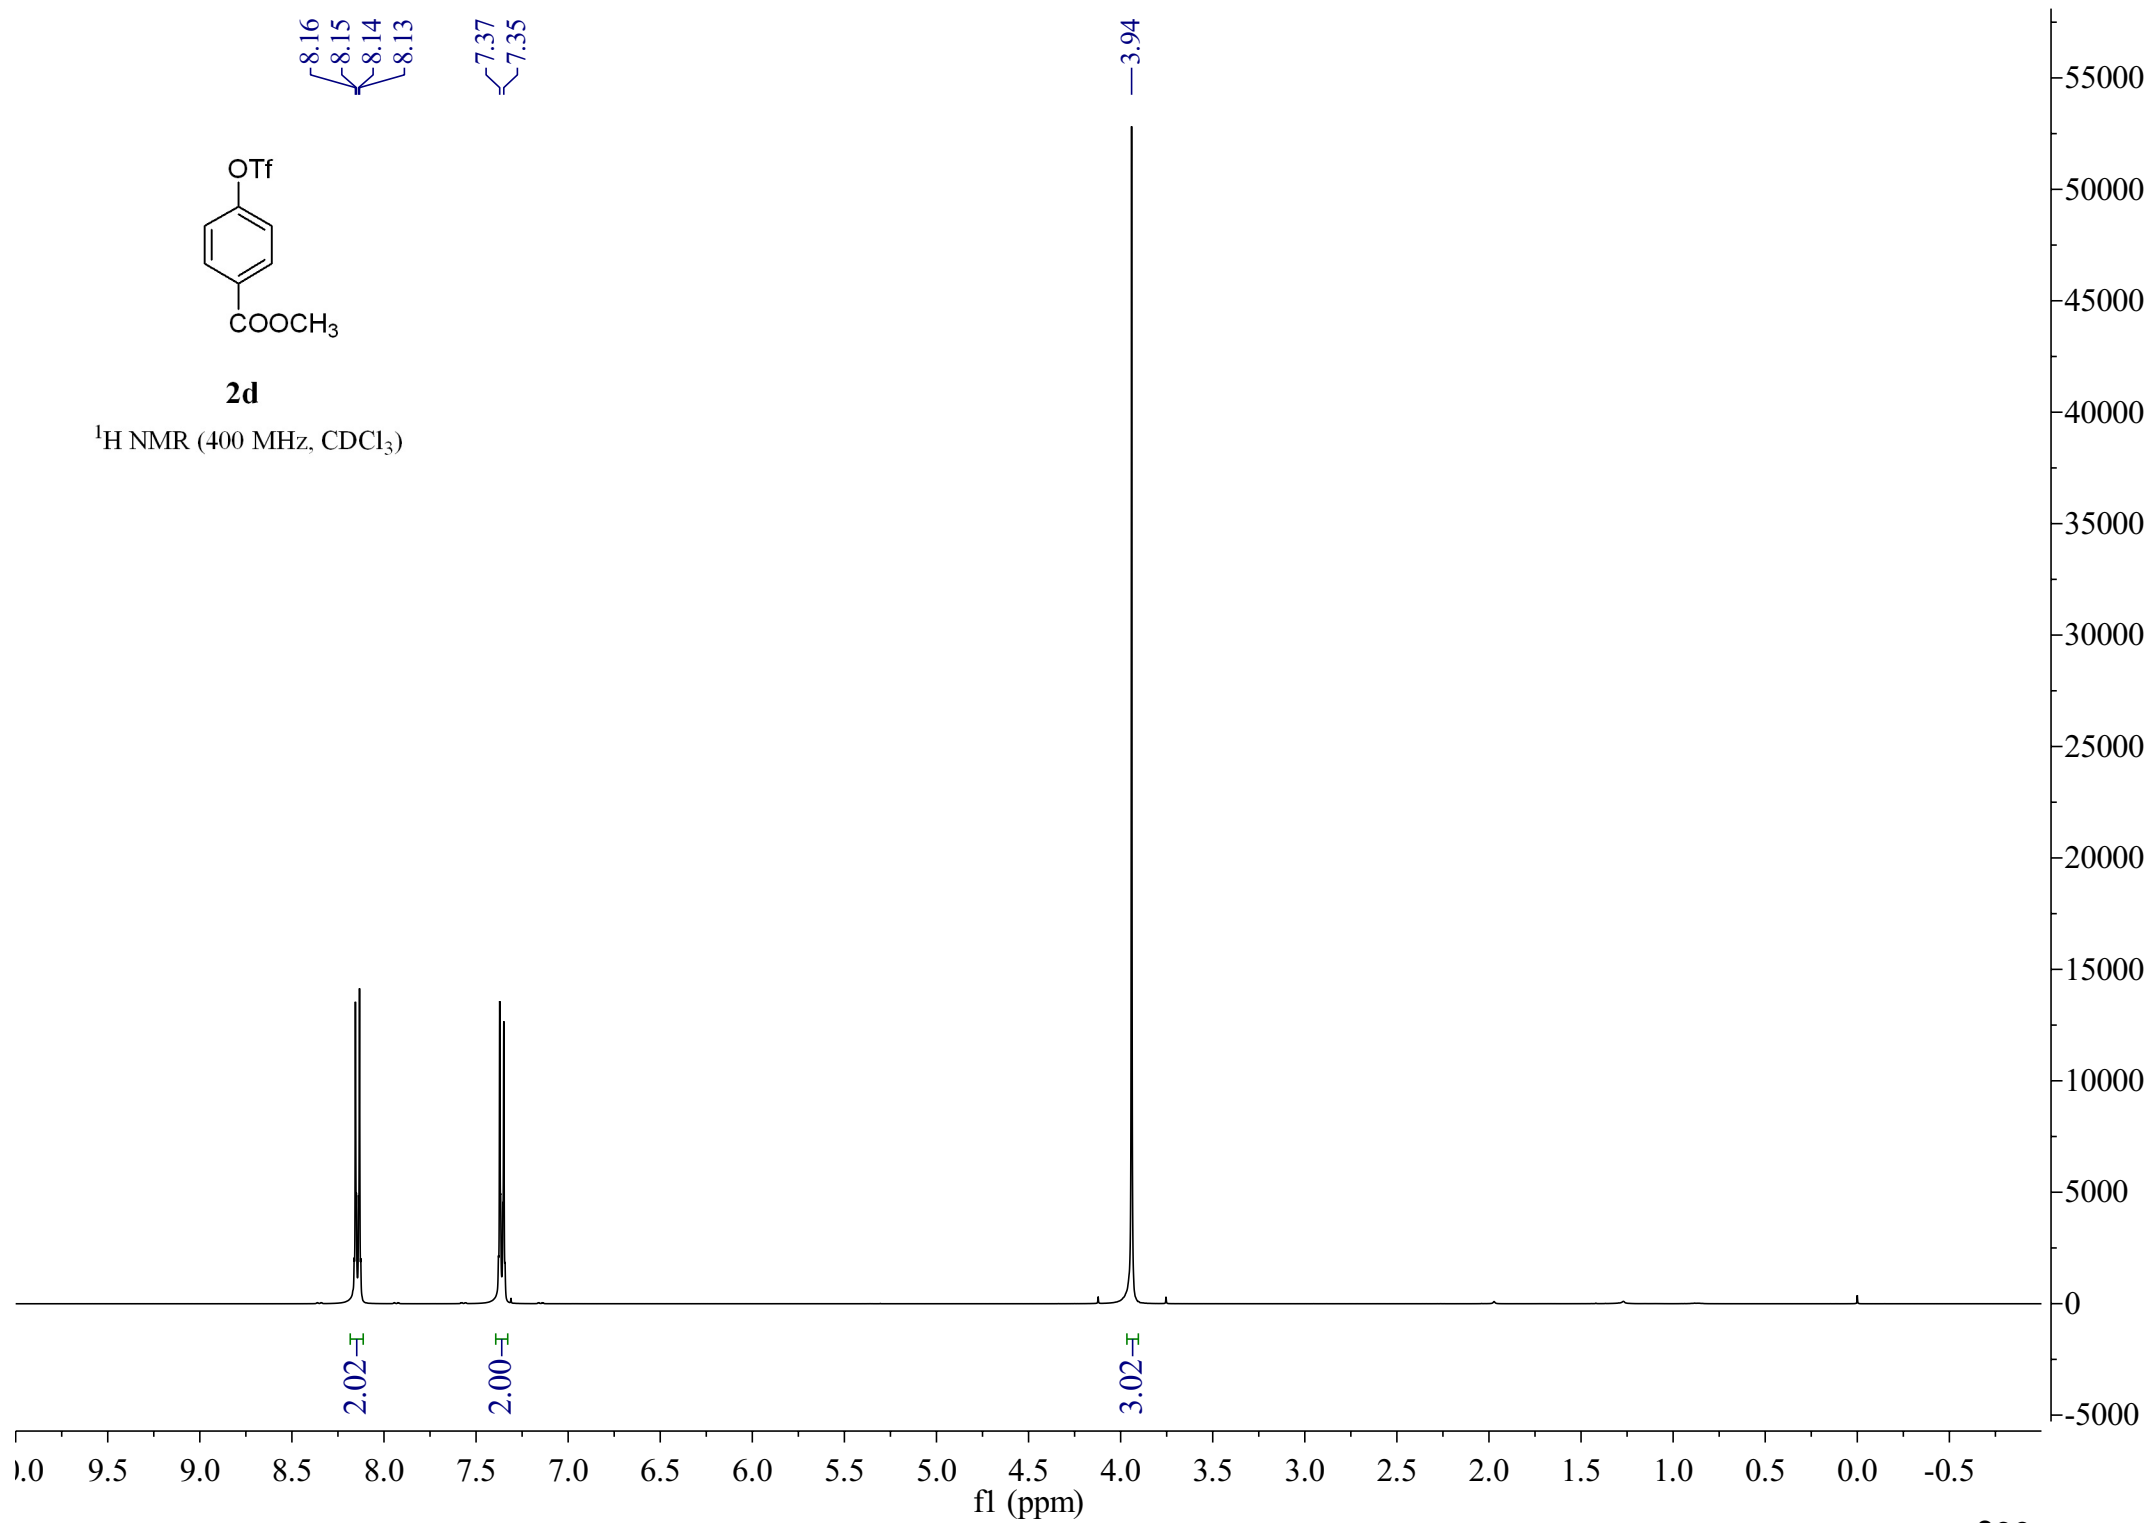

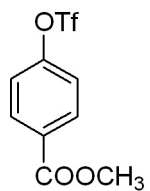

**2d**

<sup>19</sup>F NMR (376 MHz, CDCl<sub>3</sub>)

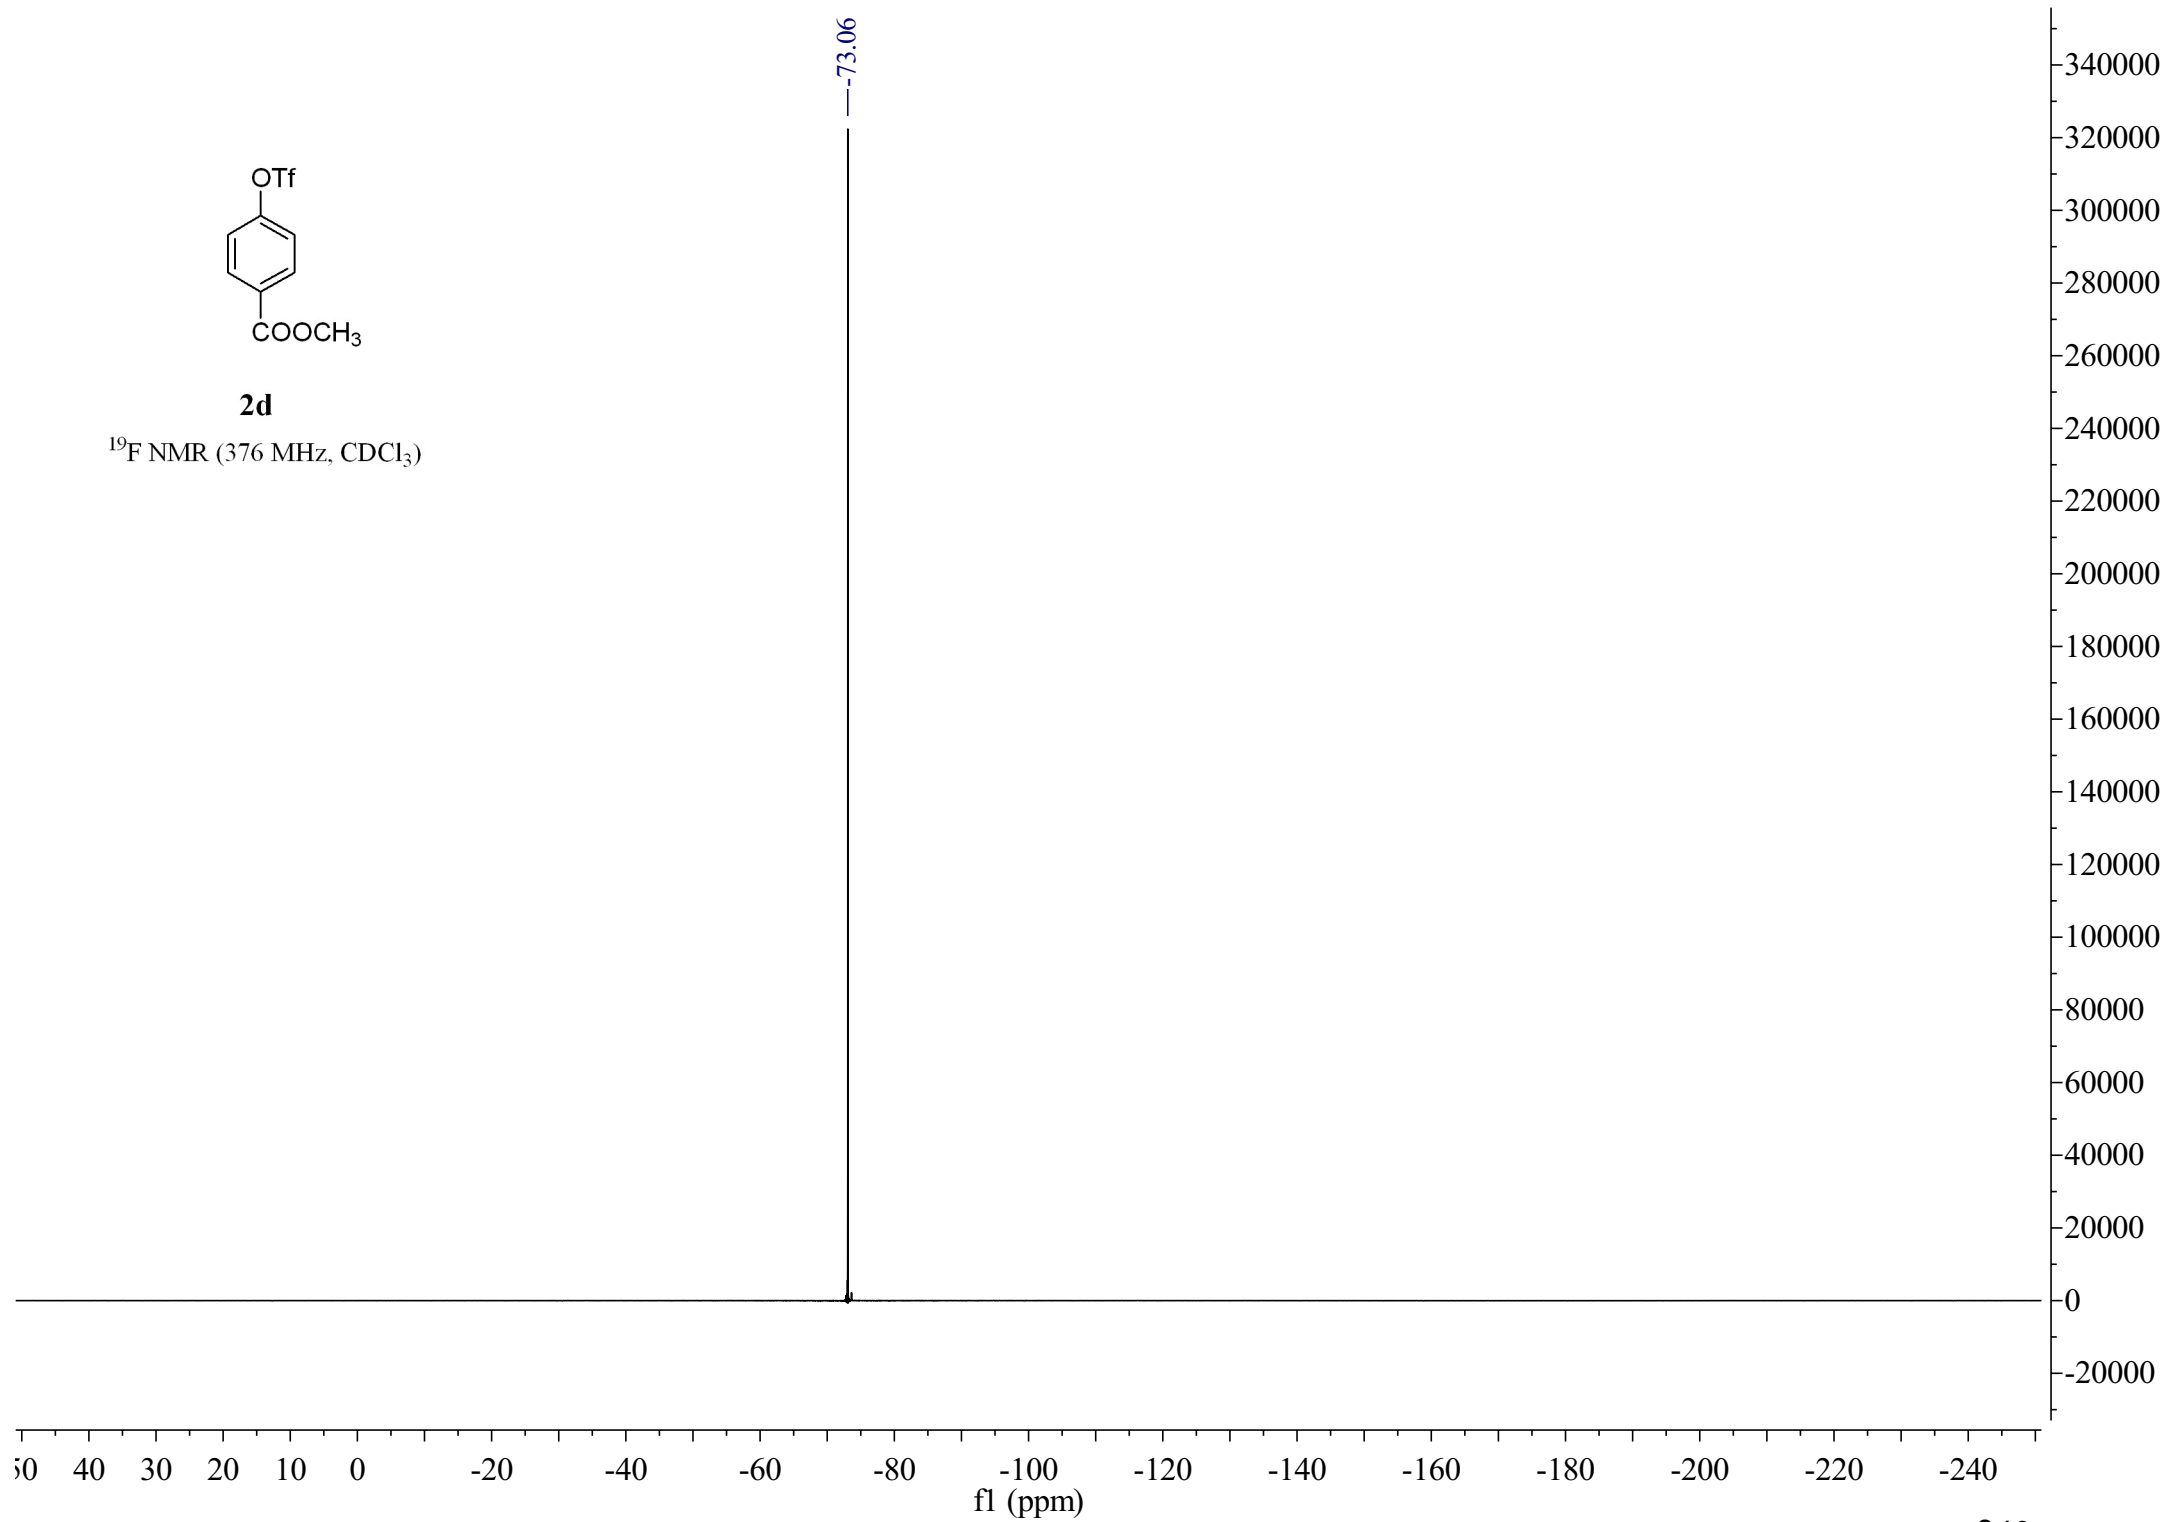



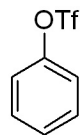

**2e**

$^1\text{H}$  NMR (400 MHz,  $\text{CDCl}_3$ )

7.44  
7.44  
7.43  
7.41  
7.40  
7.38  
7.36  
7.35  
7.34  
7.27  
7.25  
7.23

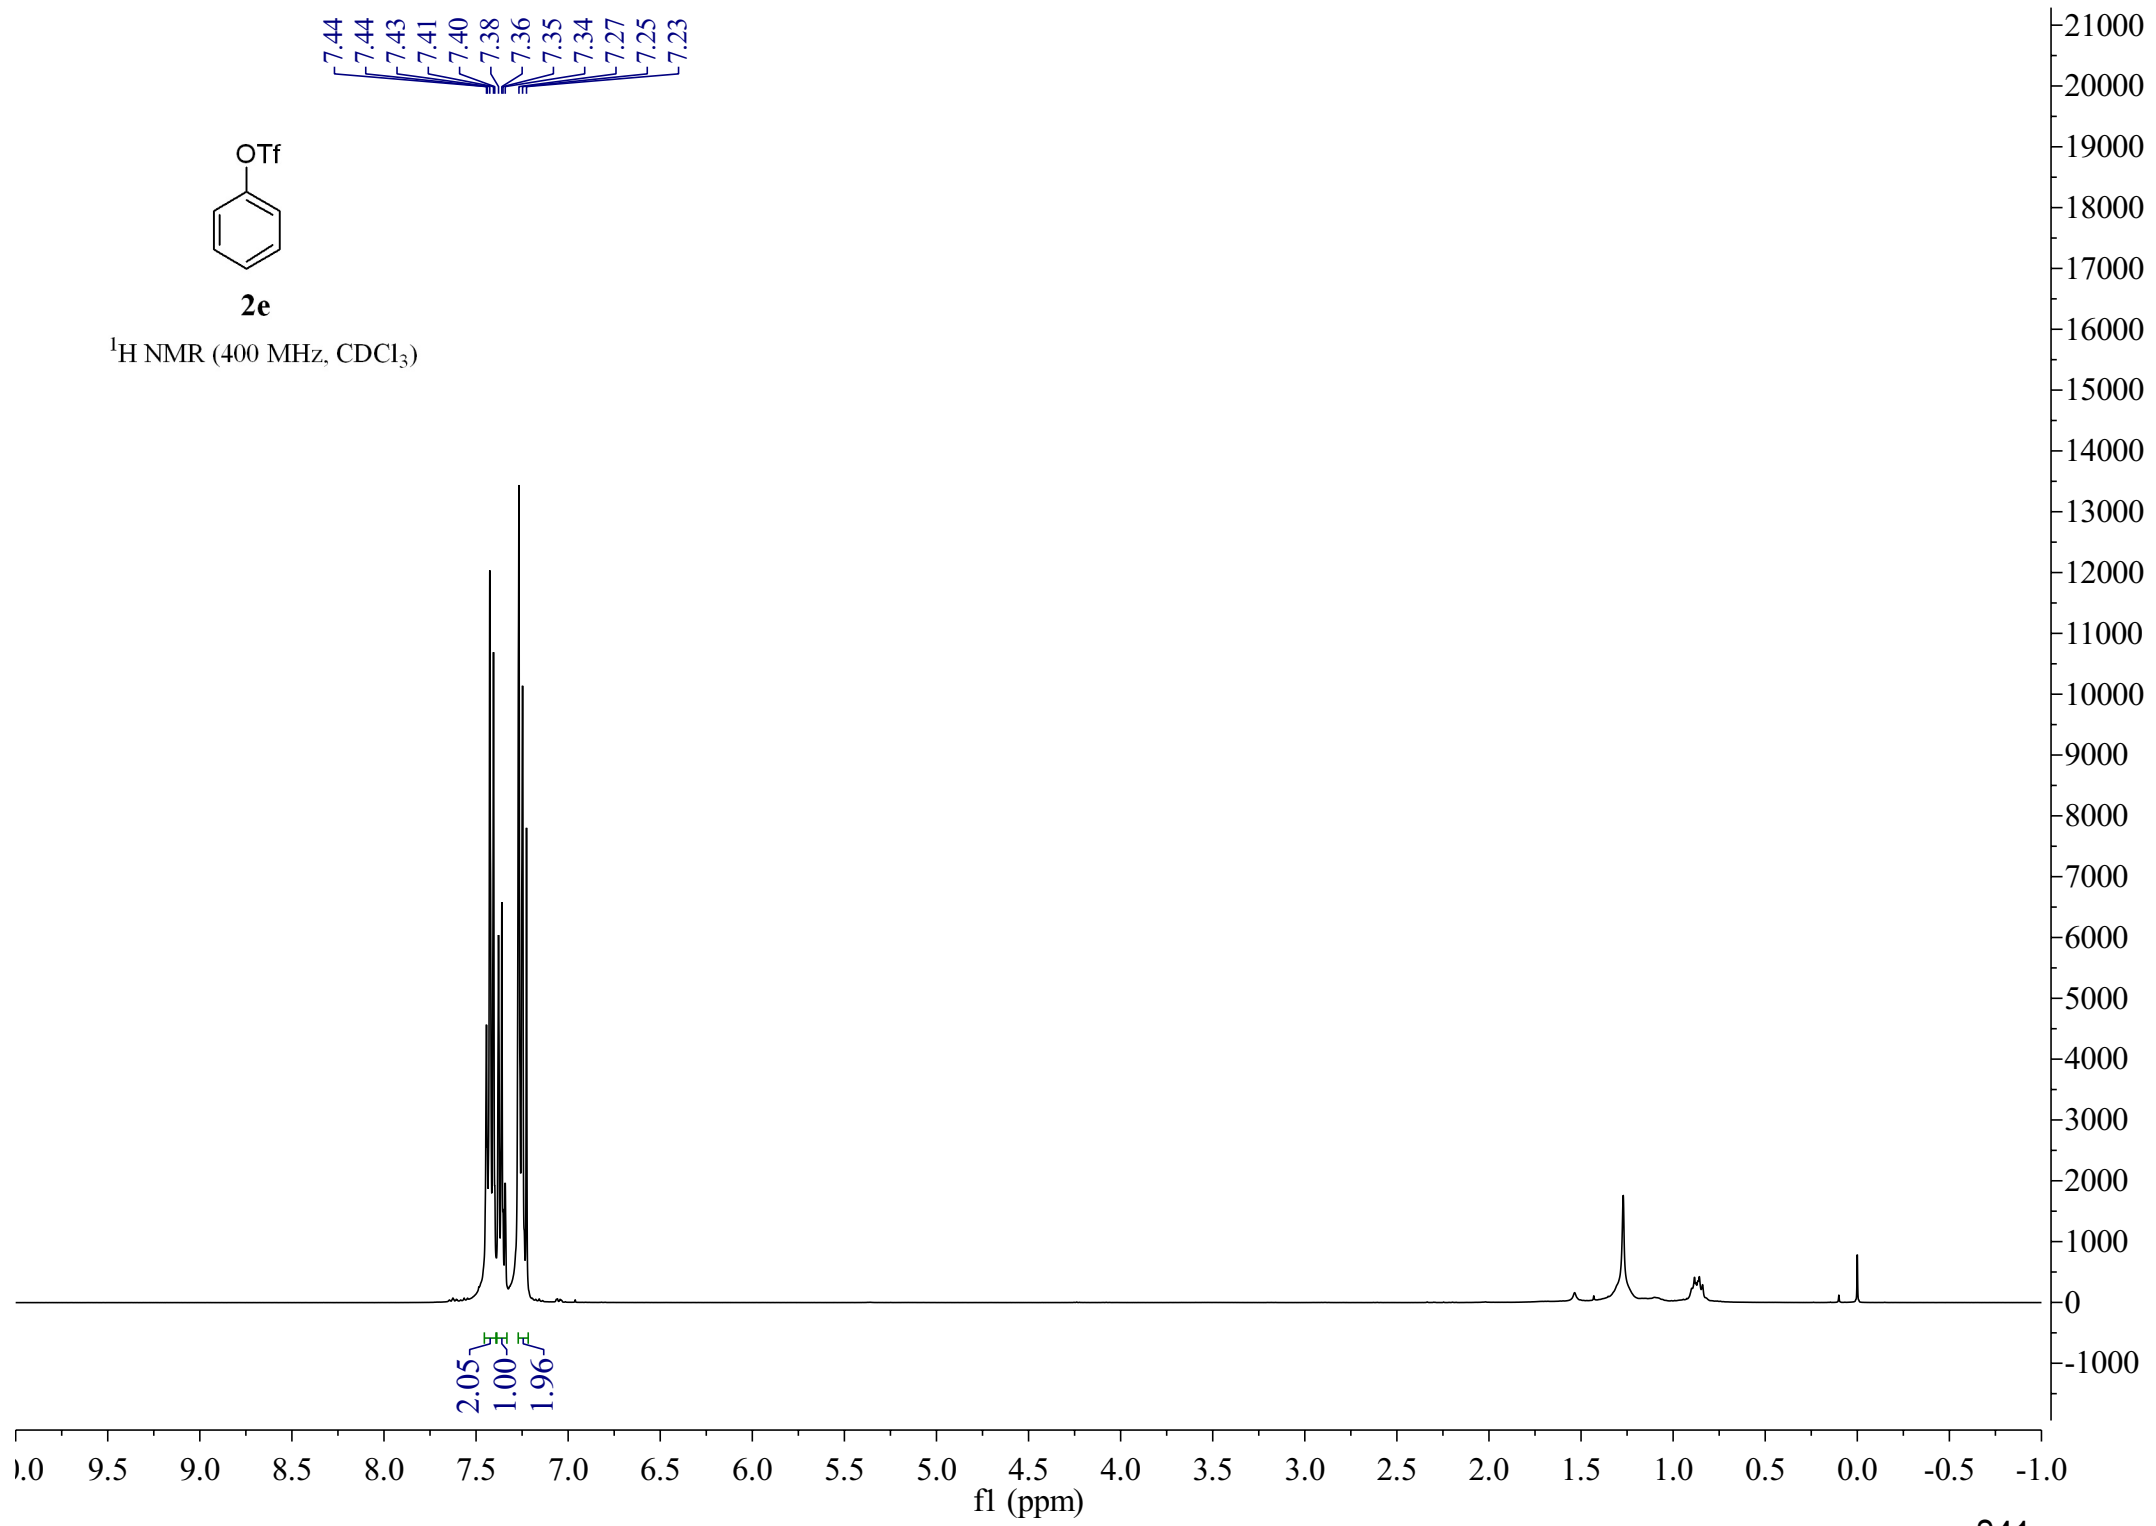

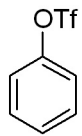

**2e**

$^{19}\text{F}$  NMR (376 MHz,  $\text{CDCl}_3$ )

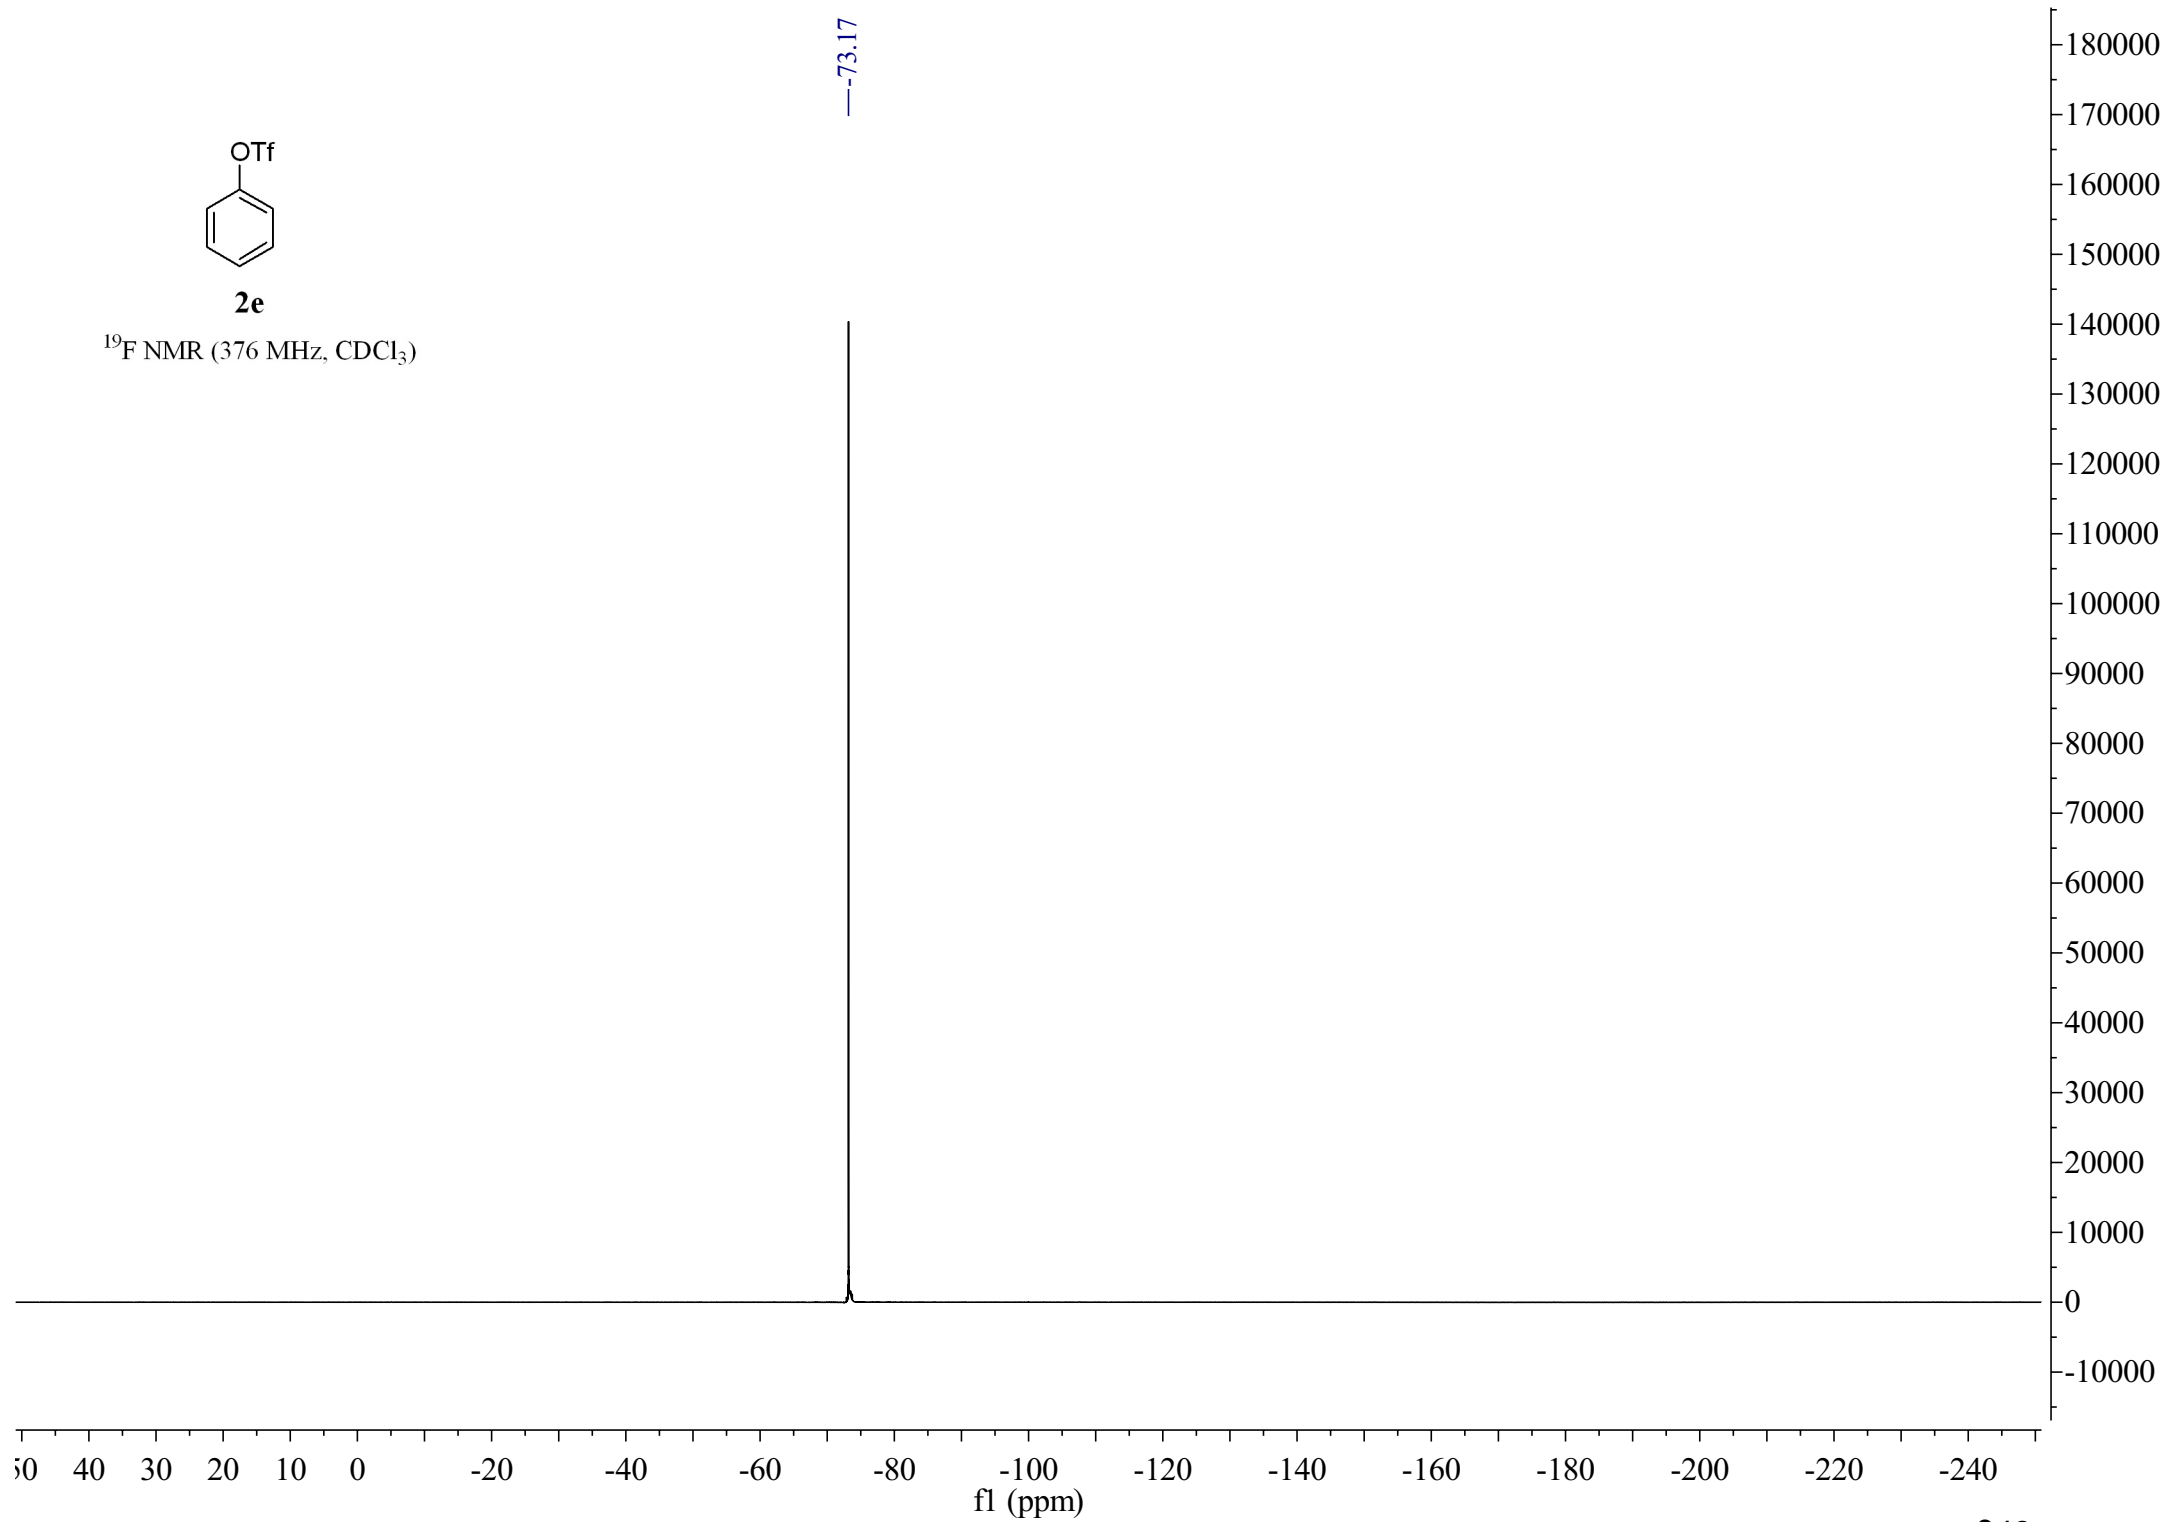

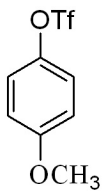

**2f**

$^1\text{H}$  NMR (400 MHz,  $\text{CDCl}_3$ )

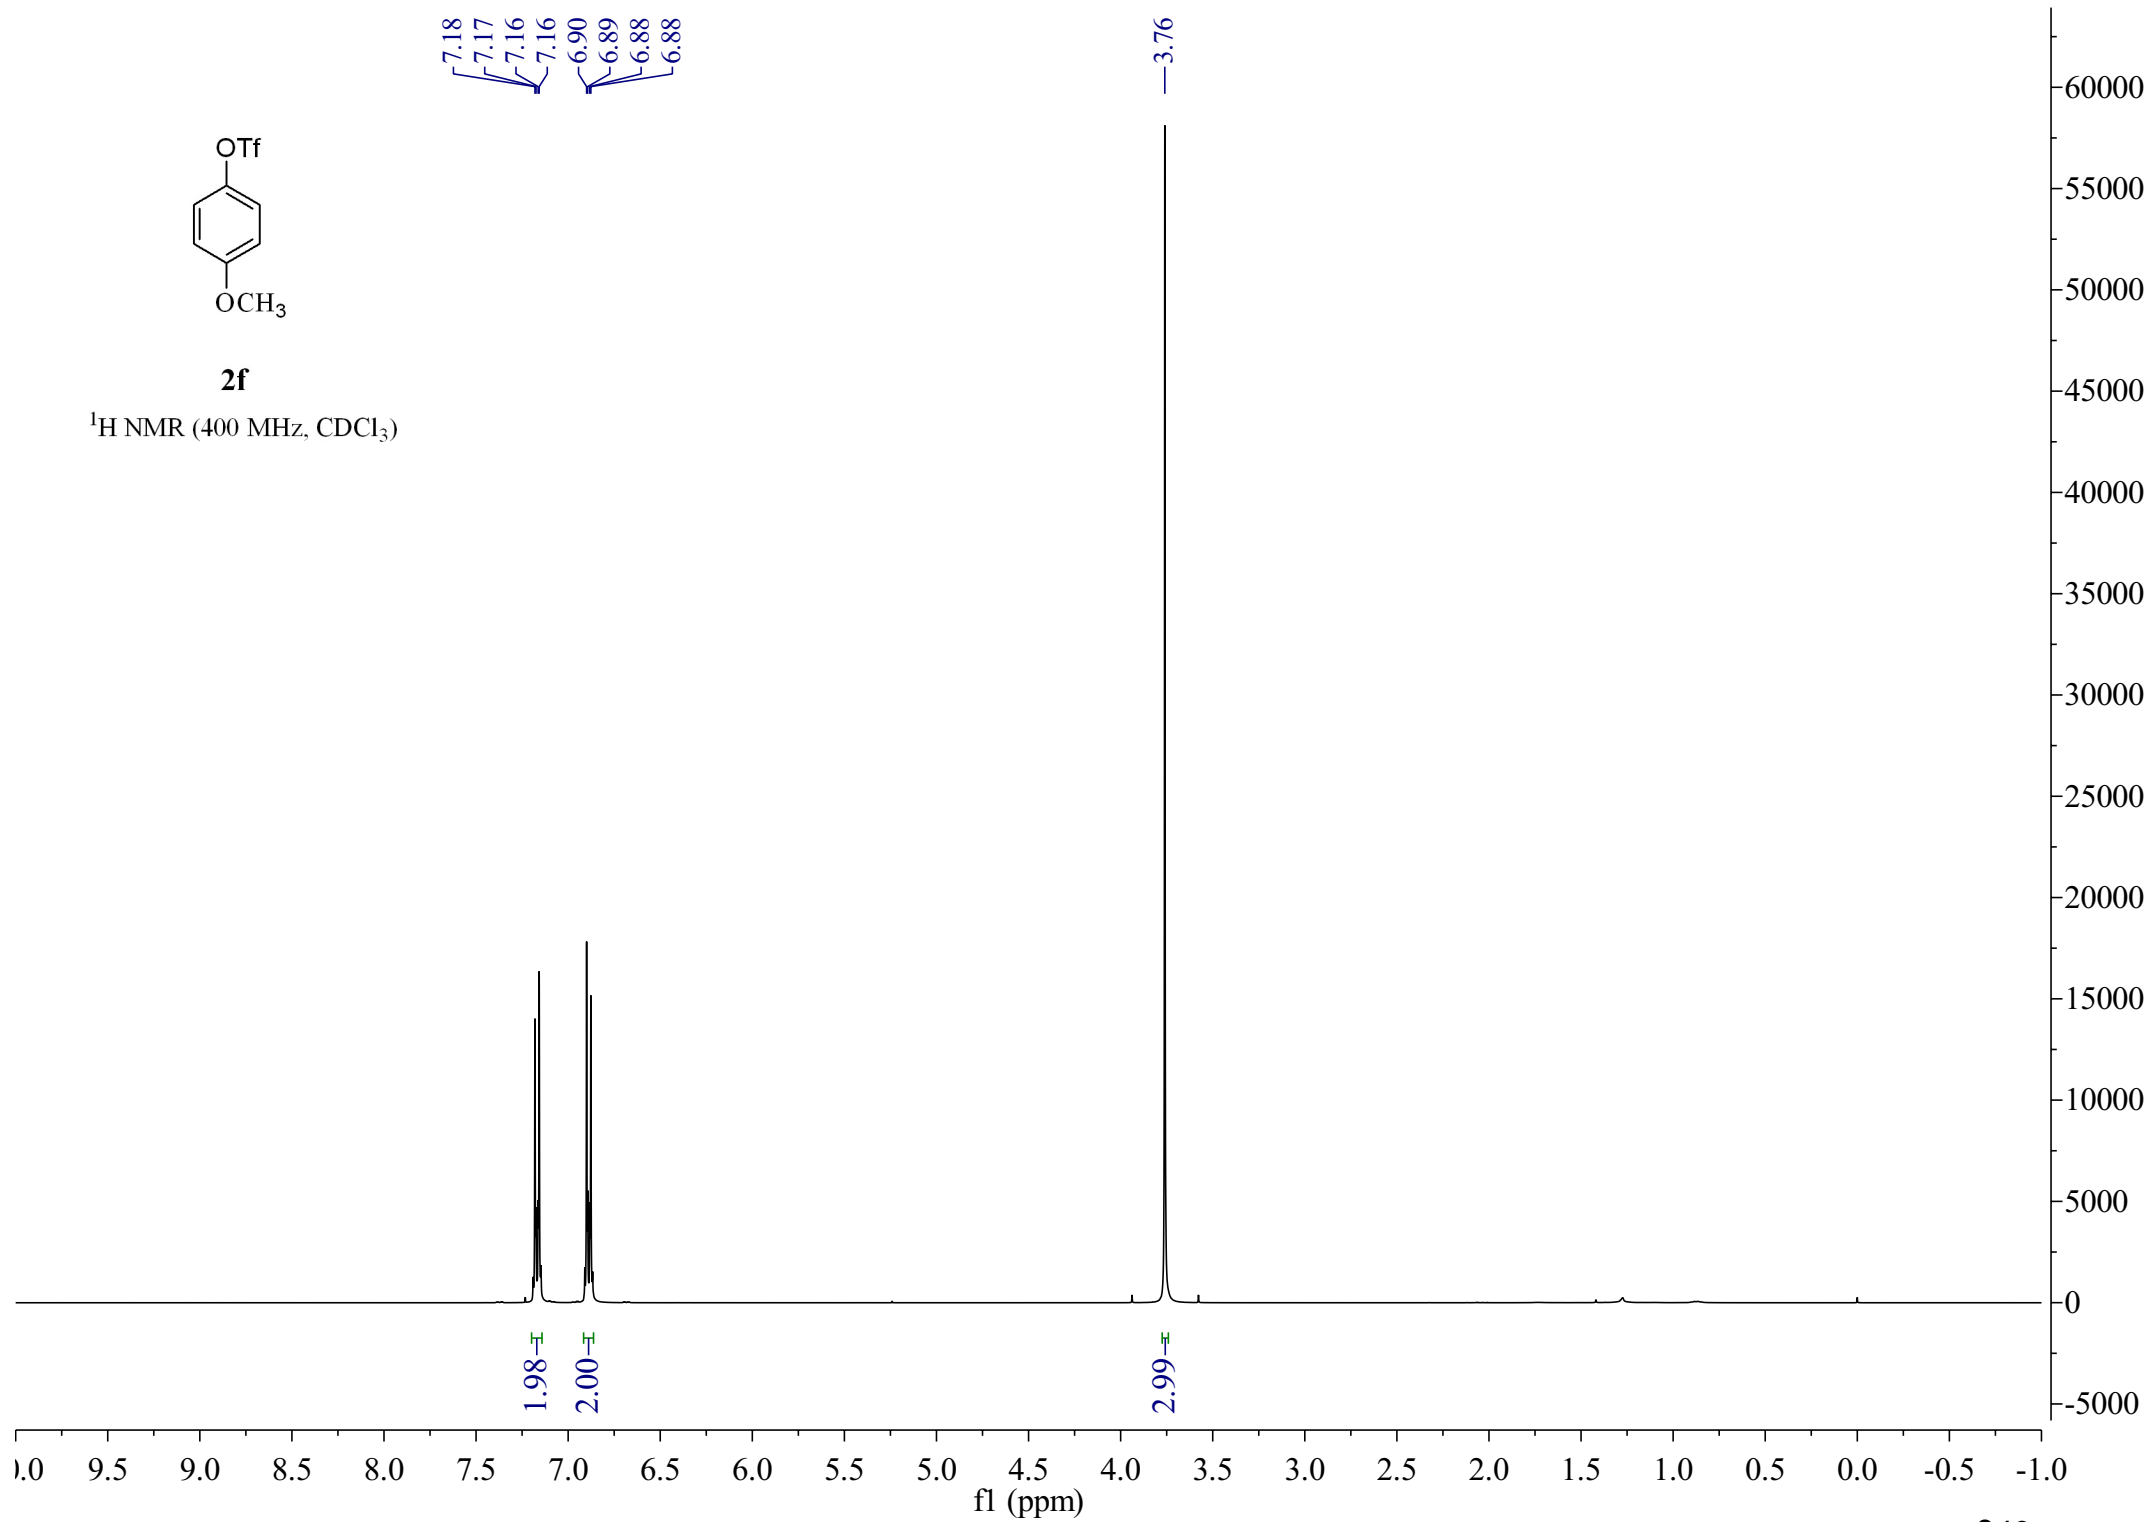

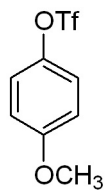

**2f**

<sup>19</sup>F NMR (376 MHz, CDCl<sub>3</sub>)

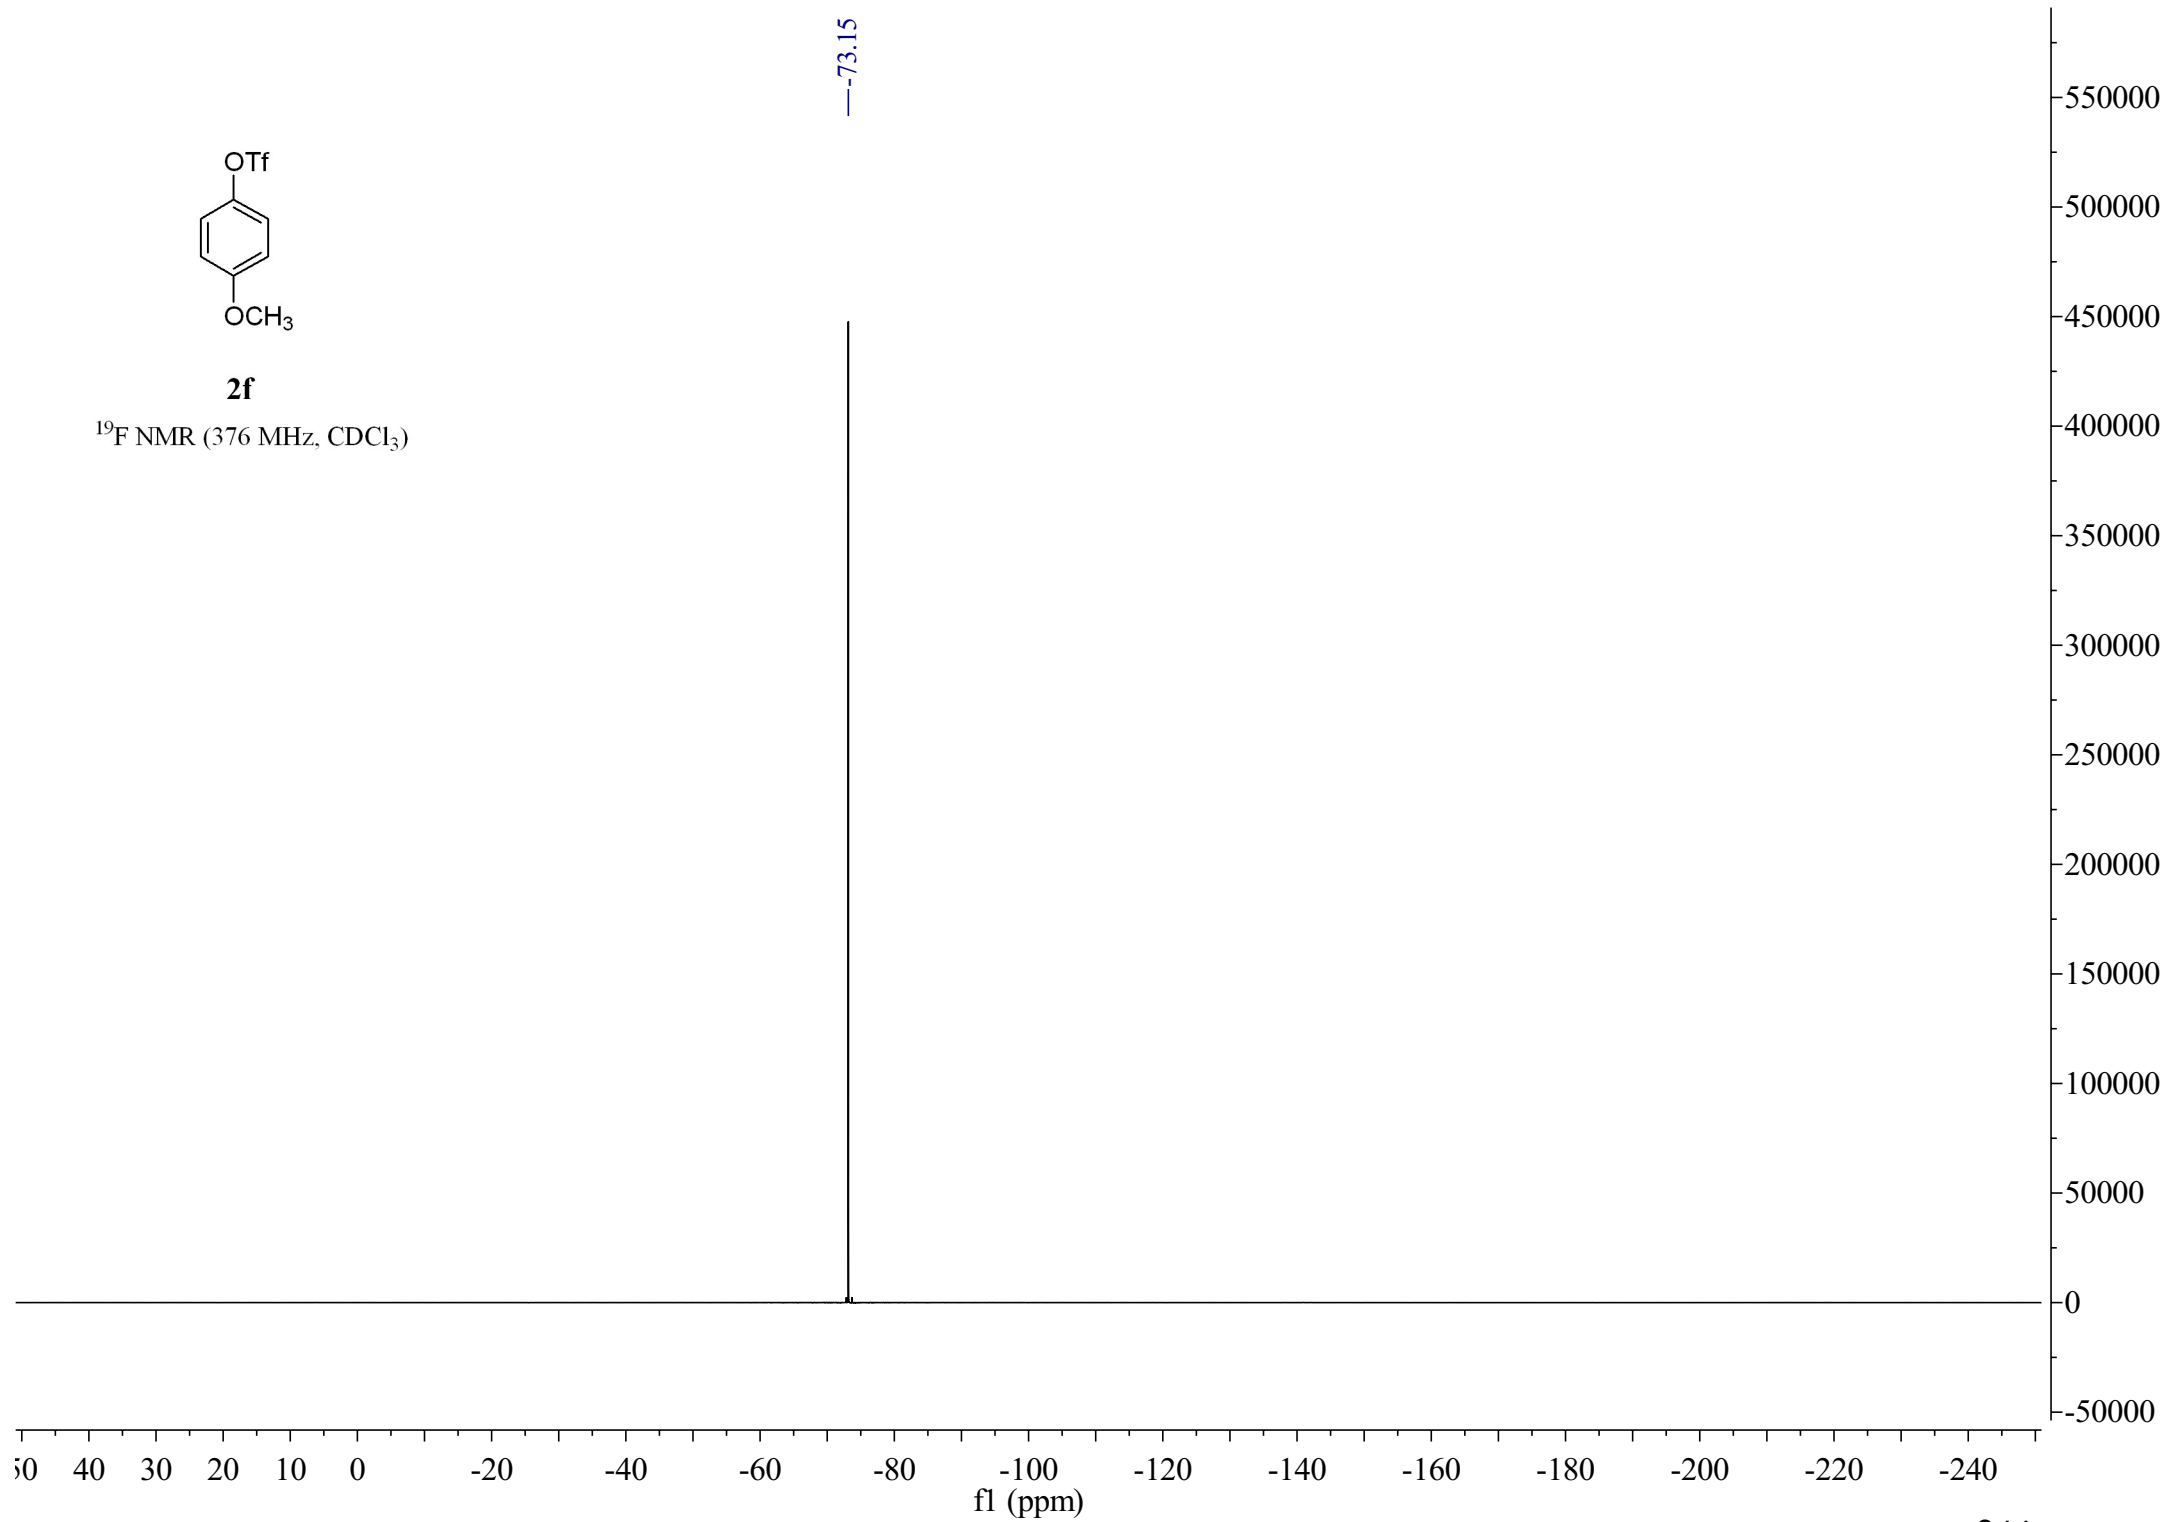

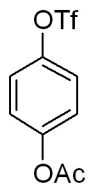

**2g**

<sup>1</sup>H NMR (400 MHz, CDCl<sub>3</sub>)

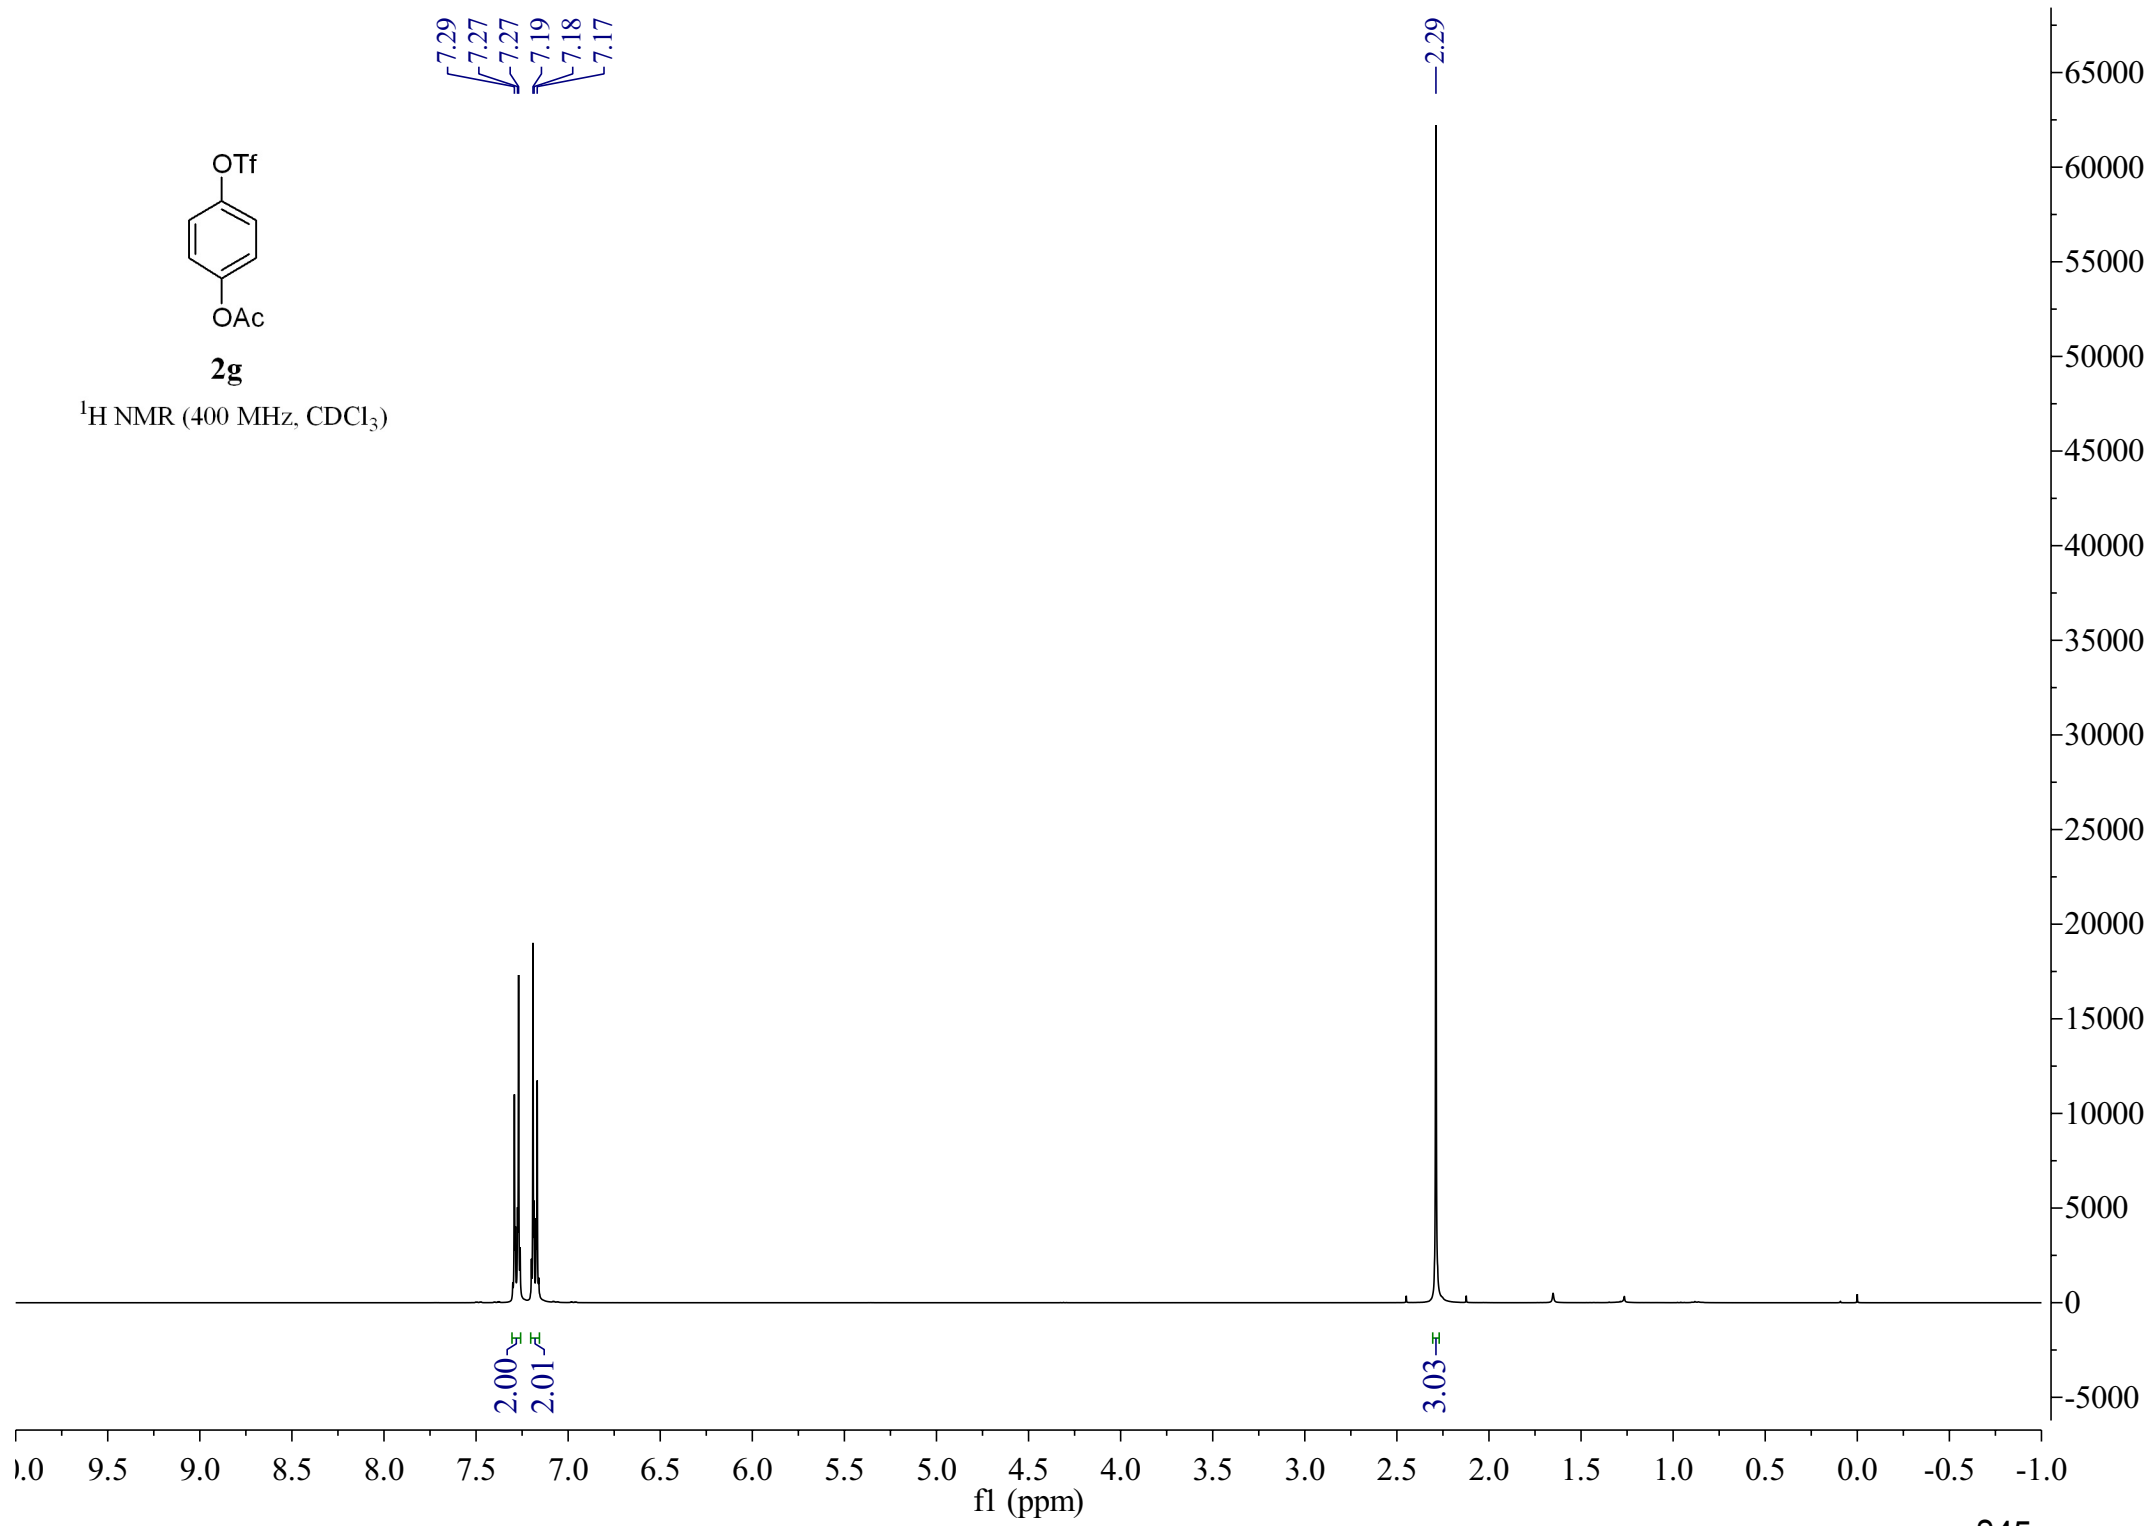

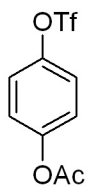

**2g**

<sup>19</sup>F NMR (376 MHz, CDCl<sub>3</sub>)

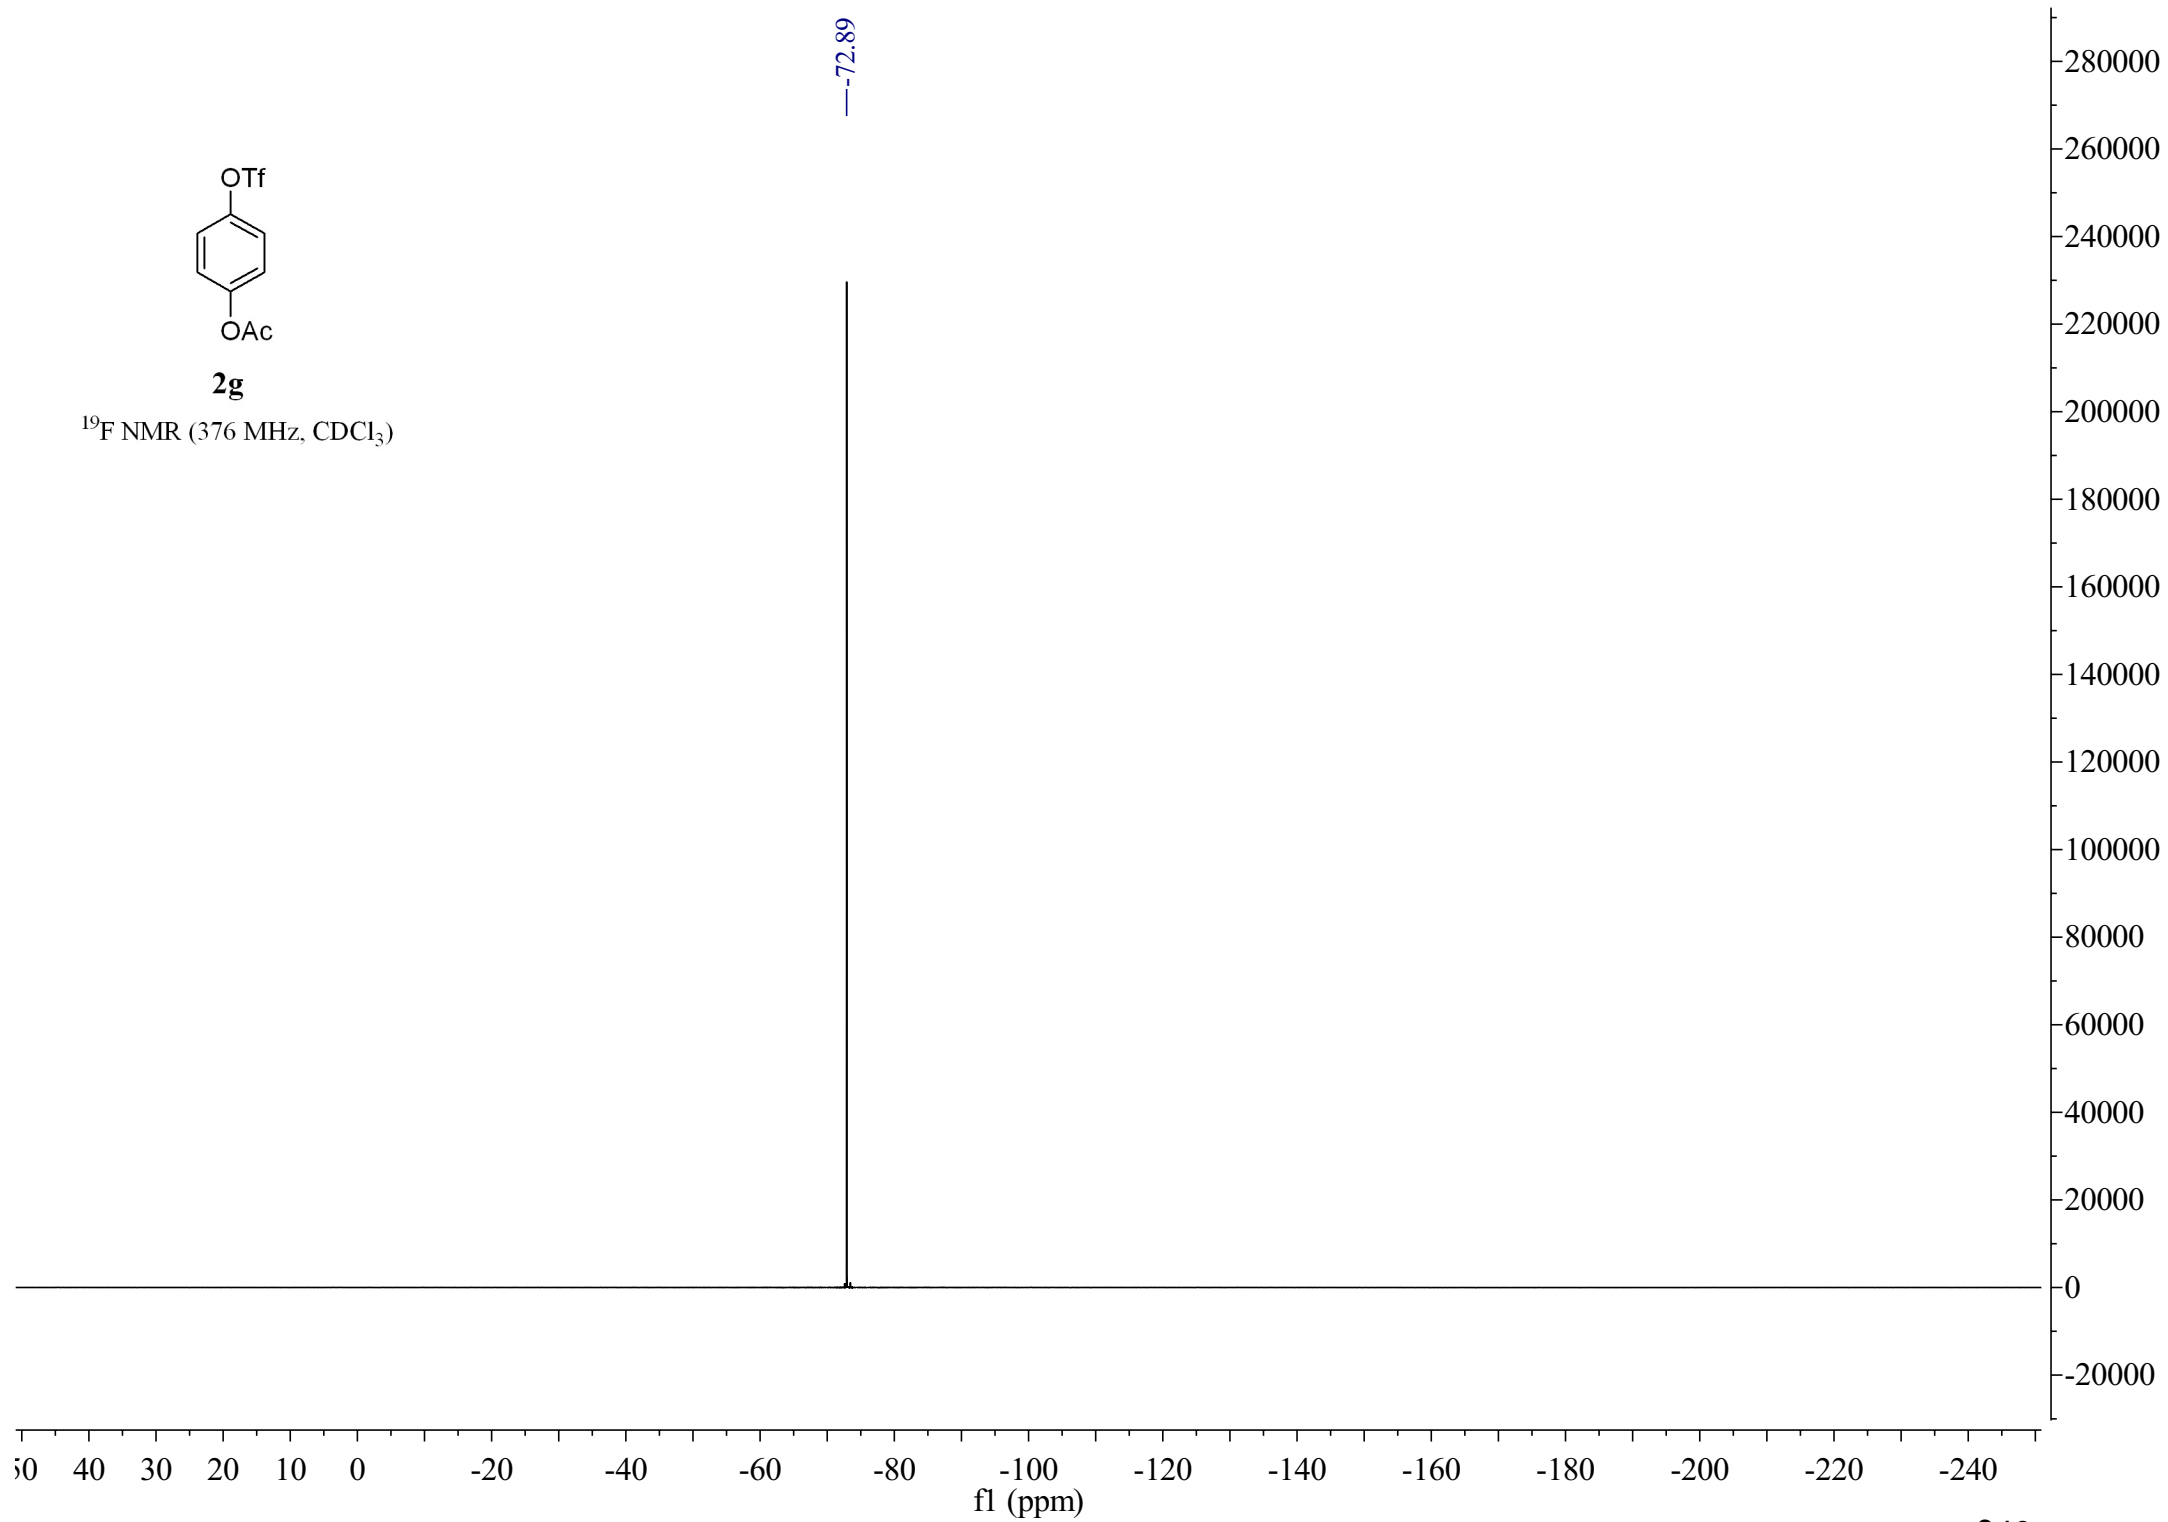

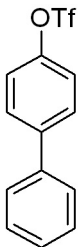

**2h**

$^1\text{H}$  NMR (400 MHz,  $\text{CDCl}_3$ )

7.66  
7.63  
7.63  
7.57  
7.55  
7.48  
7.47  
7.45  
7.41  
7.39  
7.38  
7.36  
7.33

2.00  
2.03  
2.06  
3.04

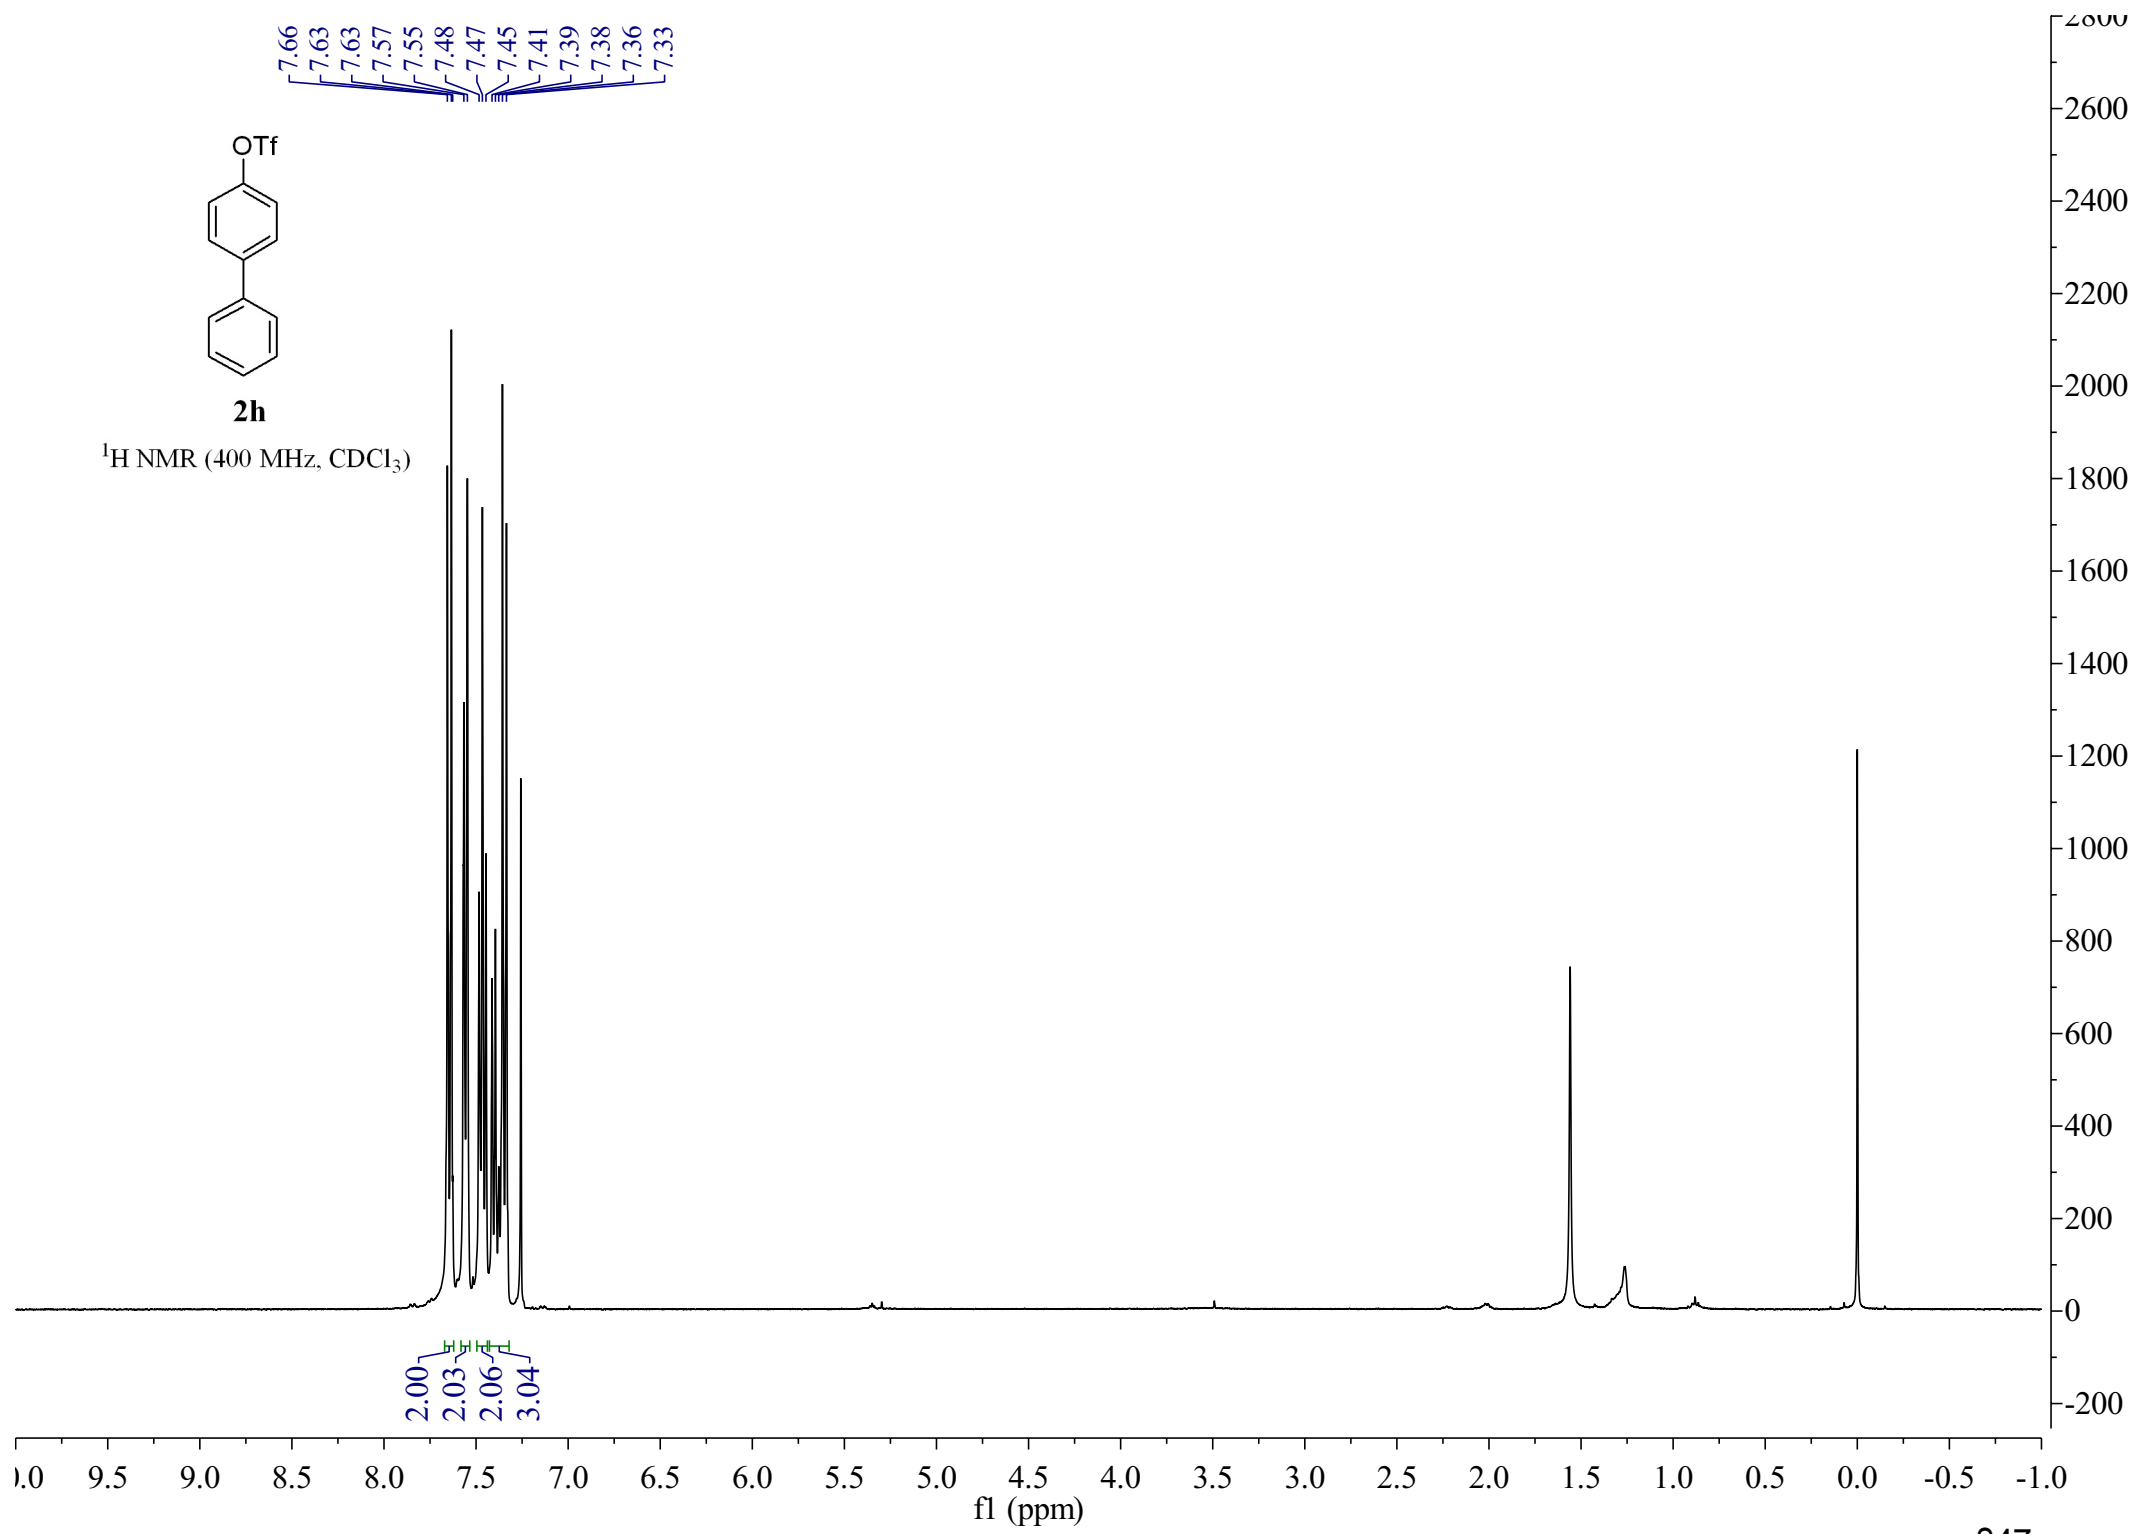

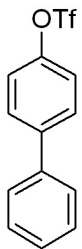

**2h**

$^{19}\text{F}$  NMR (376 MHz,  $\text{CDCl}_3$ )

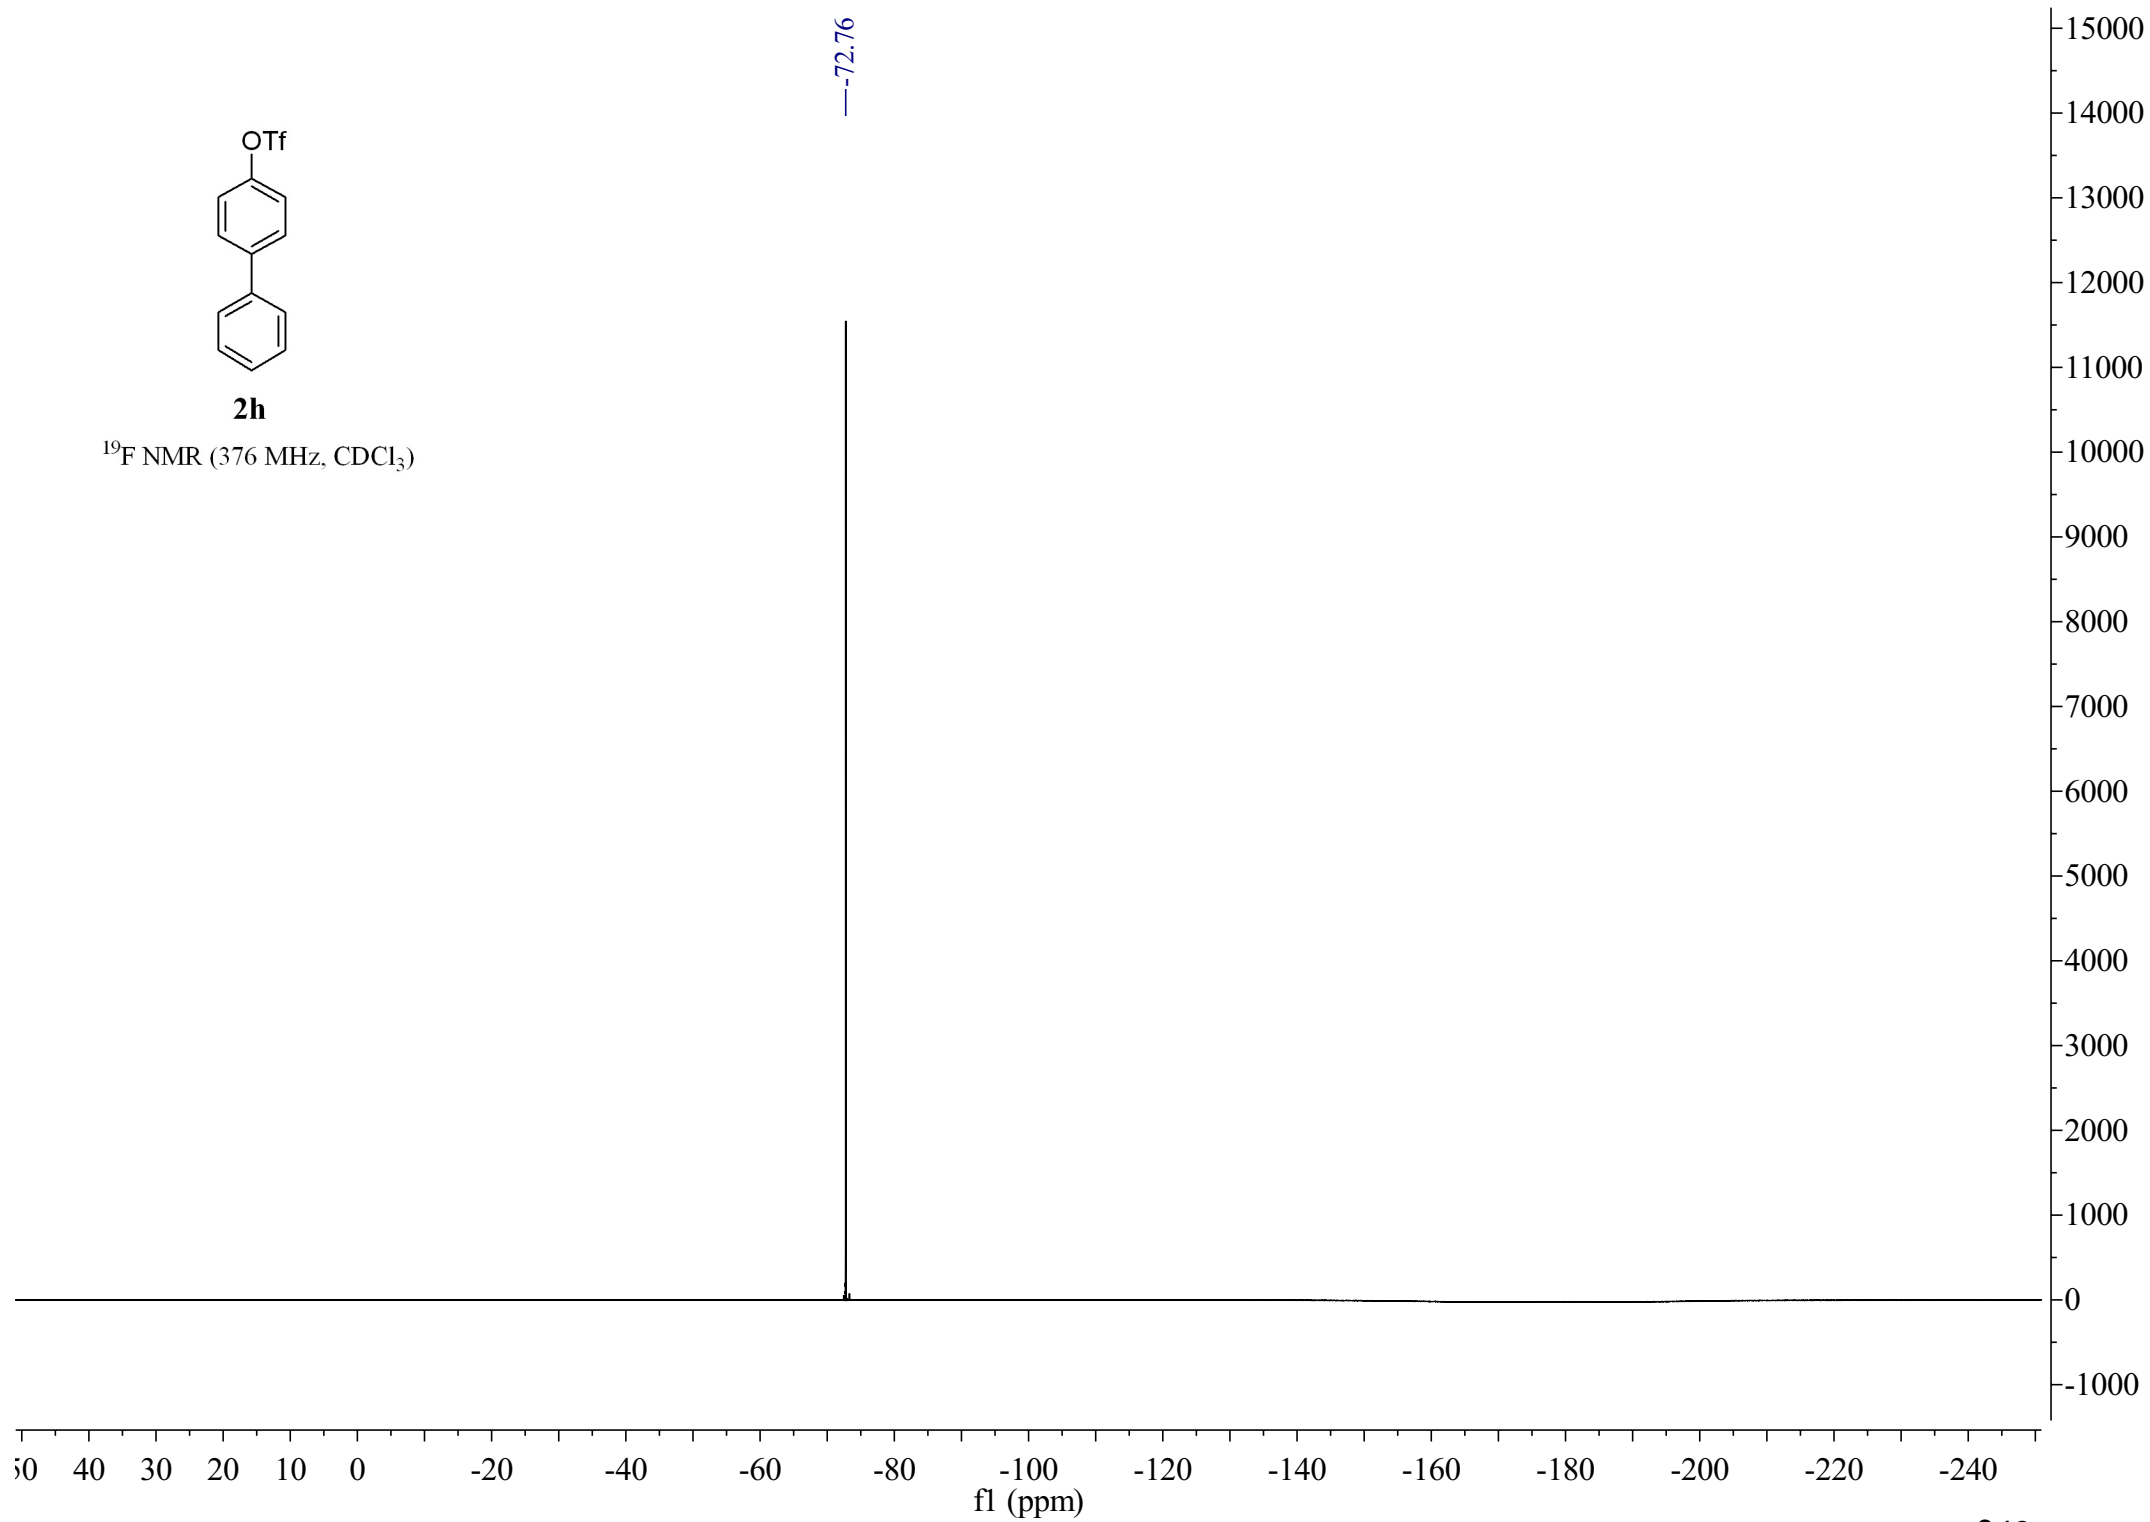



7.81  
7.80  
7.79  
7.78  
7.77  
7.77  
7.75  
7.75  
7.75  
7.73  
7.73  
7.57  
7.57  
7.55  
7.55  
7.53  
7.53  
7.52  
7.50

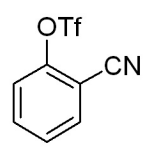

**2i**

<sup>1</sup>H NMR (400 MHz, CDCl<sub>3</sub>)

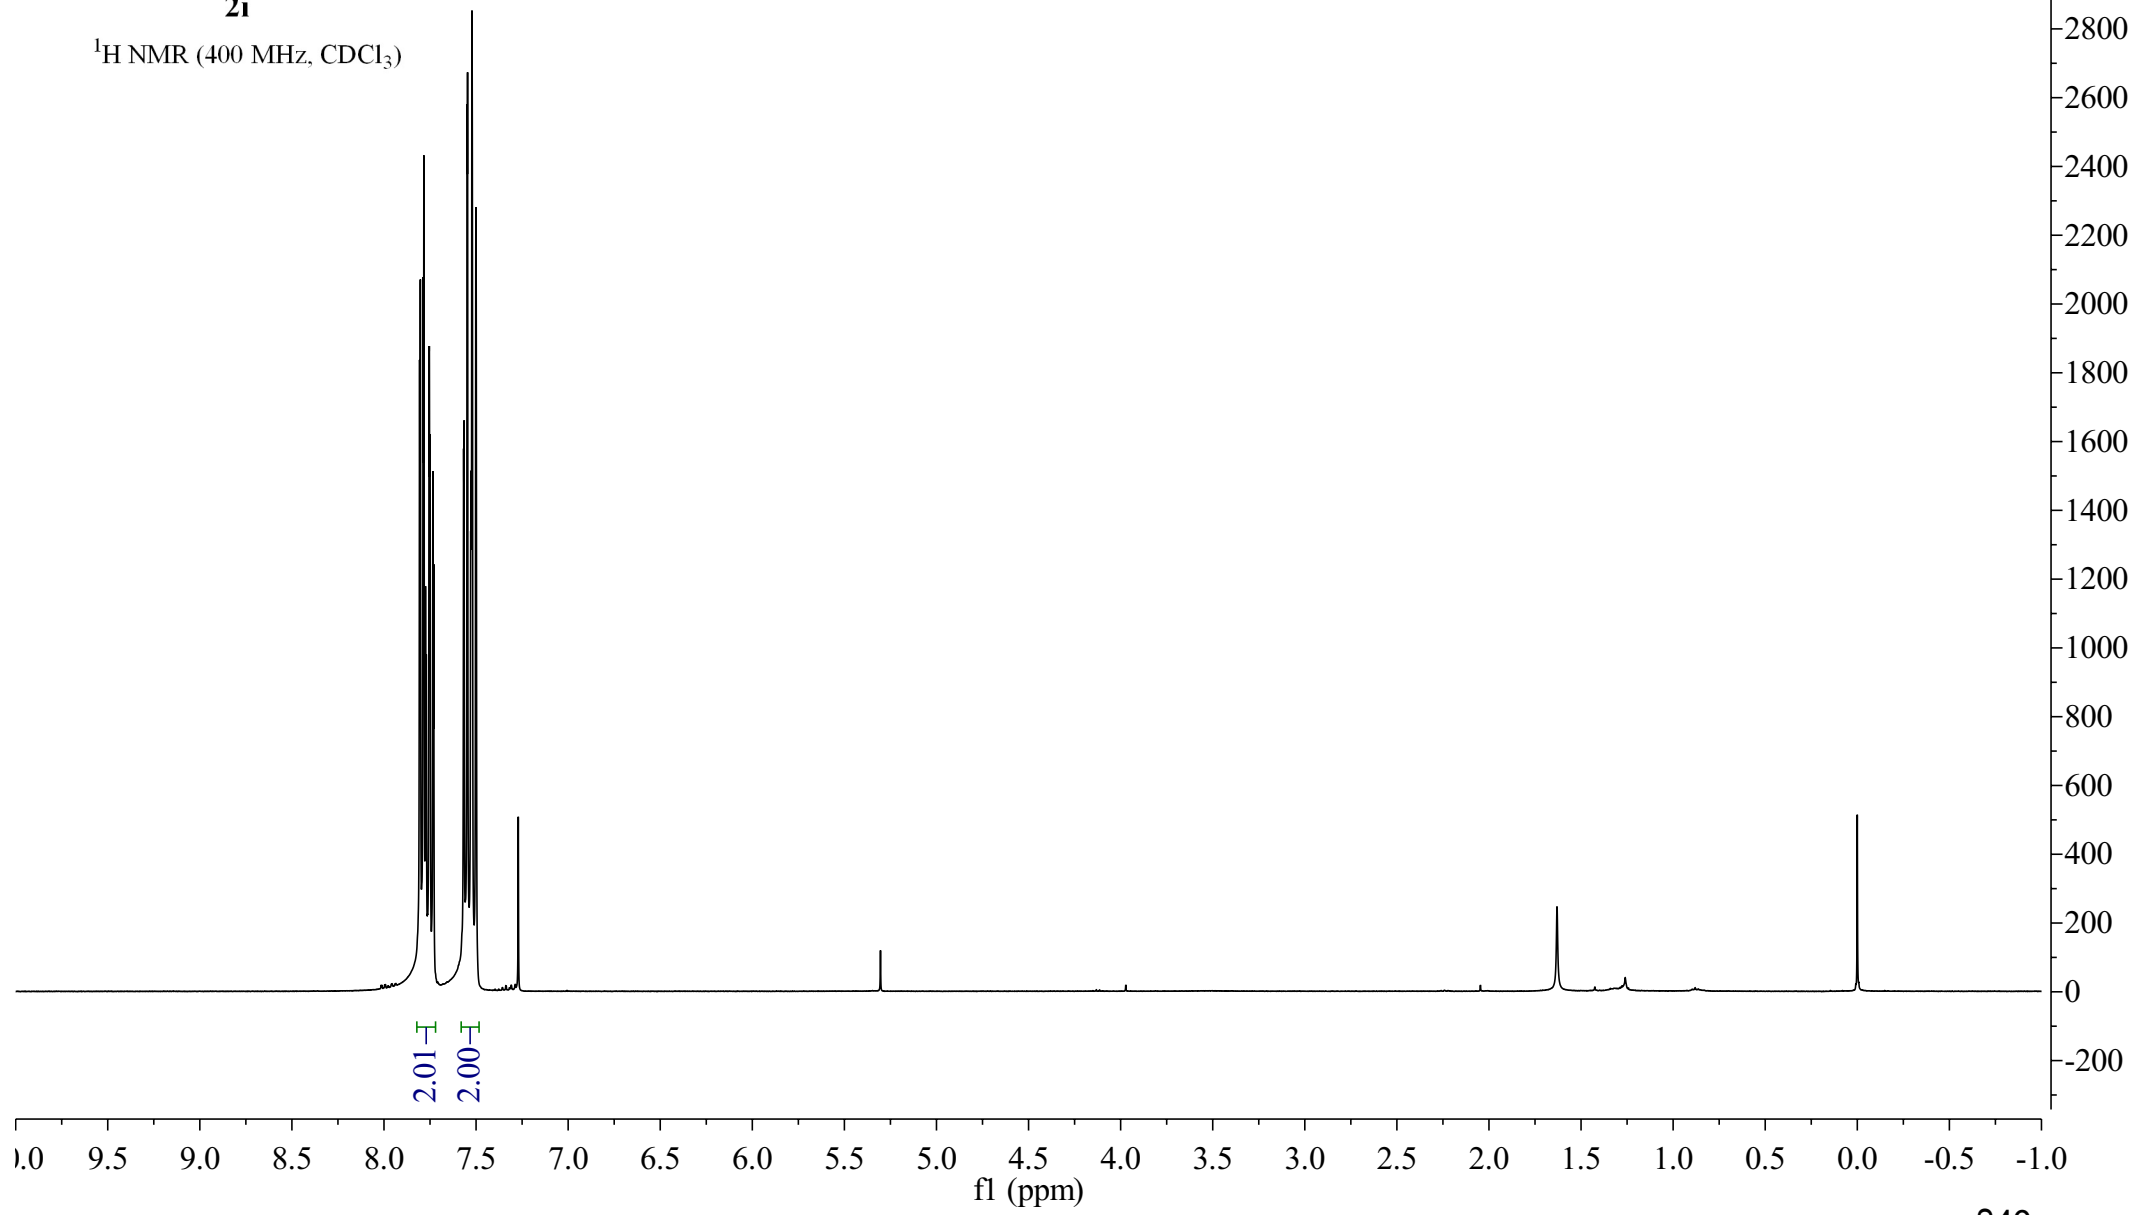

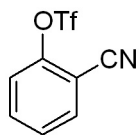

**2i**

<sup>19</sup>F NMR (376 MHz, CDCl<sub>3</sub>)

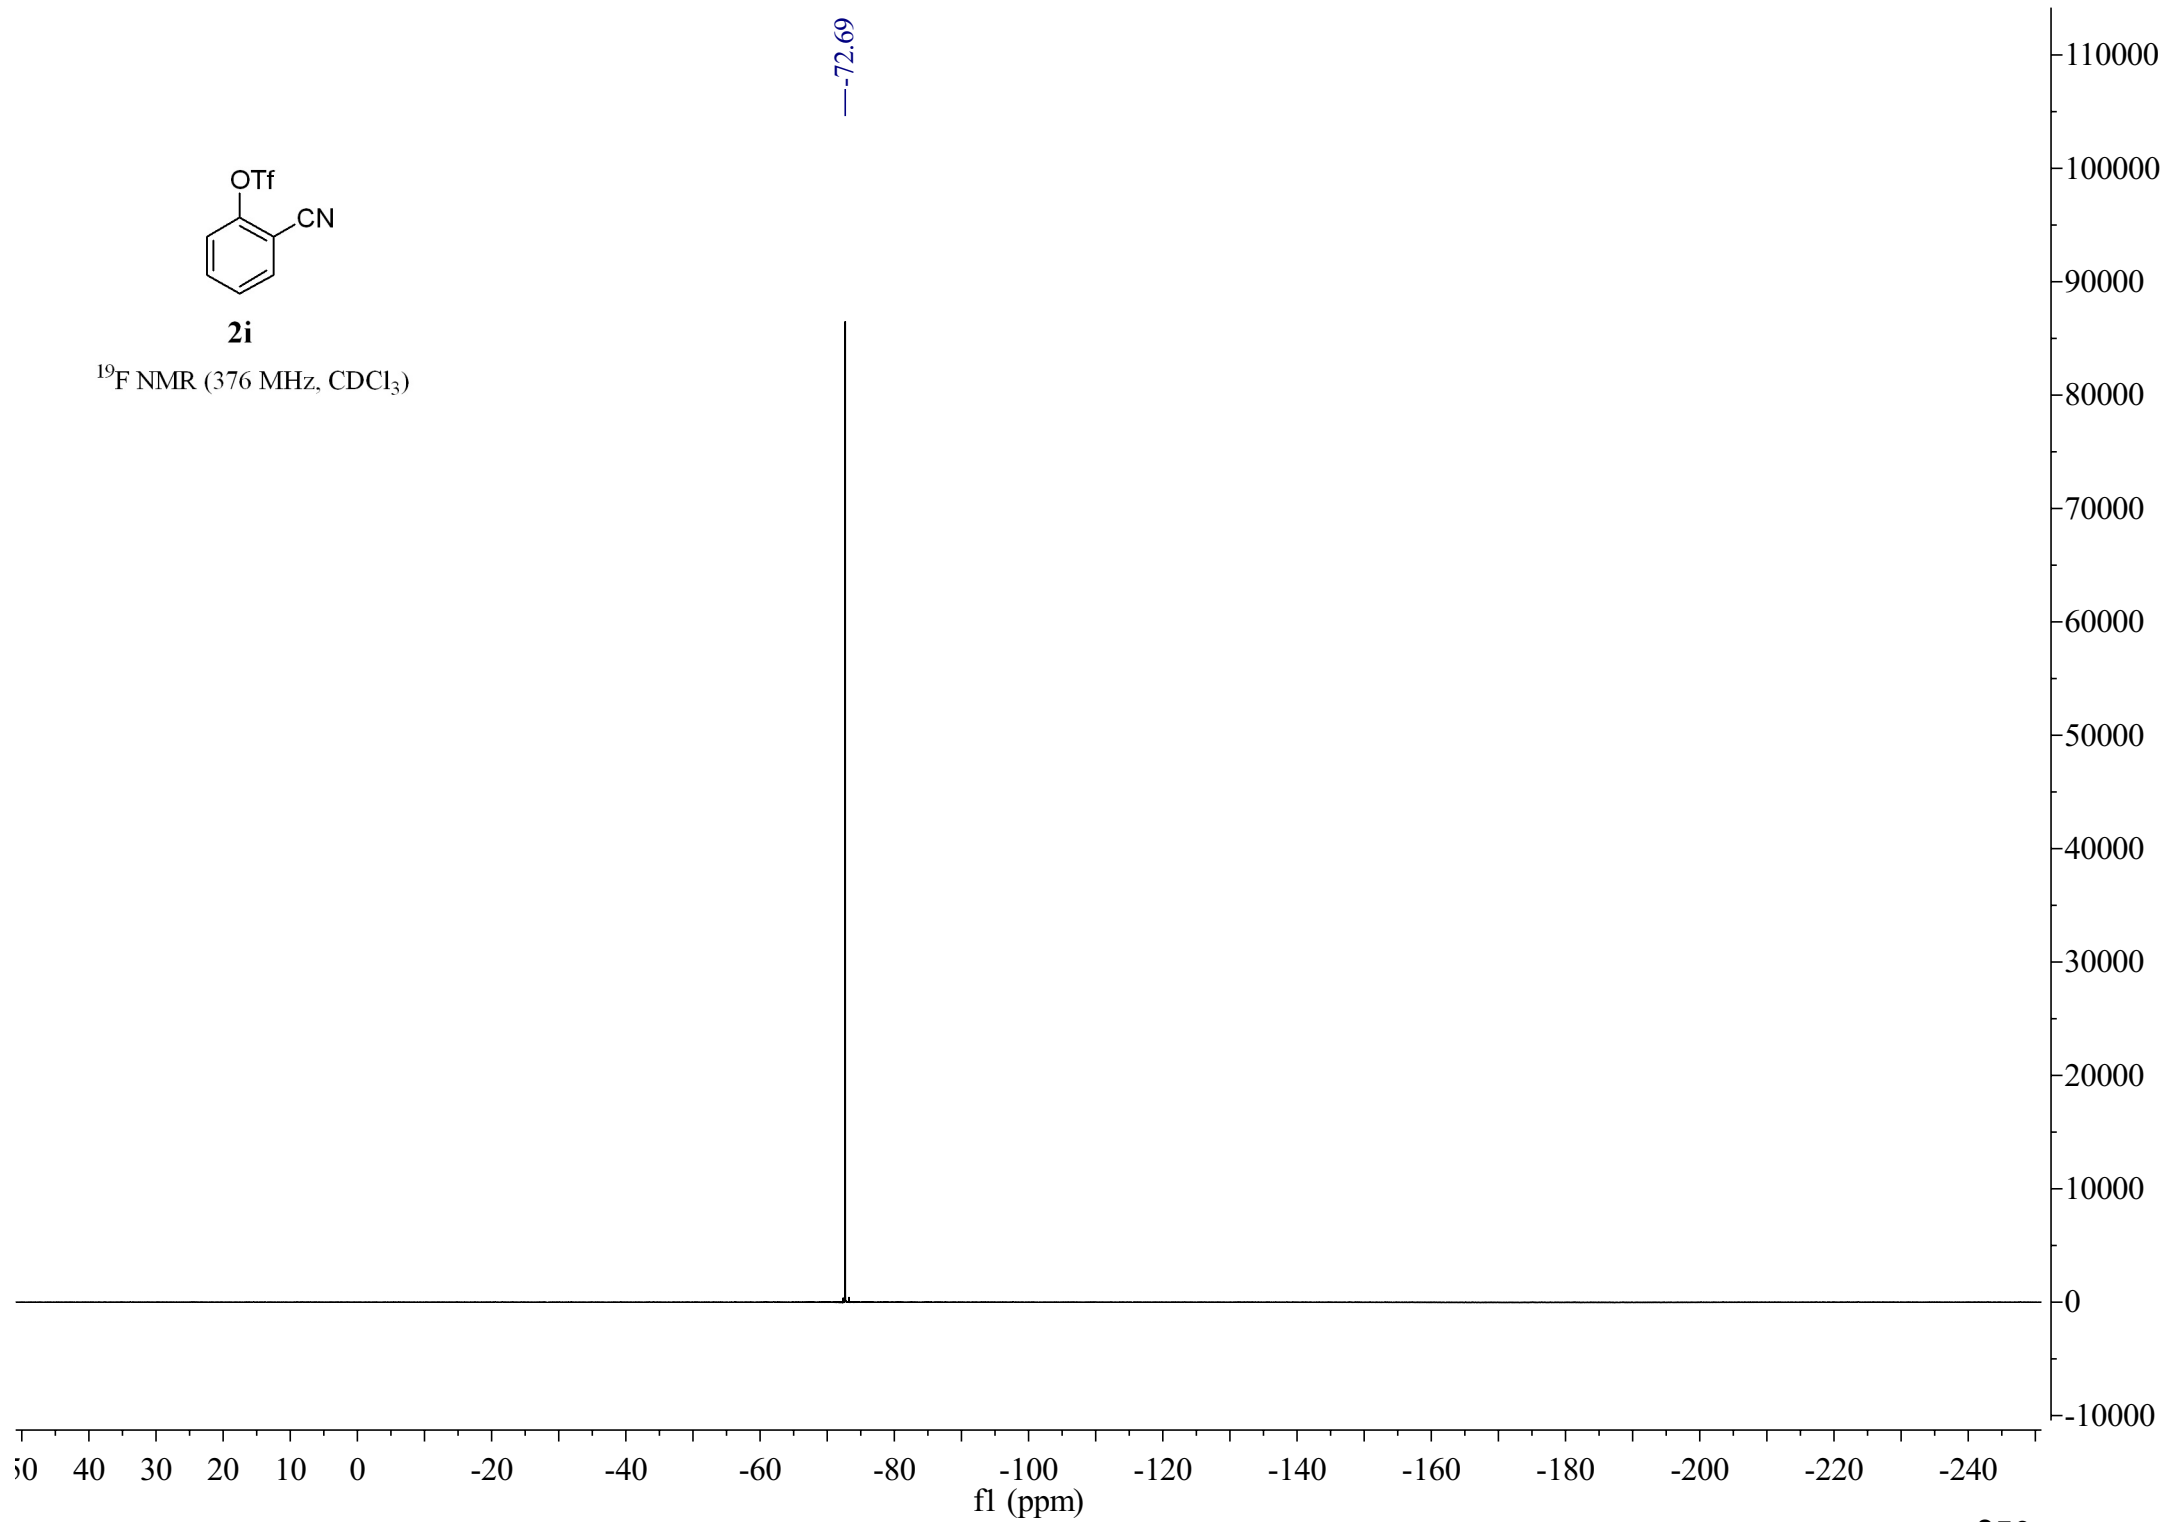

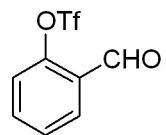

**2j**

<sup>19</sup>F NMR (376 MHz, CDCl<sub>3</sub>)

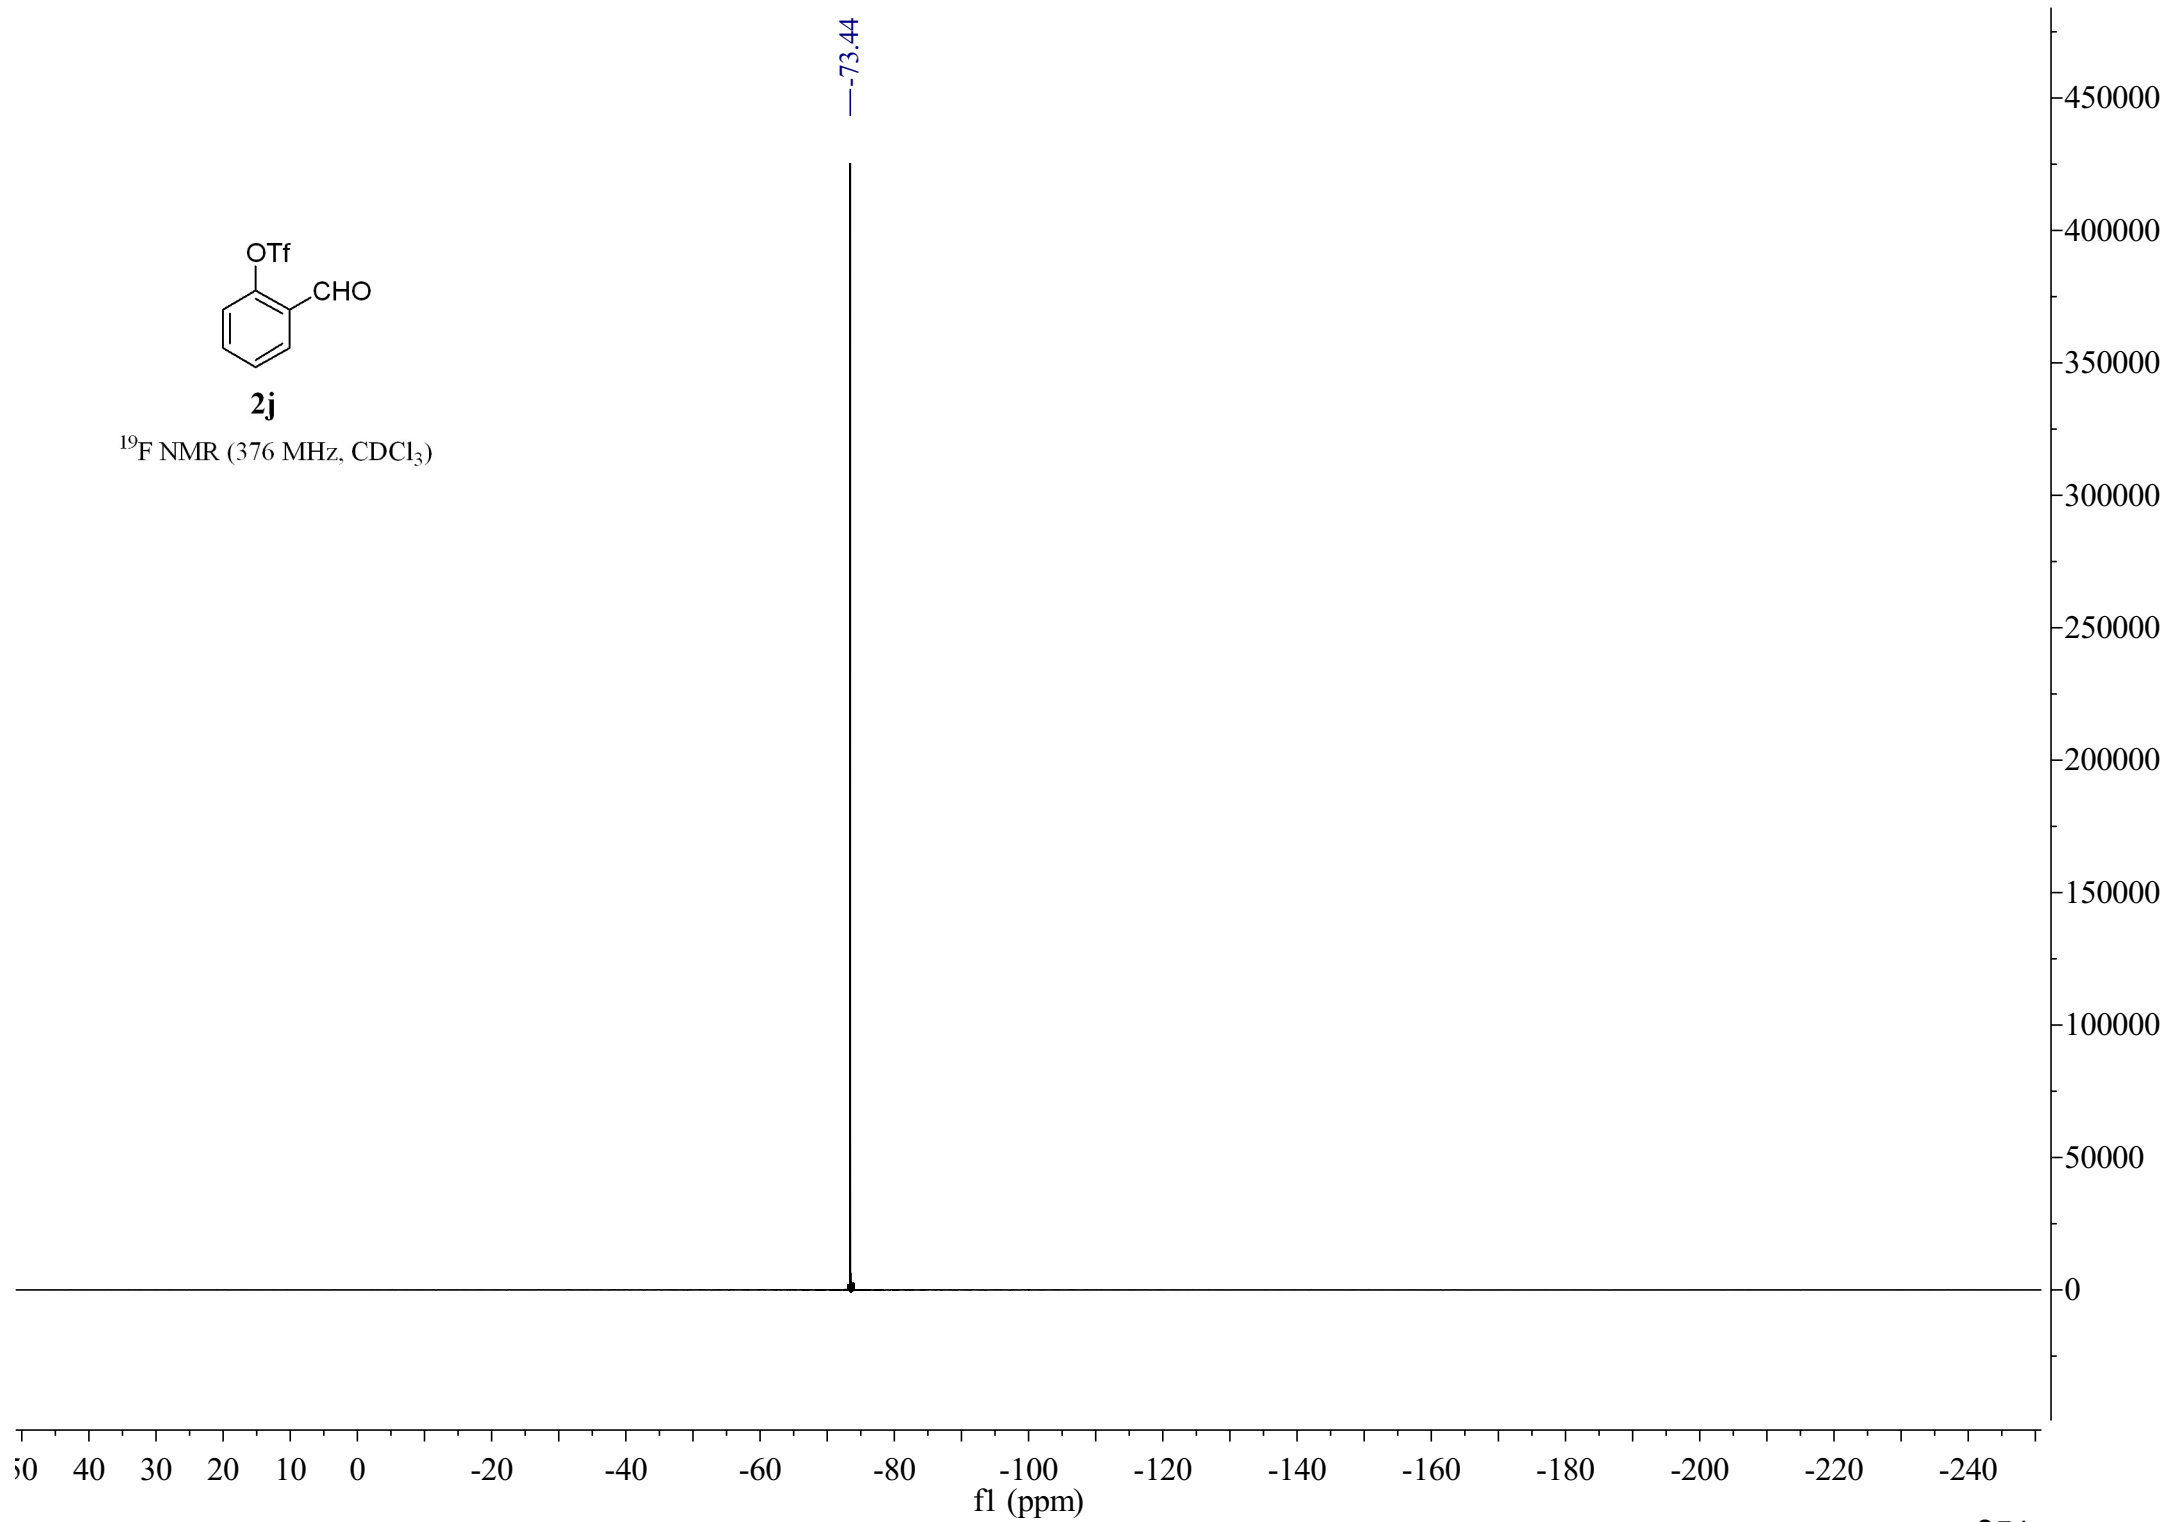

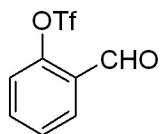

**2j**

$^1\text{H}$  NMR (400 MHz,  $\text{CDCl}_3$ )

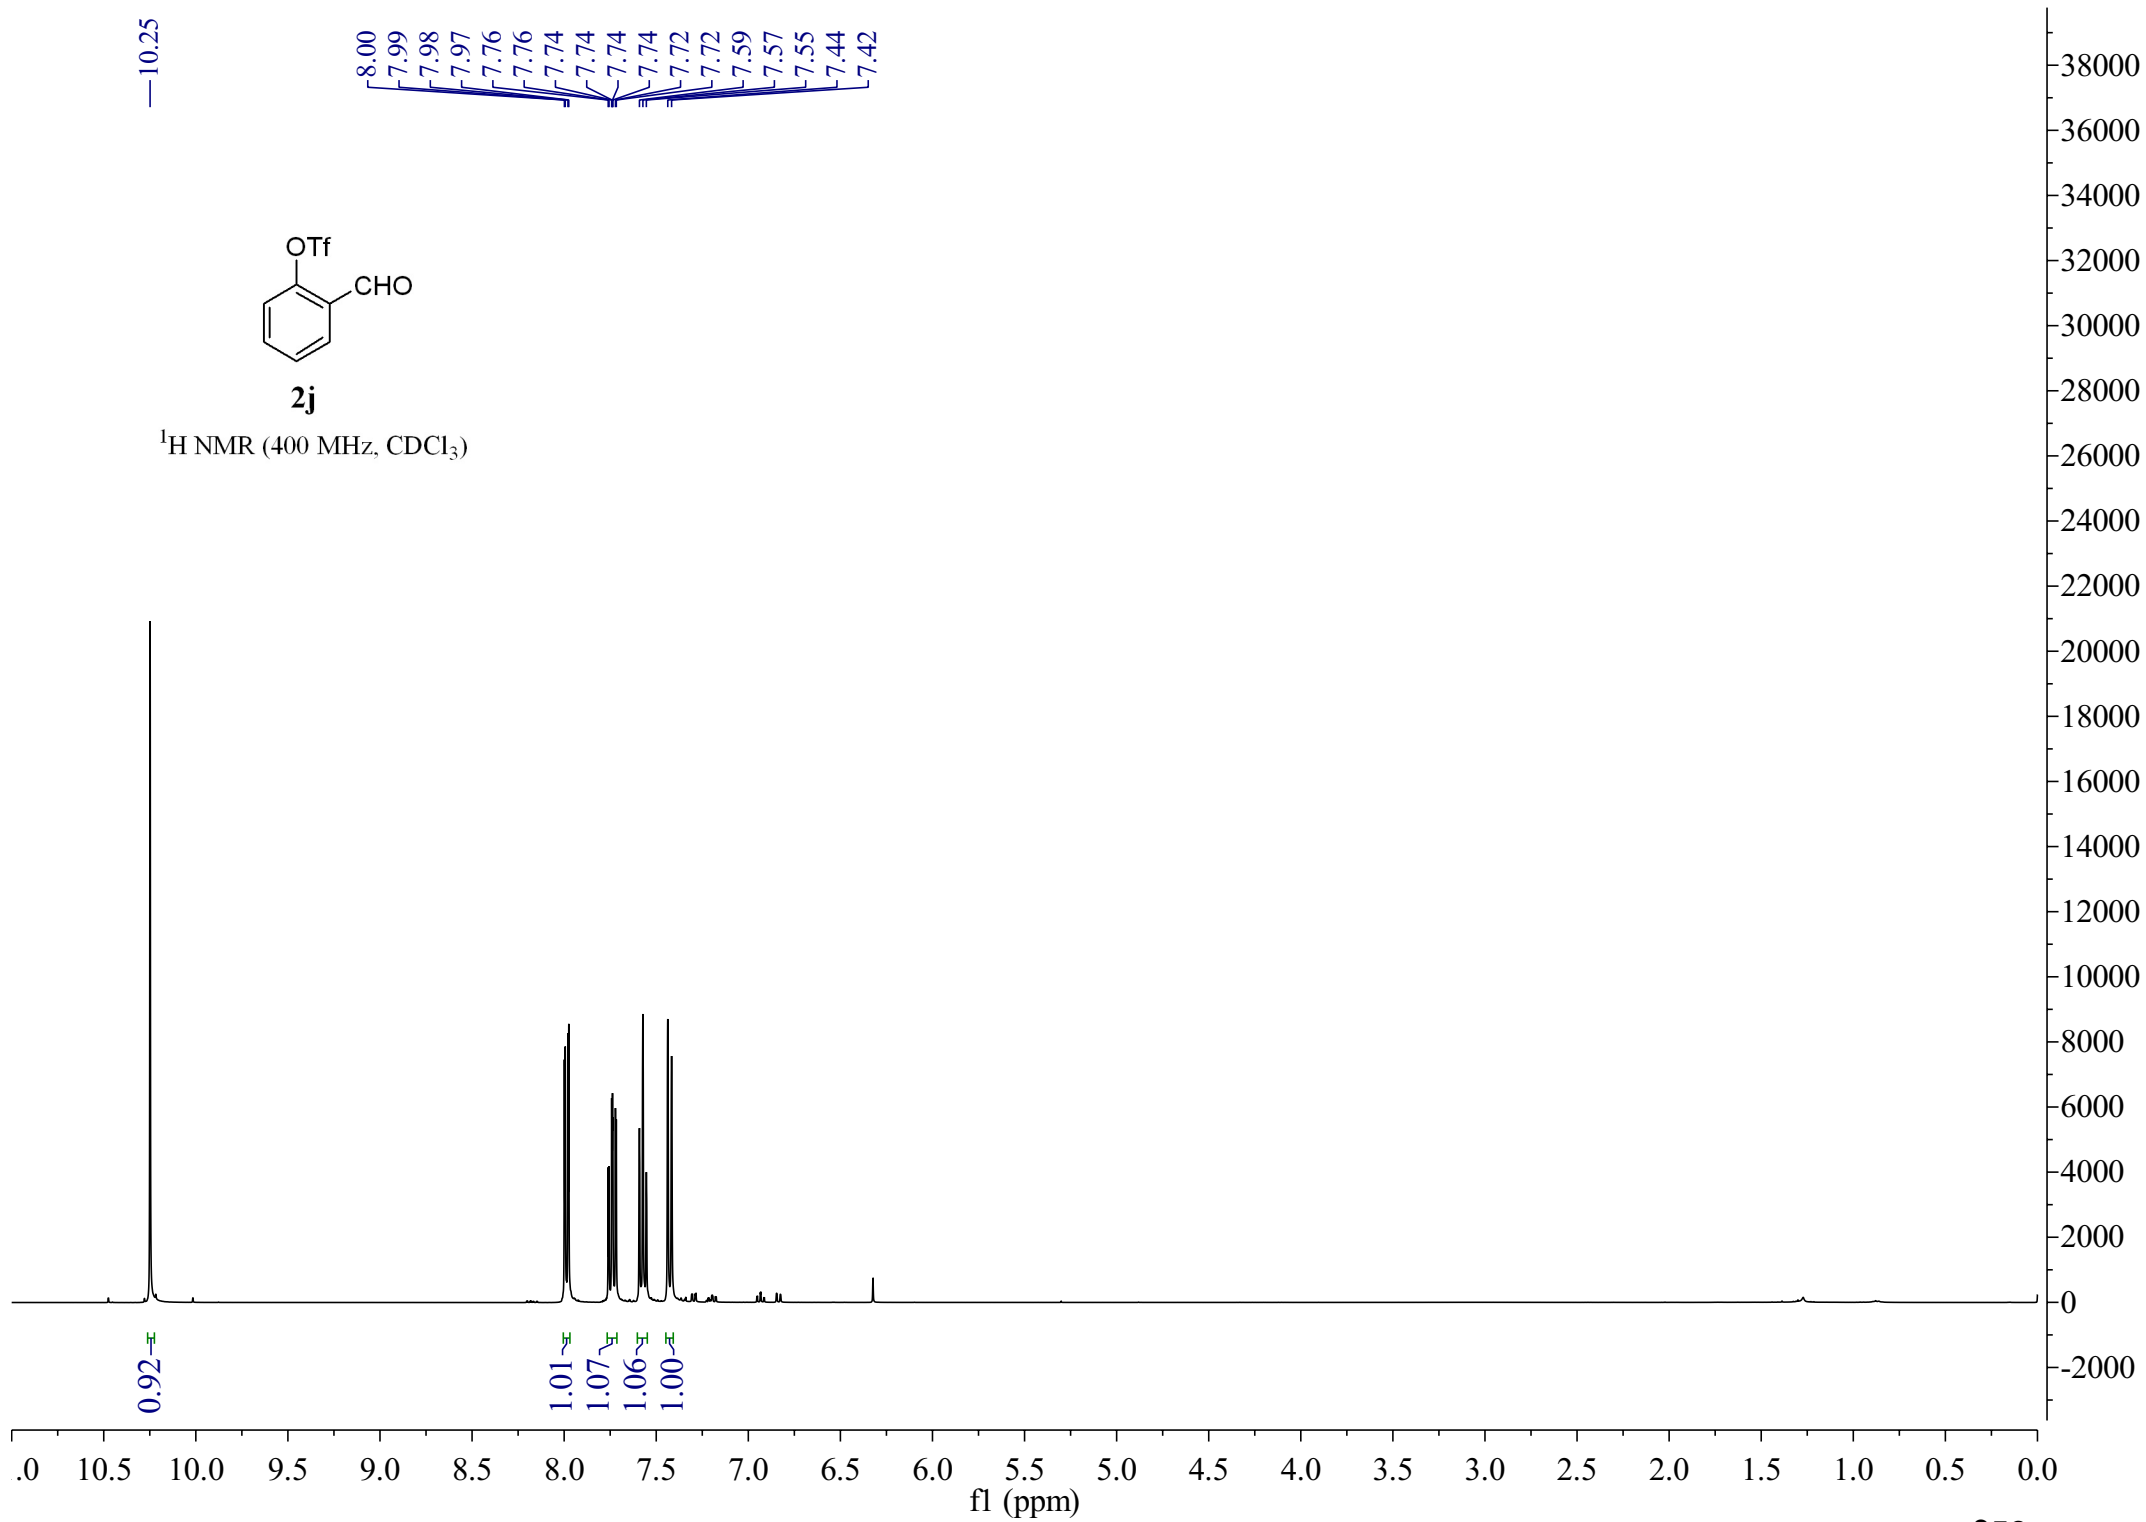

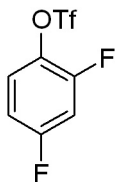

**2k**

$^1\text{H NMR}$  (400 MHz,  $\text{CDCl}_3$ )

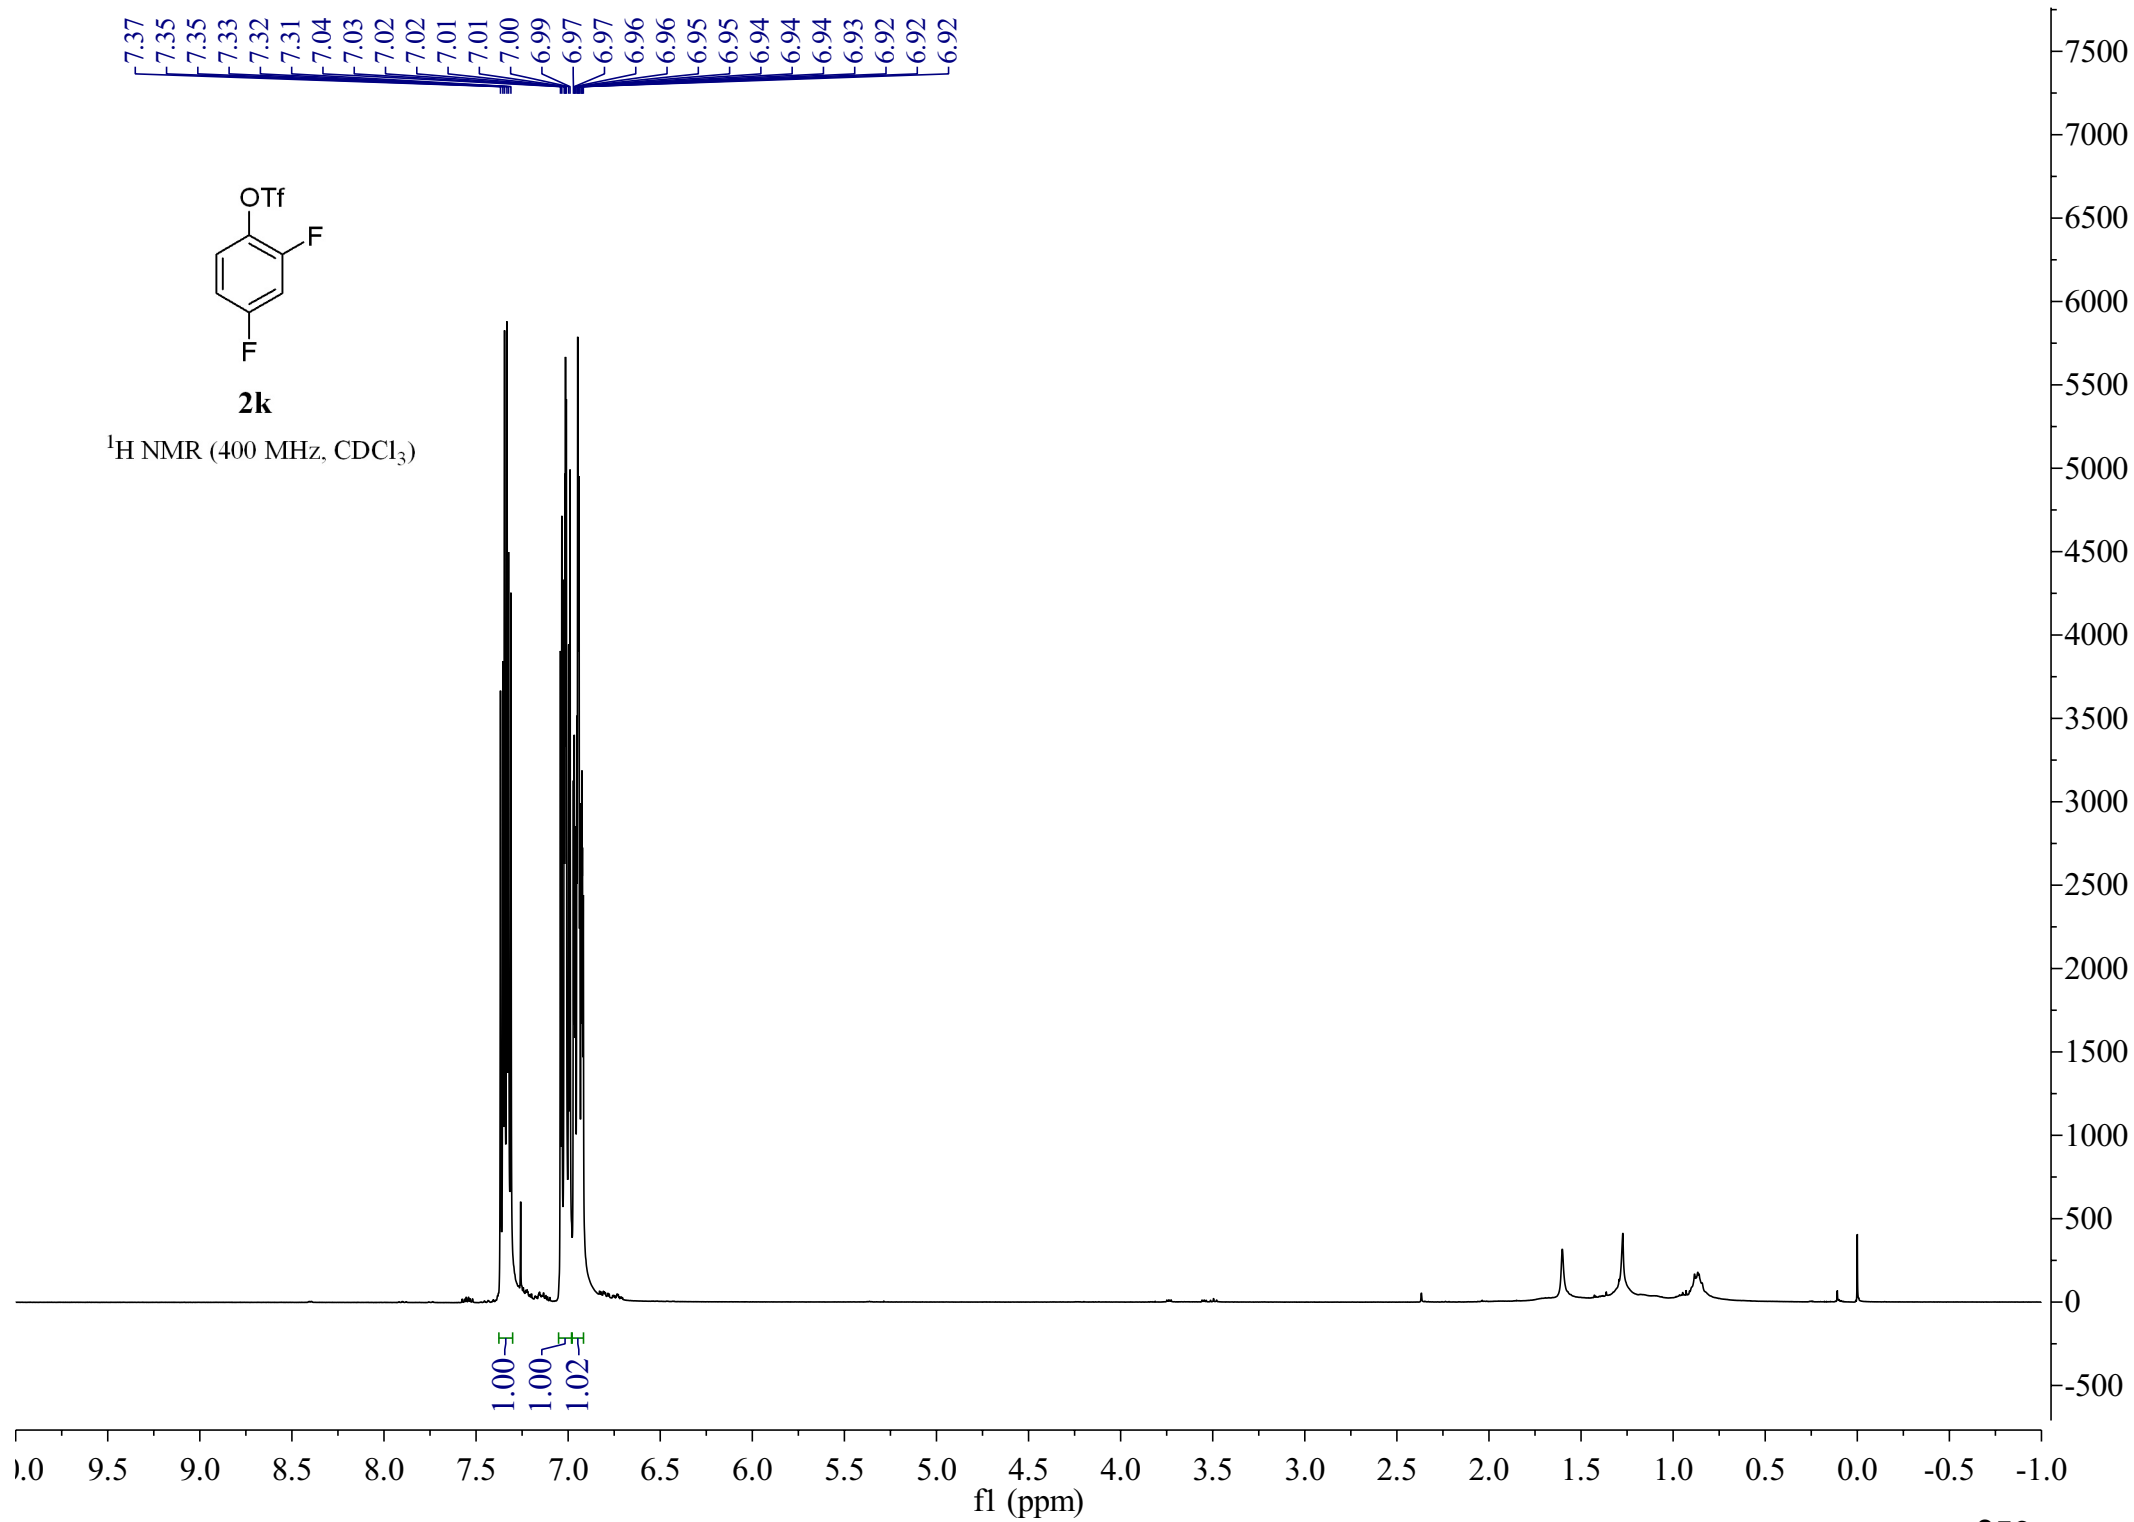

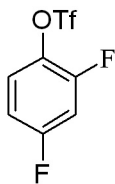

**2k**

<sup>19</sup>F NMR (376 MHz, CDCl<sub>3</sub>)

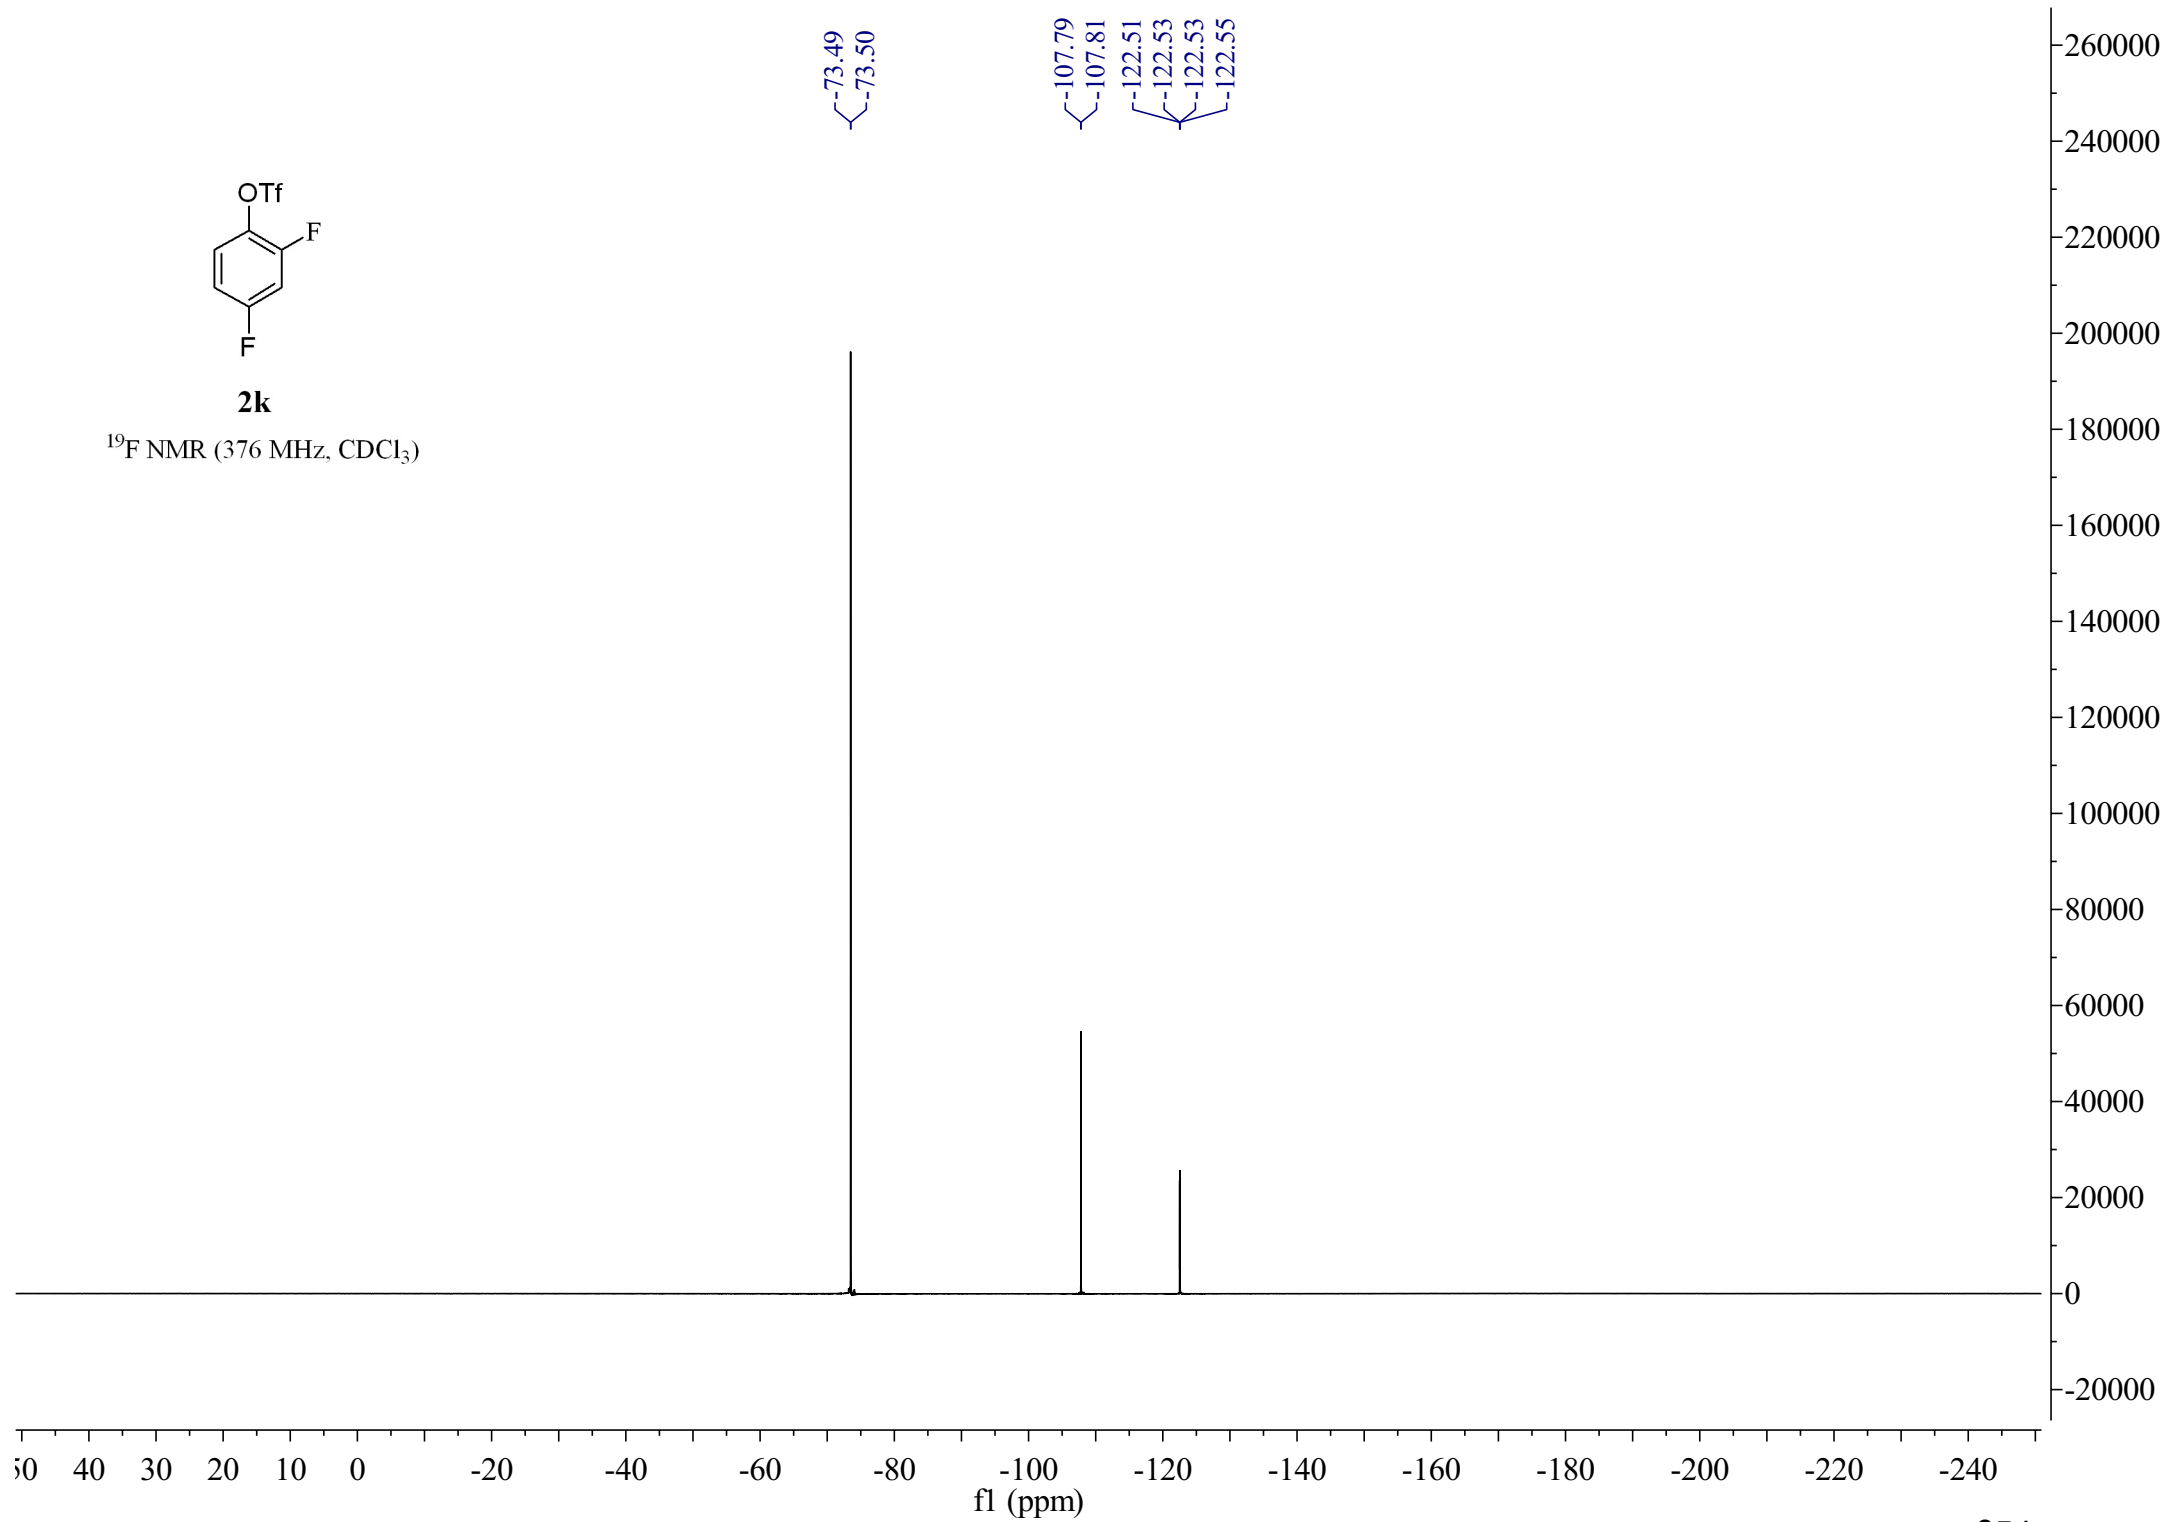

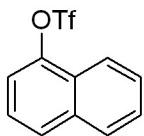

**21**

<sup>1</sup>H NMR (400 MHz, CDCl<sub>3</sub>)

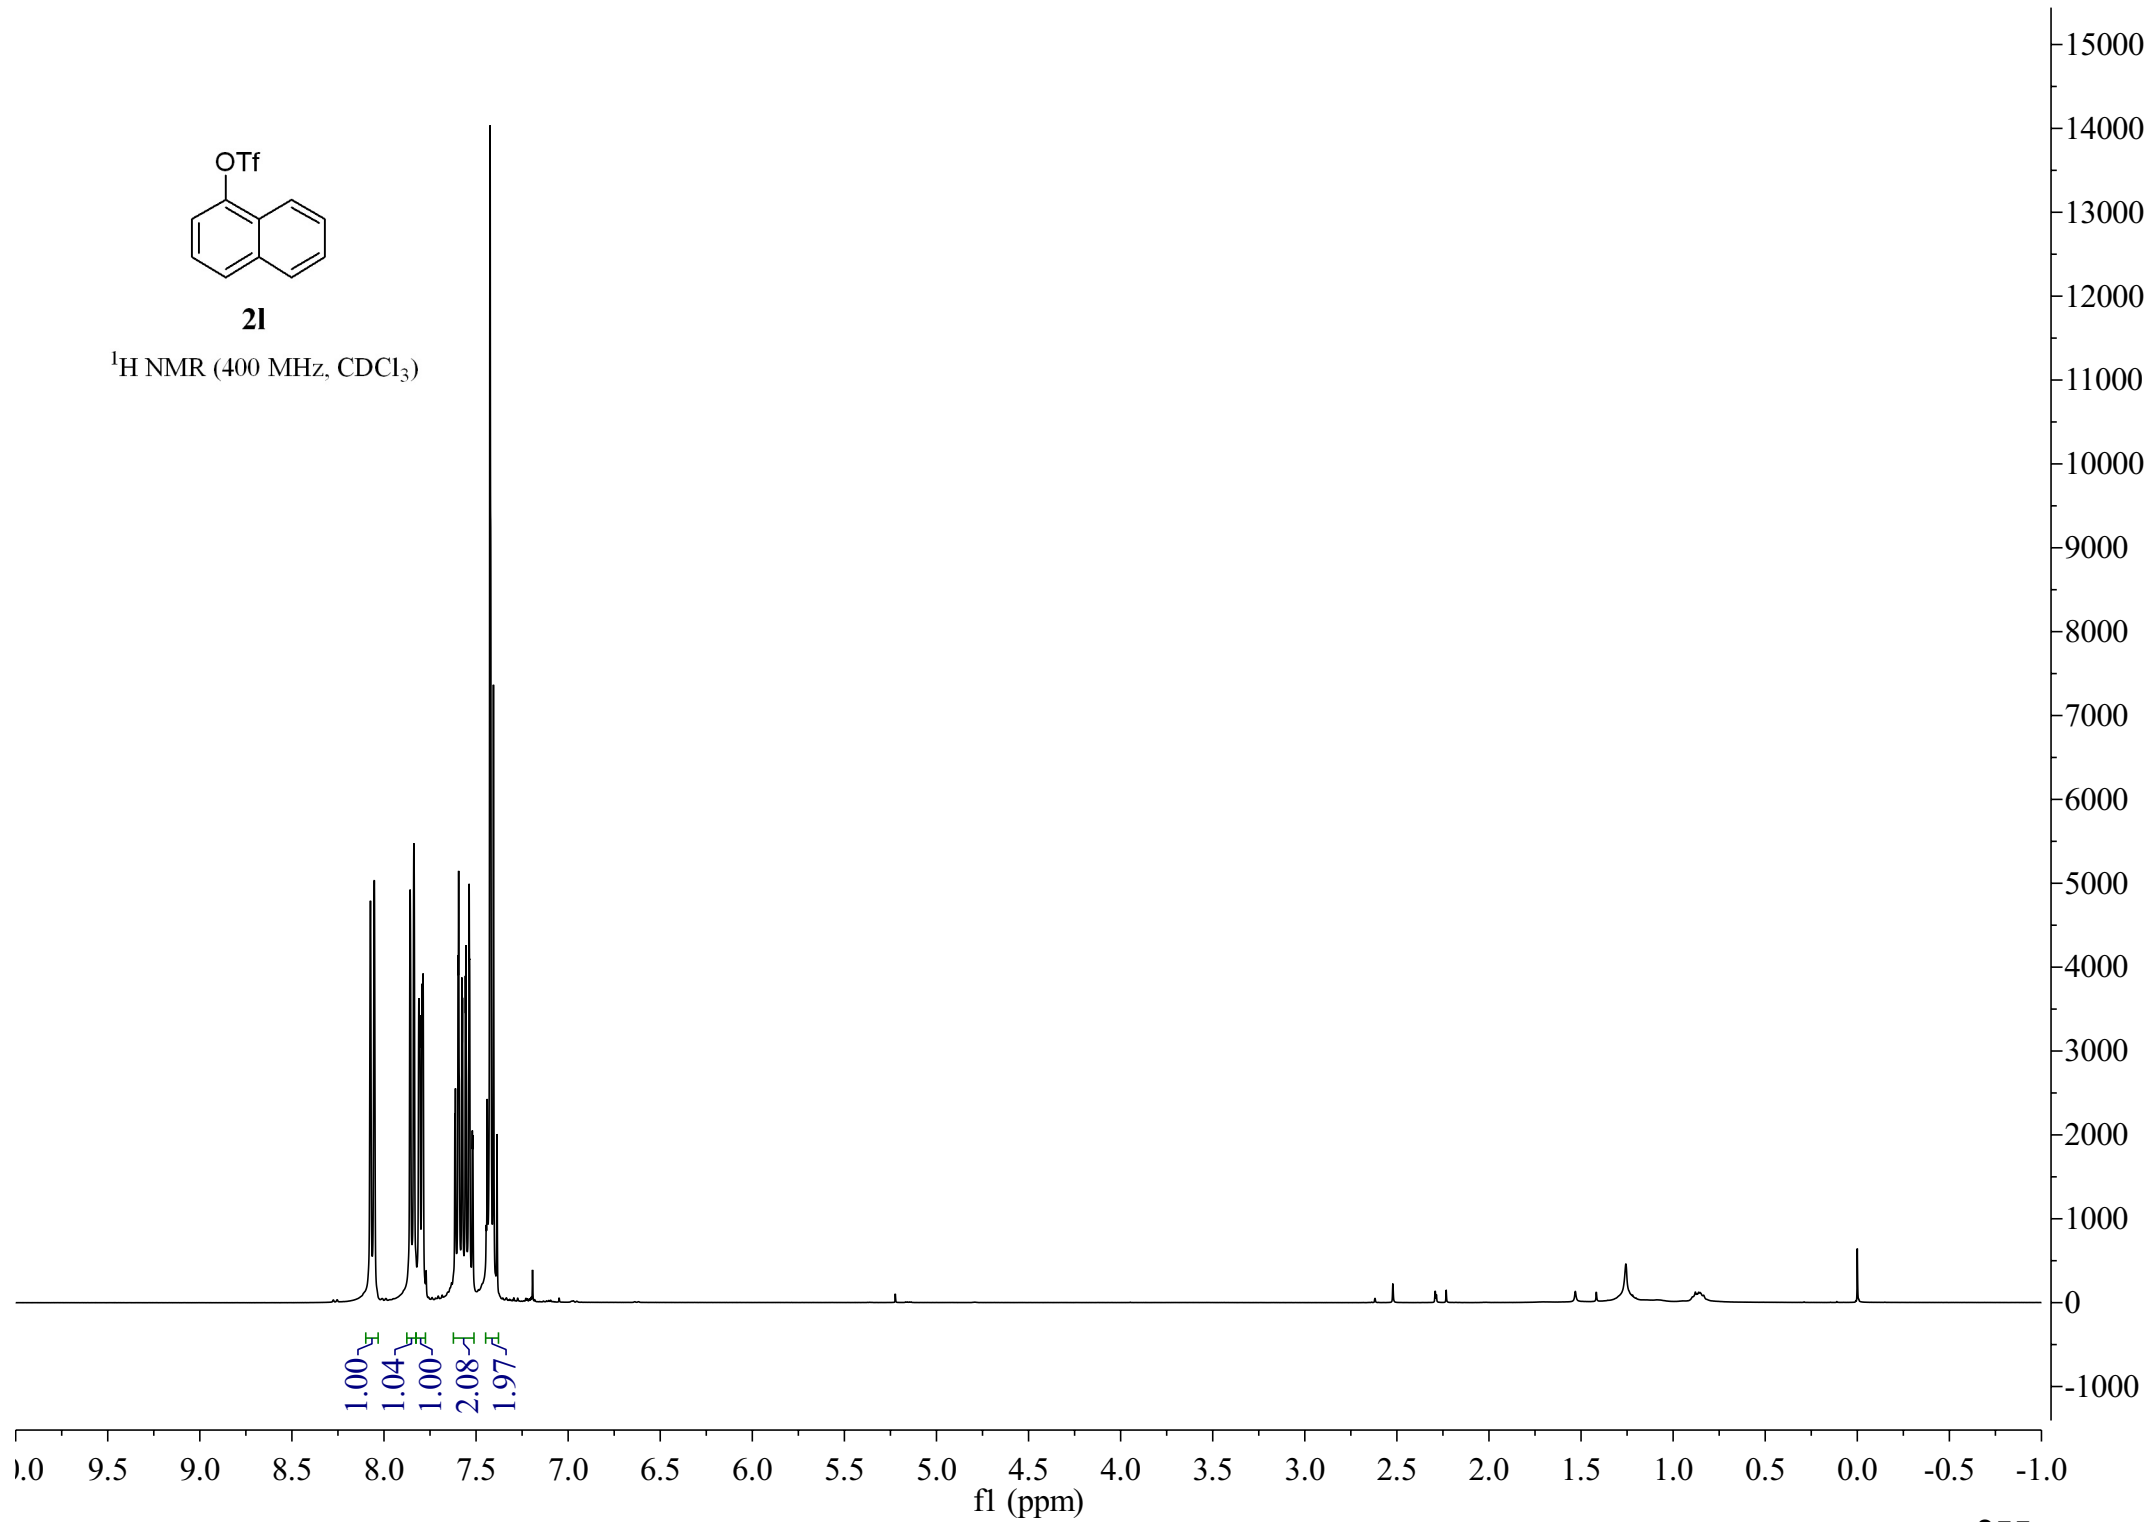

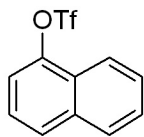

**2l**

$^{19}\text{F}$  NMR (376 MHz,  $\text{CDCl}_3$ )

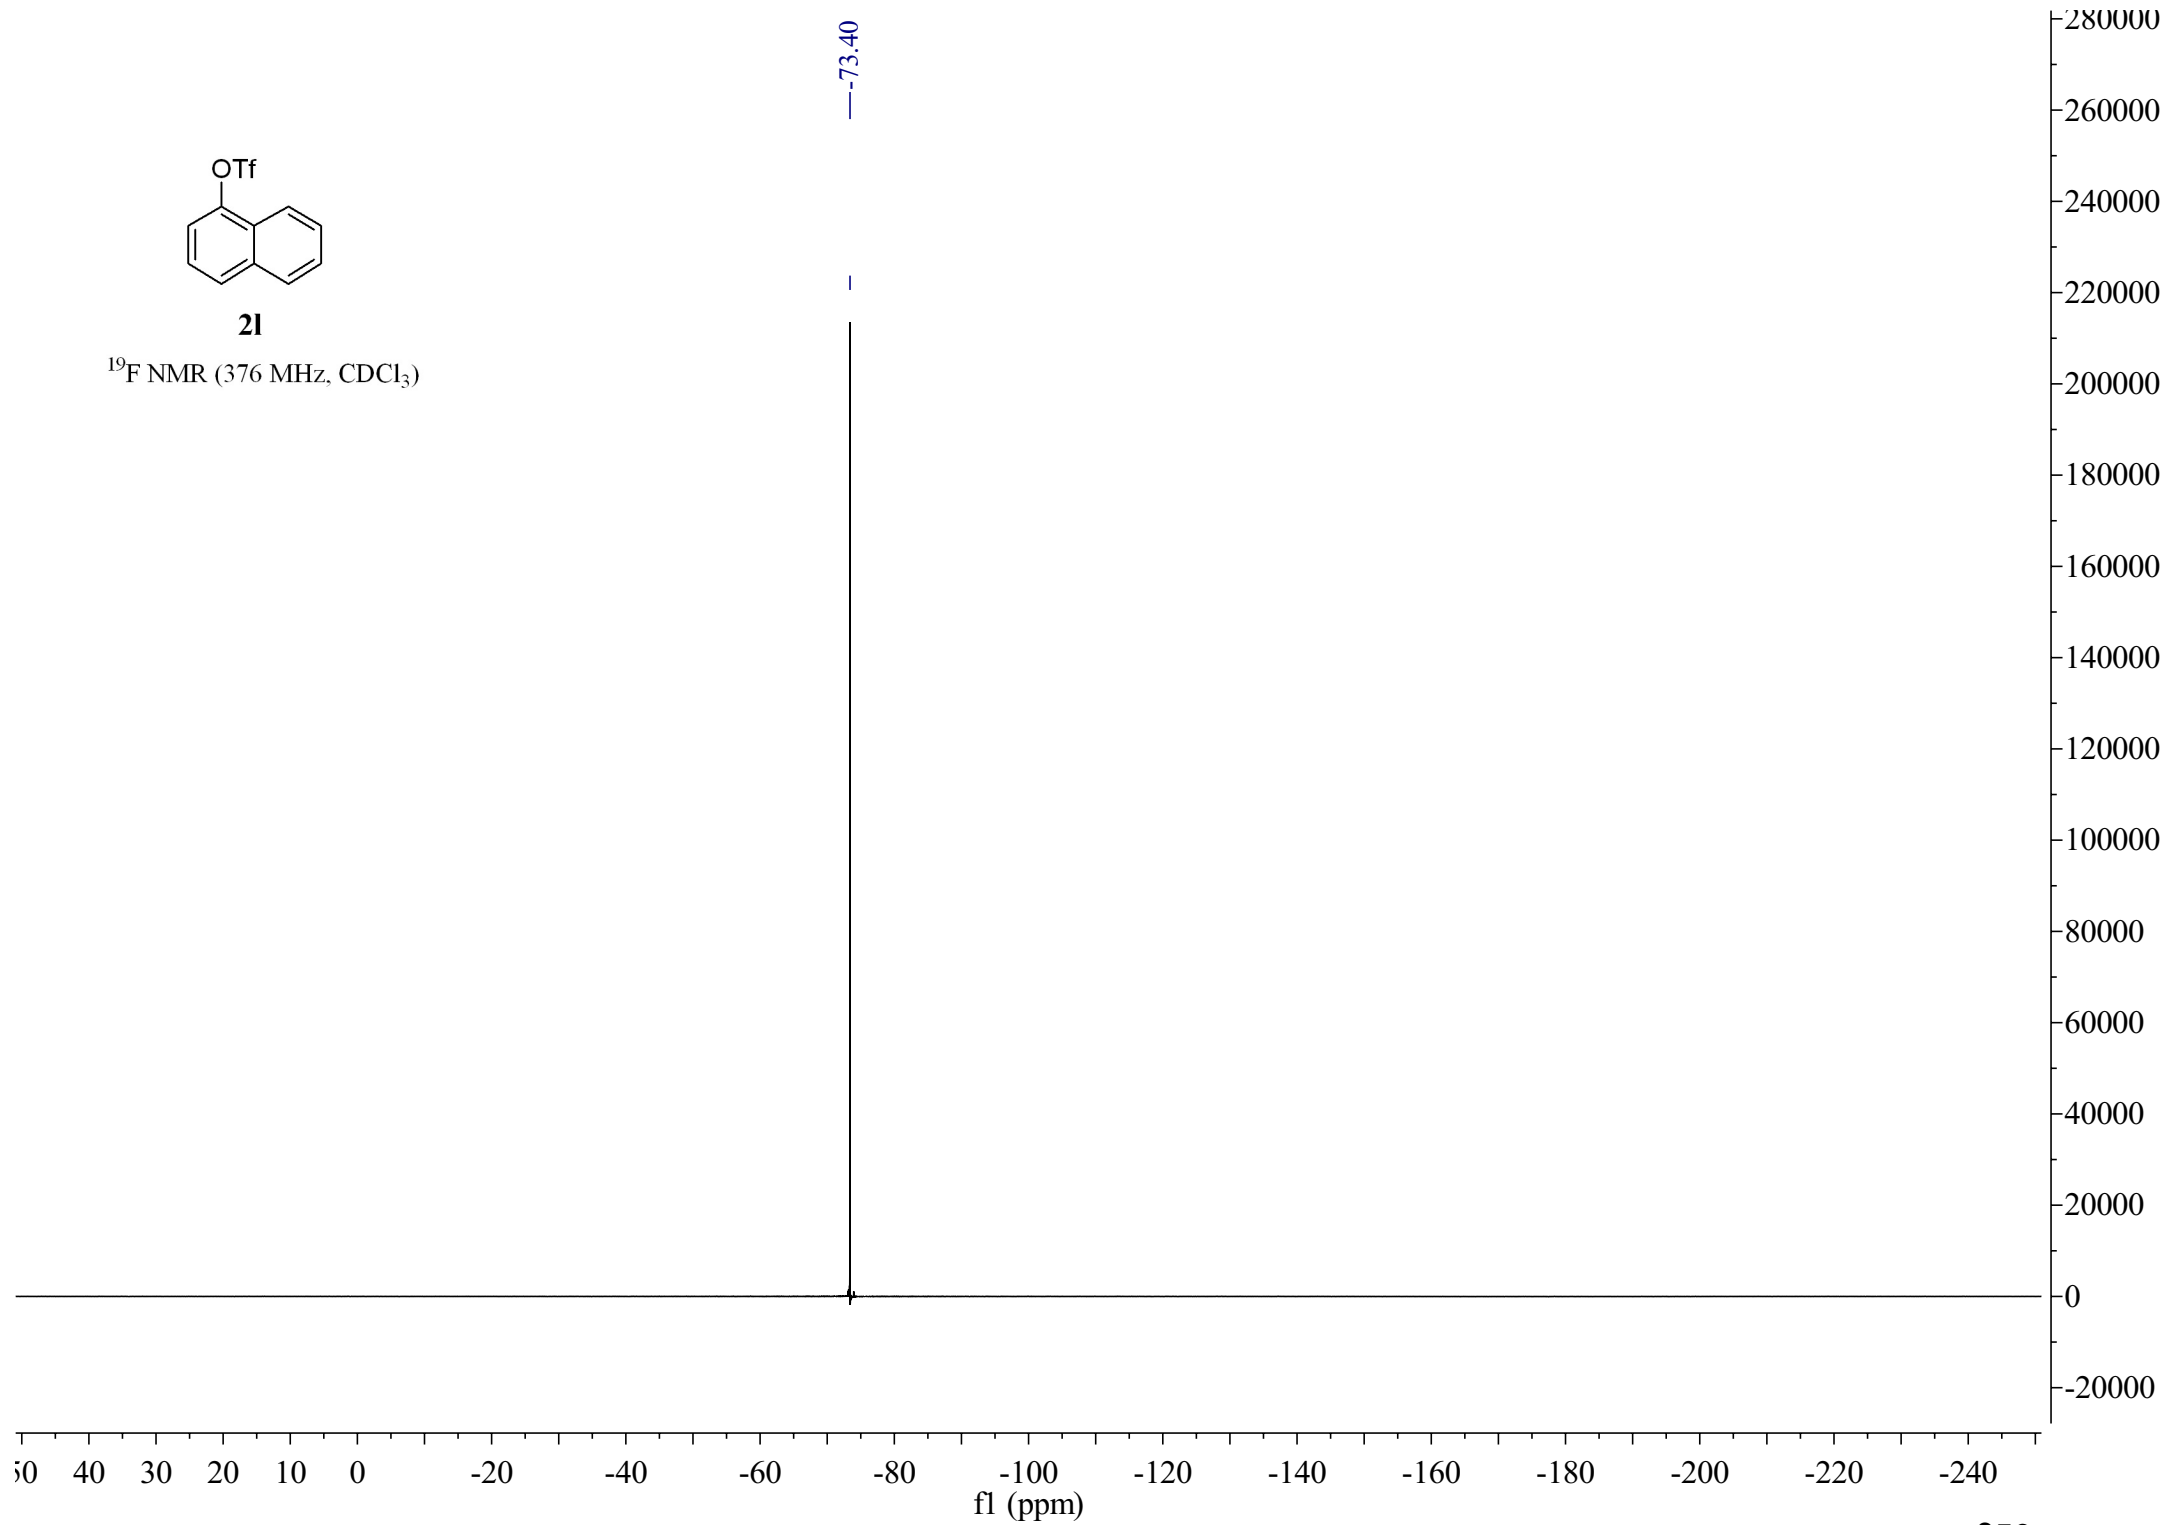



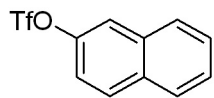

**2m**

$^1\text{H}$  NMR (400 MHz,  $\text{CDCl}_3$ )

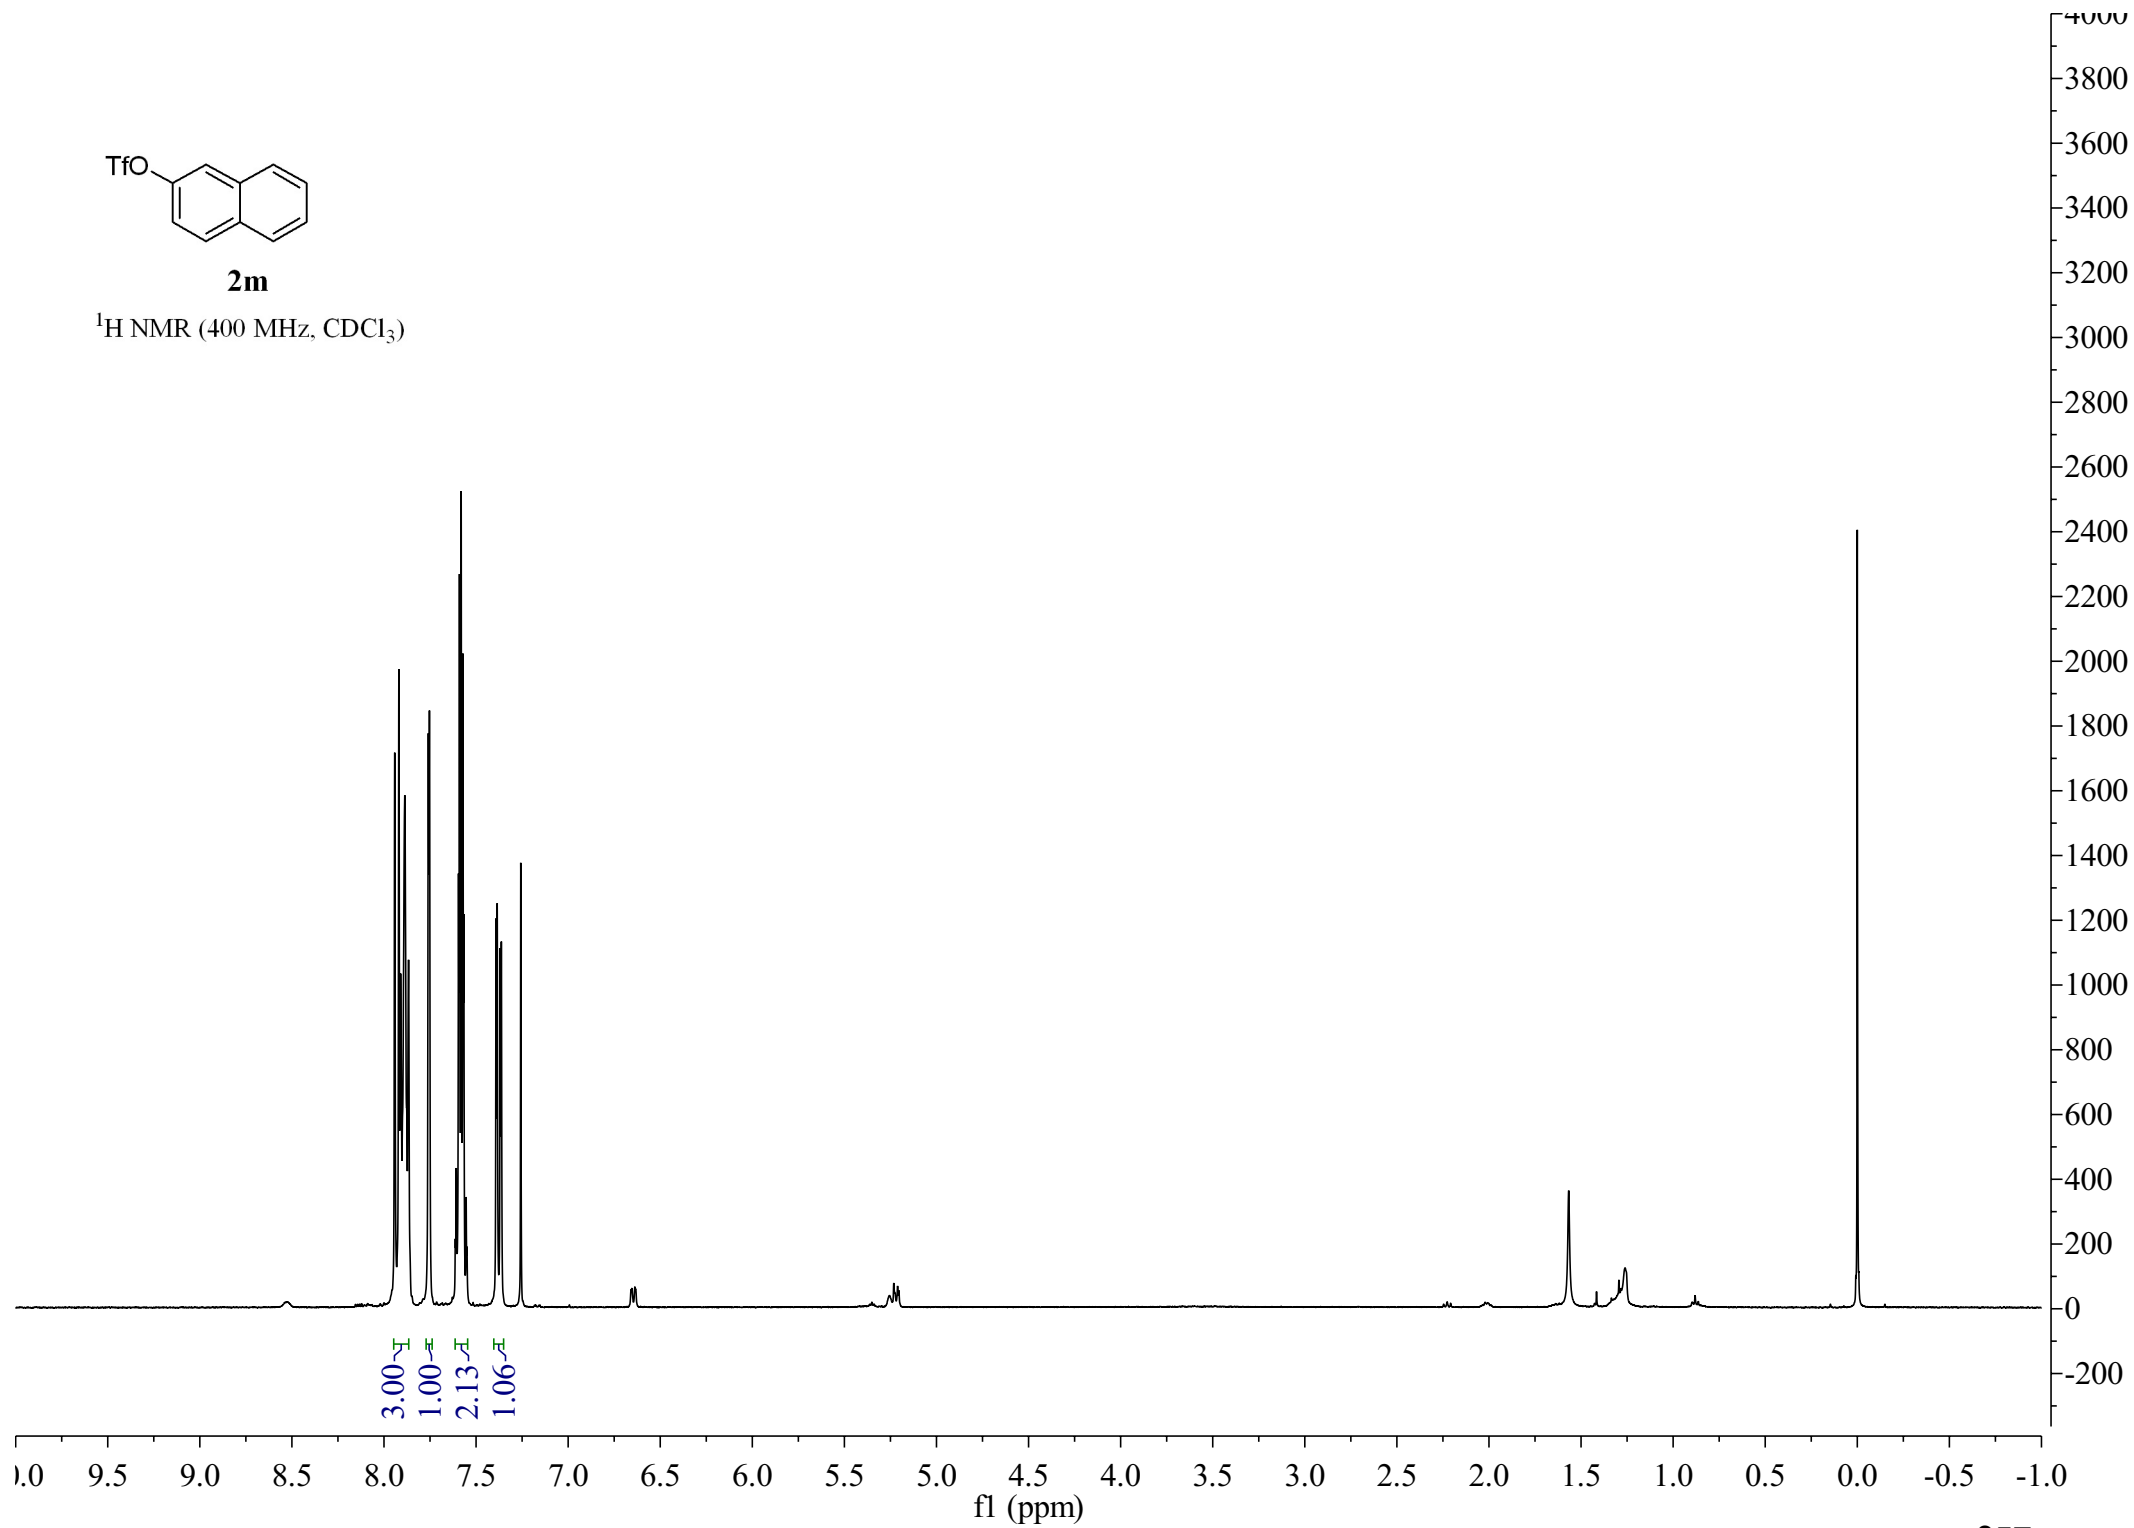

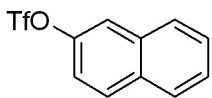

**2m**

$^{19}\text{F}$  NMR (376 MHz,  $\text{CDCl}_3$ )

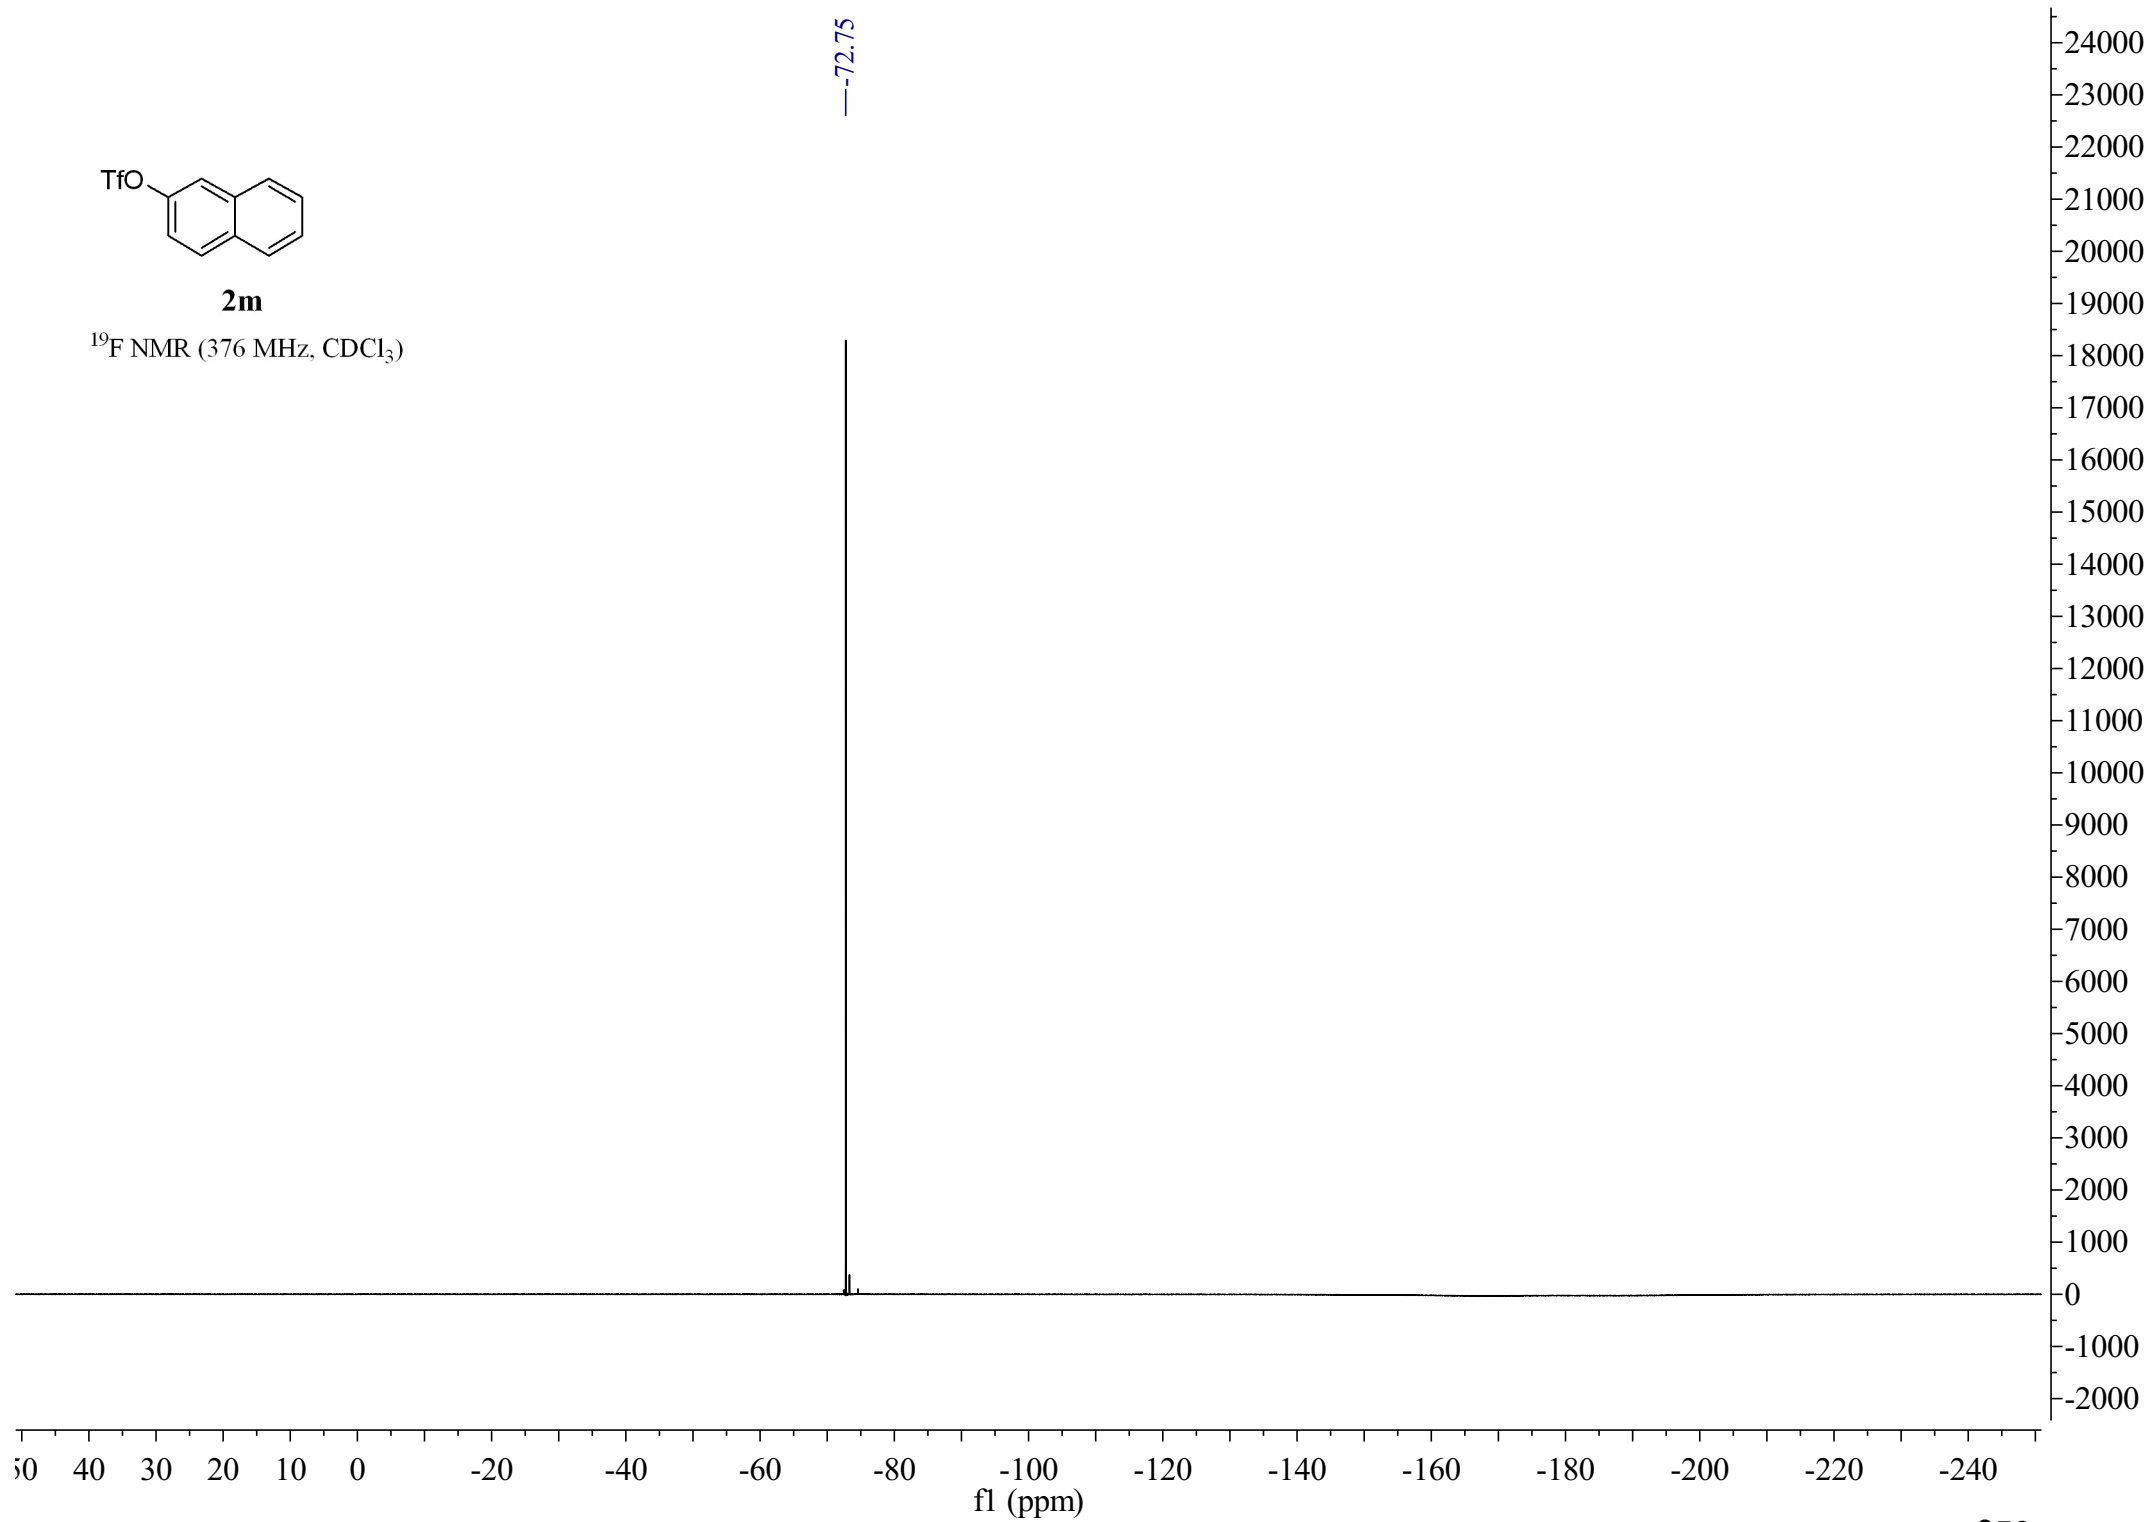

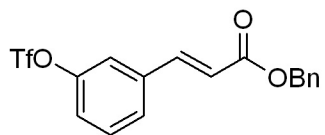

**2n**

<sup>1</sup>H NMR (400 MHz, CDCl<sub>3</sub>)

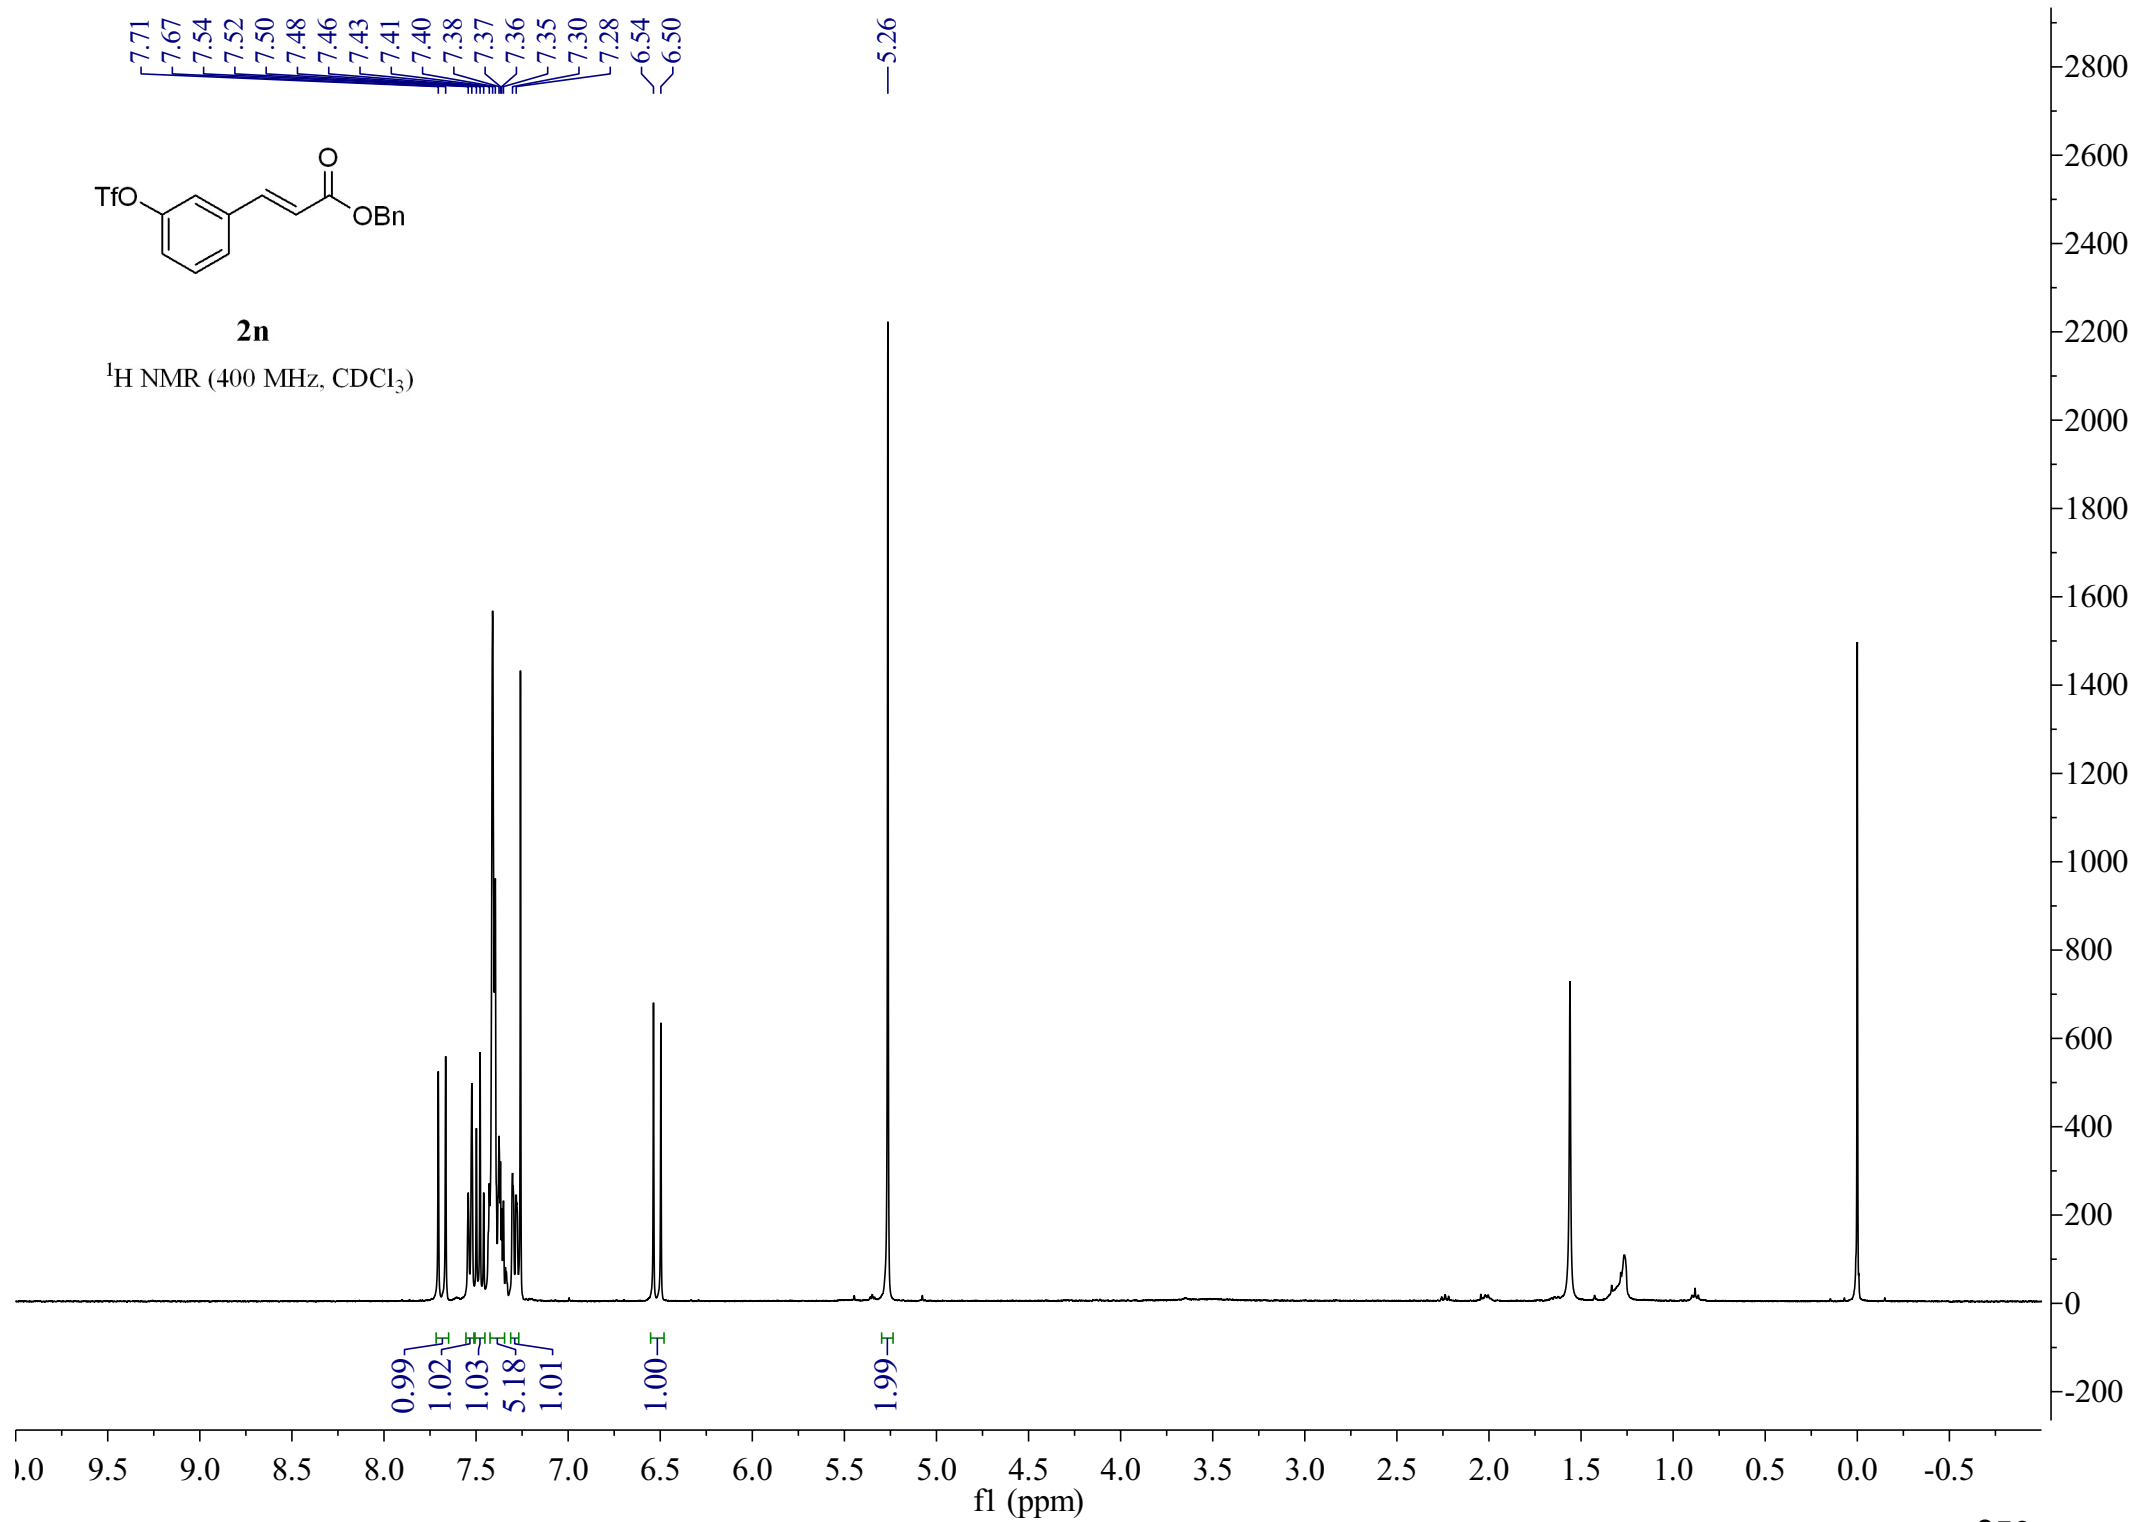

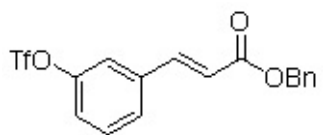

**2n**

$^{13}\text{C}\{^1\text{H}\}$  NMR (150 MHz,  $\text{CDCl}_3$ )

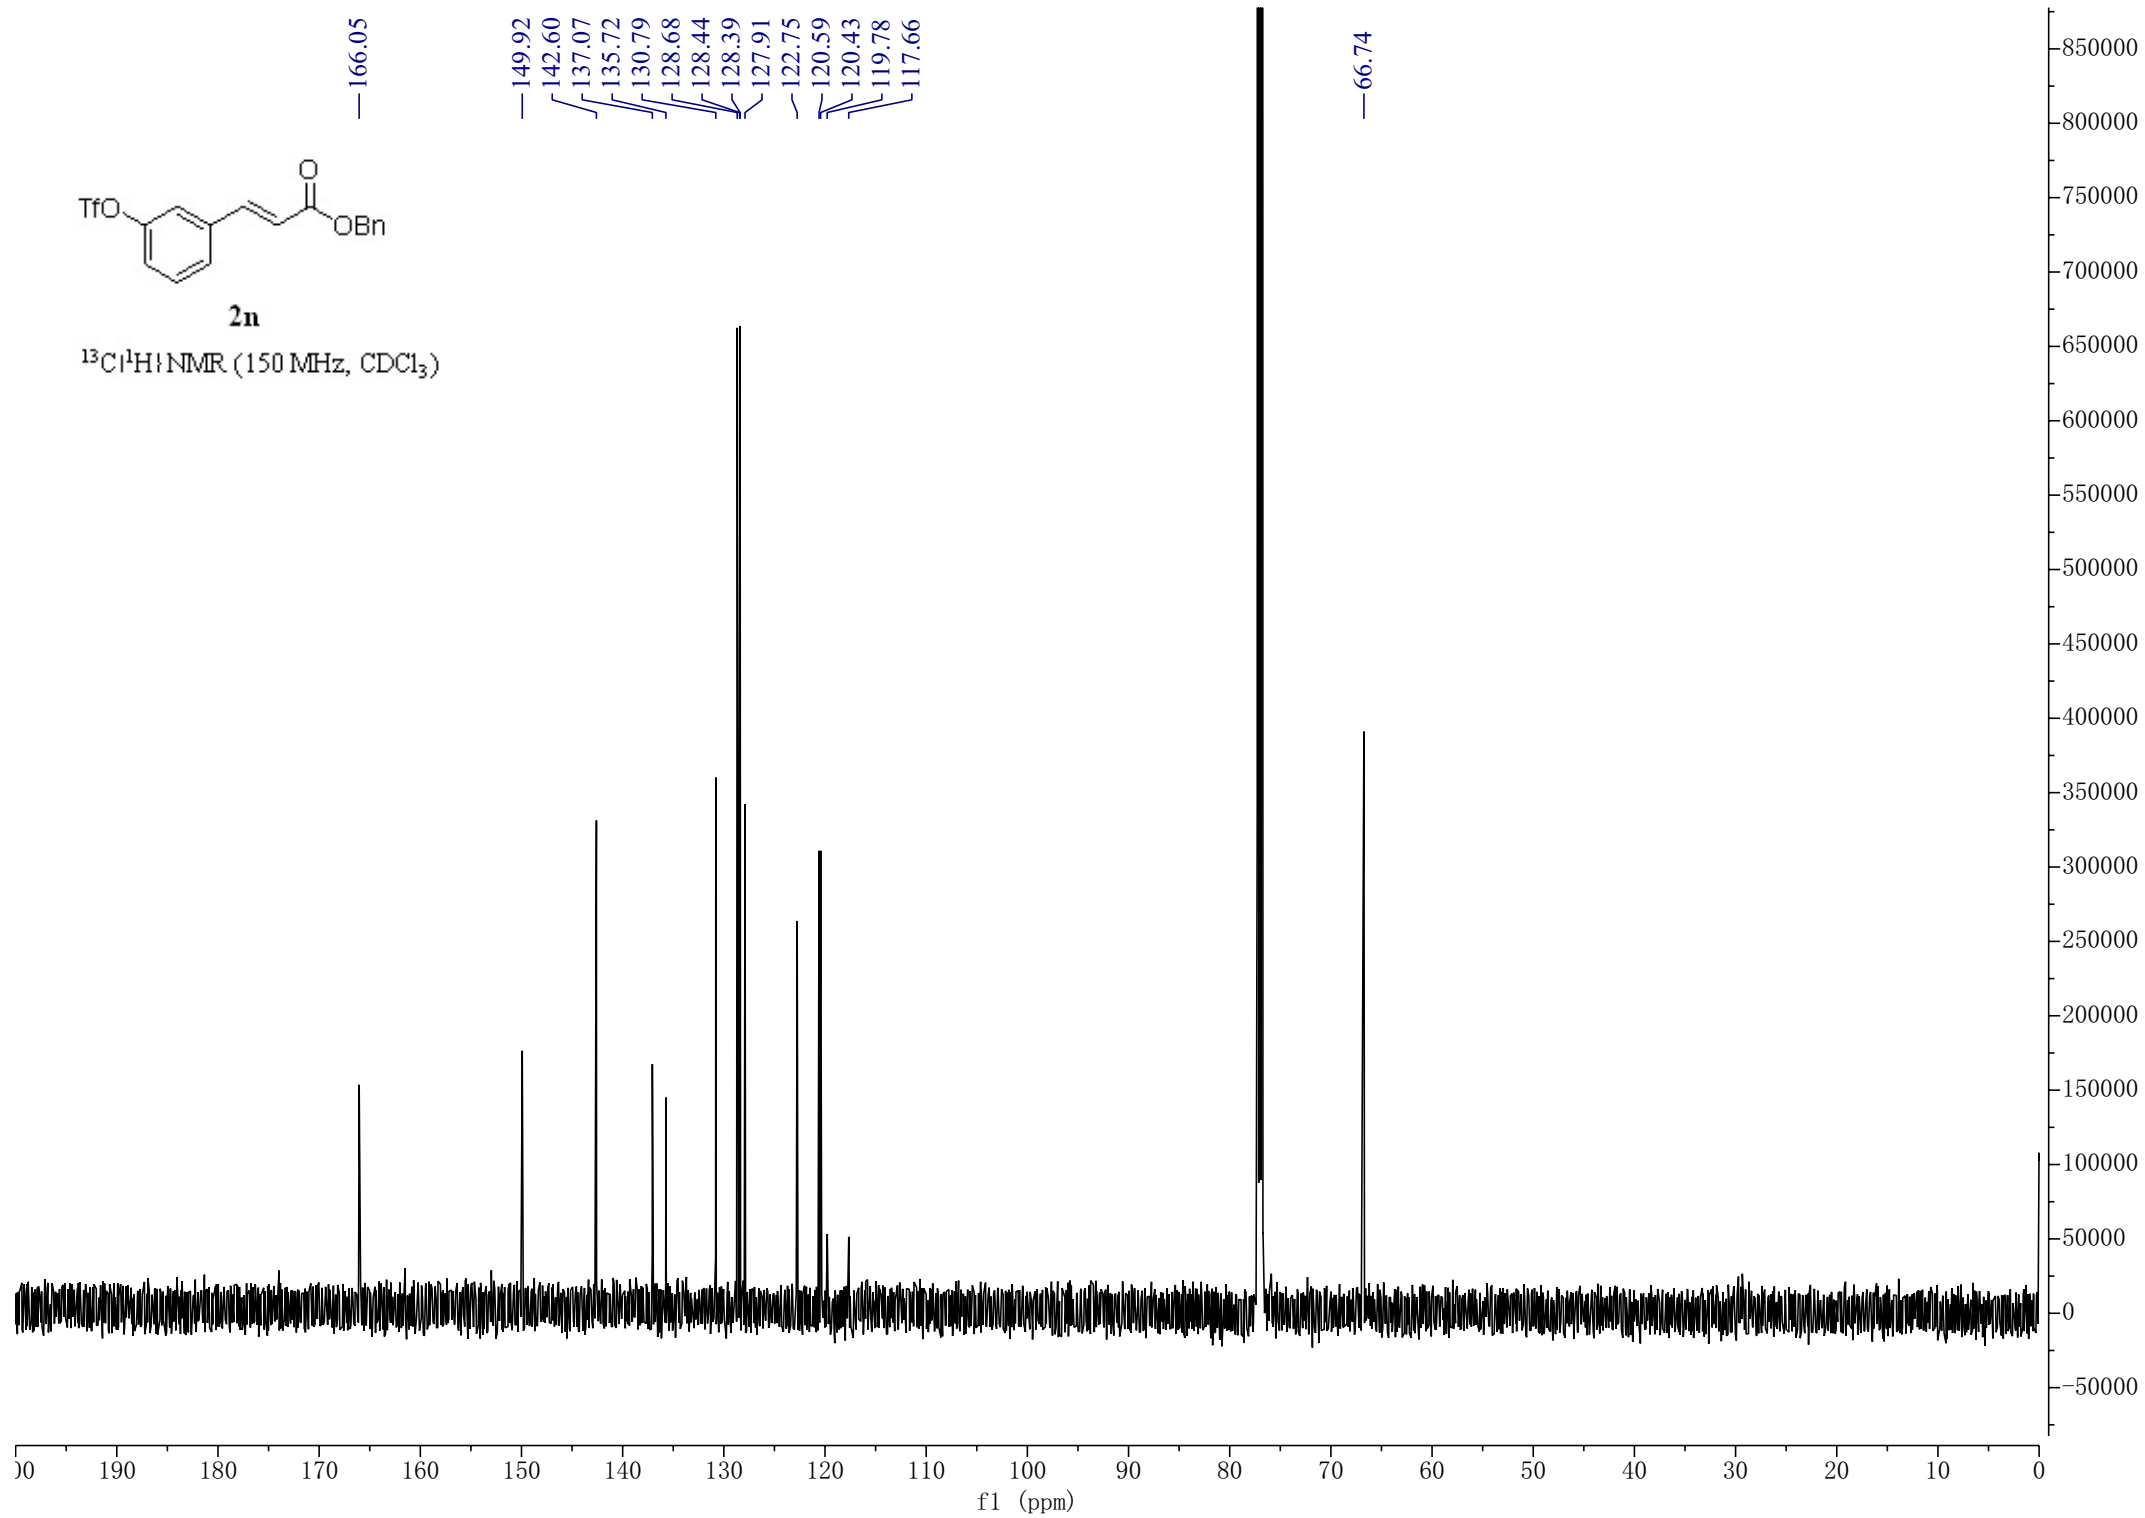

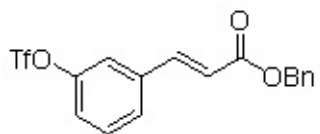

**2n**

<sup>19</sup>F NMR (565 MHz, CDCl<sub>3</sub>)

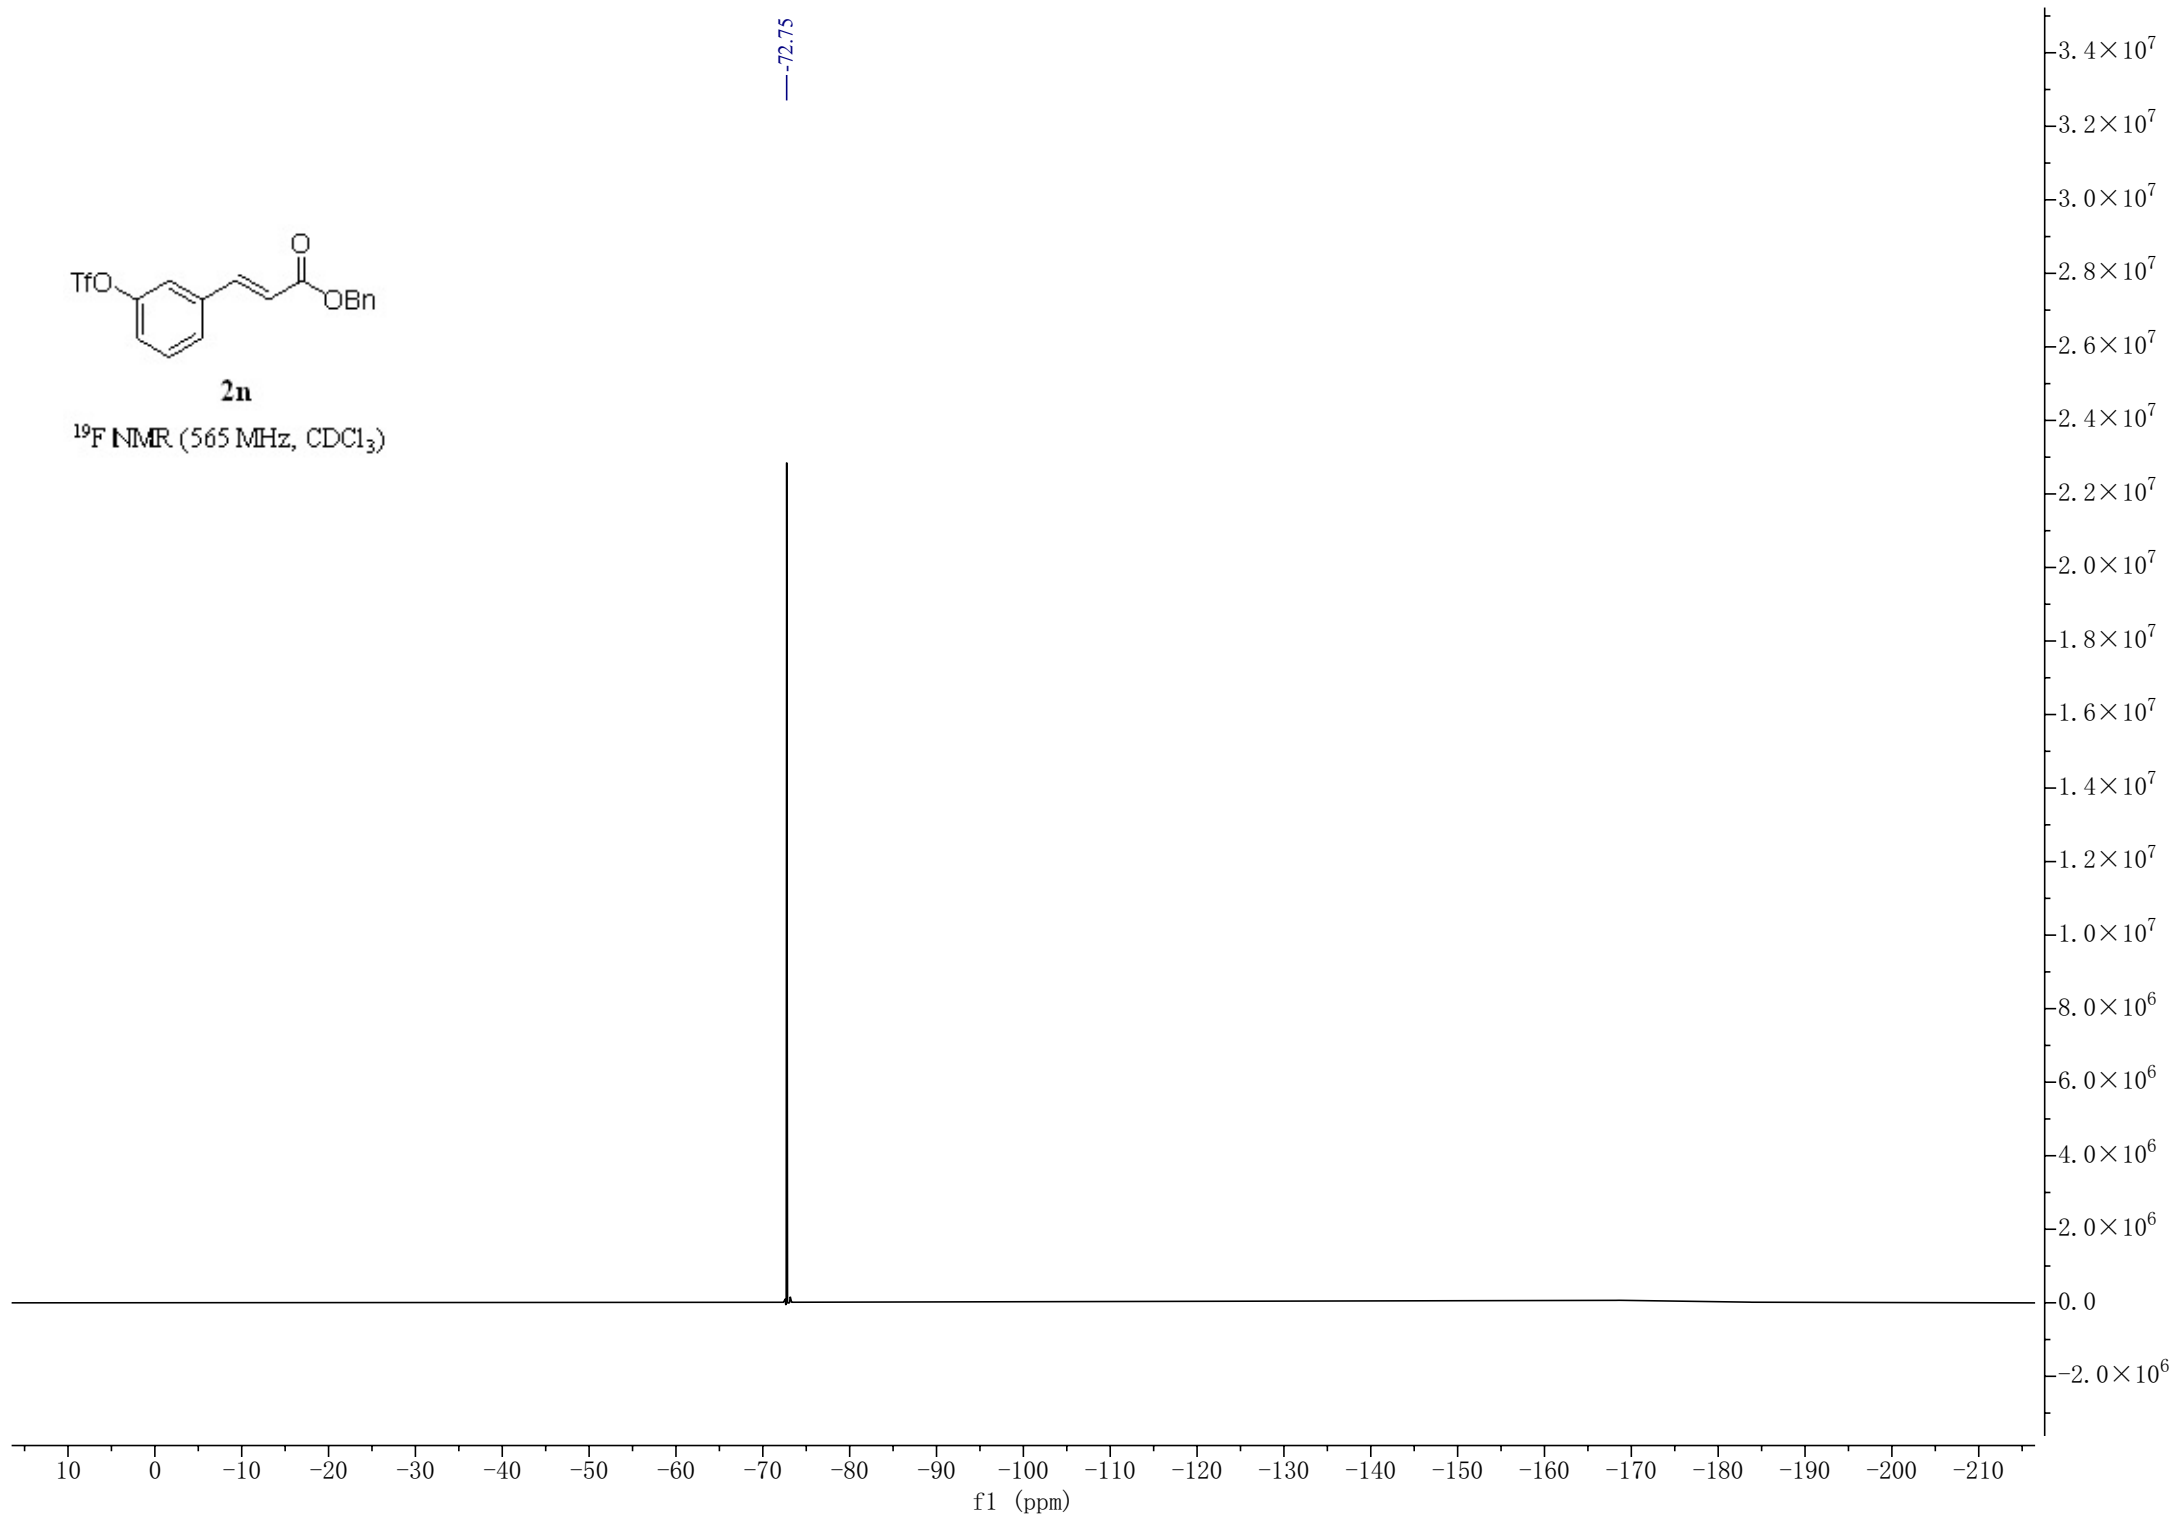

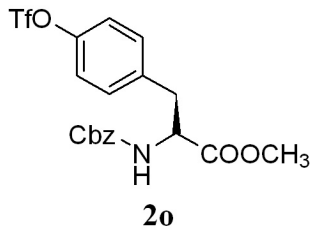

<sup>1</sup>H NMR (400 MHz, CDCl<sub>3</sub>)

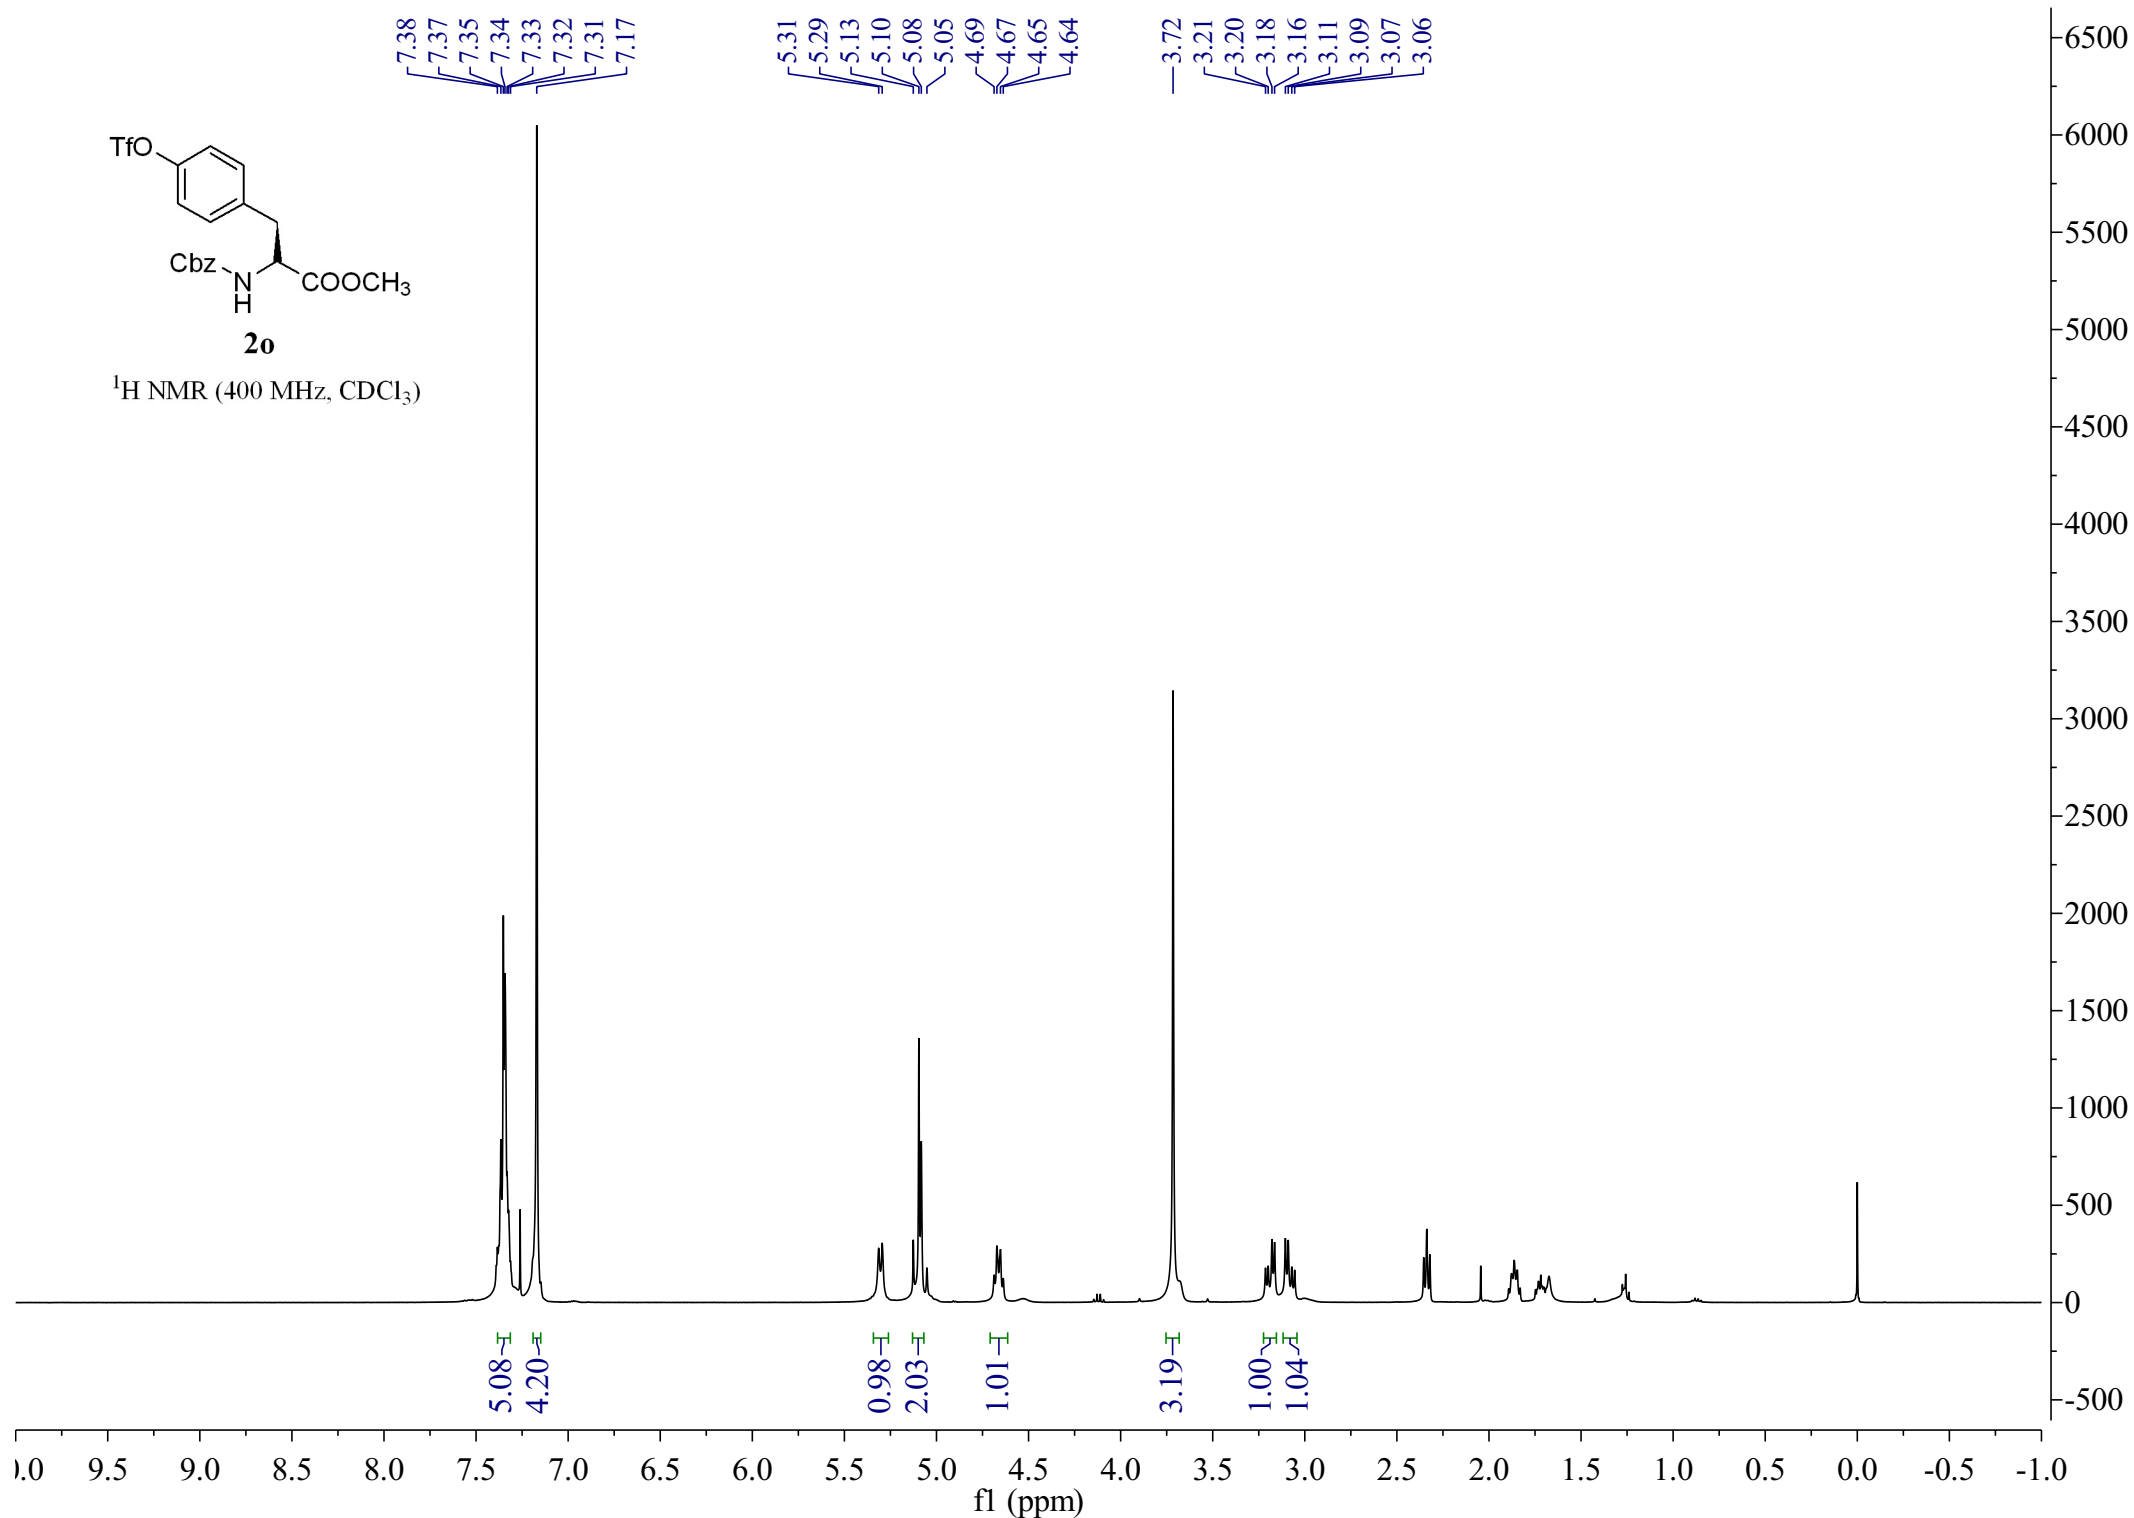

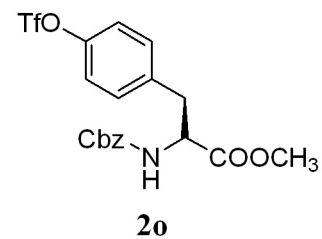

$^{13}\text{C}\{^1\text{H}\}$  NMR (100 MHz,  $\text{CDCl}_3$ )

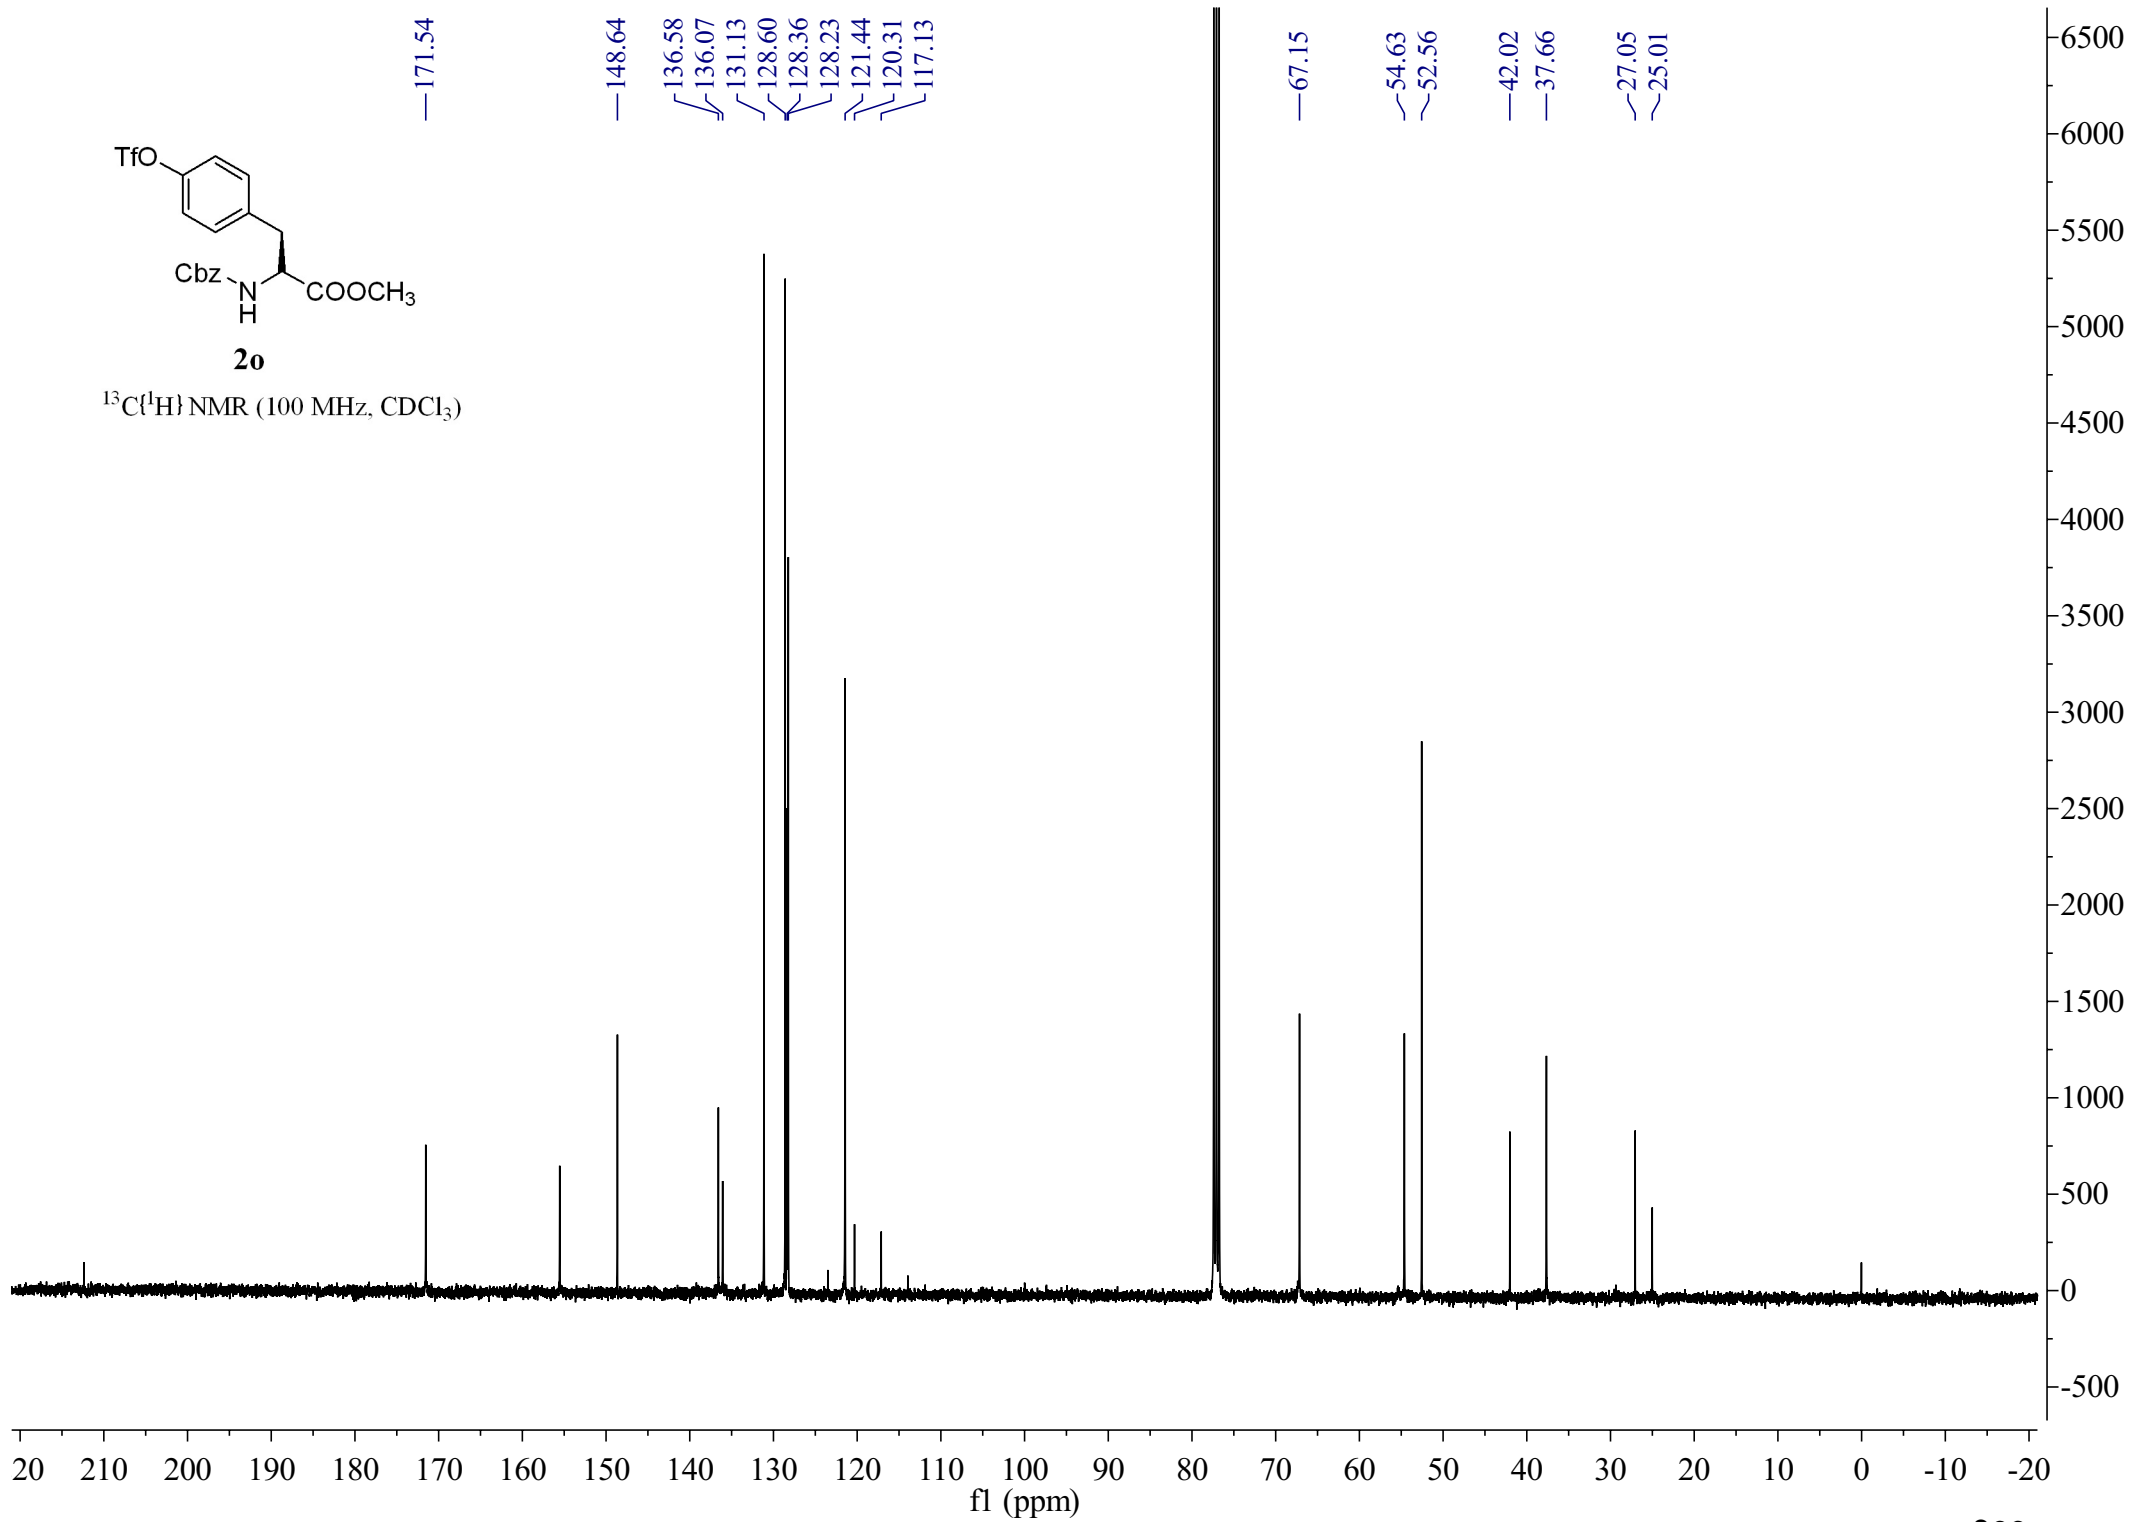

LFX10052  
LFX10052

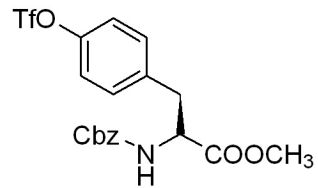

**2o**

<sup>19</sup>F NMR (376 MHz, CDCl<sub>3</sub>)

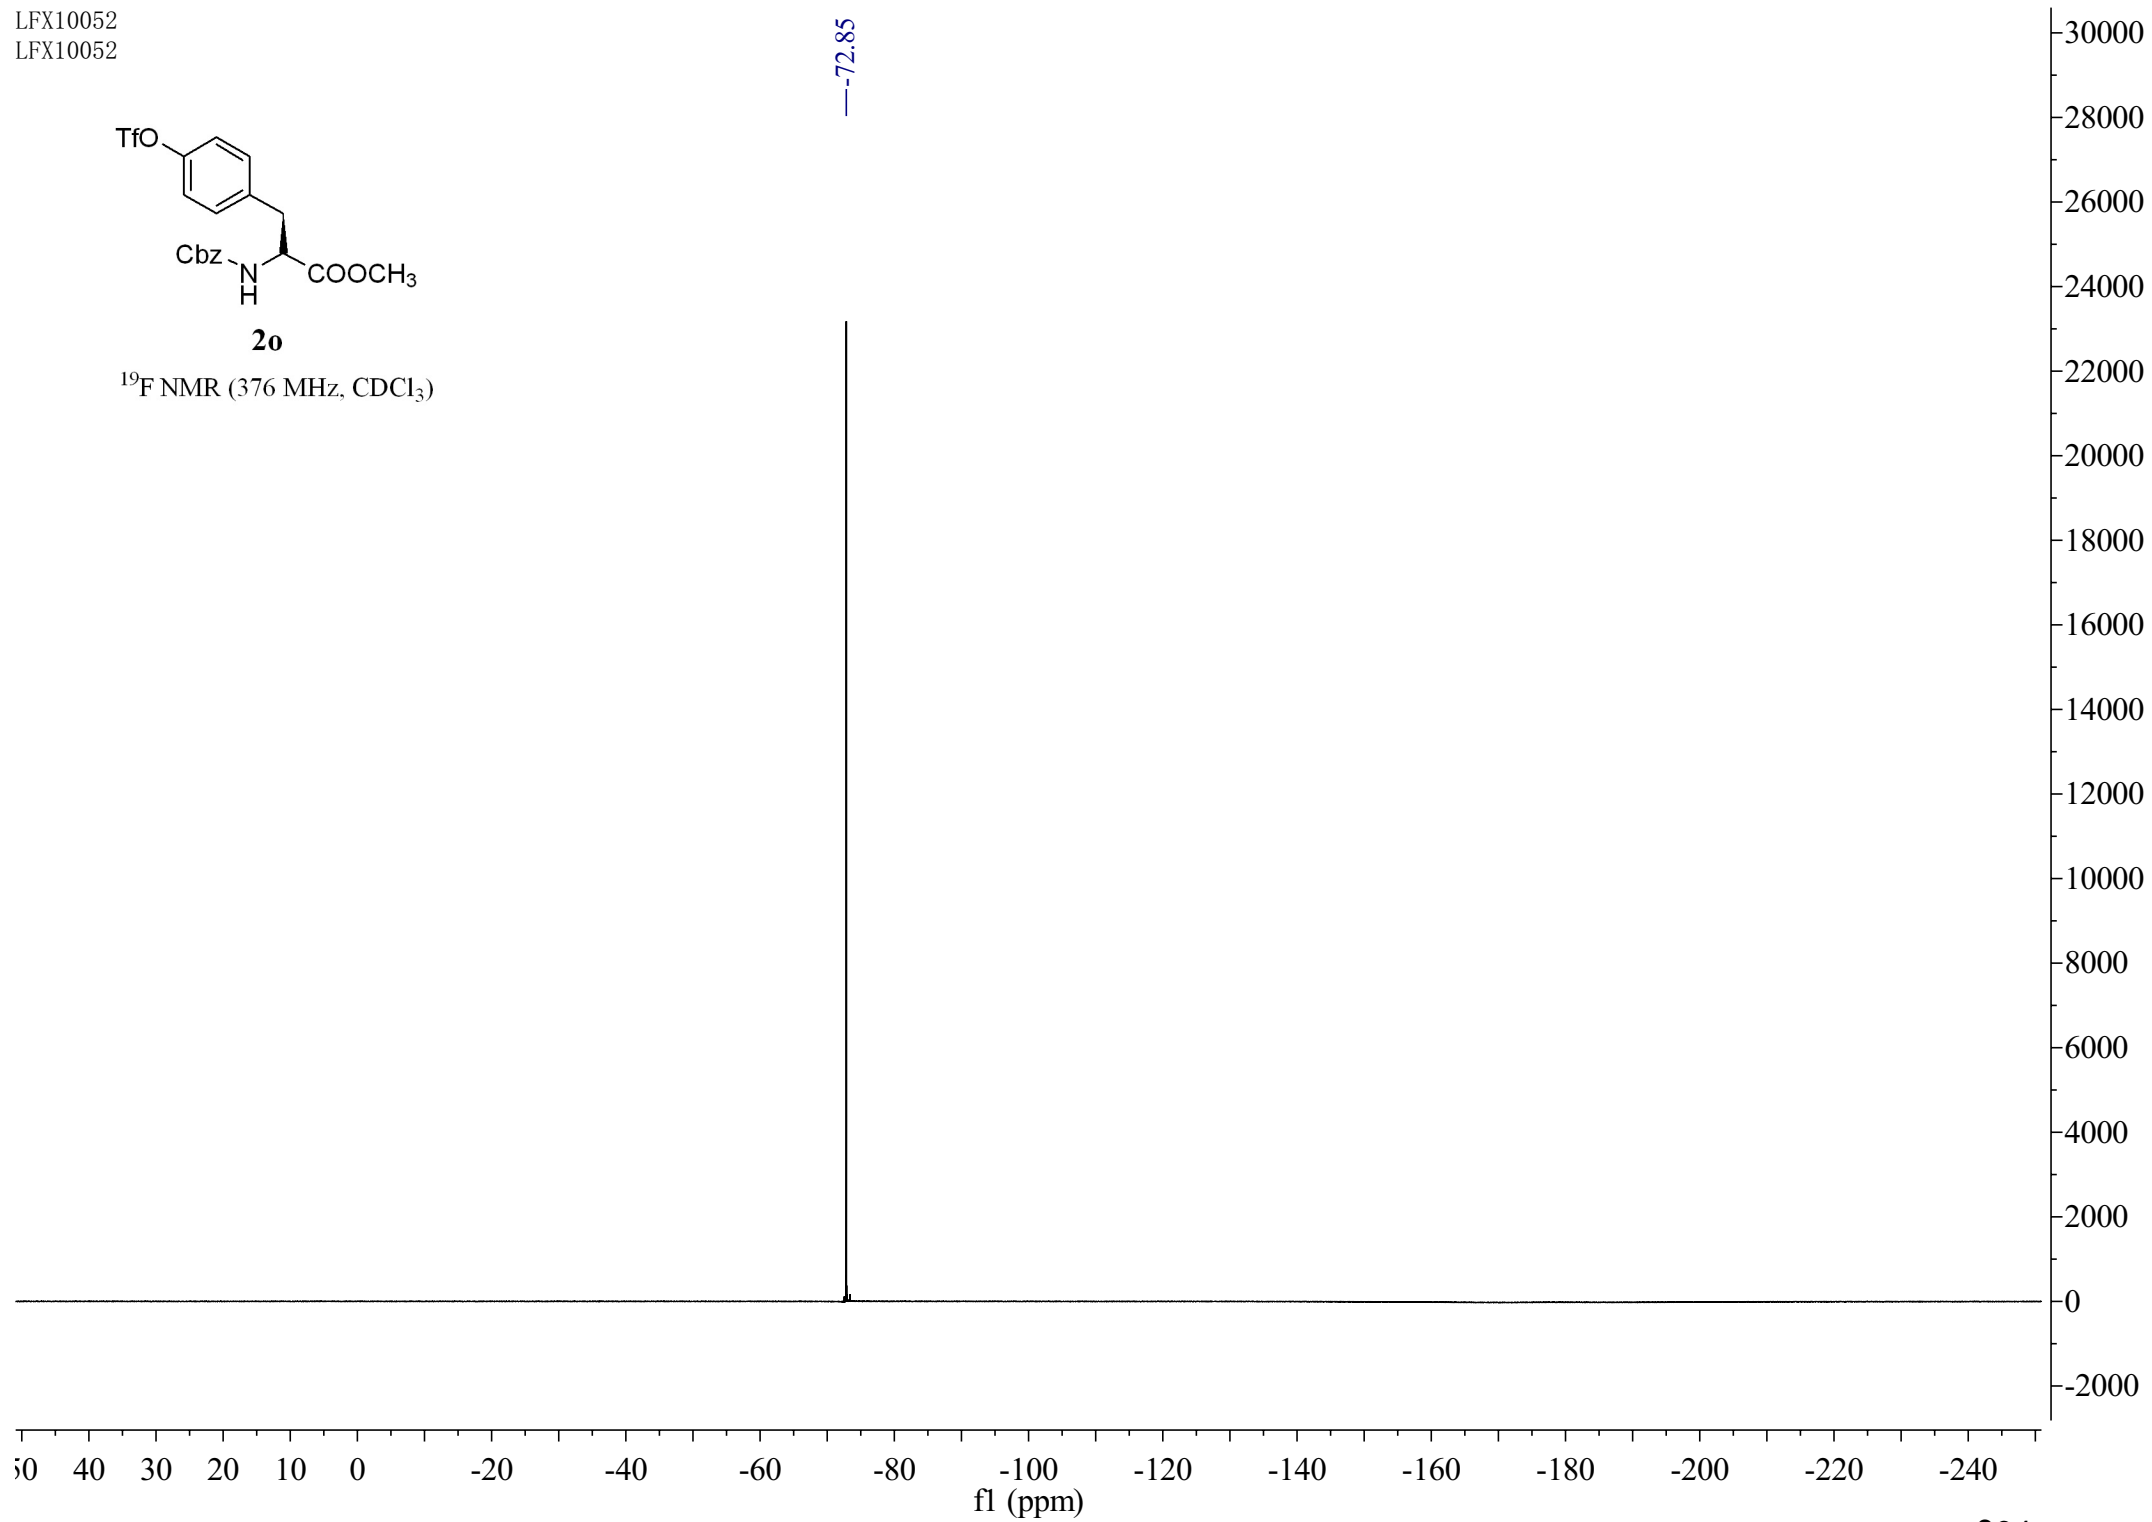



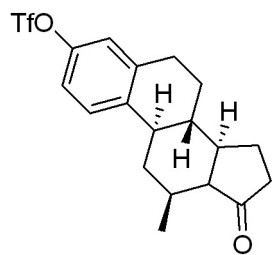

**2p**

<sup>1</sup>H NMR (400 MHz, CDCl<sub>3</sub>)

7.36  
7.33  
7.05  
7.05  
7.03  
7.02  
7.00  
6.99

2.96  
2.95  
2.94  
2.93

2.49  
2.19  
2.06  
2.00

1.64  
1.64  
1.61  
1.60  
1.58

0.92

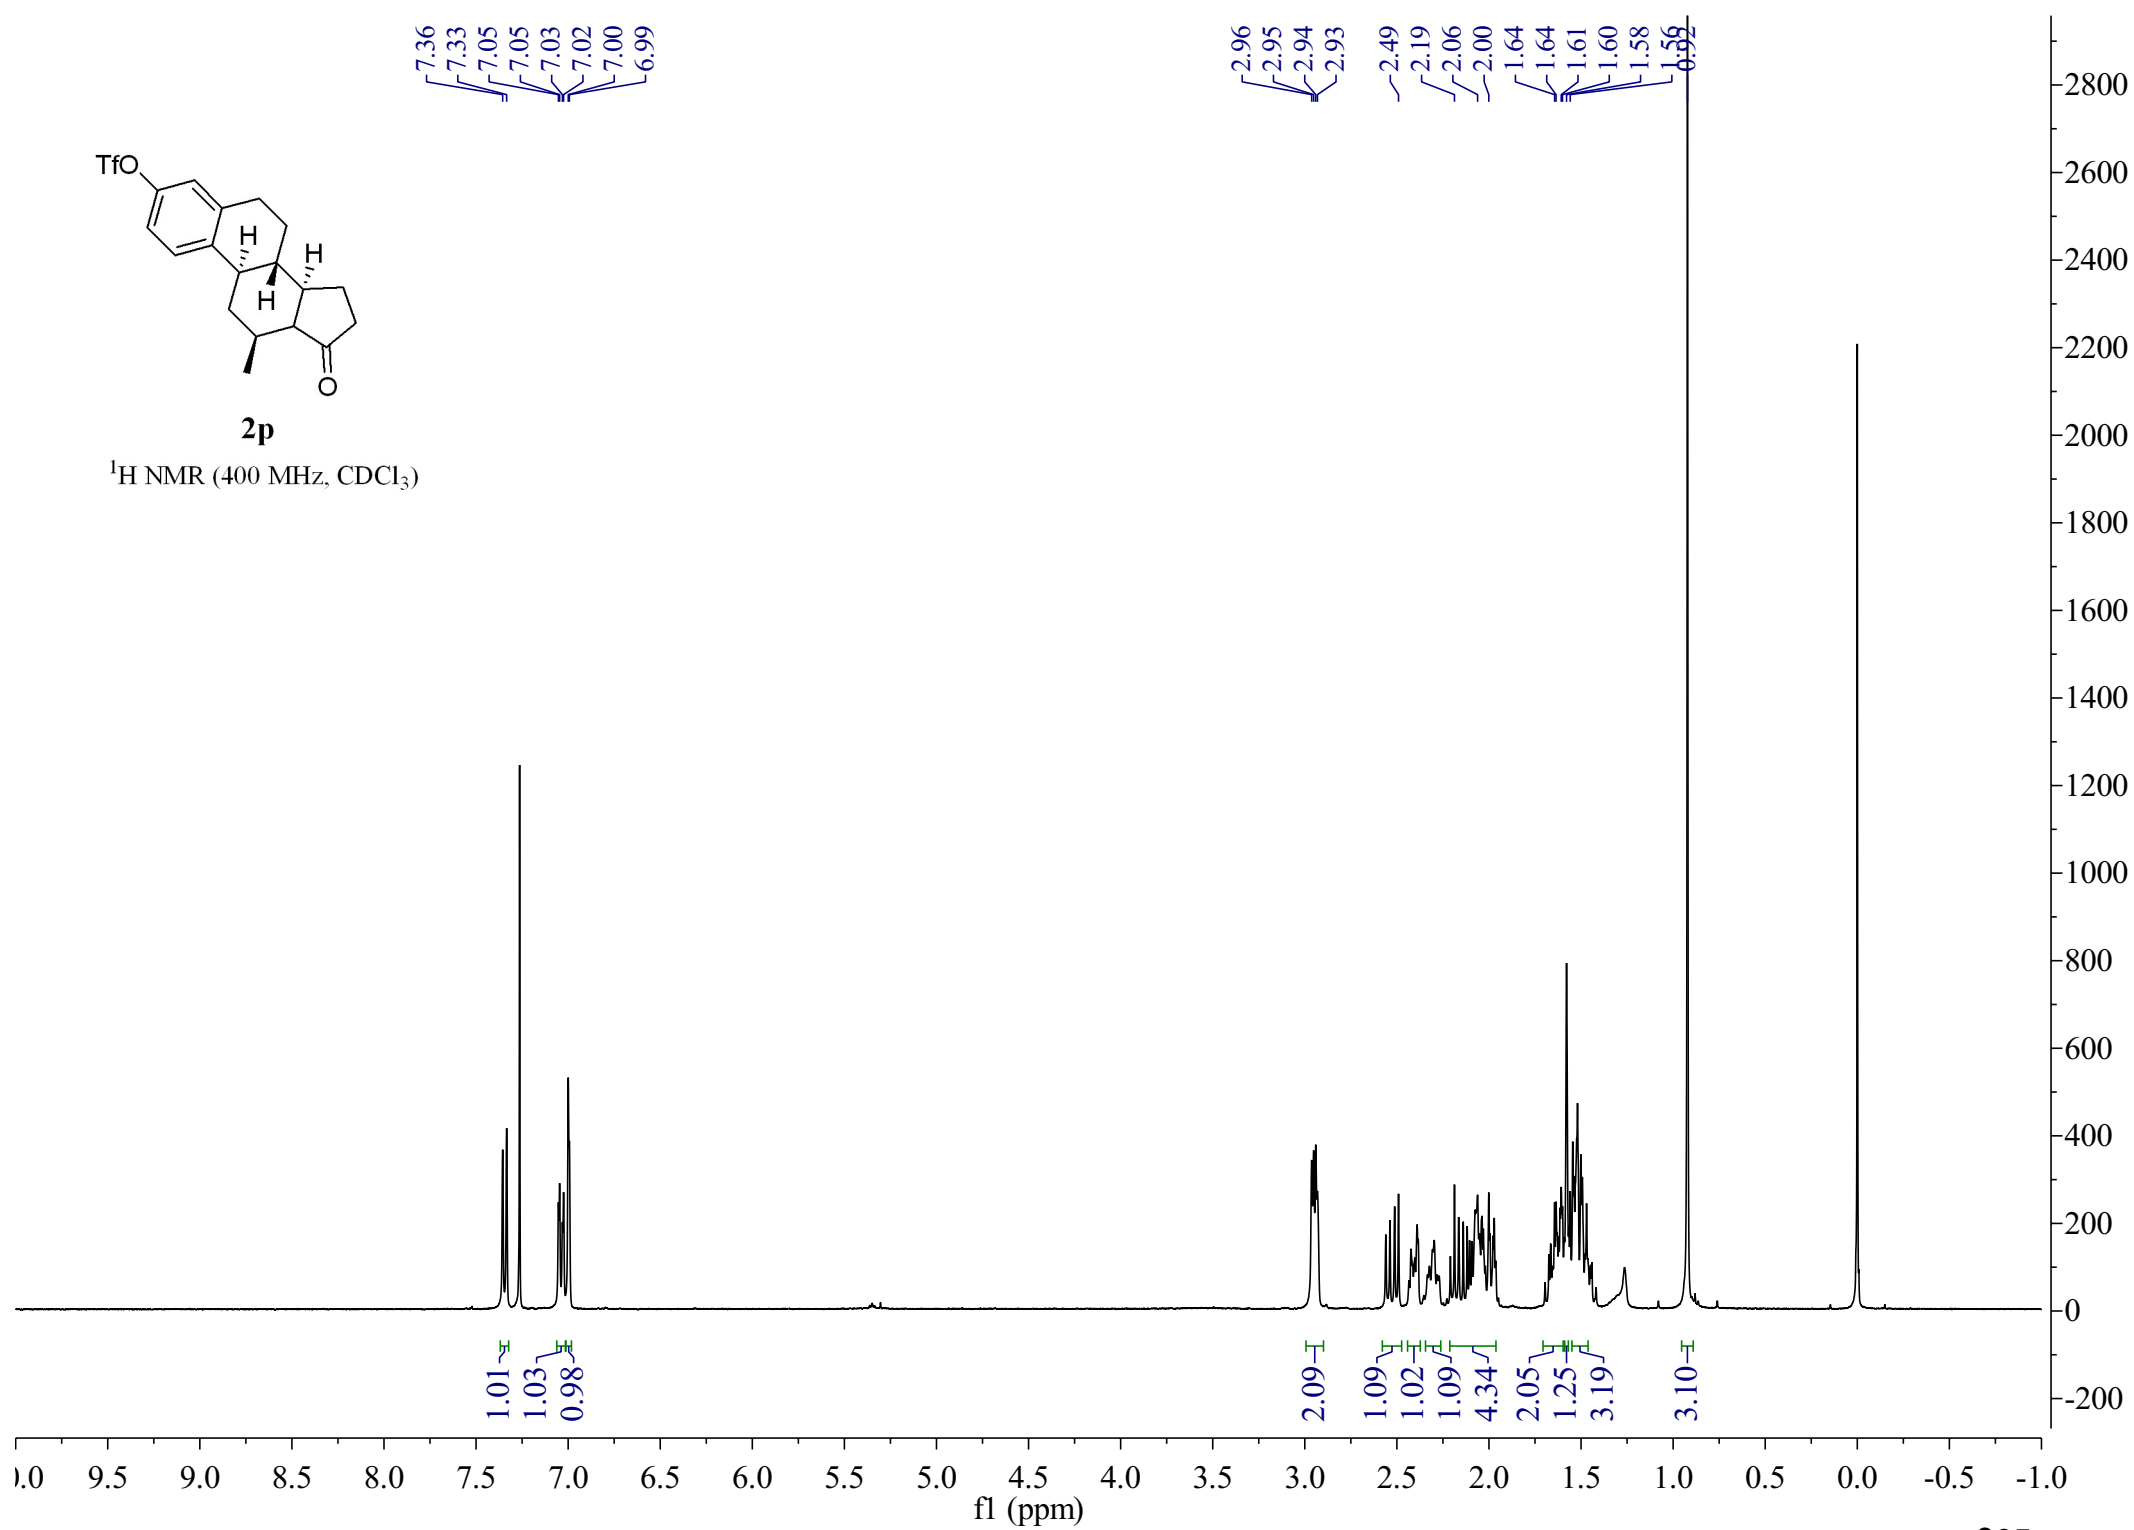

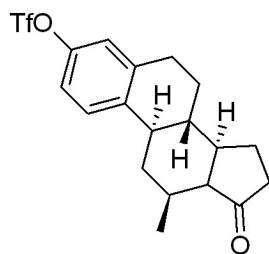

**2p**

$^{13}\text{C}\{^1\text{H}\}$  NMR (100 MHz,  $\text{CDCl}_3$ )

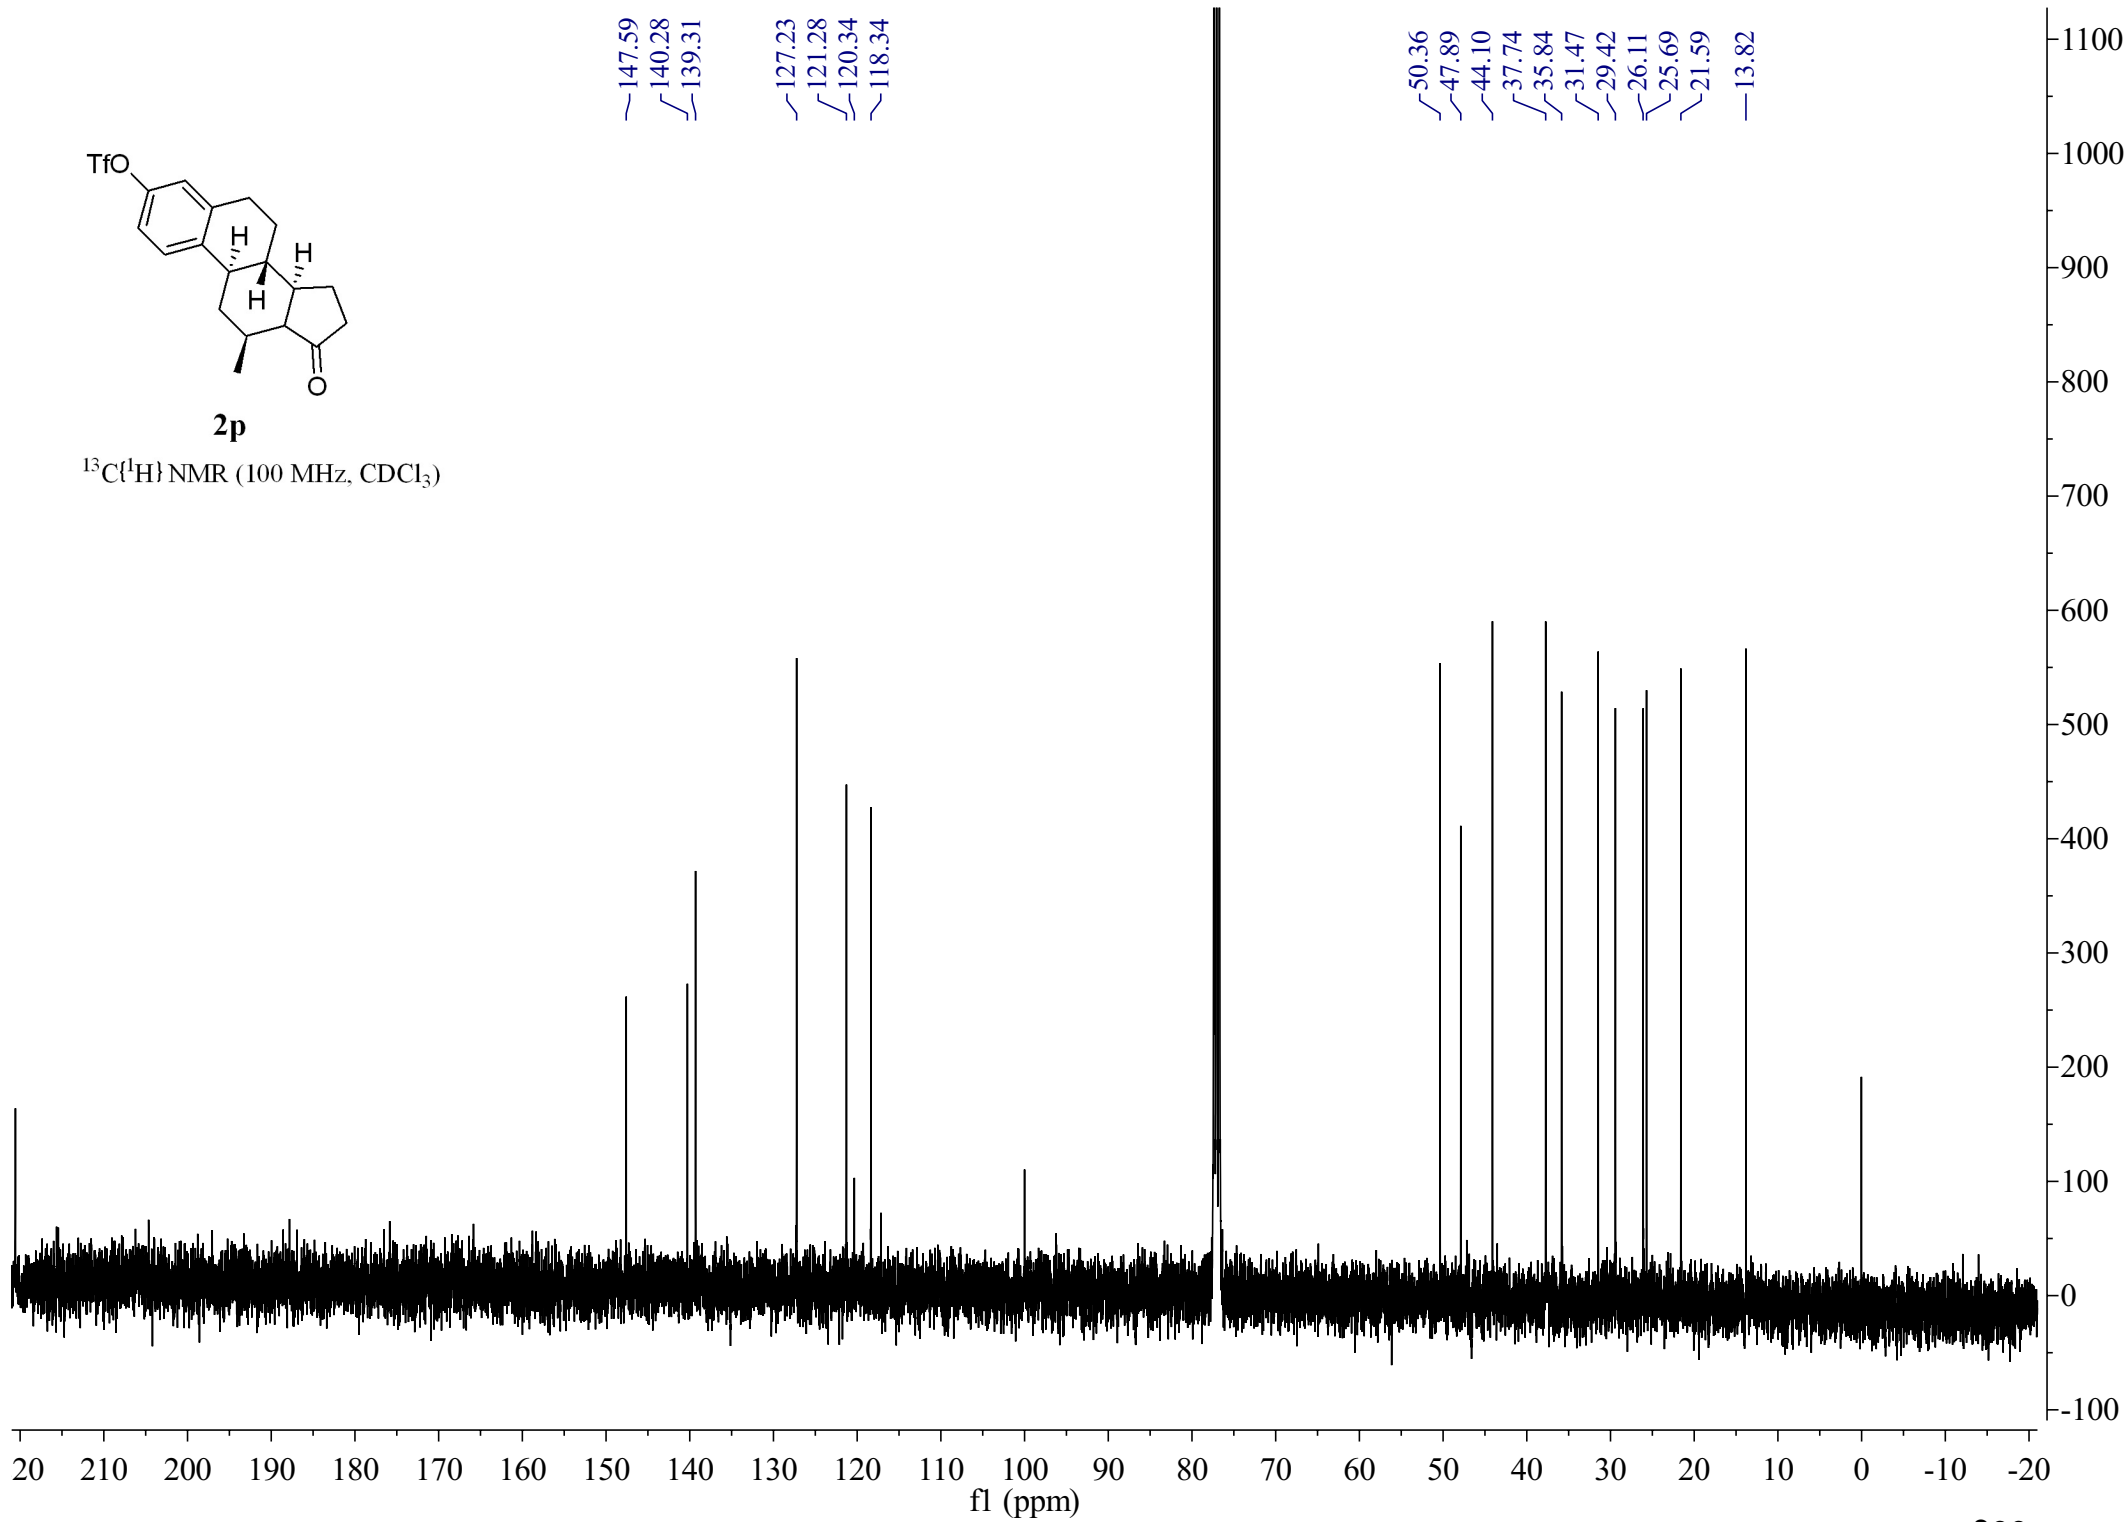

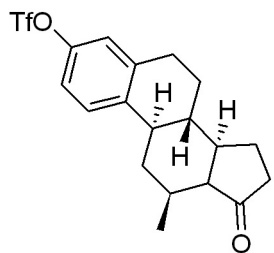

**2p**

$^{19}\text{F}$  NMR (376 MHz,  $\text{CDCl}_3$ )

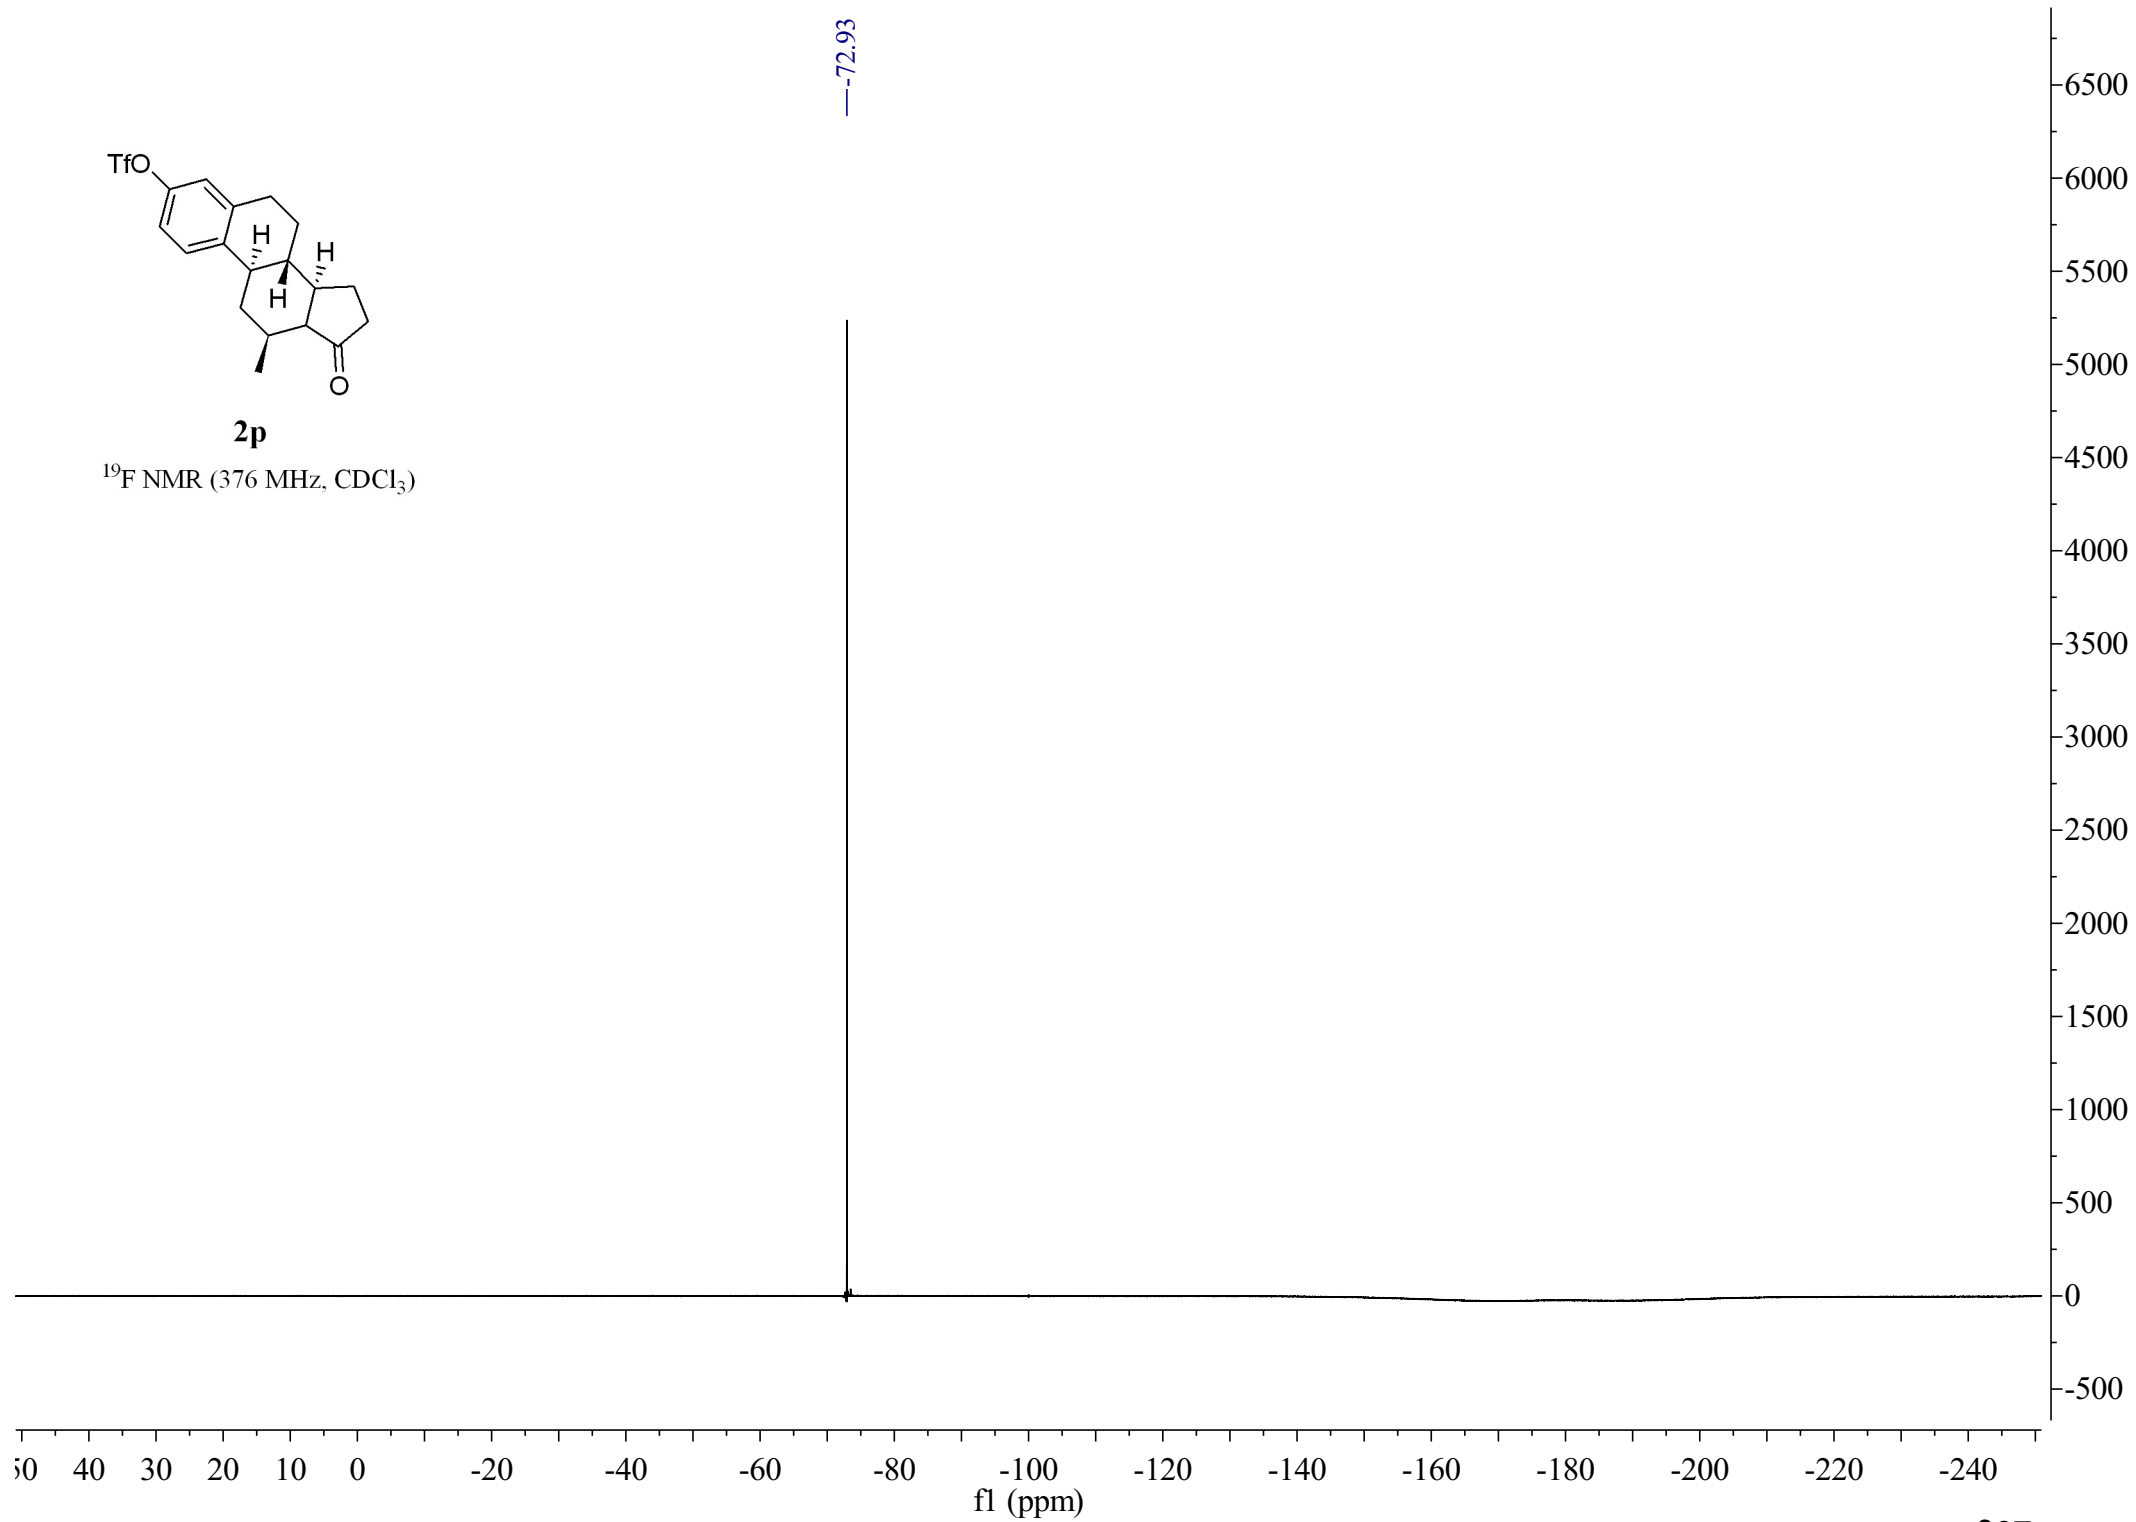

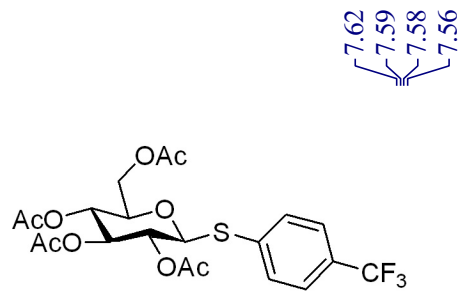

**12a**

<sup>1</sup>H NMR (400 MHz, CDCl<sub>3</sub>)

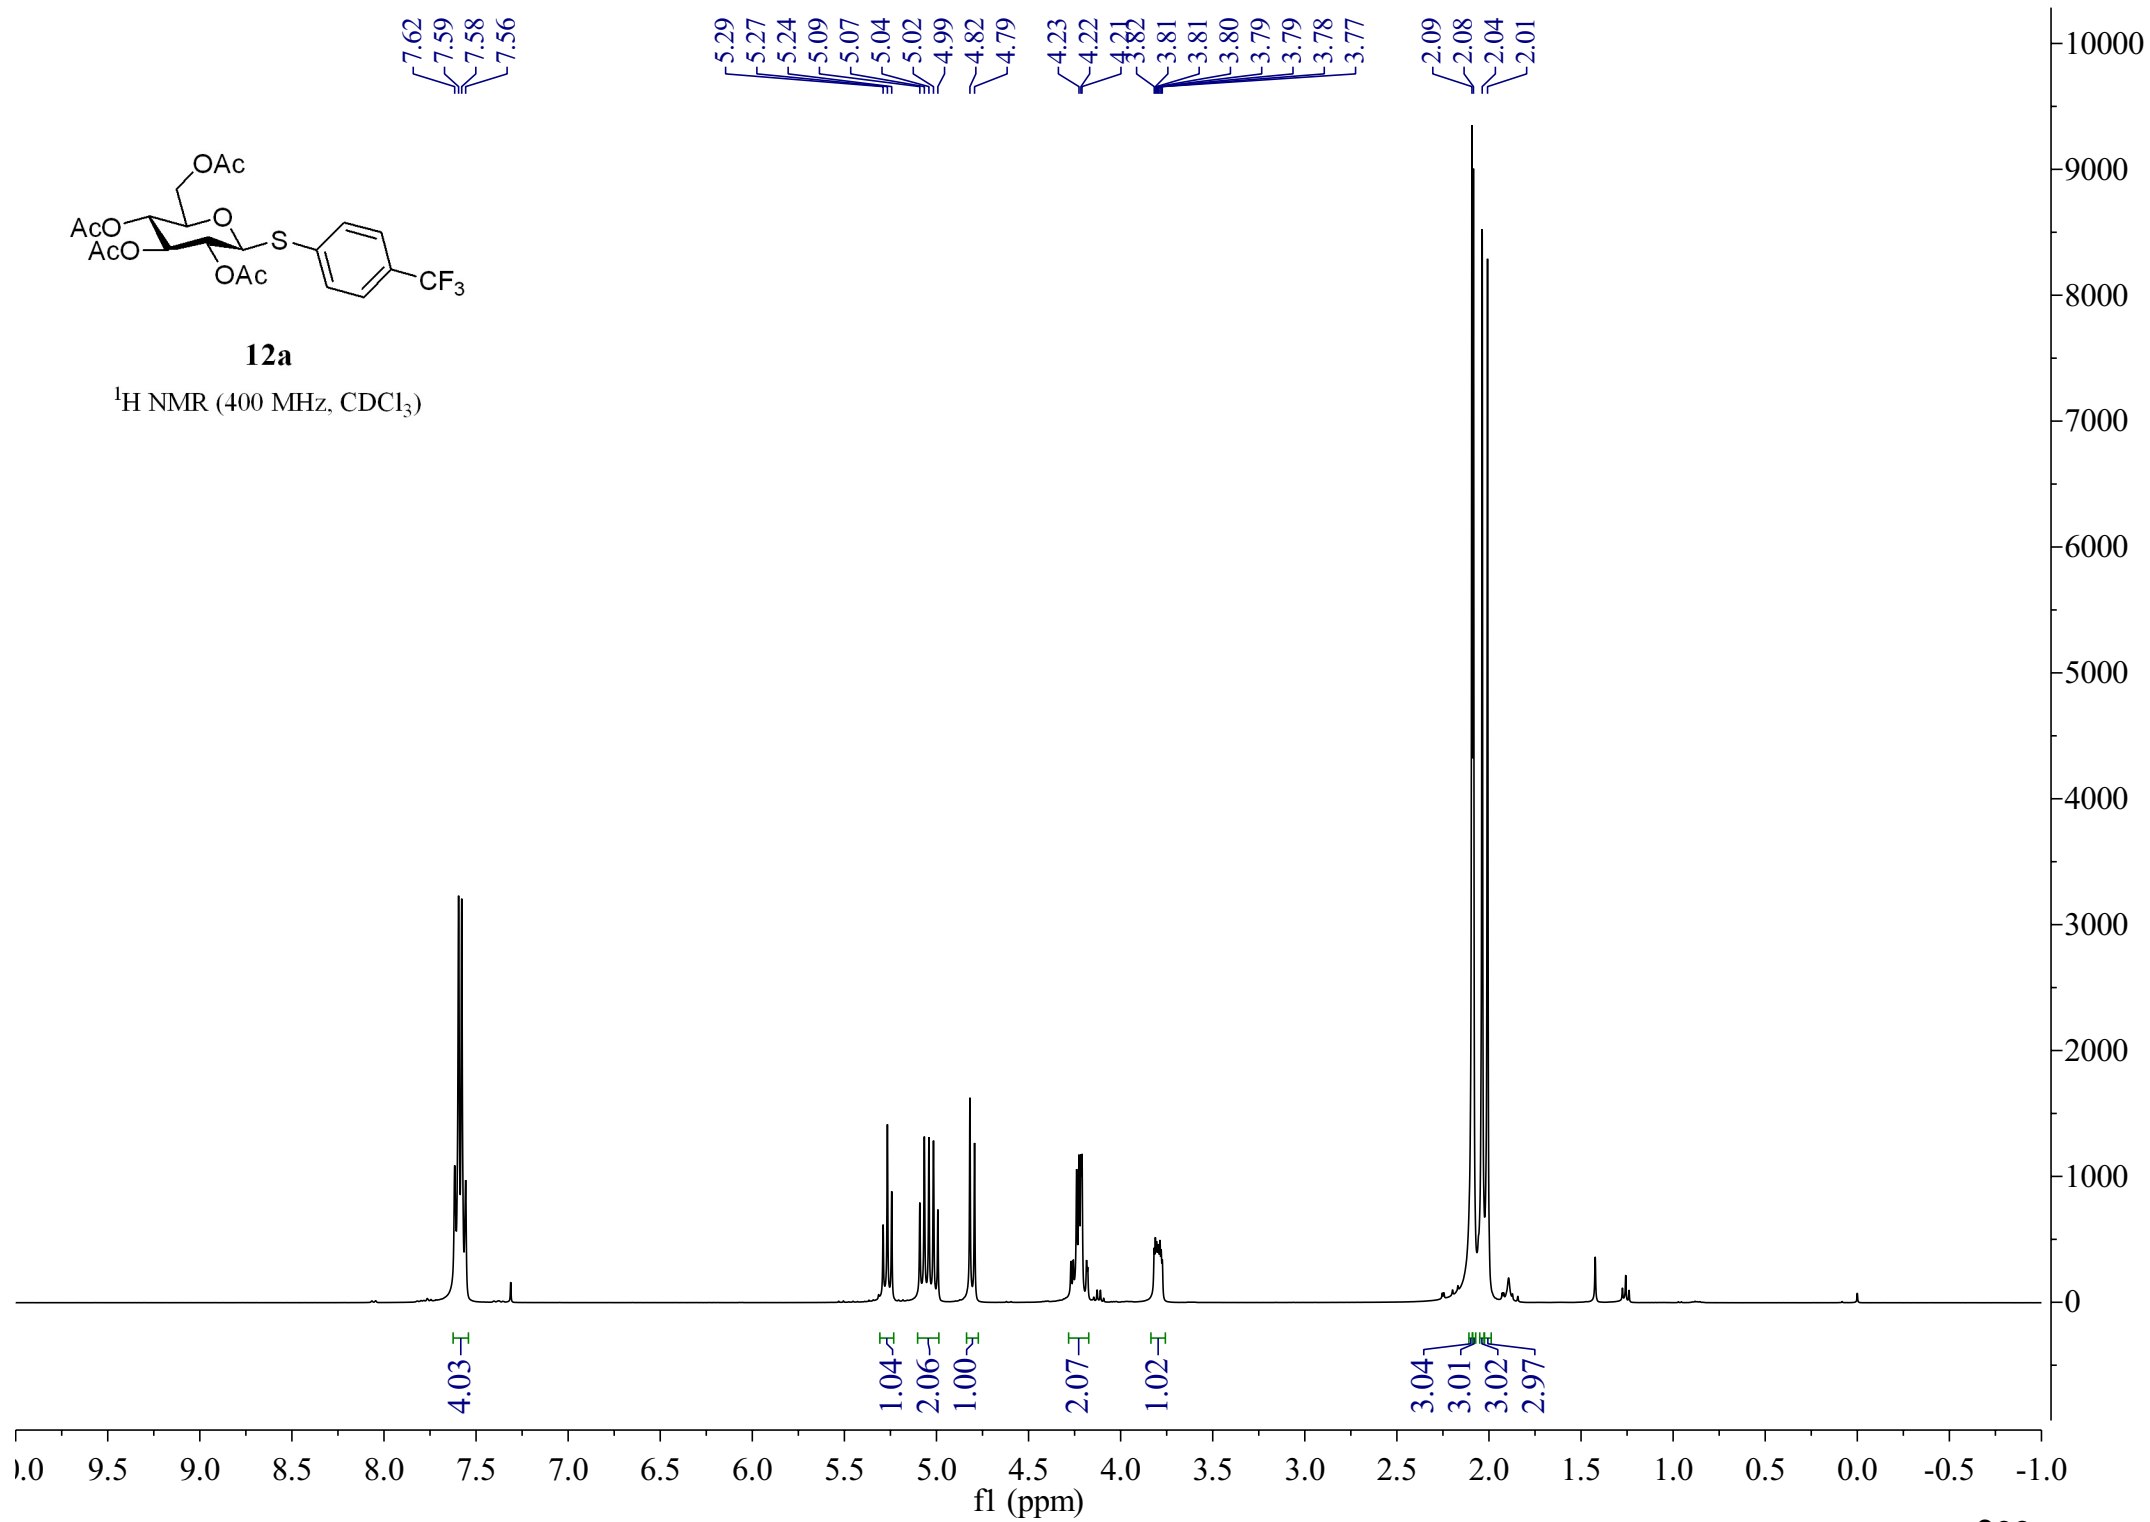

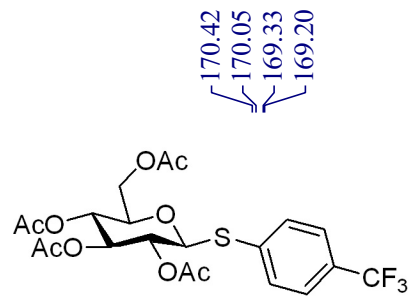

**12a**

$^{13}\text{C}\{^1\text{H}\}$  NMR (100 MHz,  $\text{CDCl}_3$ )

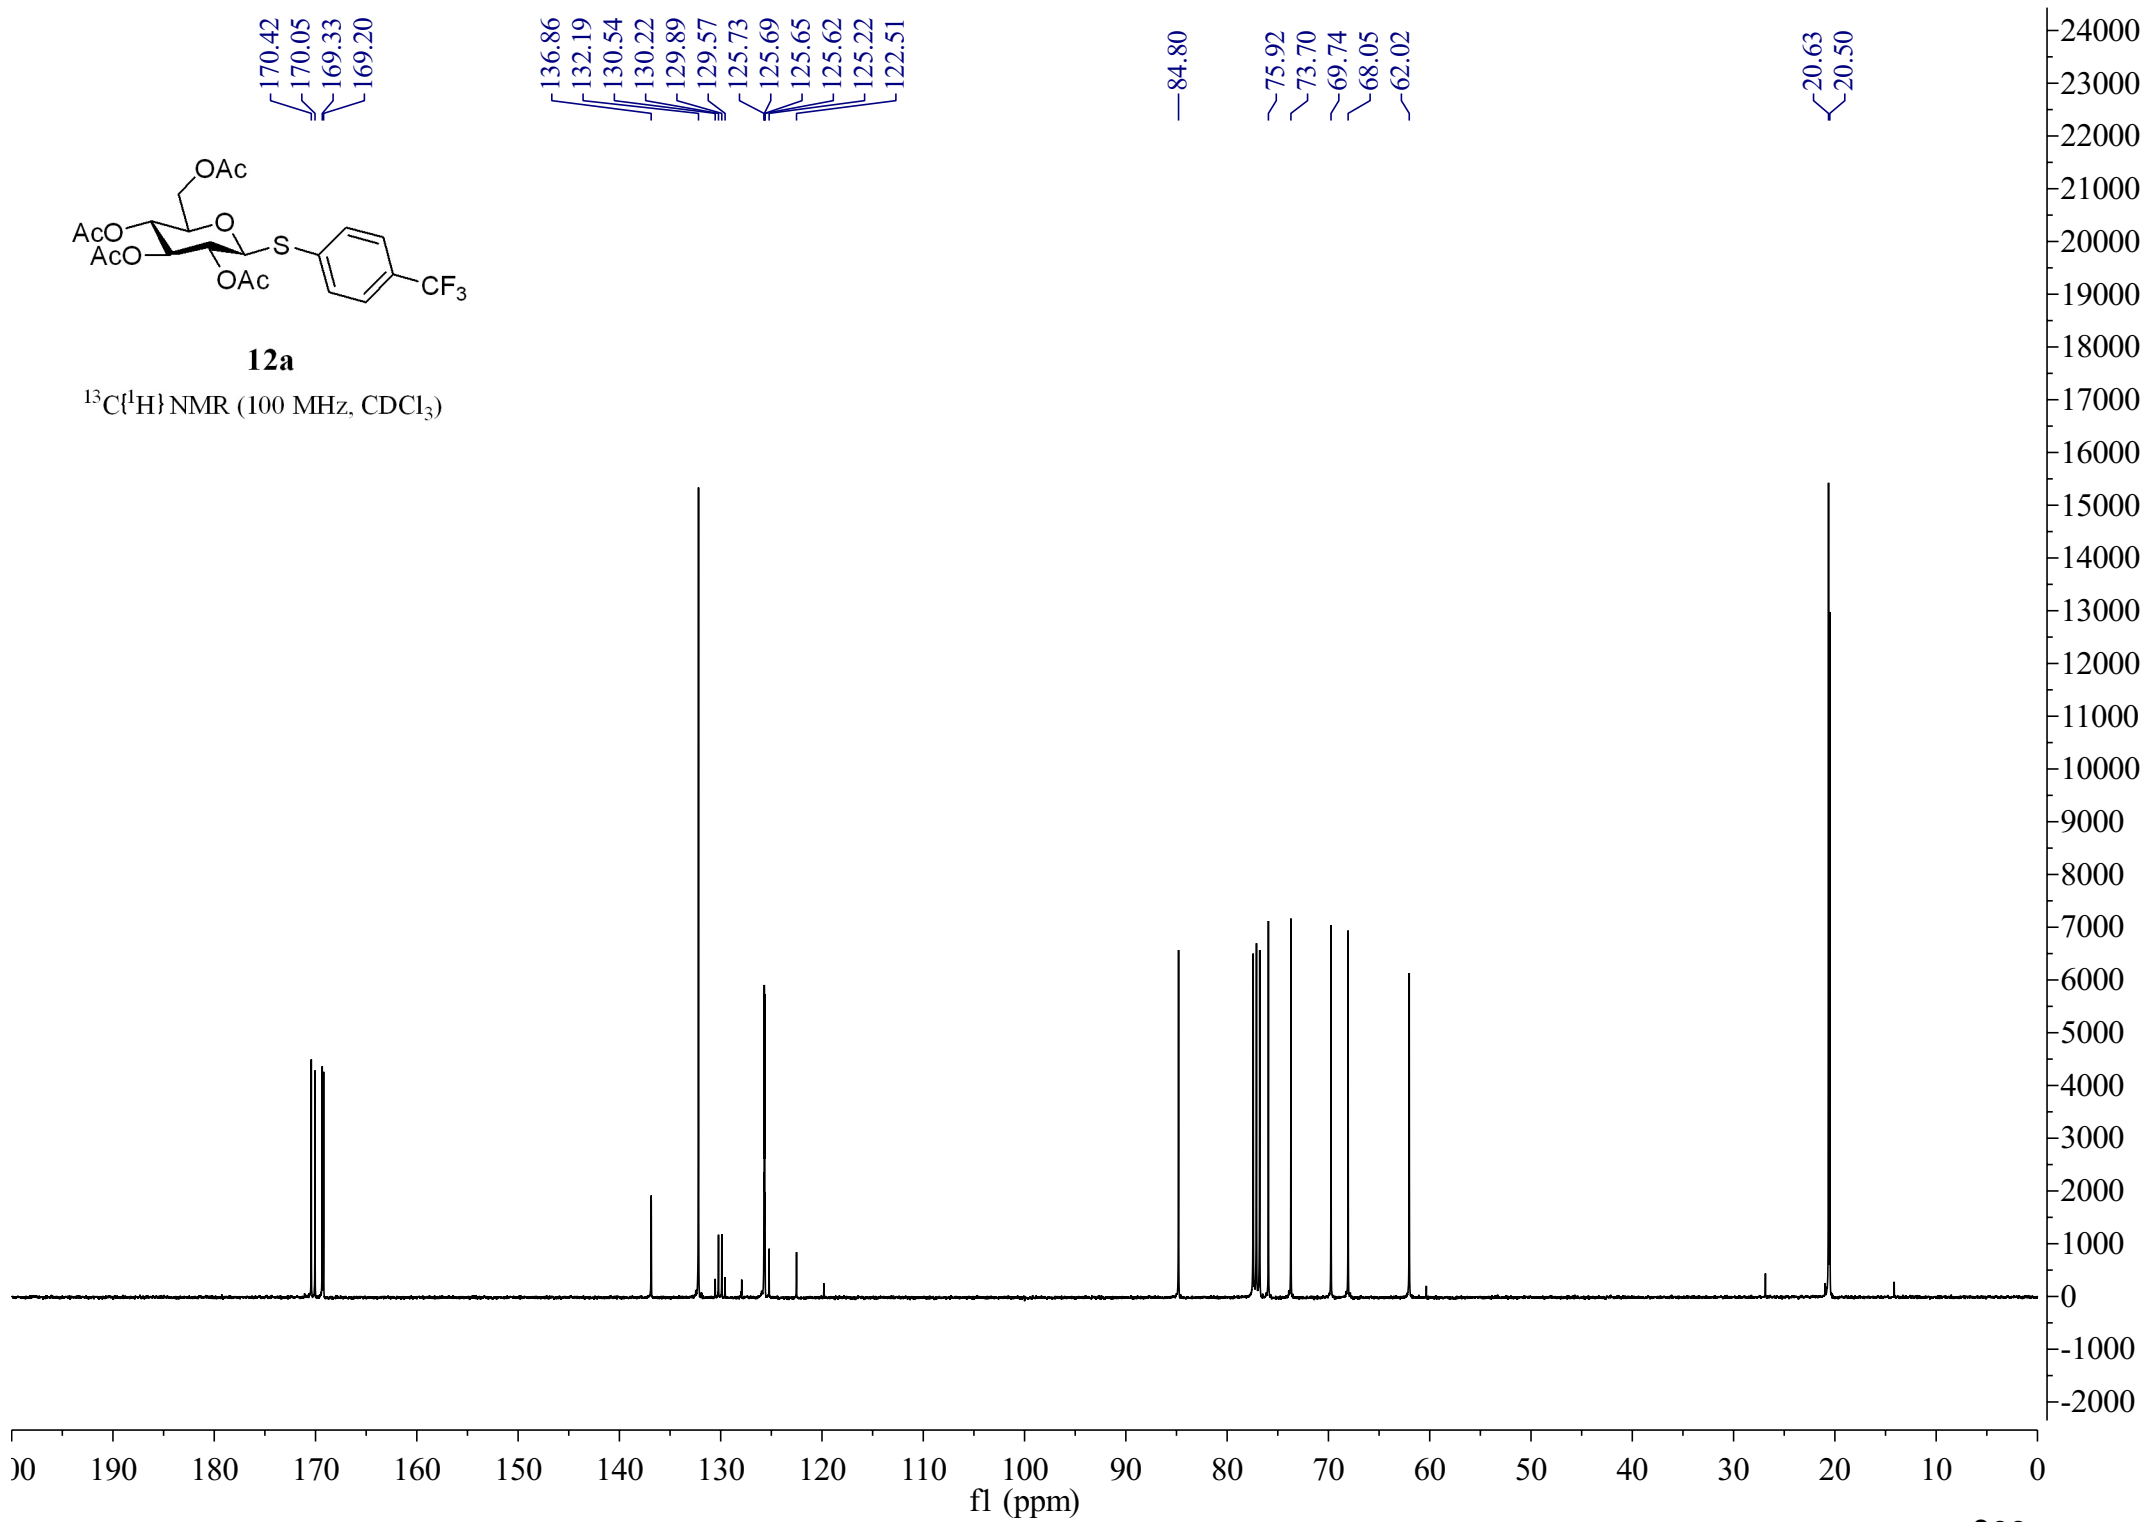

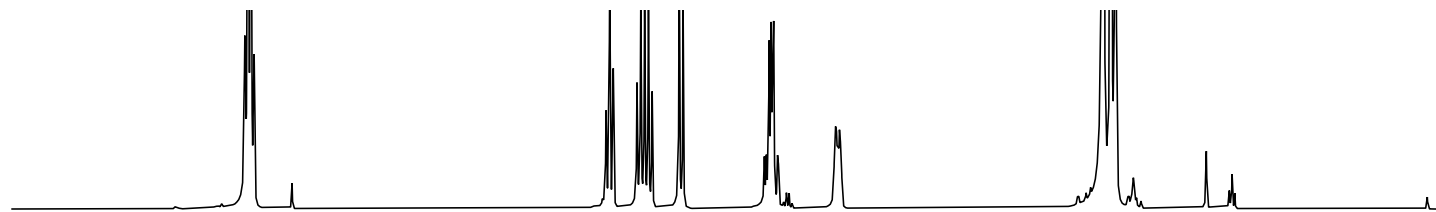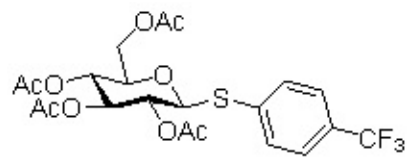

**12a**

$^1\text{H}$ - $^1\text{H}$  COSY (400 MHz,  $\text{CDCl}_3$ )

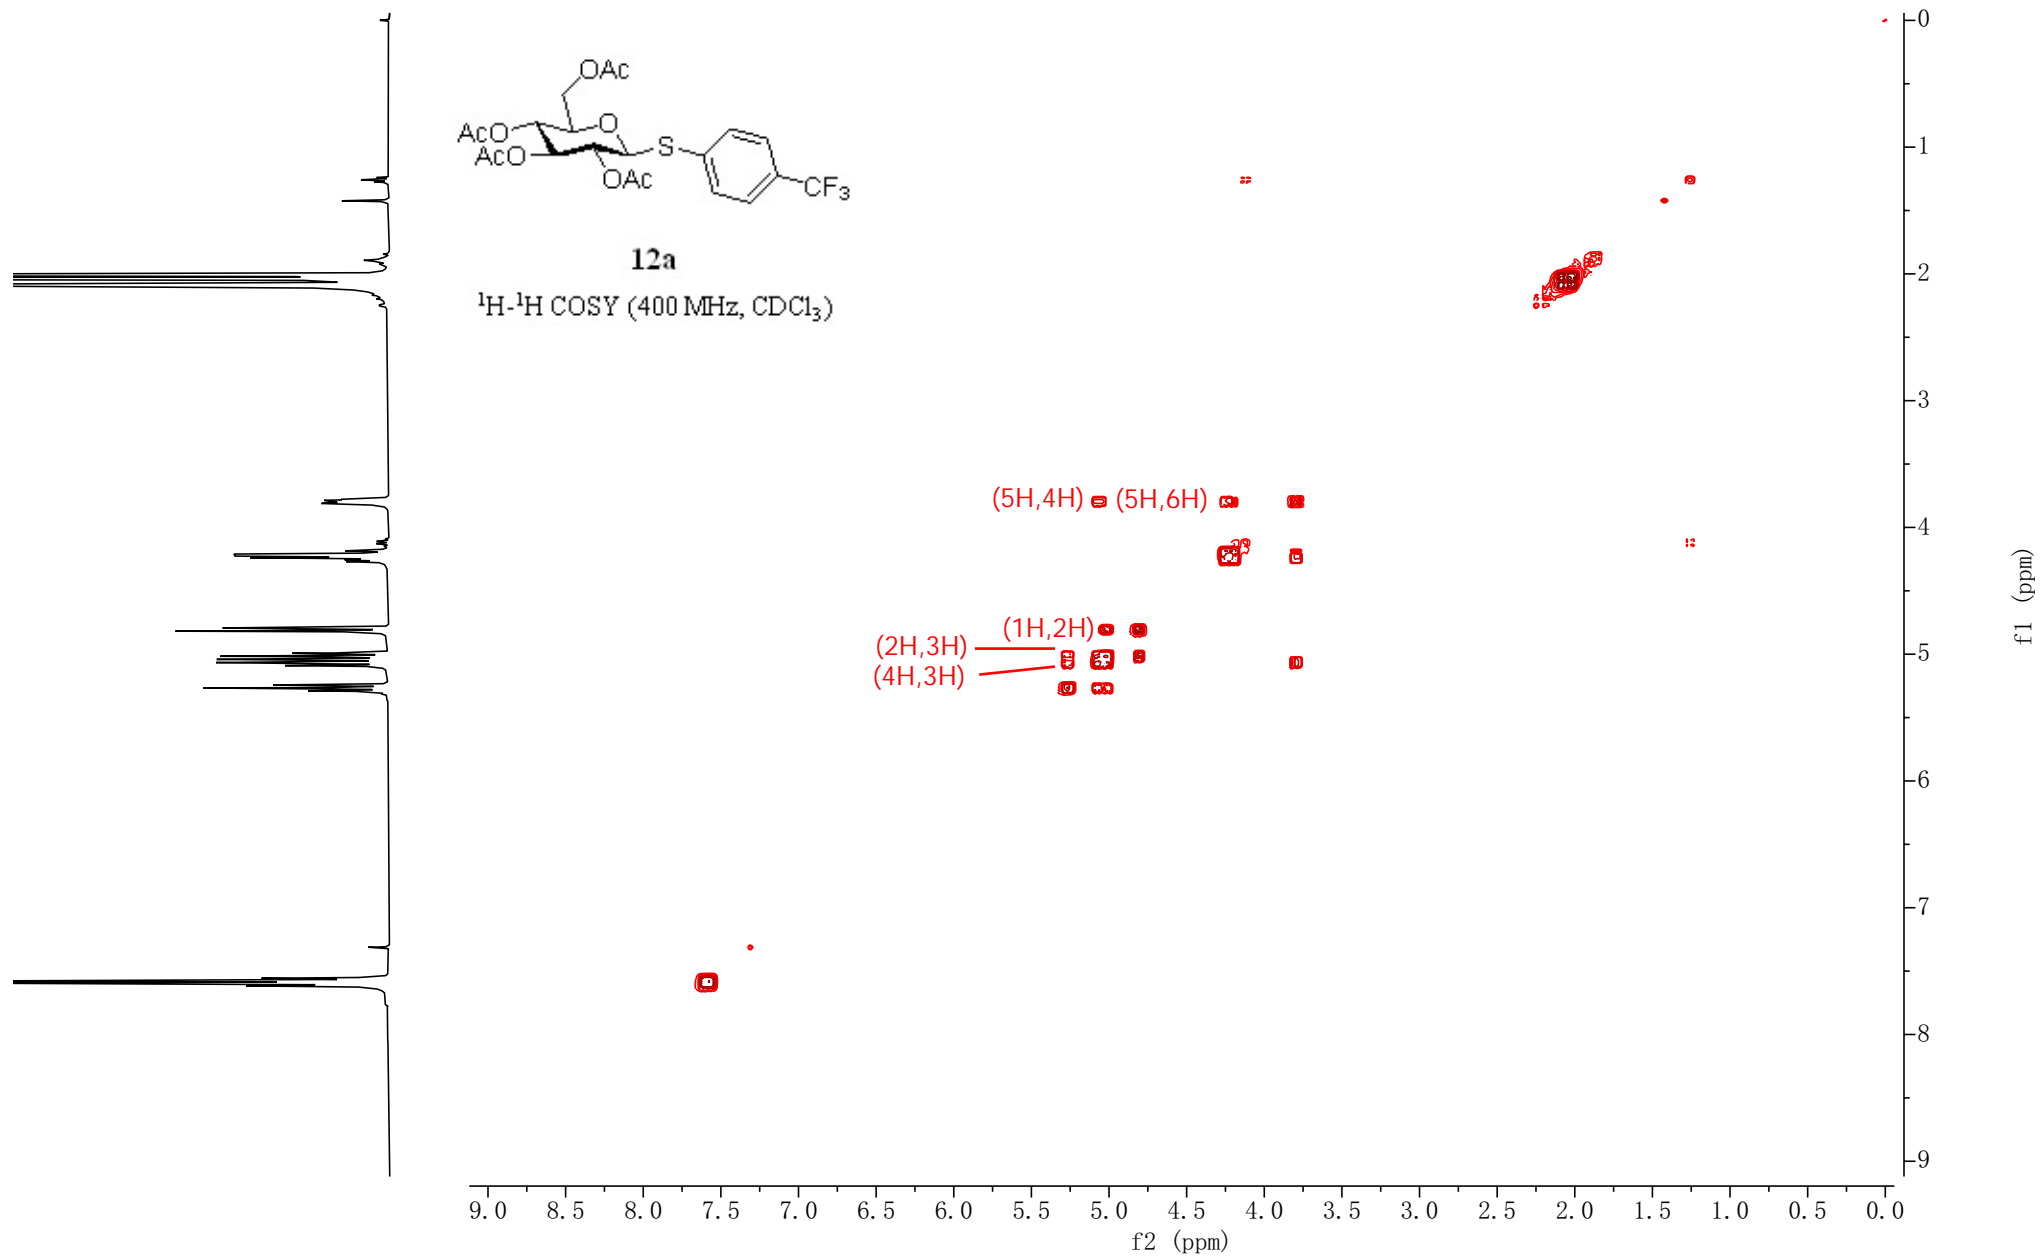

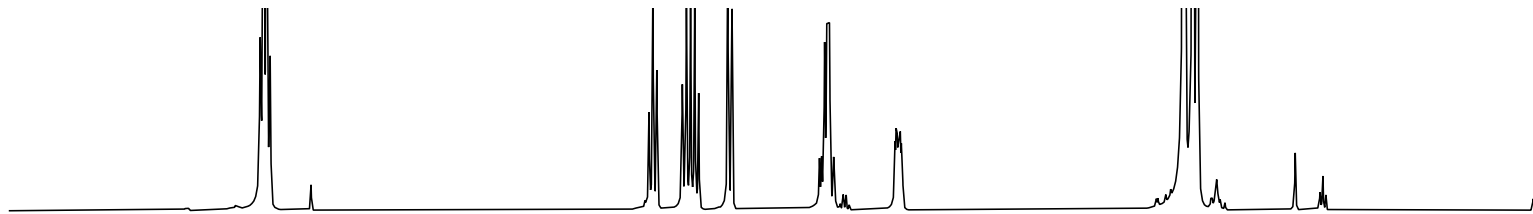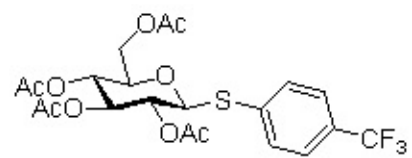

**12a**

HSQC (400 MHz, CDCl<sub>3</sub>)

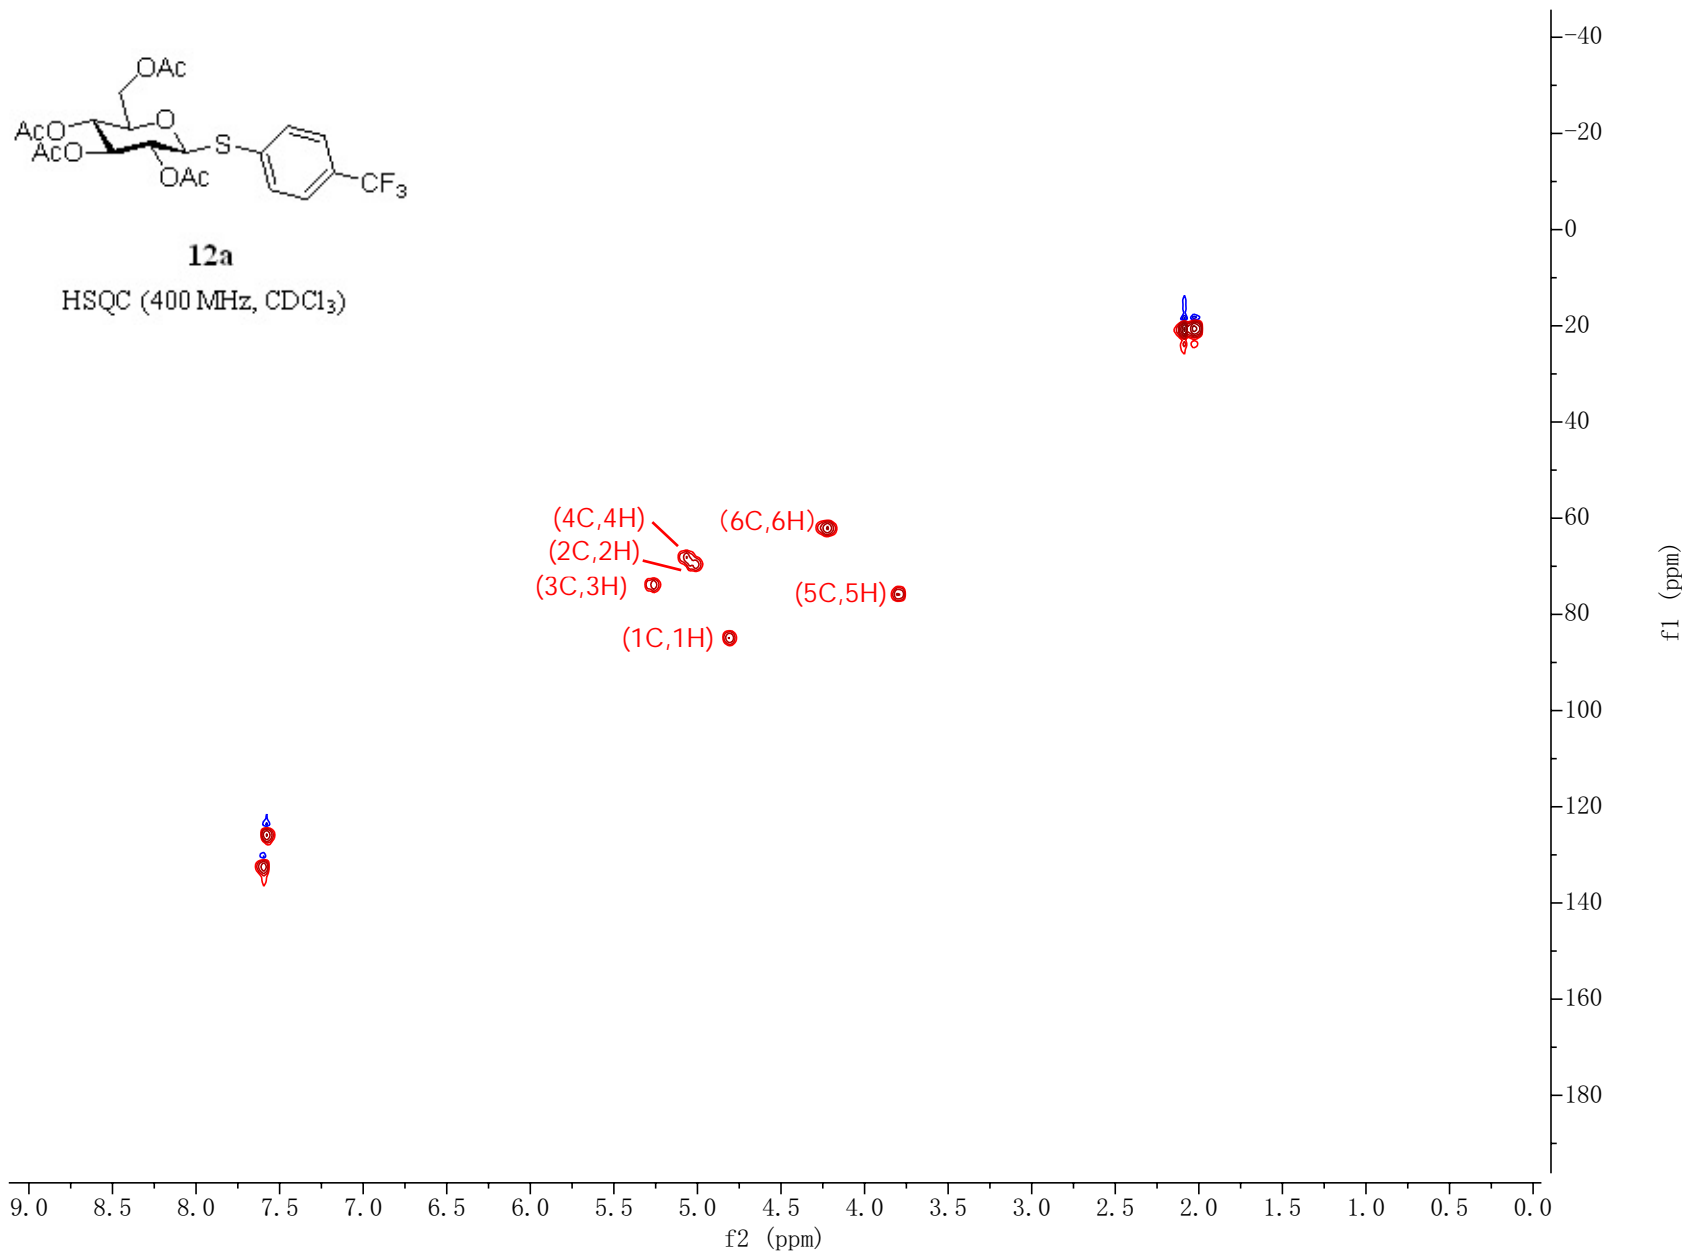

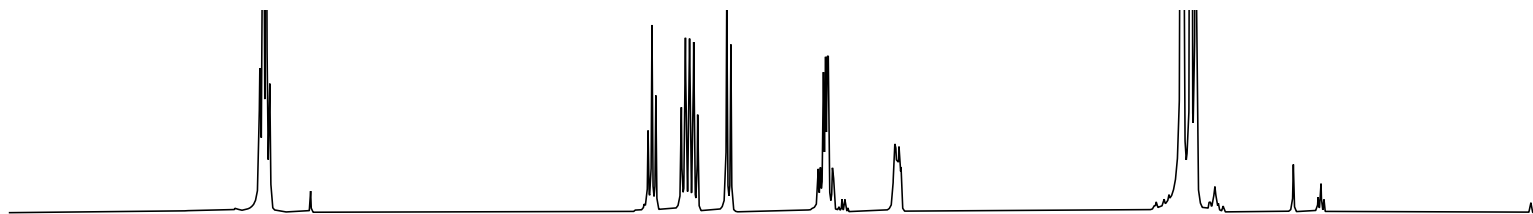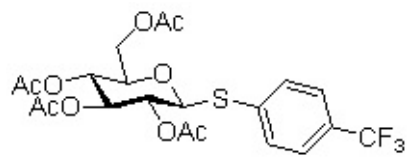

**12a**

HMBC (400 MHz, CDCl<sub>3</sub>)

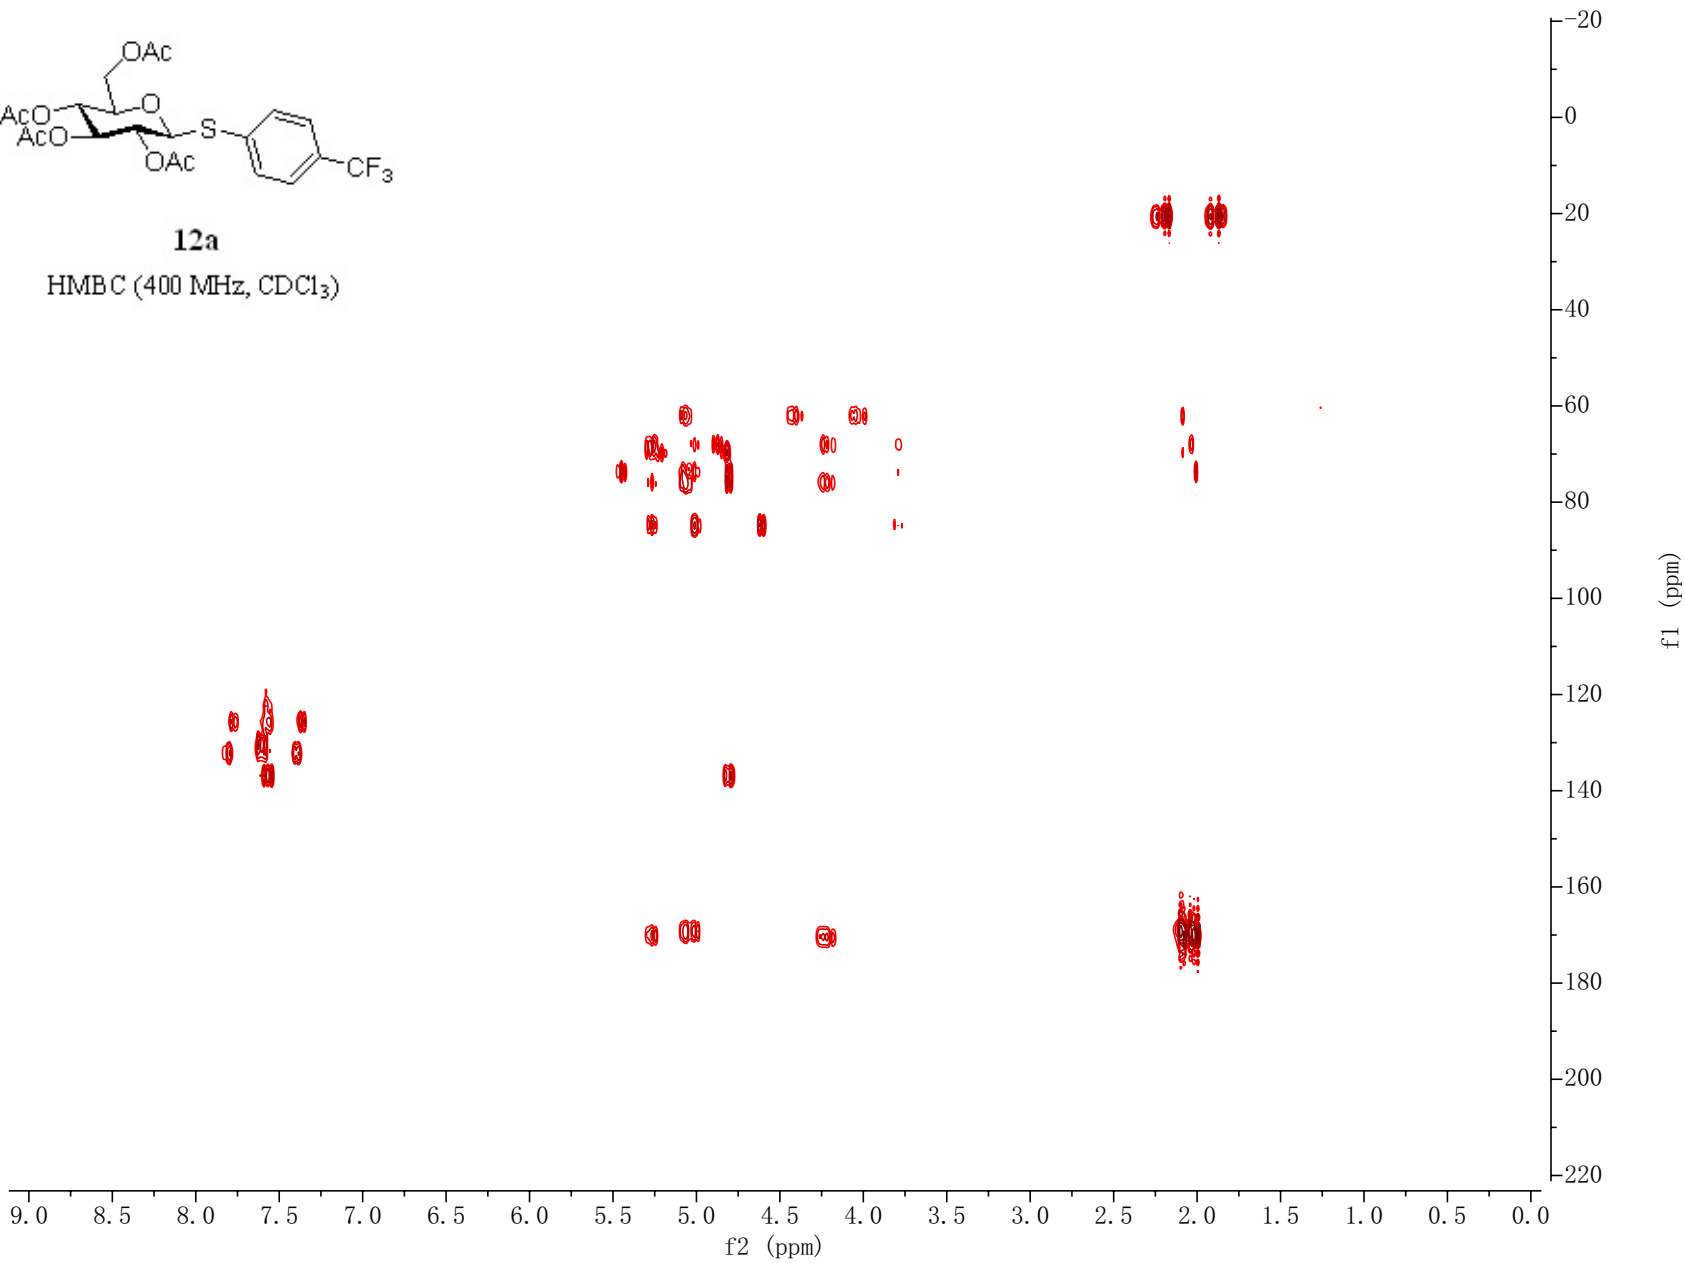



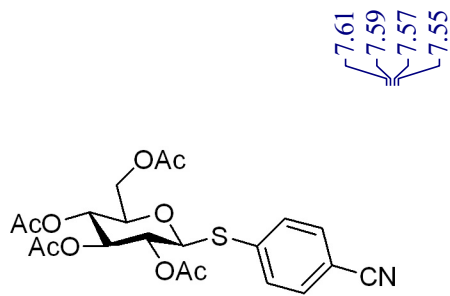

**12b**

$^1\text{H}$  NMR (400 MHz,  $\text{CDCl}_3$ )

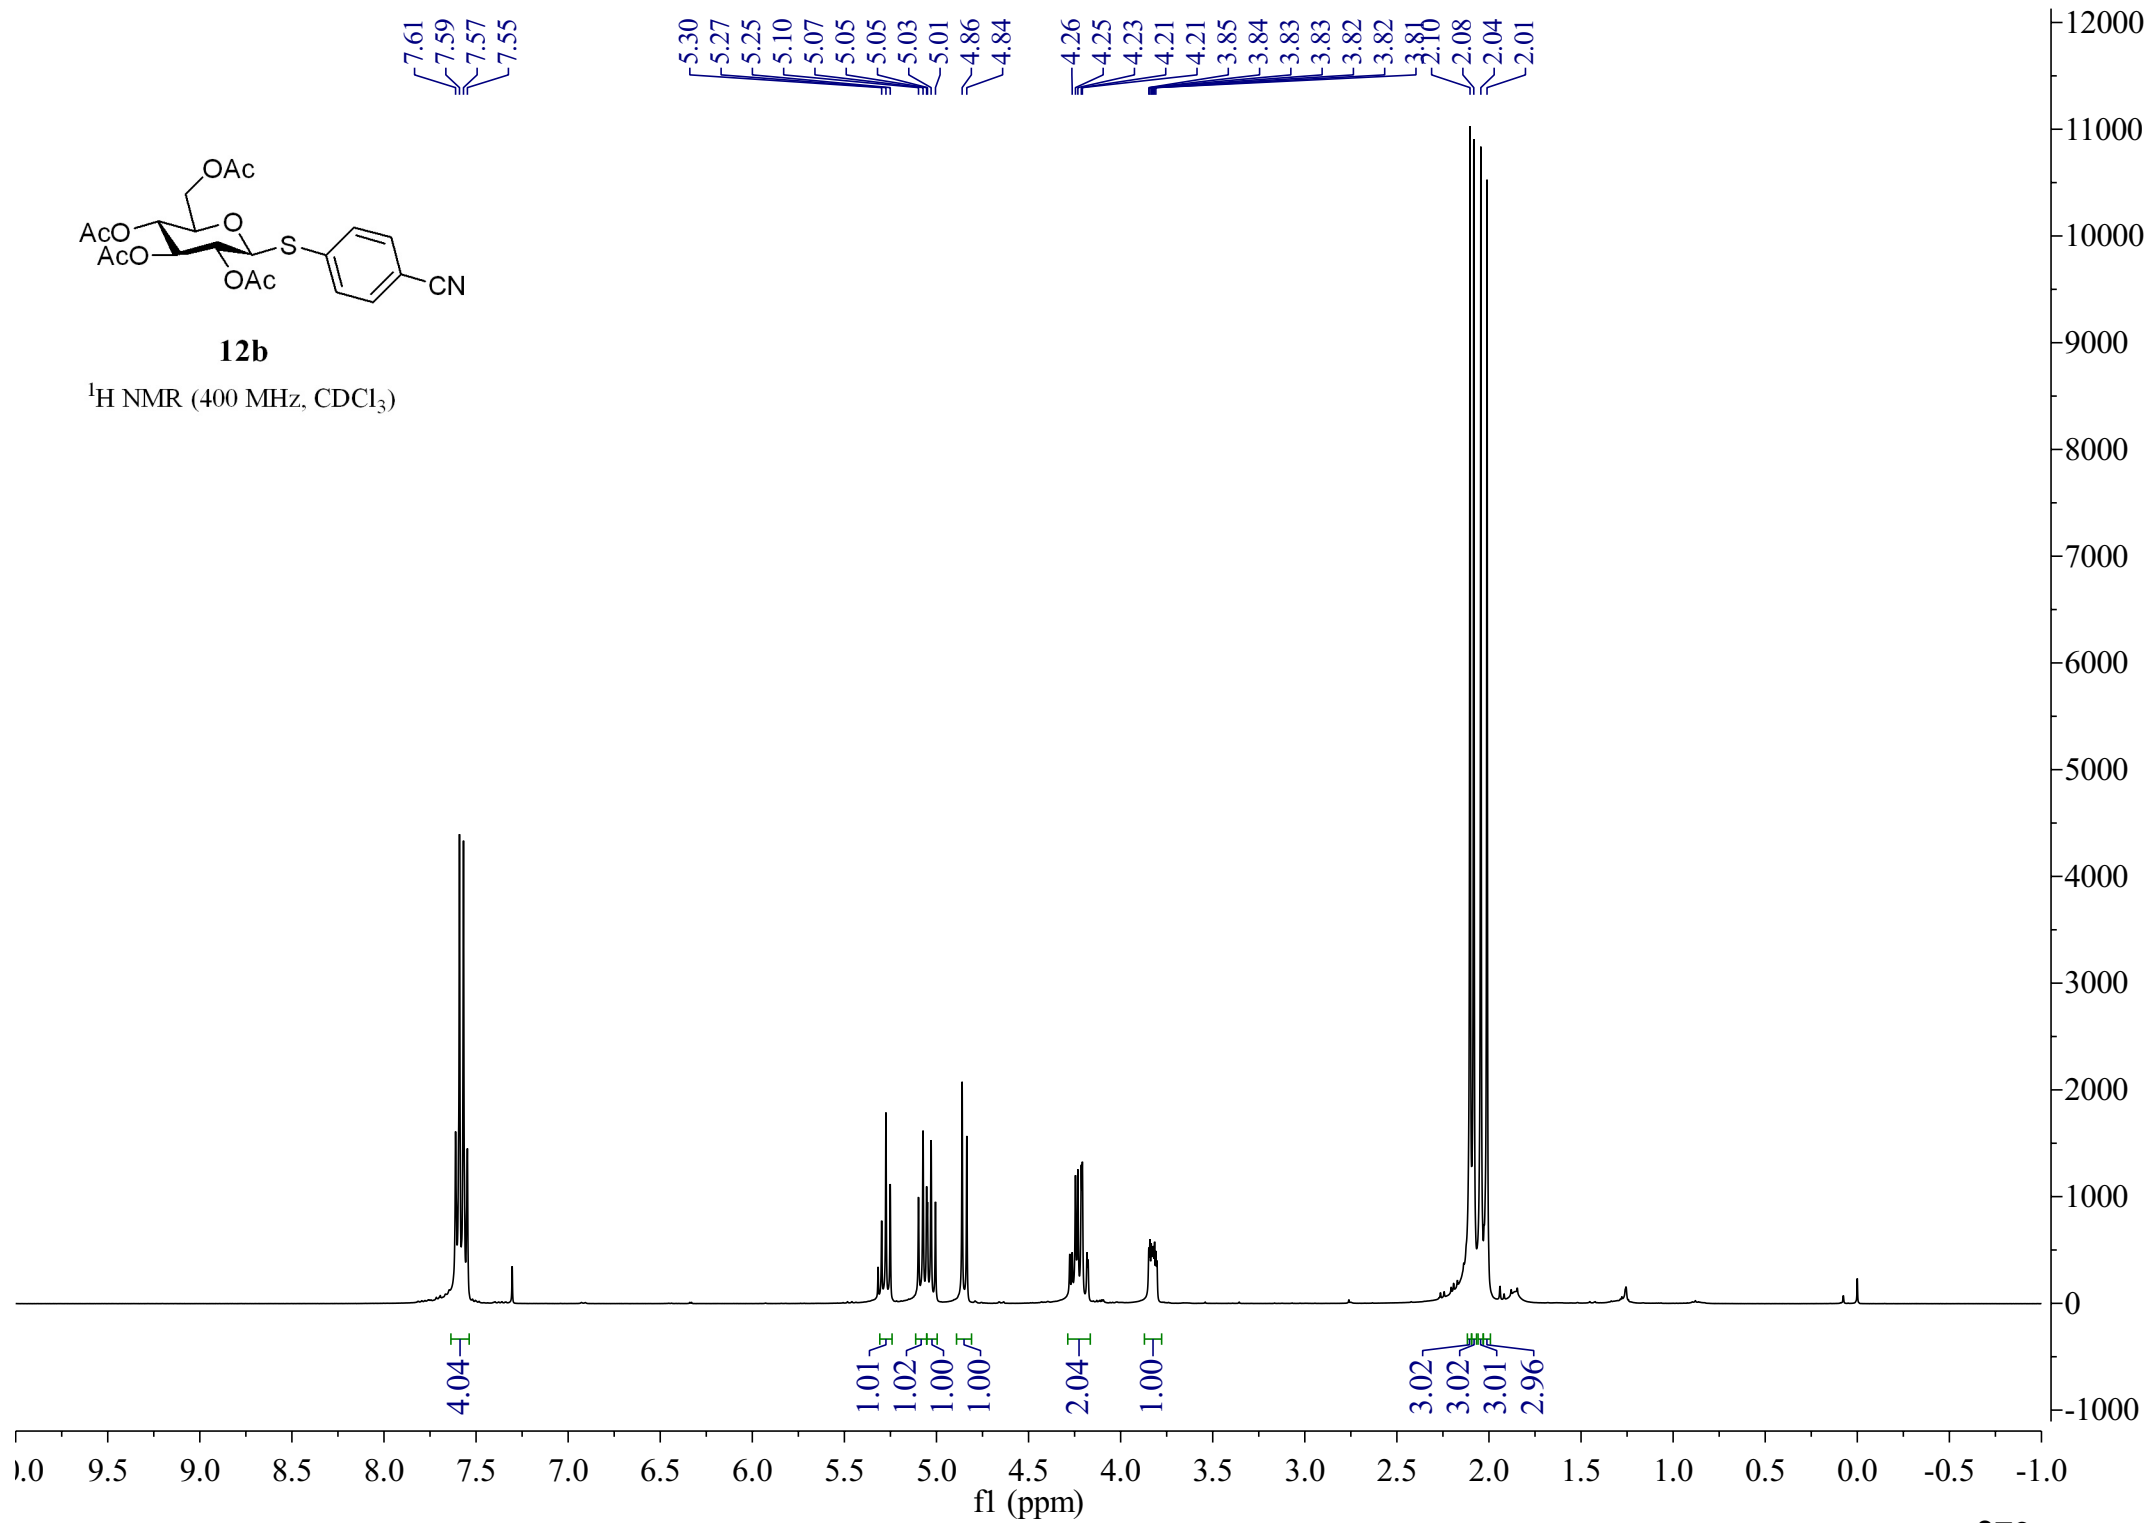

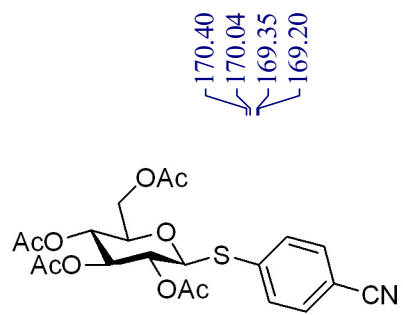

**12b**

$^{13}\text{C}\{^1\text{H}\}$  NMR (100 MHz,  $\text{CDCl}_3$ )

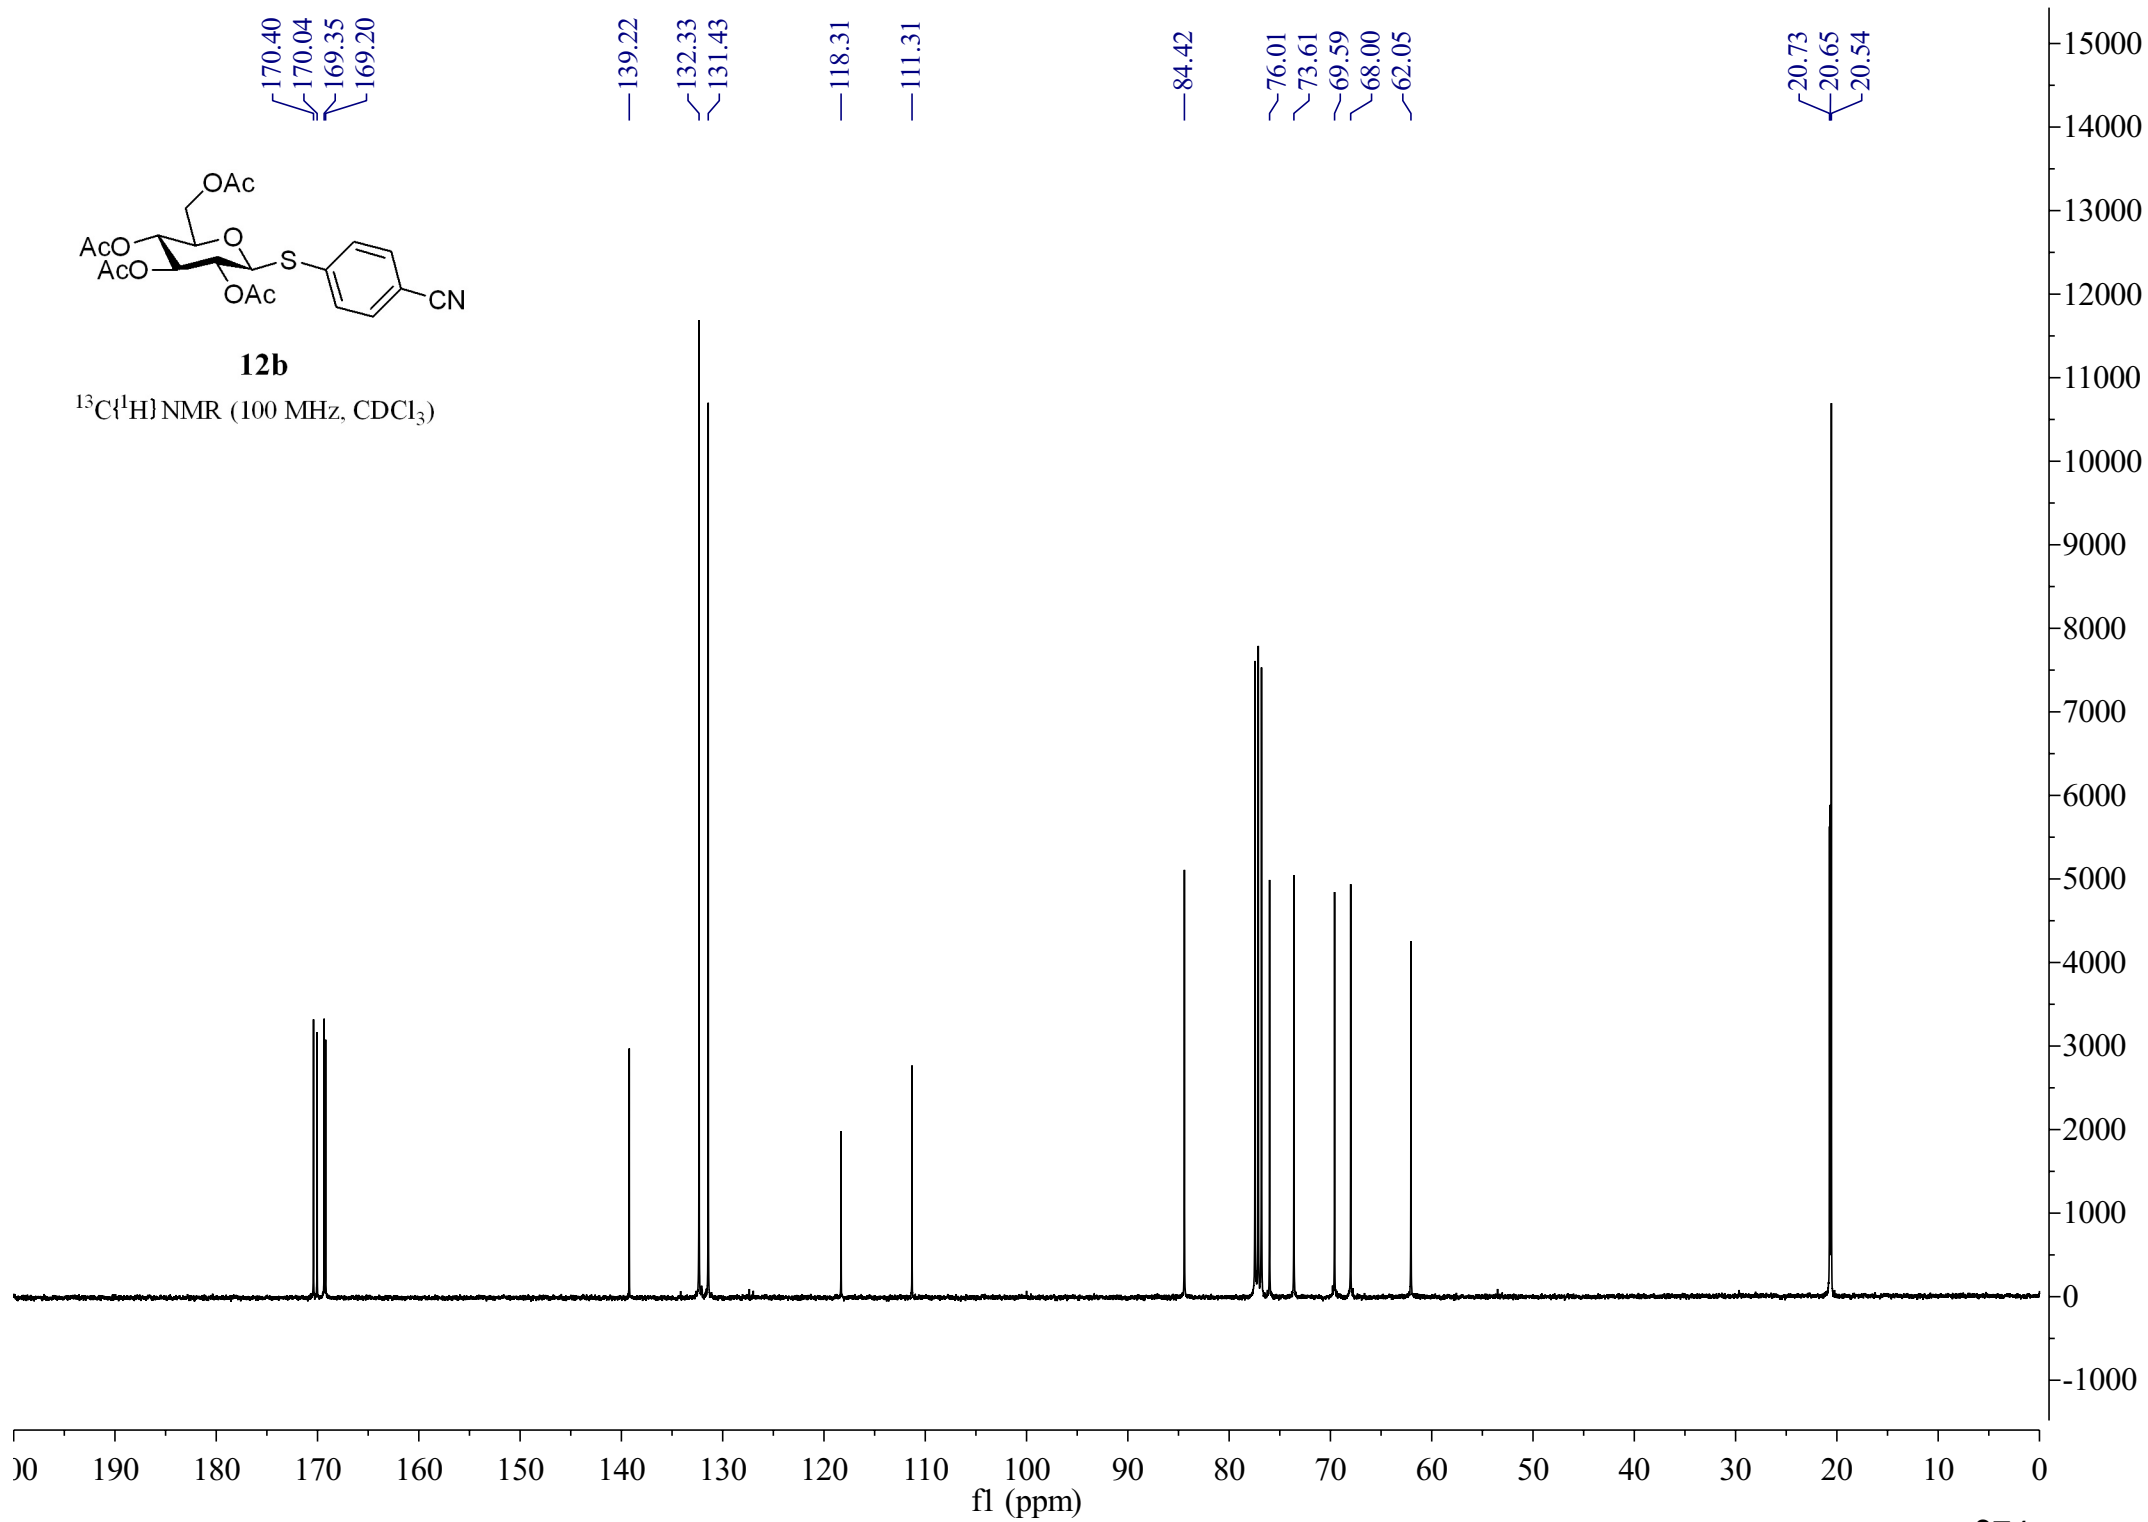

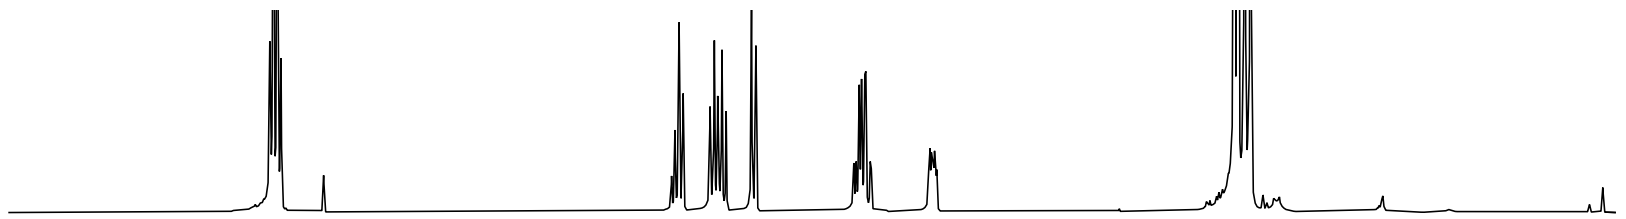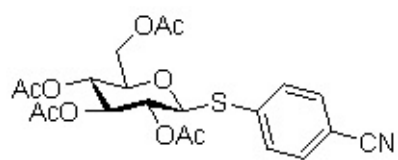

**12b**

$^1\text{H}$ - $^1\text{H}$  COSY (400 MHz,  $\text{CDCl}_3$ )

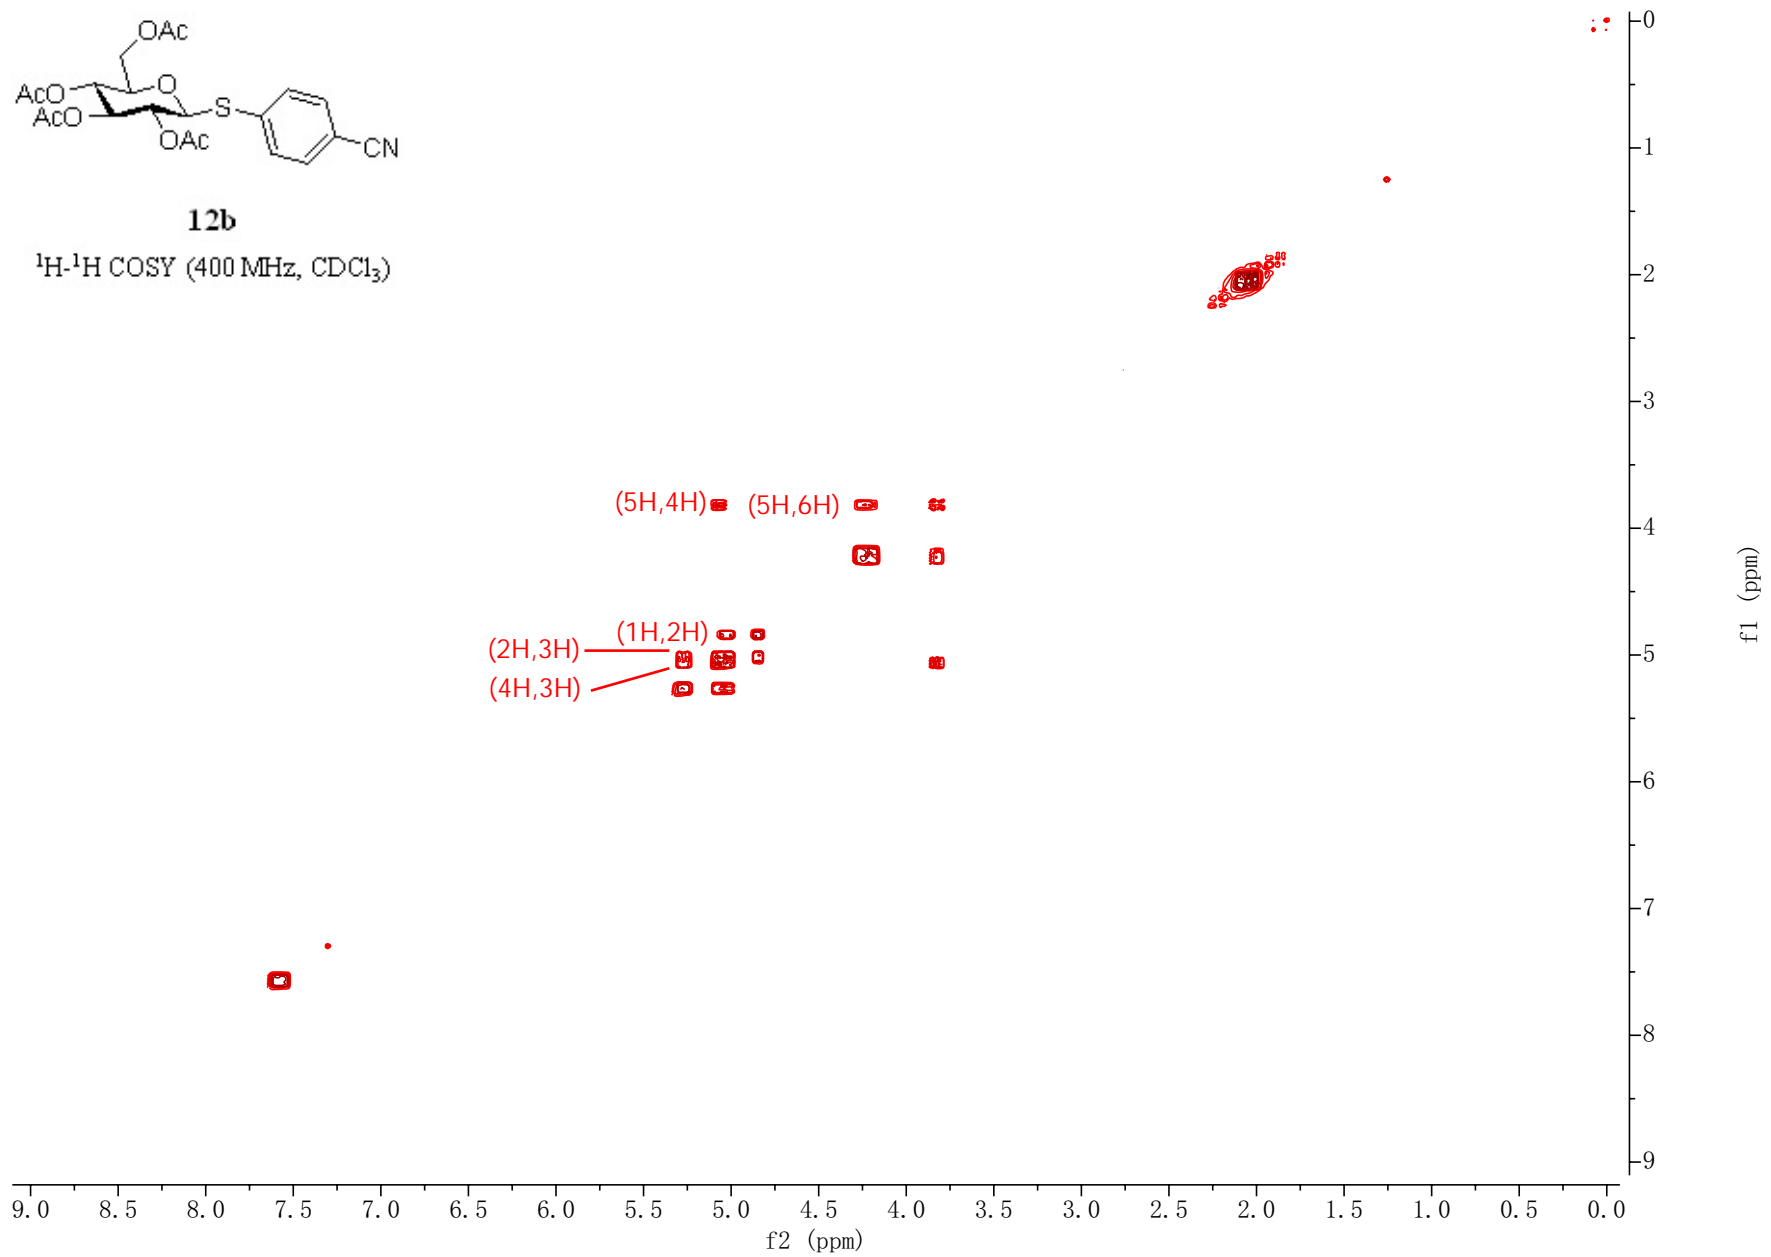

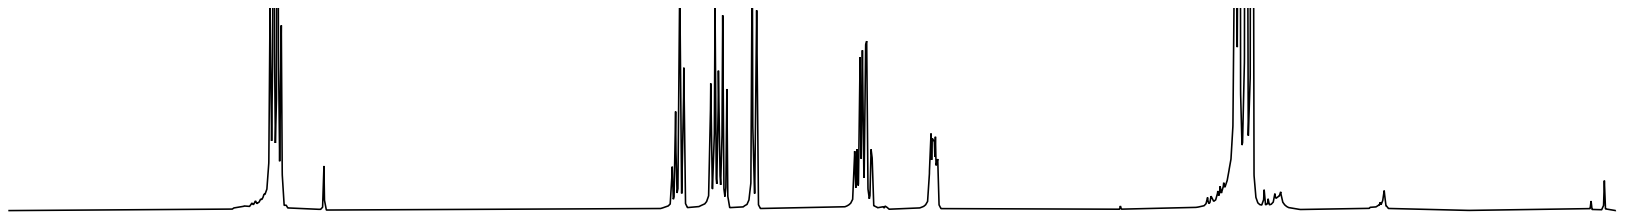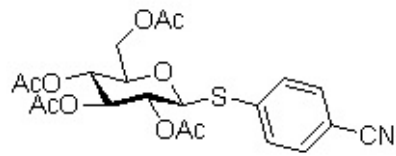

**12b**

HSQC (400MHz, CDCl<sub>3</sub>)

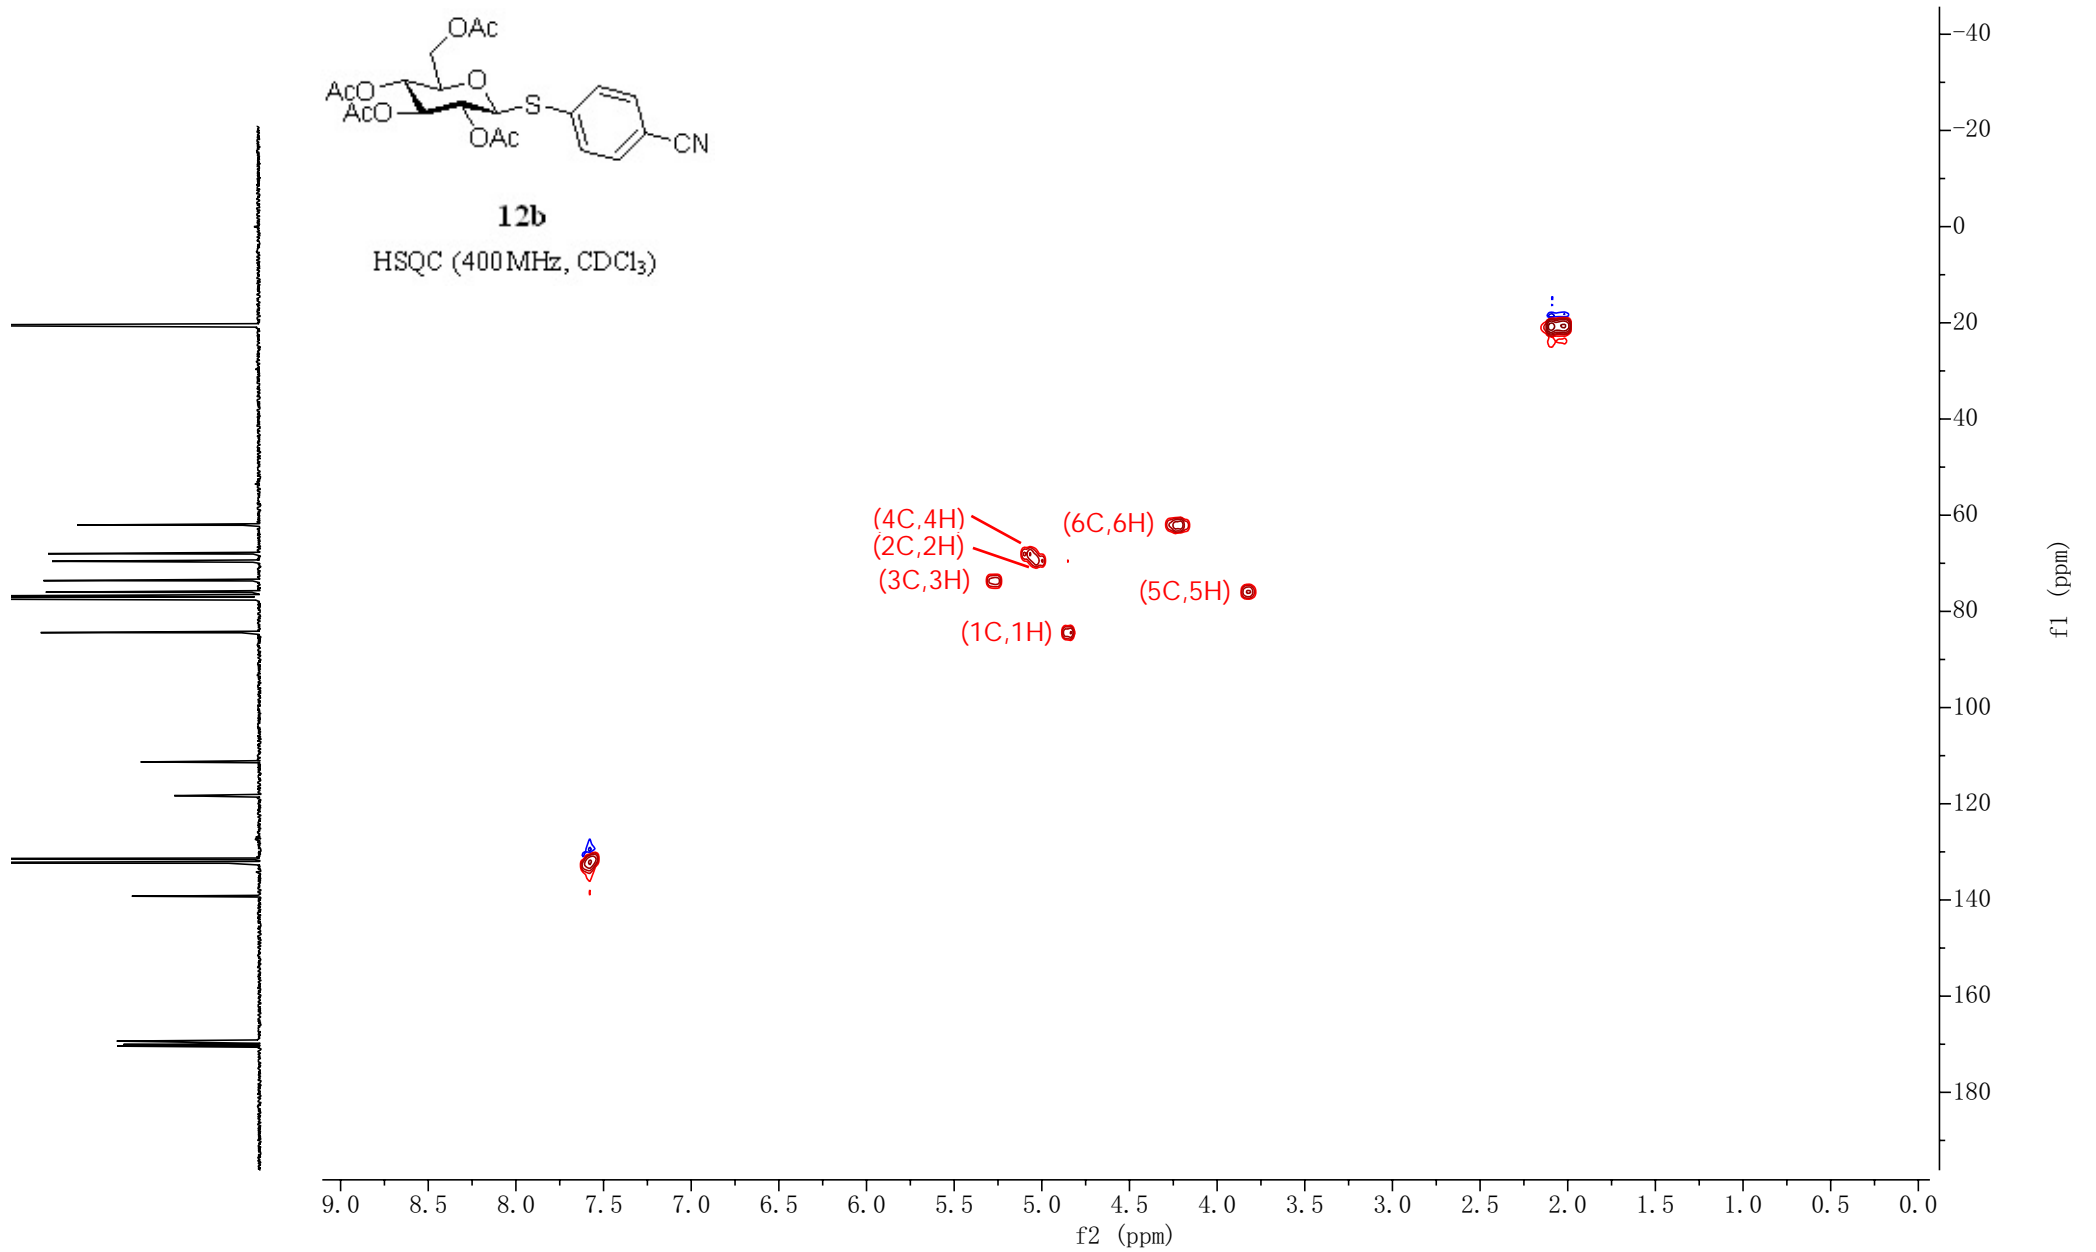

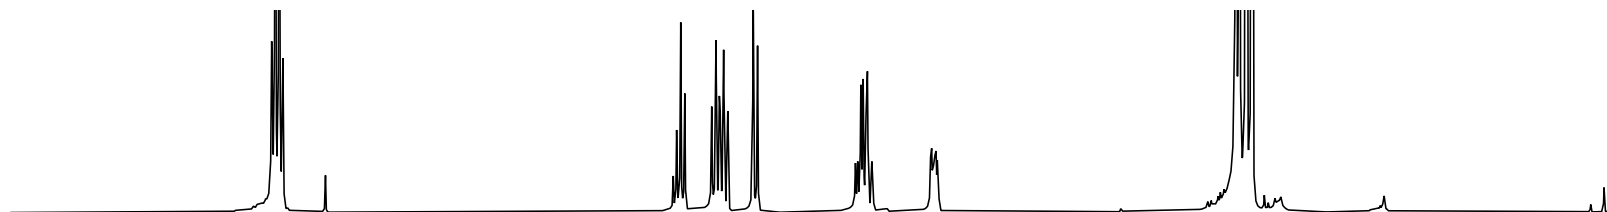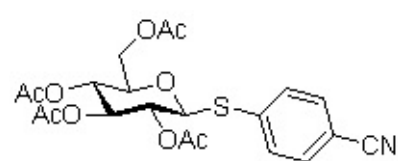

**12b**

HMBC (400 MHz, CDCl<sub>3</sub>)

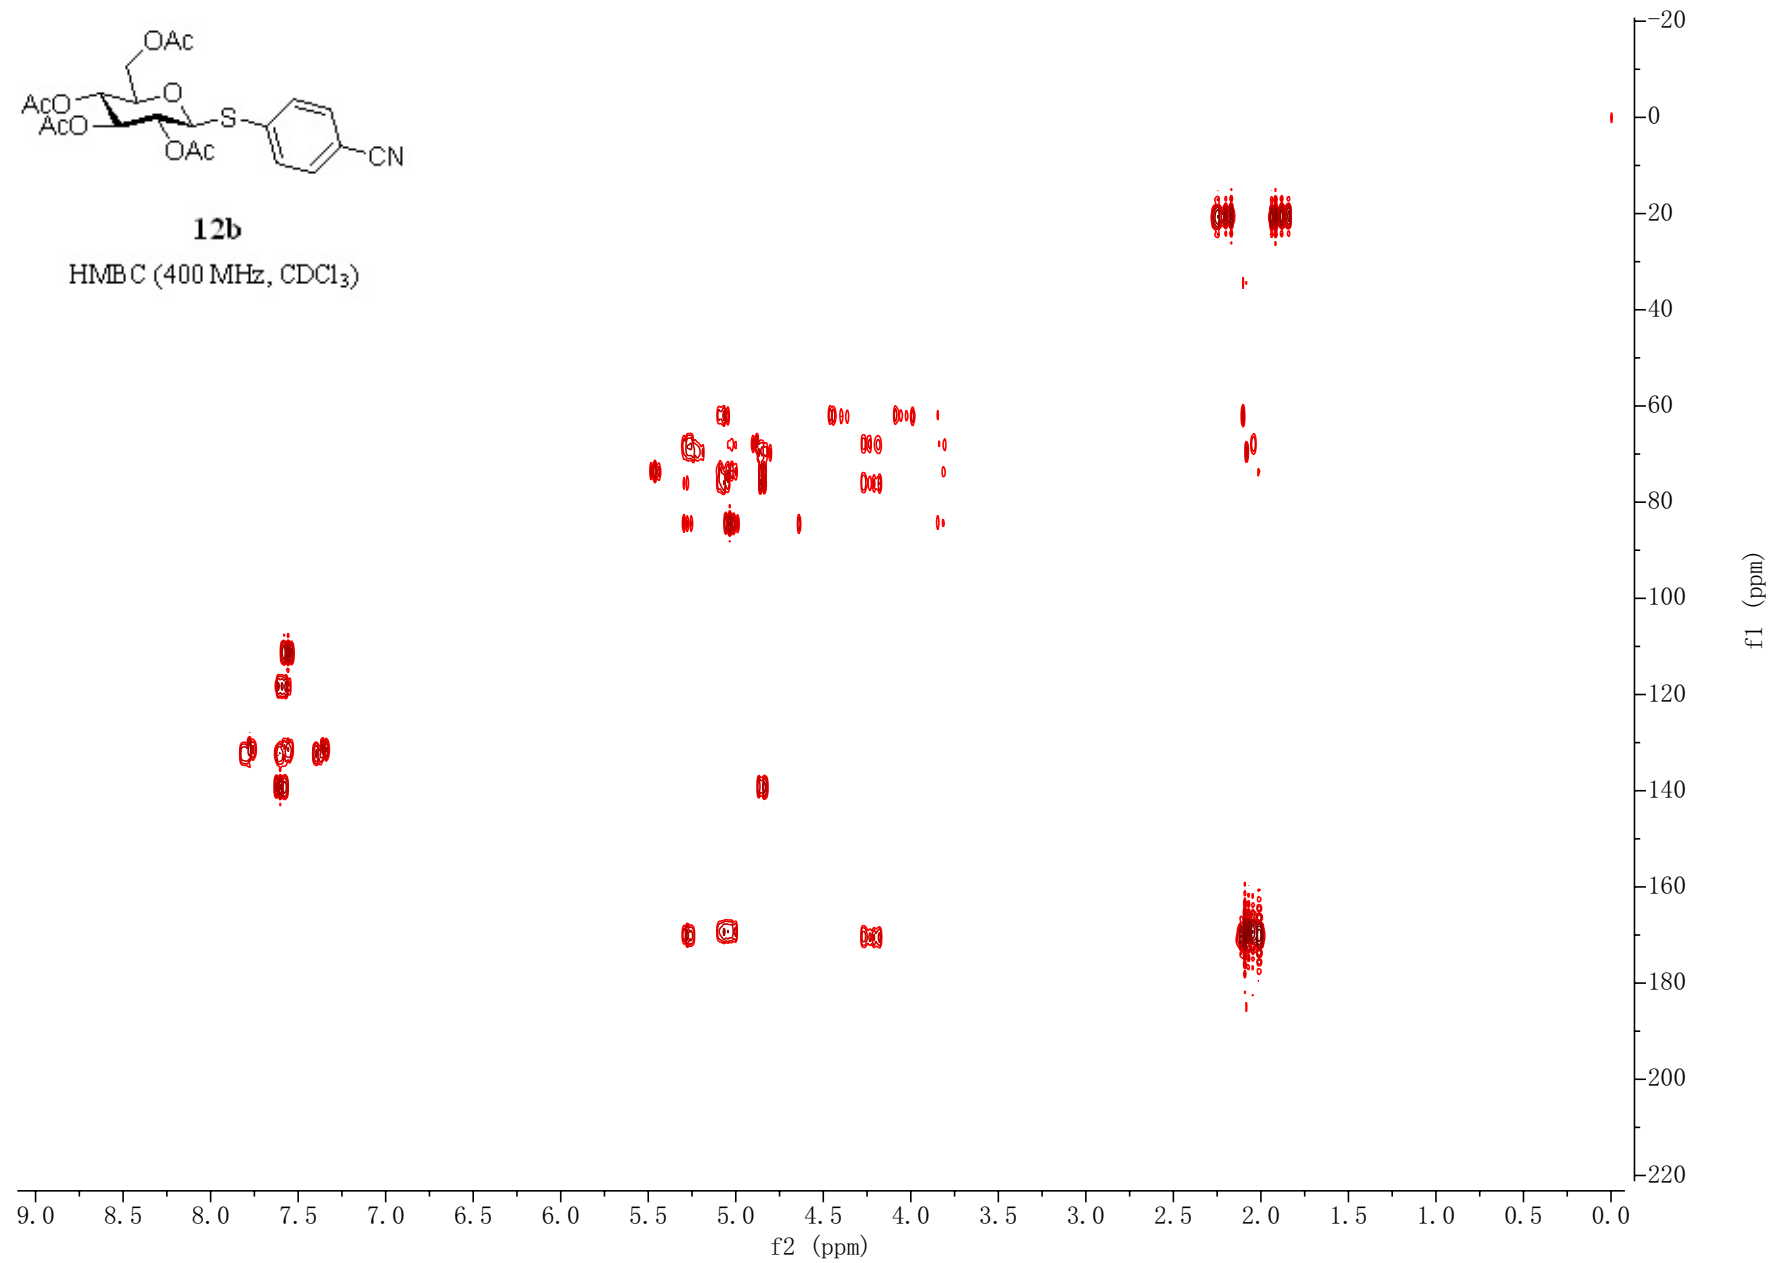

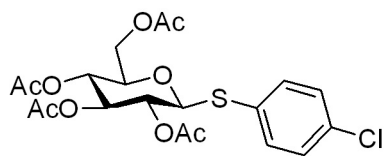

**12c**

$^1\text{H NMR}$  (400 MHz,  $\text{CDCl}_3$ )

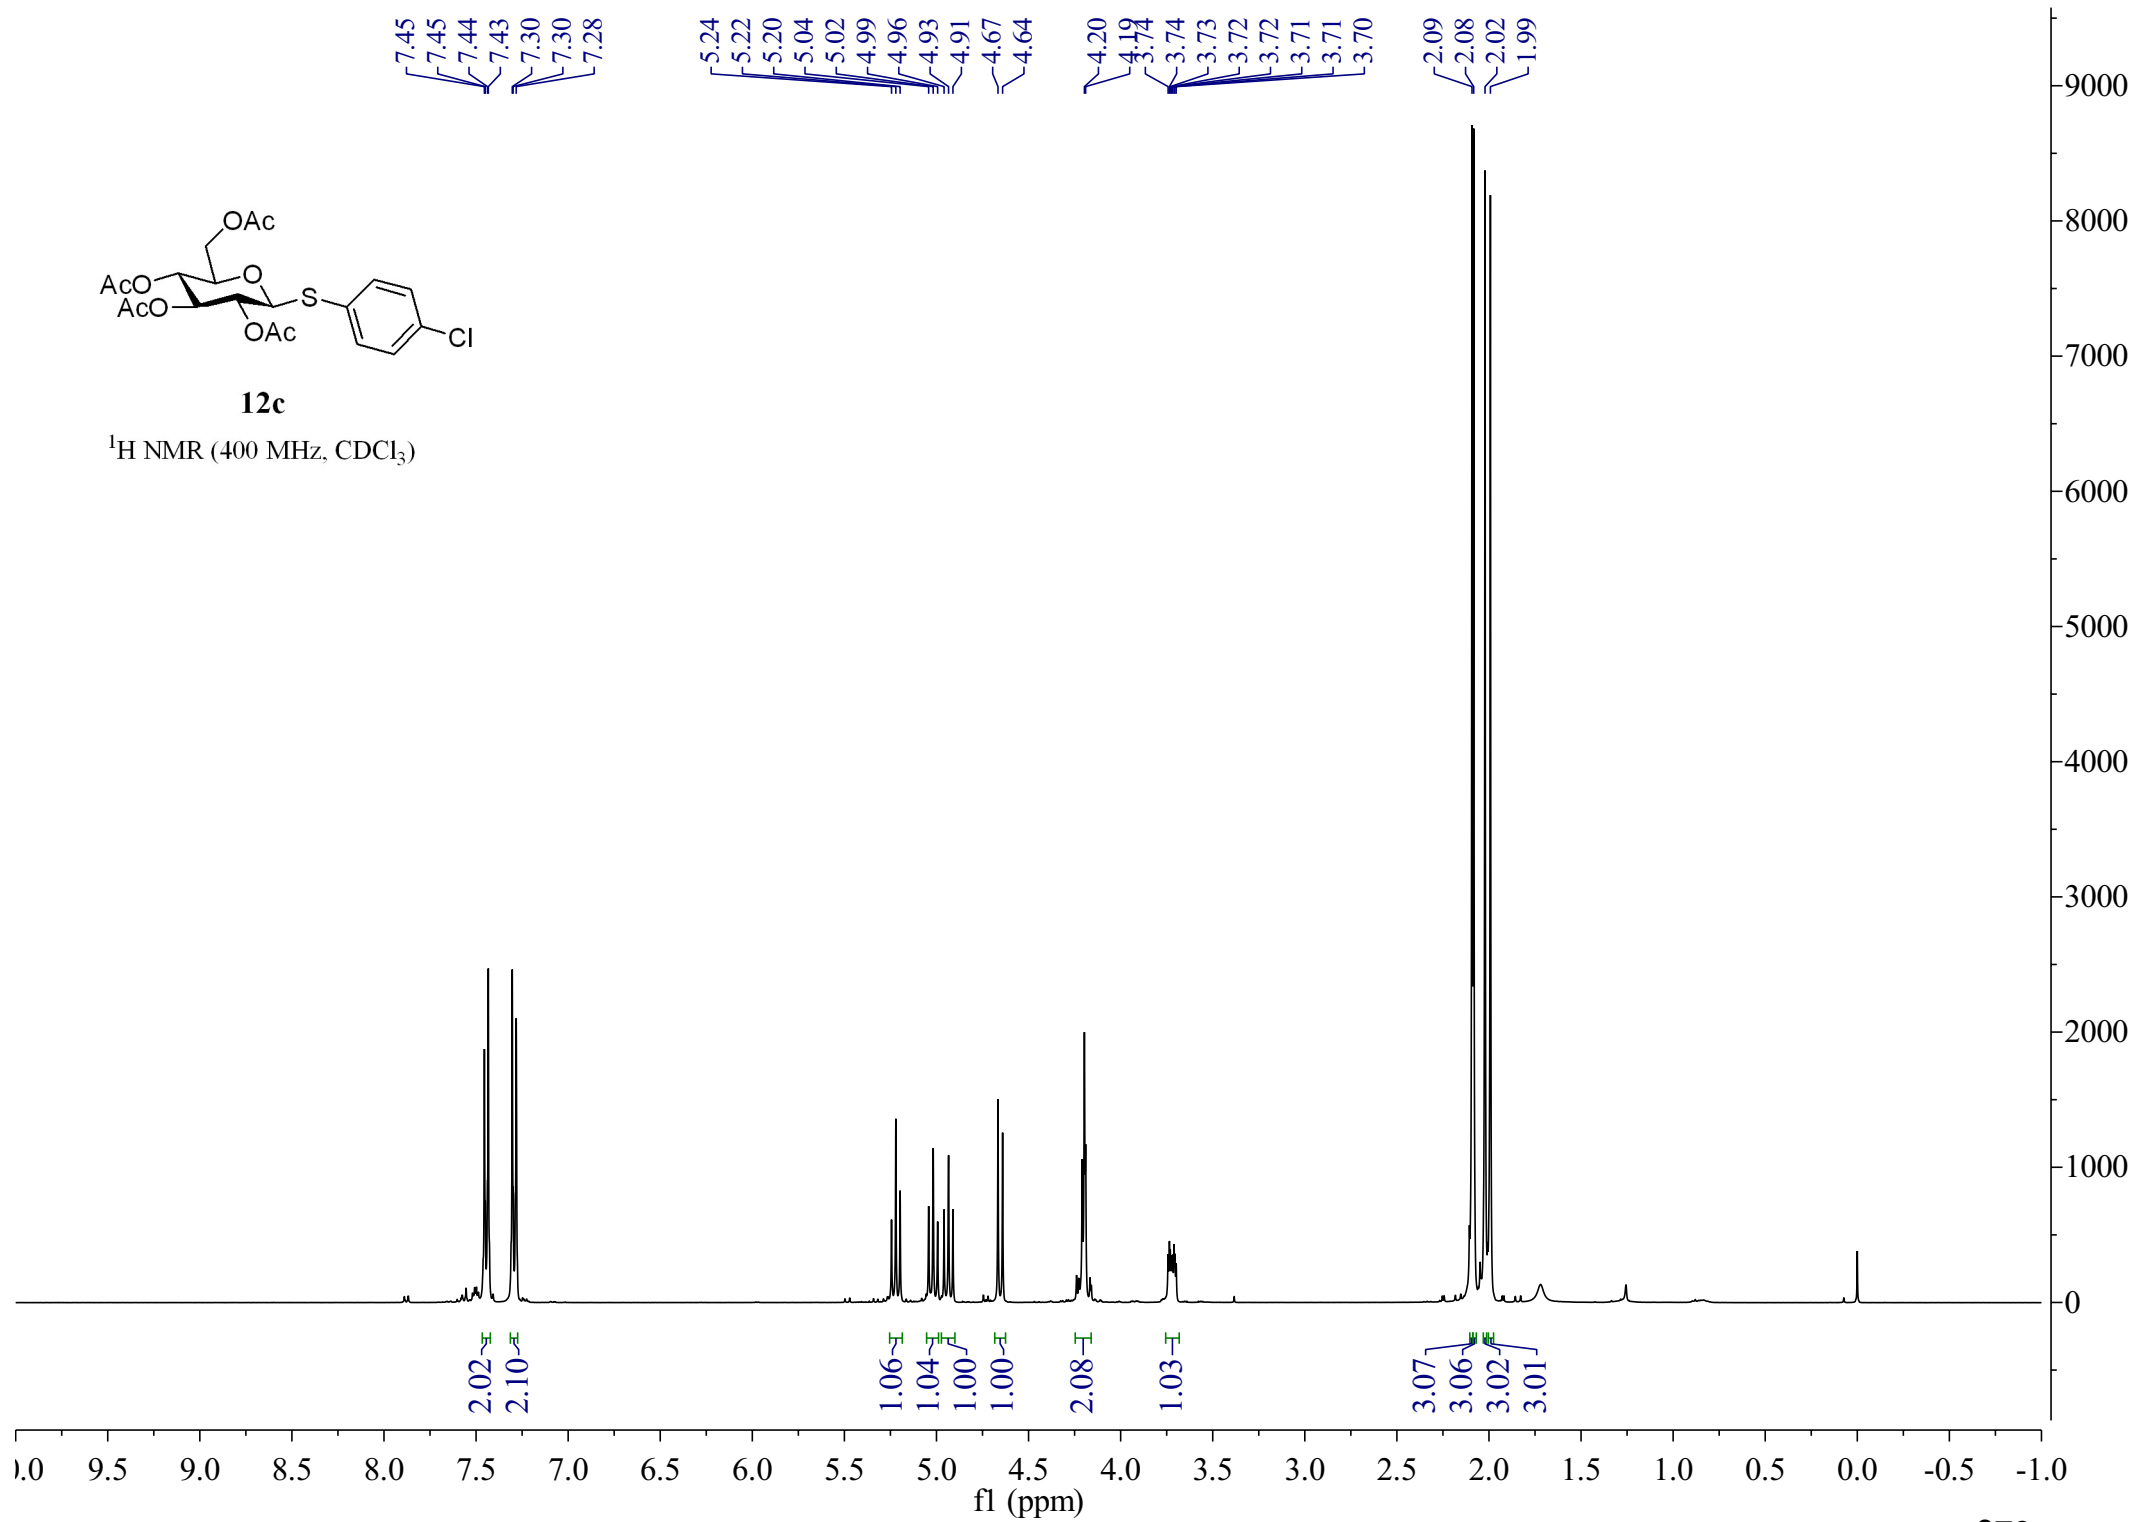

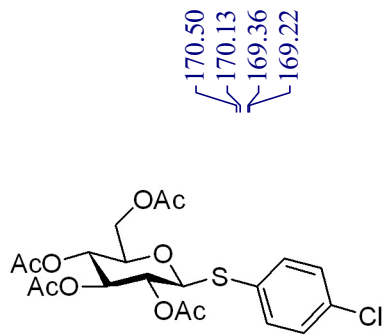

**12c**

<sup>13</sup>C{<sup>1</sup>H} NMR (100 MHz, CDCl<sub>3</sub>)

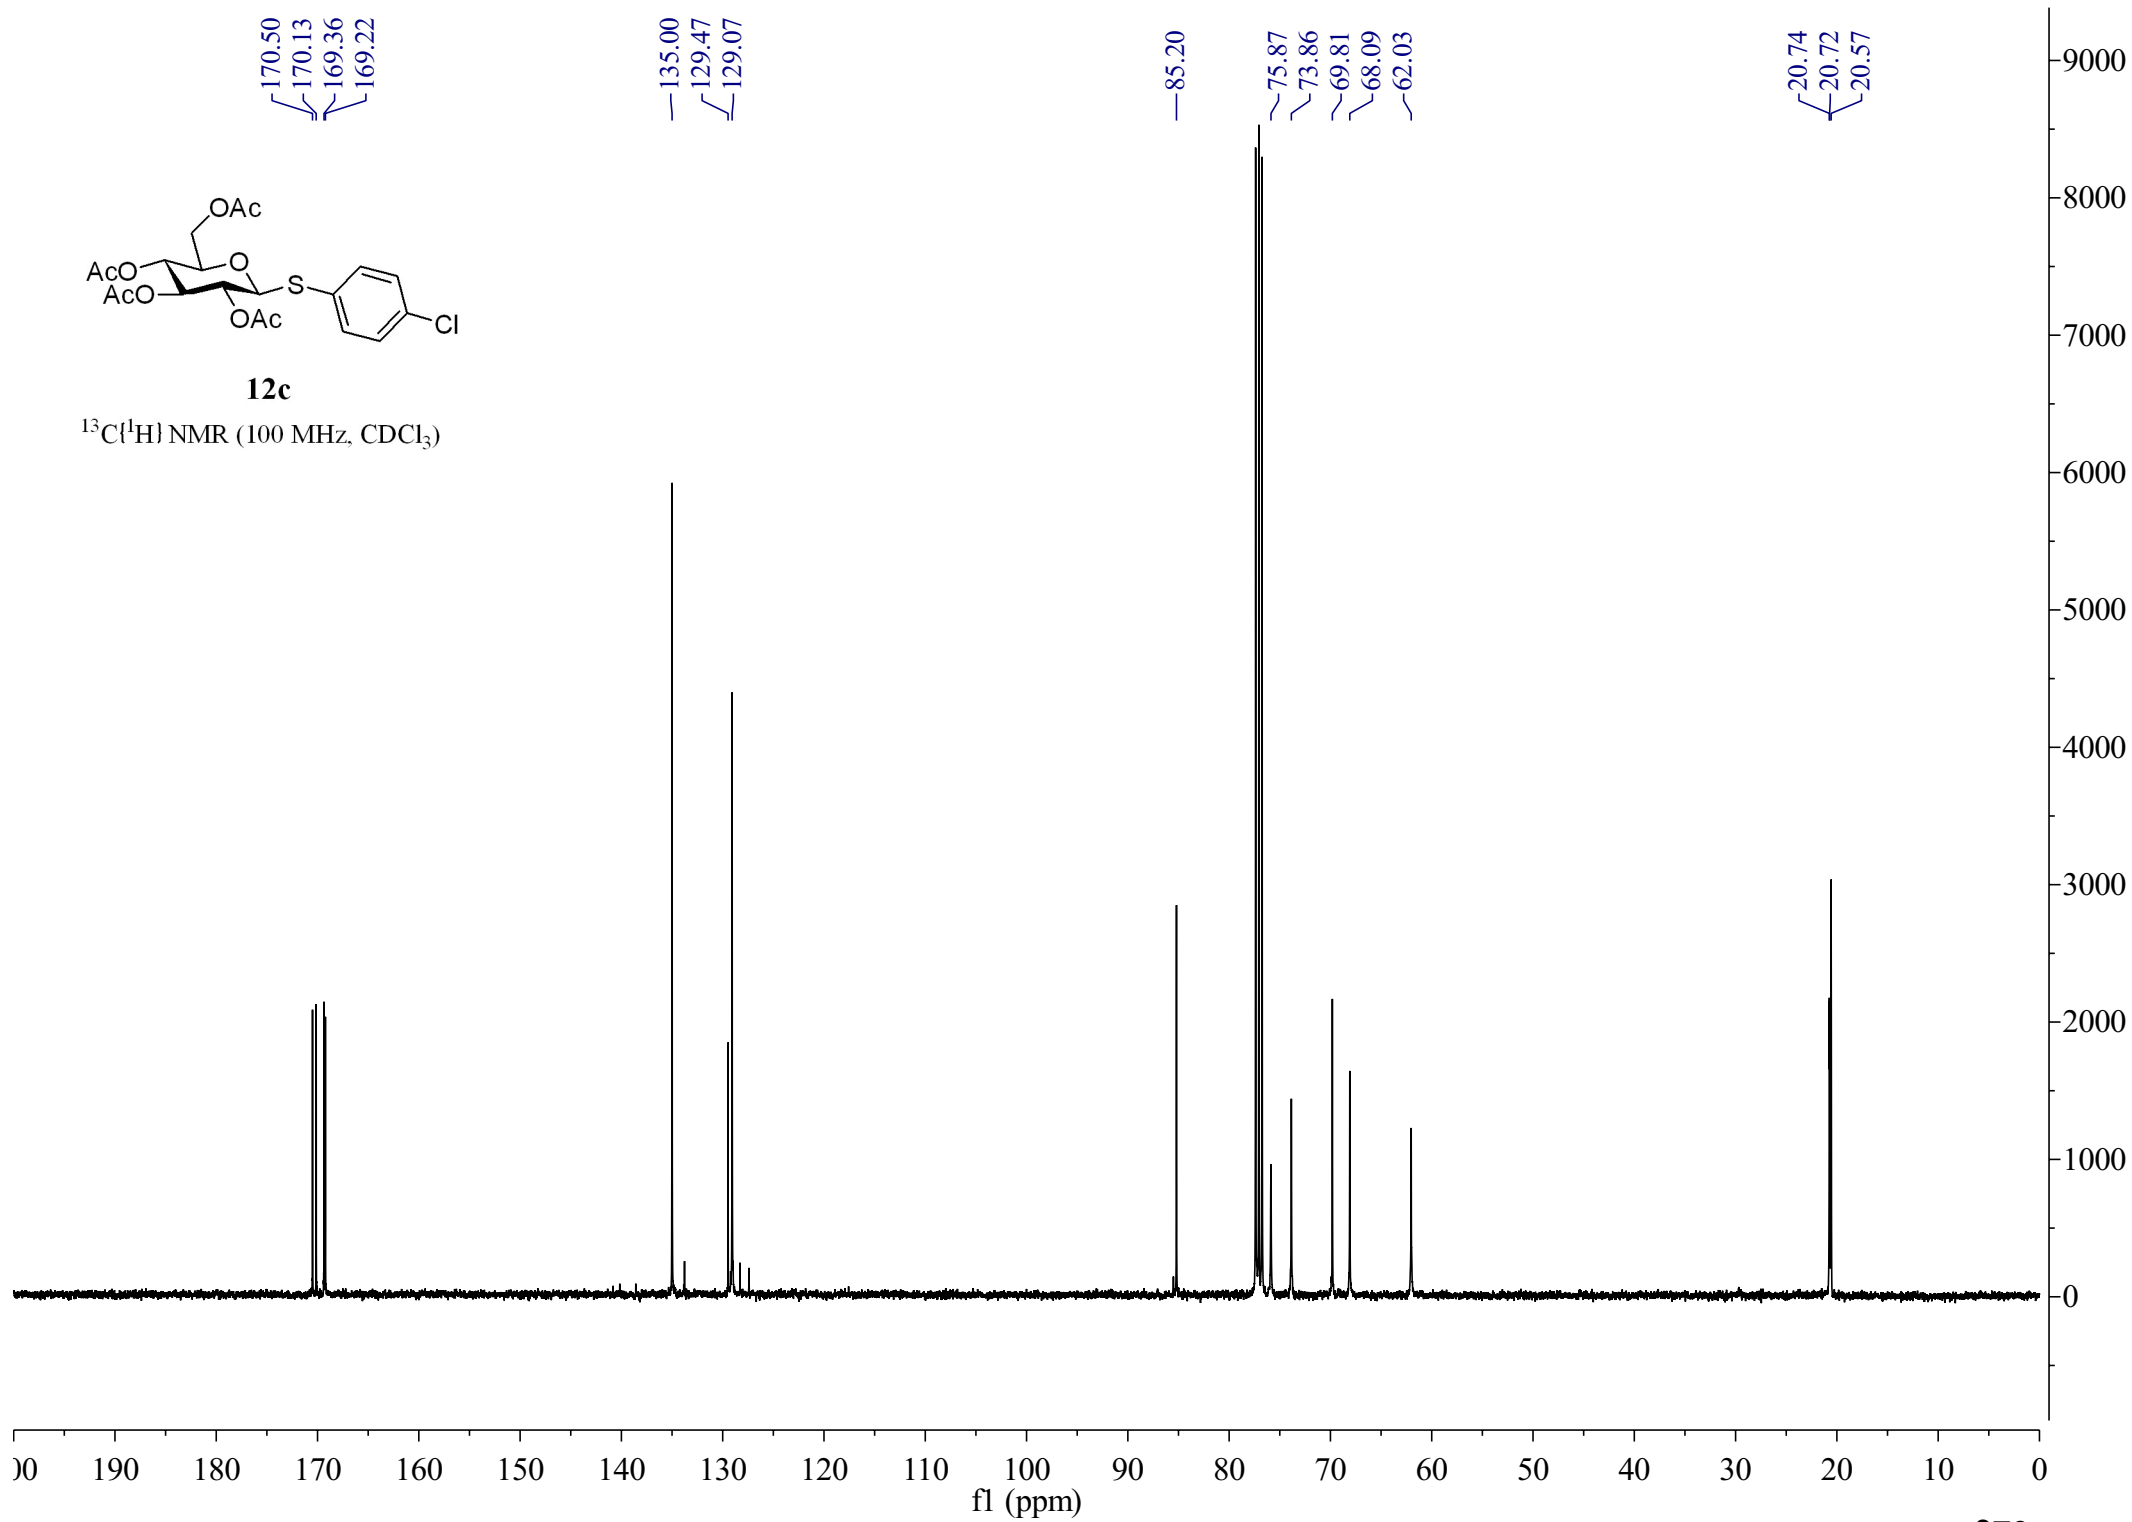

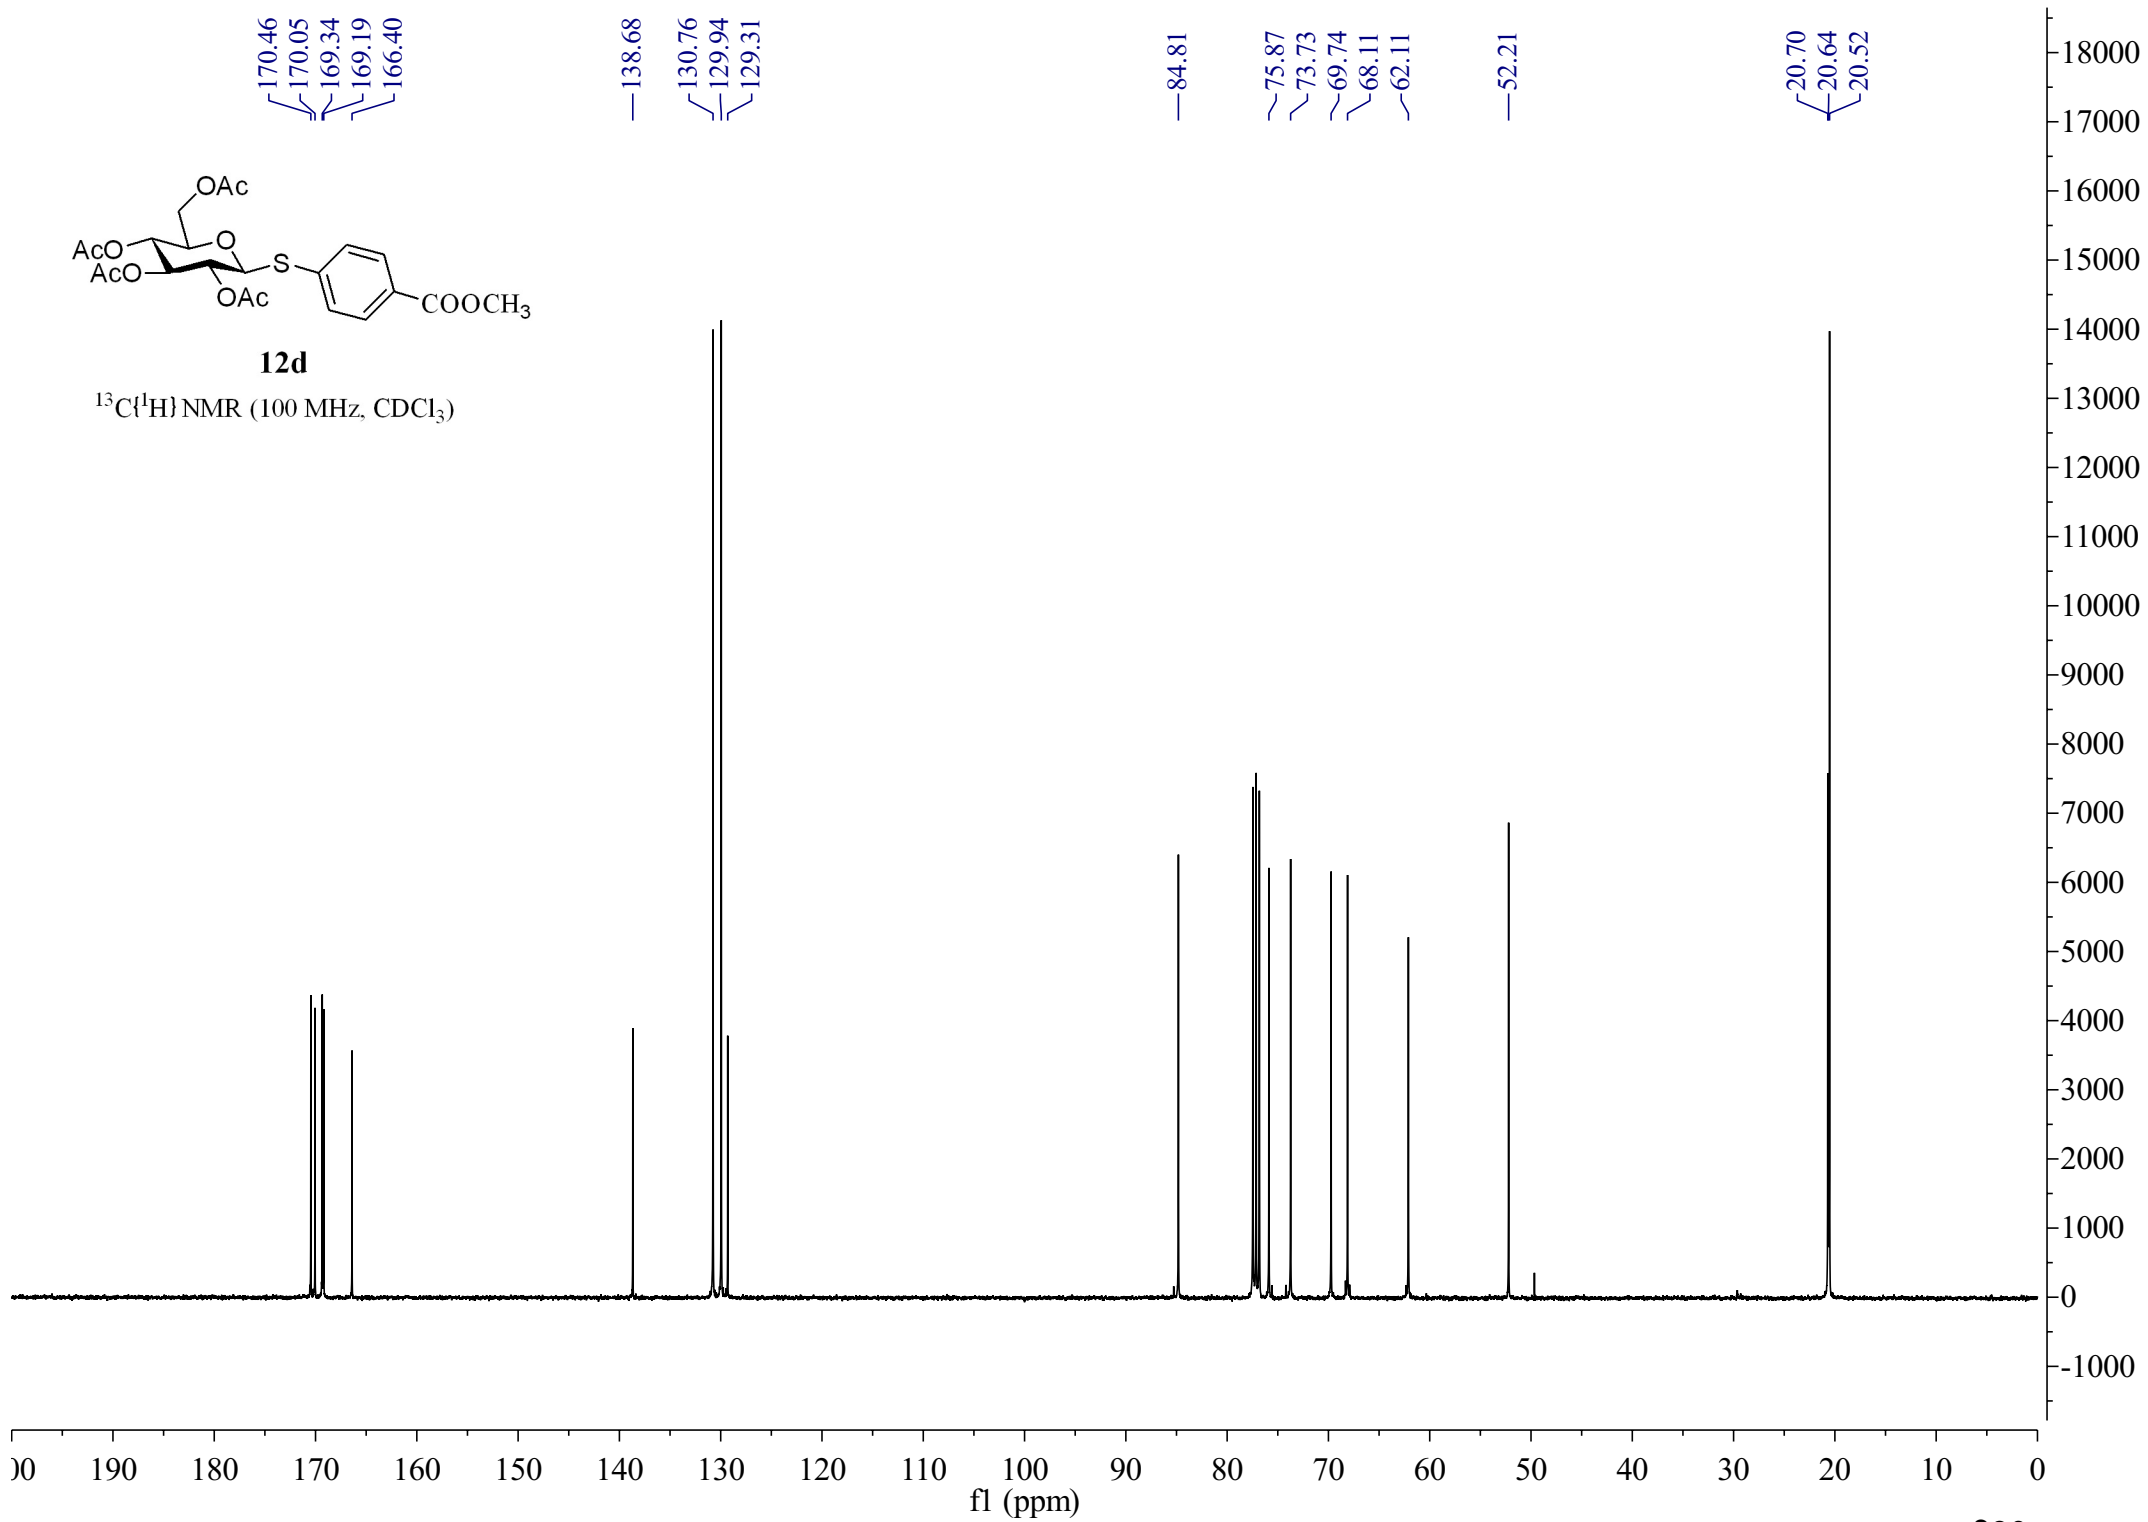



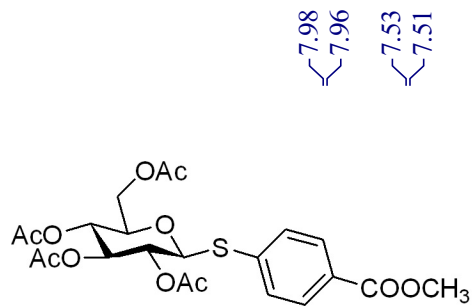

**12d**

<sup>1</sup>H NMR (400 MHz, CDCl<sub>3</sub>)

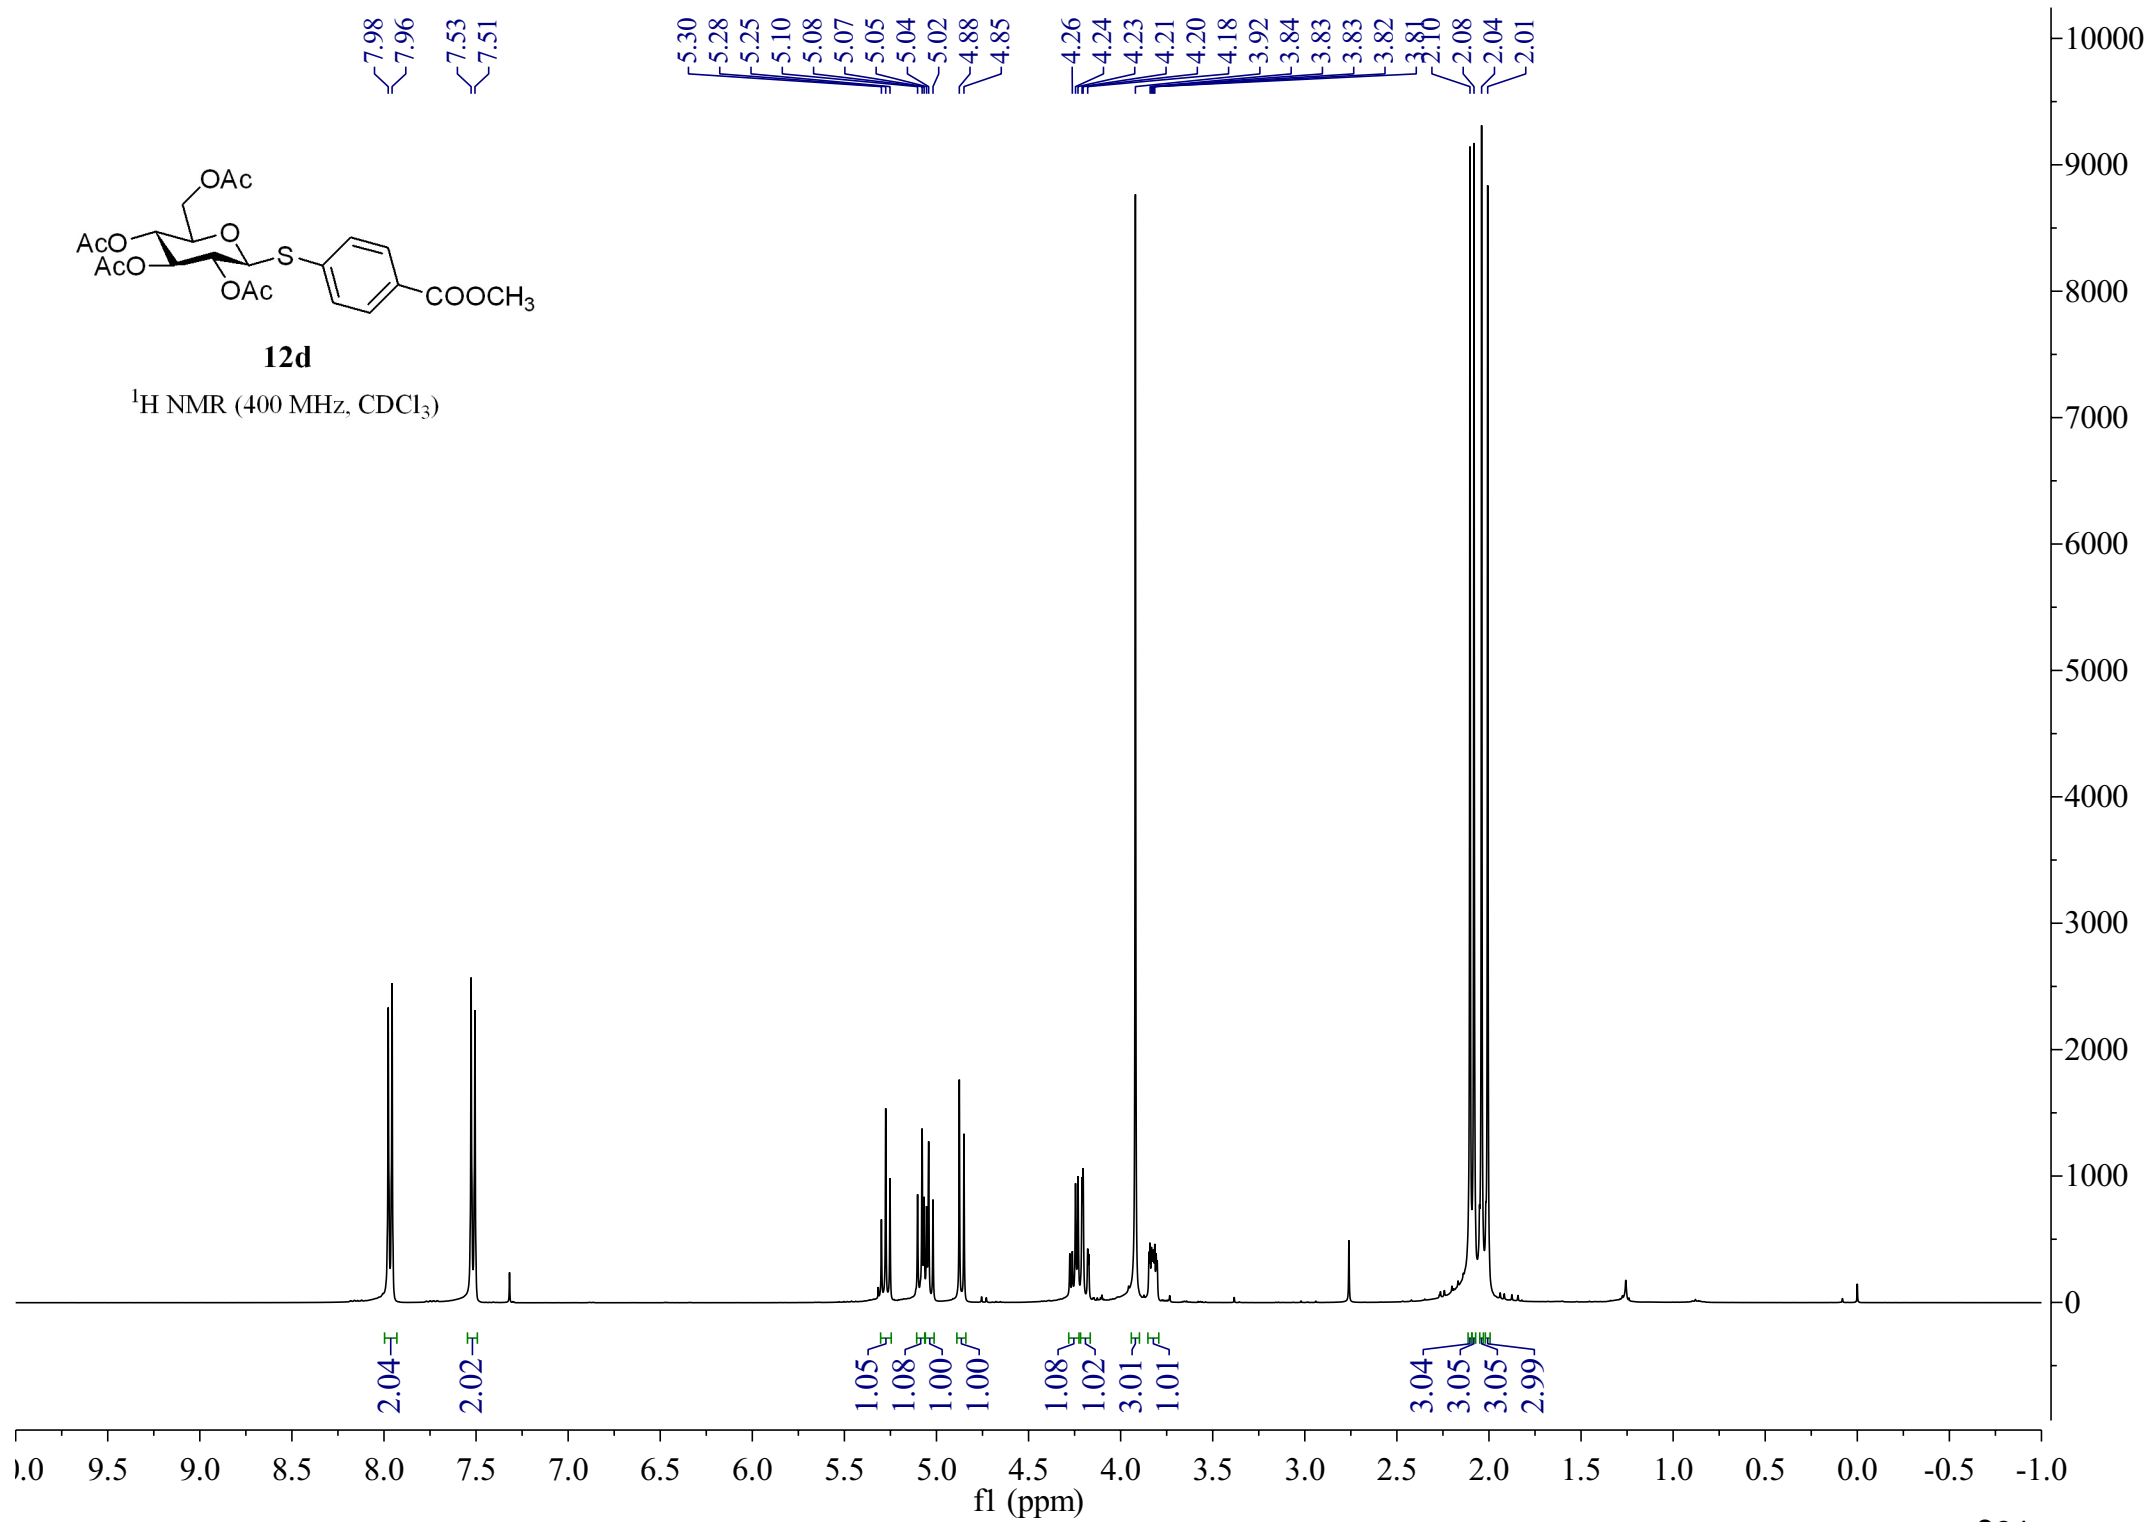

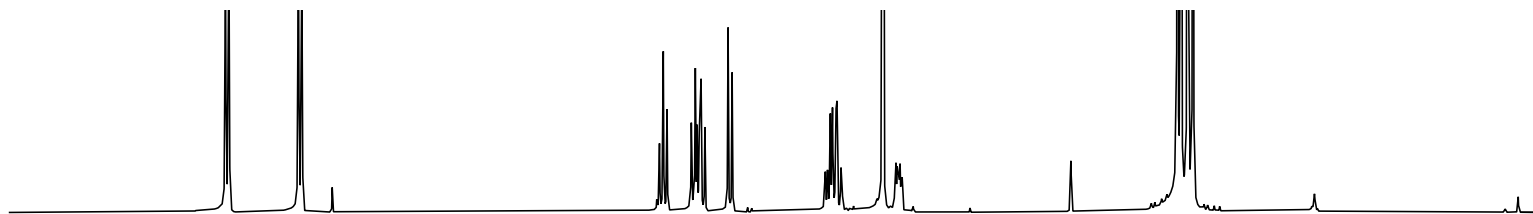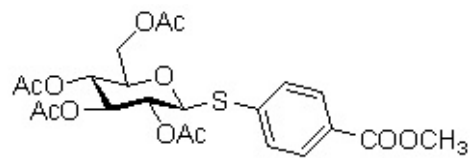

**12d**

$^1\text{H}$ - $^1\text{H}$  COSY (400 MHz,  $\text{CDCl}_3$ )

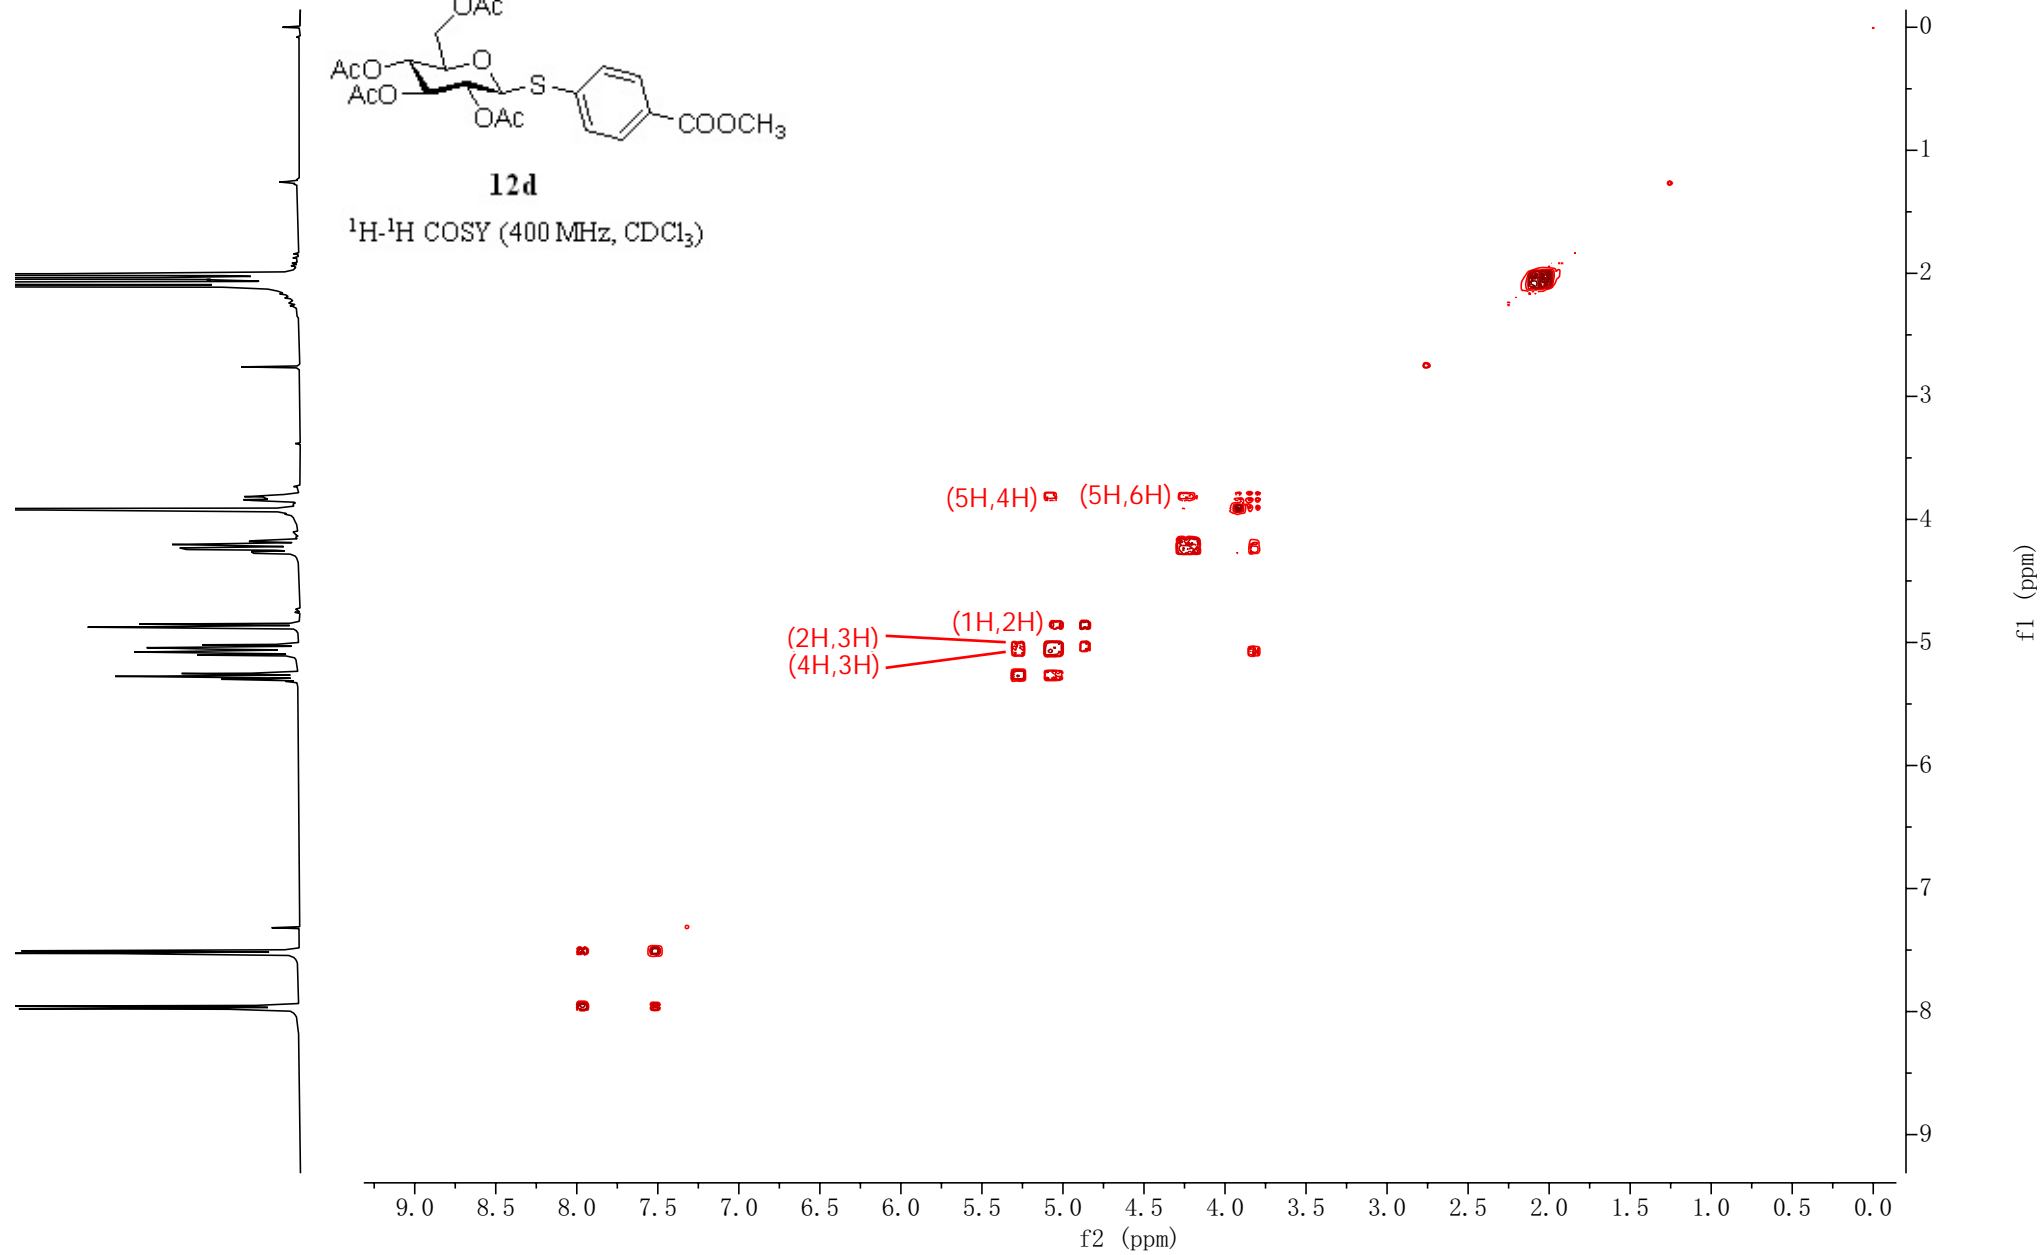

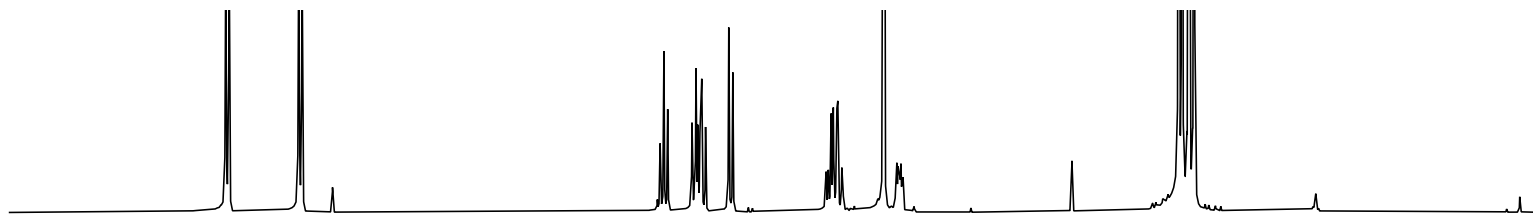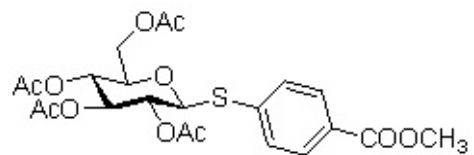

12d

HSQC (400 MHz, CDCl<sub>3</sub>)

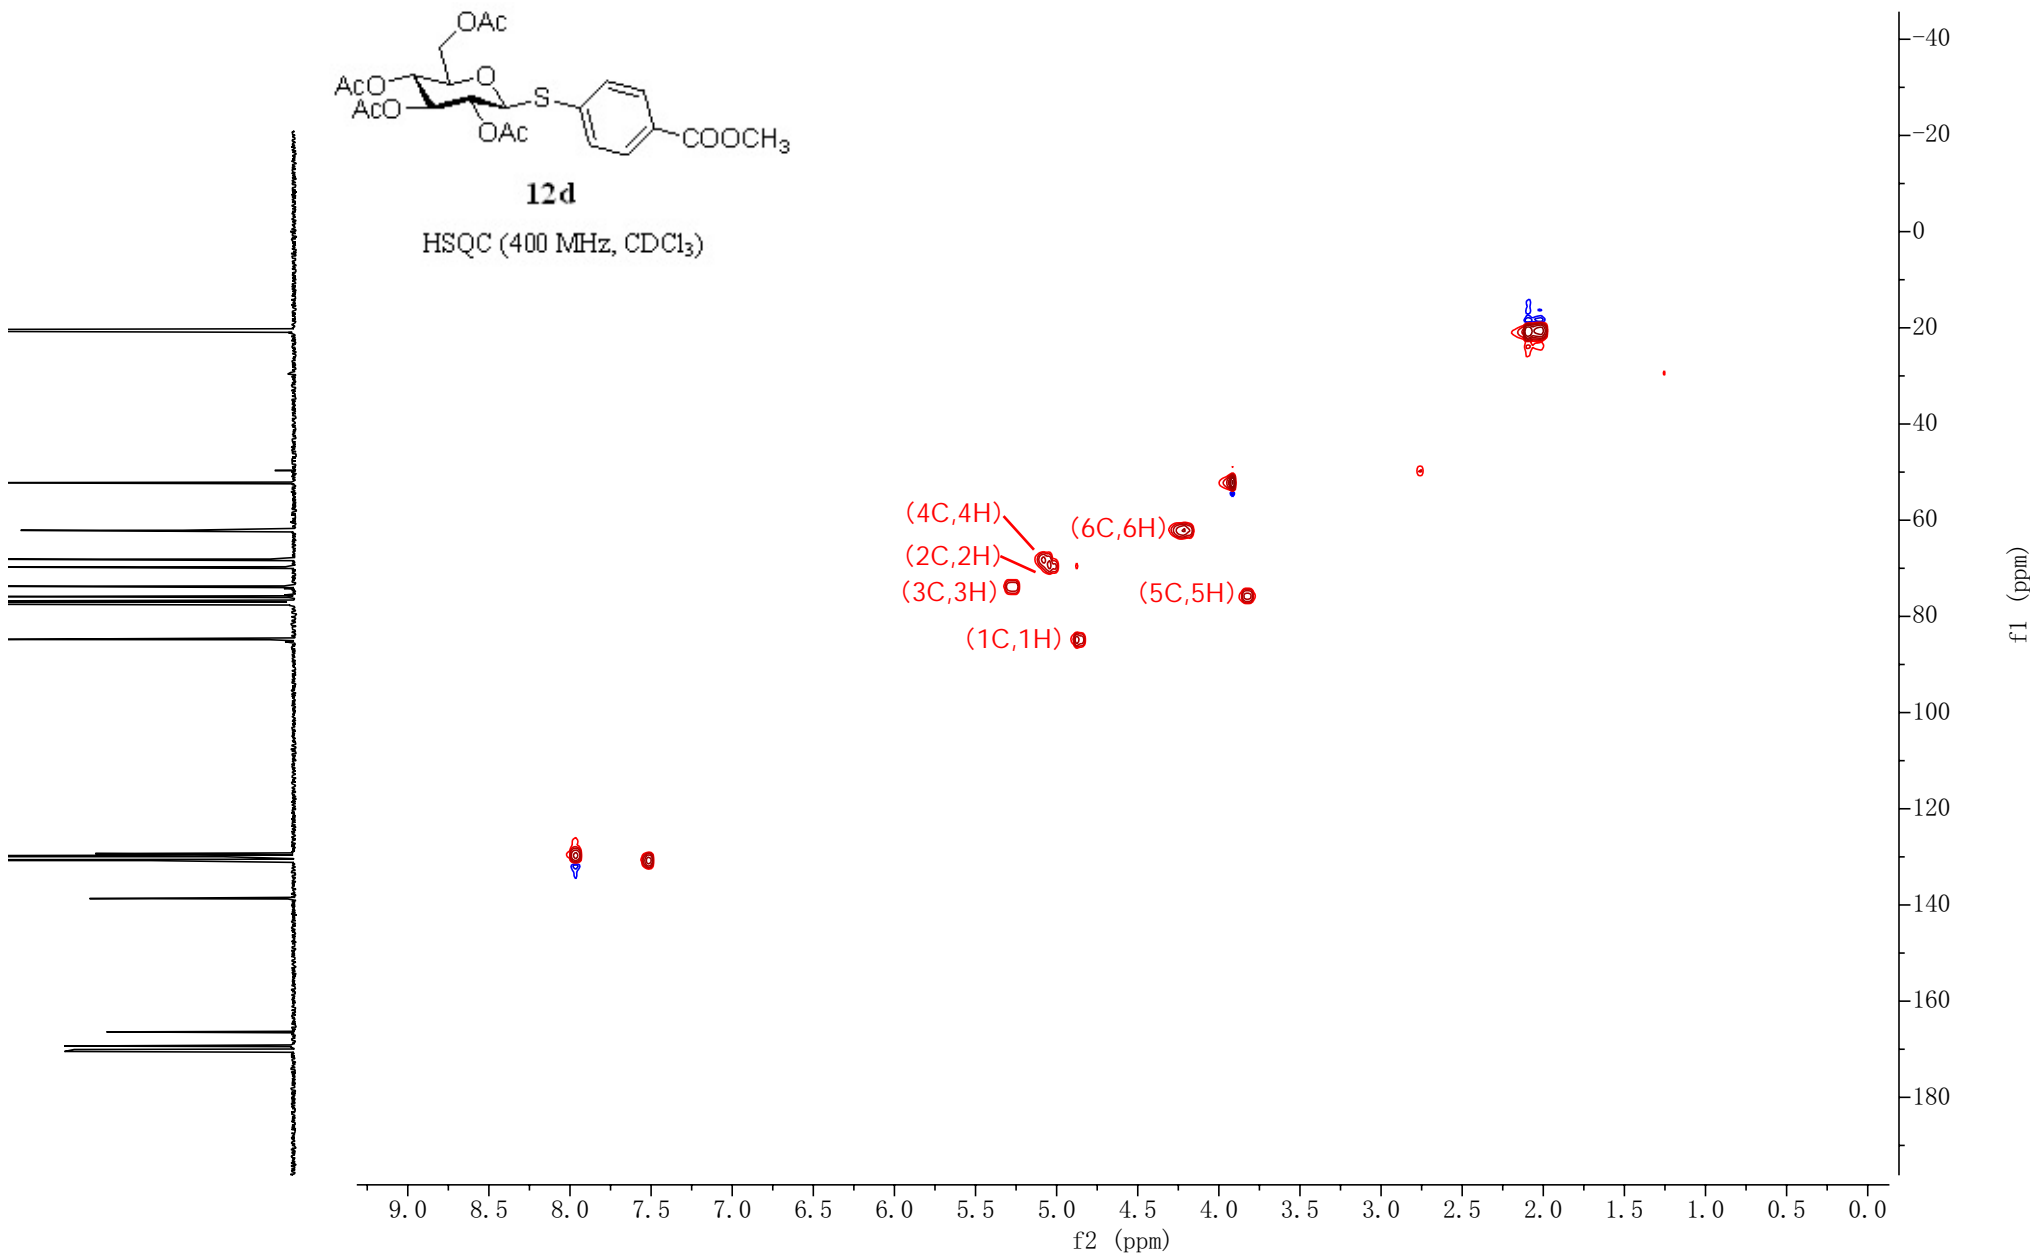

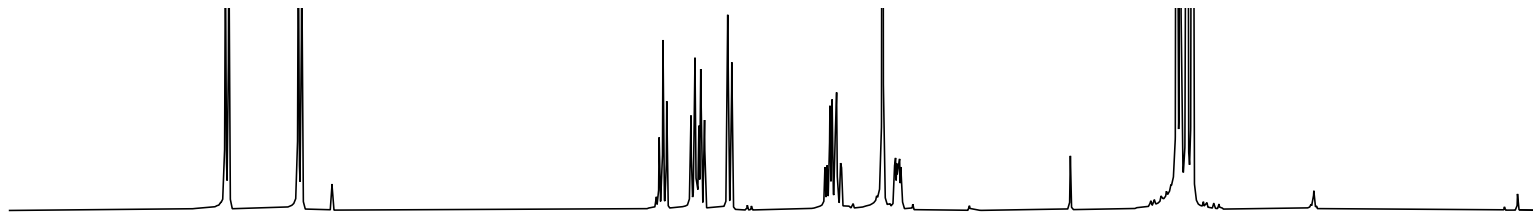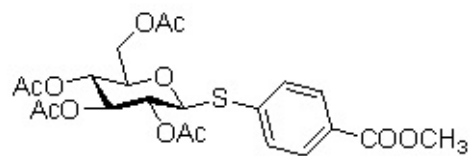

12d

HMBC (400 MHz, CDCl<sub>3</sub>)

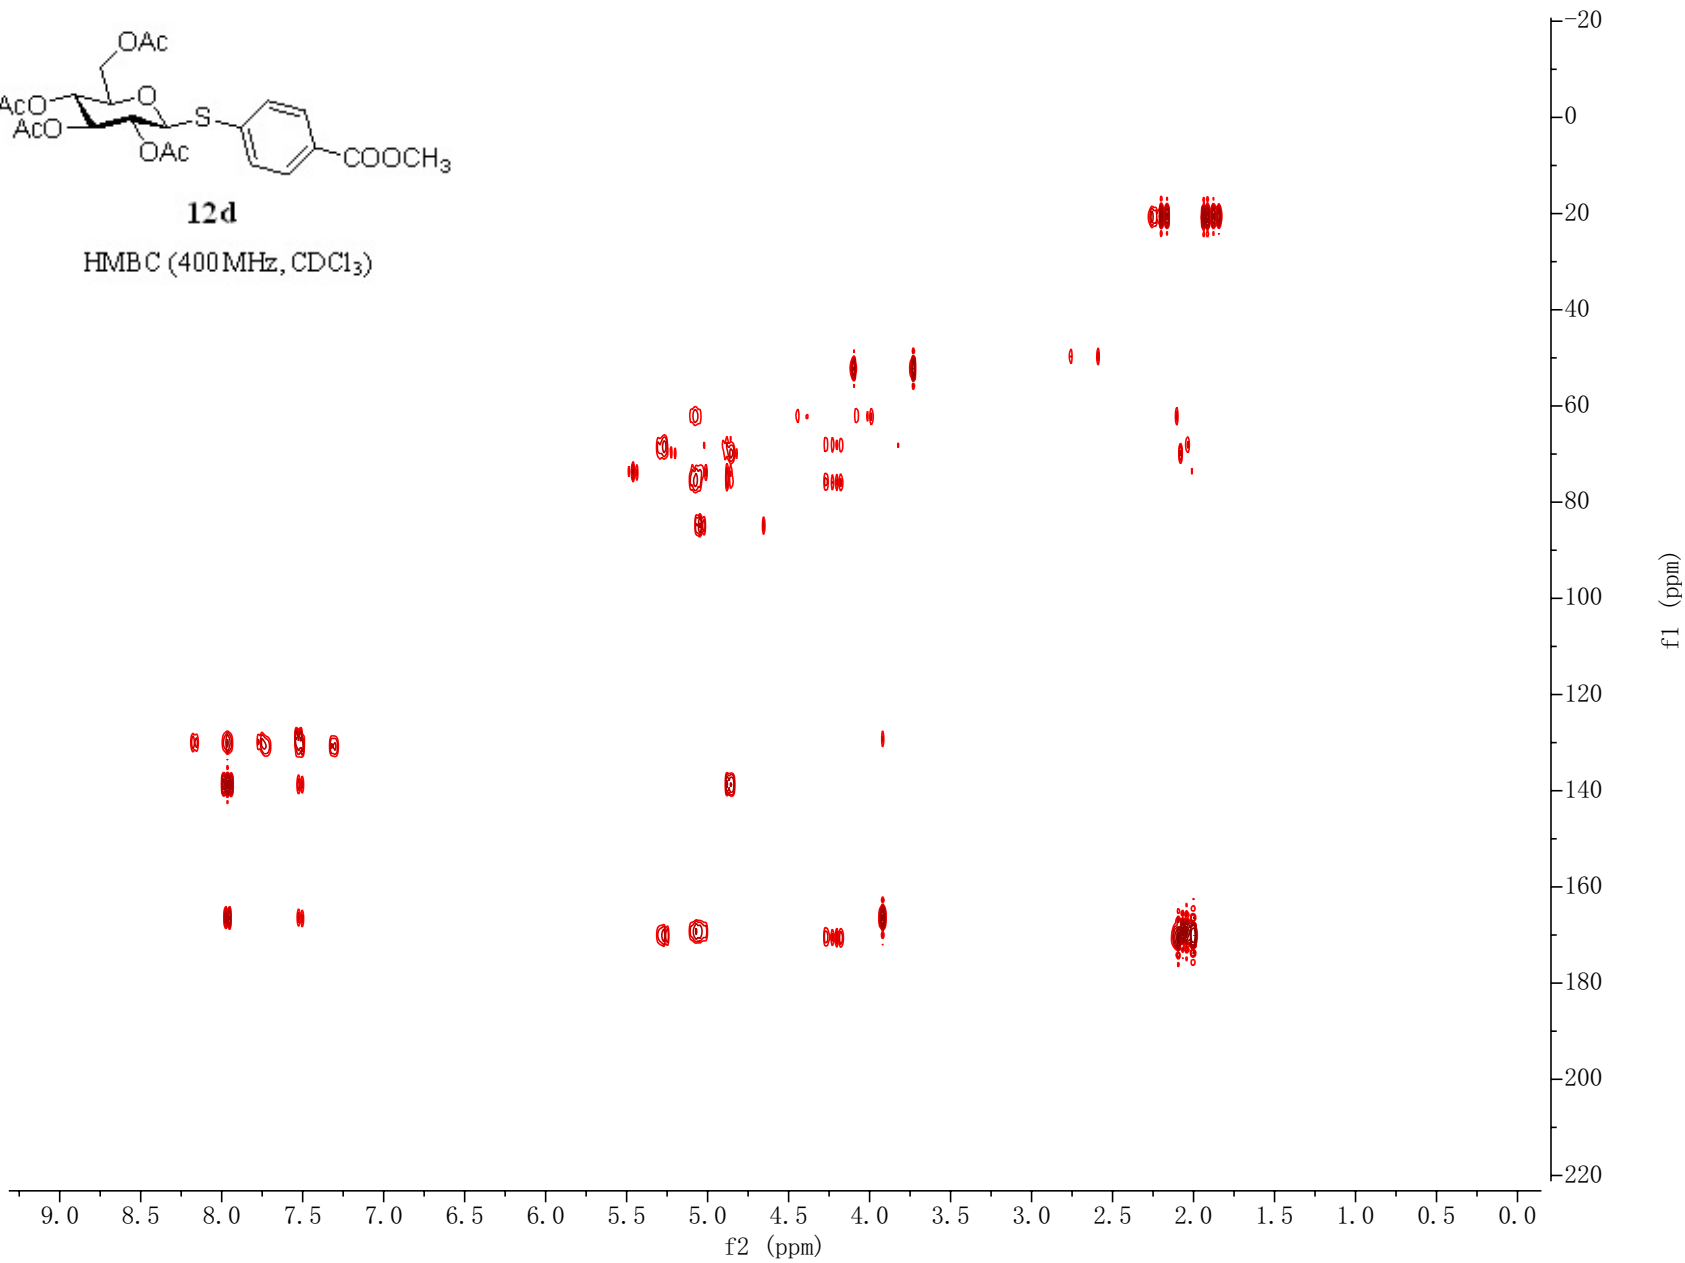

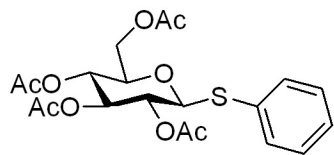

**12e**

$^1\text{H NMR}$  (400 MHz,  $\text{CDCl}_3$ )

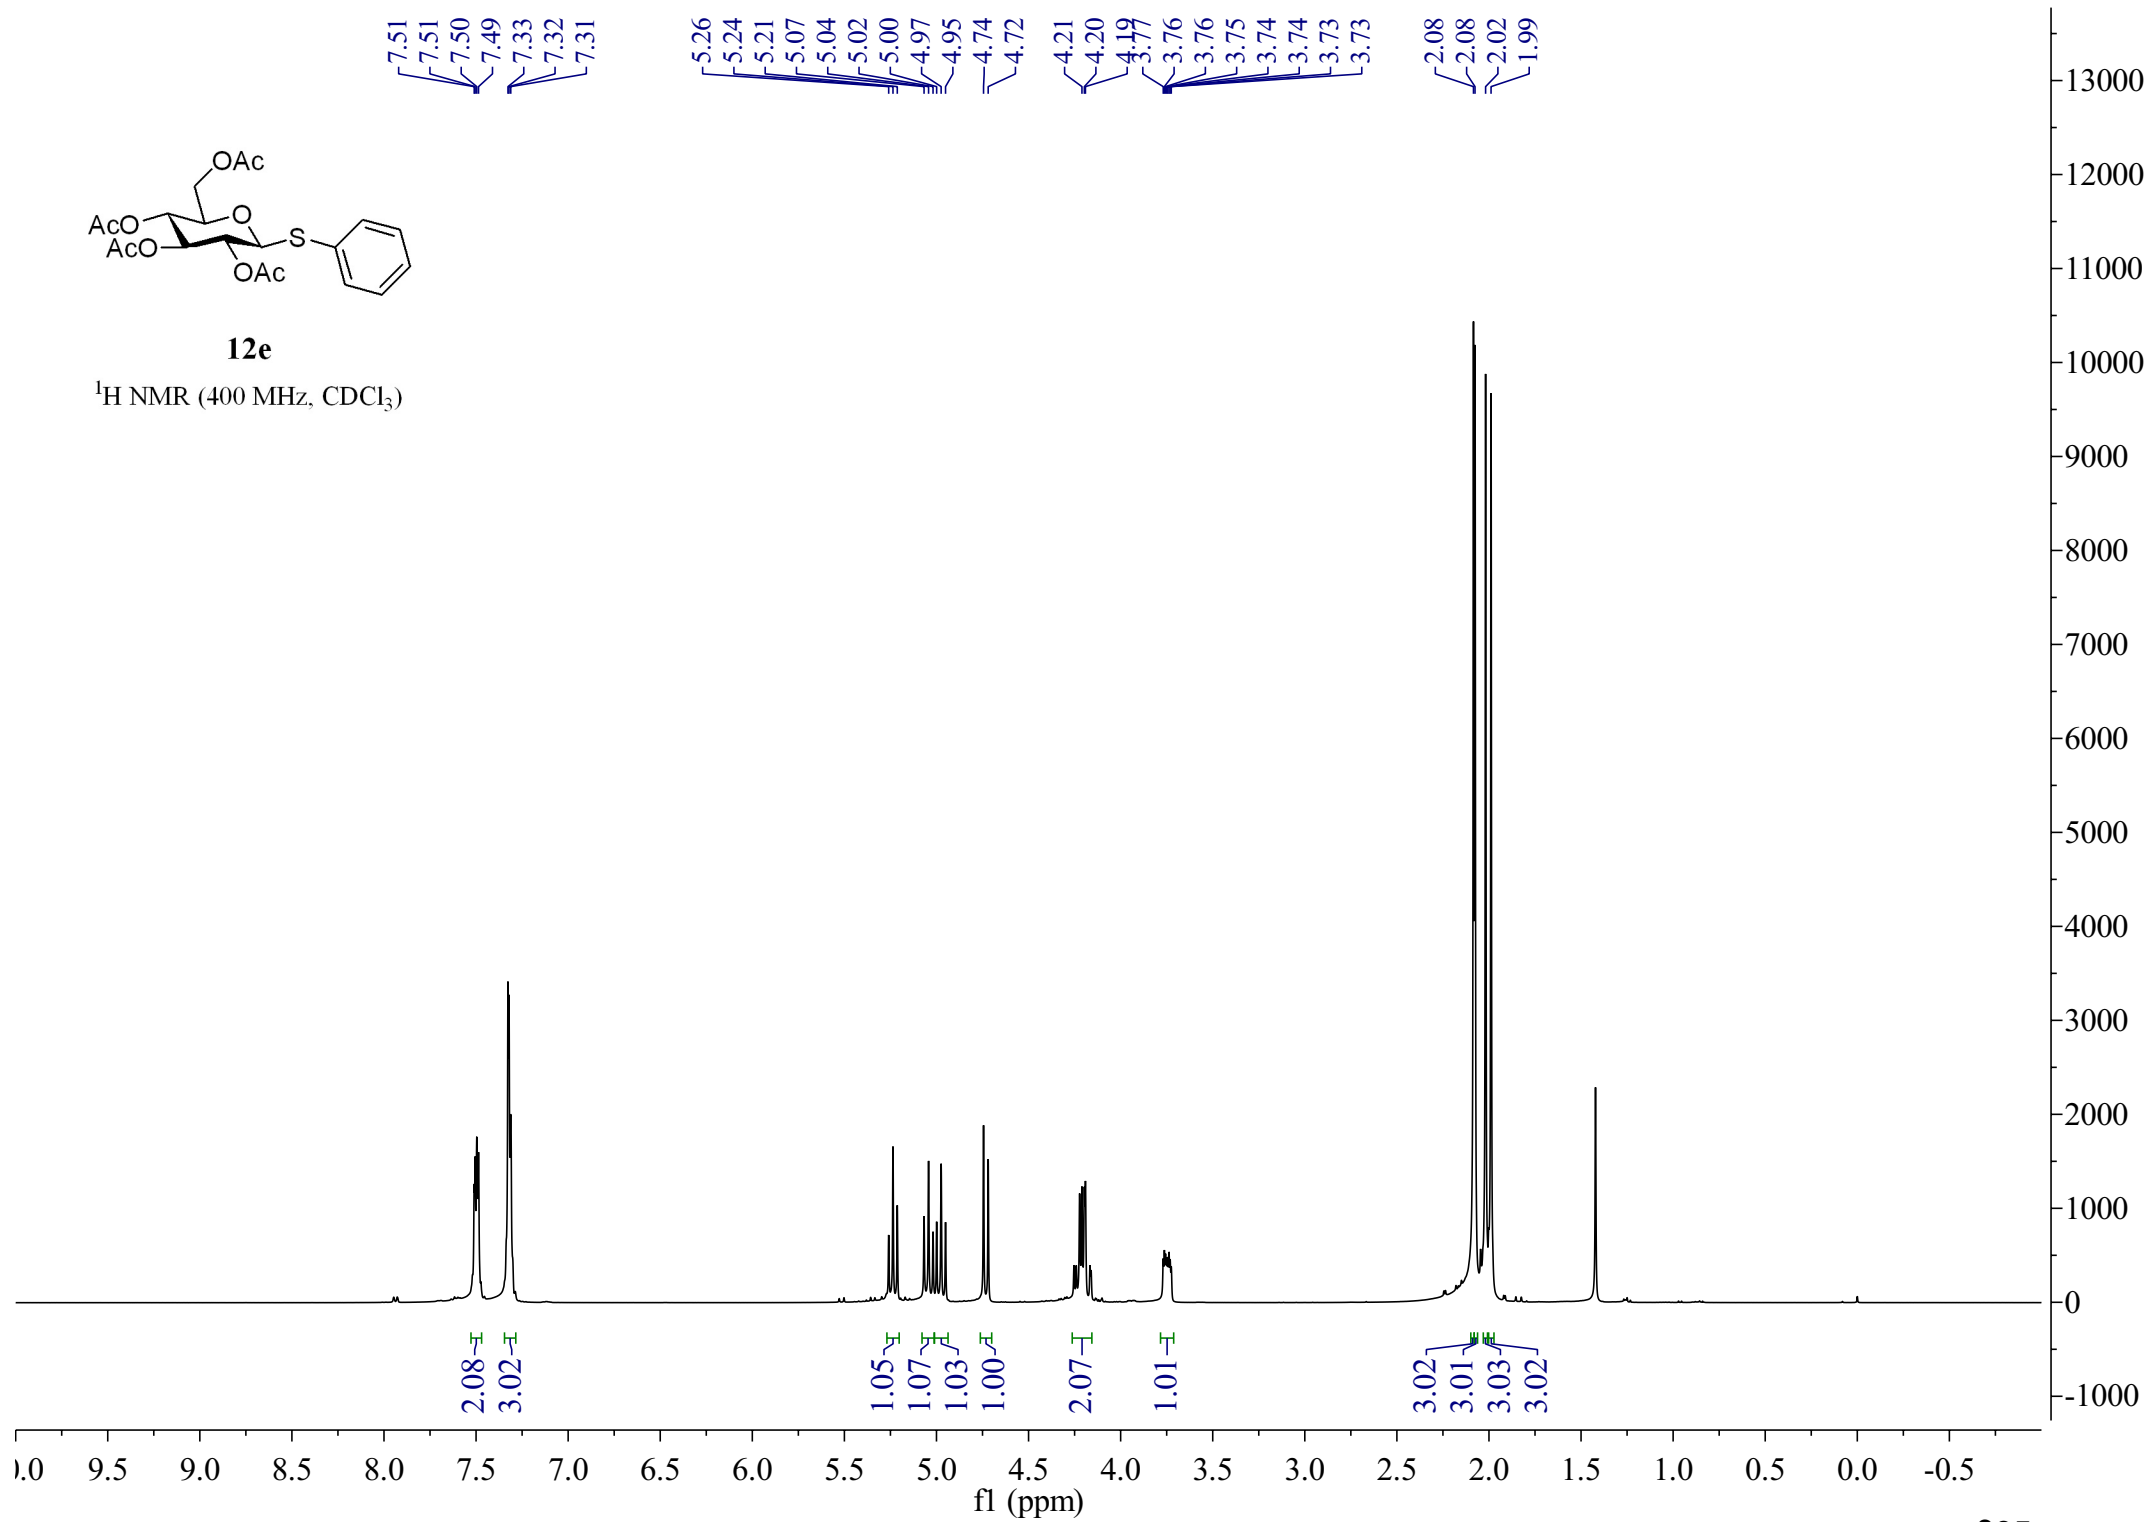

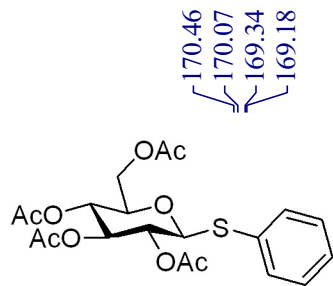

**12e**

$^{13}\text{C}\{^1\text{H}\}$  NMR (100 MHz,  $\text{CDCl}_3$ )

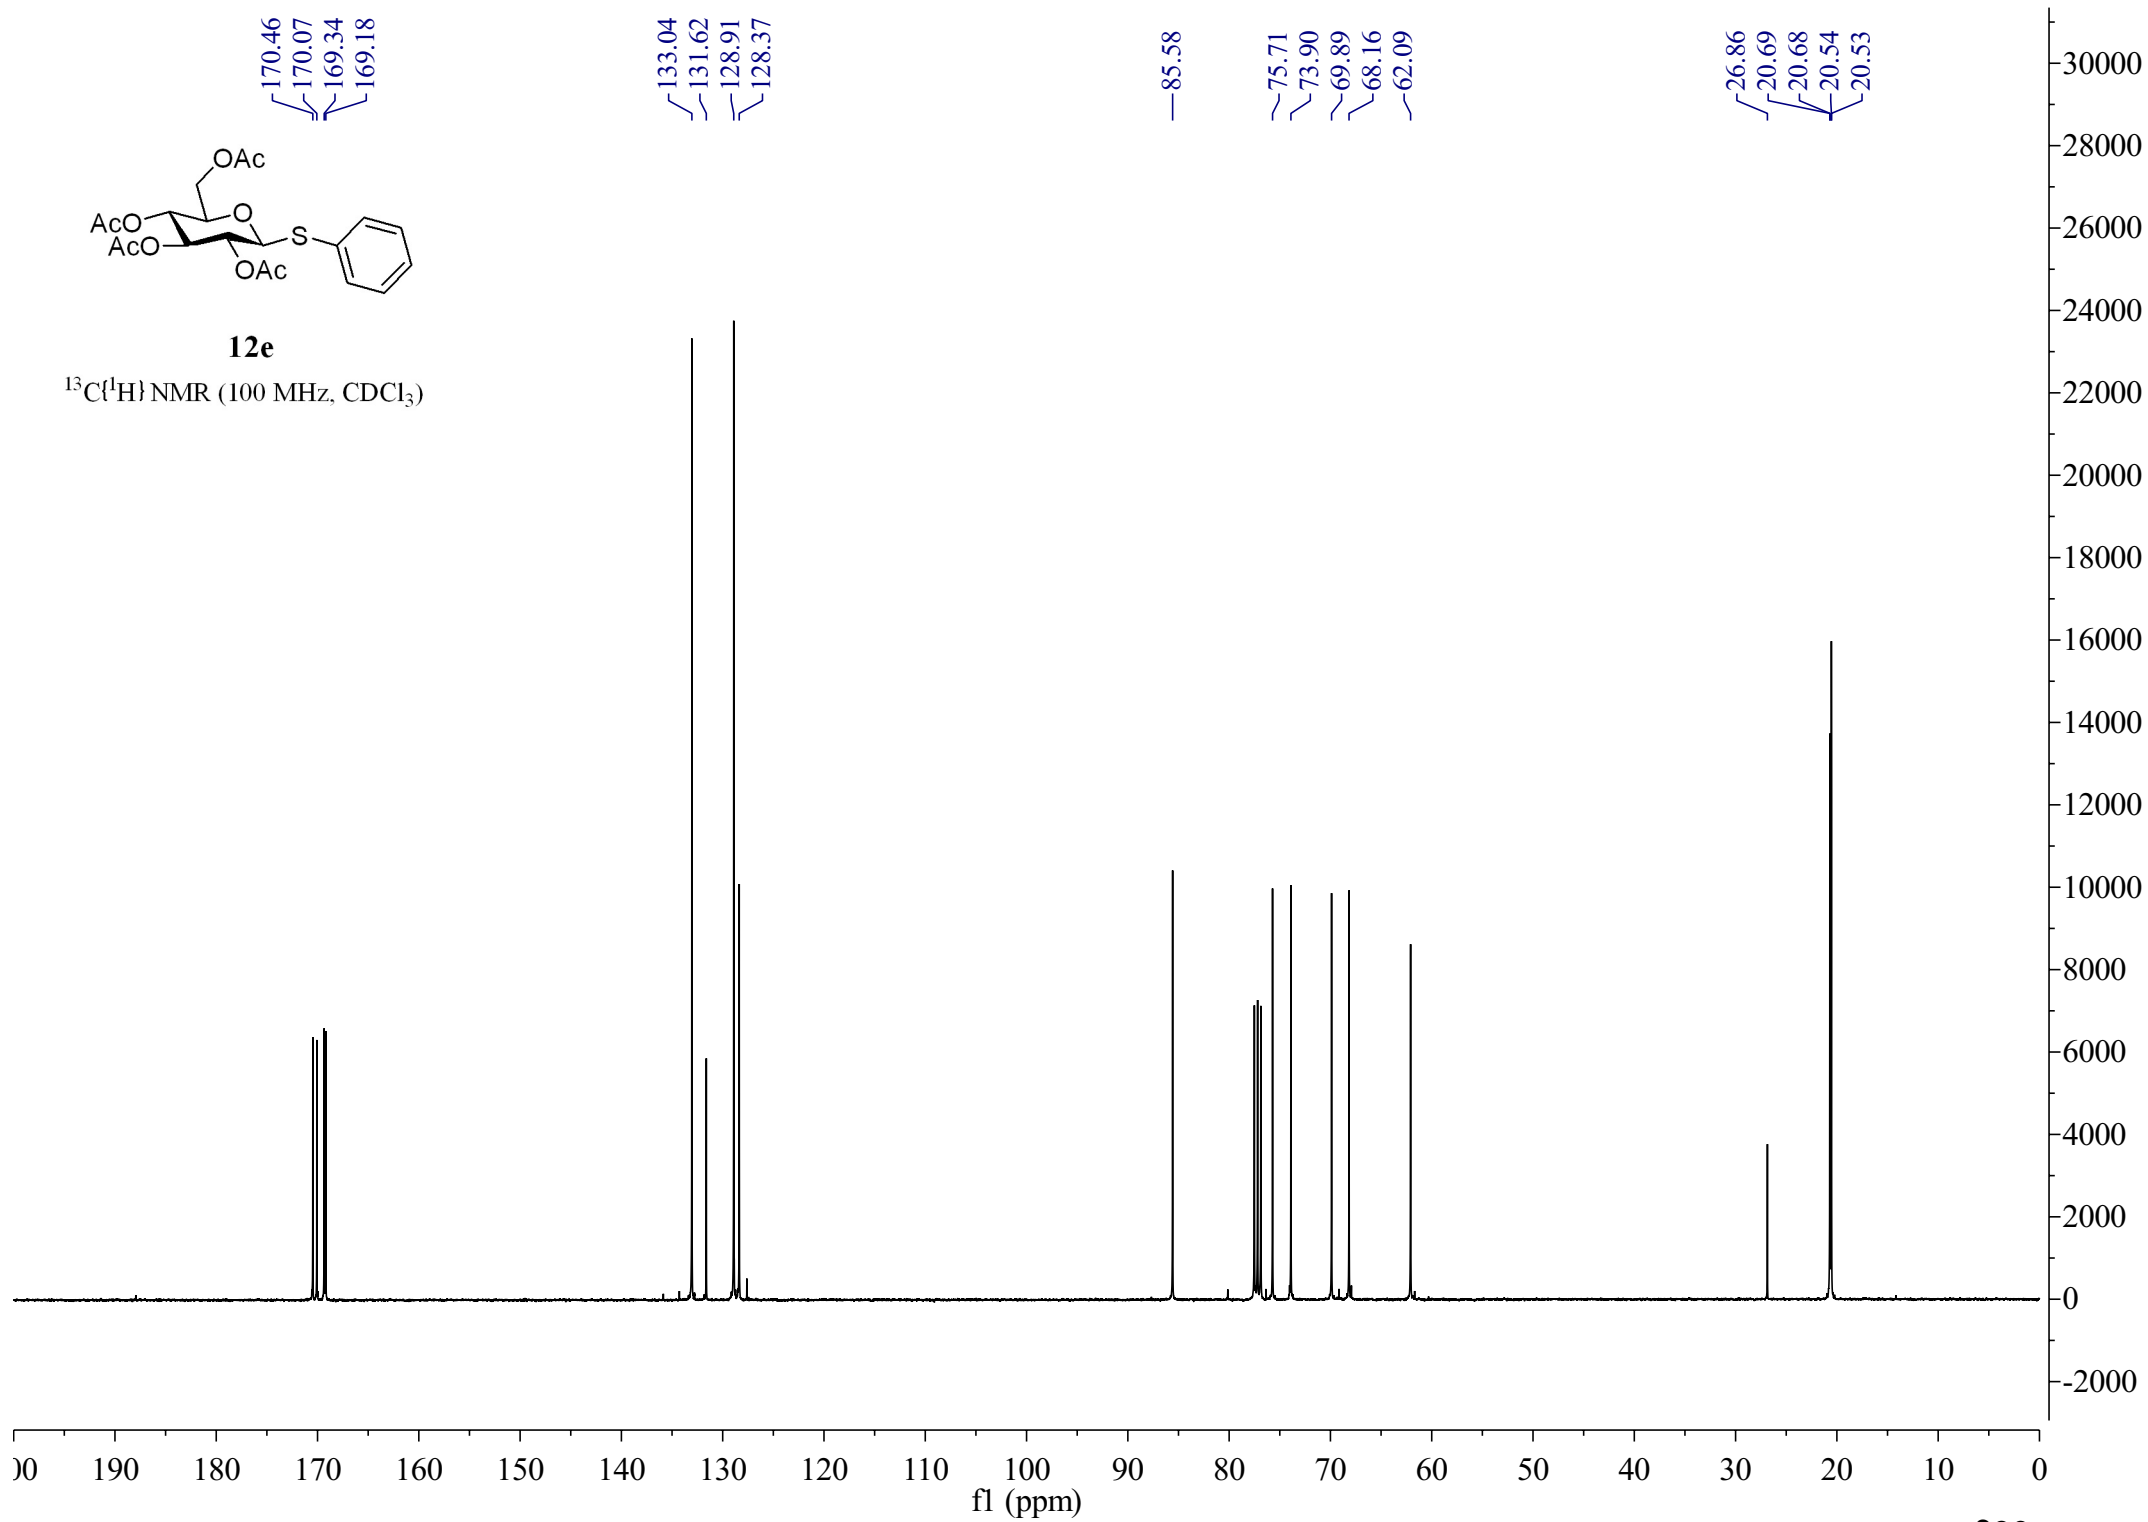

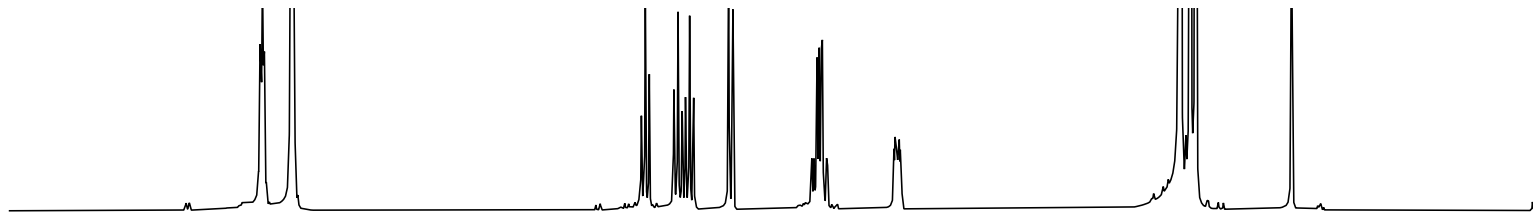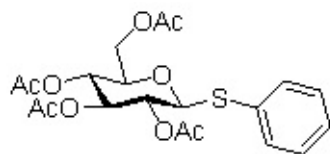

**12e**

$^1\text{H}$ - $^1\text{H}$  COSY (400 MHz,  $\text{CDCl}_3$ )

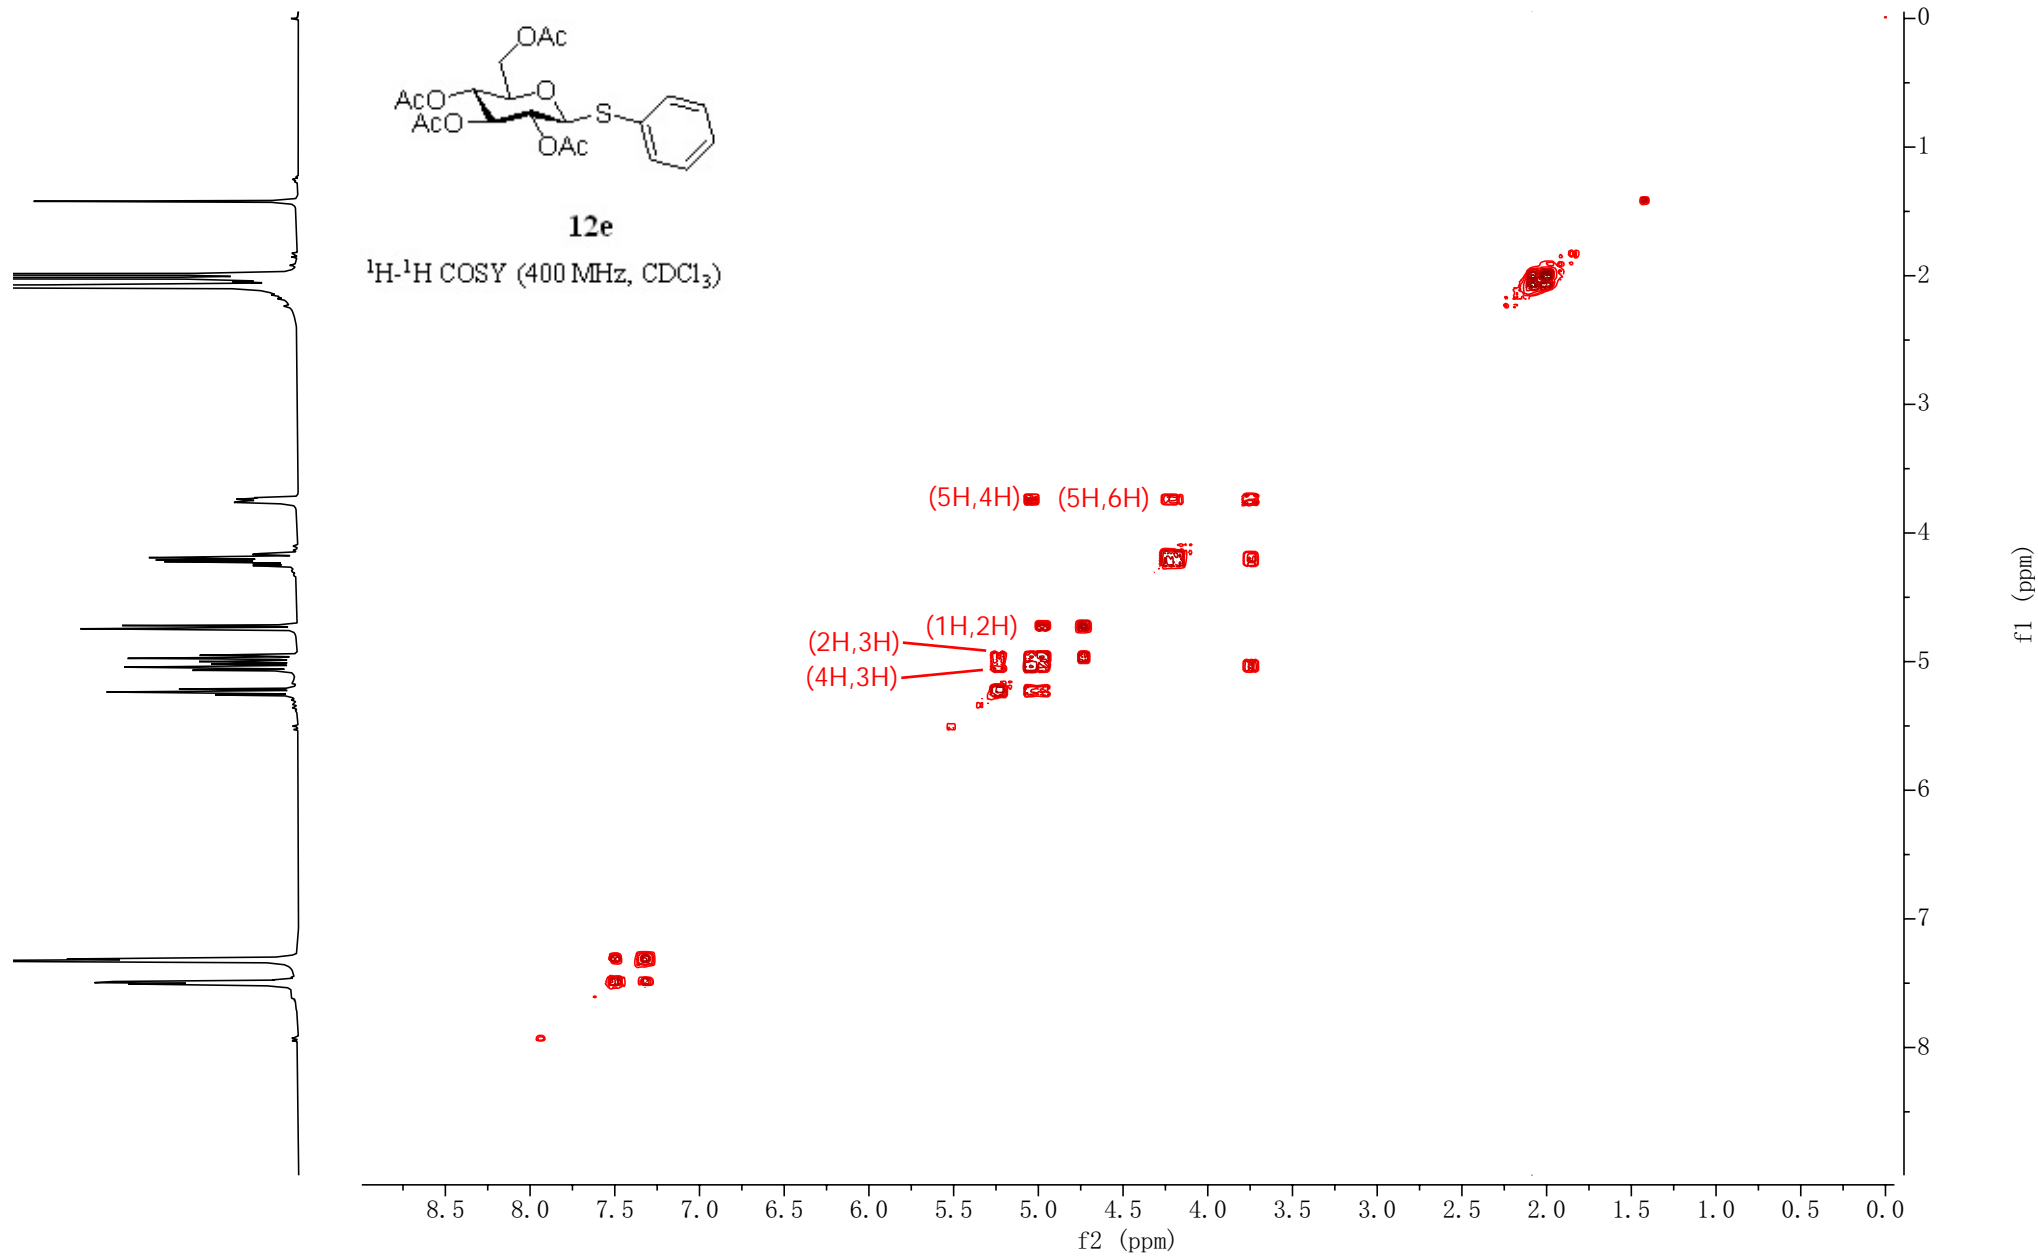

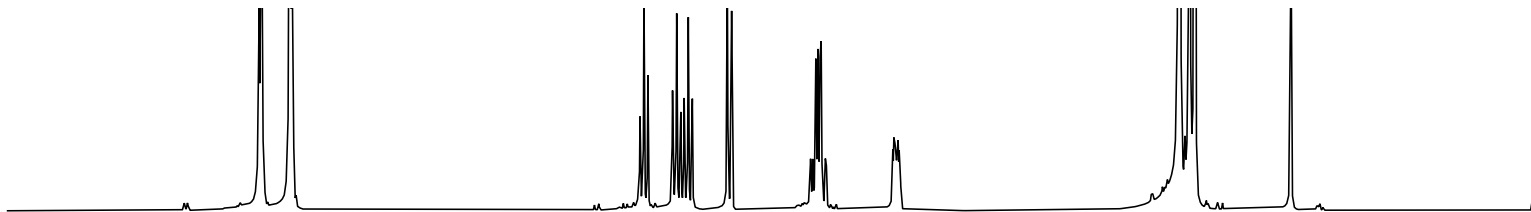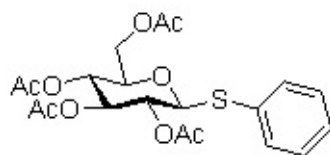

12e

HSQC (400MHz, CDCl<sub>3</sub>)

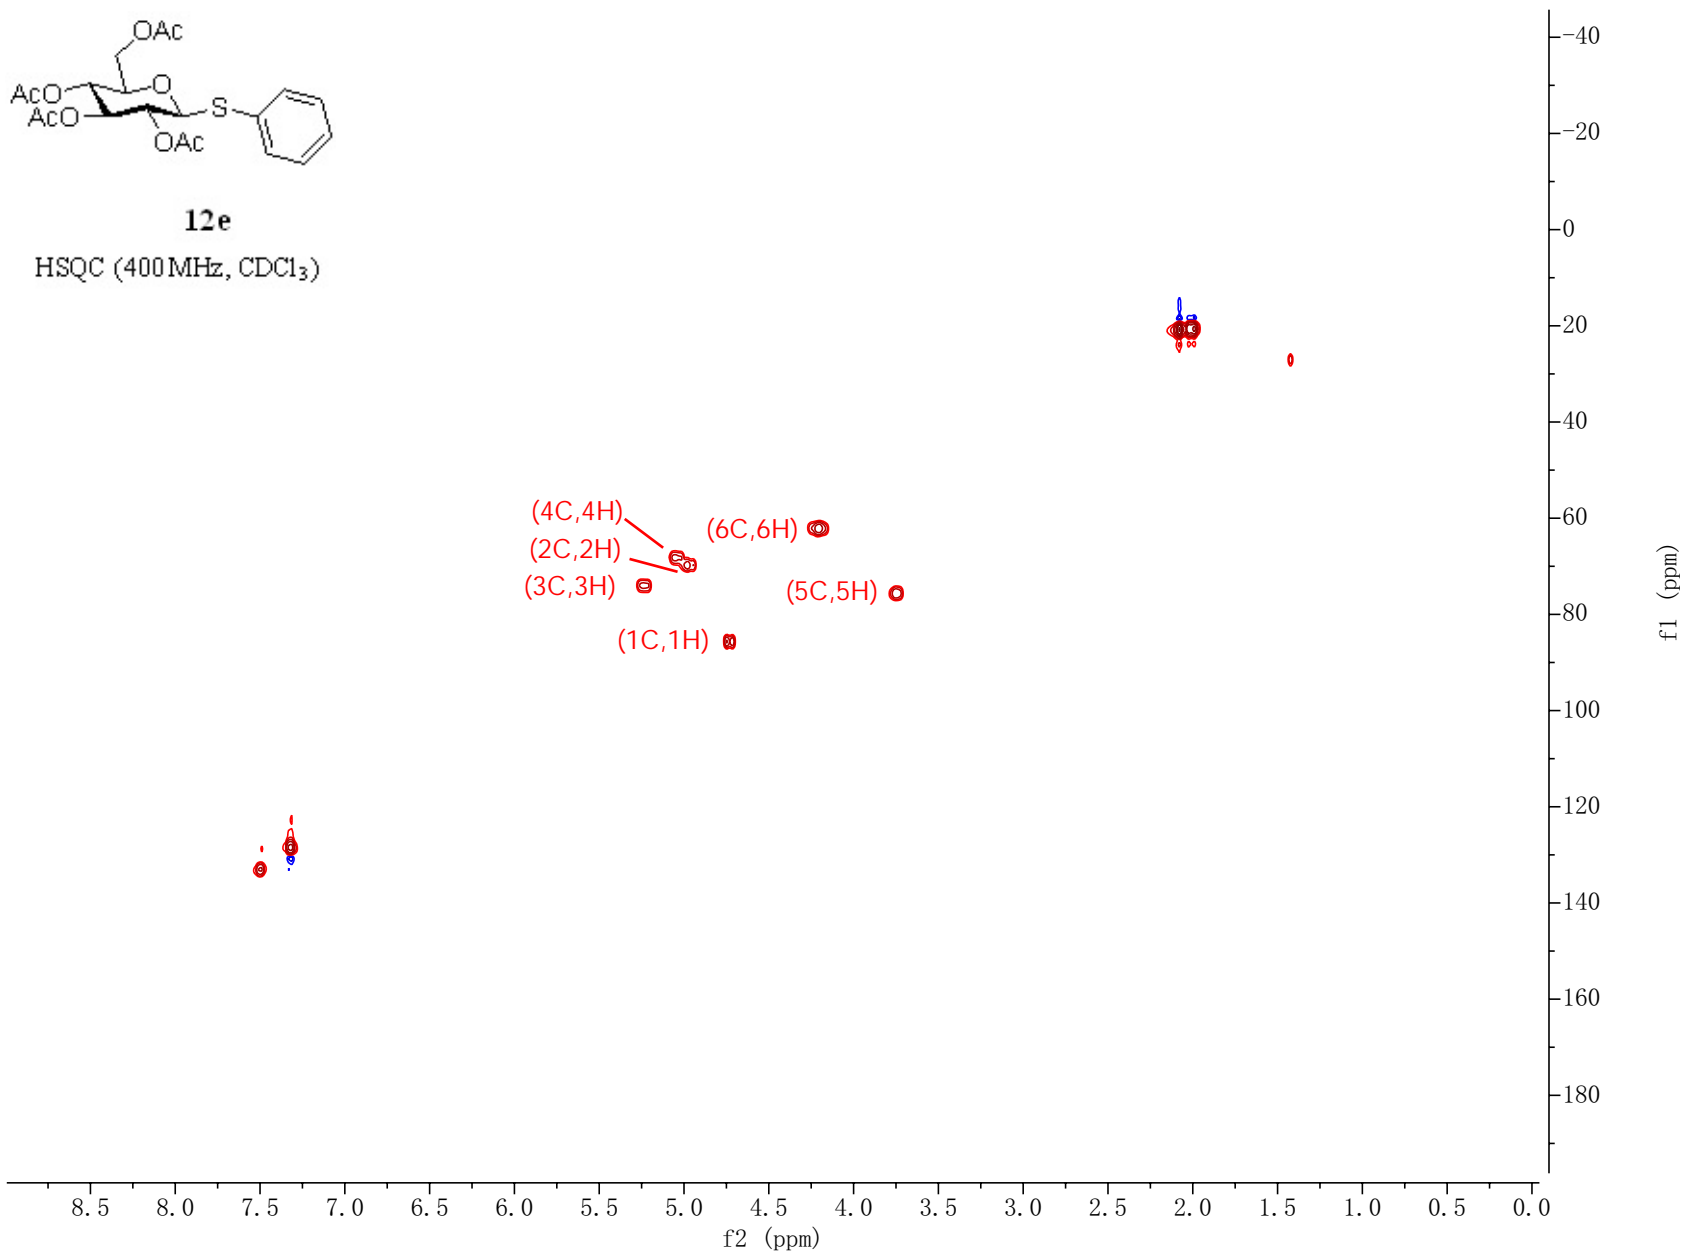



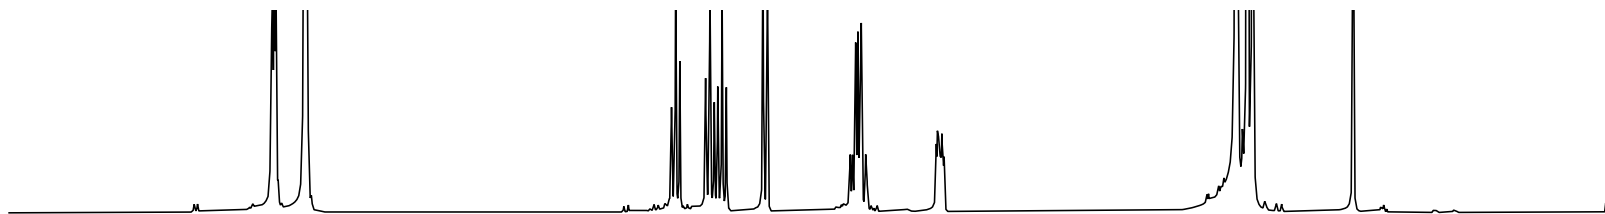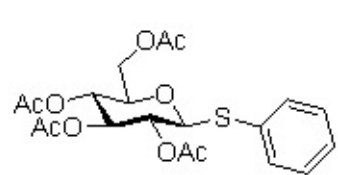

12e

HMBC (400 MHz, CDCl<sub>3</sub>)

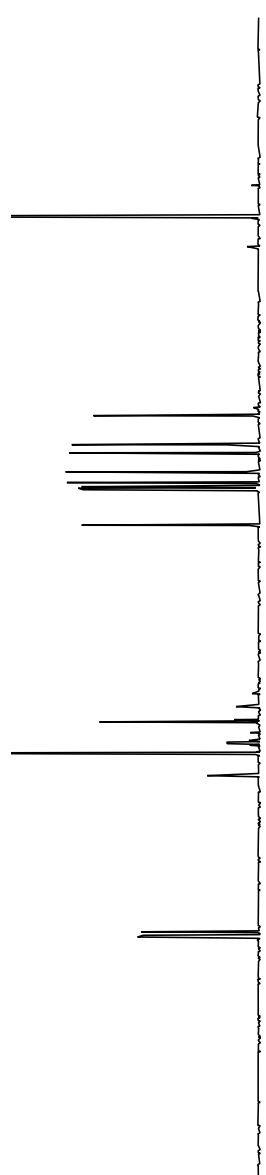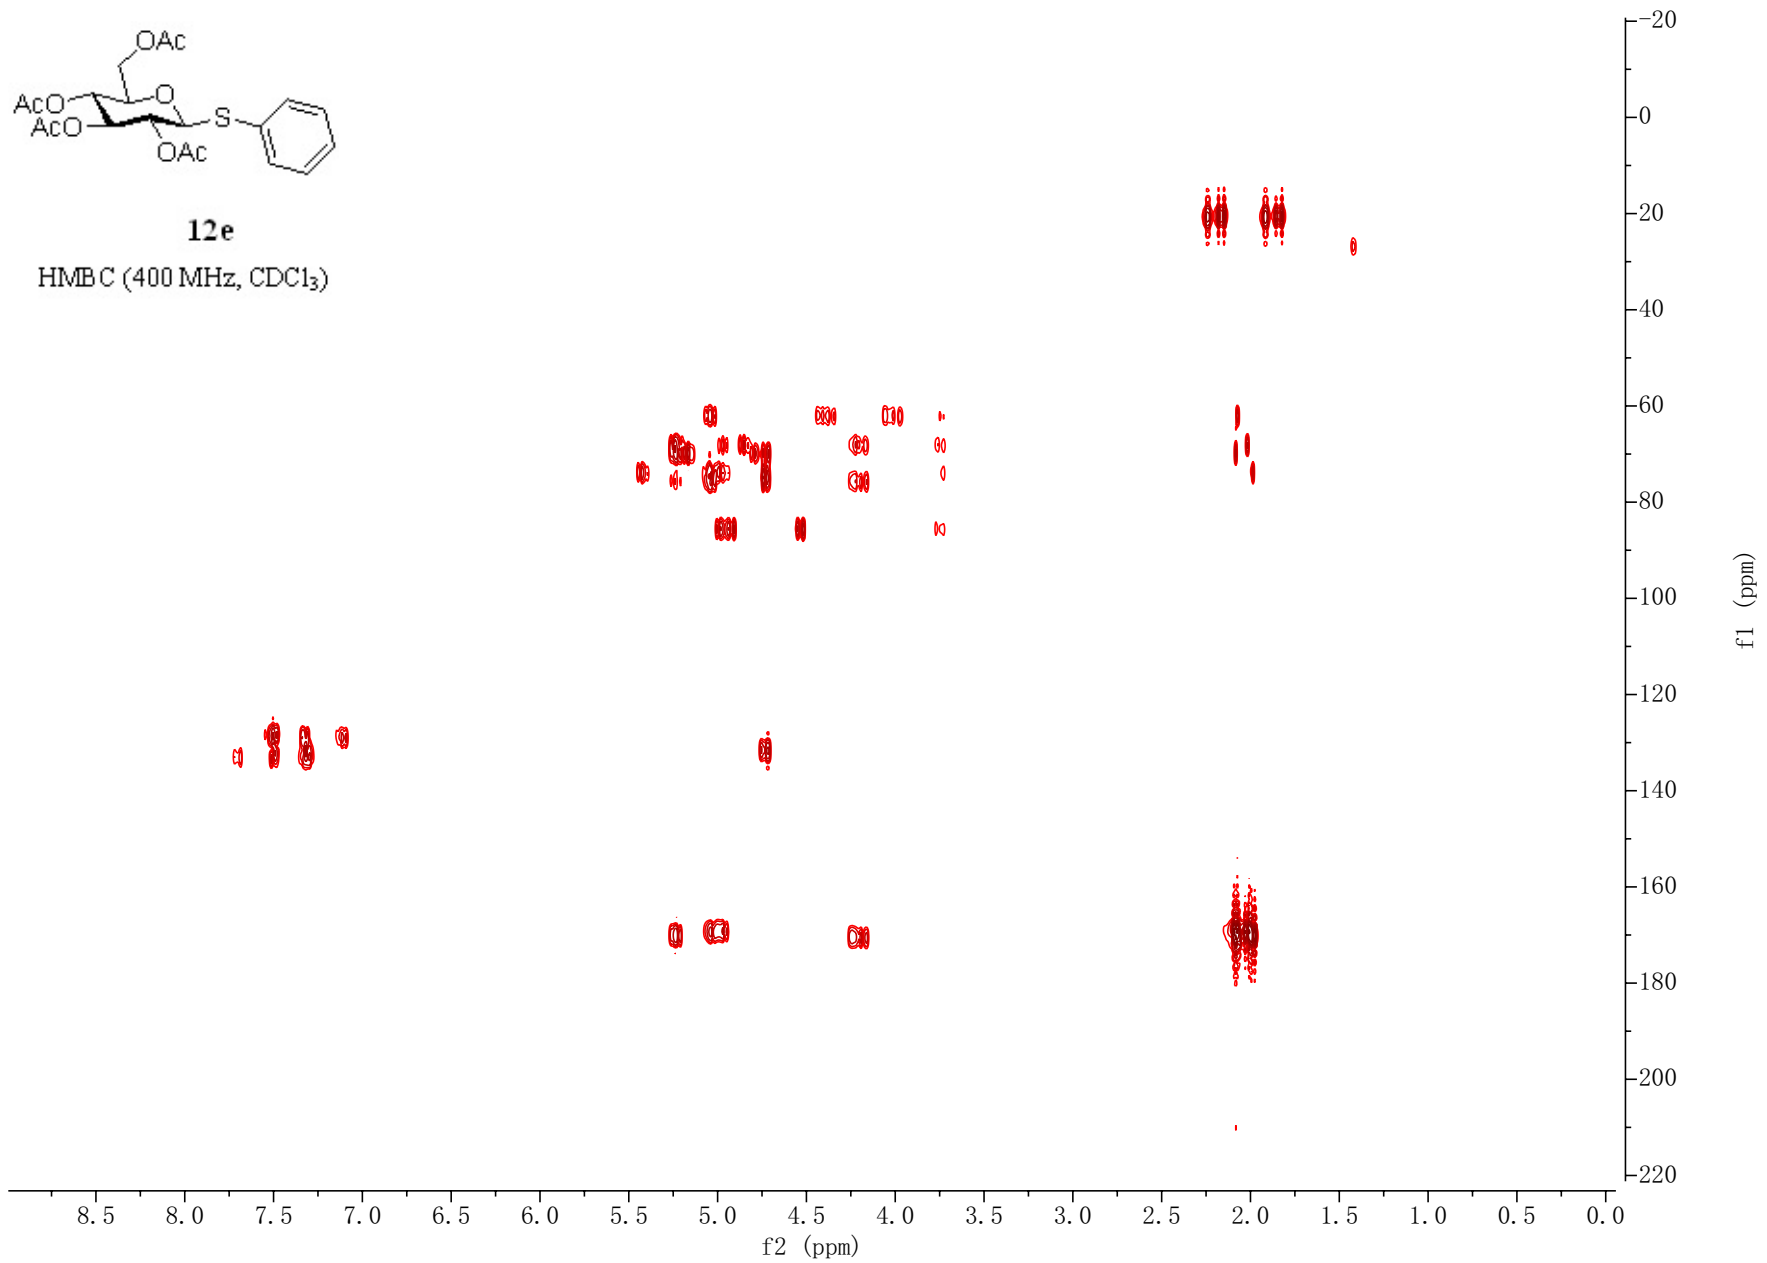

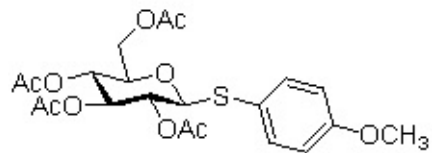

**12f**

<sup>1</sup>H NMR (600 MHz, CDCl<sub>3</sub>)

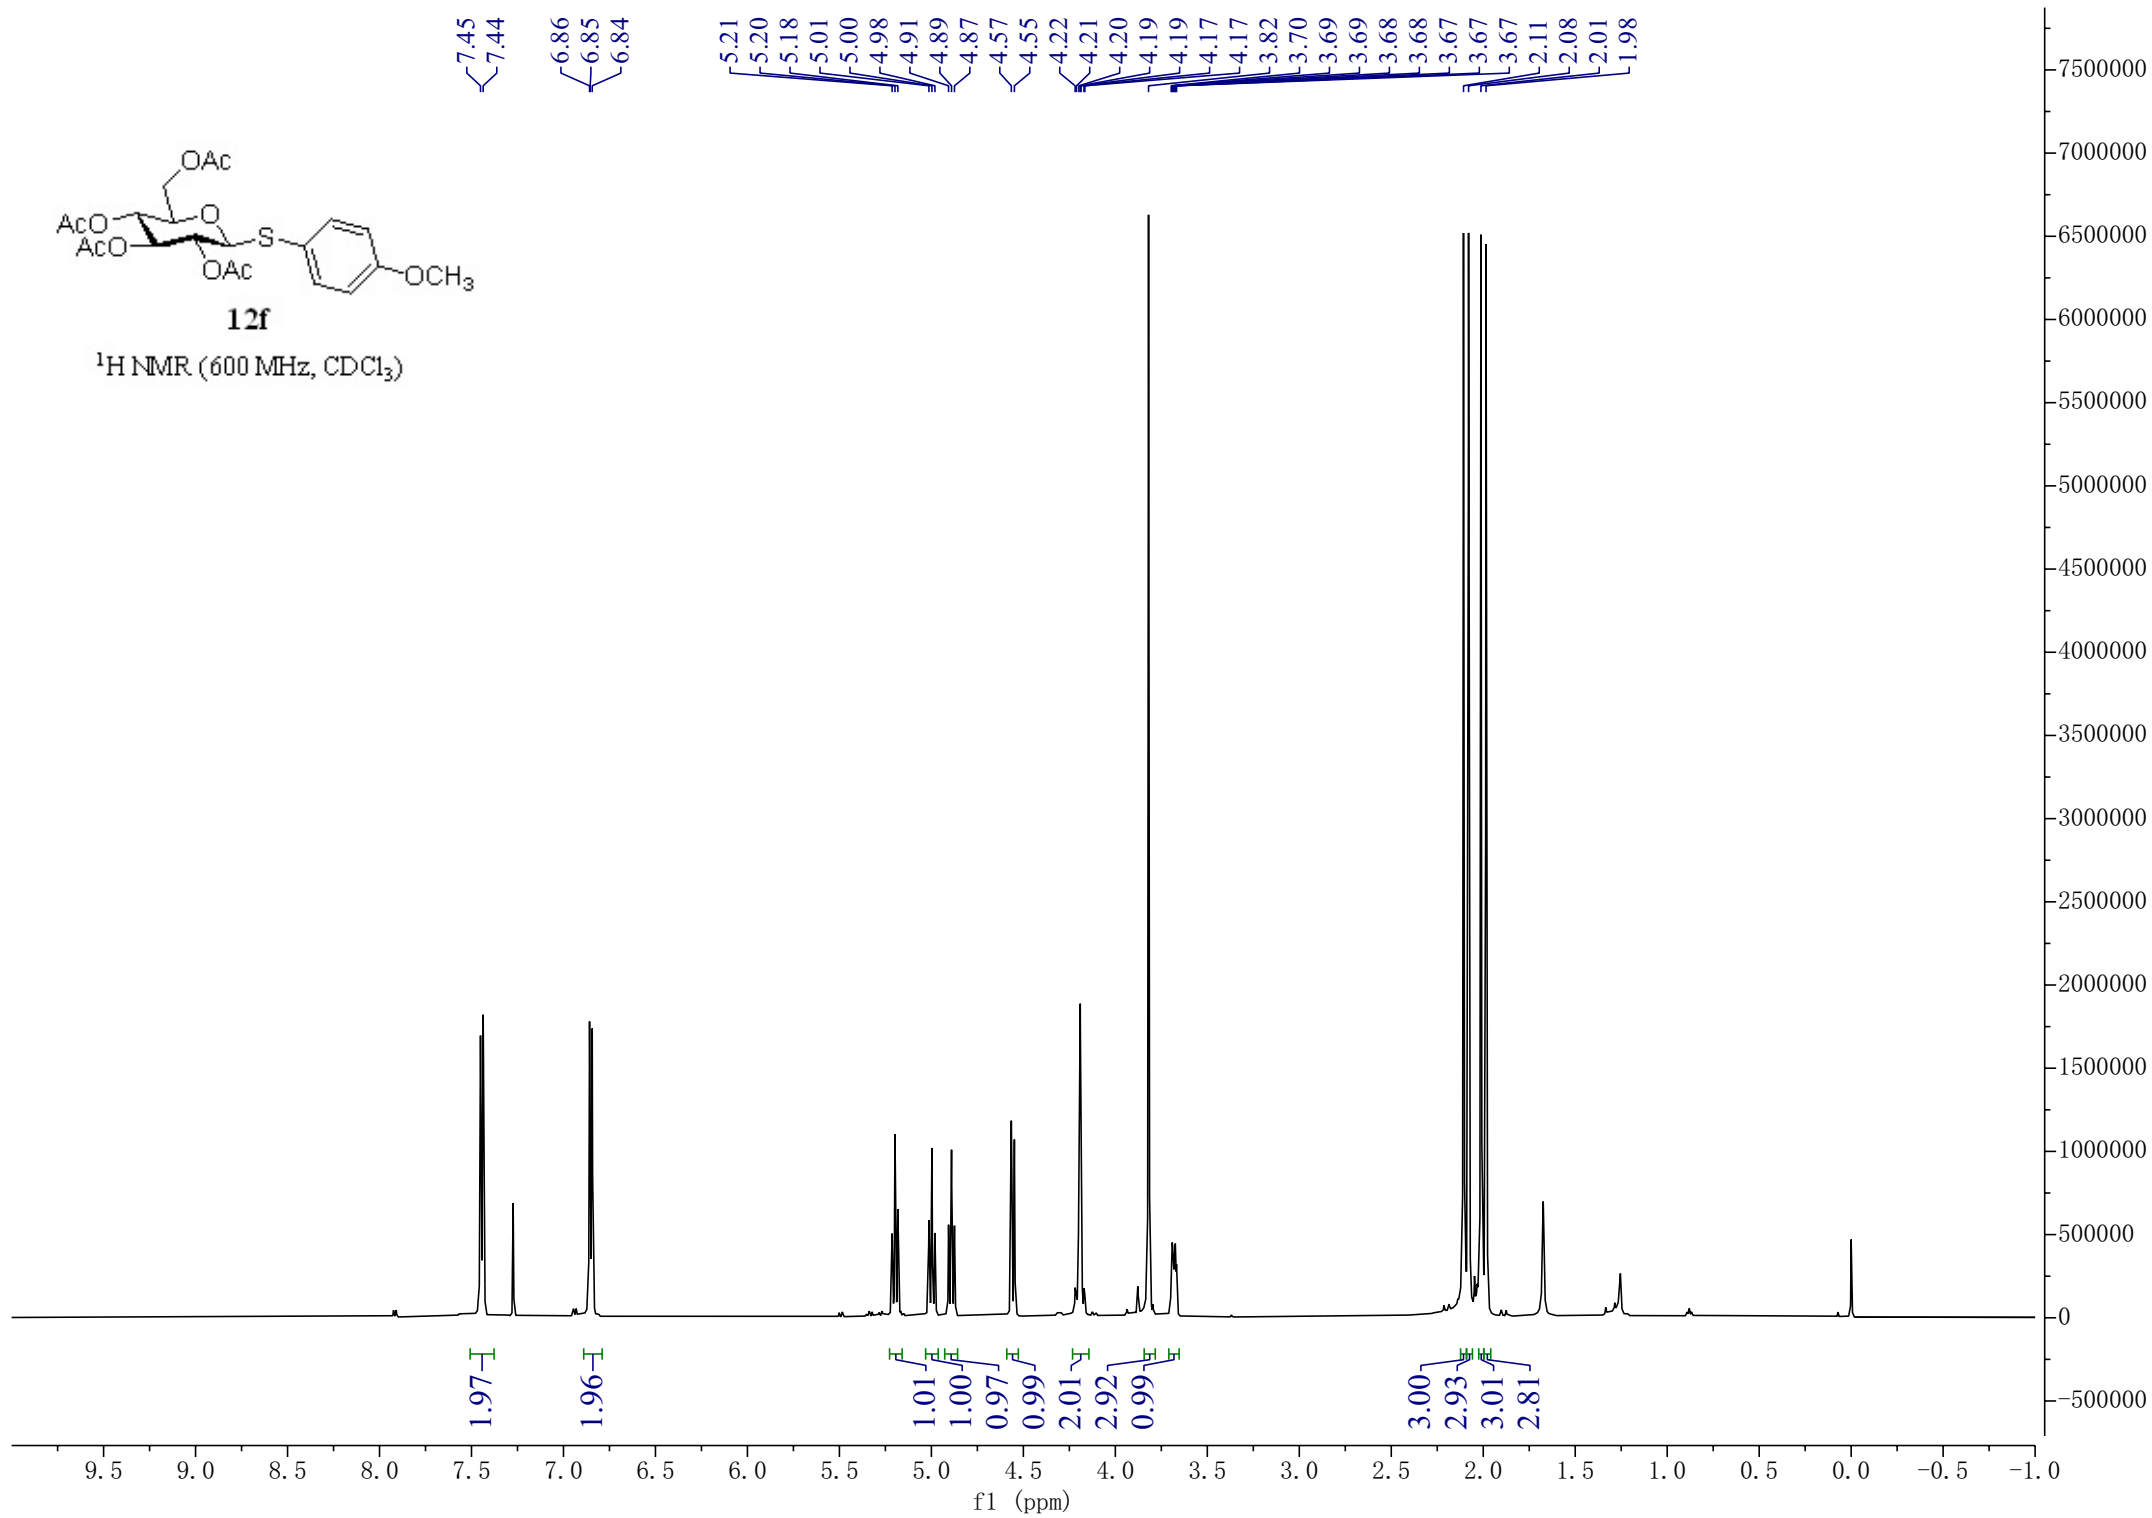

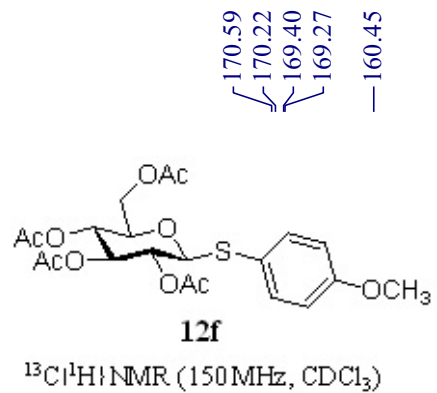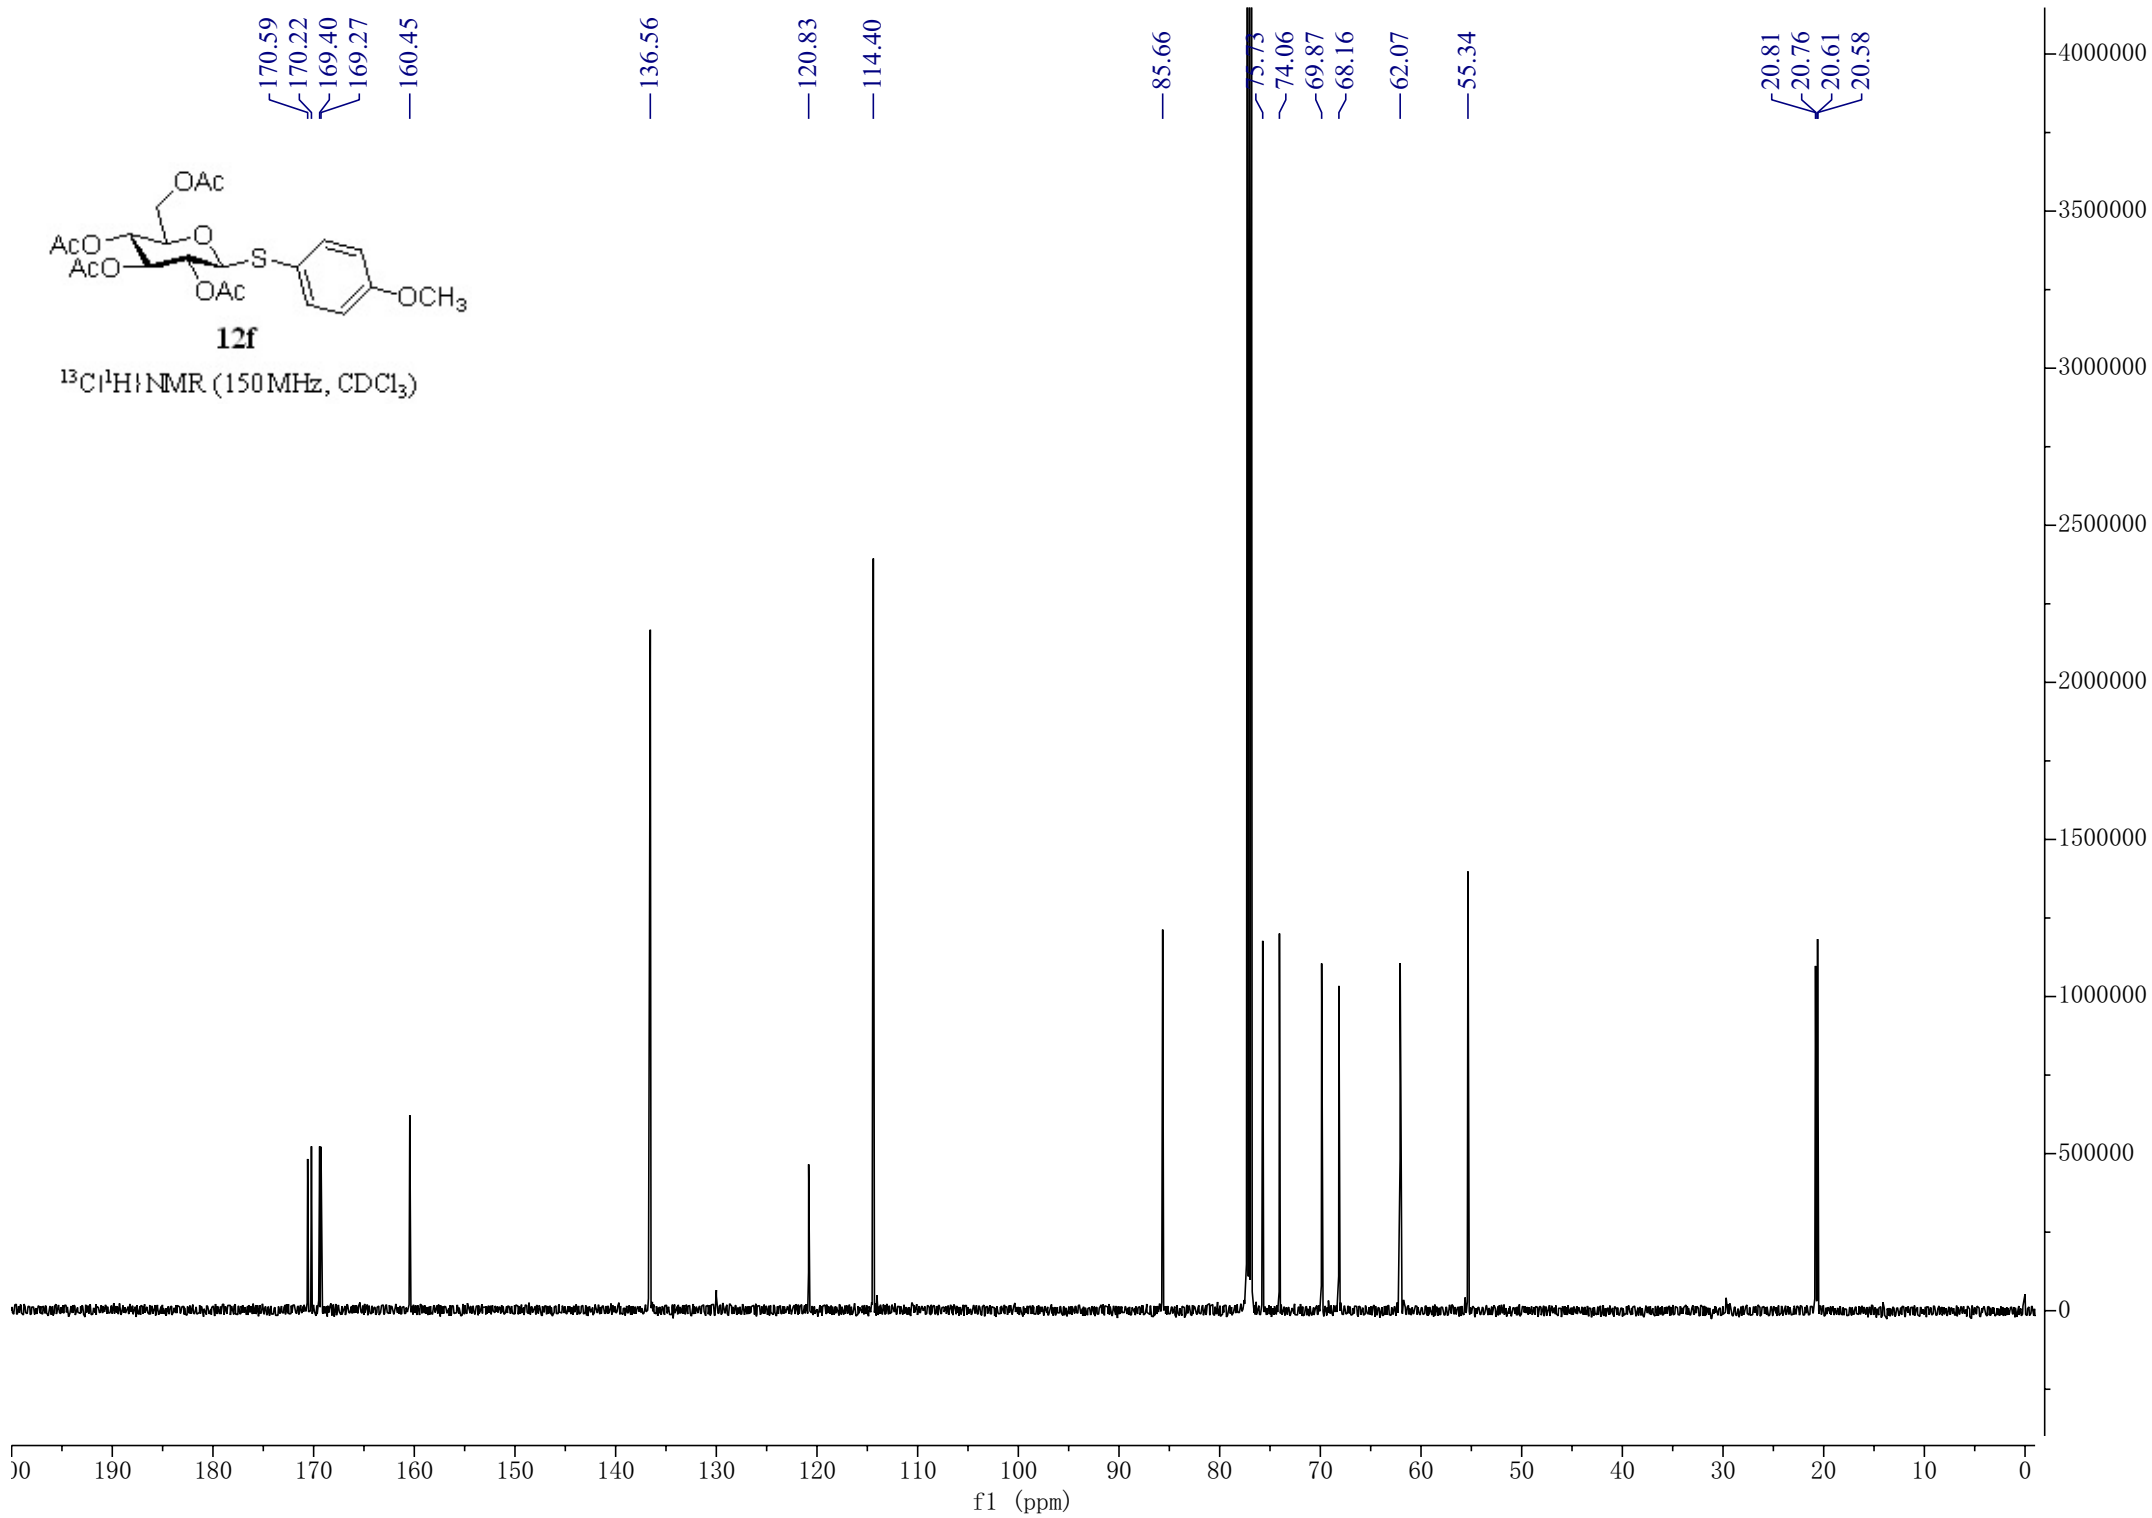

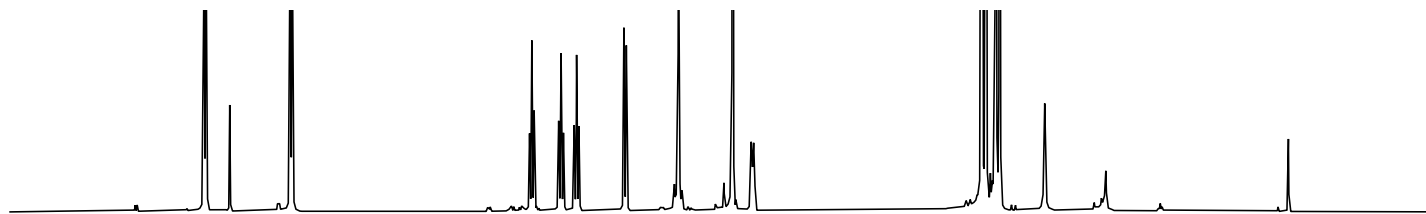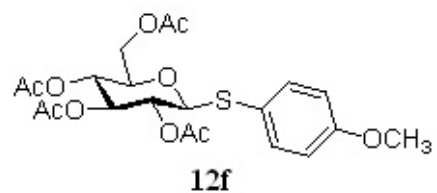

<sup>1</sup>H-<sup>1</sup>H COSY (600 MHz, CDCl<sub>3</sub>)

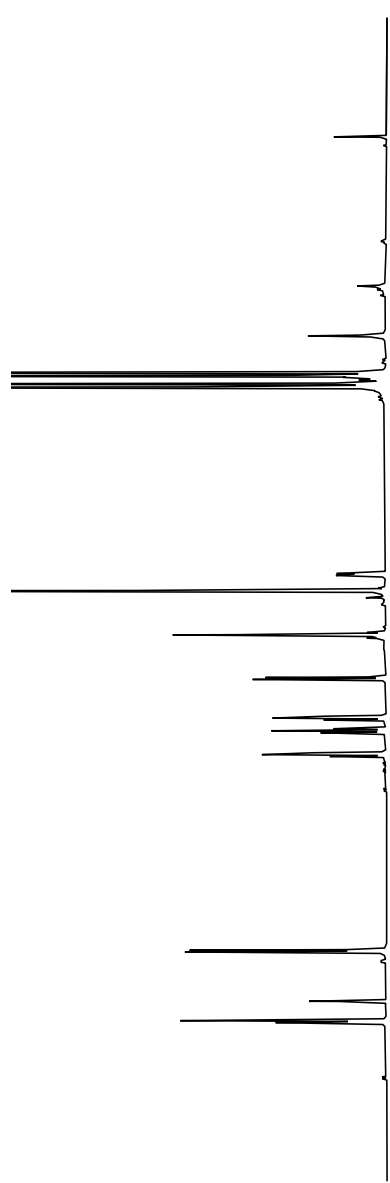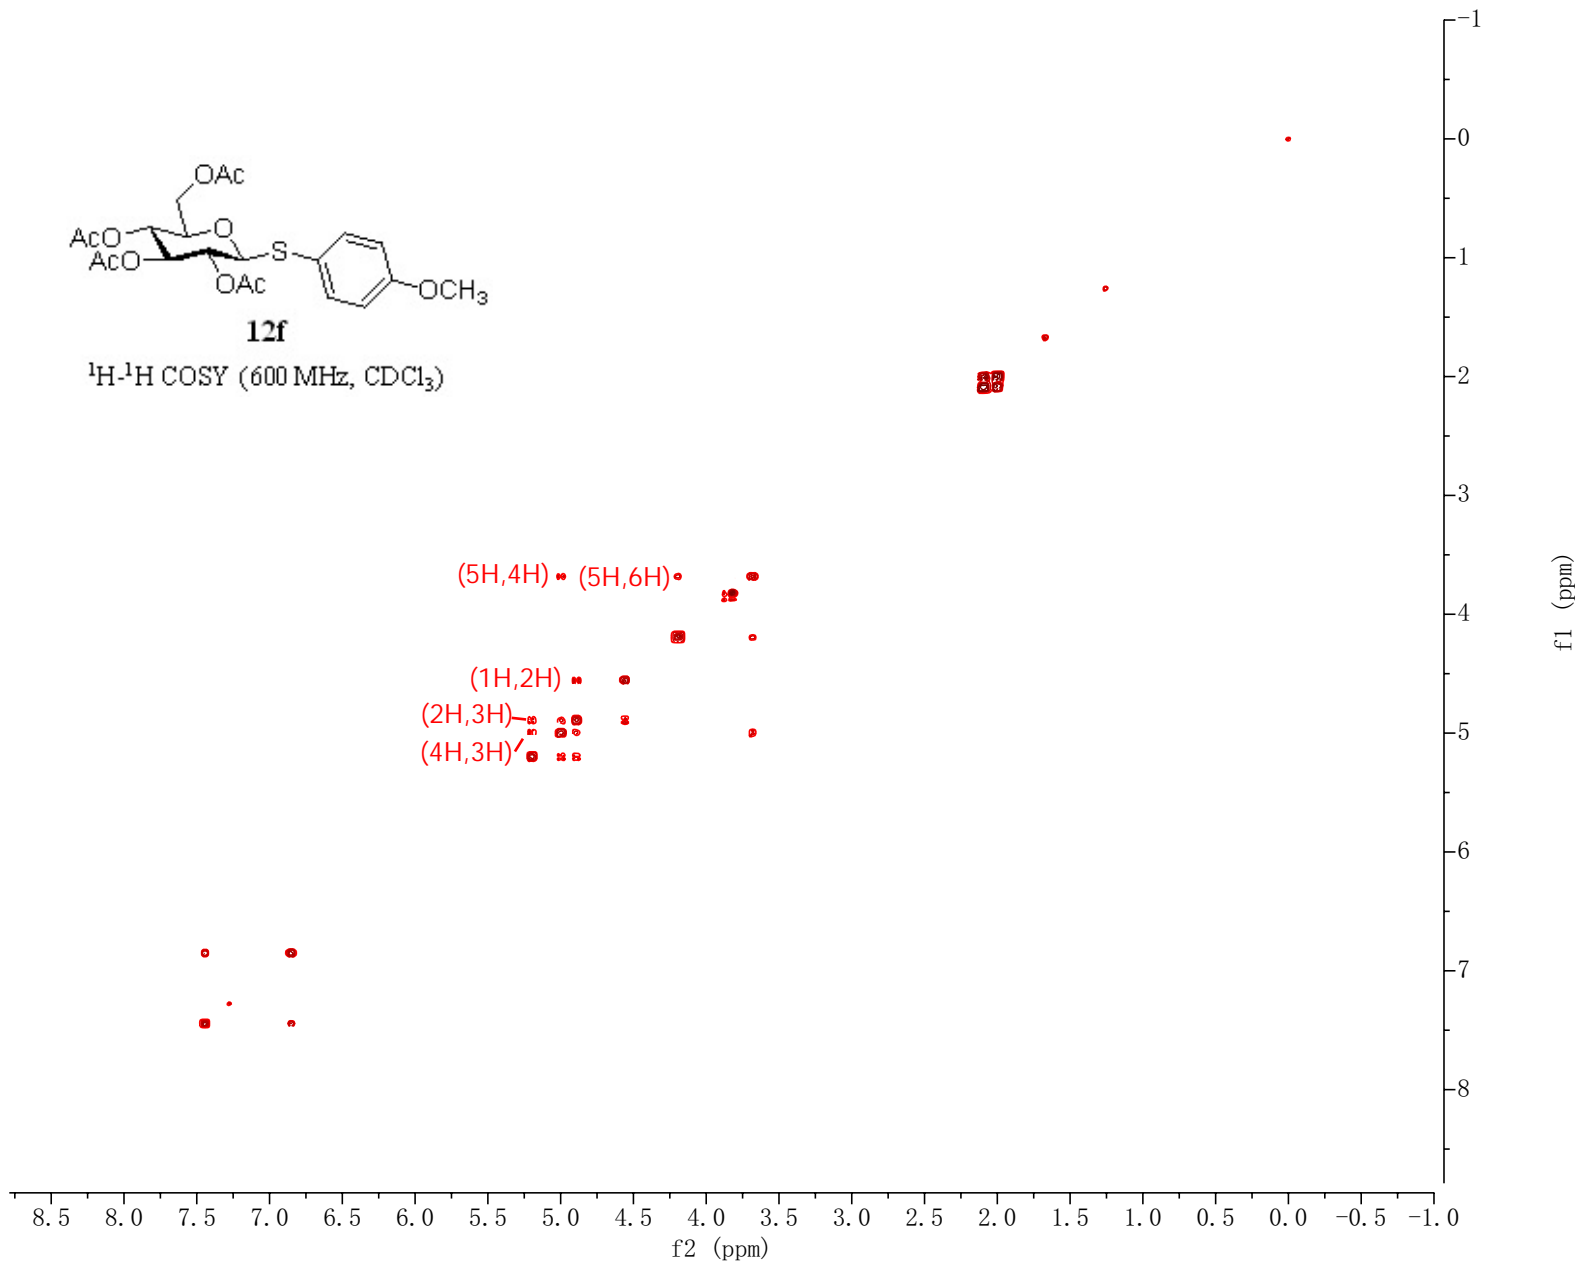

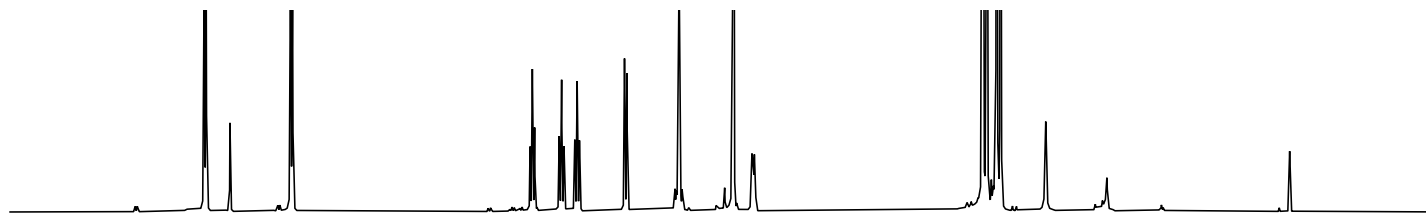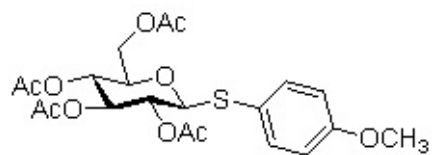

**12f**

HSQC (600MHz, CDCl<sub>3</sub>)

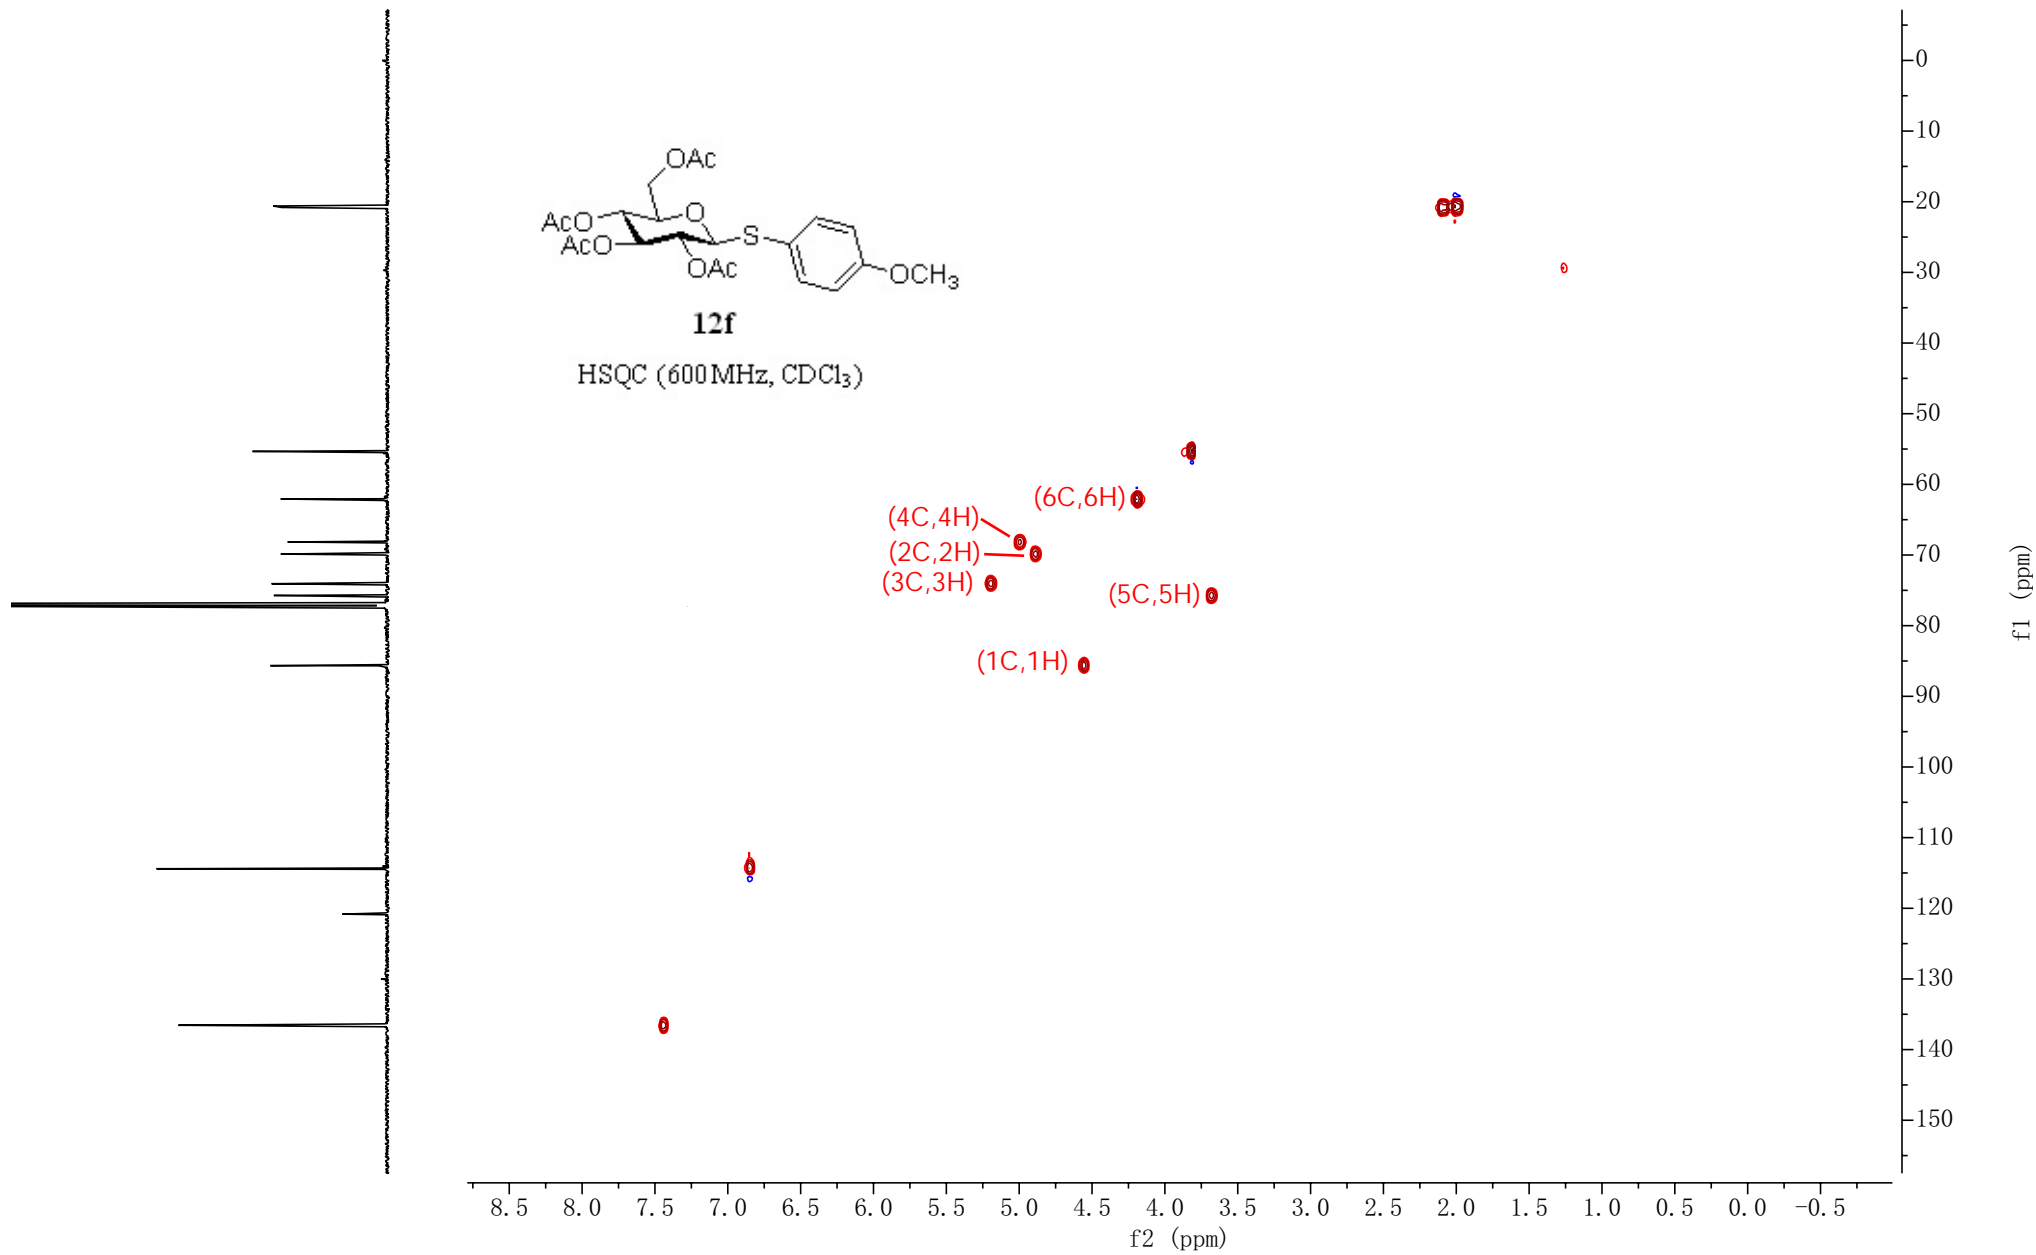

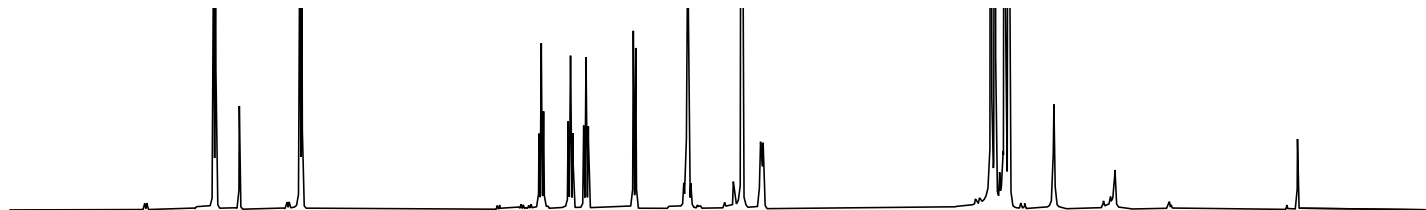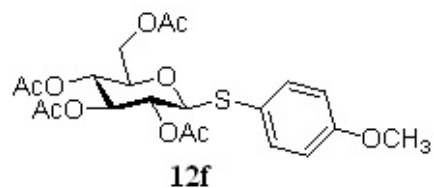

HMBC (600 MHz, CDCl<sub>3</sub>)

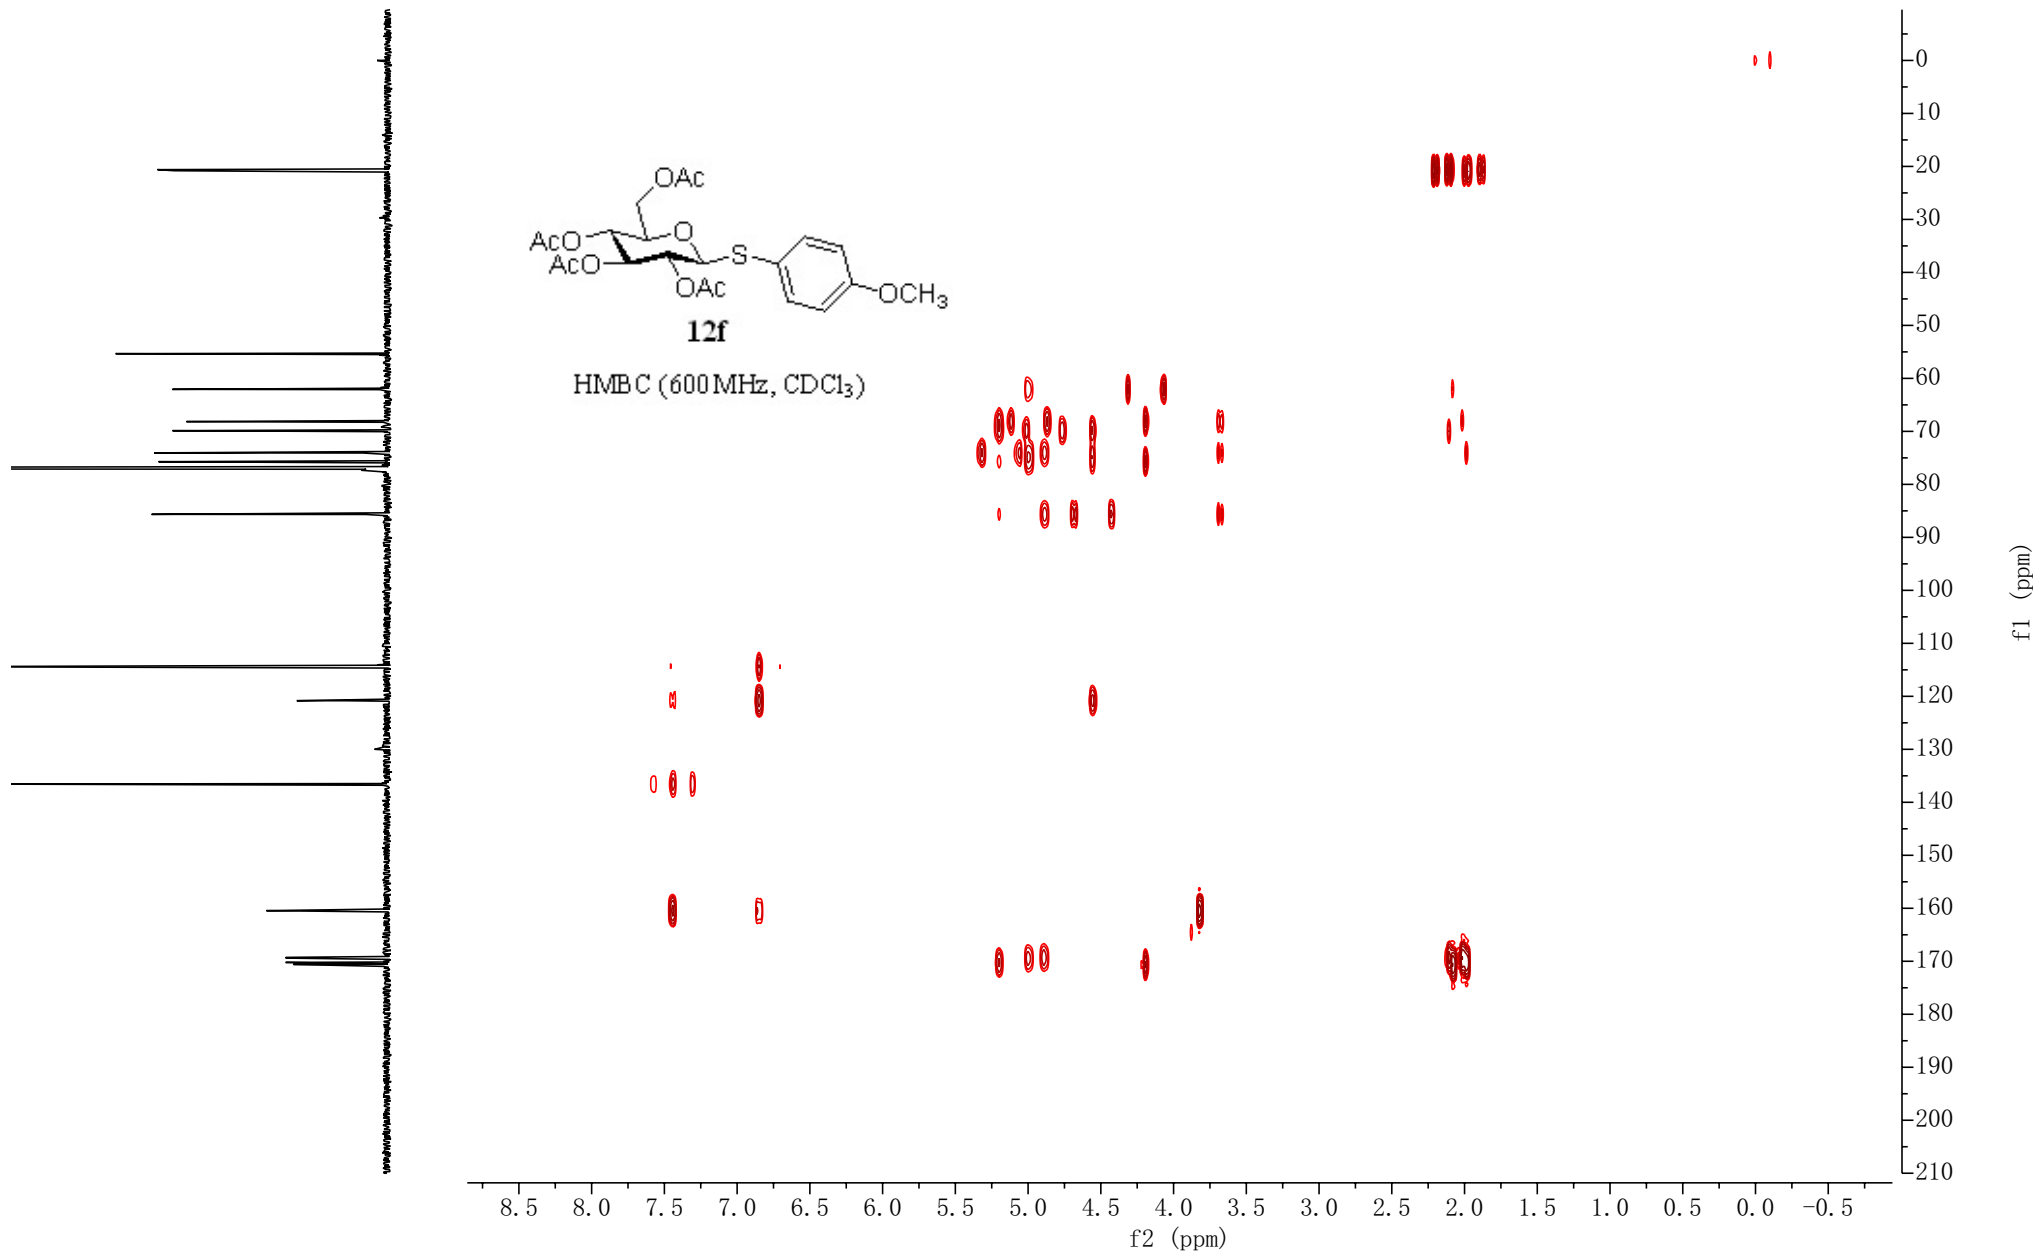

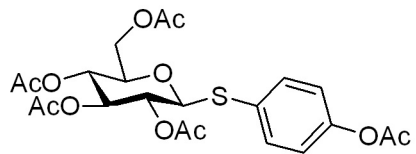

**12g**

<sup>1</sup>H NMR (400 MHz, CDCl<sub>3</sub>)

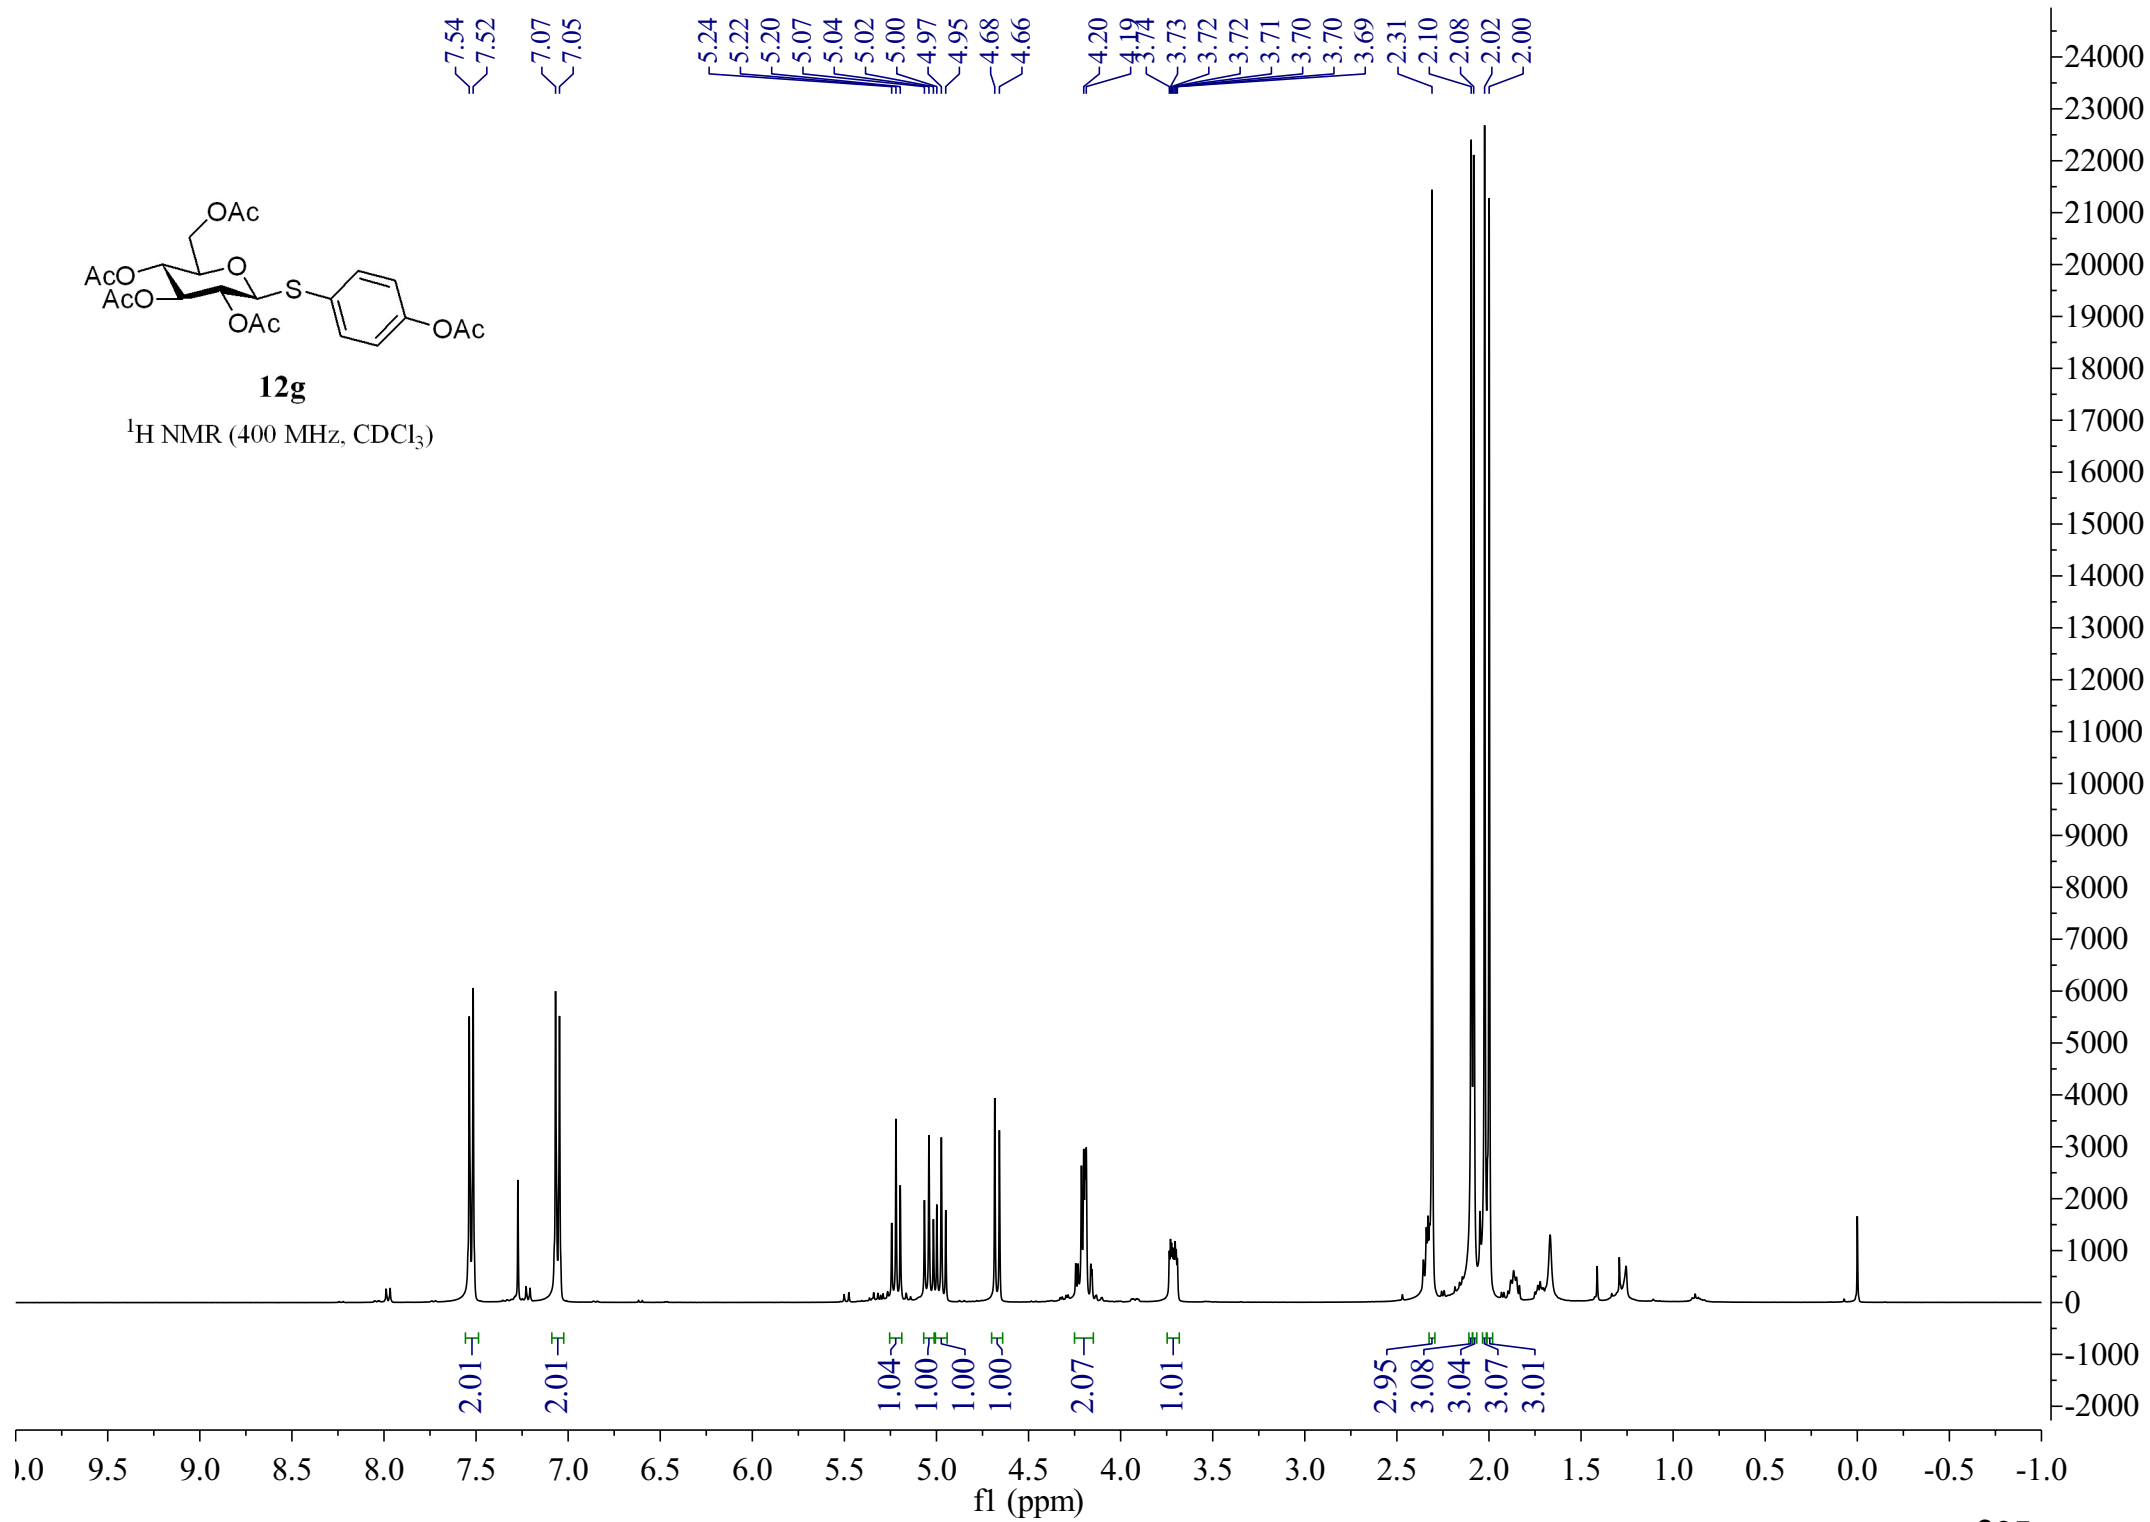

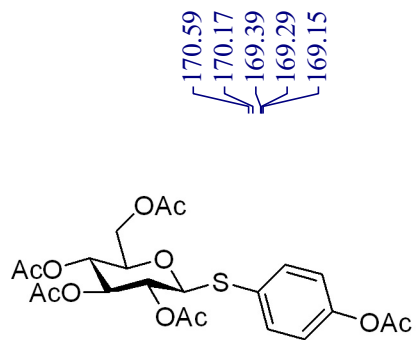

**12g**

$^{13}\text{C}\{^1\text{H}\}$  NMR (100 MHz,  $\text{CDCl}_3$ )

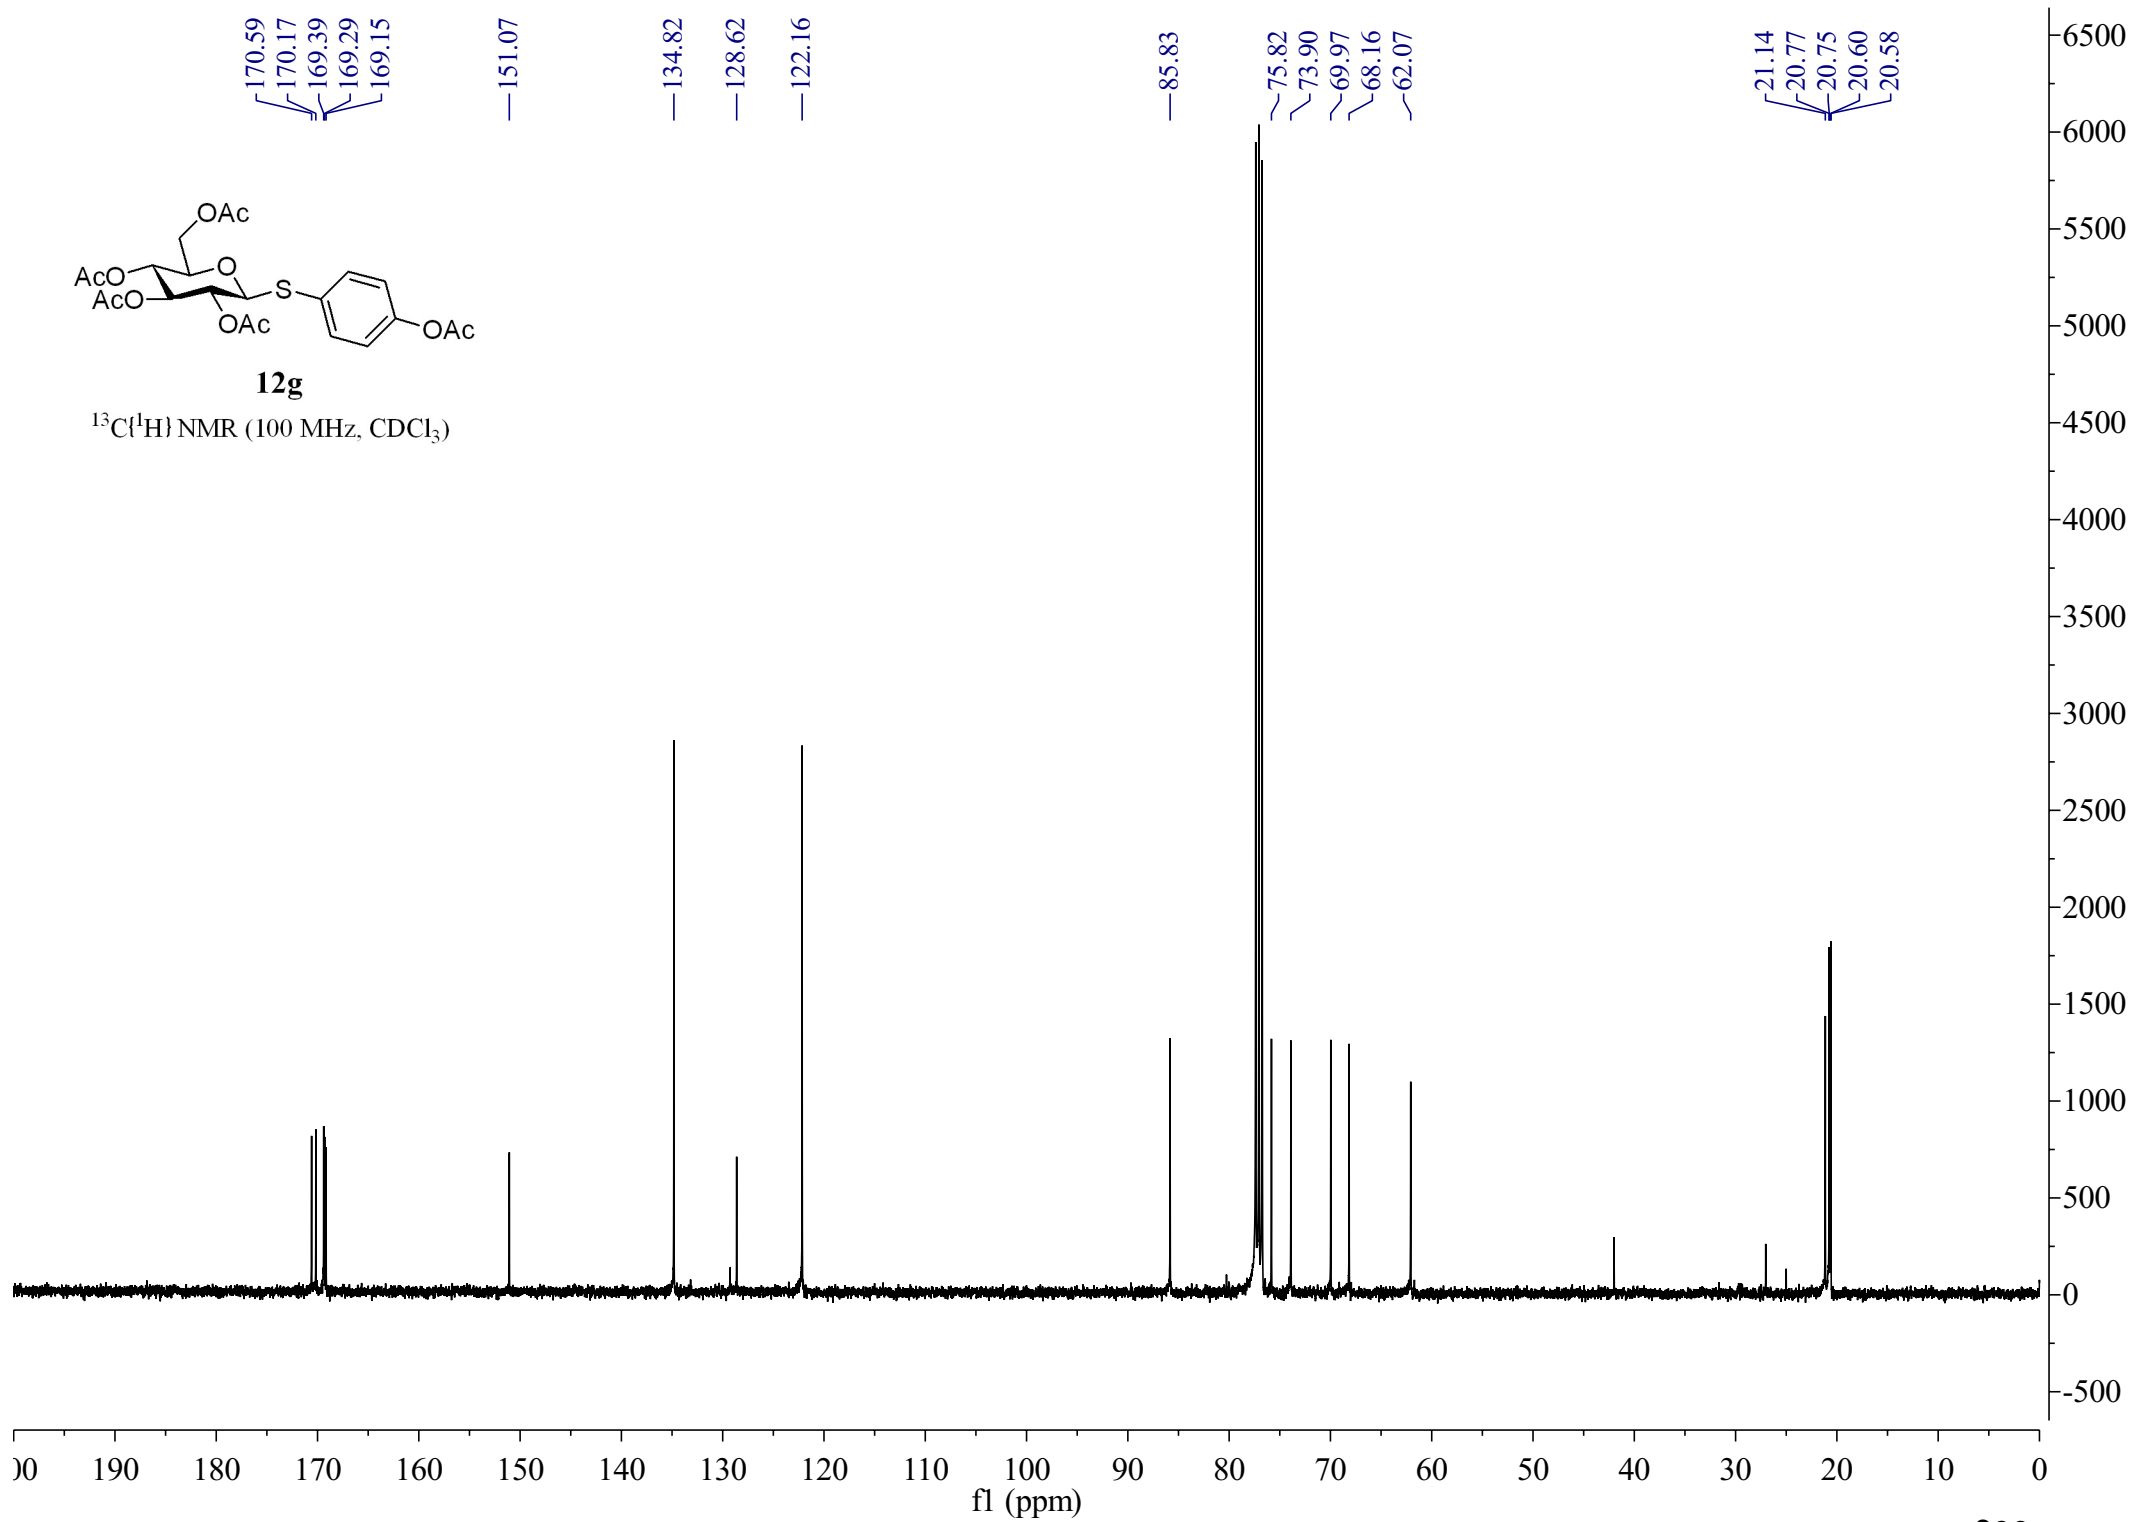



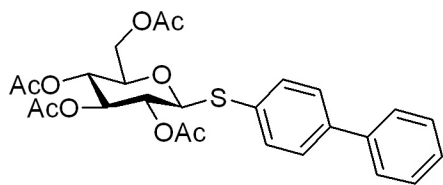

**12h**

$^1\text{H NMR}$  (400 MHz,  $\text{CDCl}_3$ )

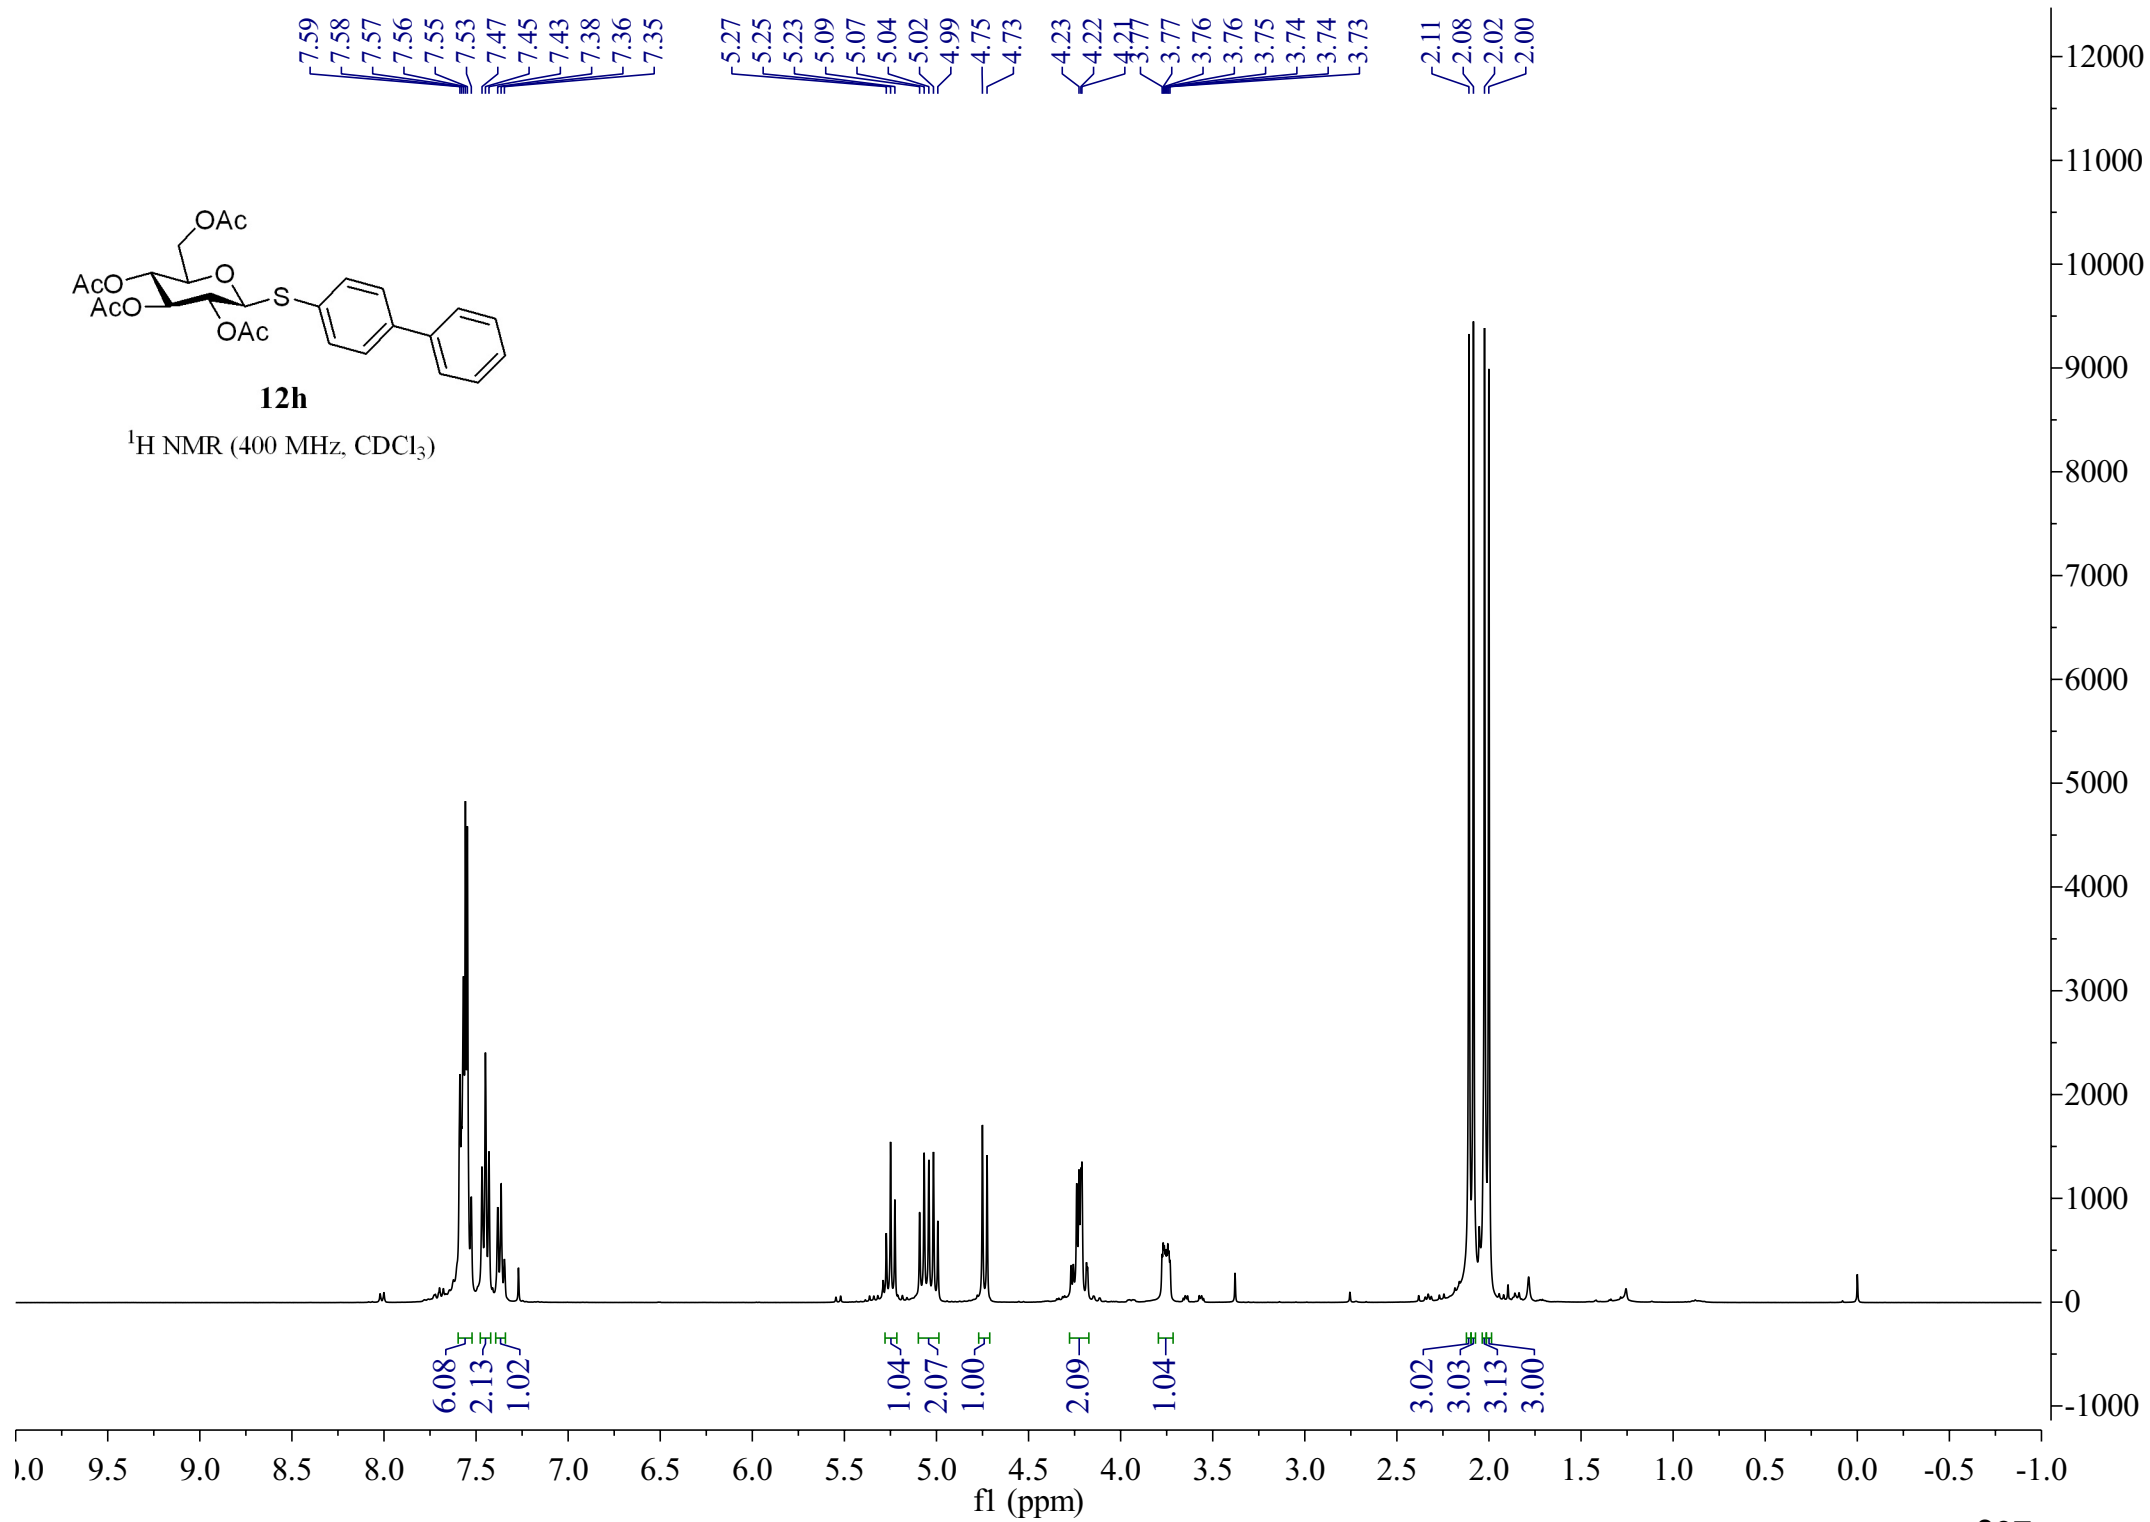

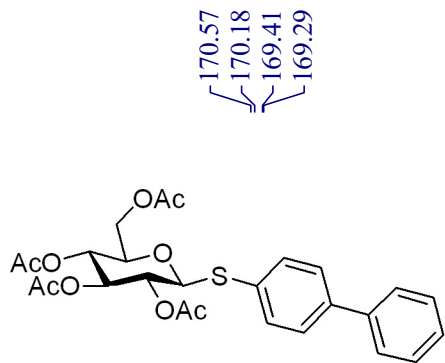

**12h**

$^{13}\text{C}\{^1\text{H}\}$  NMR (100 MHz,  $\text{CDCl}_3$ )

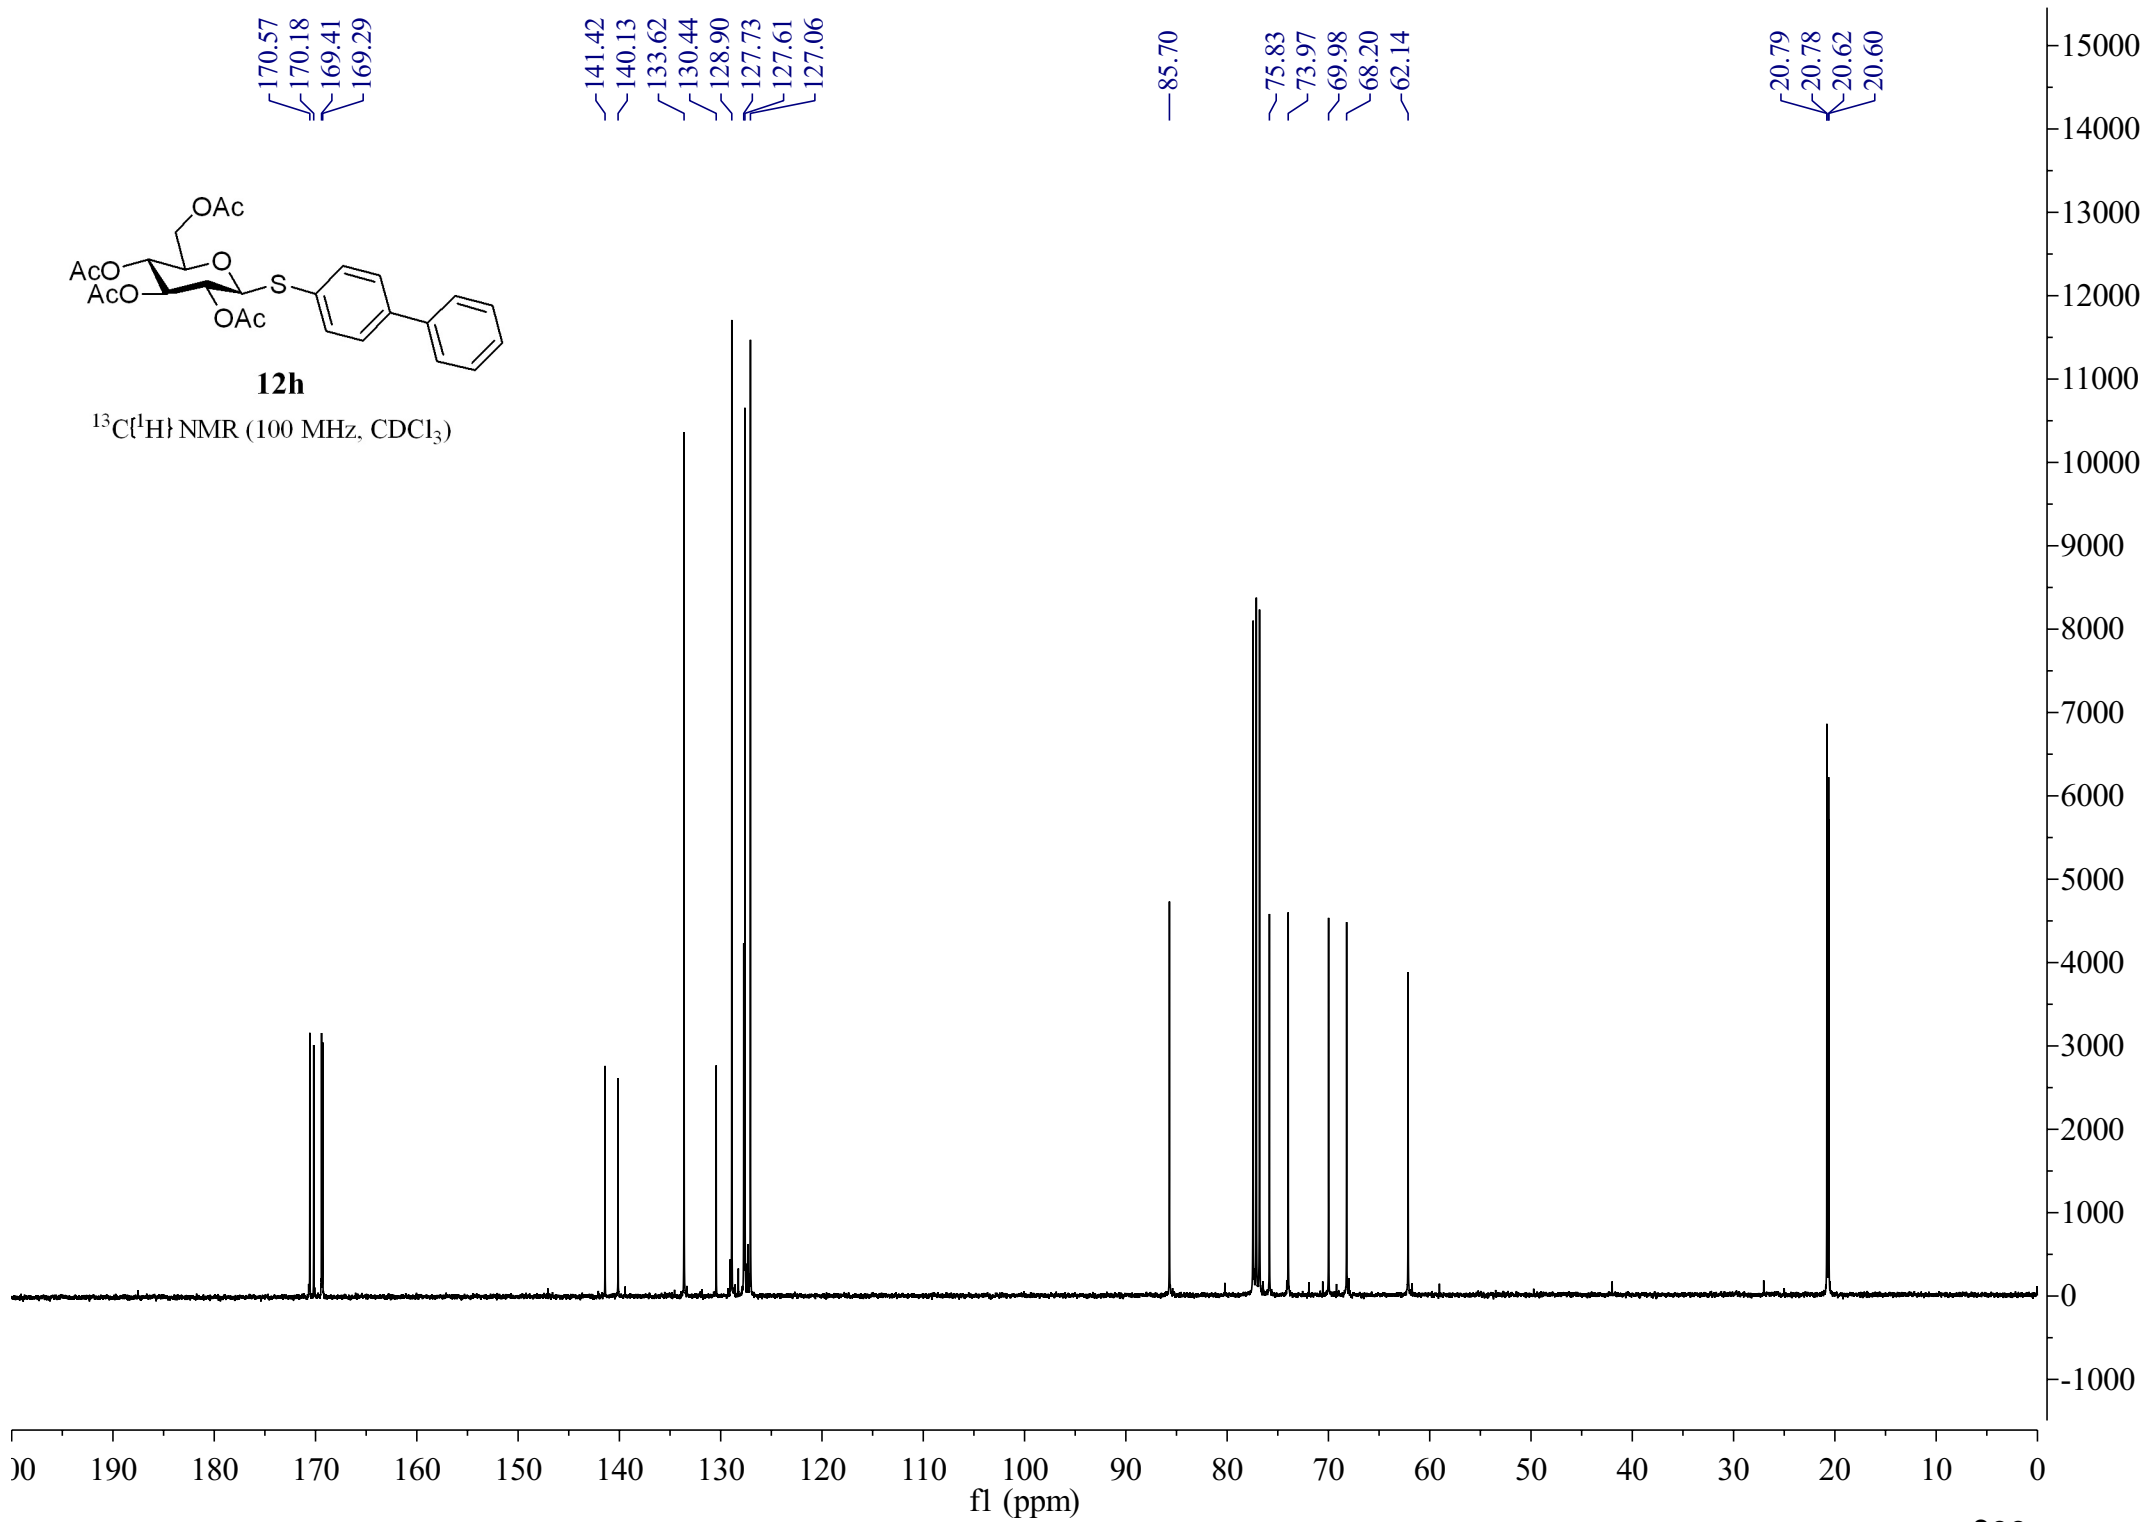

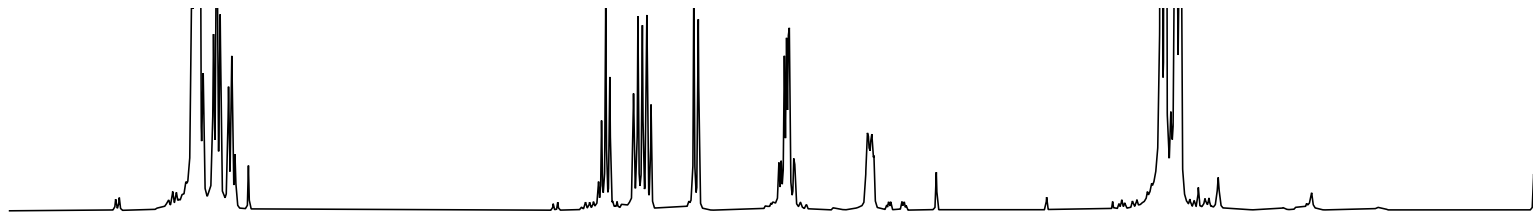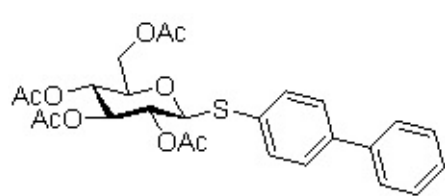

**12h**

<sup>1</sup>H-<sup>1</sup>H COSY (400 MHz, CDCl<sub>3</sub>)

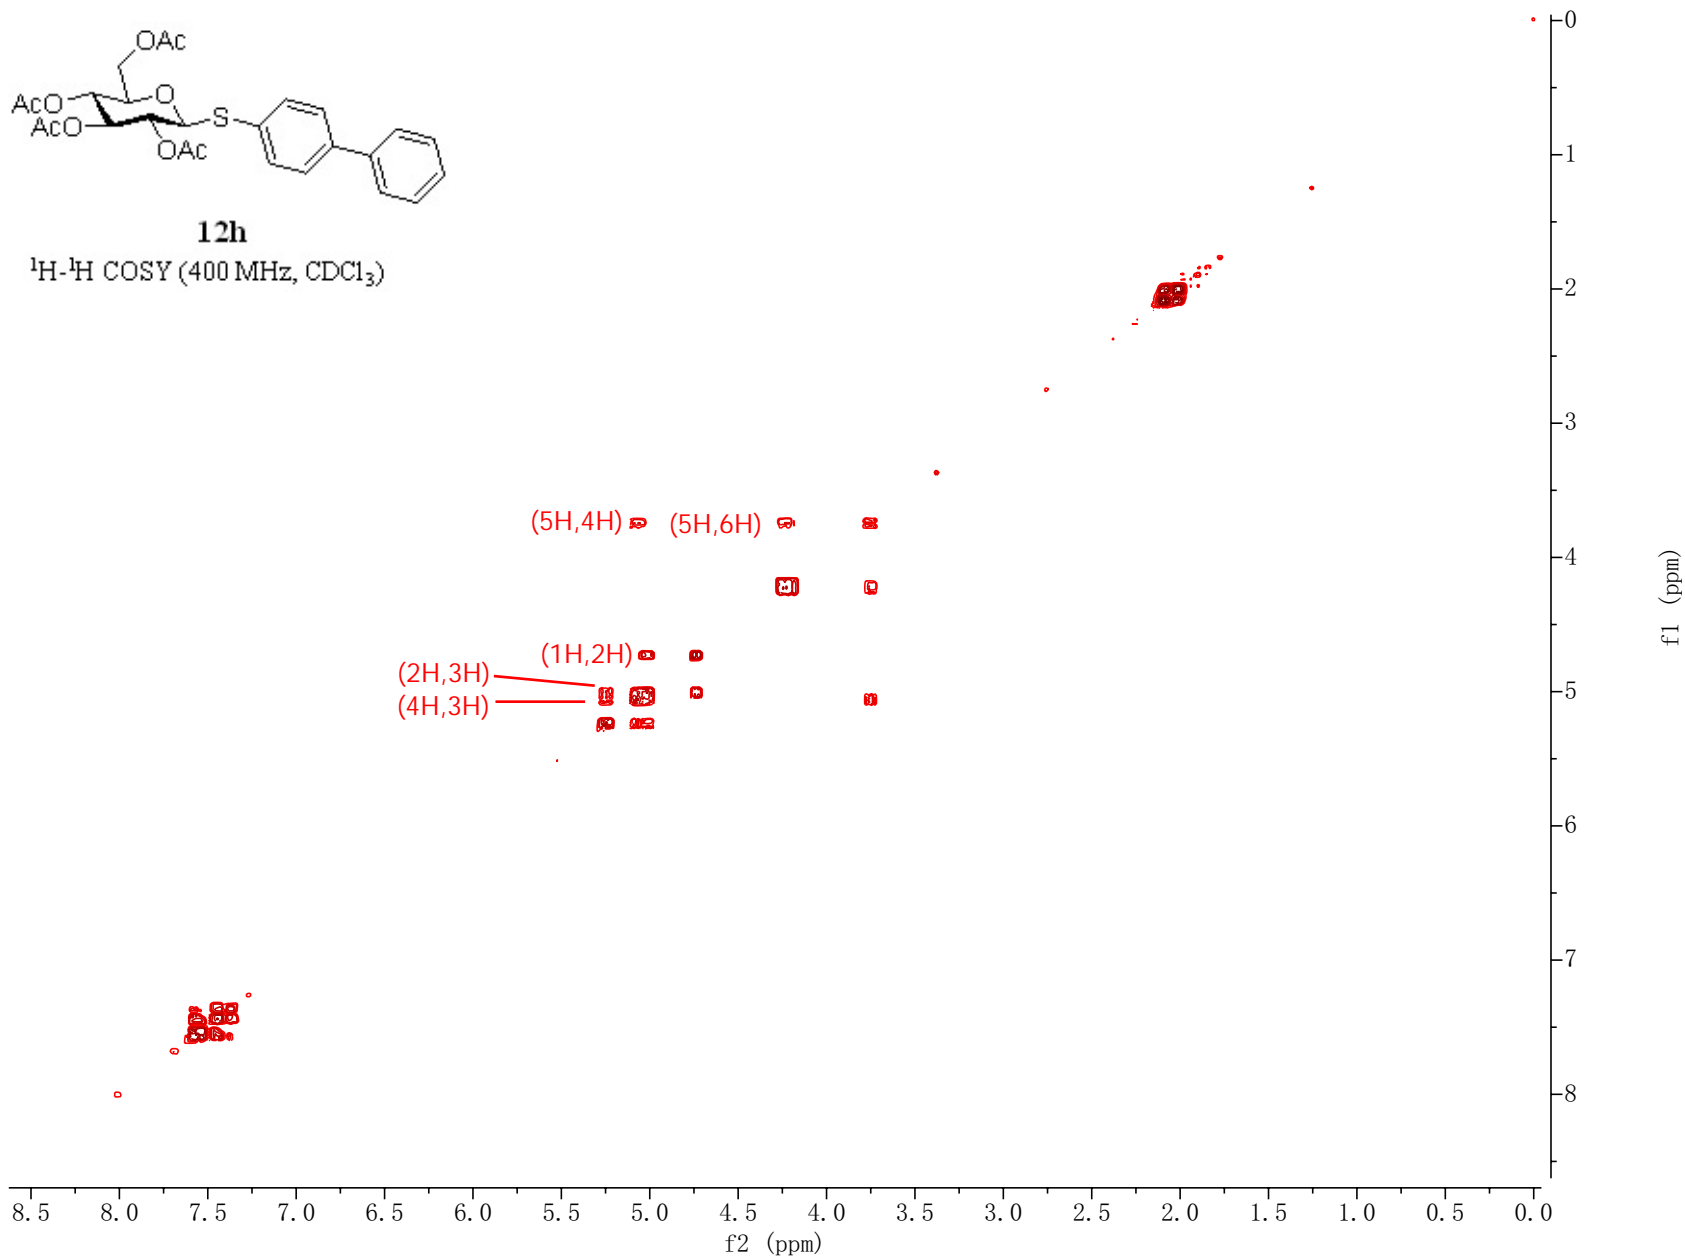

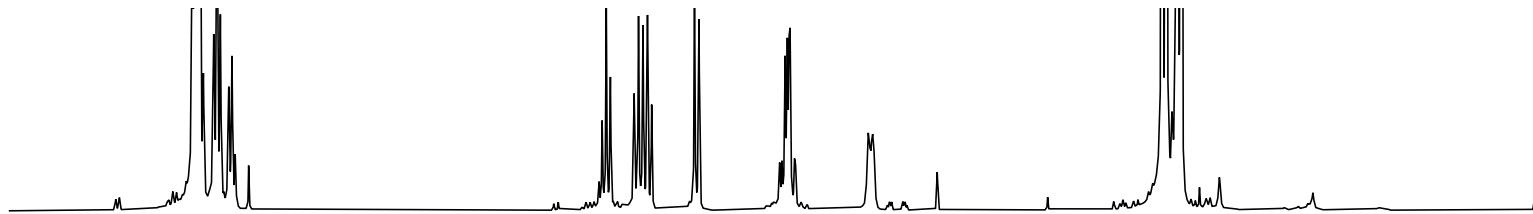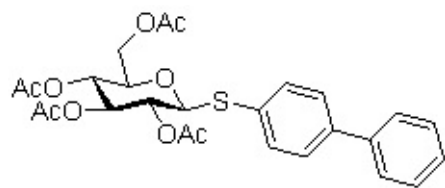

12h

HSQC (400 MHz, CDCl<sub>3</sub>)

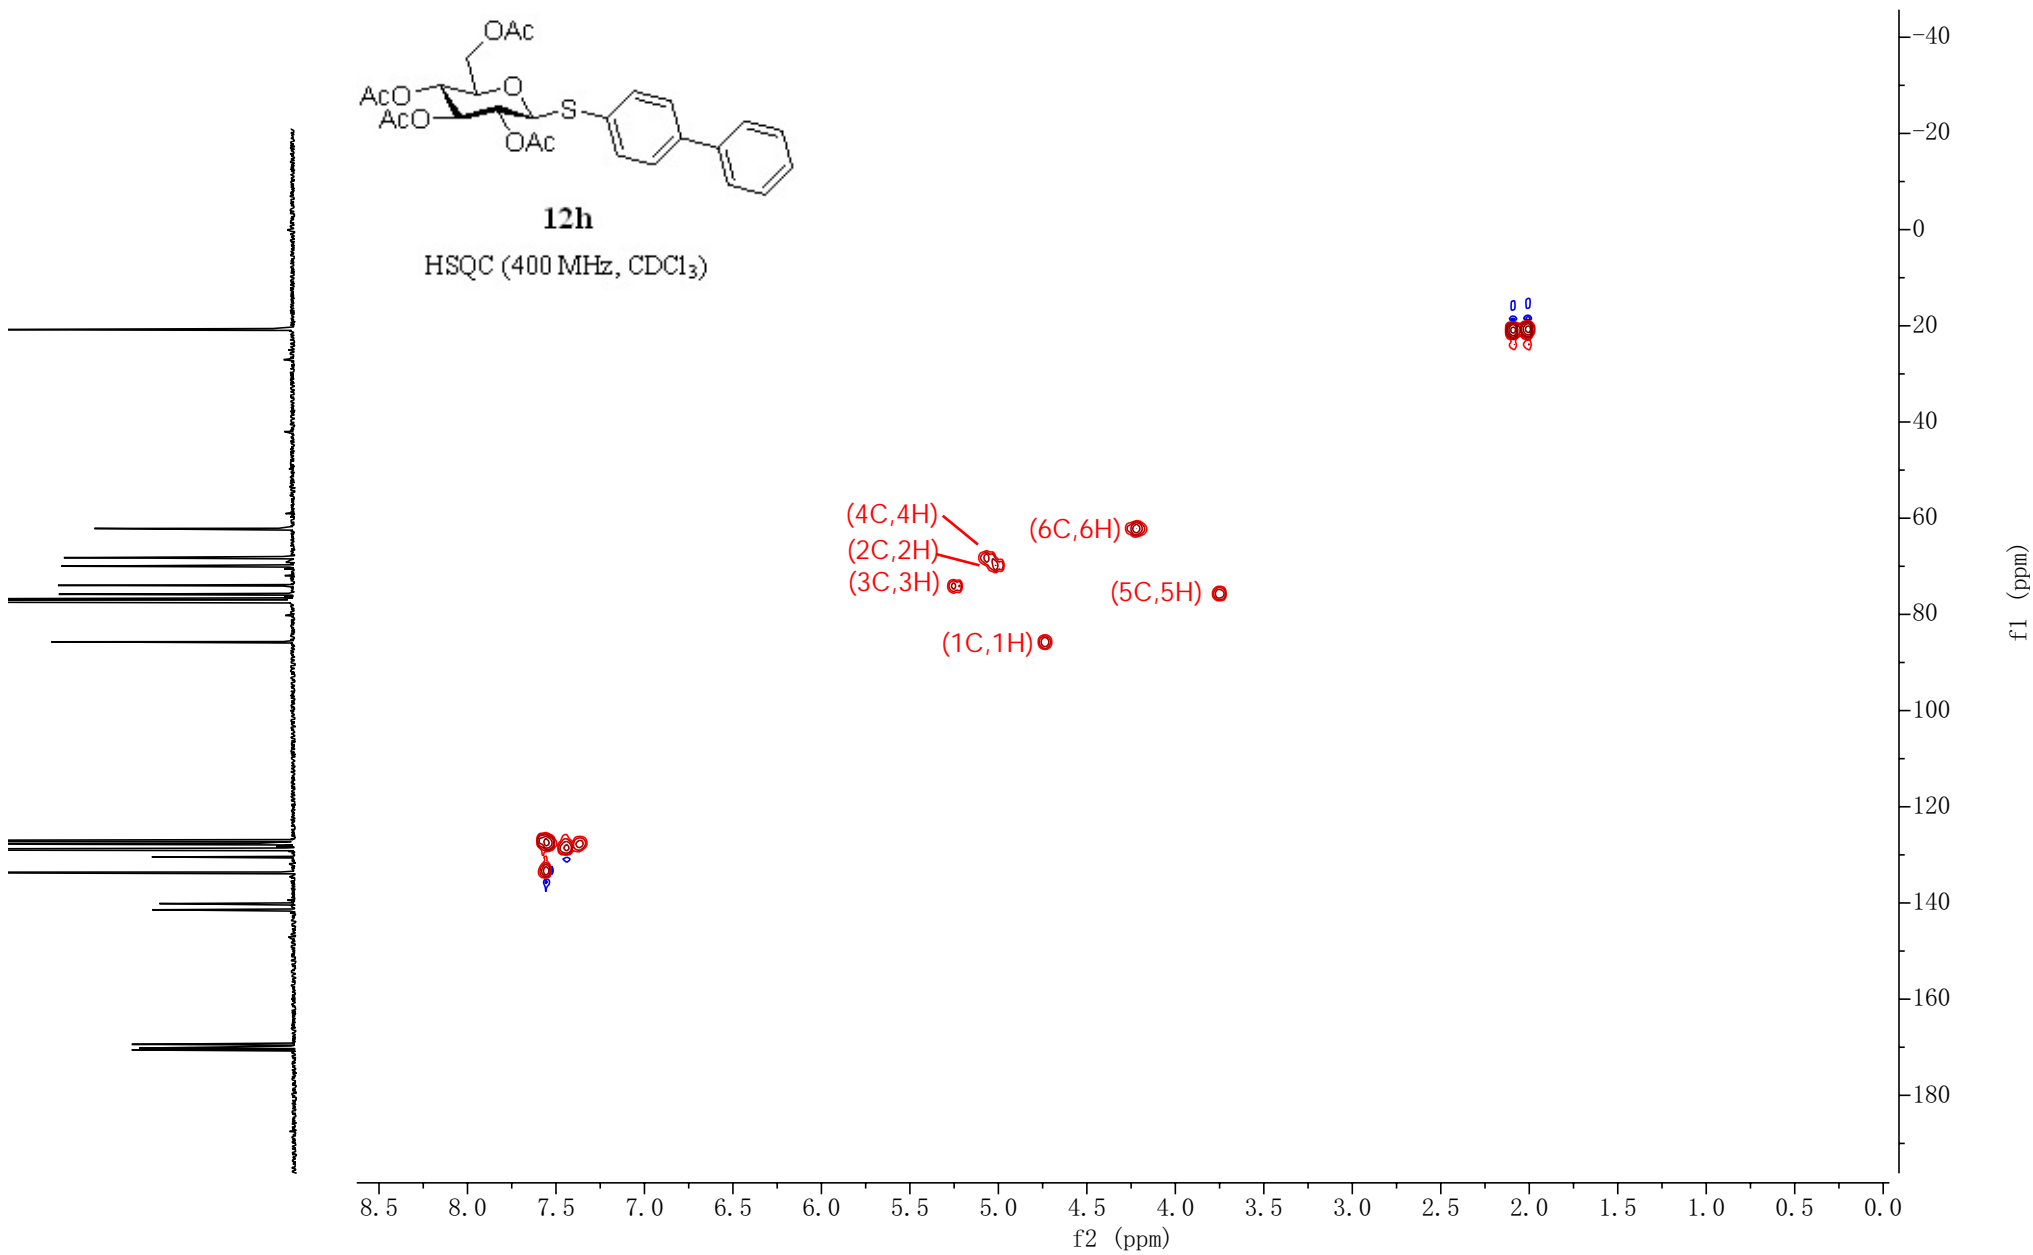

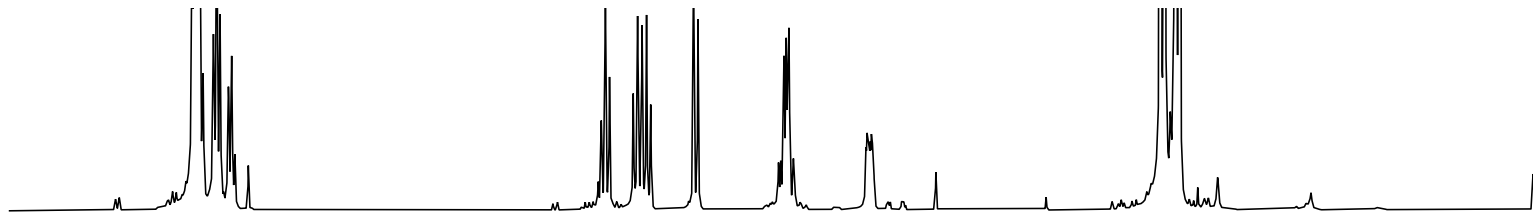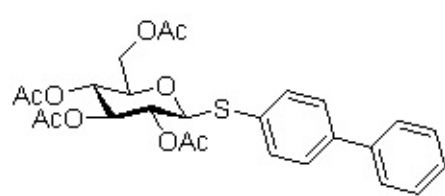

12h

HMBC (400 MHz, CDCl<sub>3</sub>)

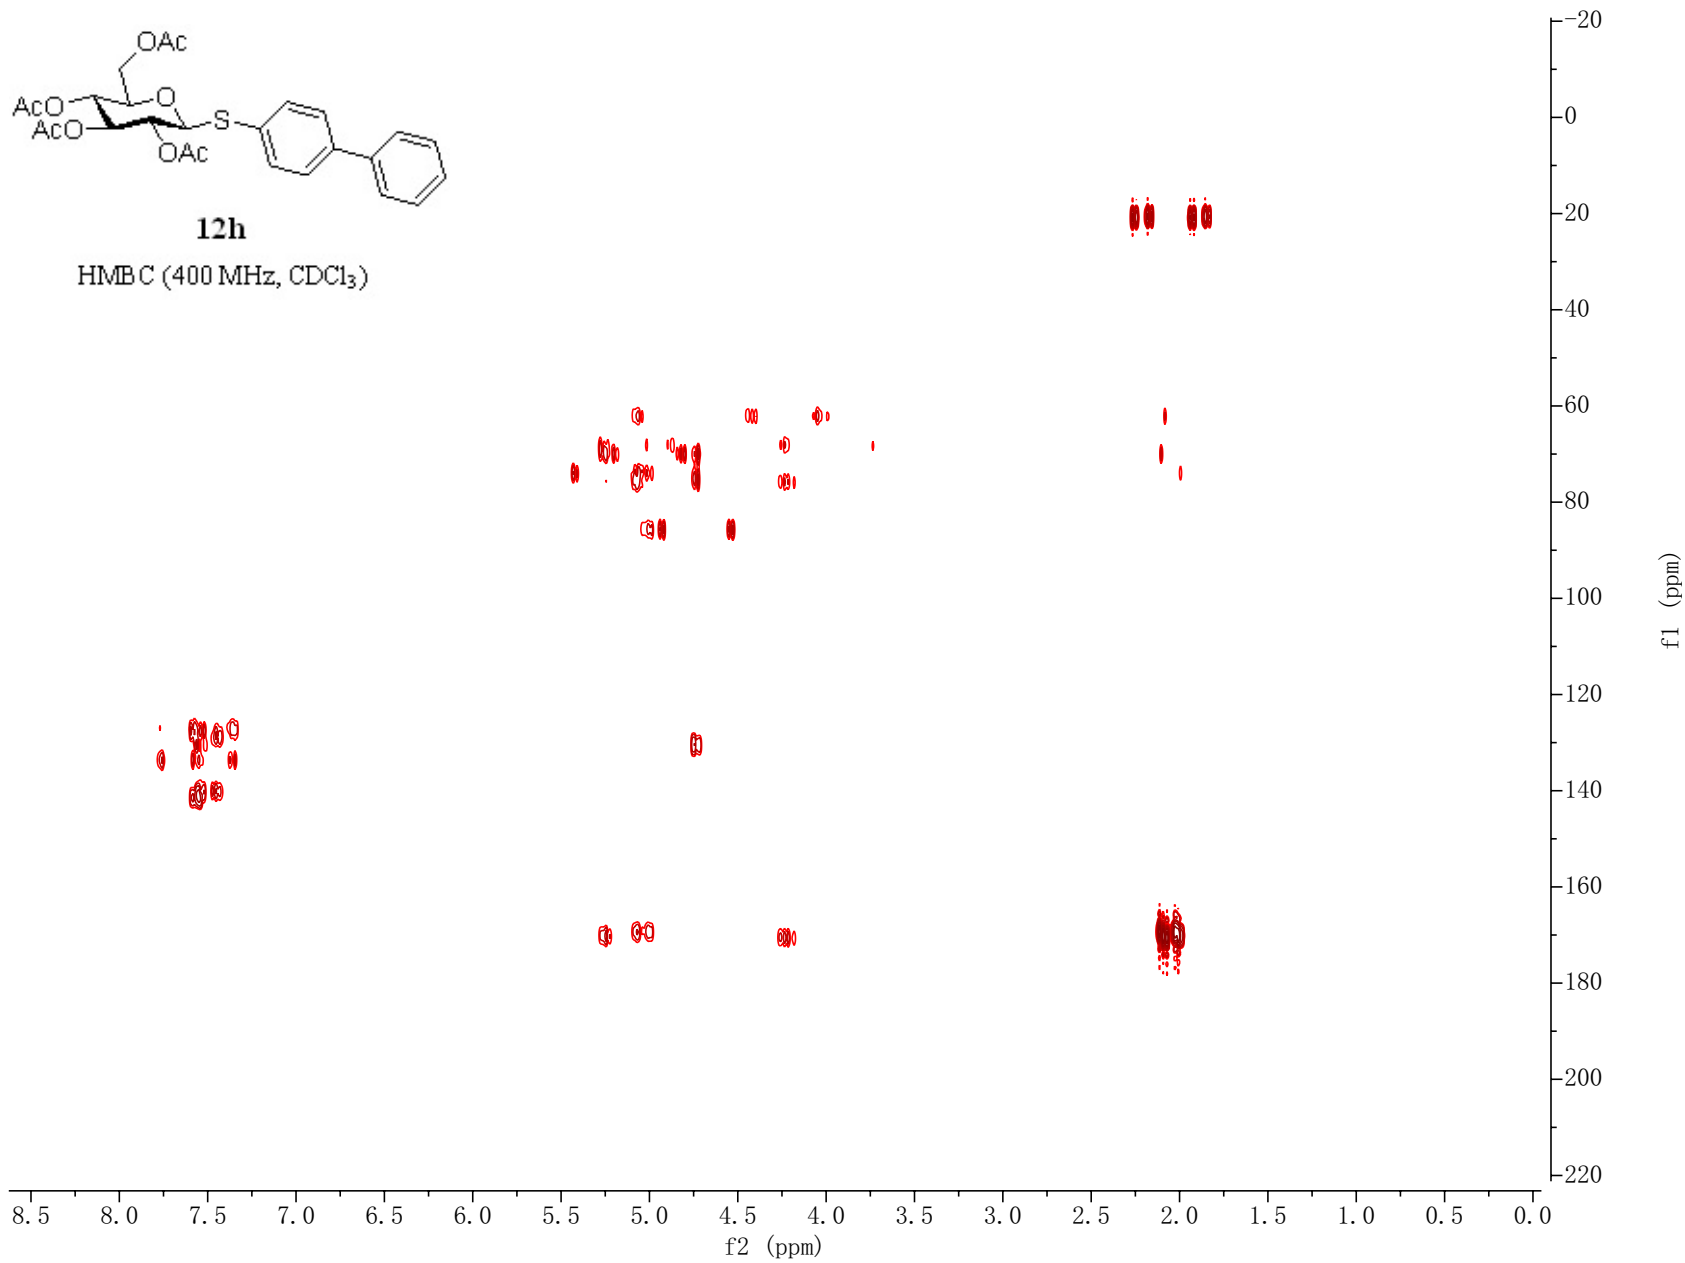

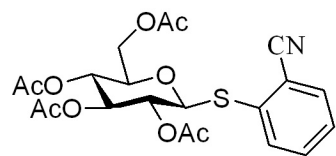

**12i**

<sup>1</sup>H NMR (400 MHz, CDCl<sub>3</sub>)

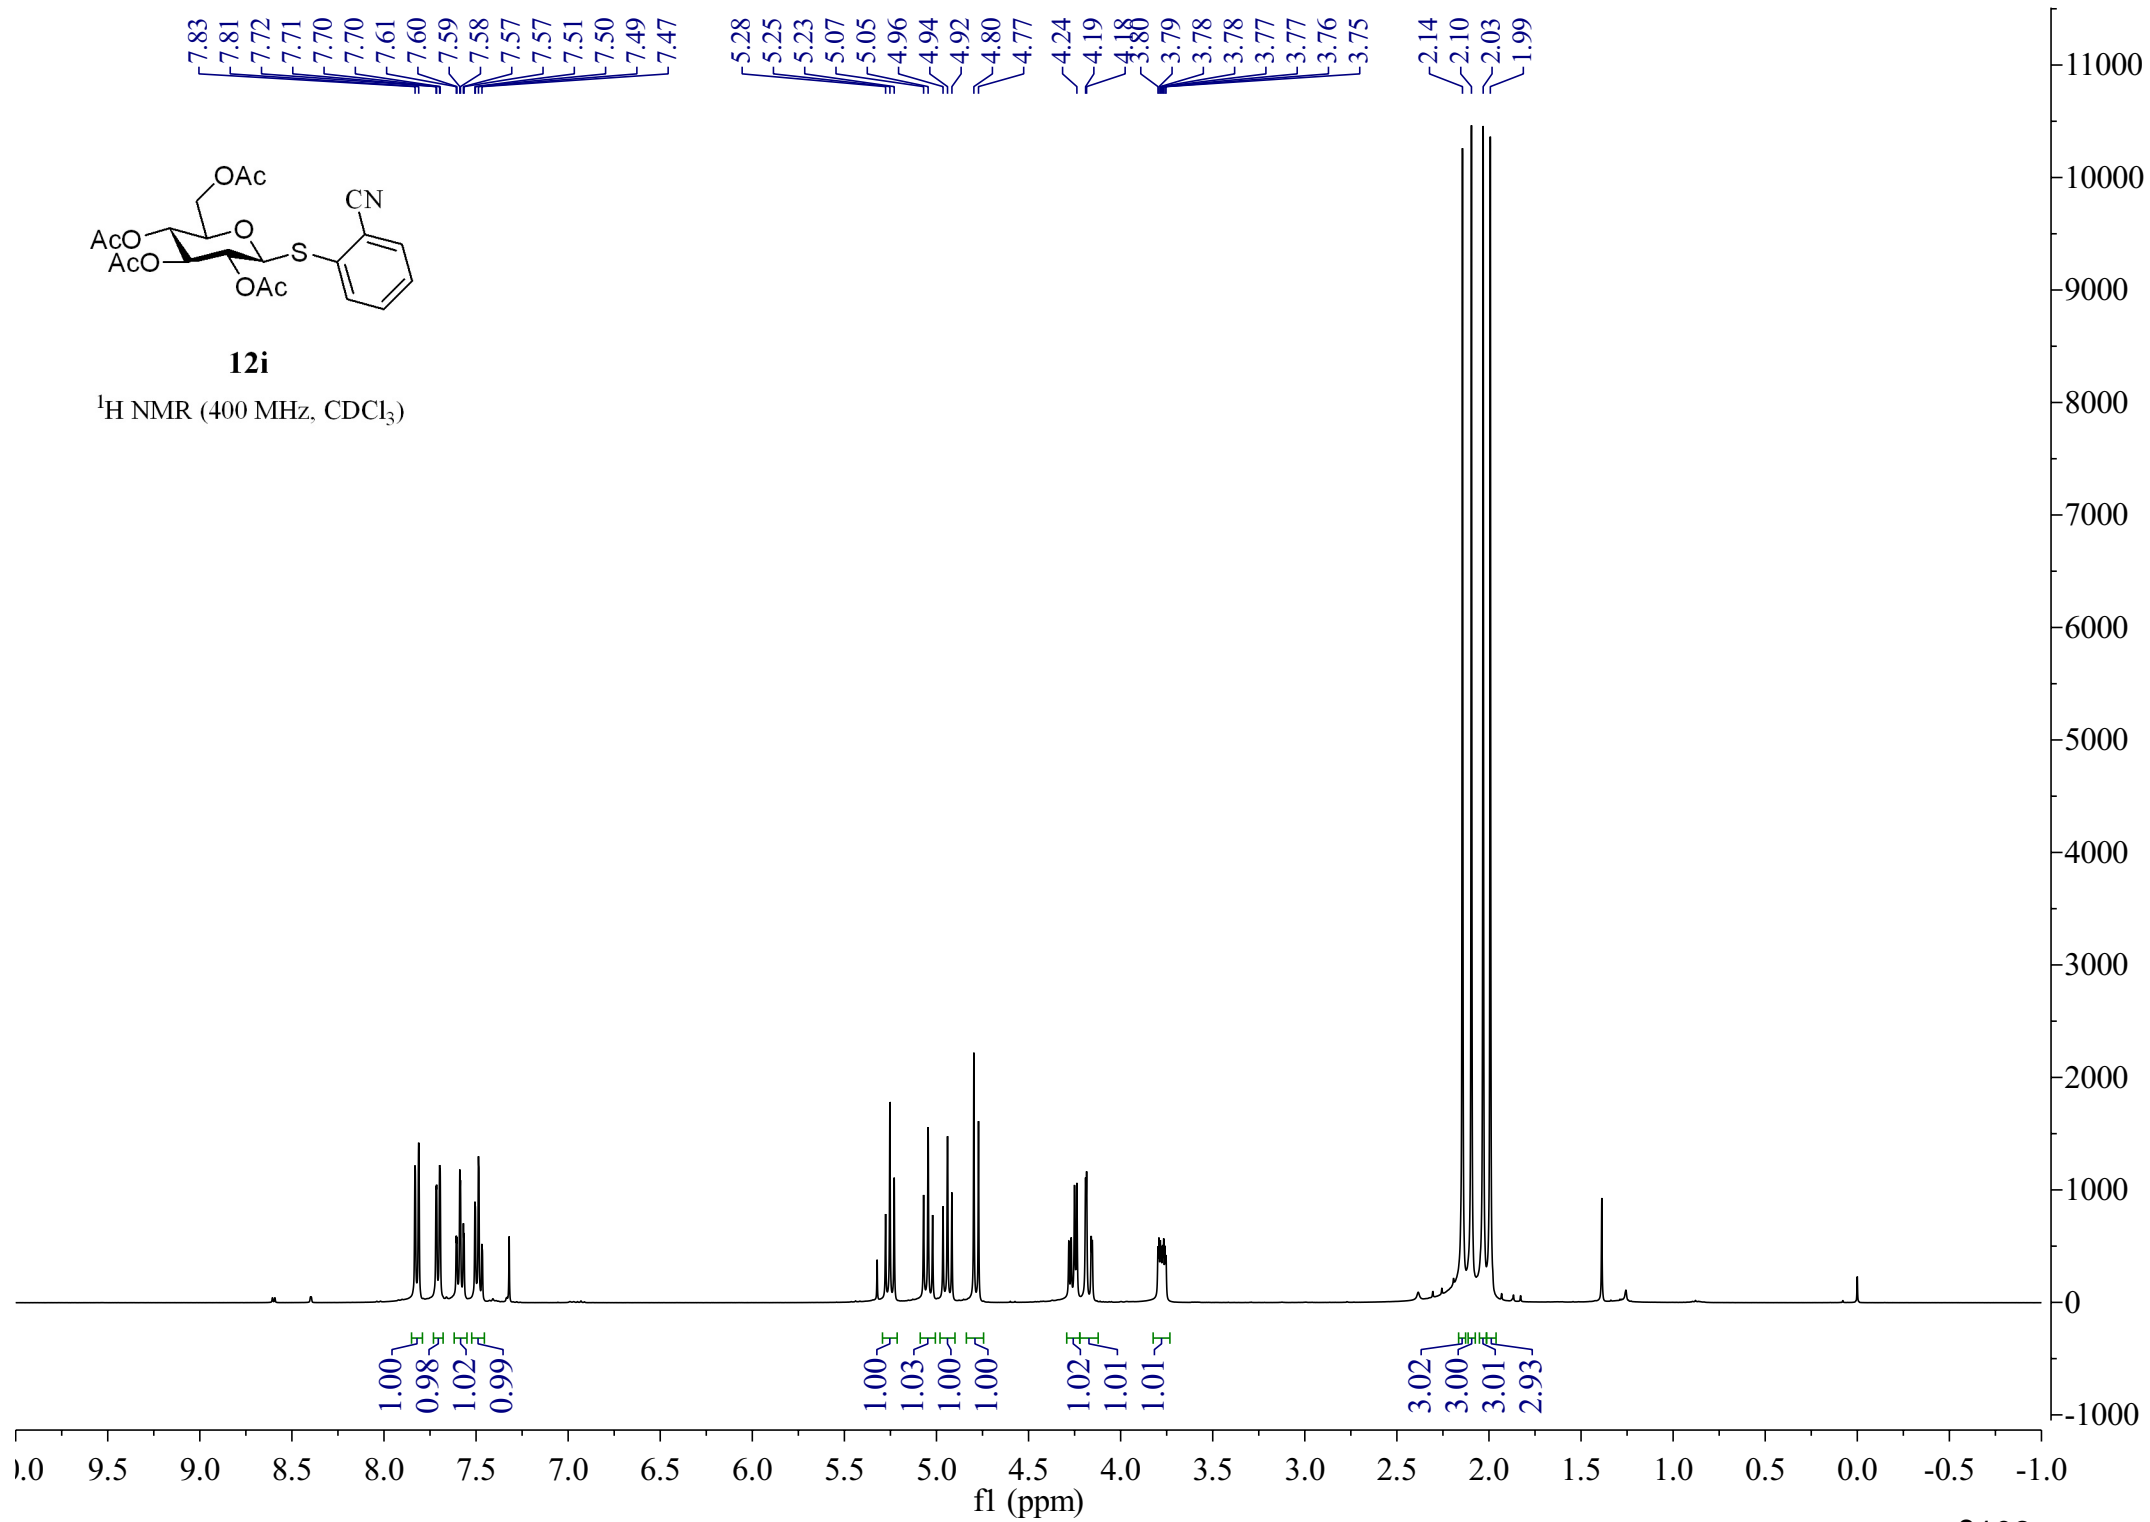

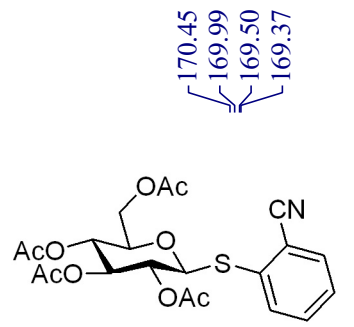

**12i**

$^{13}\text{C}\{^1\text{H}\}$  NMR (100 MHz,  $\text{CDCl}_3$ )

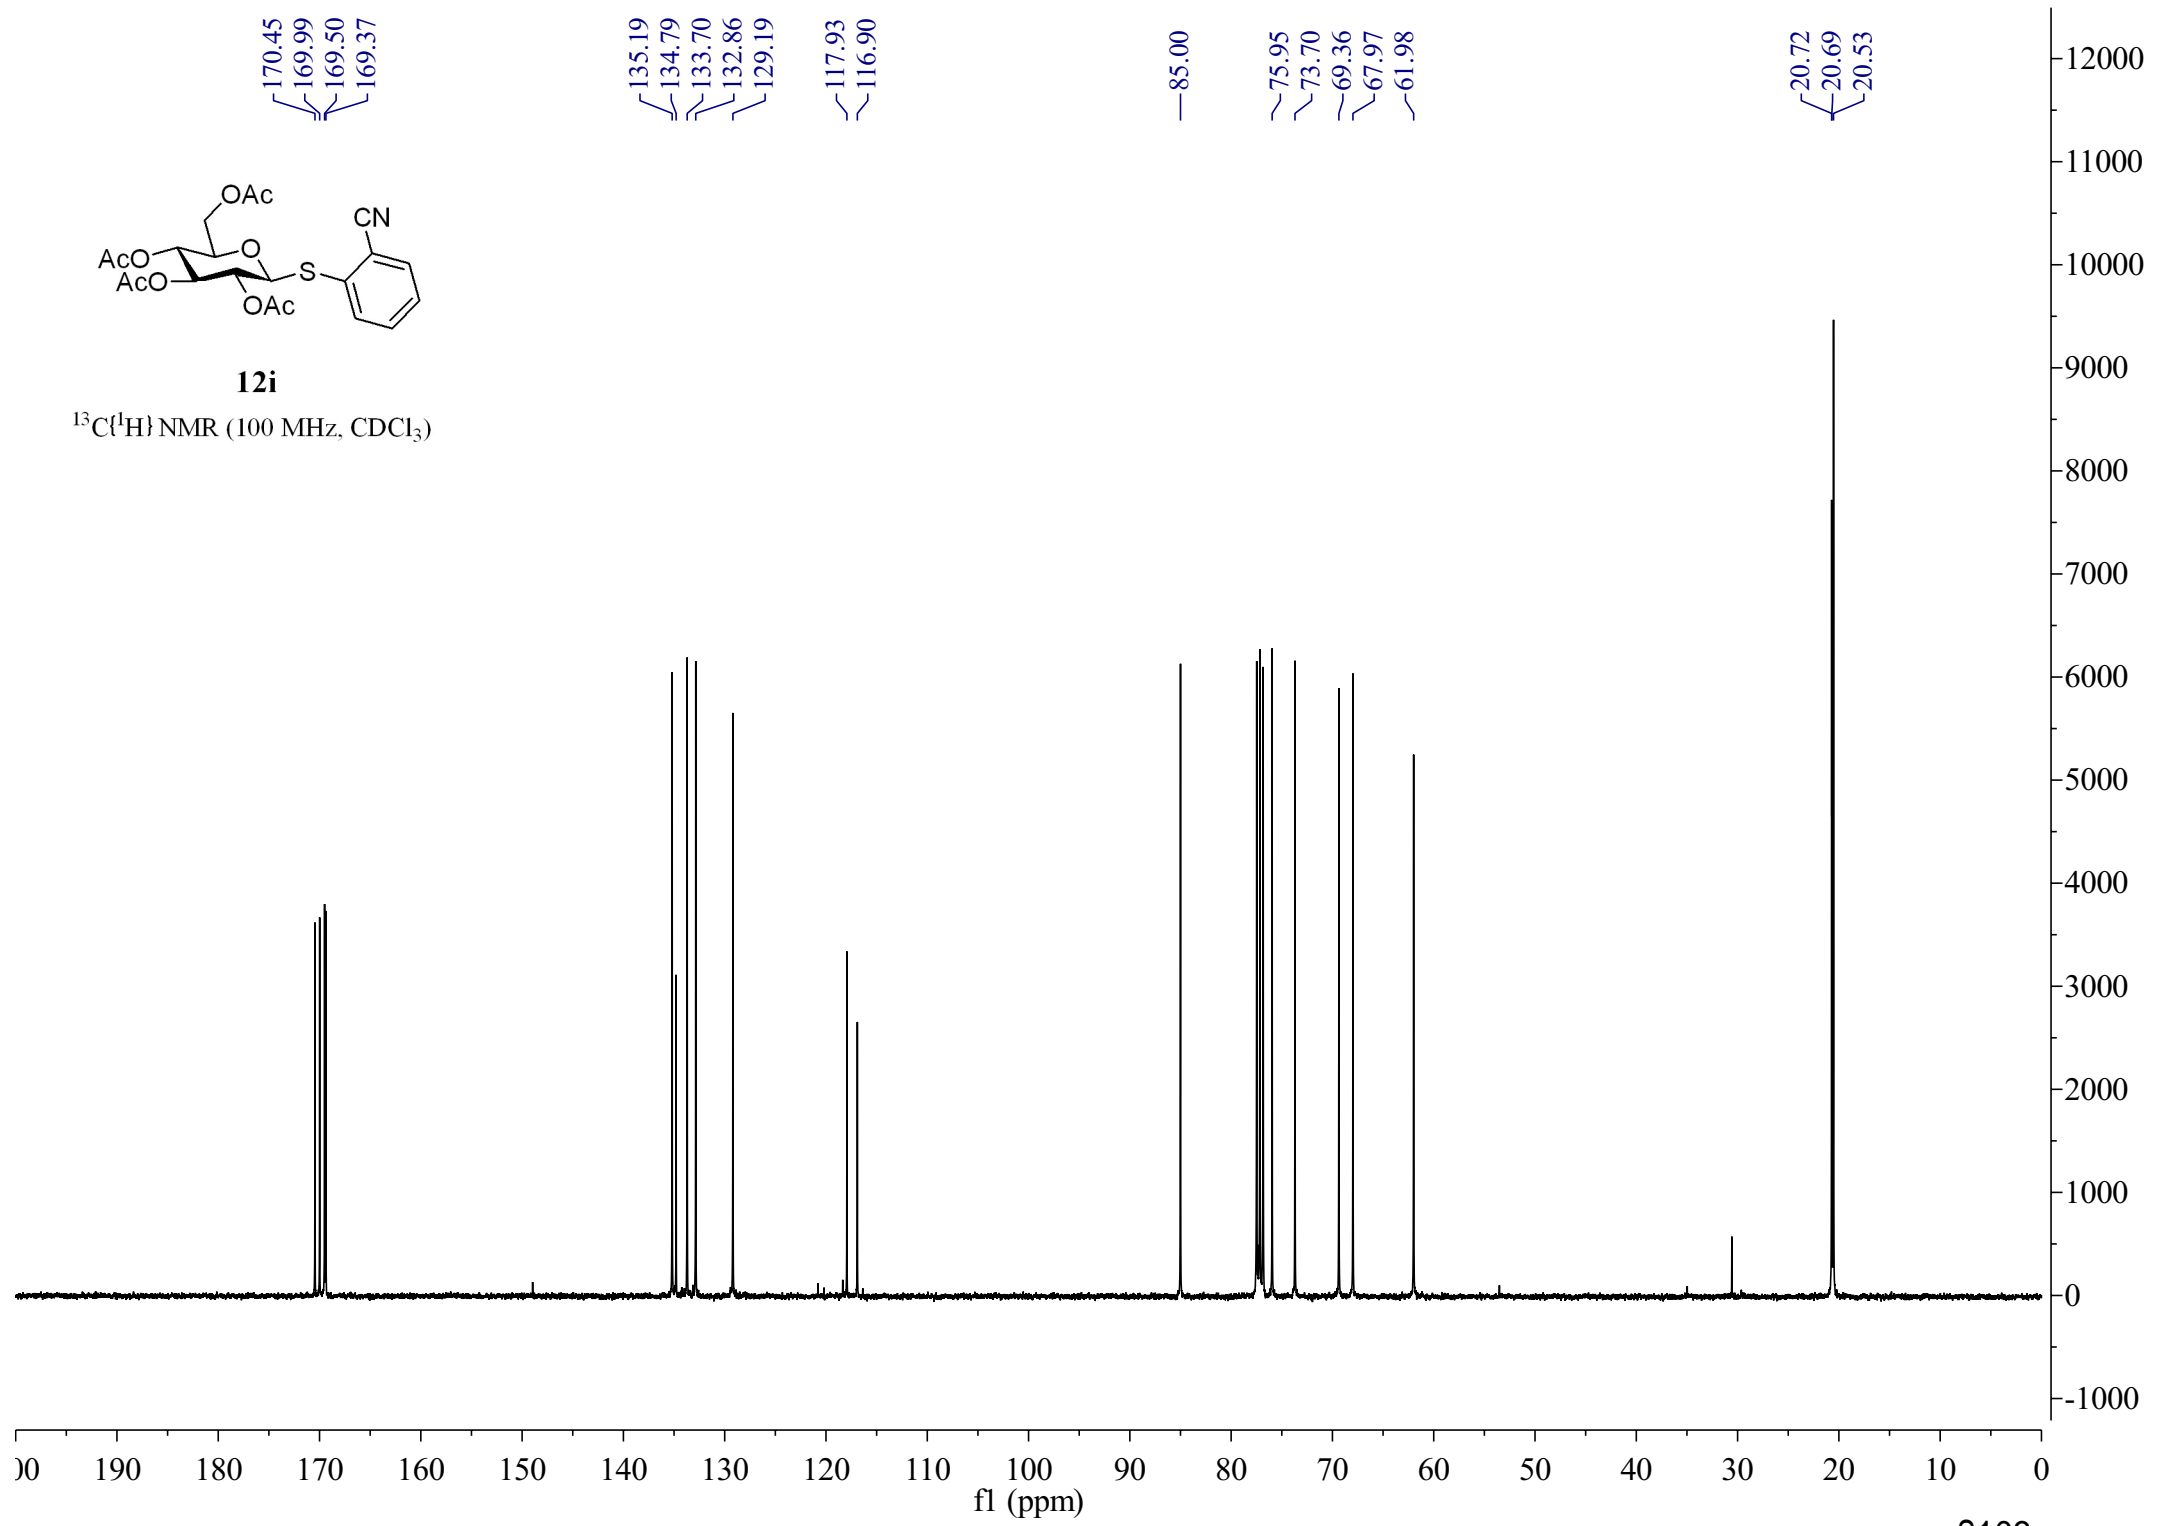

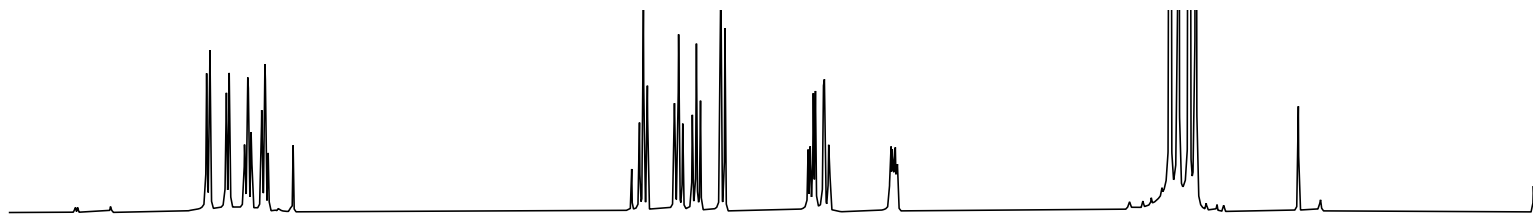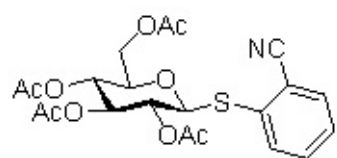

**12i**

$^1\text{H}$ - $^1\text{H}$  COSY (400 MHz,  $\text{CDCl}_3$ )

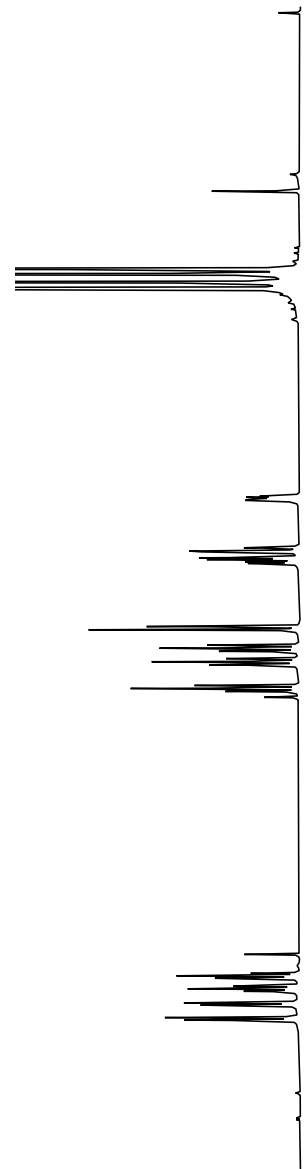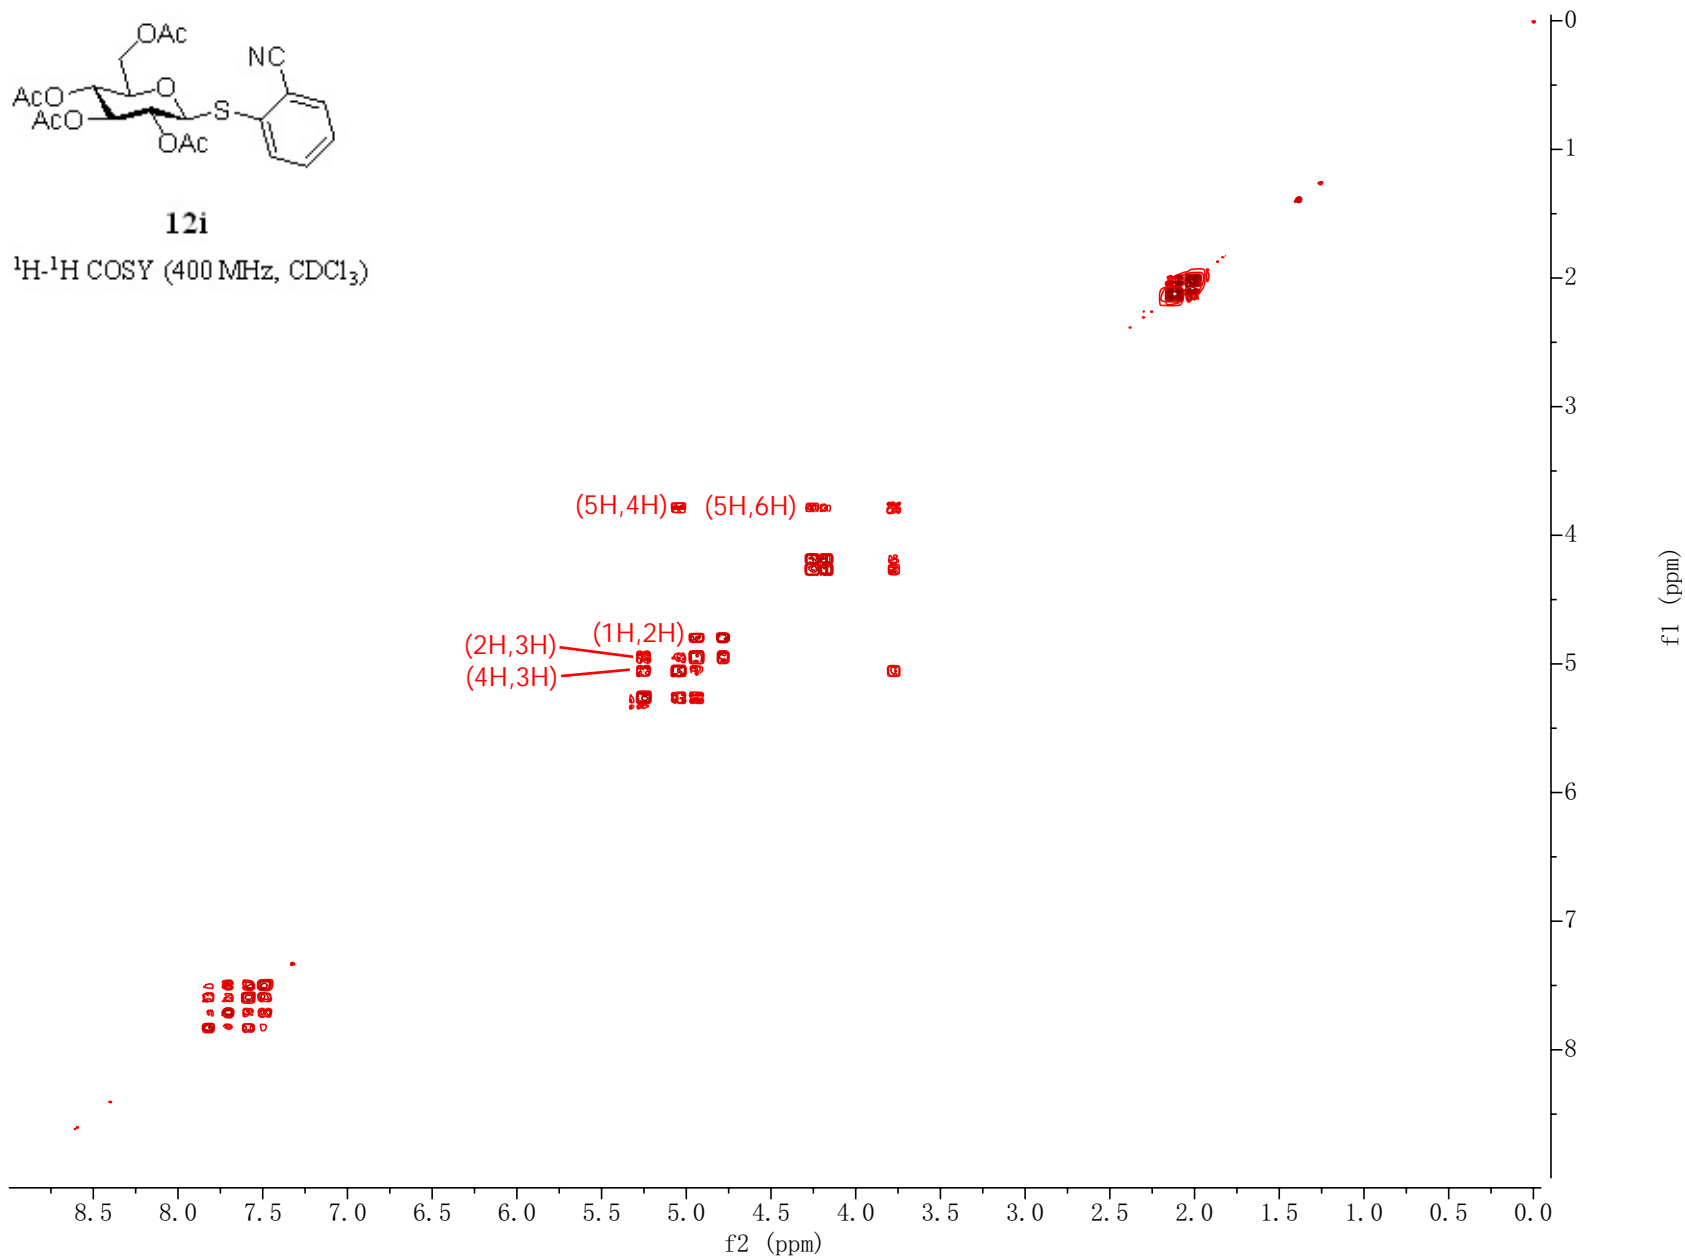



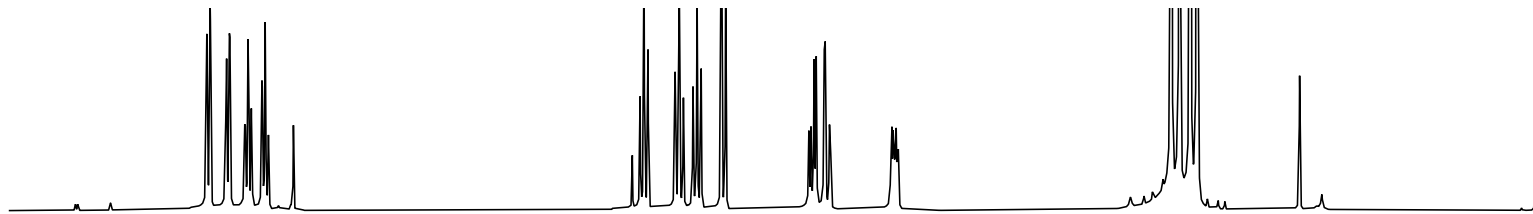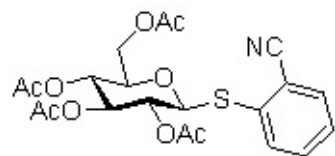

**12i**

HSQC (400 MHz, CDCl<sub>3</sub>)

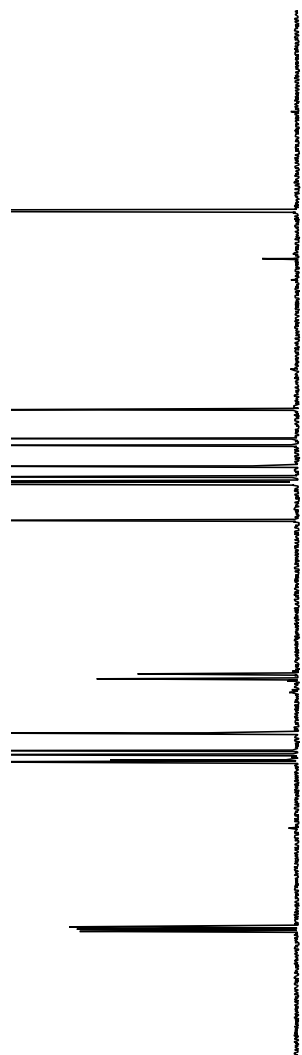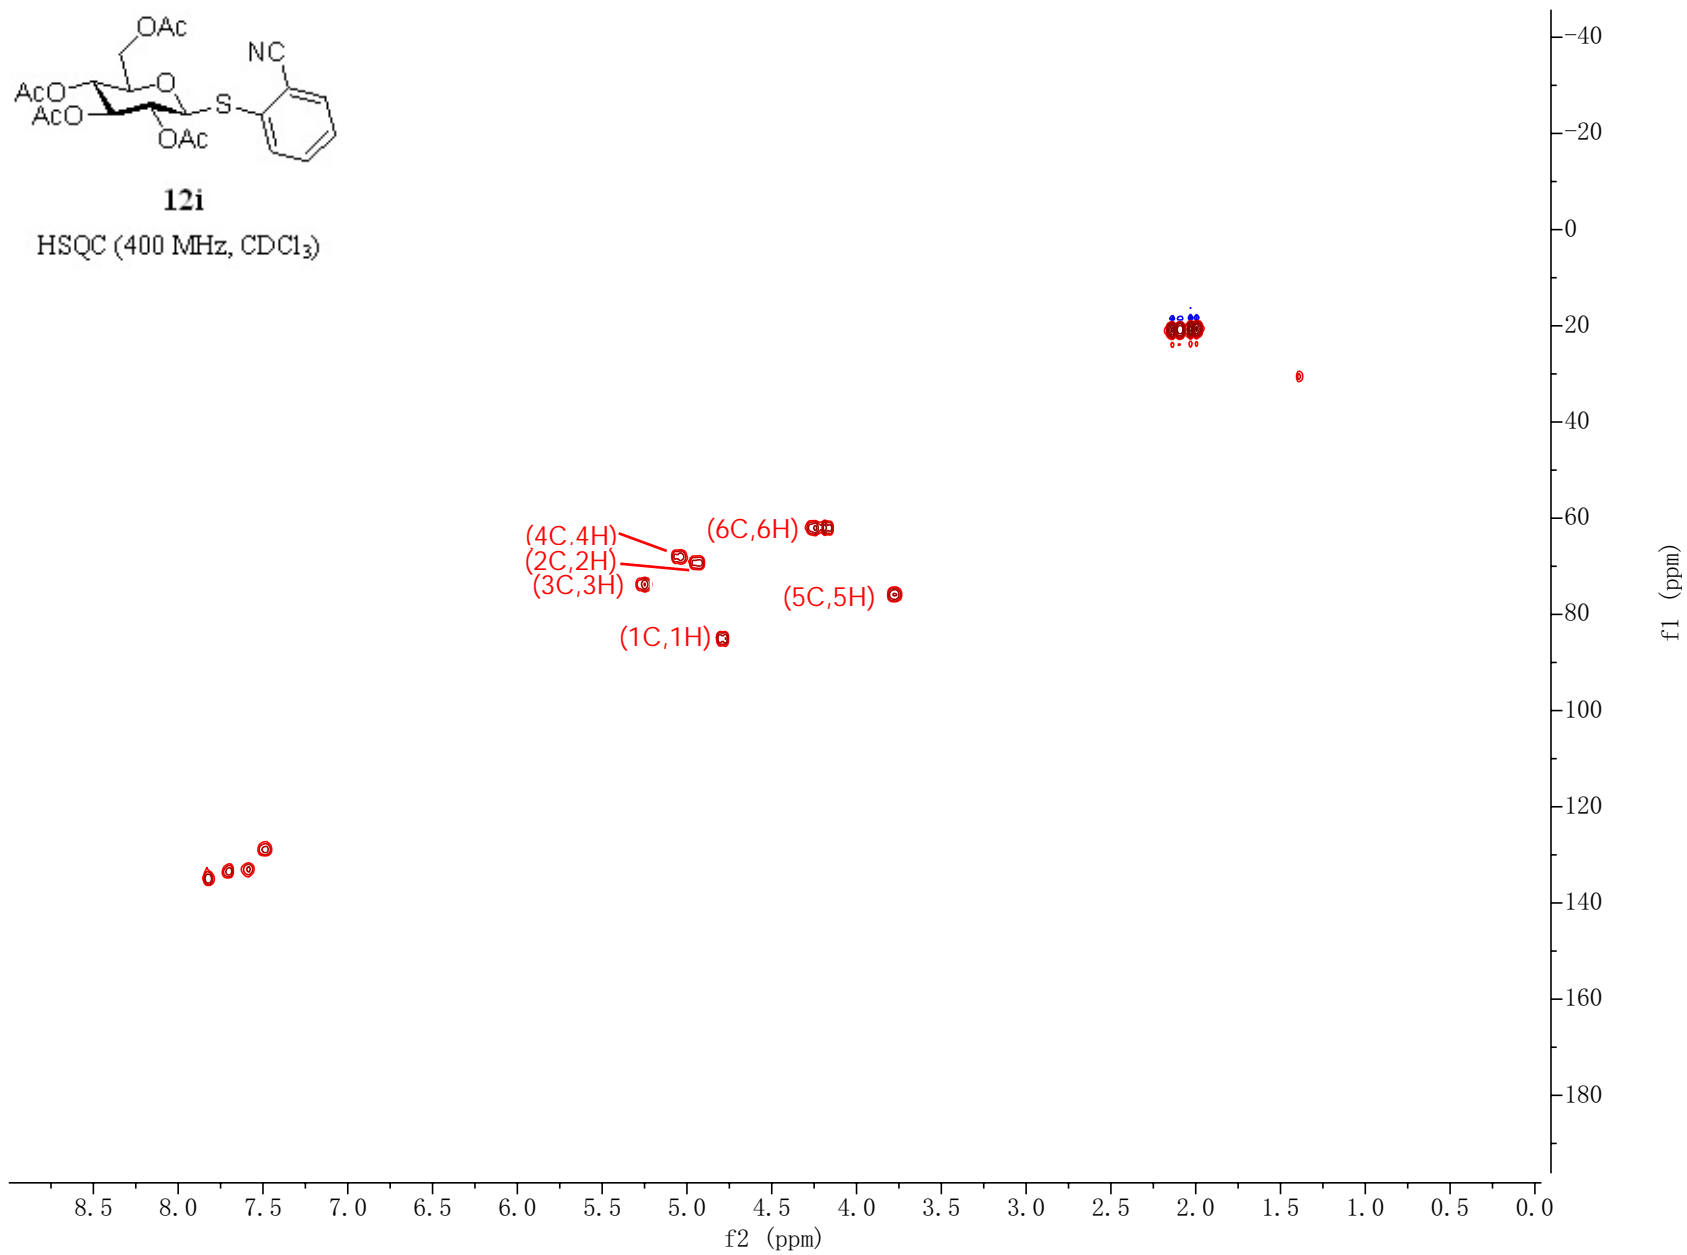

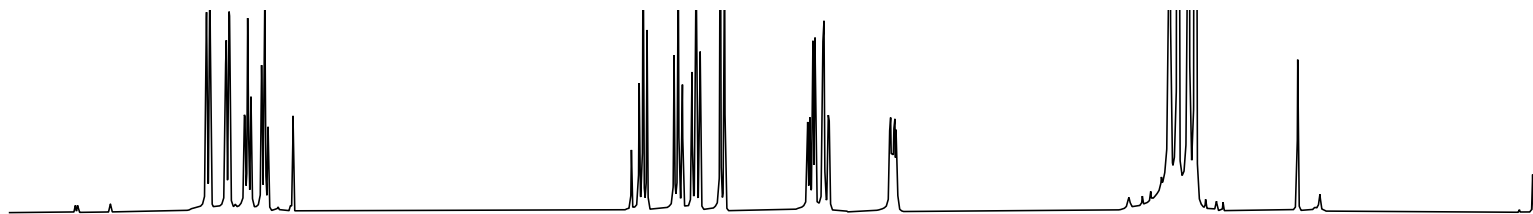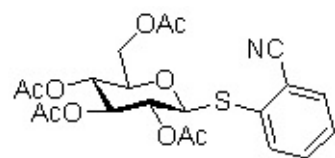

**12i**

HMBC (400 MHz, CDCl<sub>3</sub>)

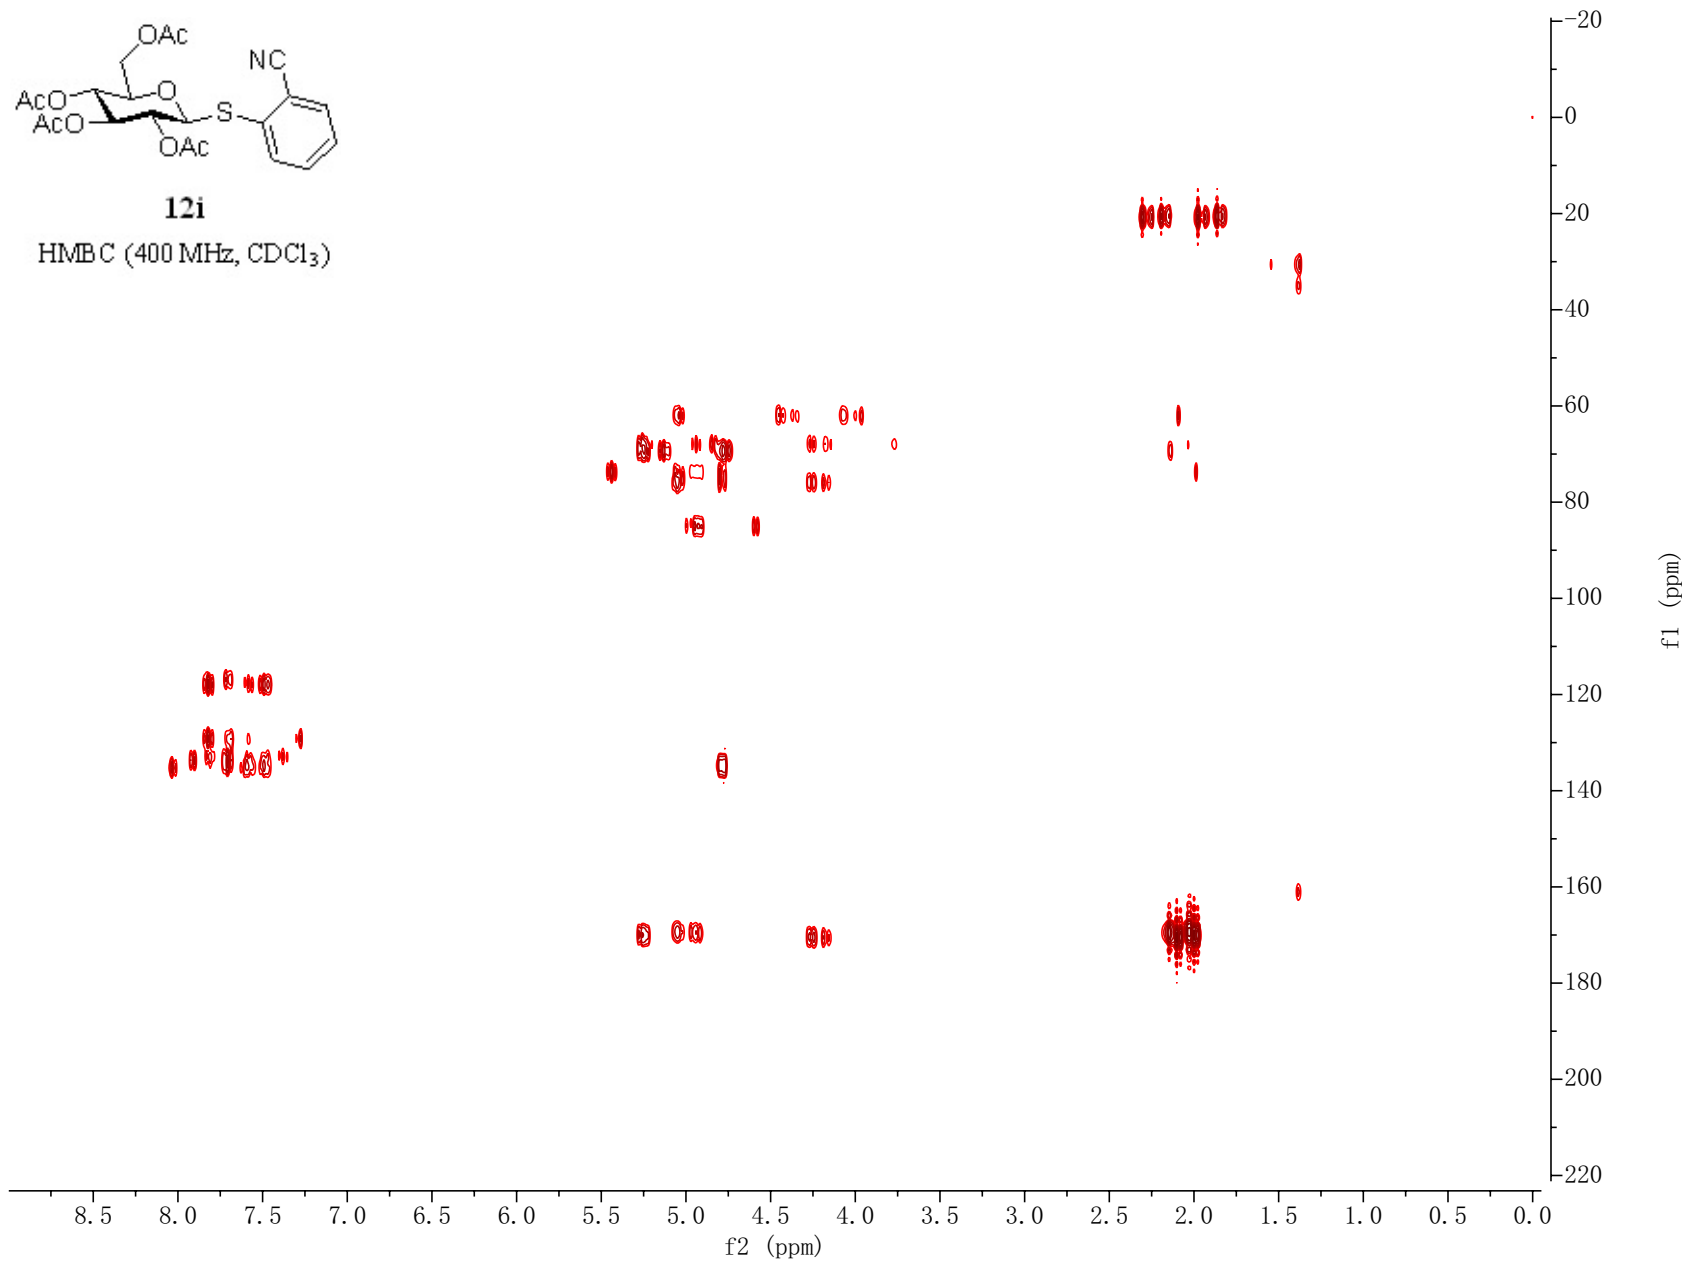

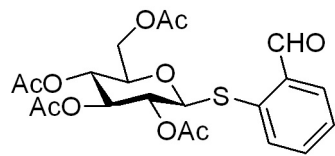

**12j**

$^1\text{H}$  NMR (400 MHz,  $\text{CDCl}_3$ )

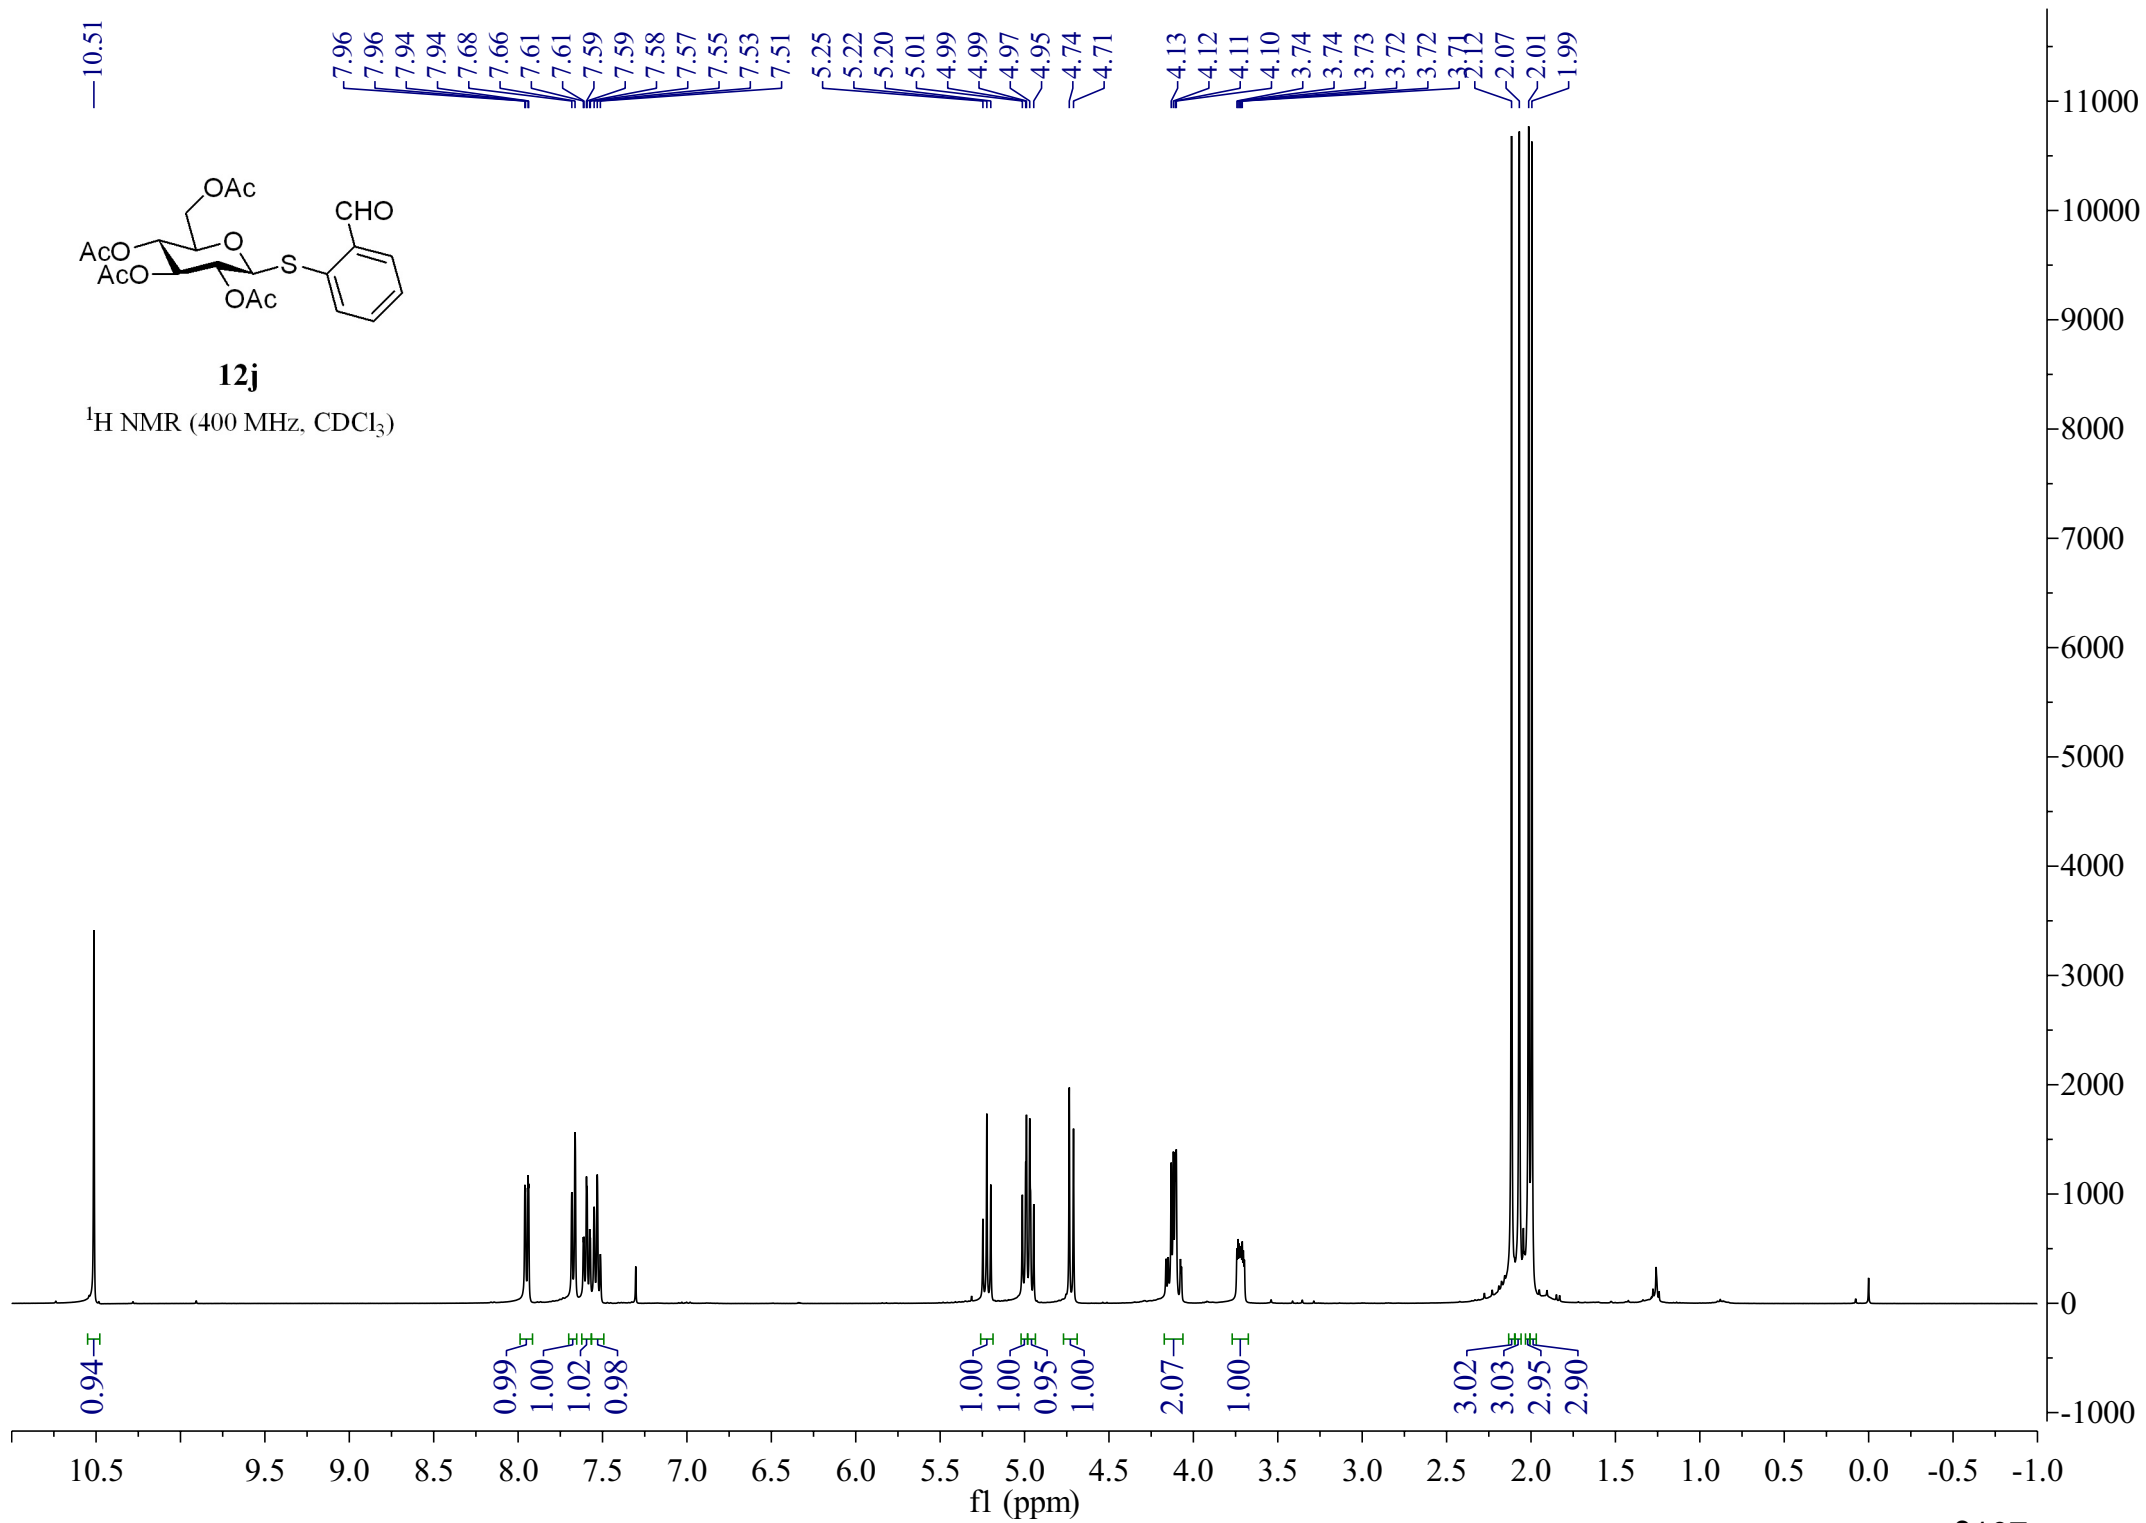

191.79  
170.54  
170.08  
169.31  
169.23

137.82  
135.67  
134.19  
134.00  
129.44  
129.39

84.63  
75.82  
73.79  
69.92  
67.97  
61.95

20.69  
20.62  
20.54  
20.52

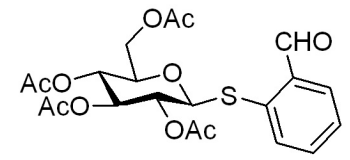

**12j**

$^{13}\text{C}\{^1\text{H}\}$  NMR (100 MHz,  $\text{CDCl}_3$ )

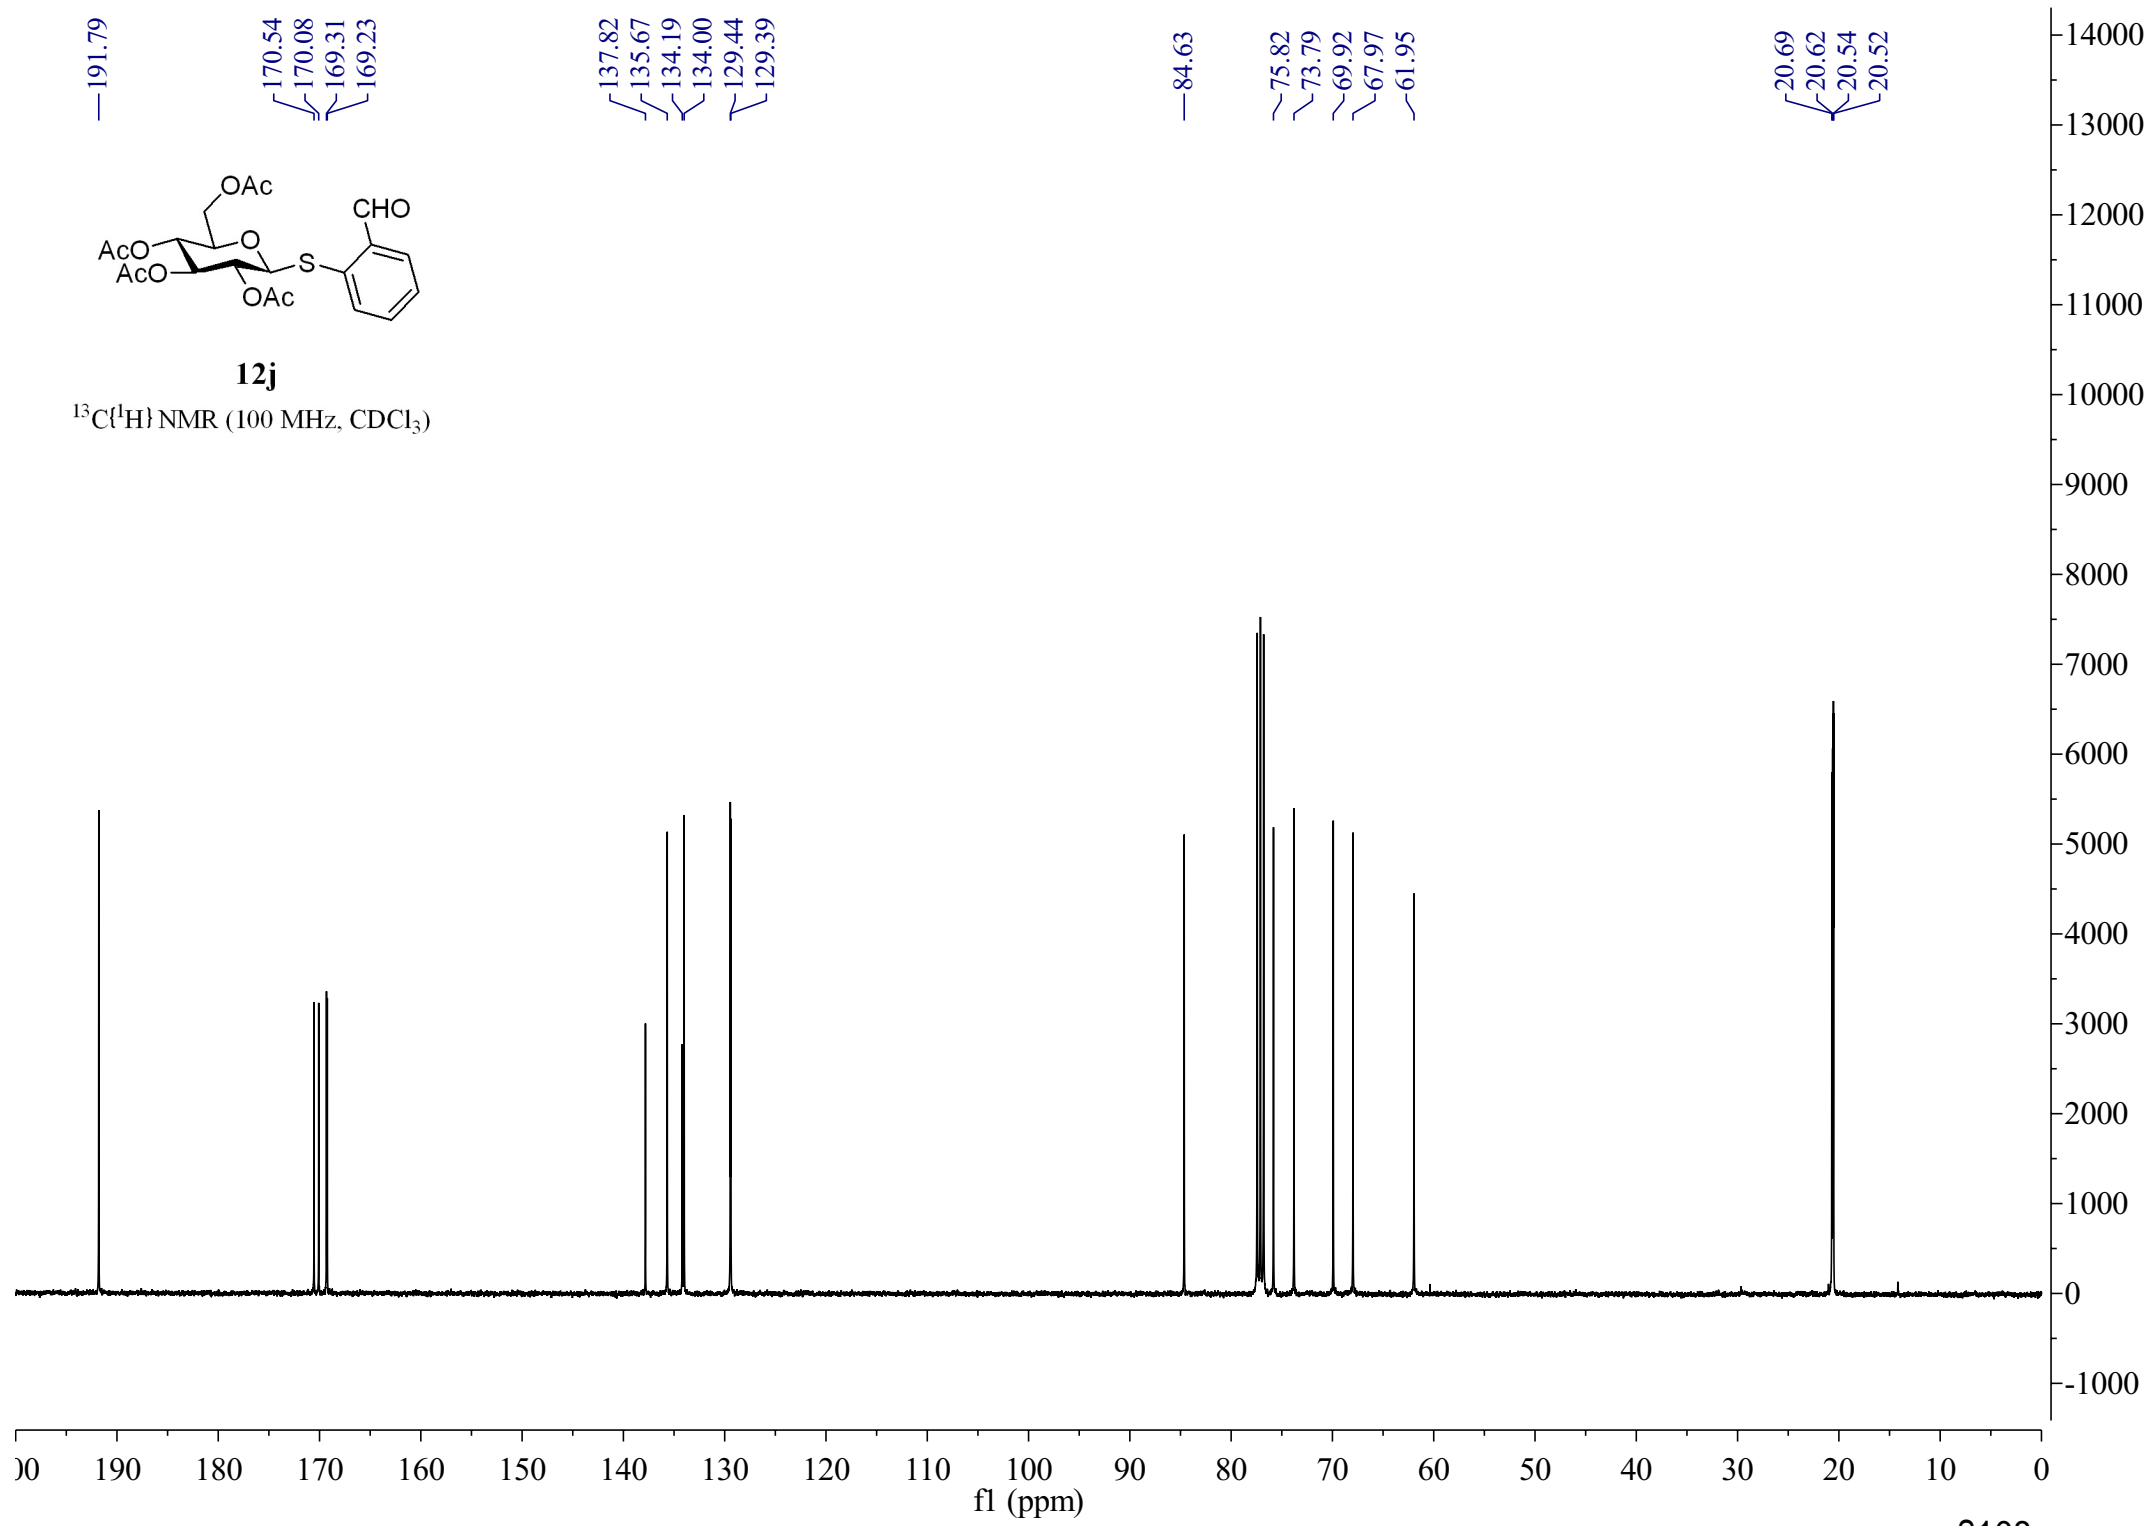

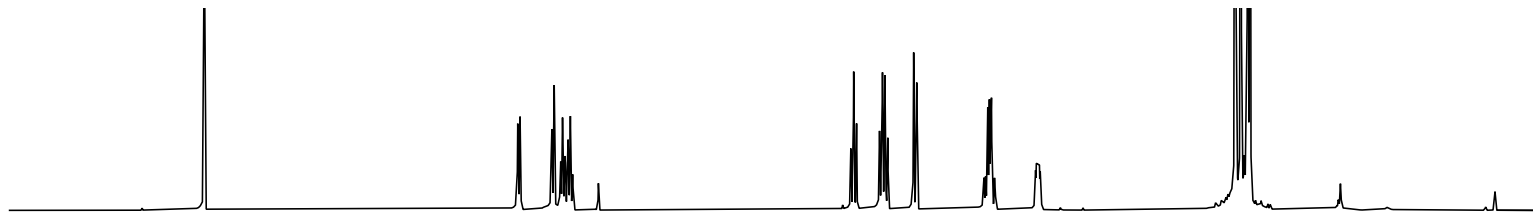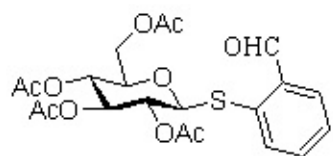

12j

$^1\text{H}$ - $^1\text{H}$  COSY (400 MHz,  $\text{CDCl}_3$ )

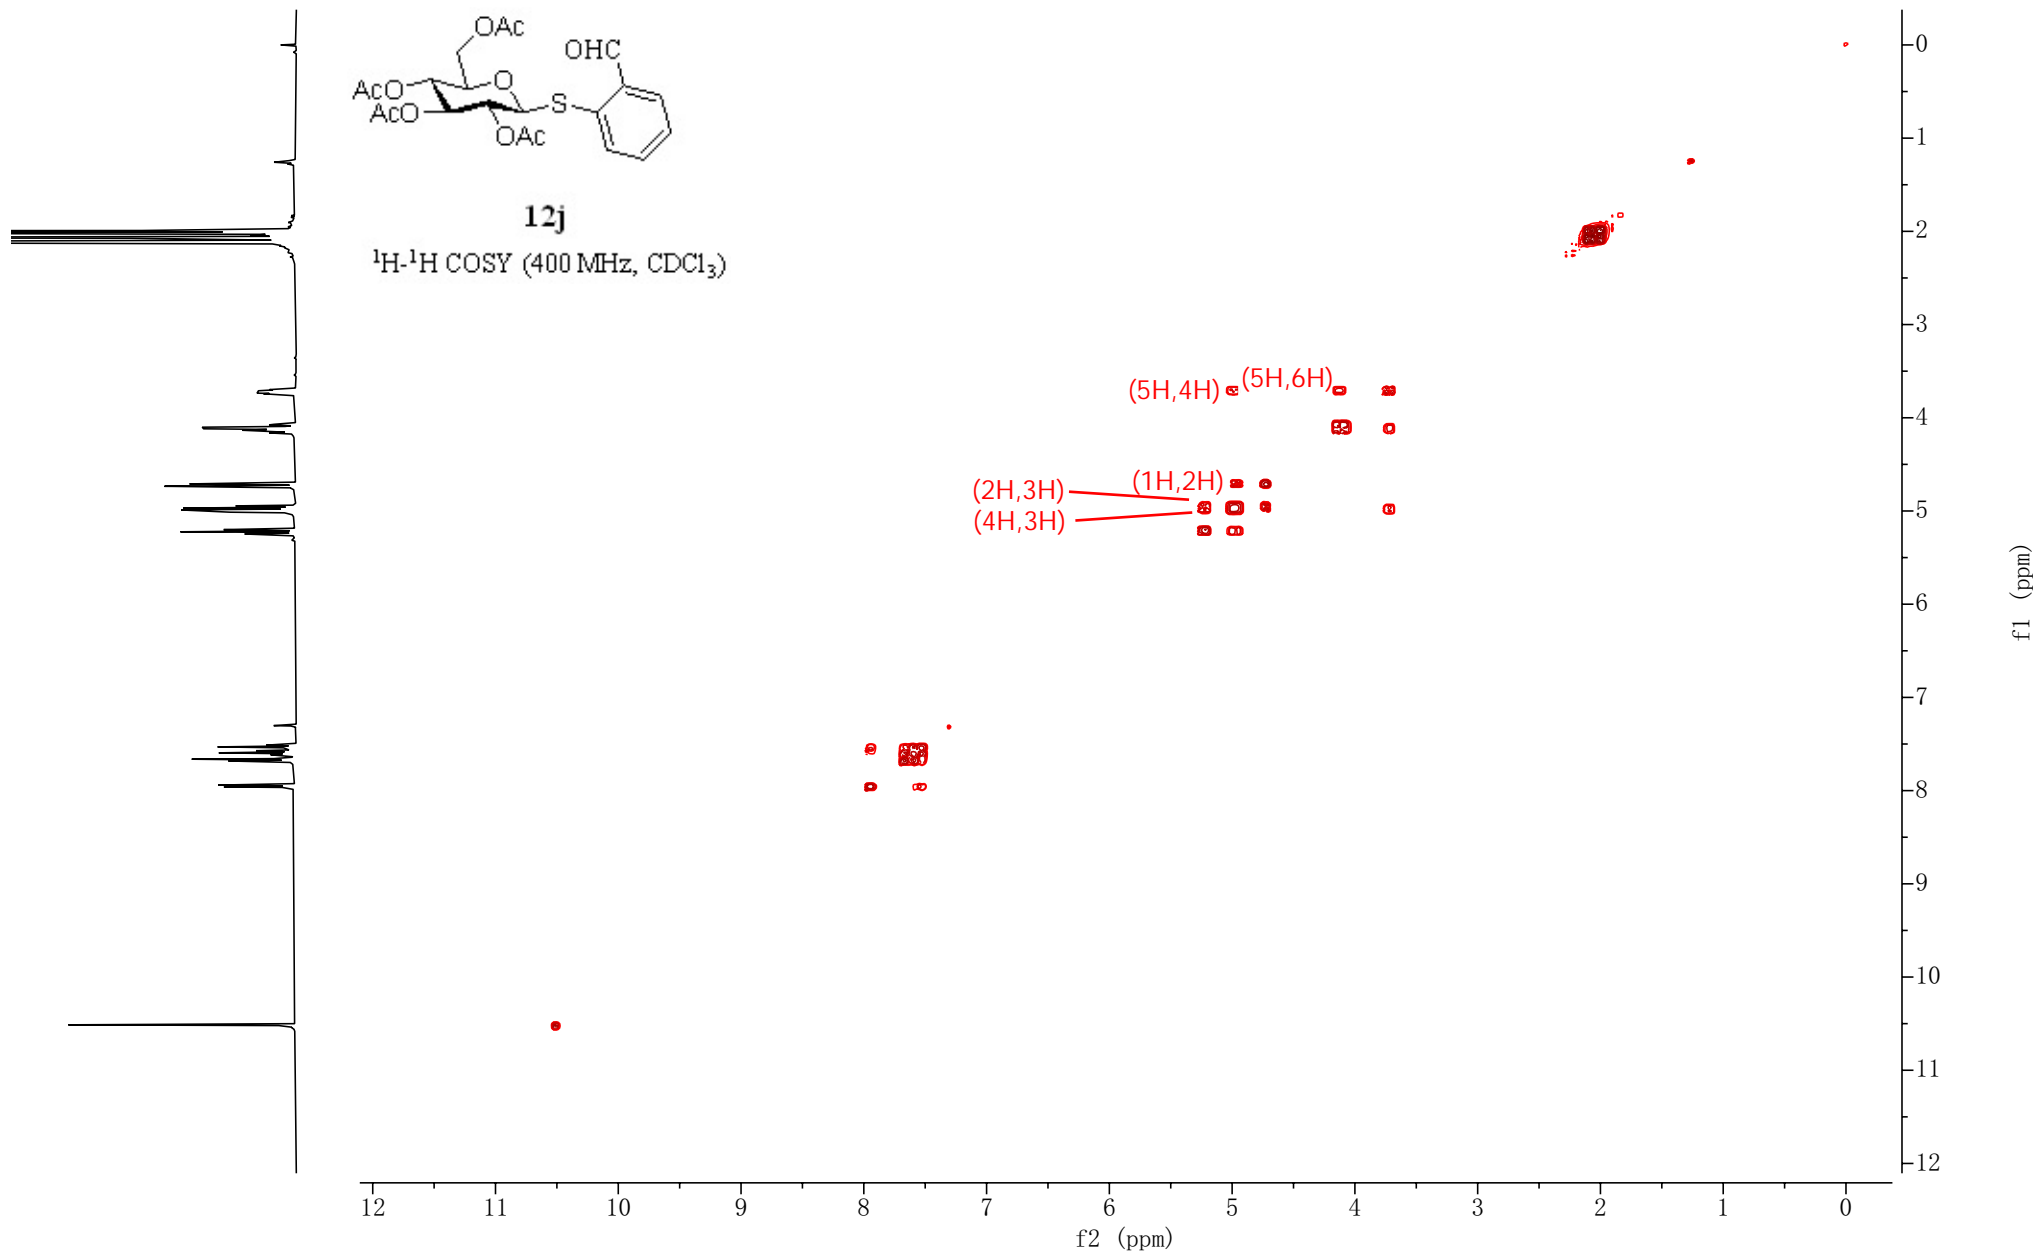

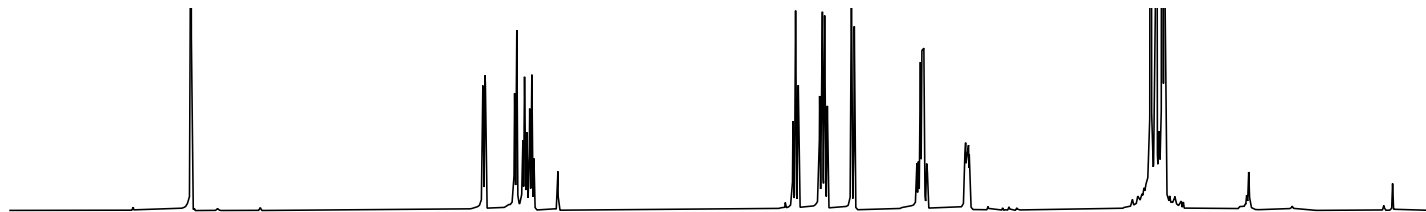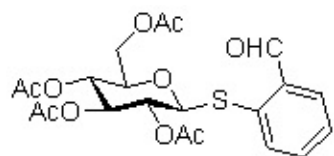

**12j**

HSQC (400 MHz, CDCl<sub>3</sub>)

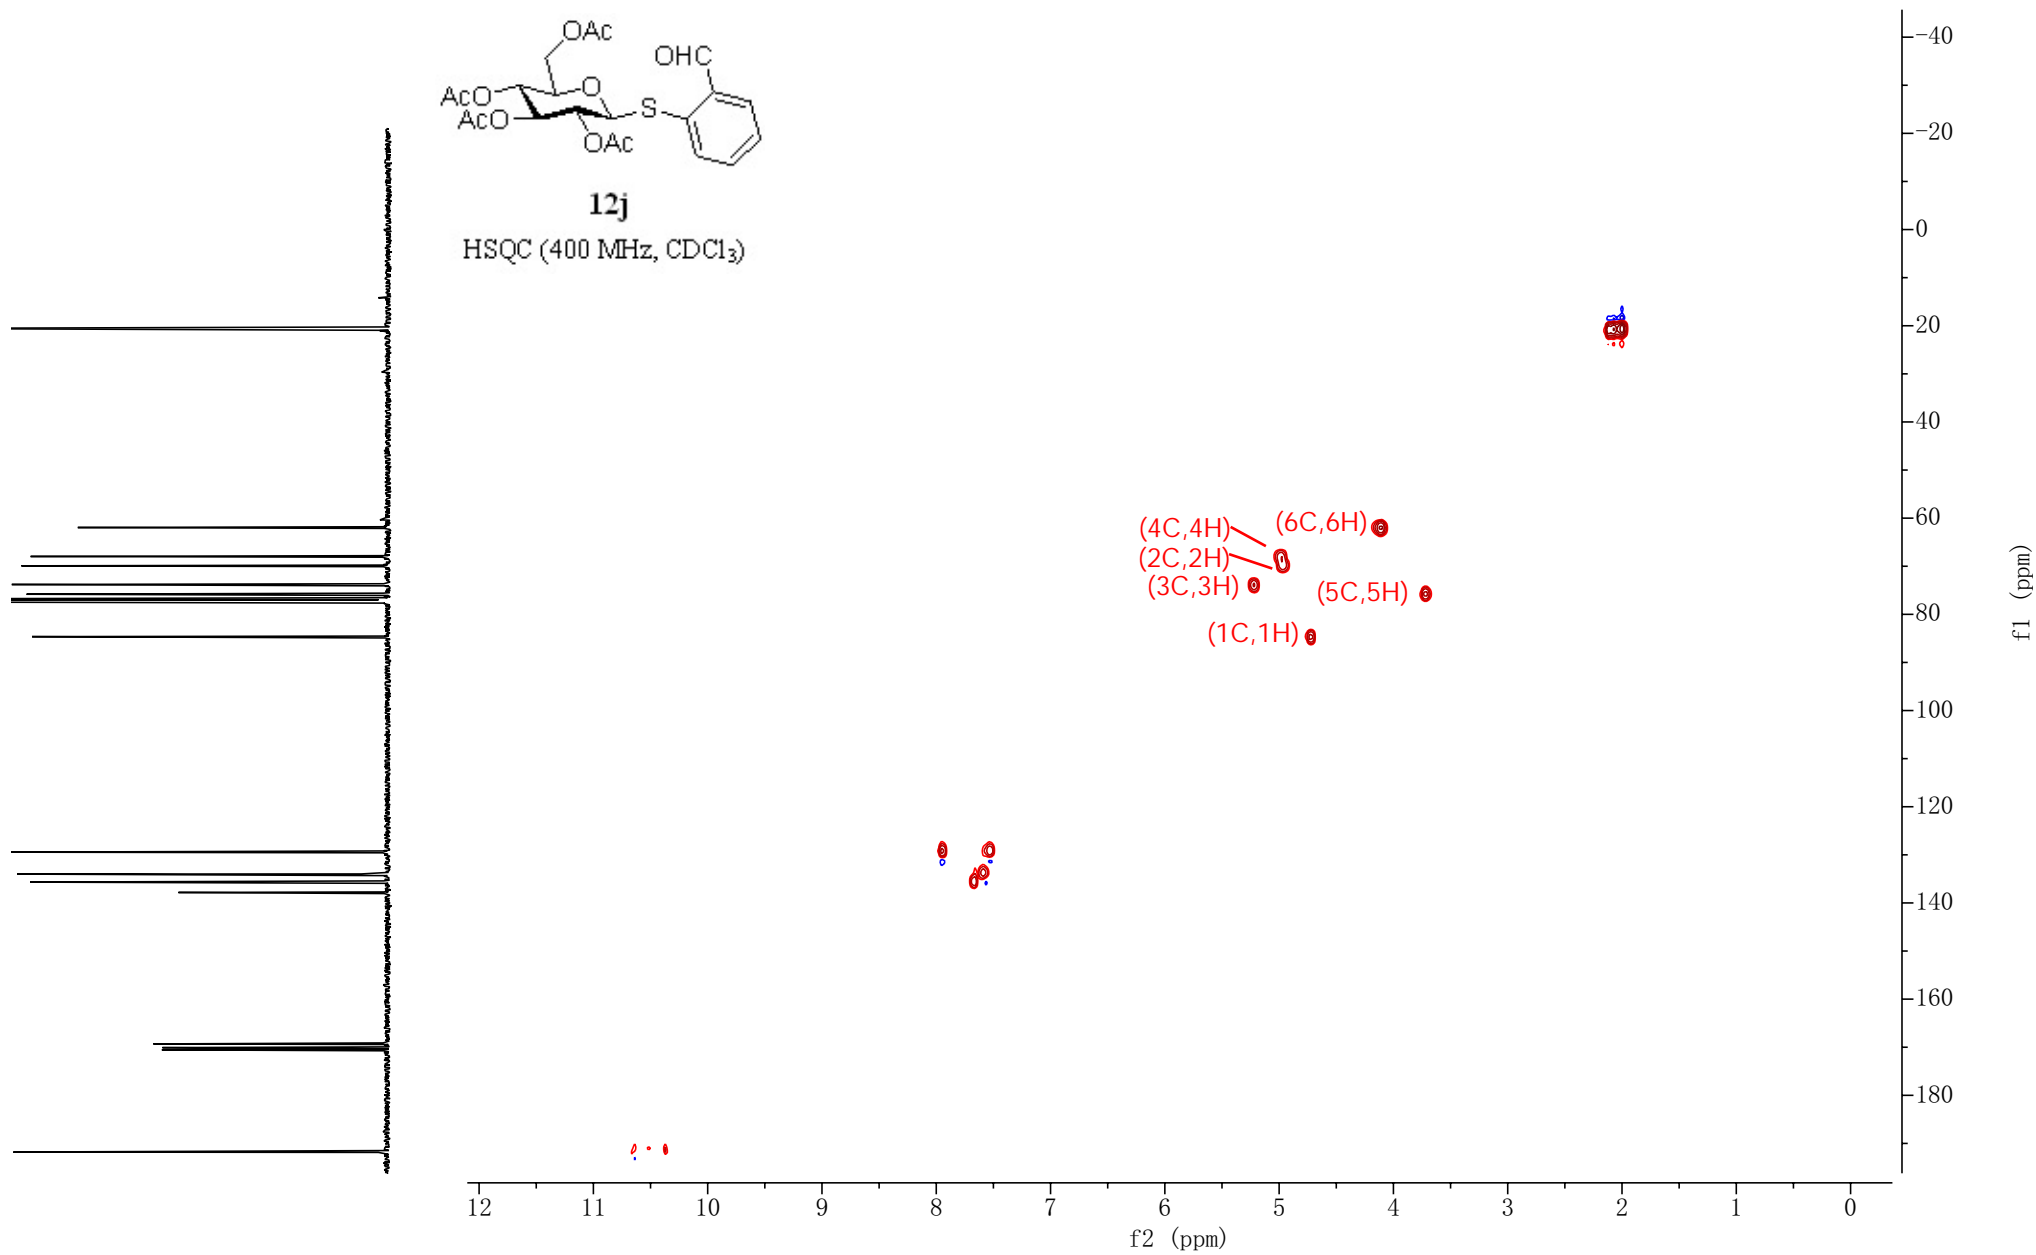

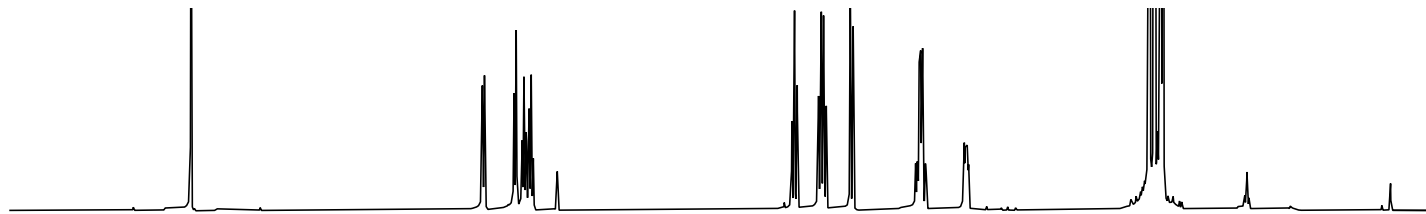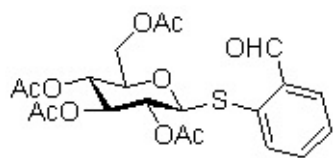

**12j**

HMBC (400 MHz, CDCl<sub>3</sub>)

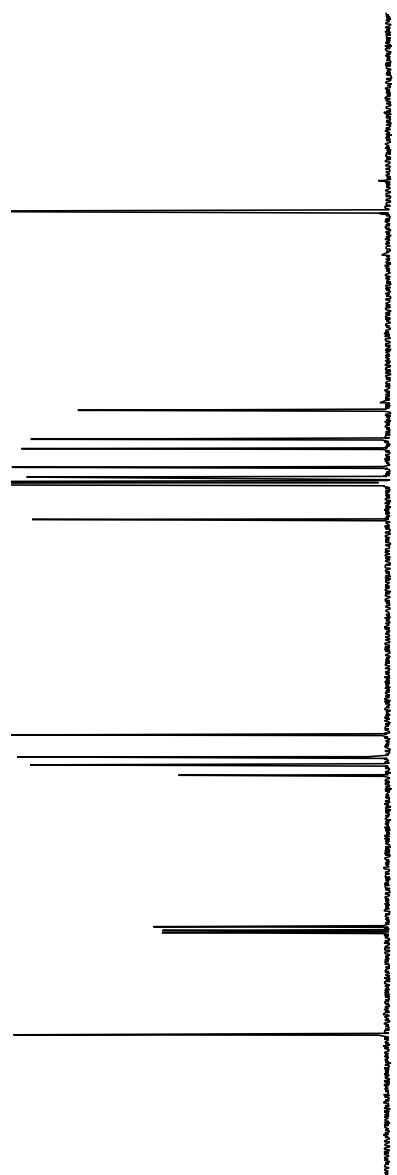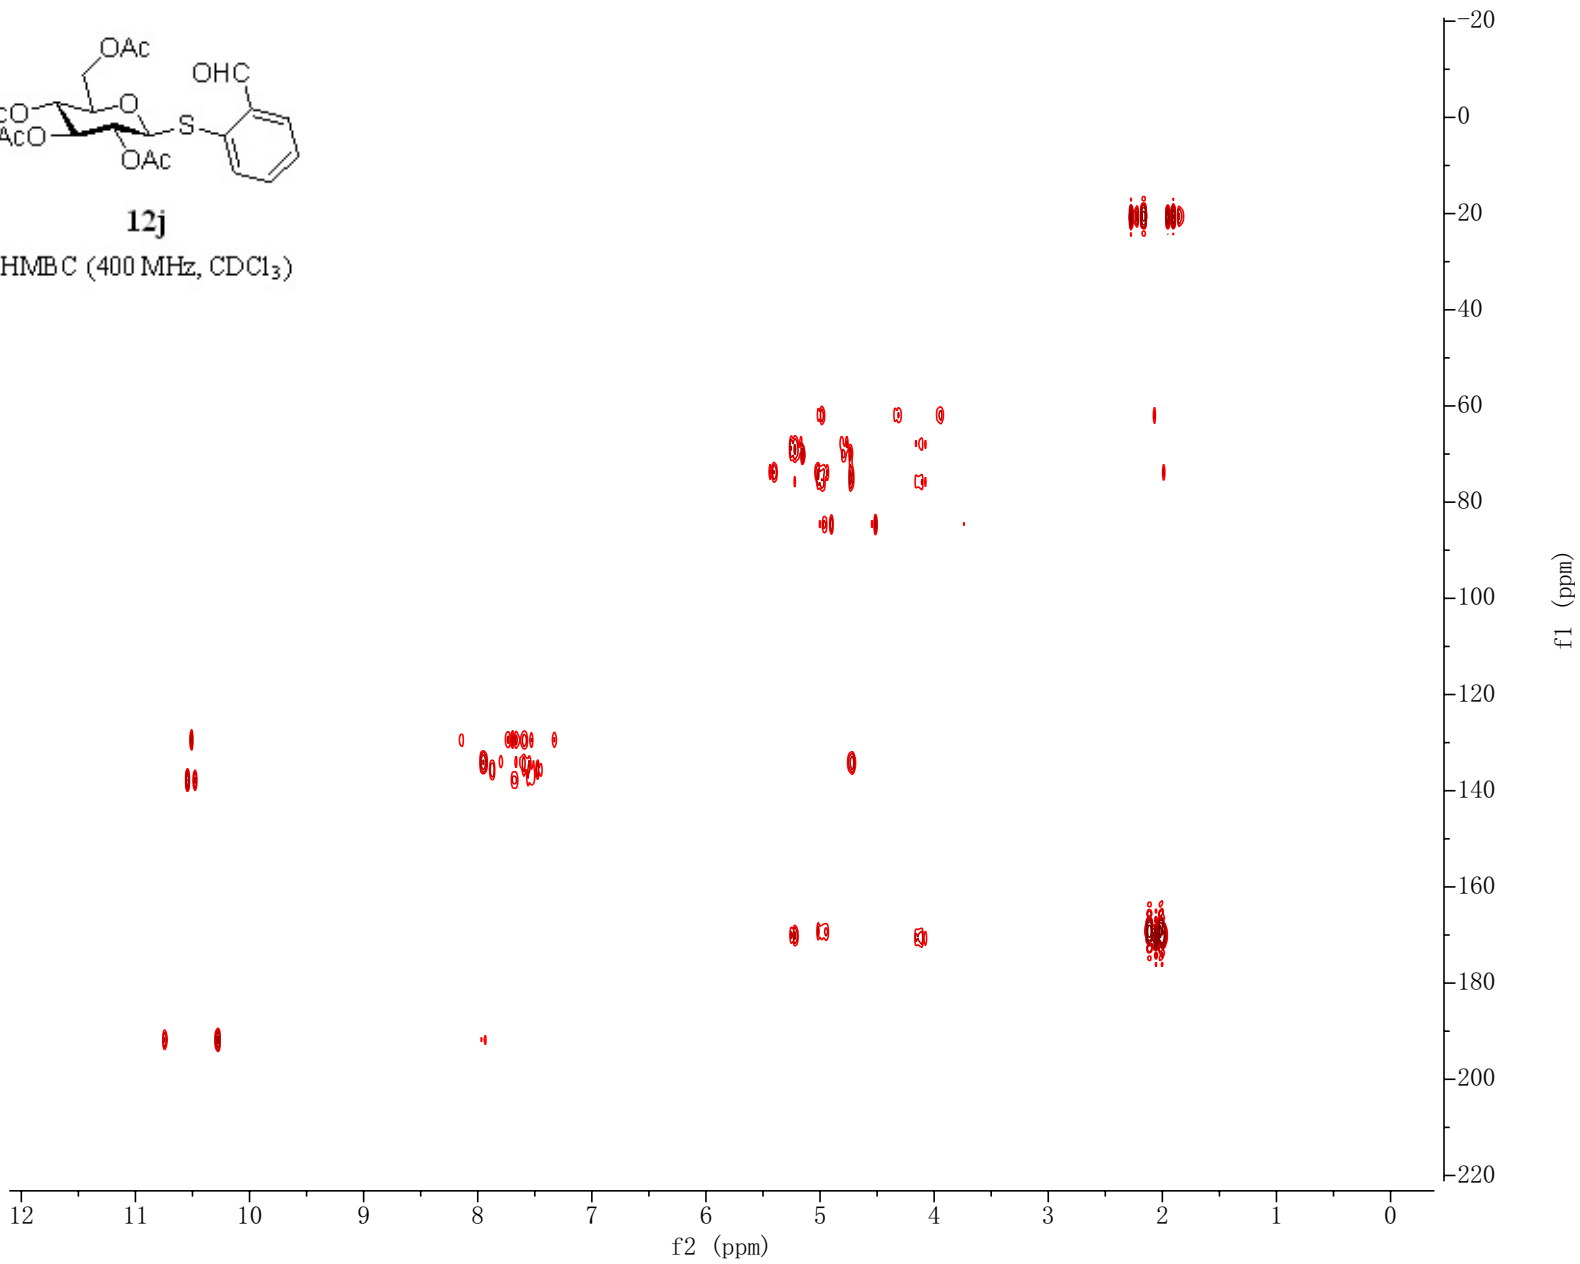

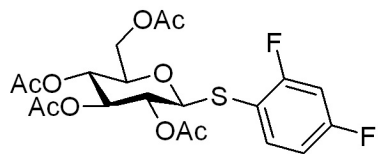

**12k**

$^1\text{H}$  NMR (400 MHz,  $\text{CDCl}_3$ )

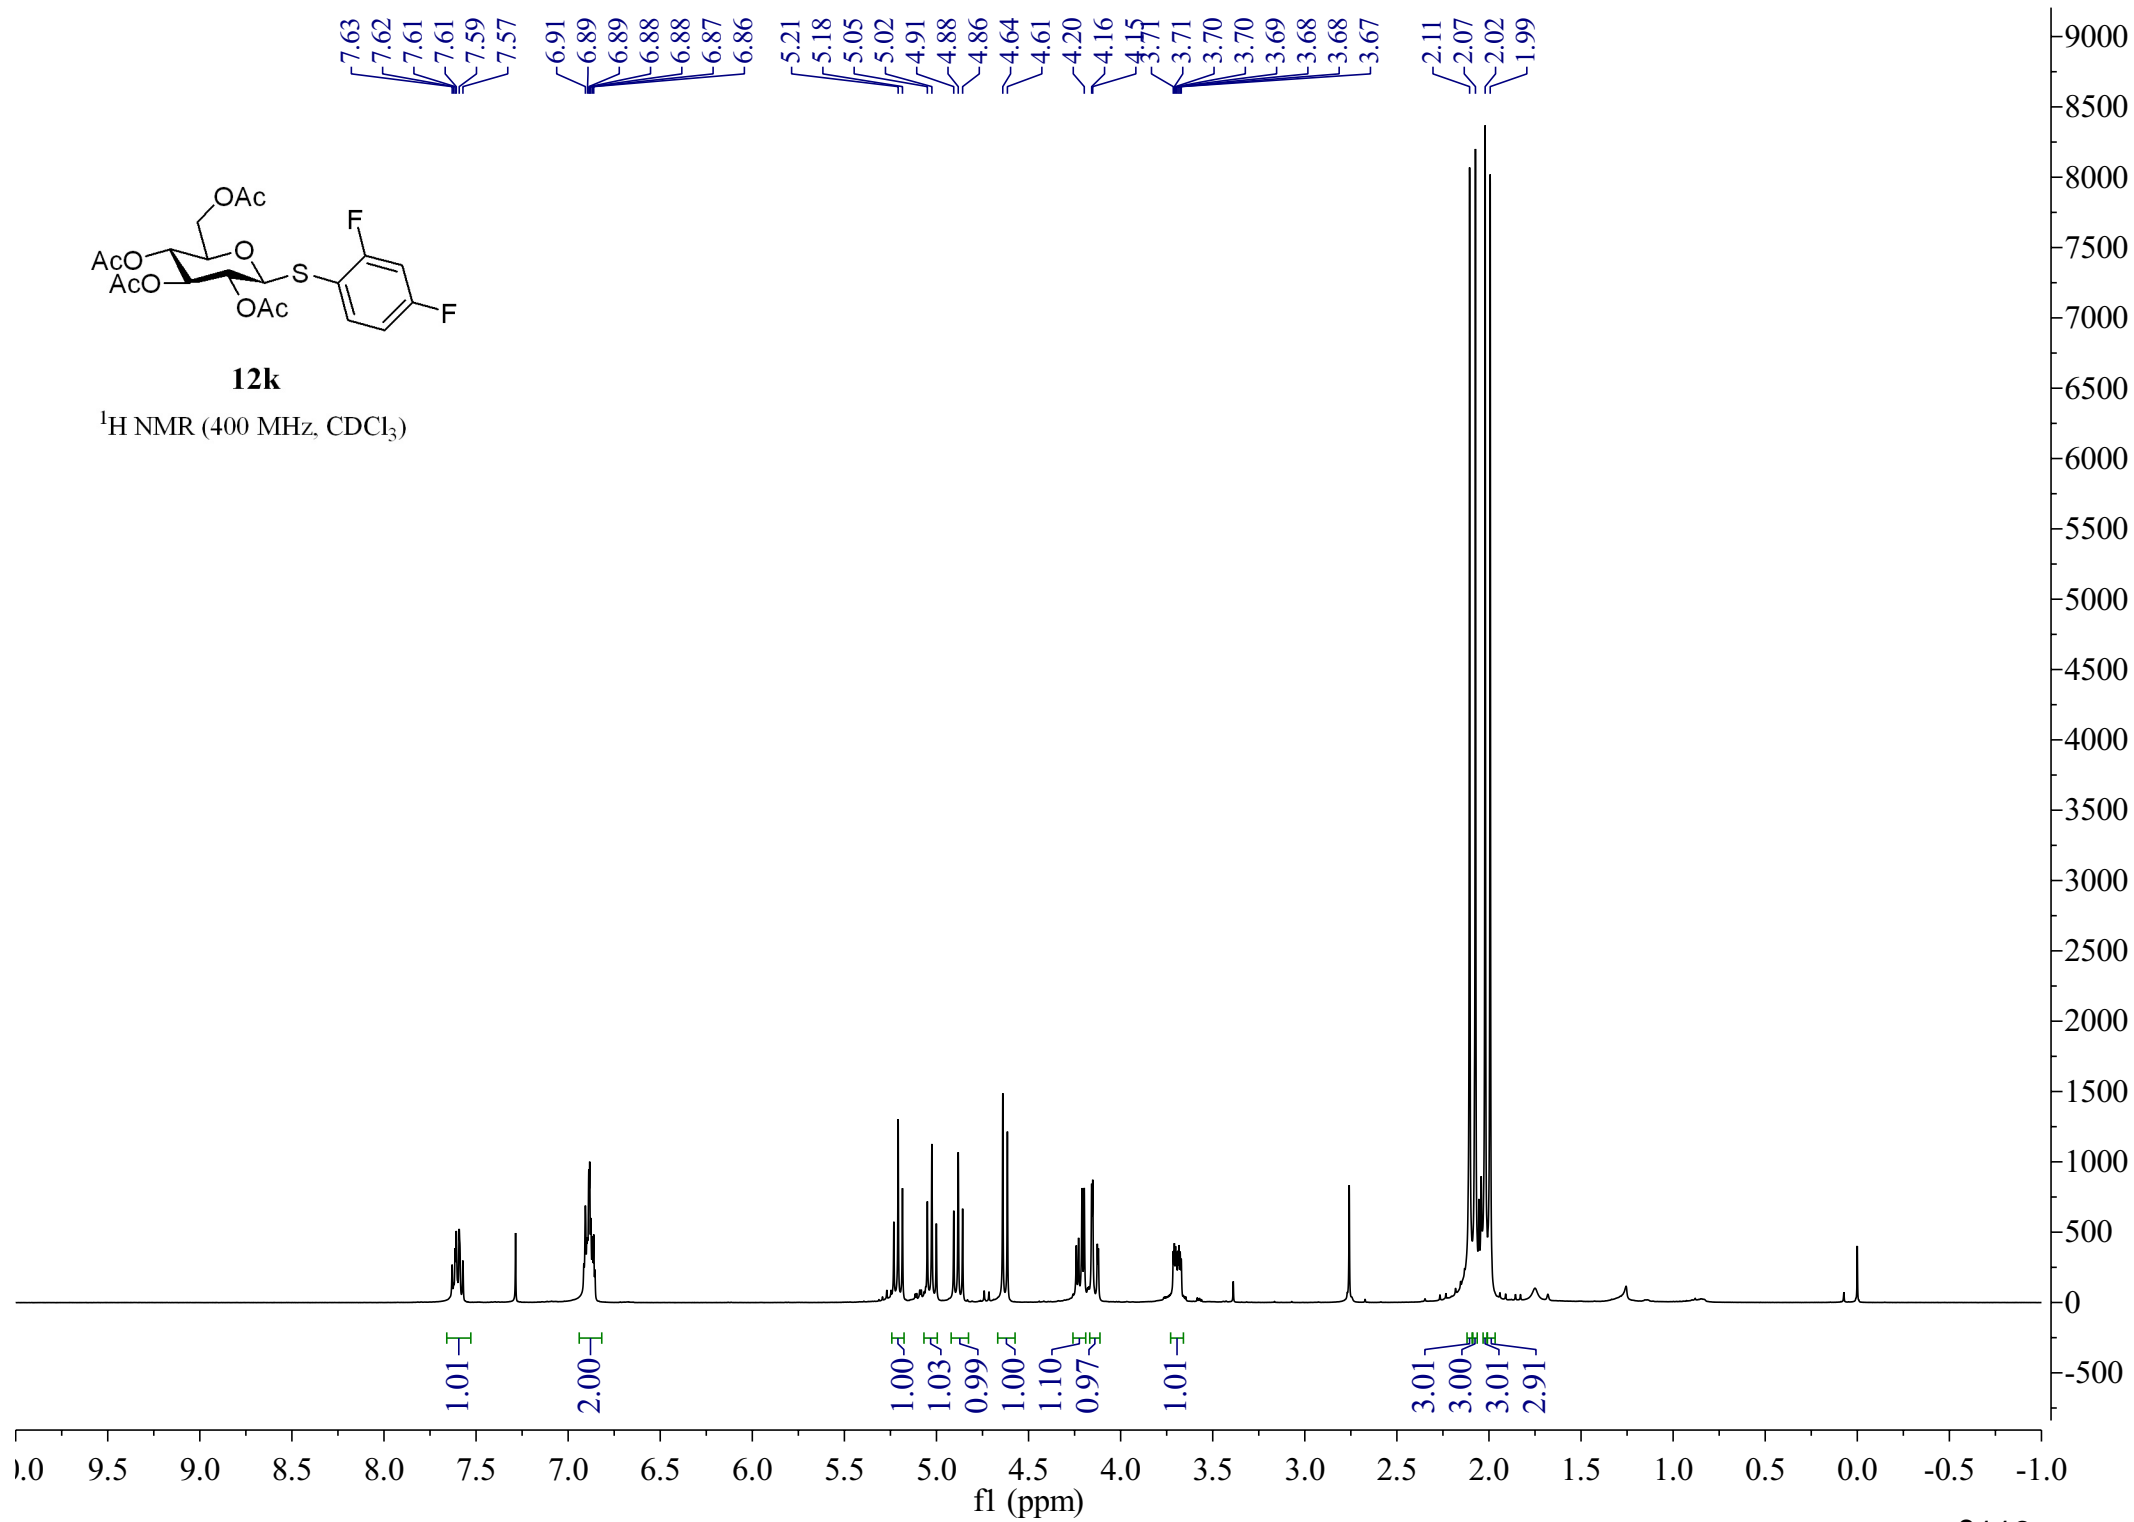



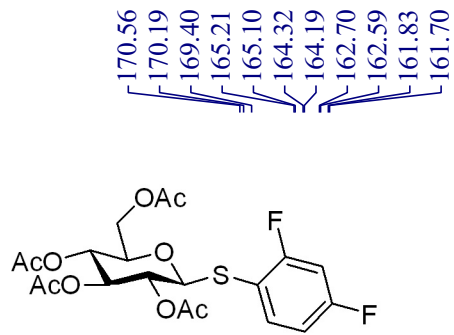

**12k**

$^{13}\text{C}\{^1\text{H}\}$  NMR (100 MHz,  $\text{CDCl}_3$ )

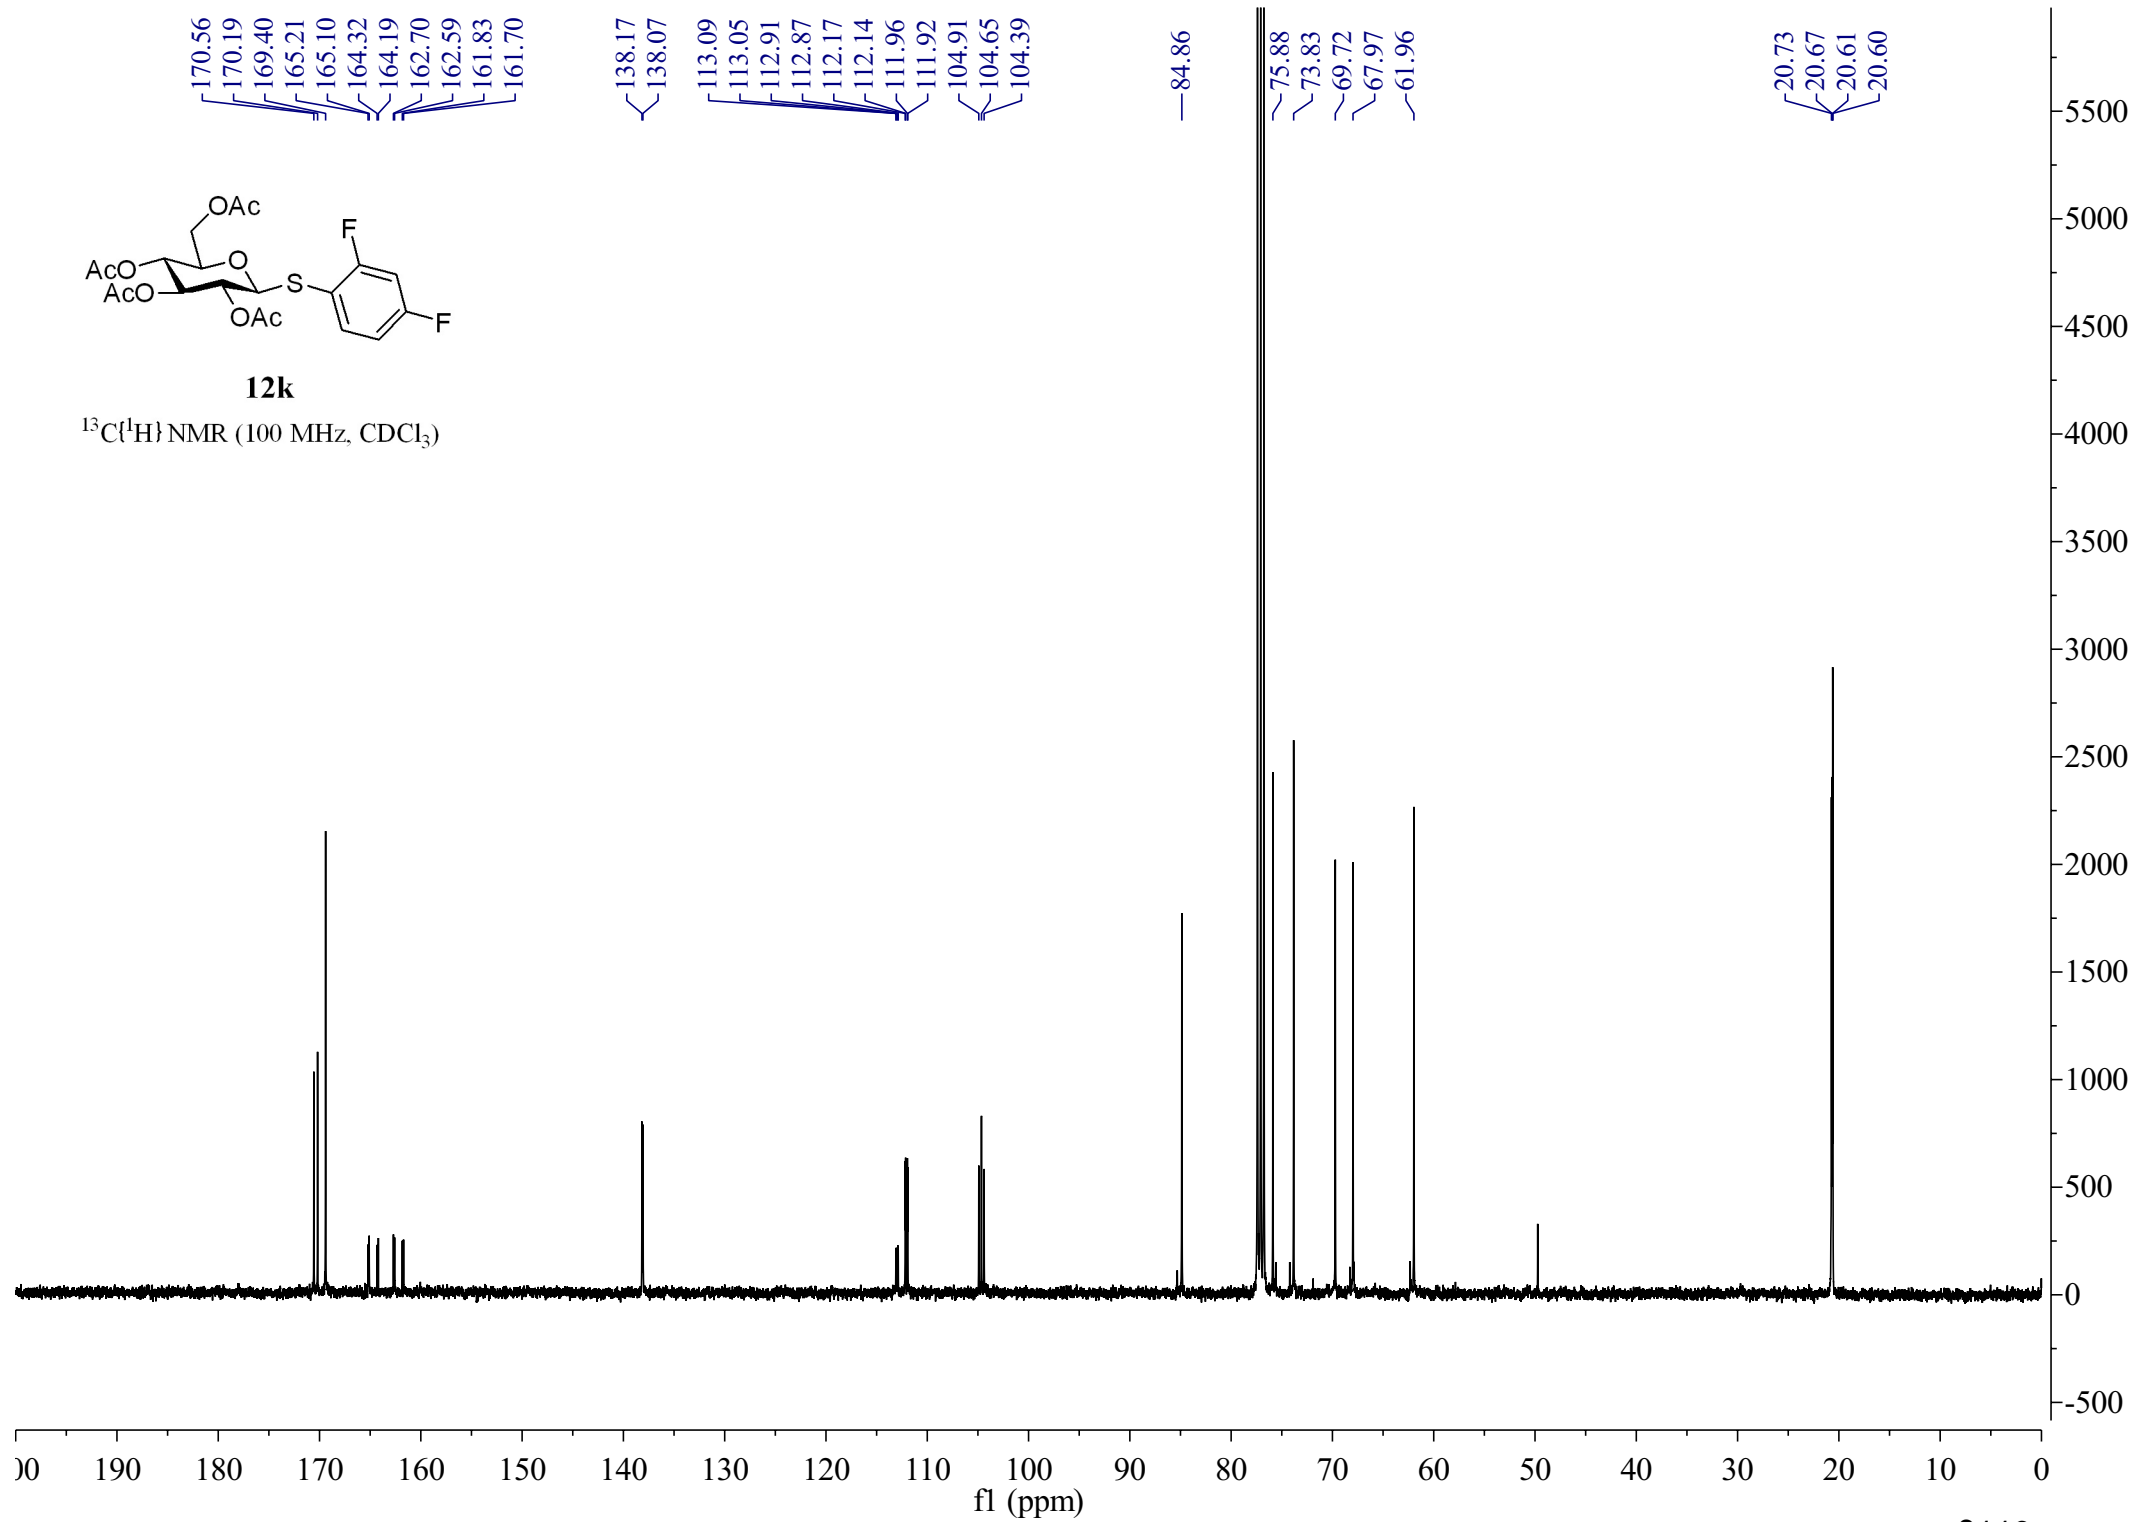

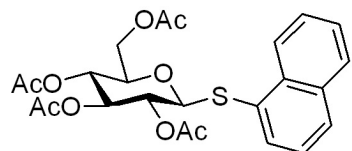

**12I**

$^1\text{H NMR}$  (400 MHz,  $\text{CDCl}_3$ )

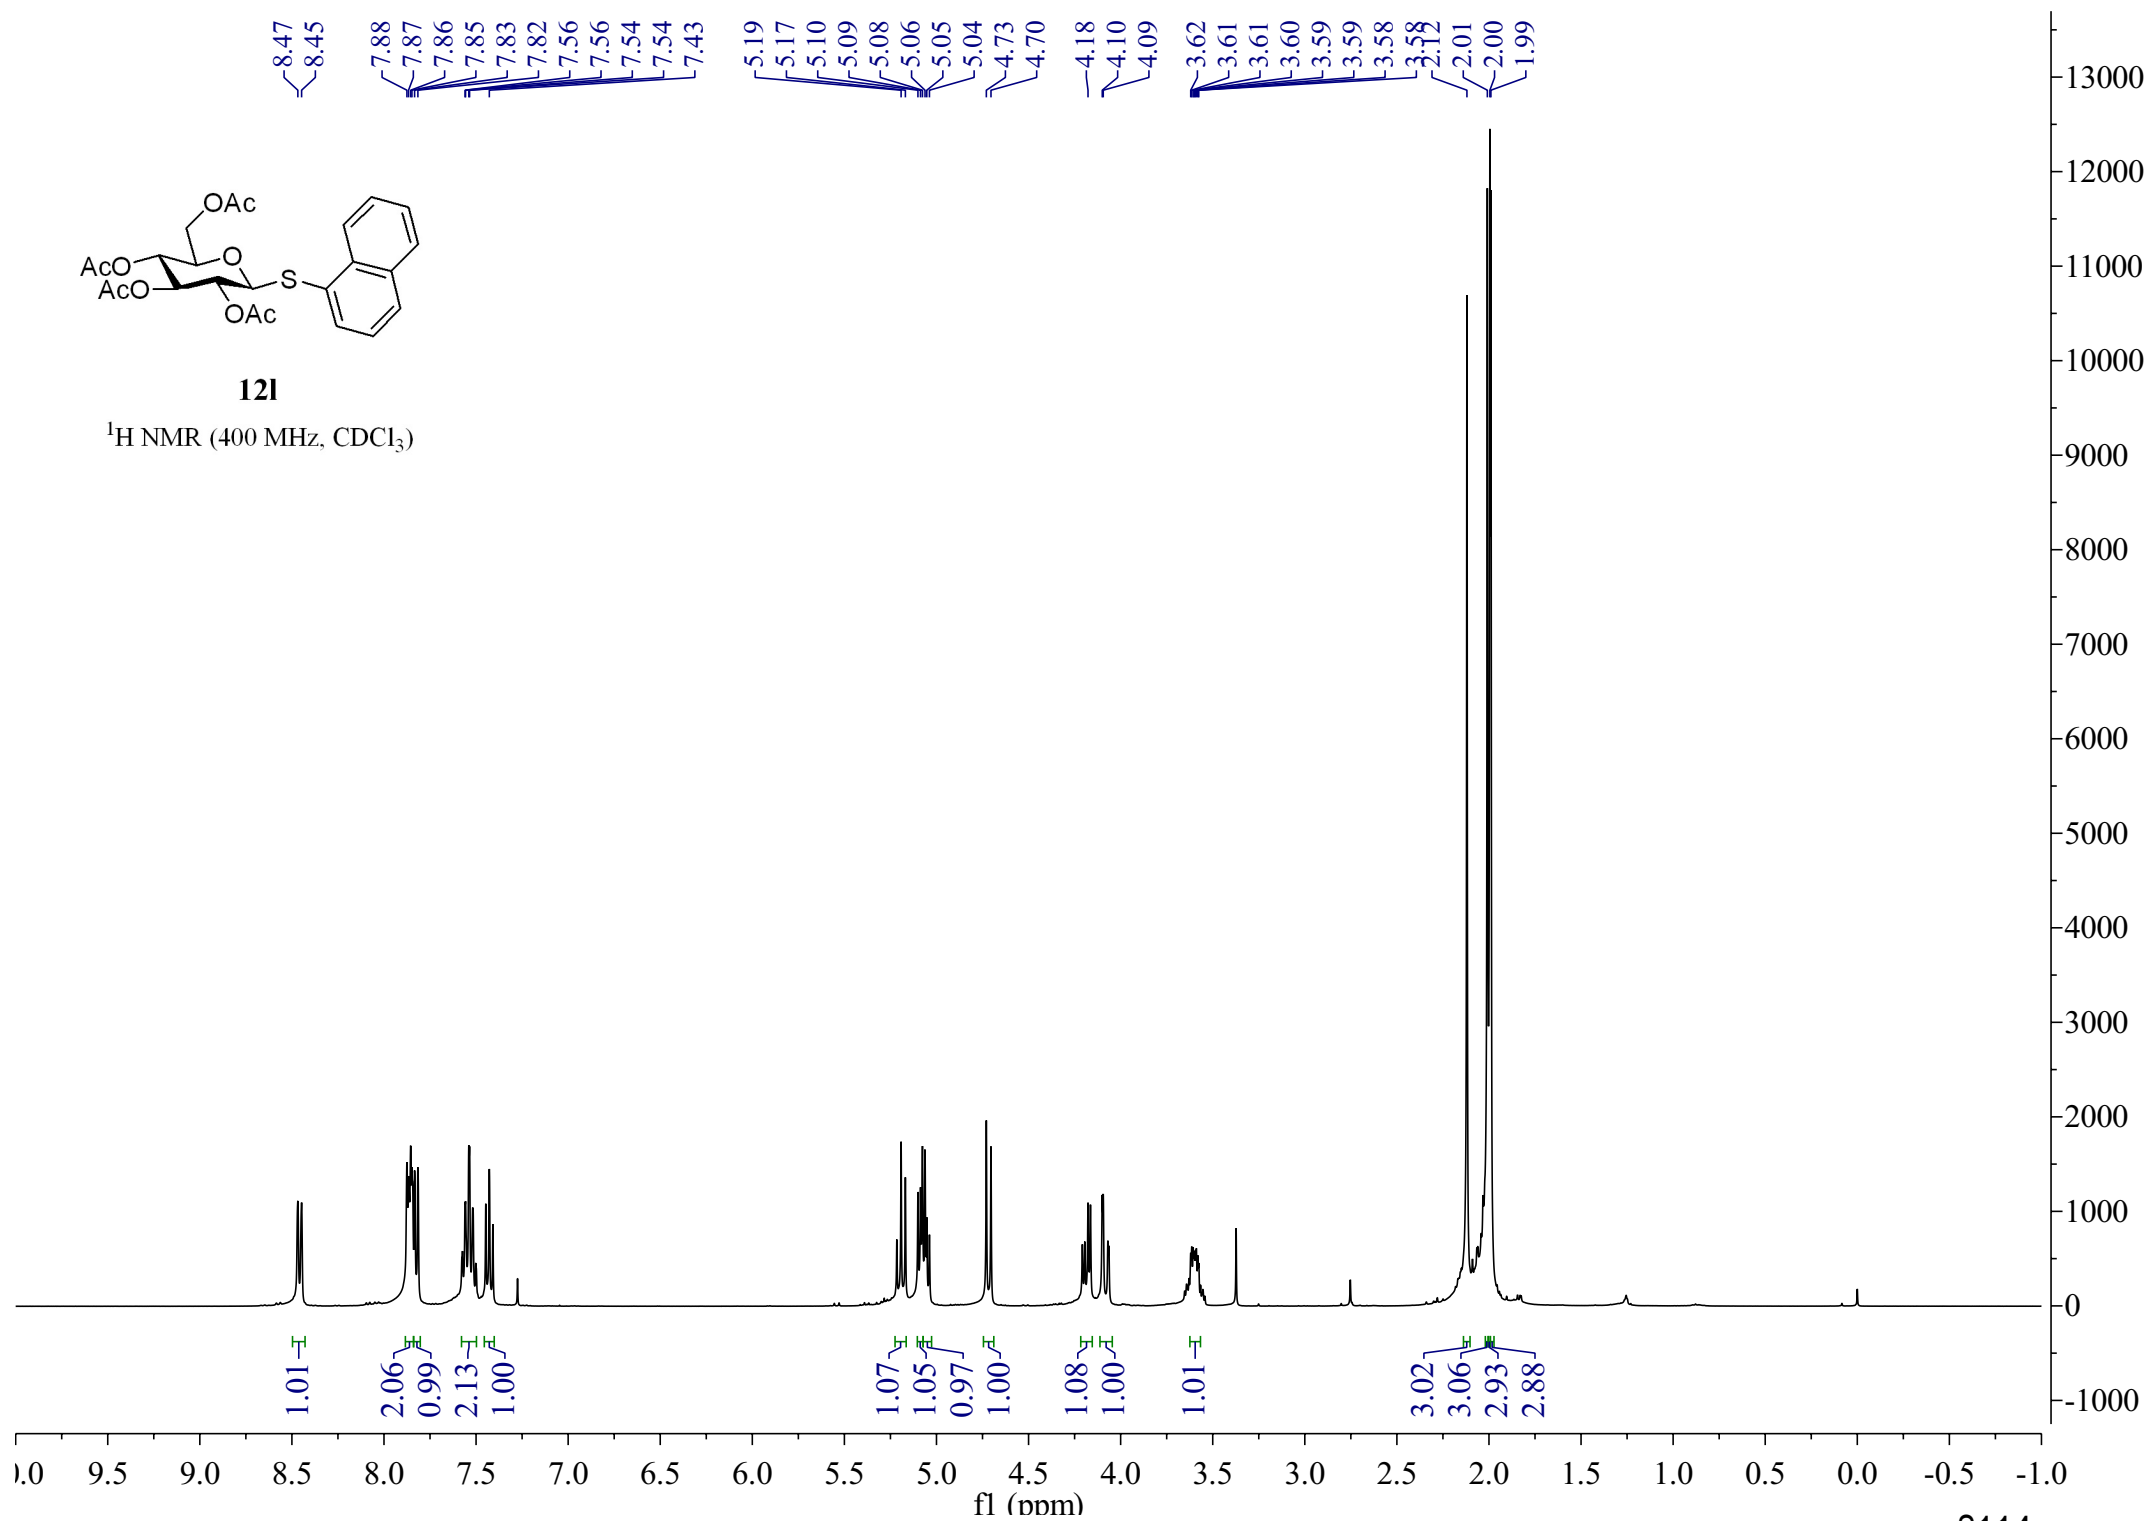

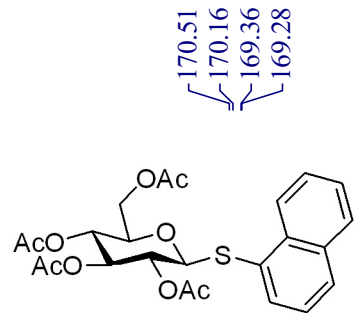

**121**

$^{13}\text{C}\{^1\text{H}\}$  NMR (100 MHz,  $\text{CDCl}_3$ )

170.51  
170.16  
169.36  
169.28

134.30  
134.09  
133.52  
129.87  
129.22  
128.53  
126.79  
126.40  
125.77  
125.53

86.58

75.72  
74.03  
70.38  
68.24  
62.15

20.79  
20.66  
20.58  
20.55

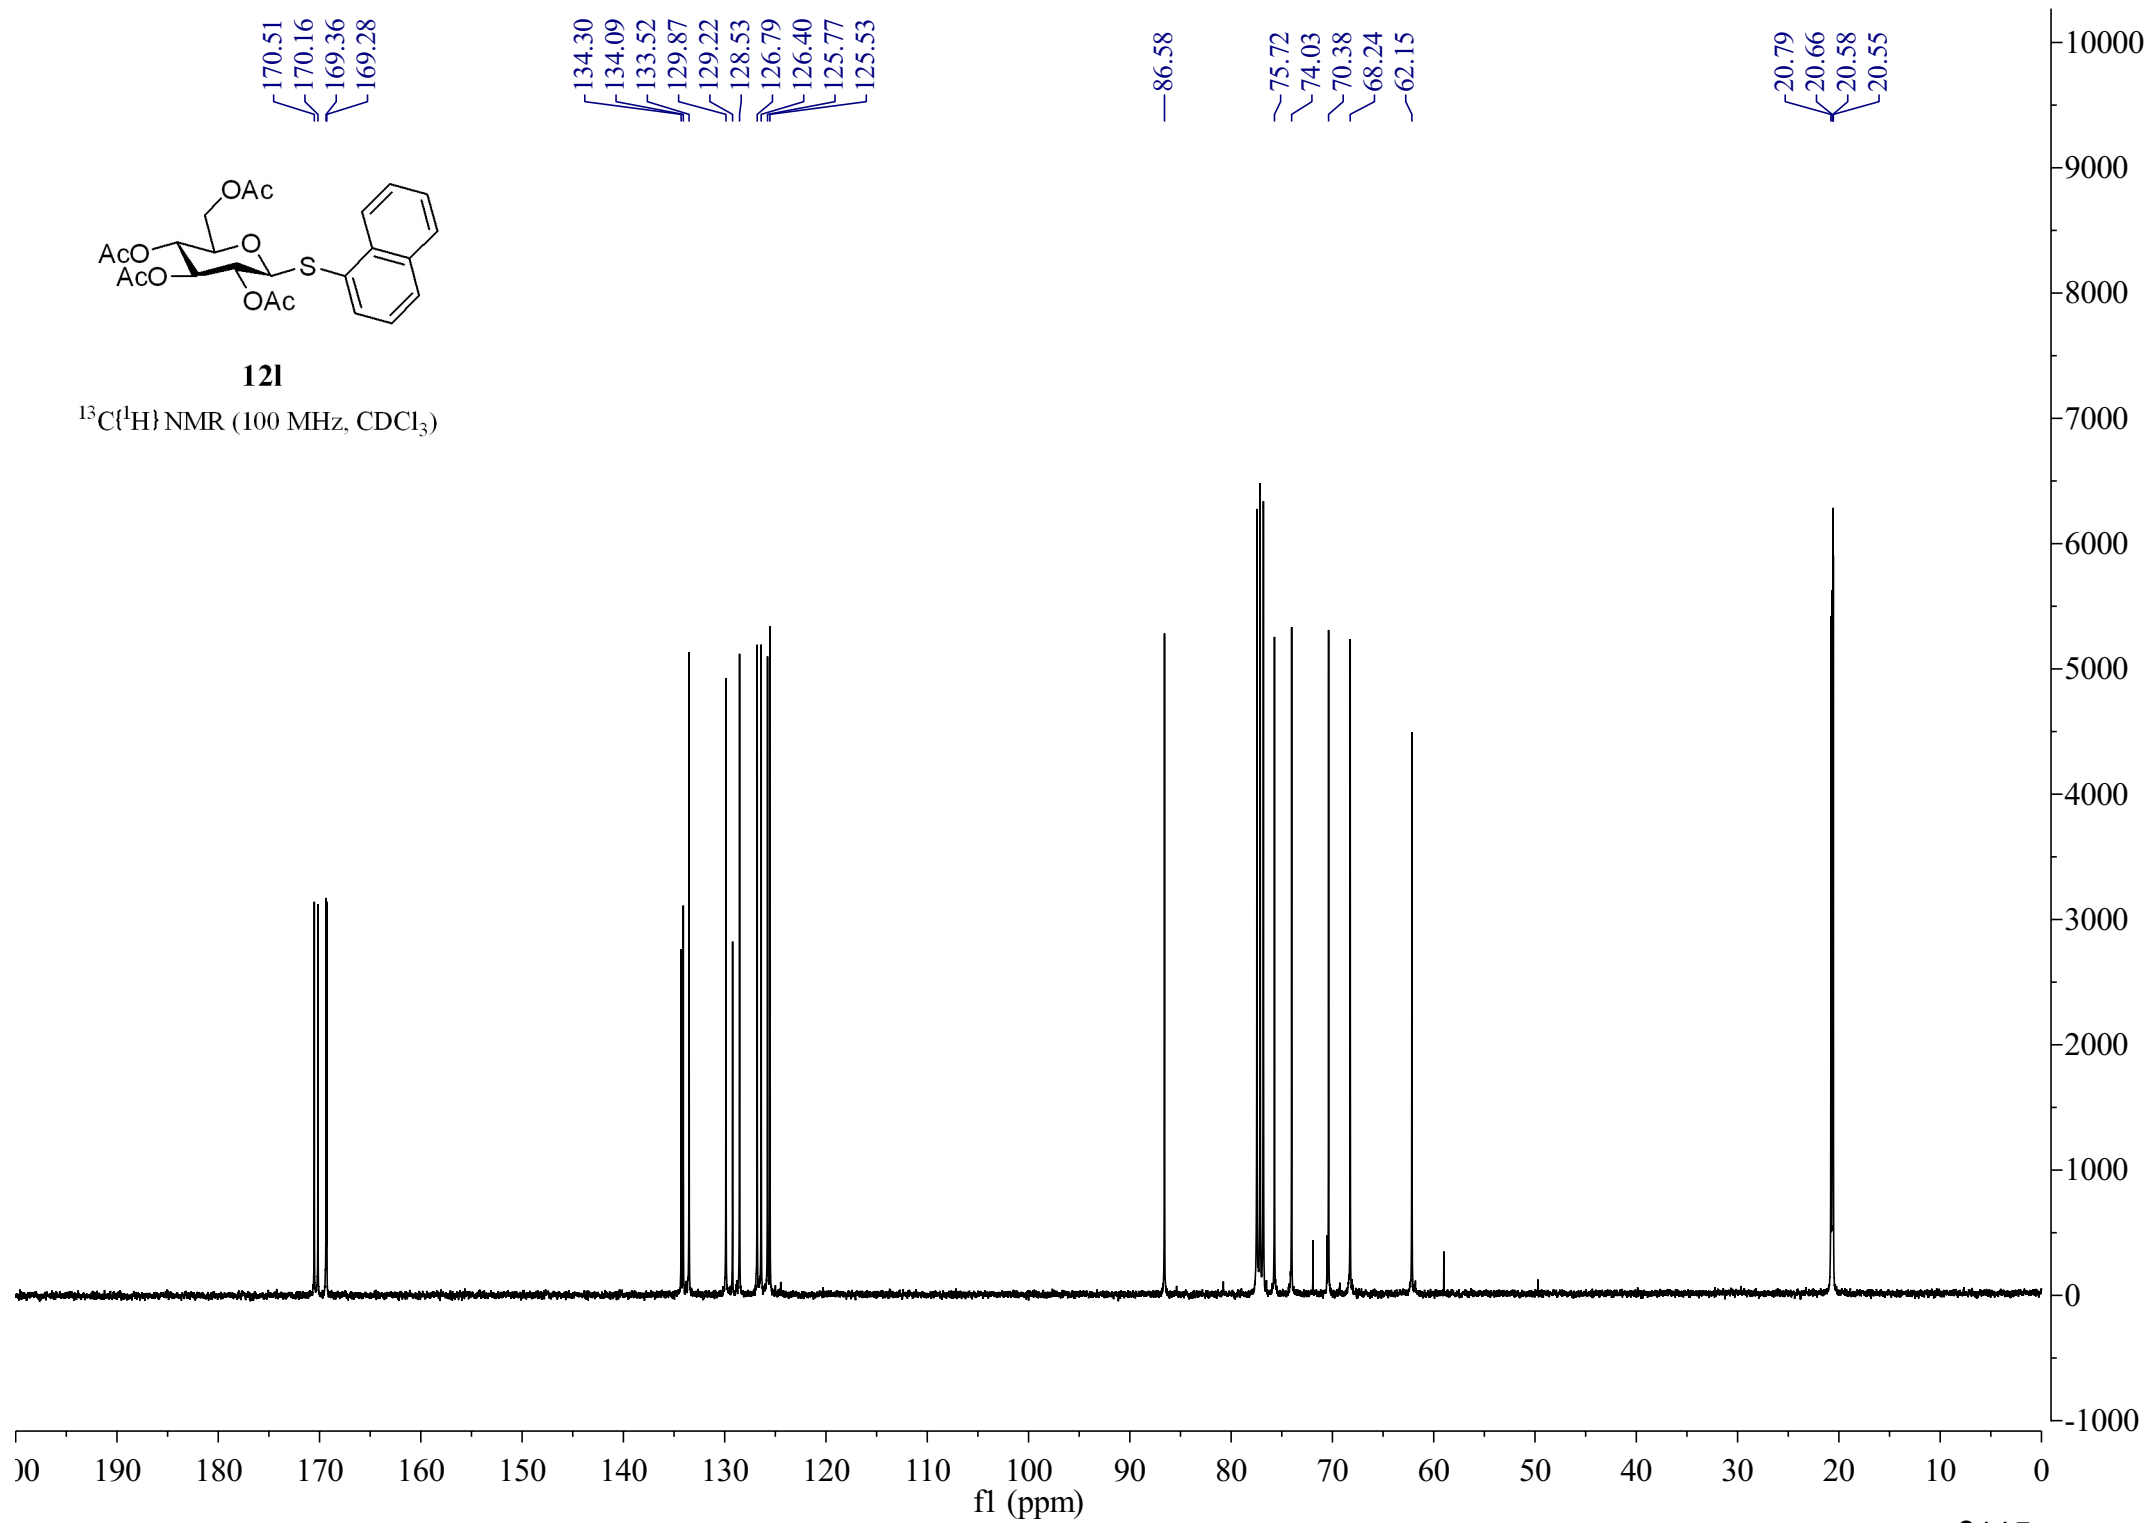

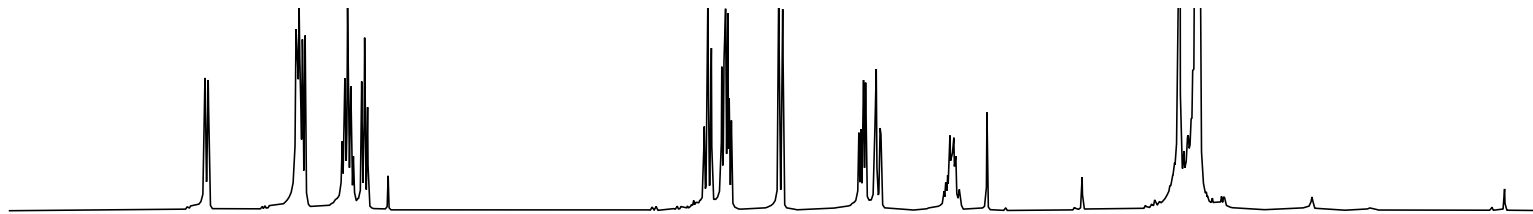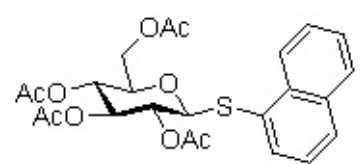

121

$^1\text{H}$ - $^1\text{H}$  COSY (400 MHz,  $\text{CDCl}_3$ )

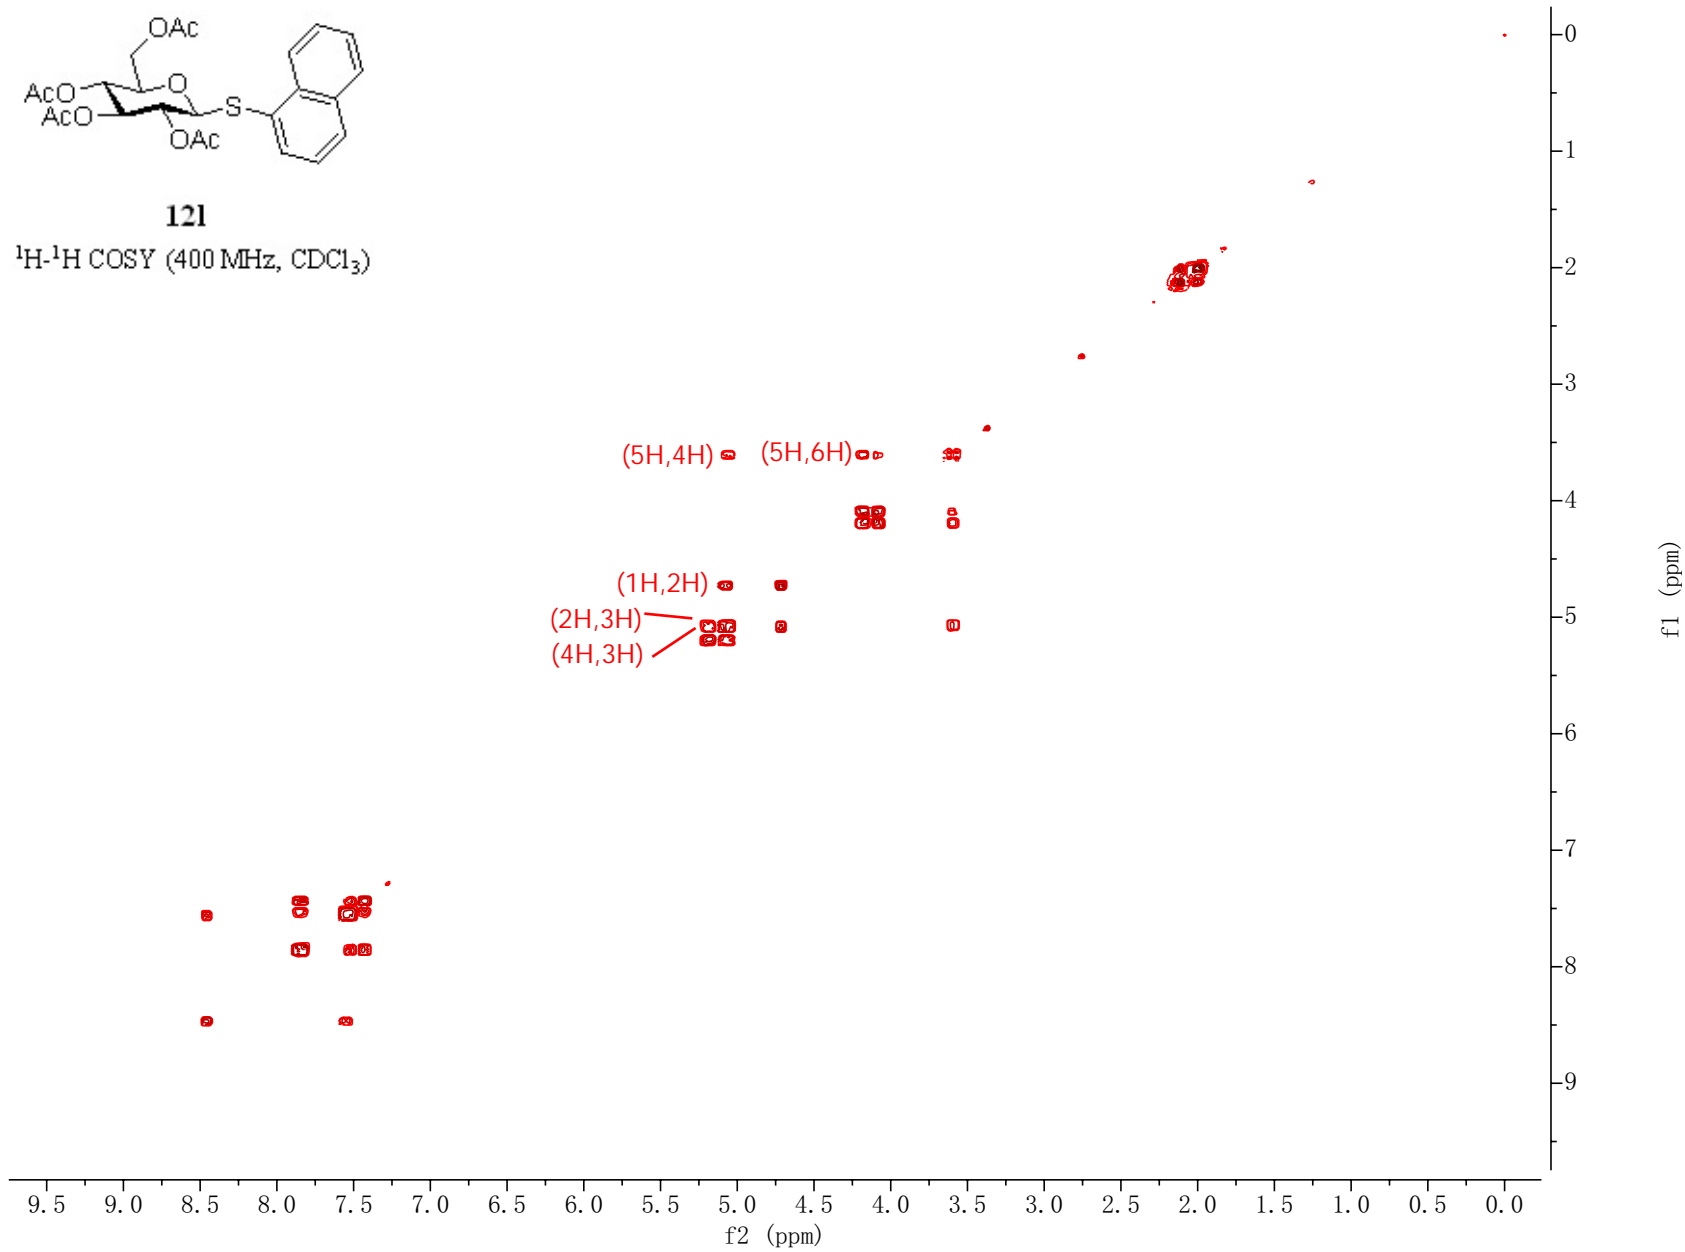

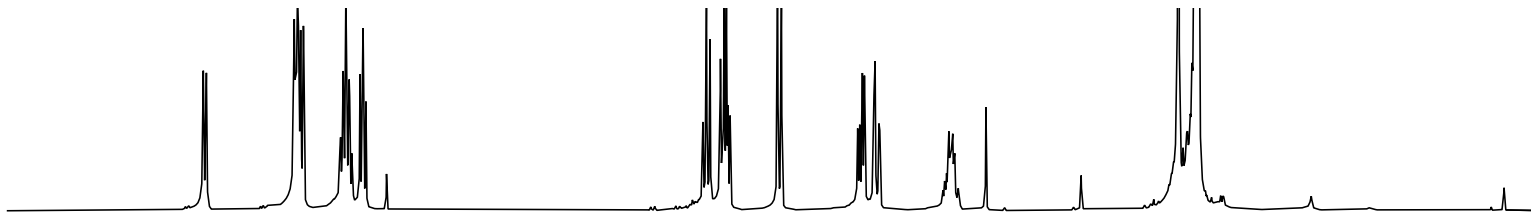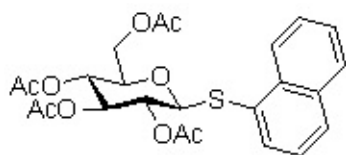

**121**

HSQC (400 MHz, CDCl<sub>3</sub>)

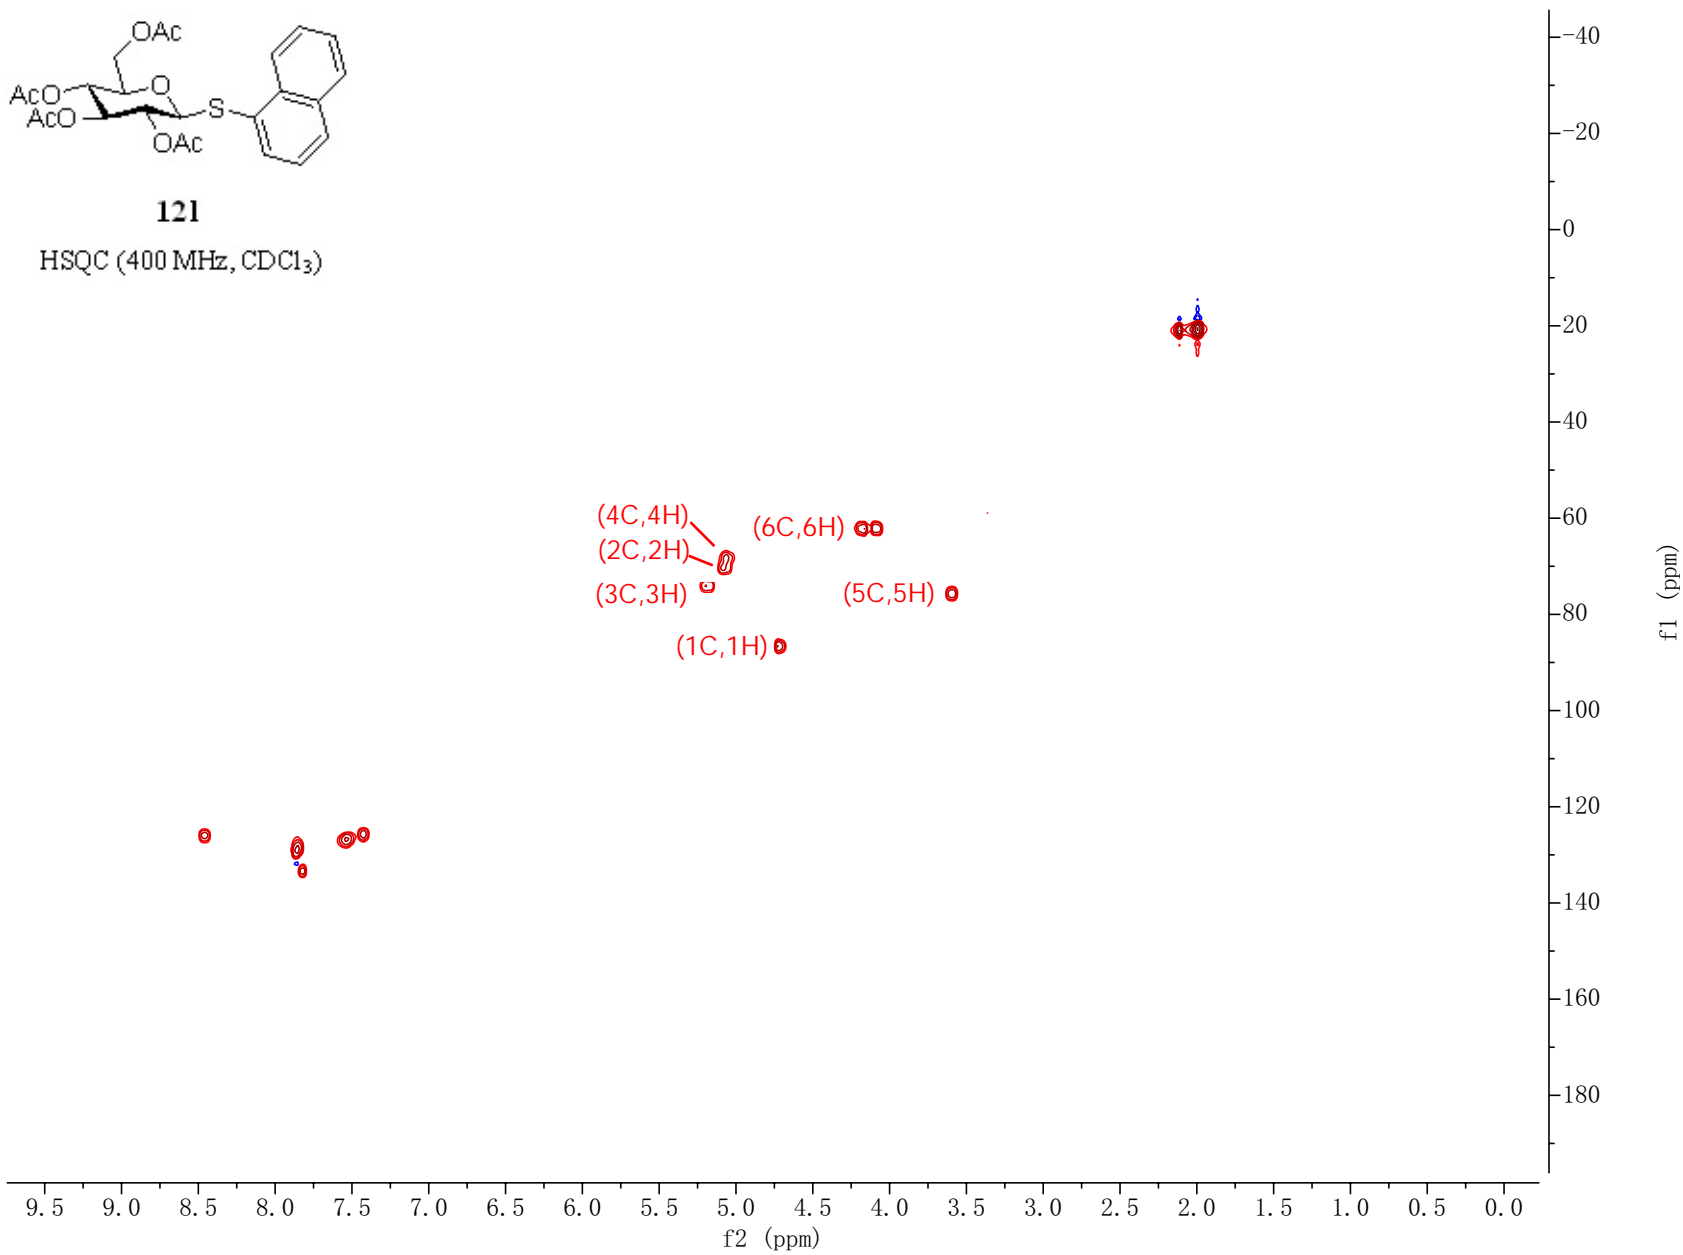

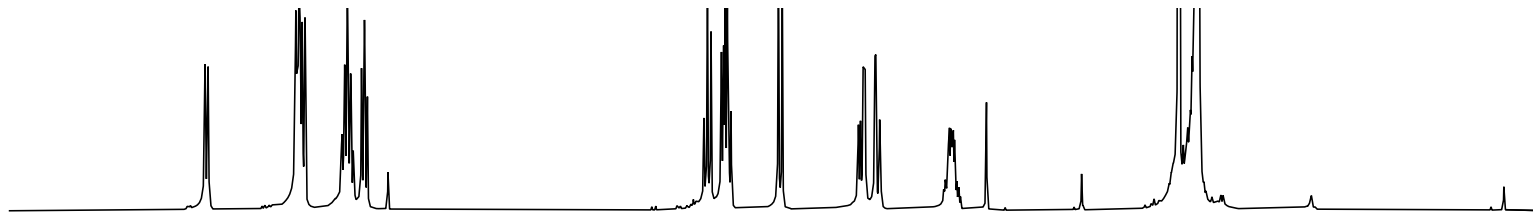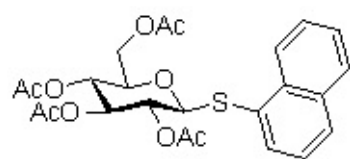

121

HMBC (400 MHz, CDCl<sub>3</sub>)

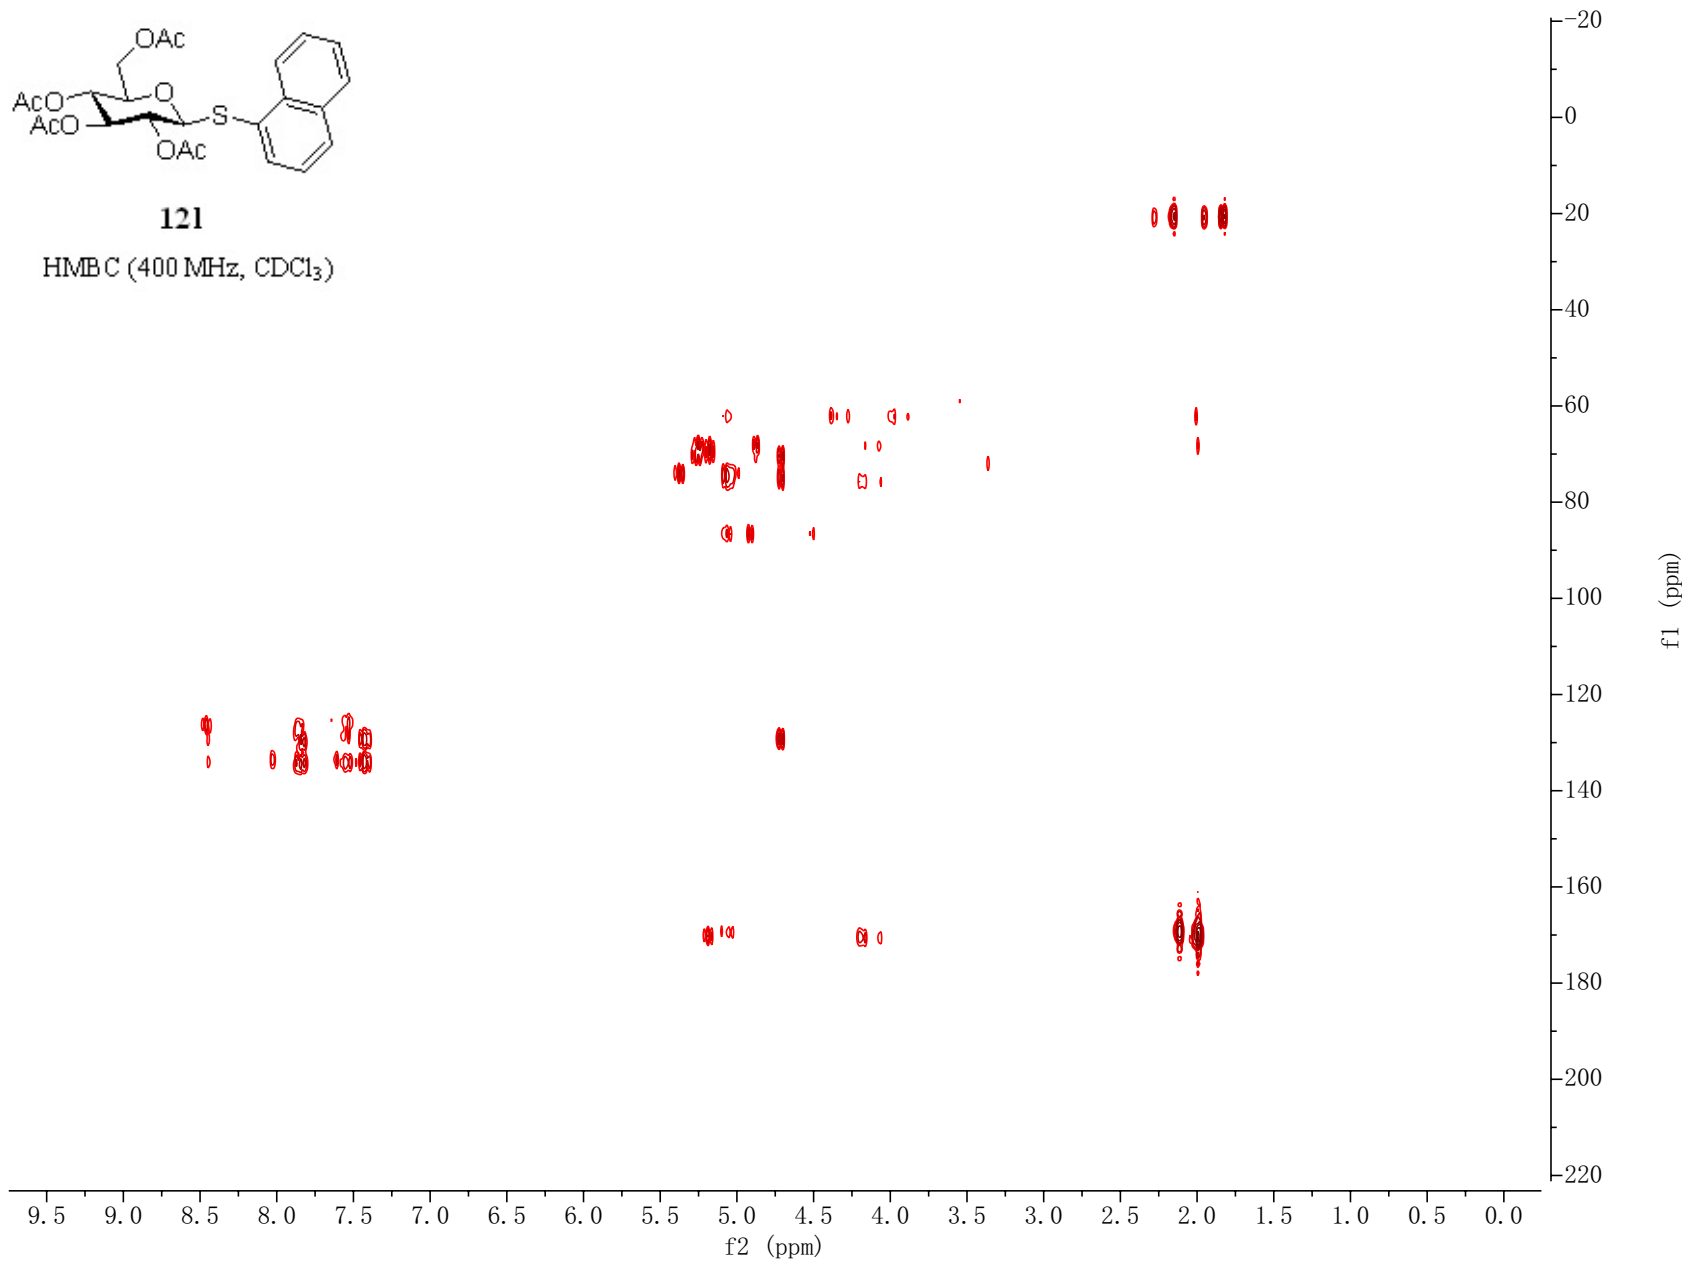

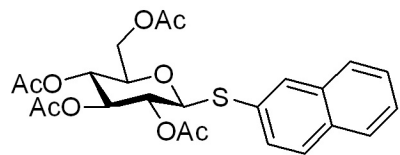

**12m**

$^1\text{H}$  NMR (400 MHz,  $\text{CDCl}_3$ )

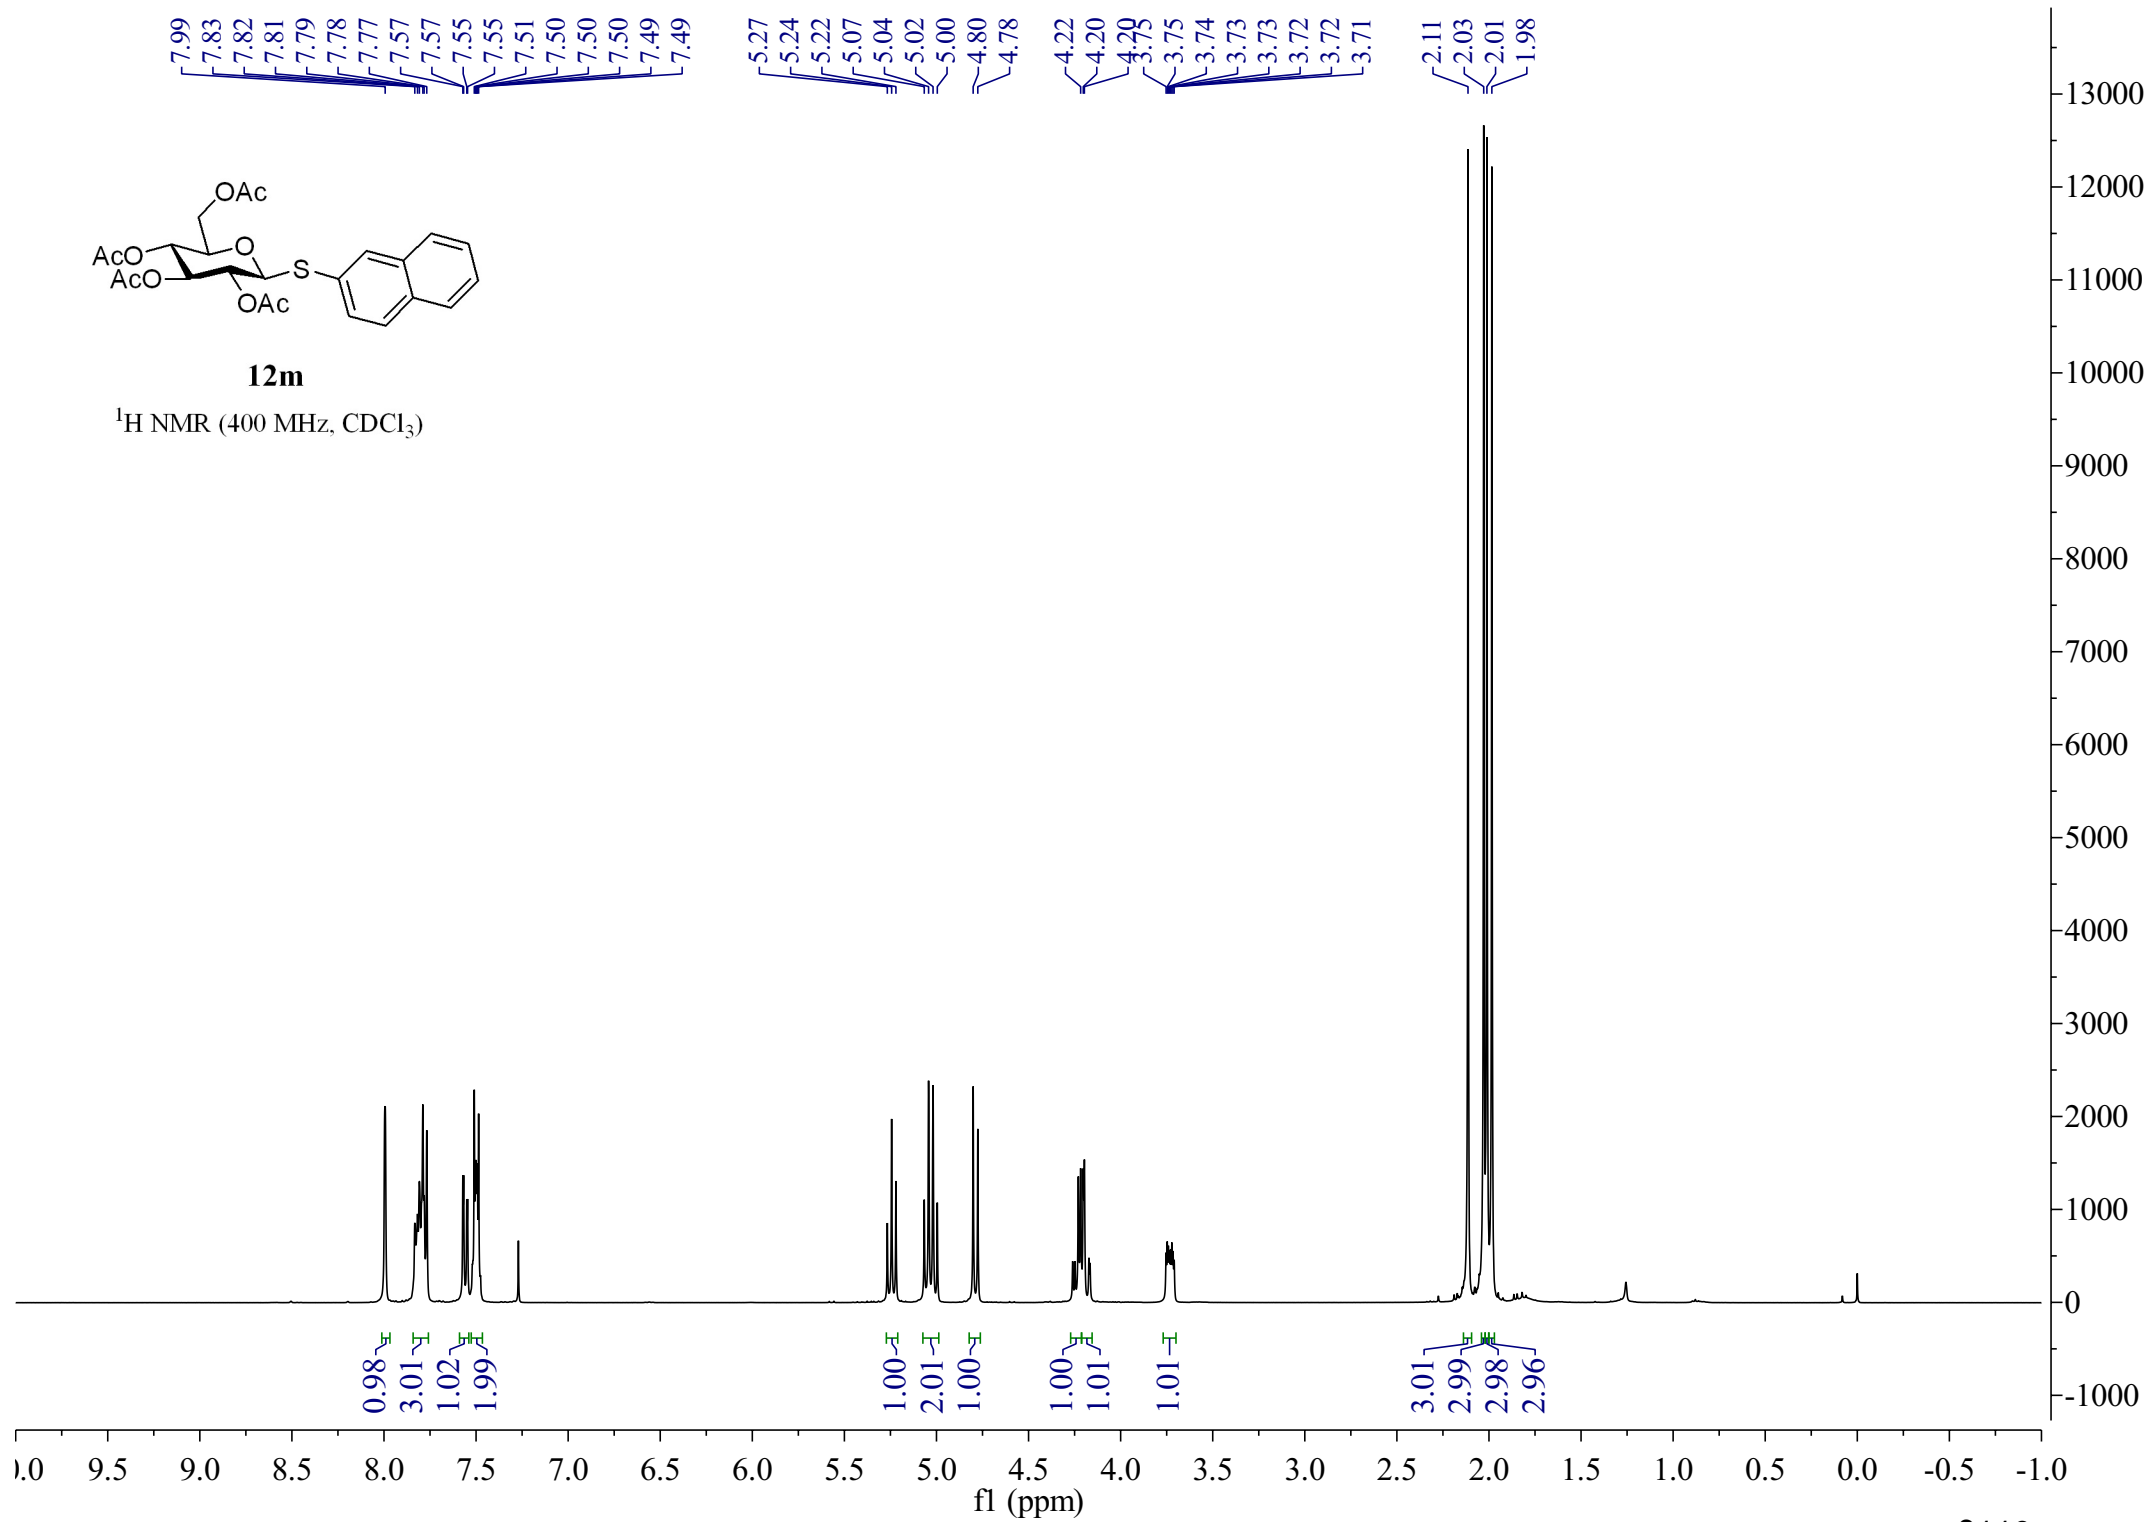

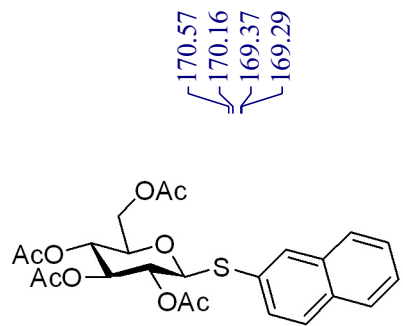

**12m**

$^{13}\text{C}\{^1\text{H}\}$  NMR (100 MHz,  $\text{CDCl}_3$ )

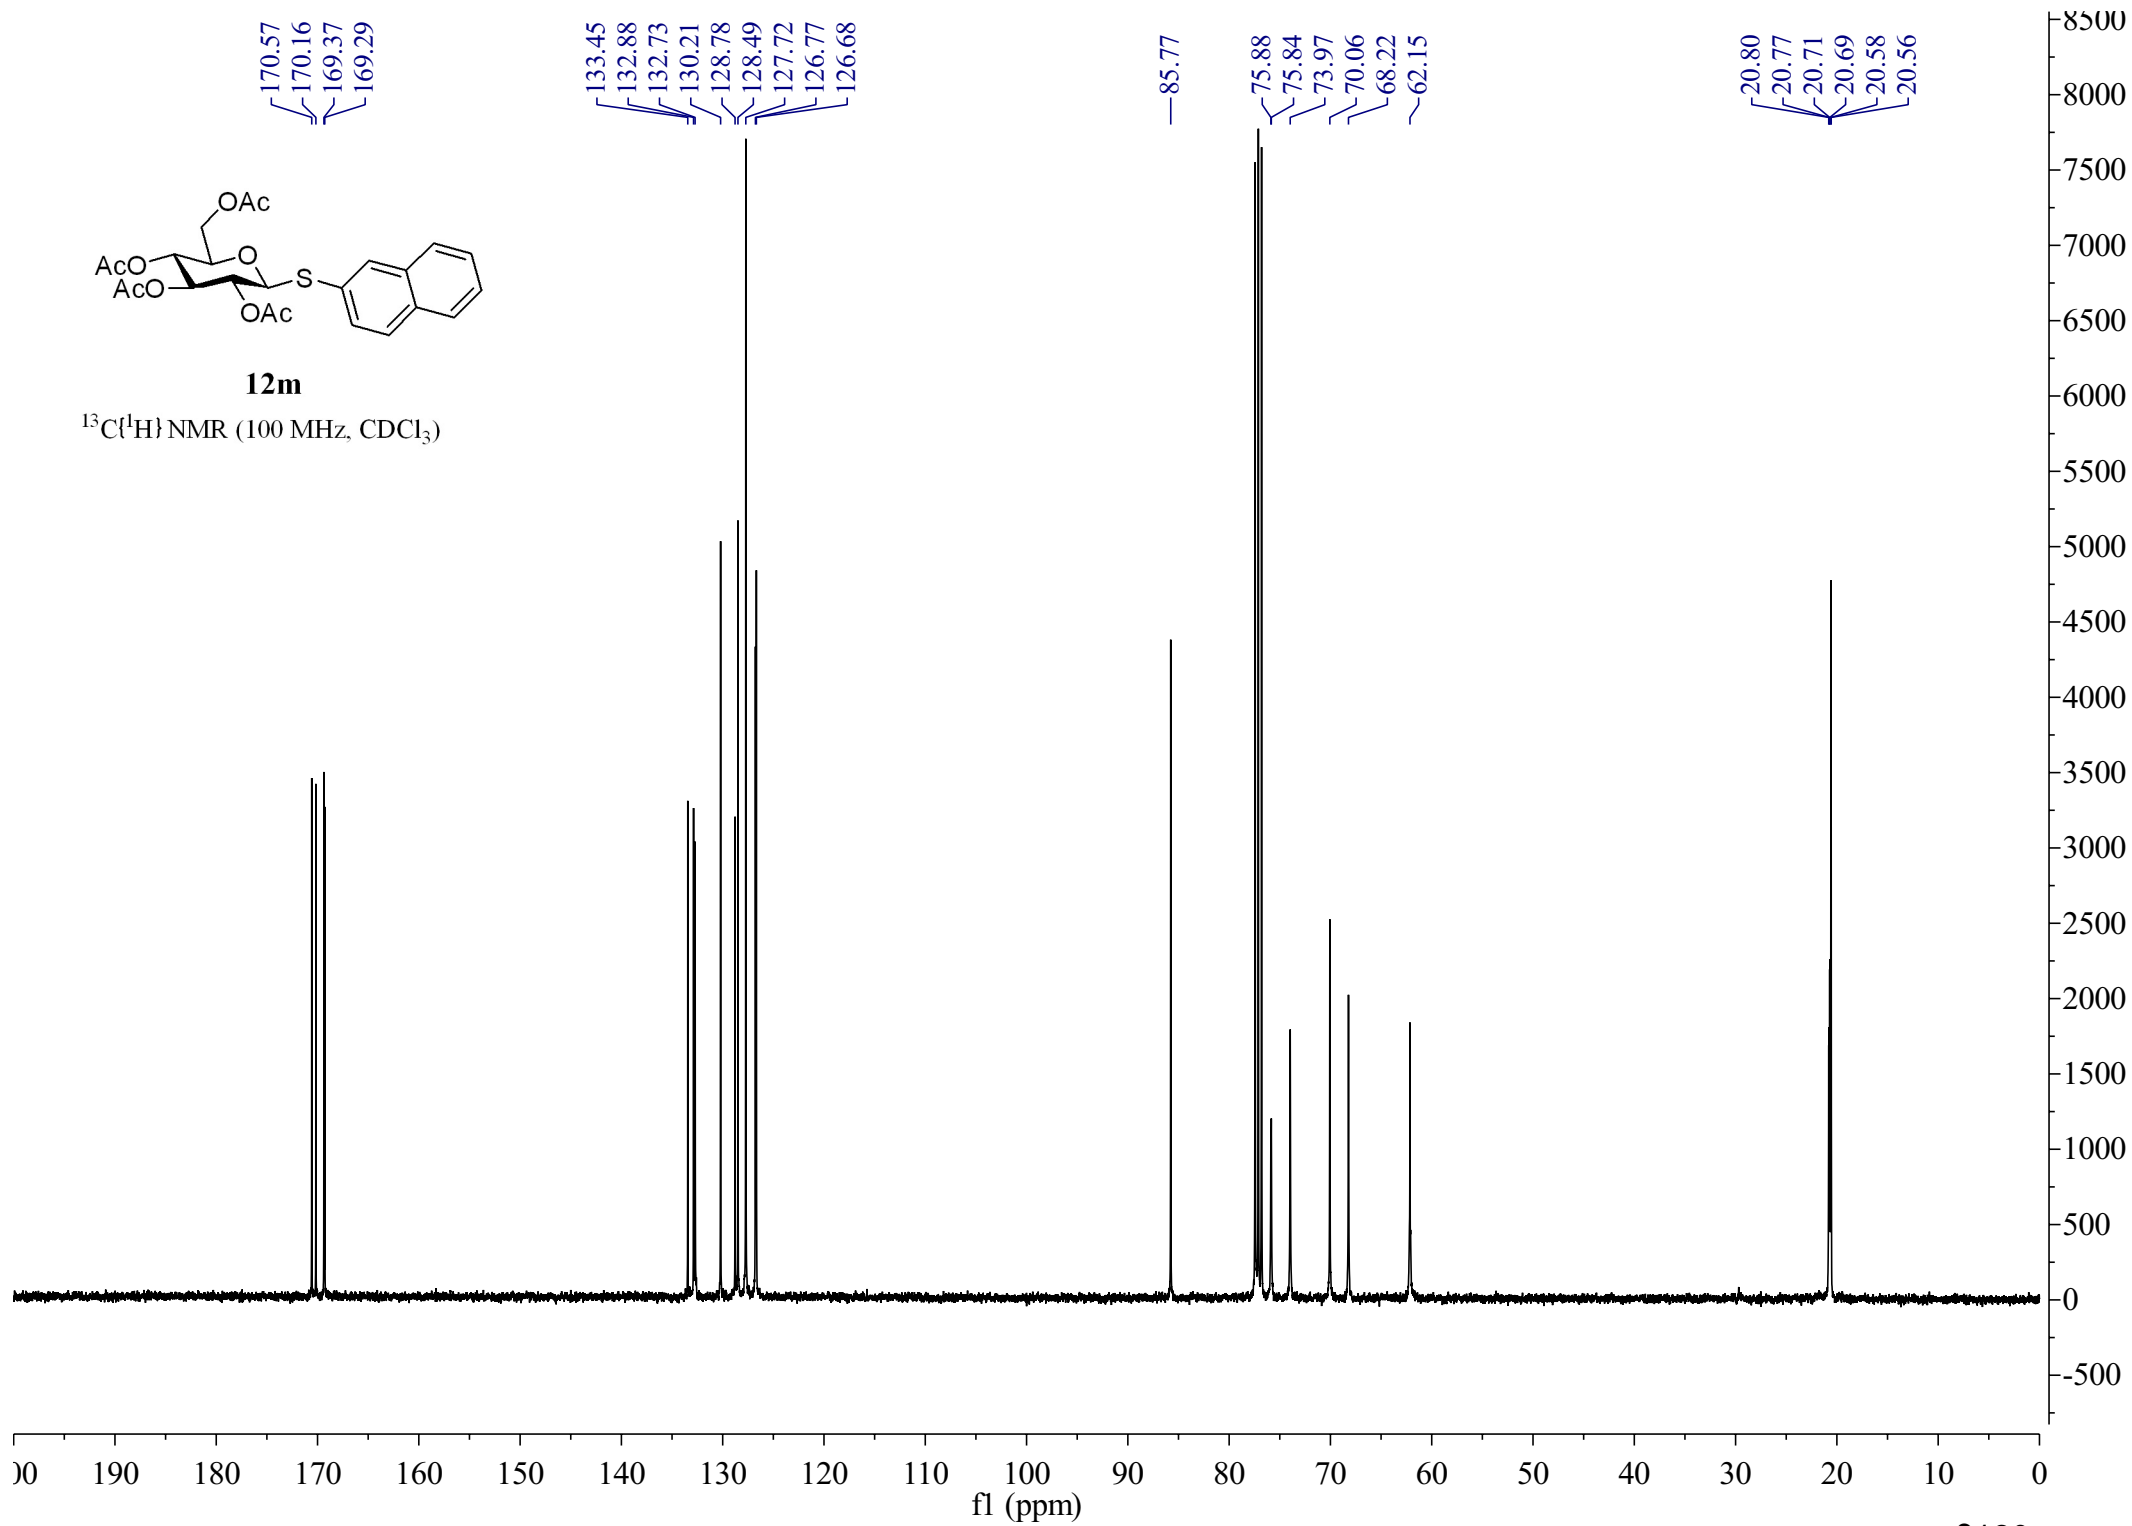



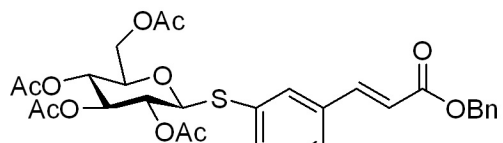

**12n**

$^1\text{H NMR}$  (400 MHz,  $\text{CDCl}_3$ )

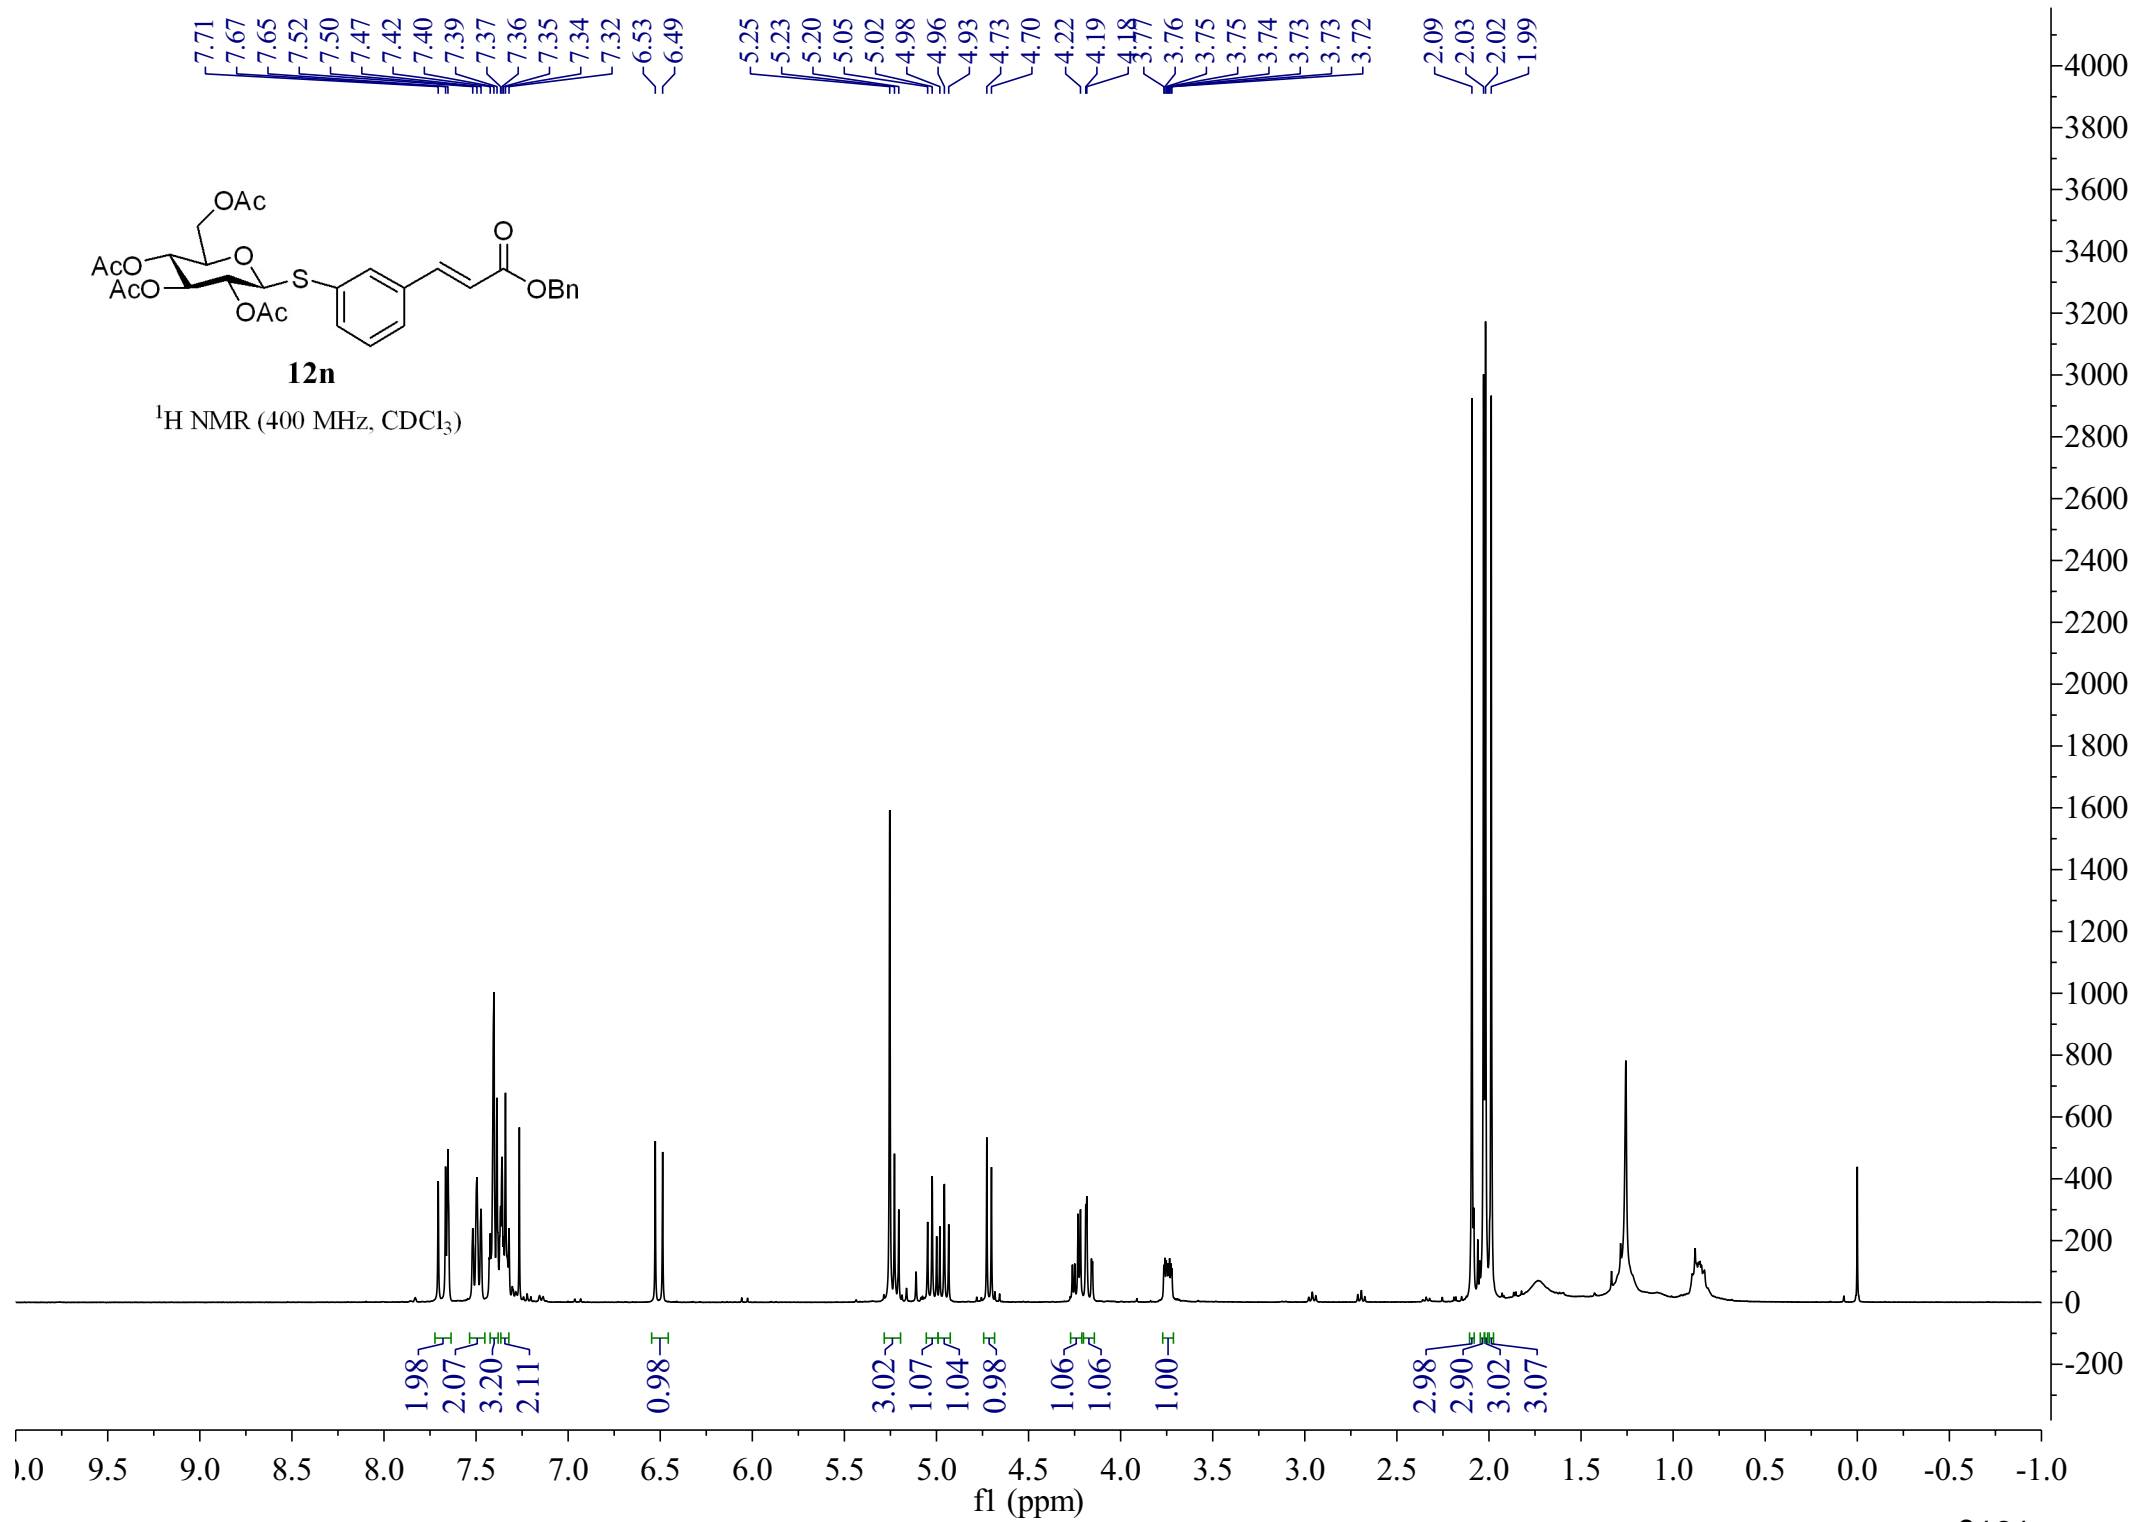

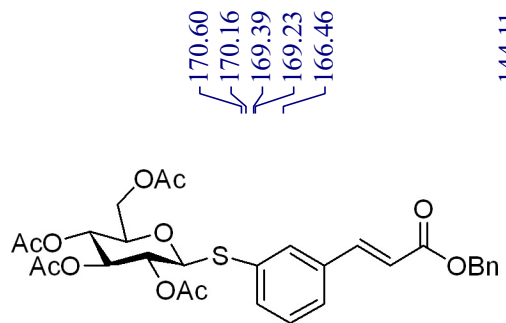

**12n**

$^{13}\text{C}\{^1\text{H}\}$  NMR (100 MHz,  $\text{CDCl}_3$ )

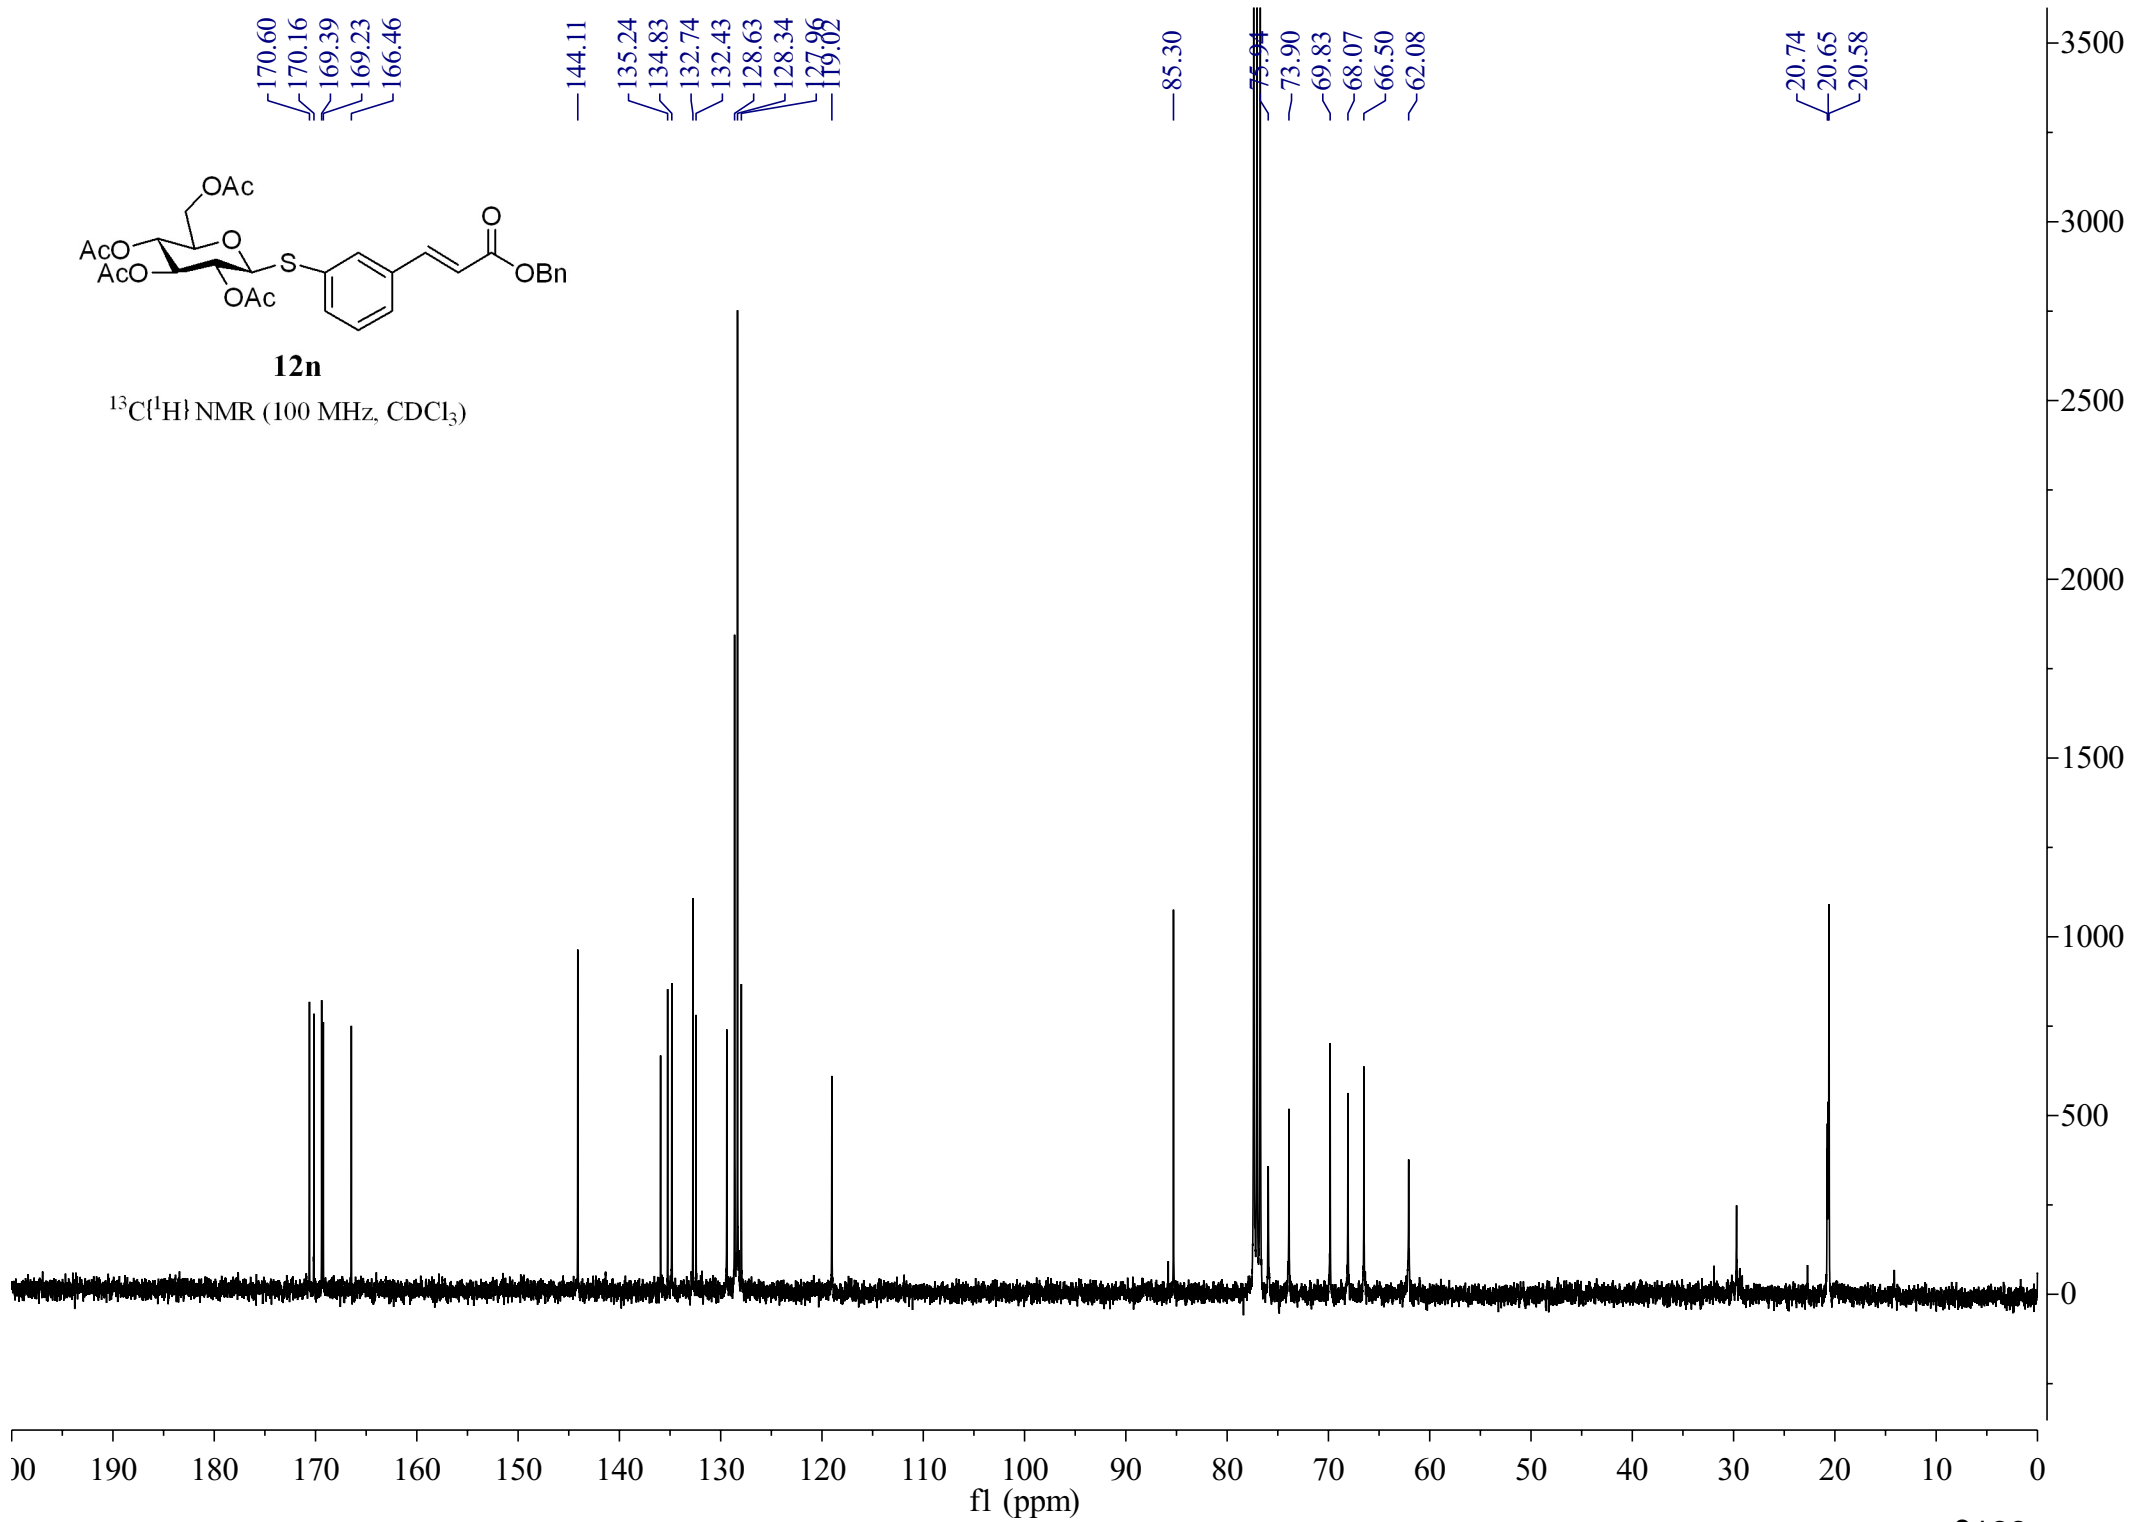

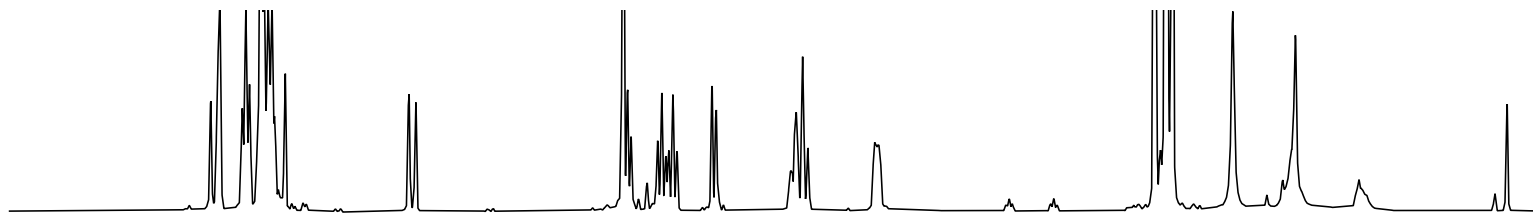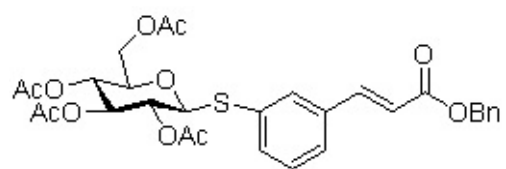

12n

<sup>1</sup>H-<sup>1</sup>H COSY (400 MHz, CDCl<sub>3</sub>)

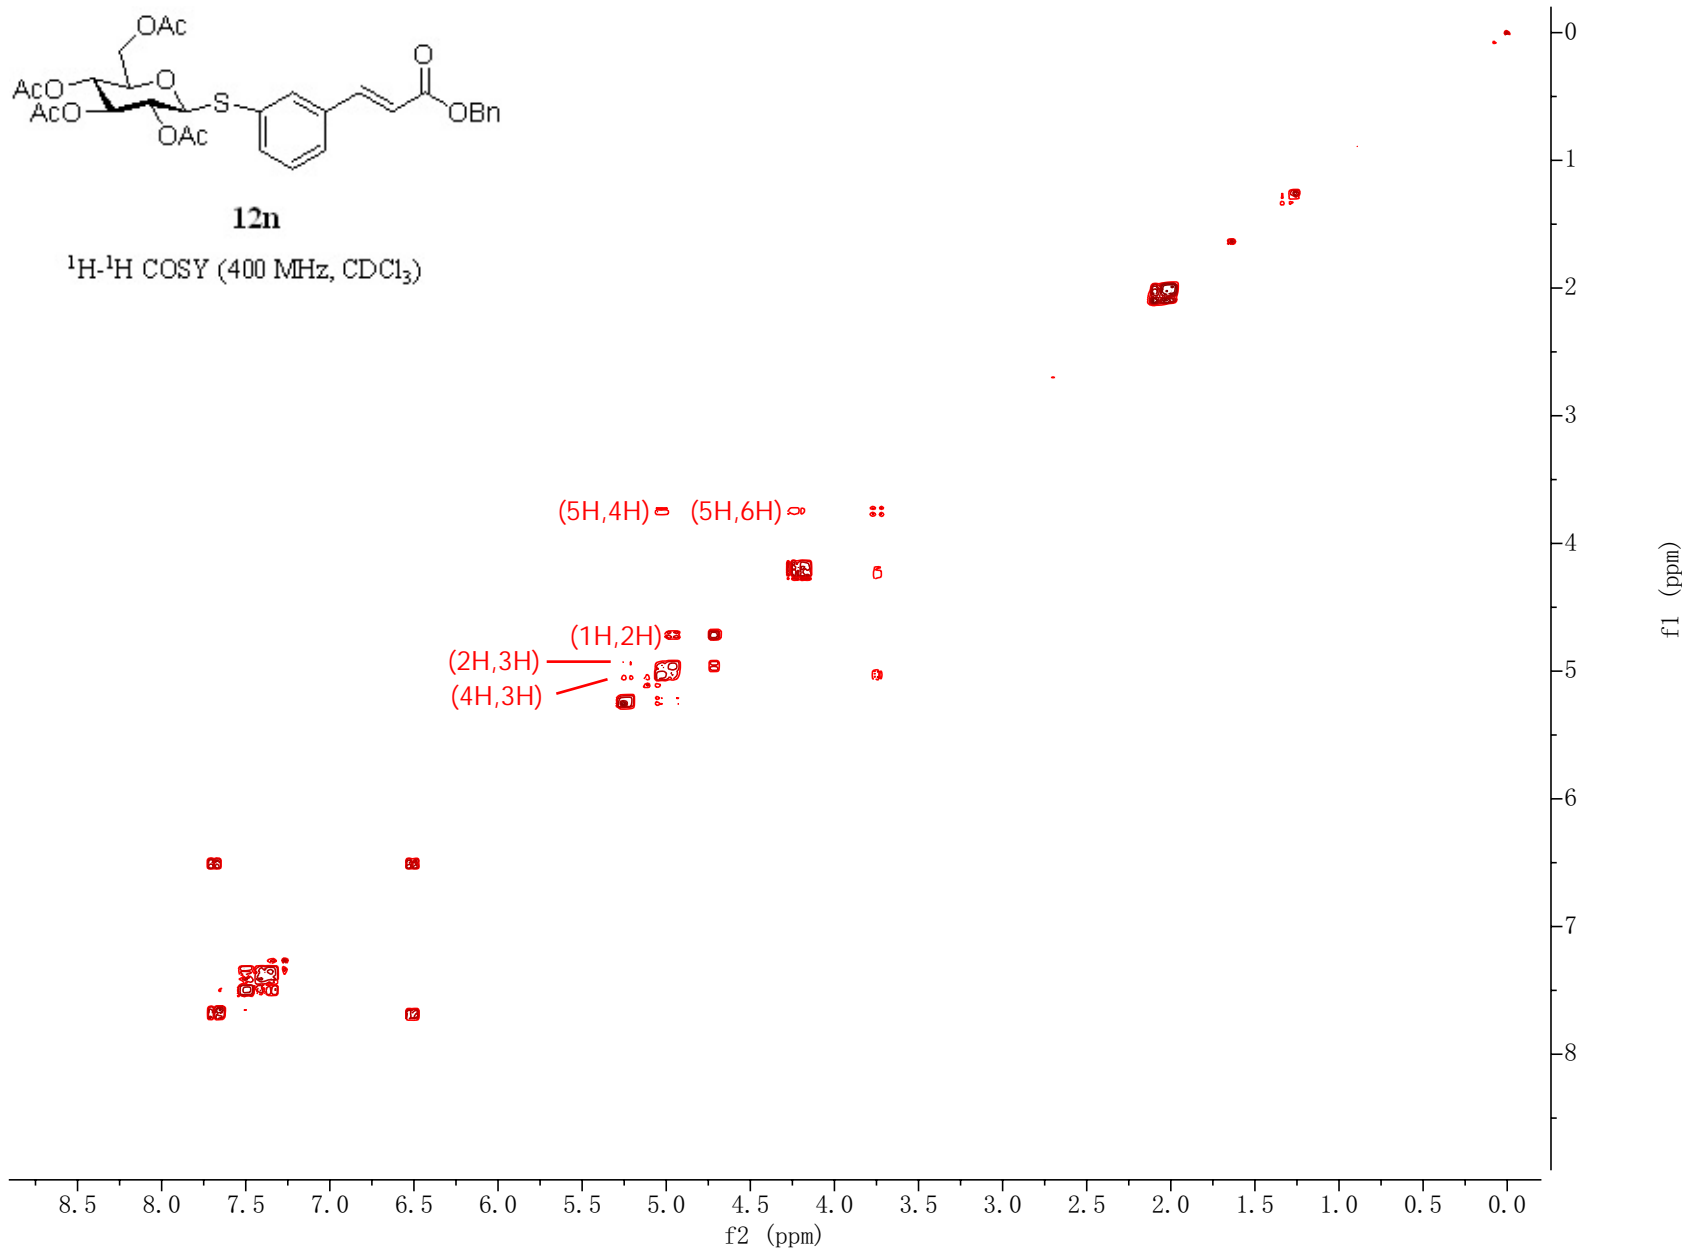

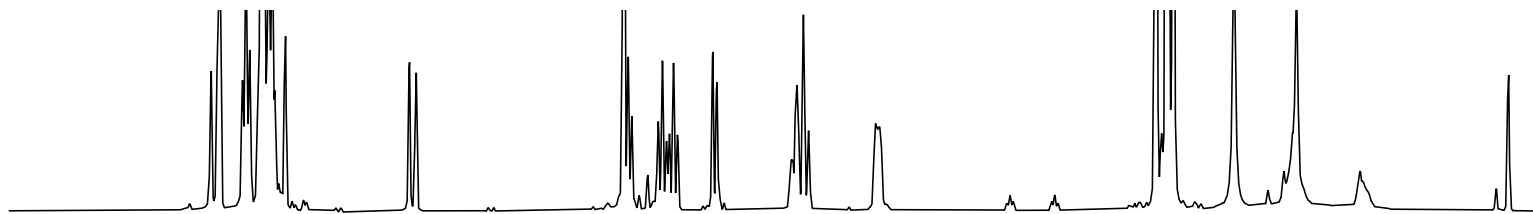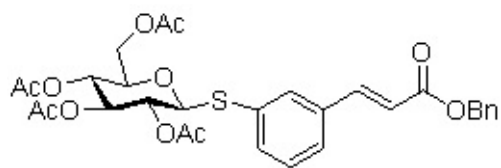

12n

HSQC (400 MHz, CDCl<sub>3</sub>)

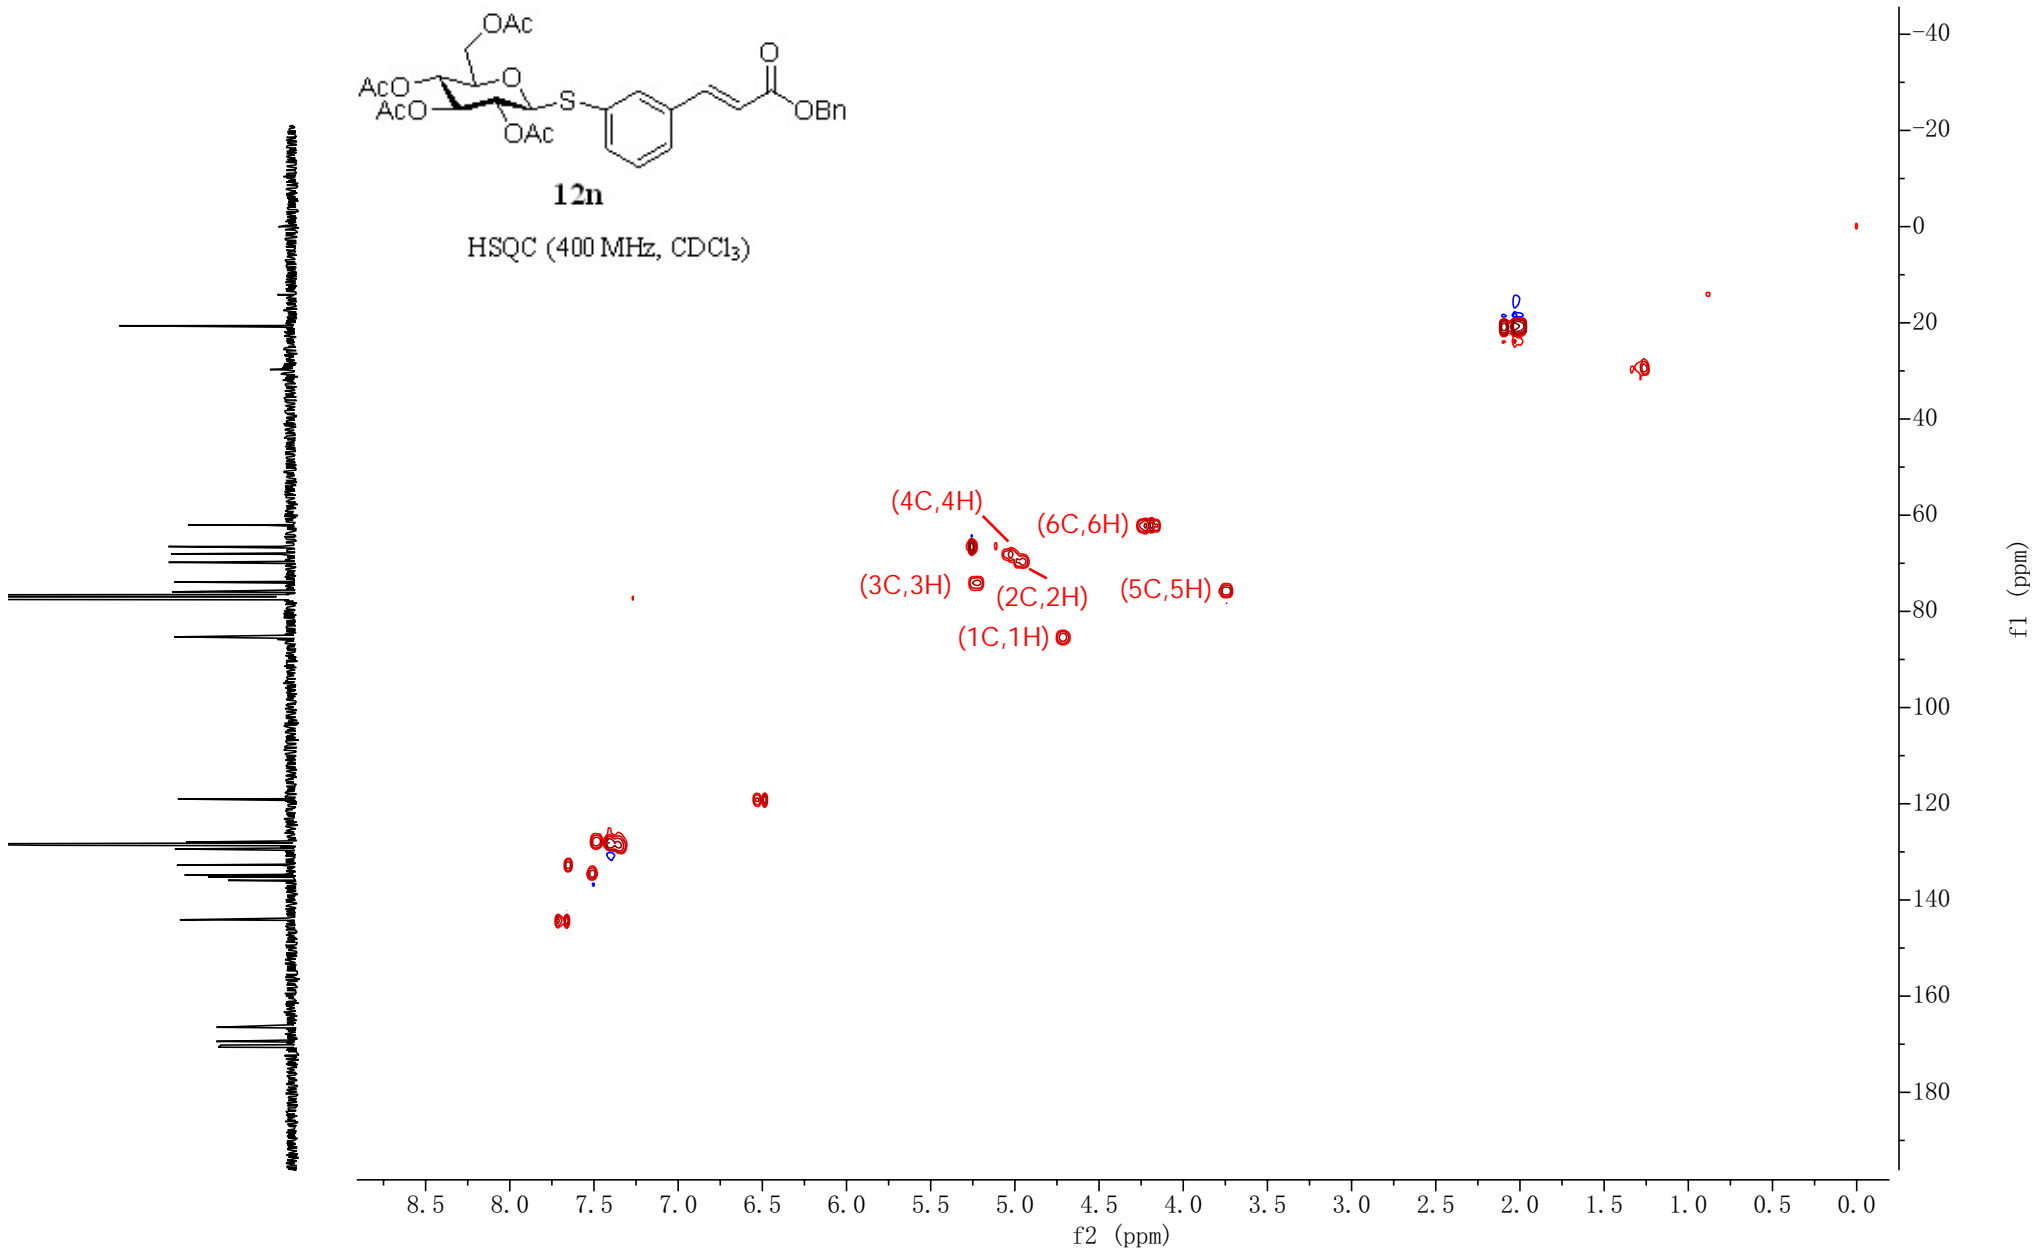

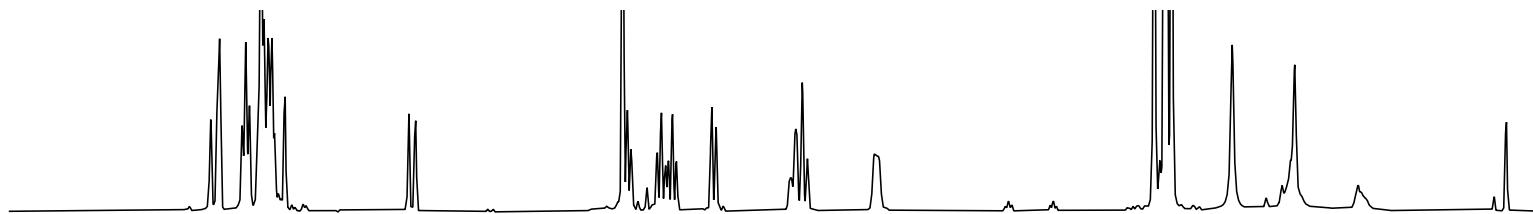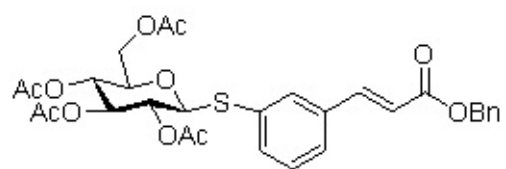

12n

HMBC (400 MHz, CDCl<sub>3</sub>)

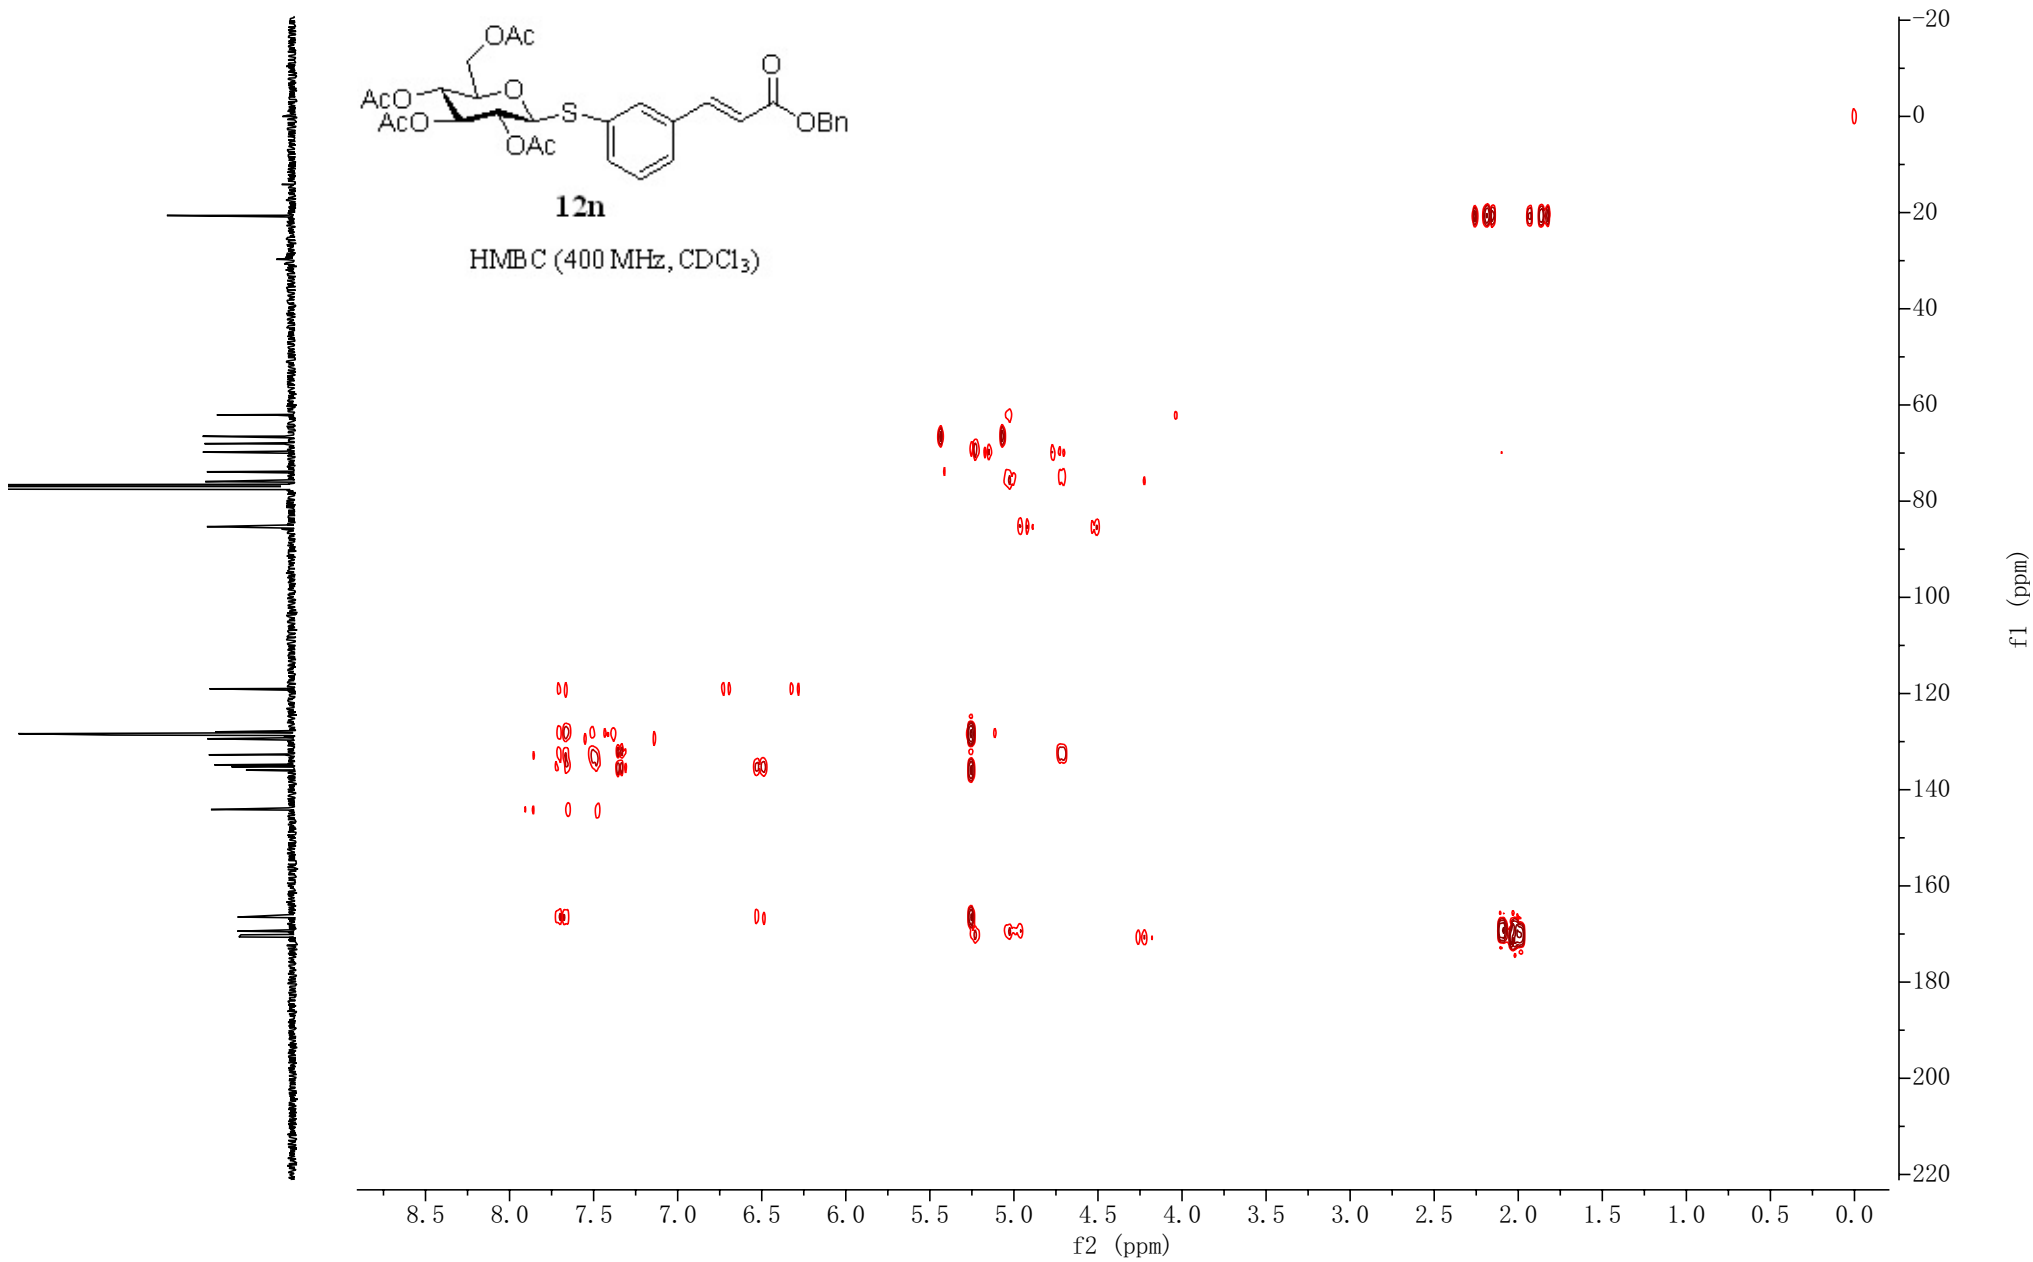

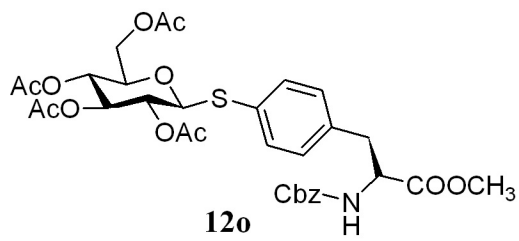

<sup>1</sup>H NMR (400 MHz, CDCl<sub>3</sub>)

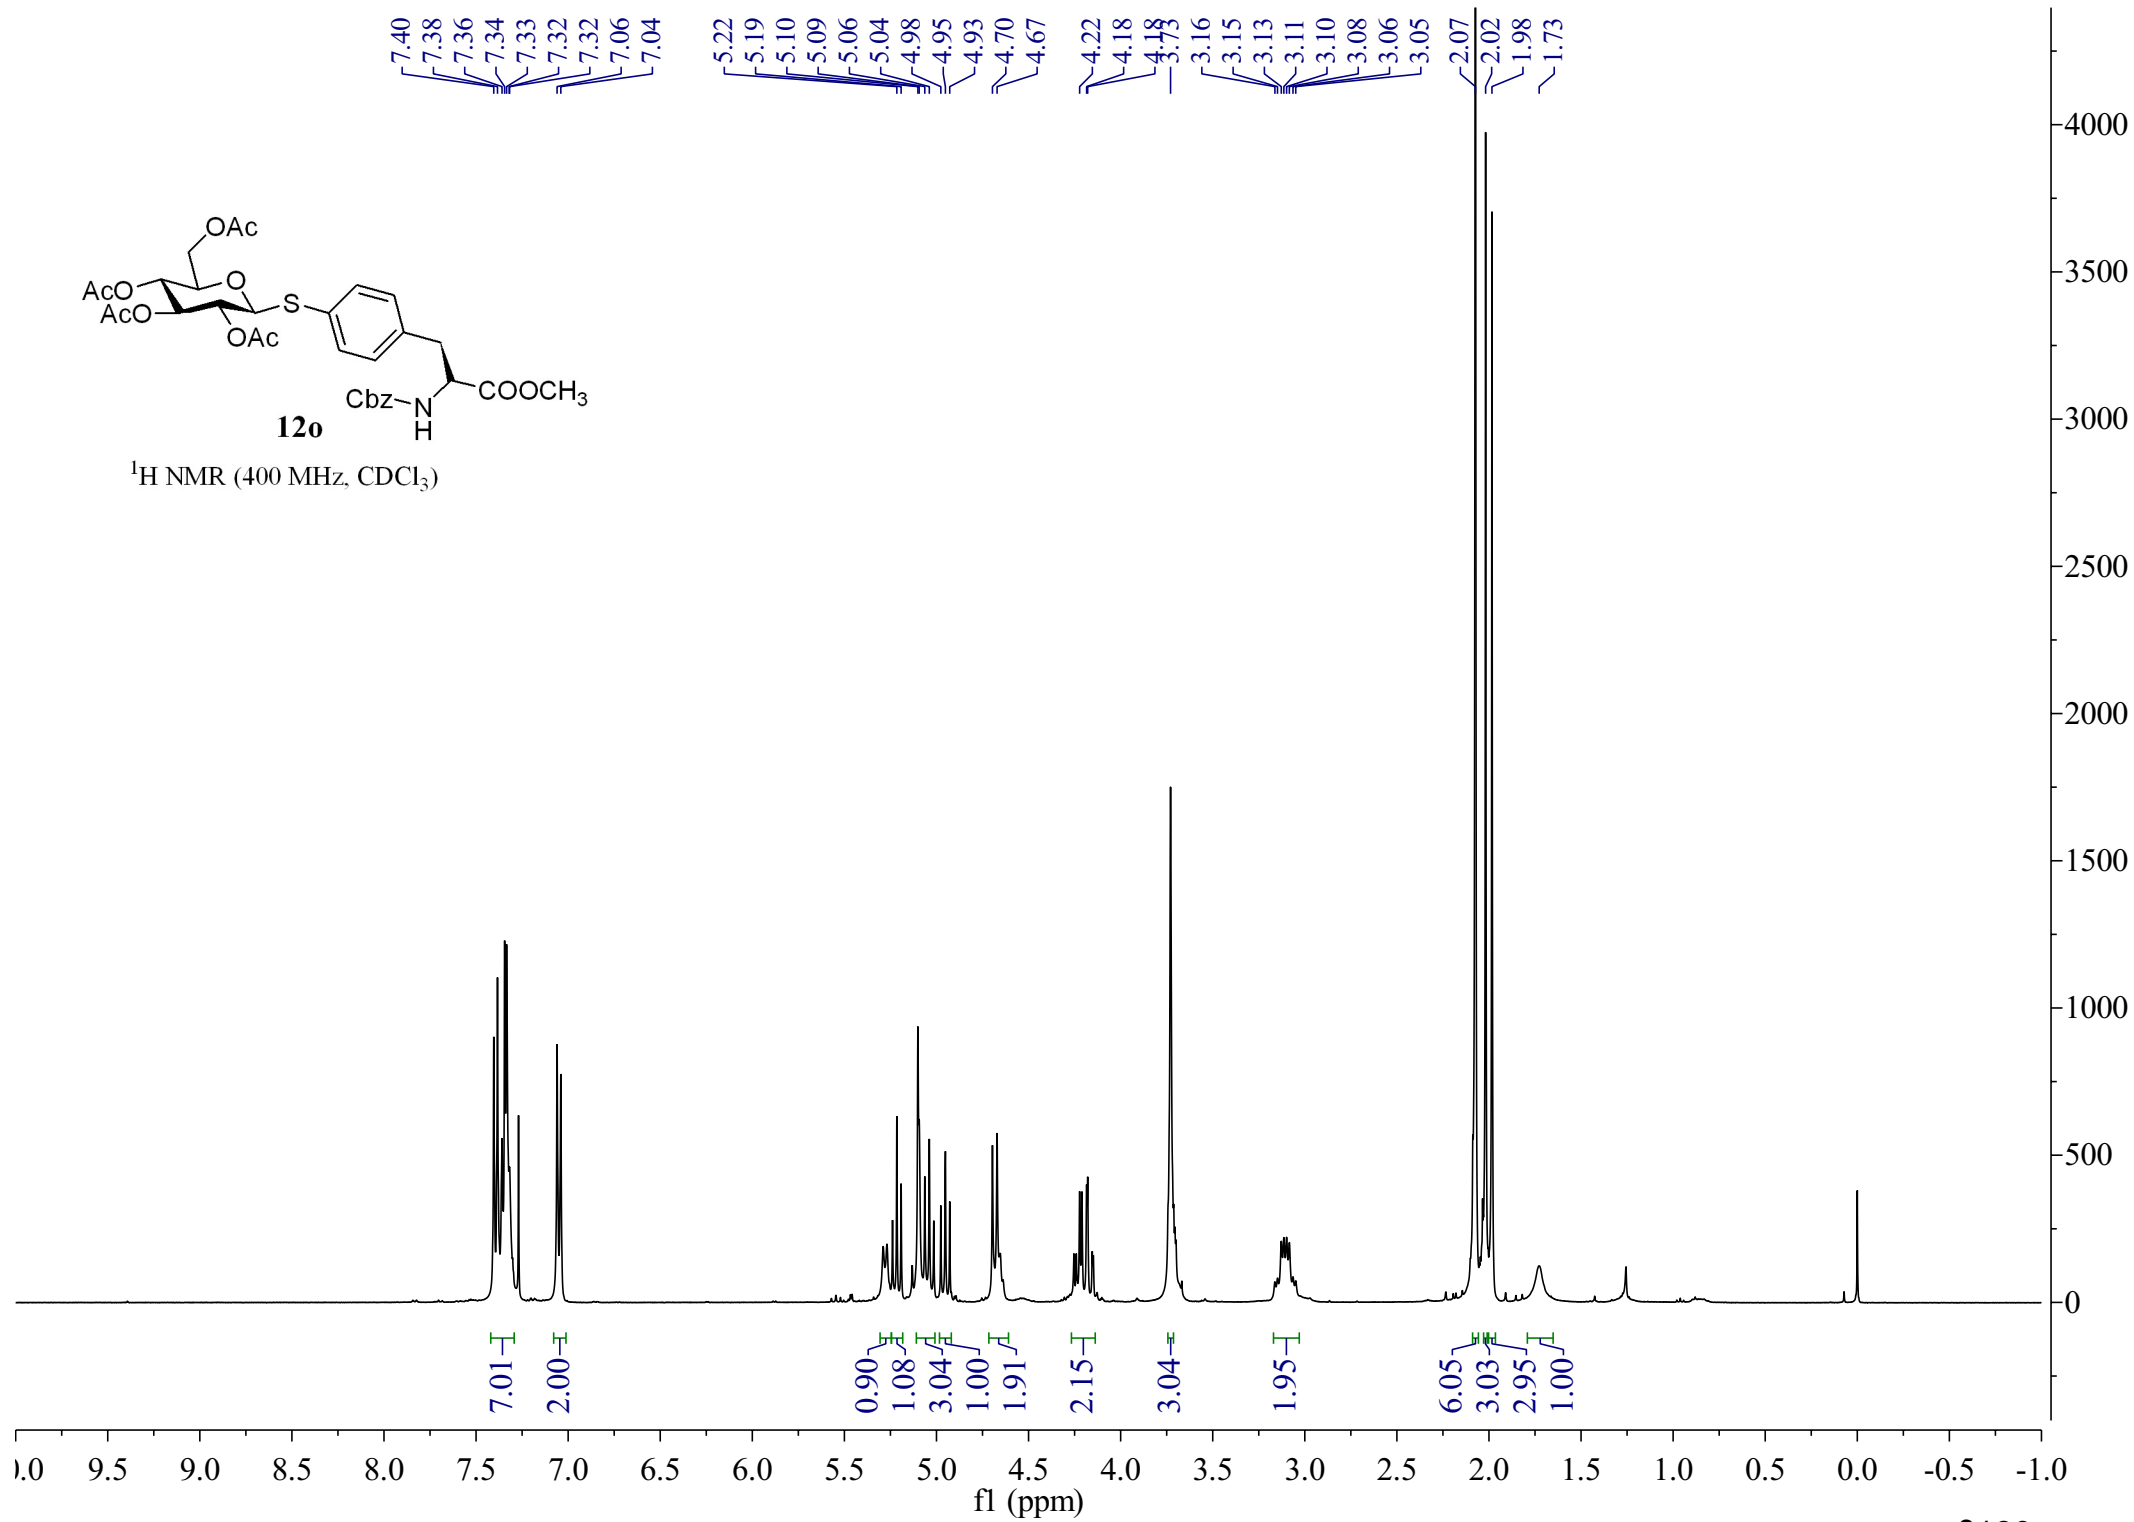

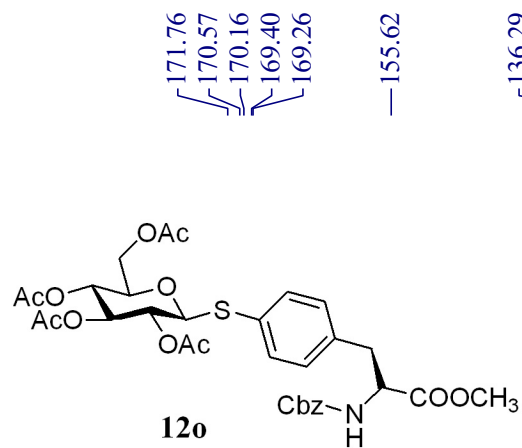

$^{13}\text{C}\{^1\text{H}\}$  NMR (100 MHz,  $\text{CDCl}_3$ )

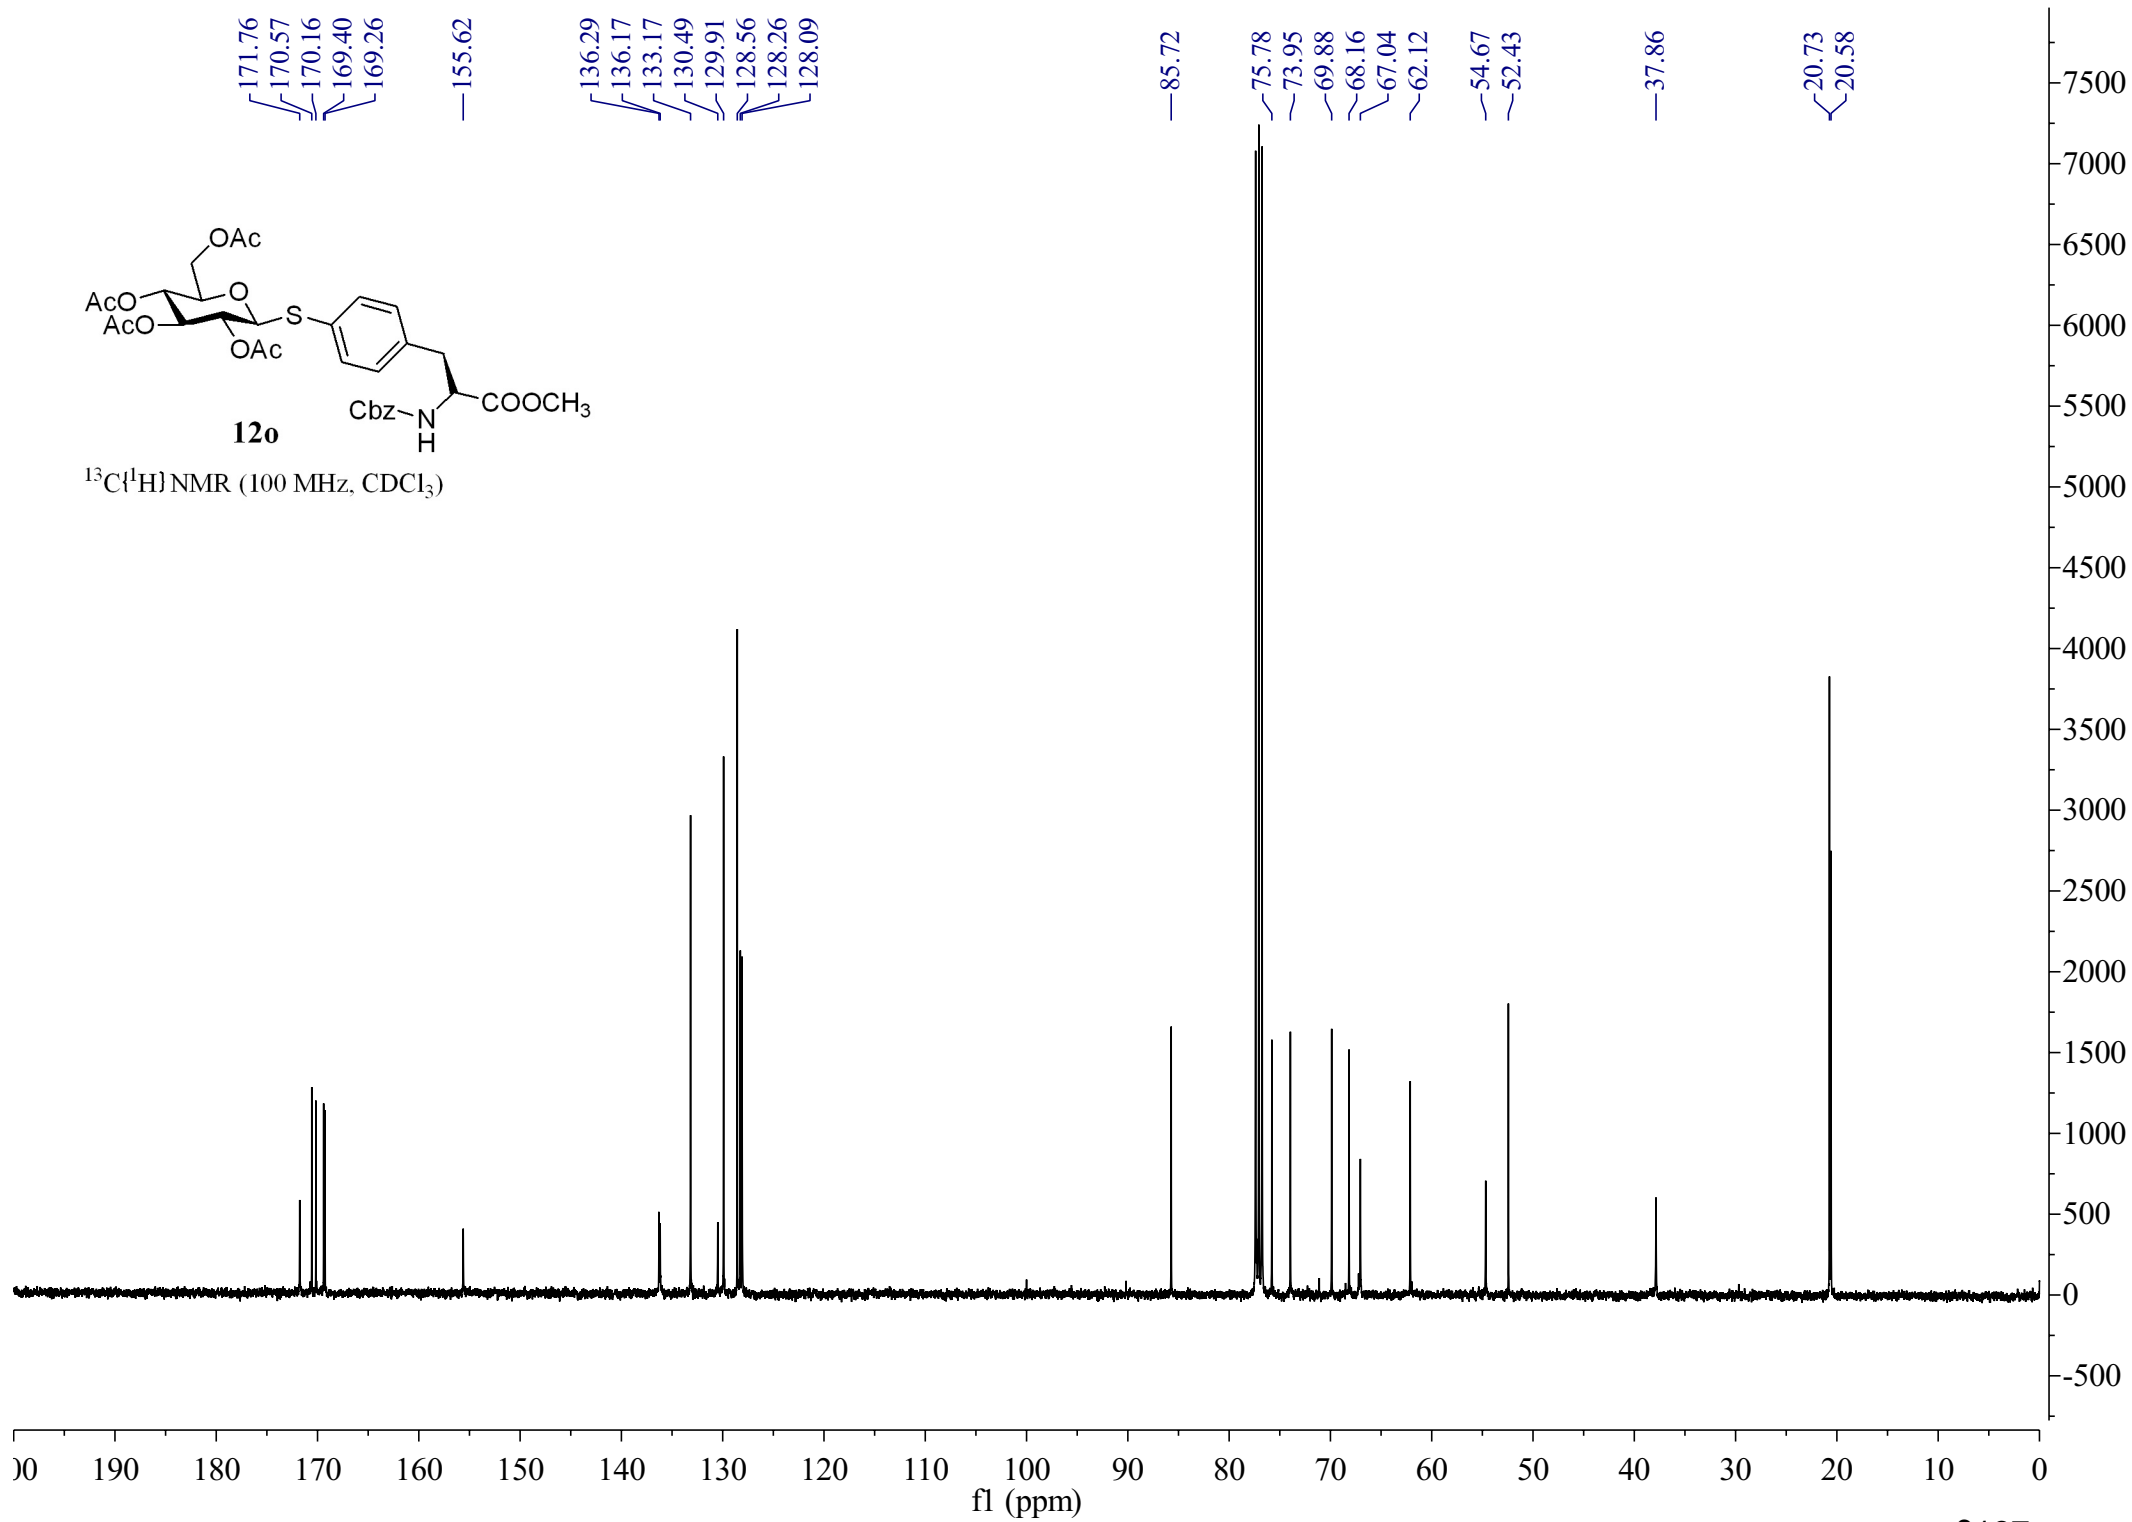

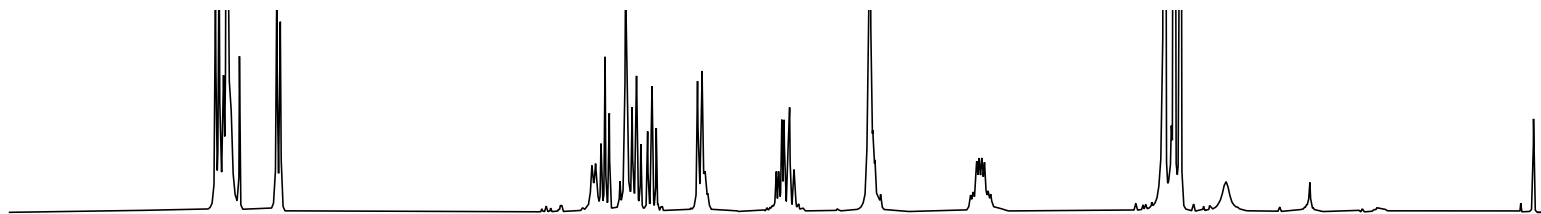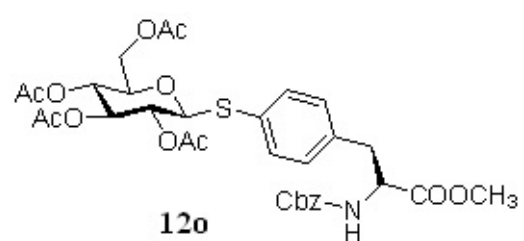

$^1\text{H}$ - $^1\text{H}$  COSY (400 MHz,  $\text{CDCl}_3$ )

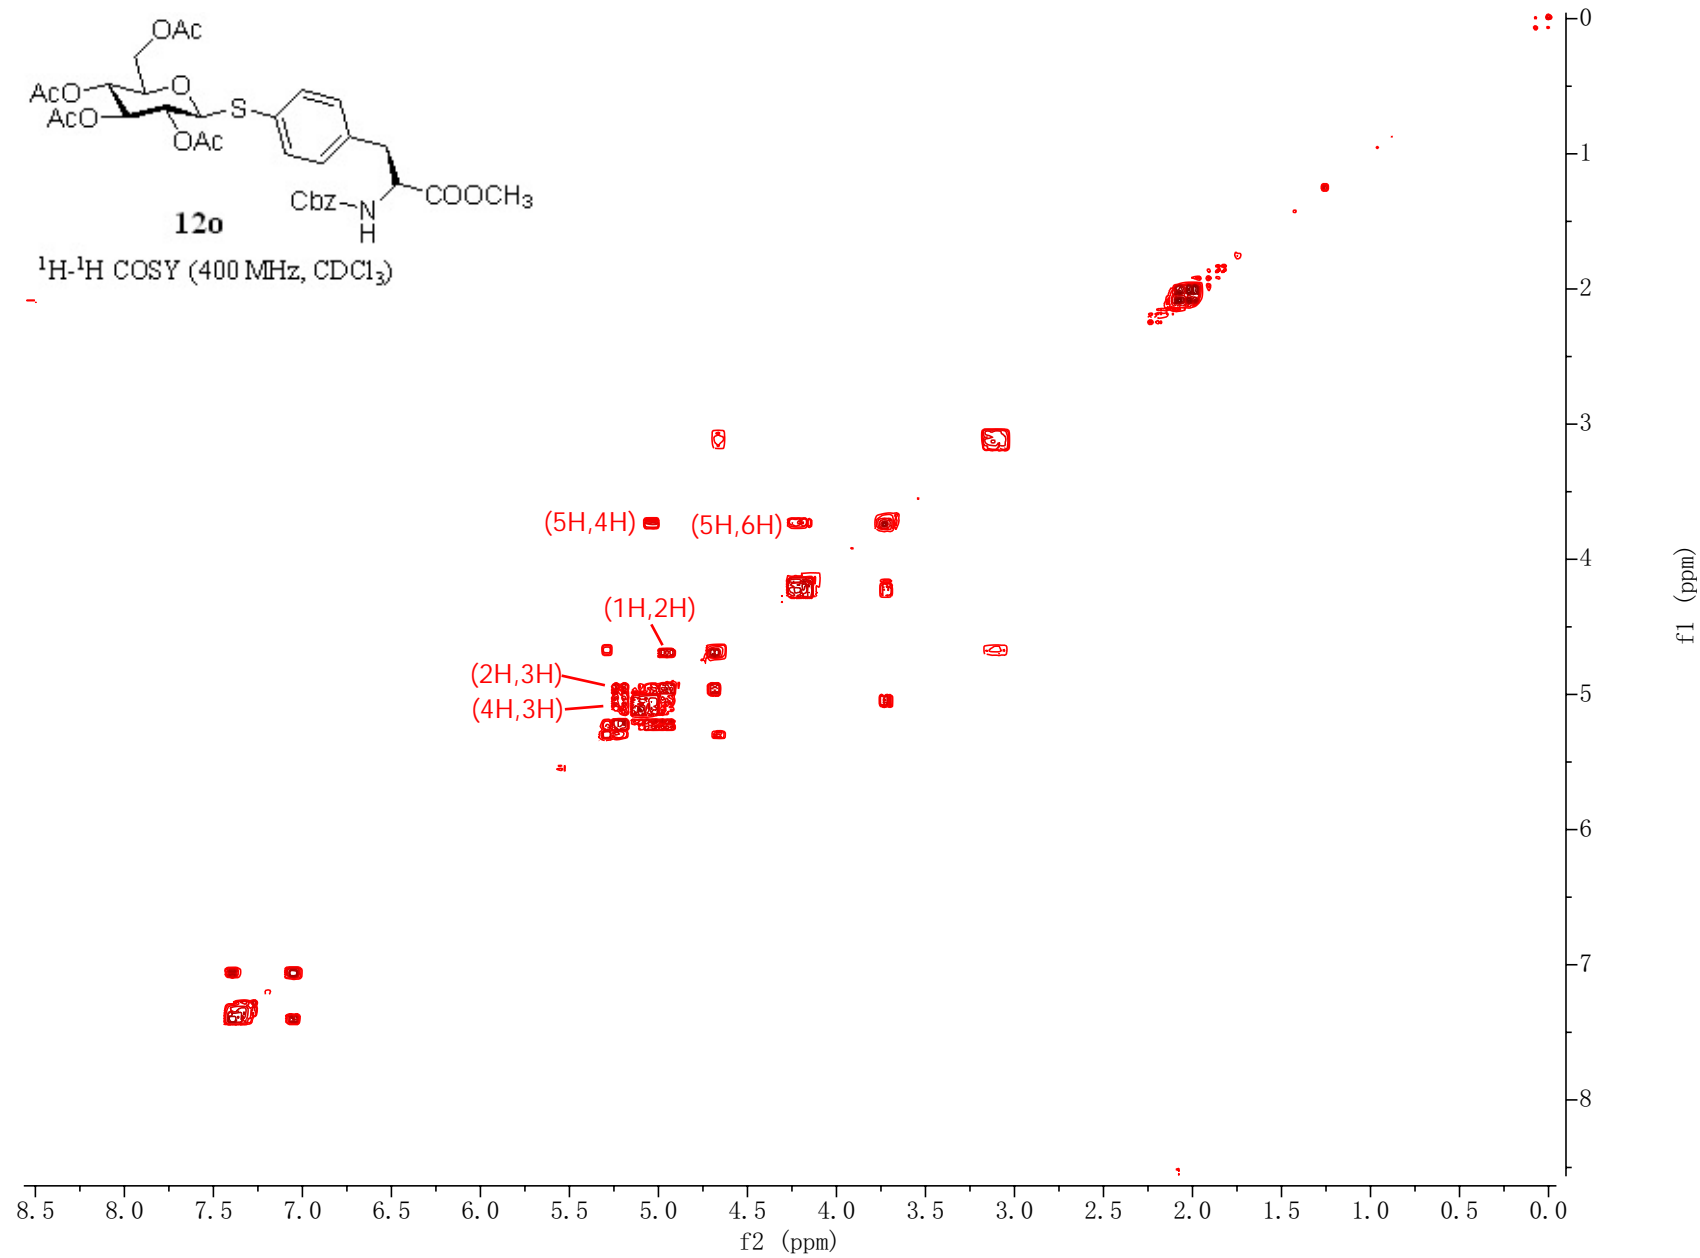



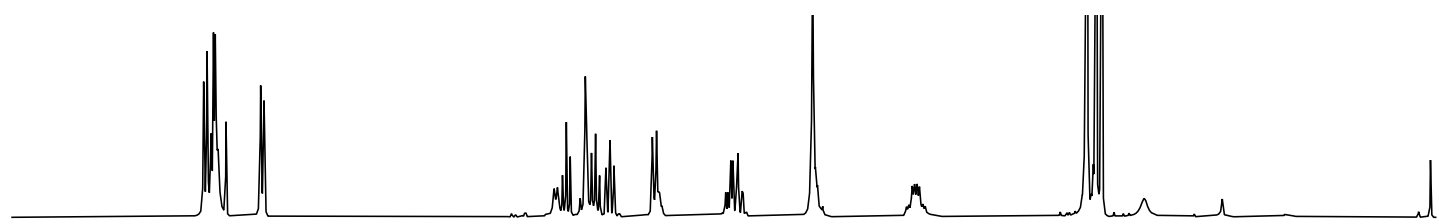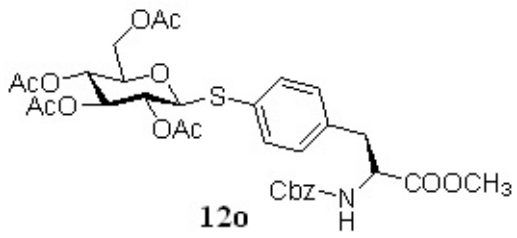

HSQC (400 MHz, CDCl<sub>3</sub>)

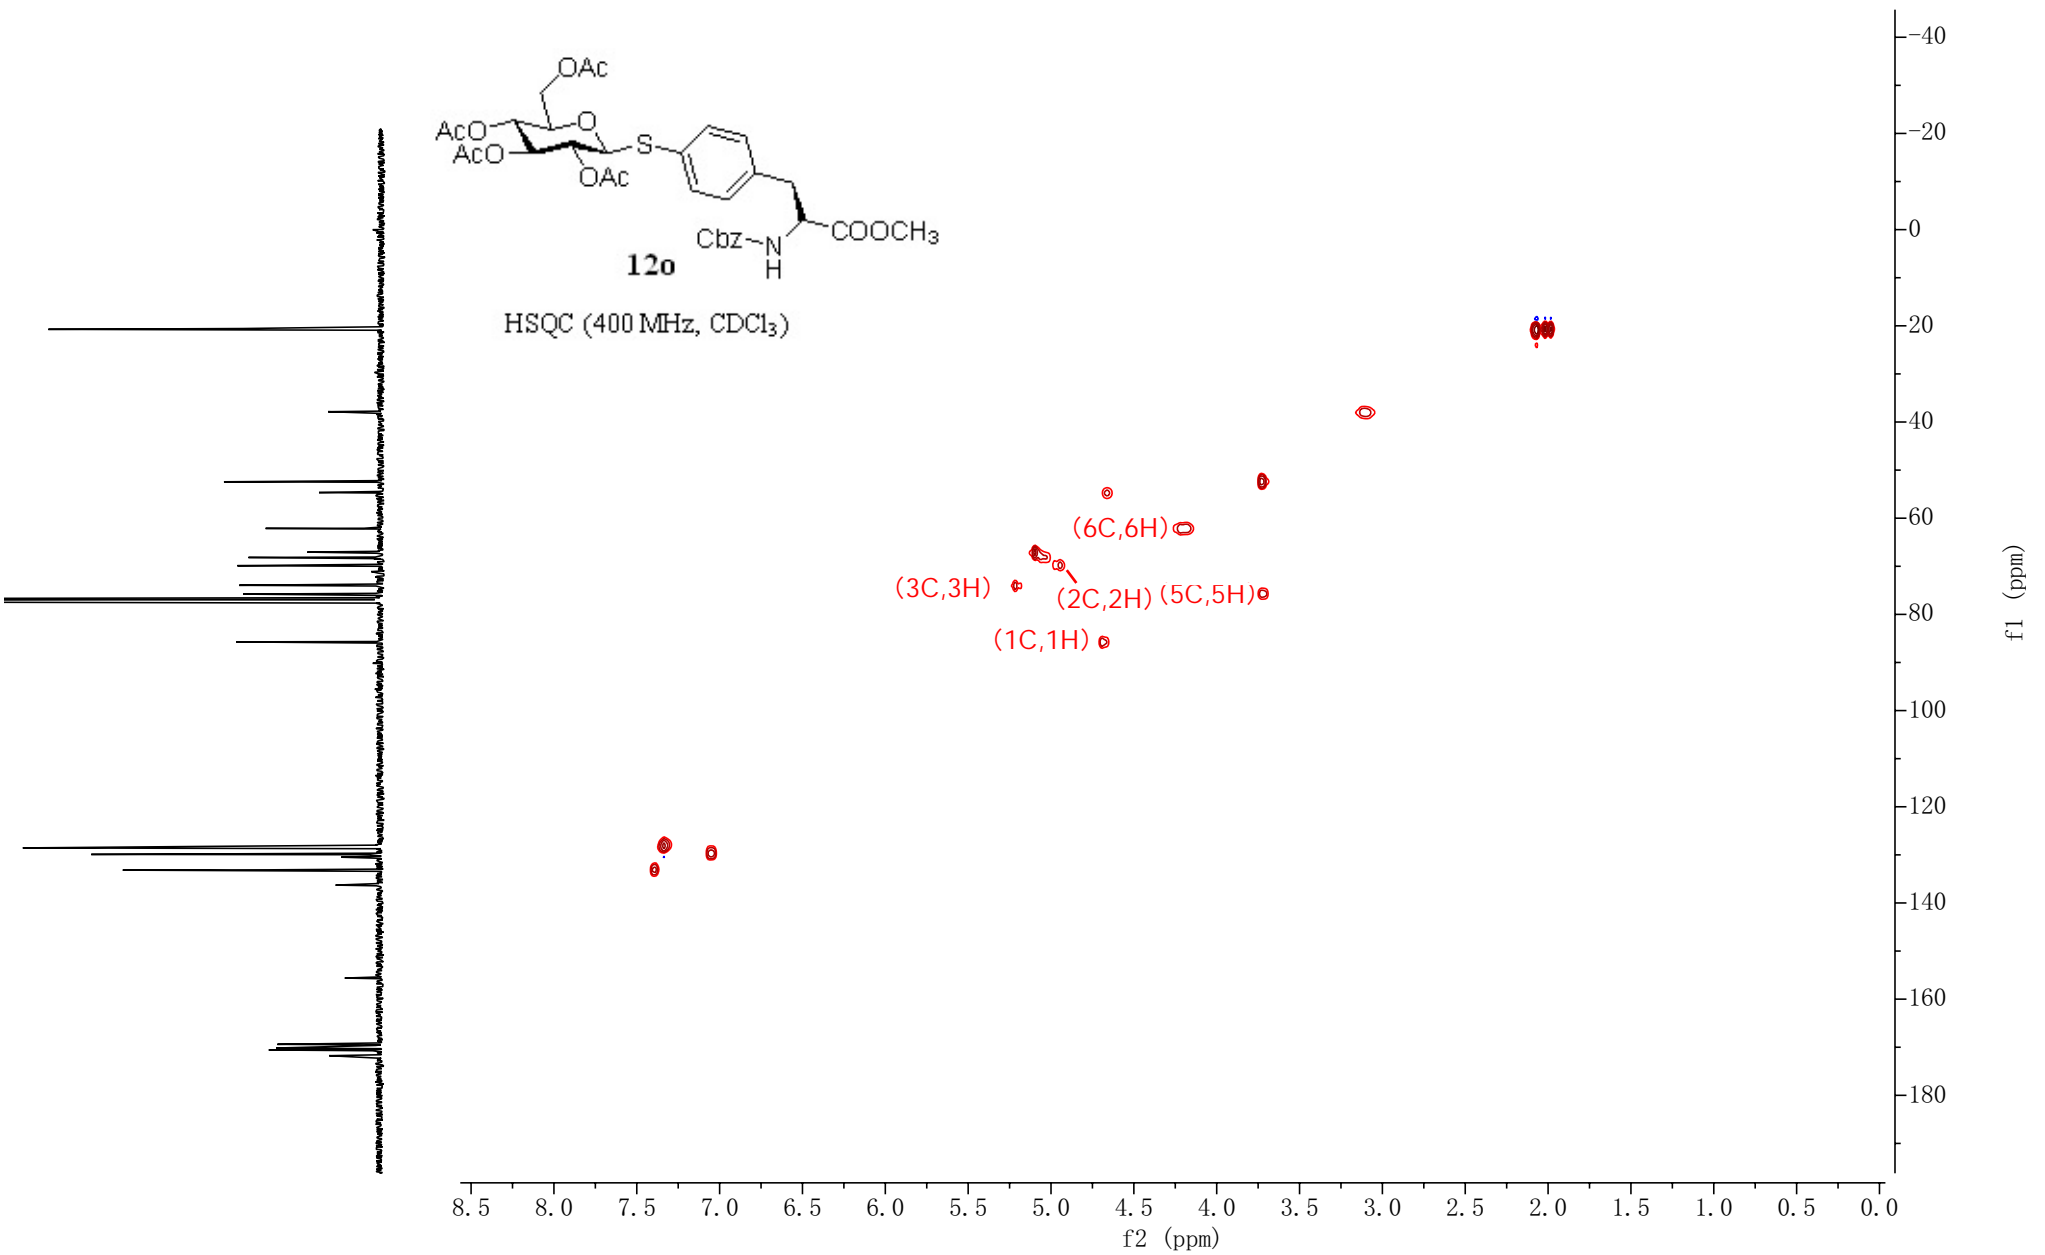

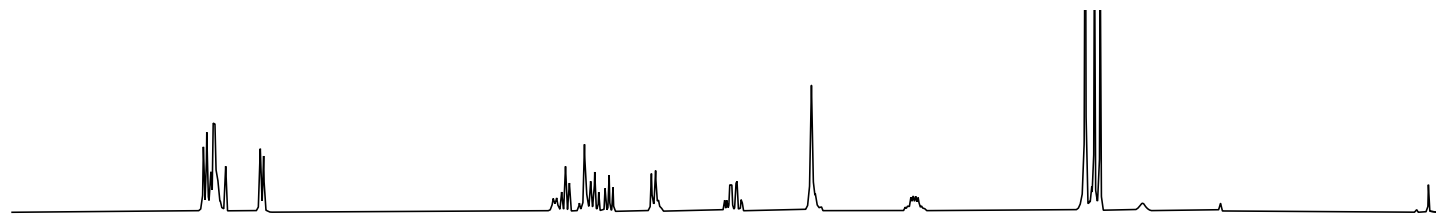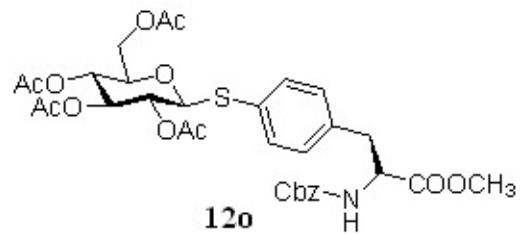

HMBC (400 MHz, CDCl<sub>3</sub>)

U

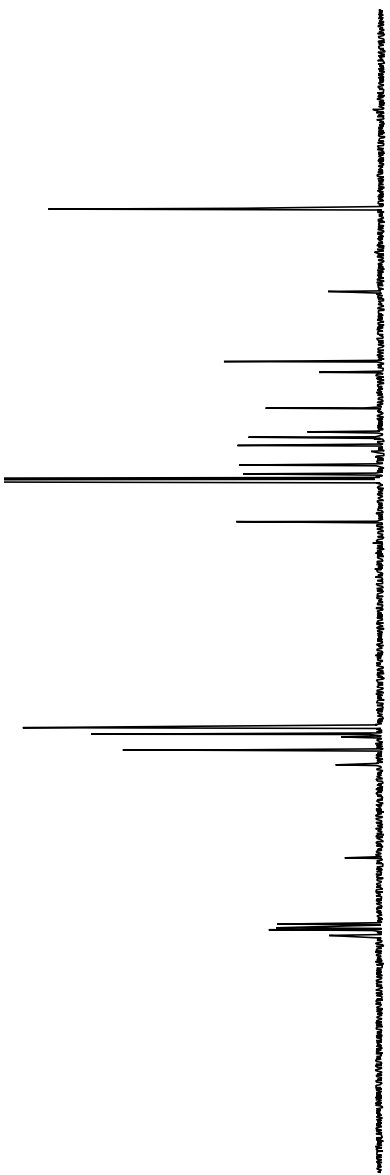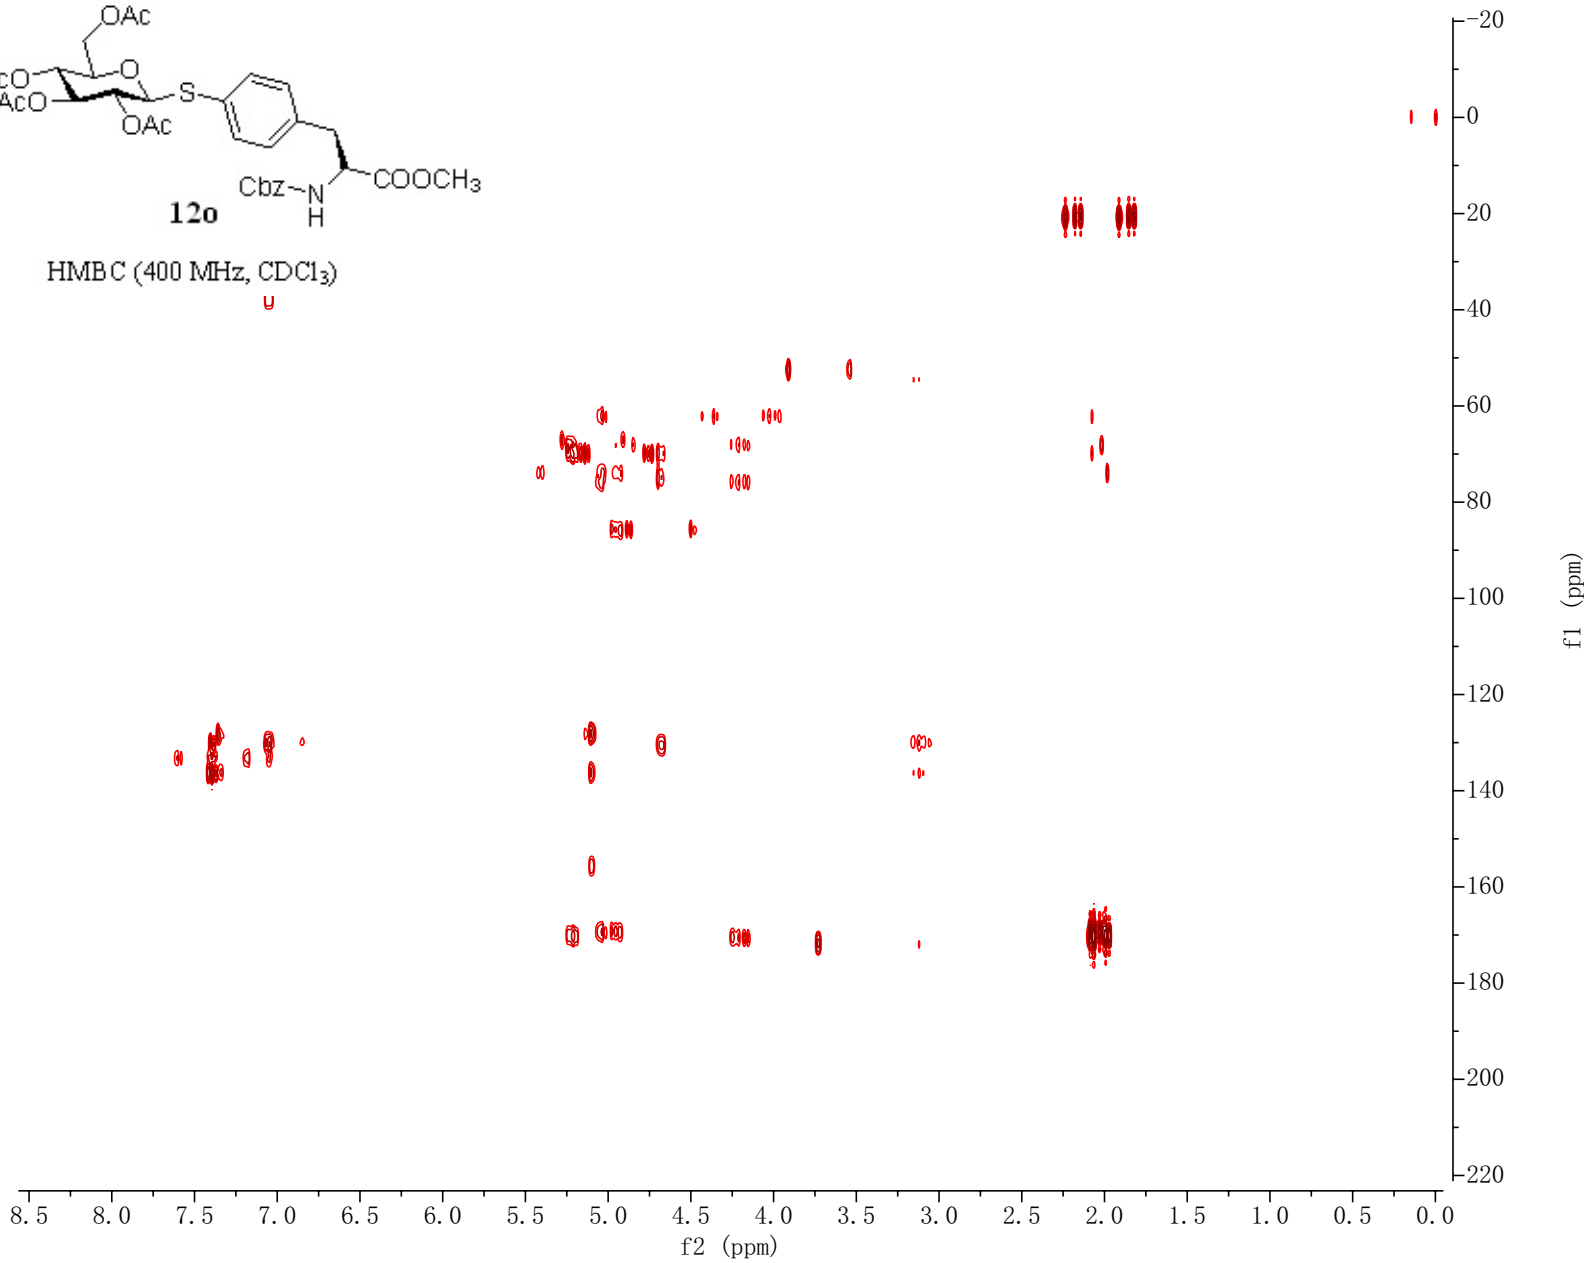

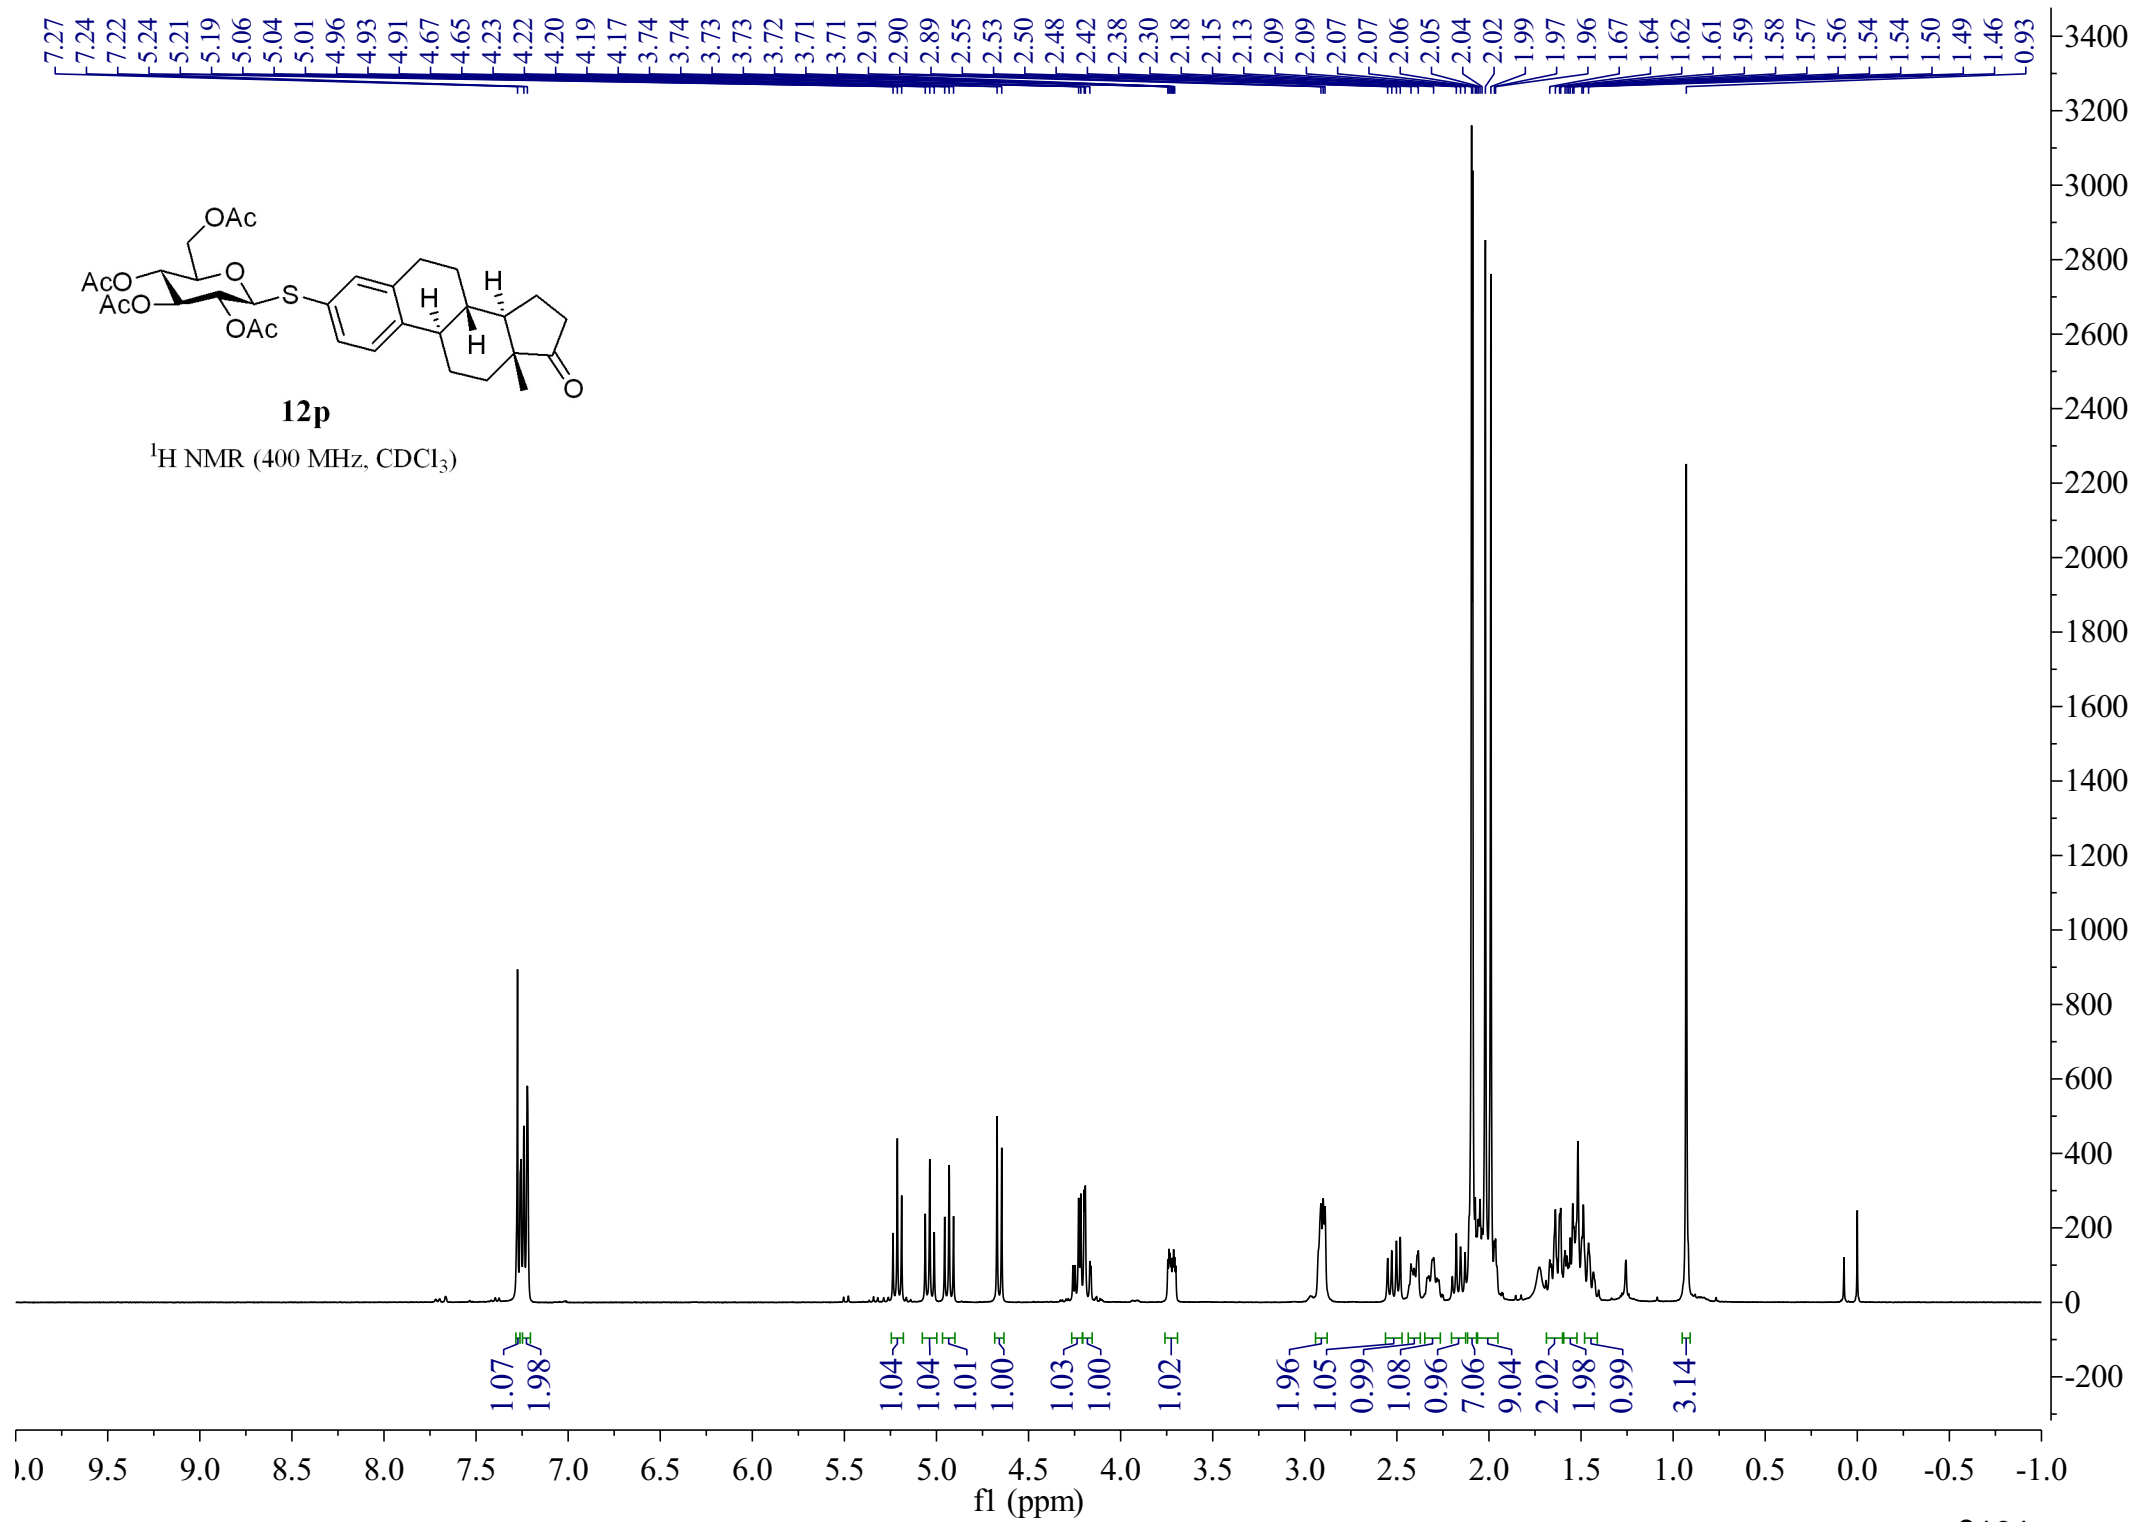

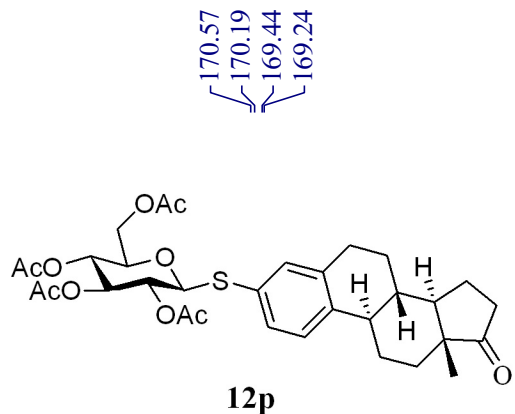

$^{13}\text{C}\{^1\text{H}\}$  NMR (100 MHz,  $\text{CDCl}_3$ )

170.57  
170.19  
169.44  
169.24

140.54  
137.38  
134.26  
131.08  
127.93  
125.96

85.71

75.73  
74.08  
69.90  
68.15  
62.14

50.49  
47.93  
44.29

37.91  
31.55  
29.25  
26.33  
21.58  
20.80  
20.77  
20.60  
19.86  
13.83

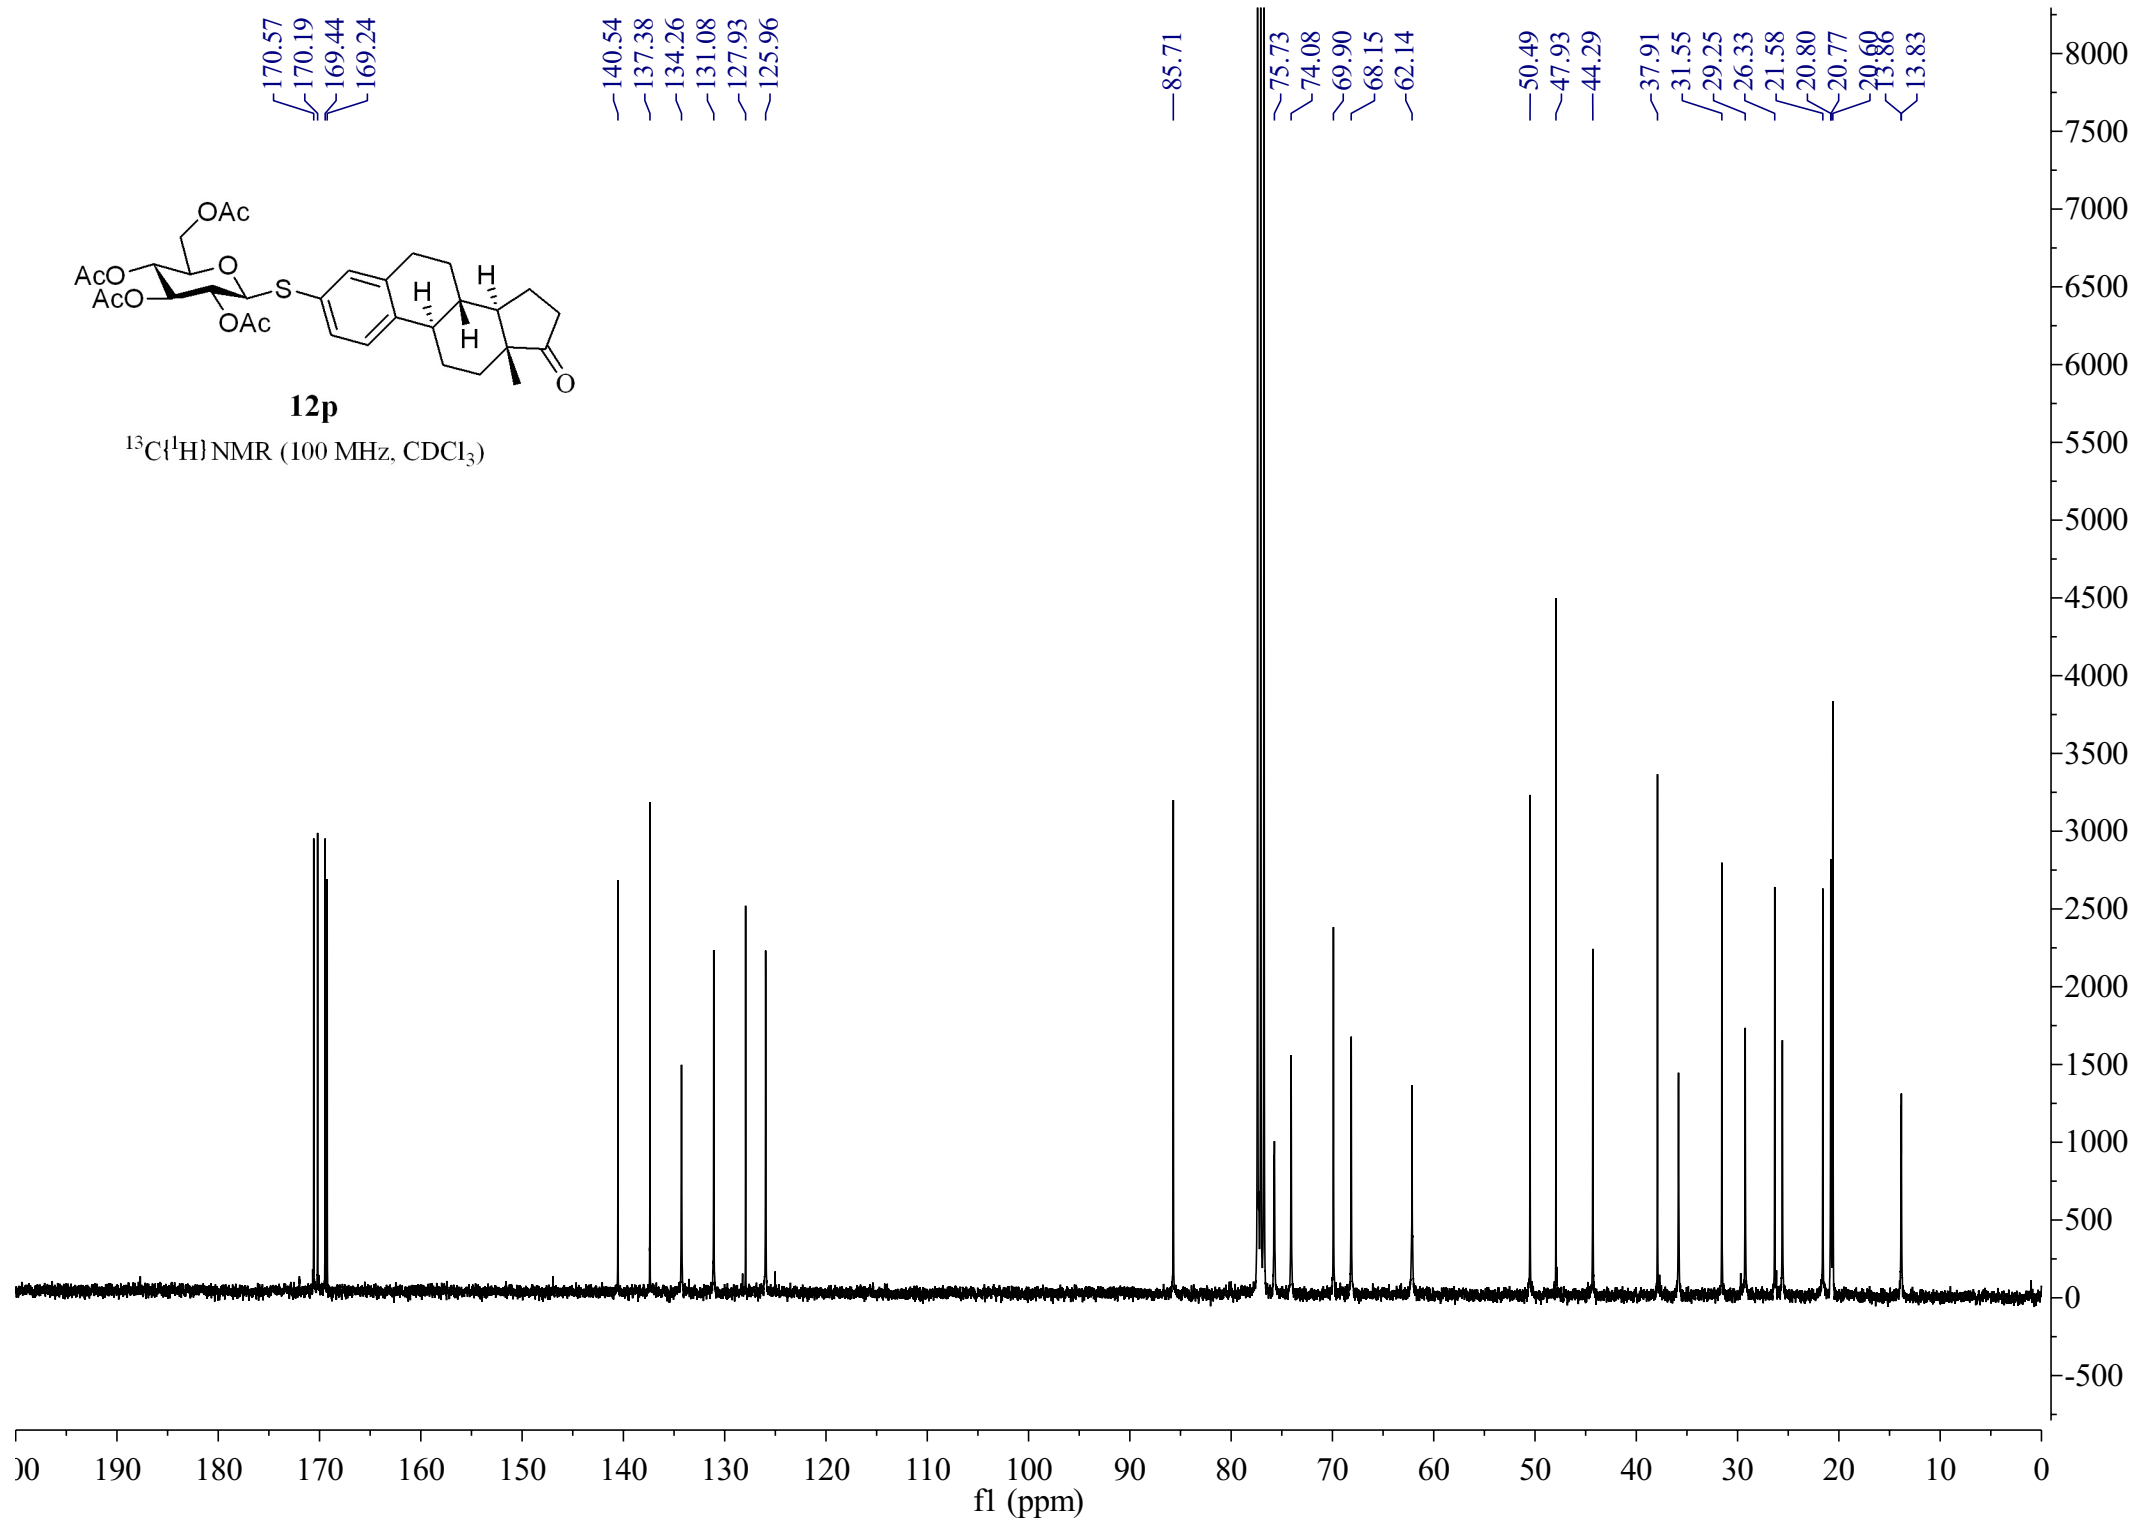

8.07  
8.05  
8.05  
7.97  
7.95  
7.95  
7.93  
7.91  
7.91  
7.81  
7.79  
7.57  
7.55  
7.46  
7.39  
7.36  
7.30  
7.28  
7.26

5.97  
5.94  
5.66  
5.63  
5.56  
5.54  
5.51  
5.14  
5.12  
4.75  
4.74  
4.72  
4.71  
4.53  
4.52  
4.50  
4.49  
4.29  
4.29  
4.28  
4.27  
4.26  
4.25

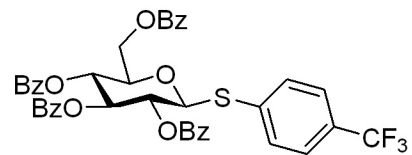

**13a**

<sup>1</sup>H NMR (400 MHz, CDCl<sub>3</sub>)

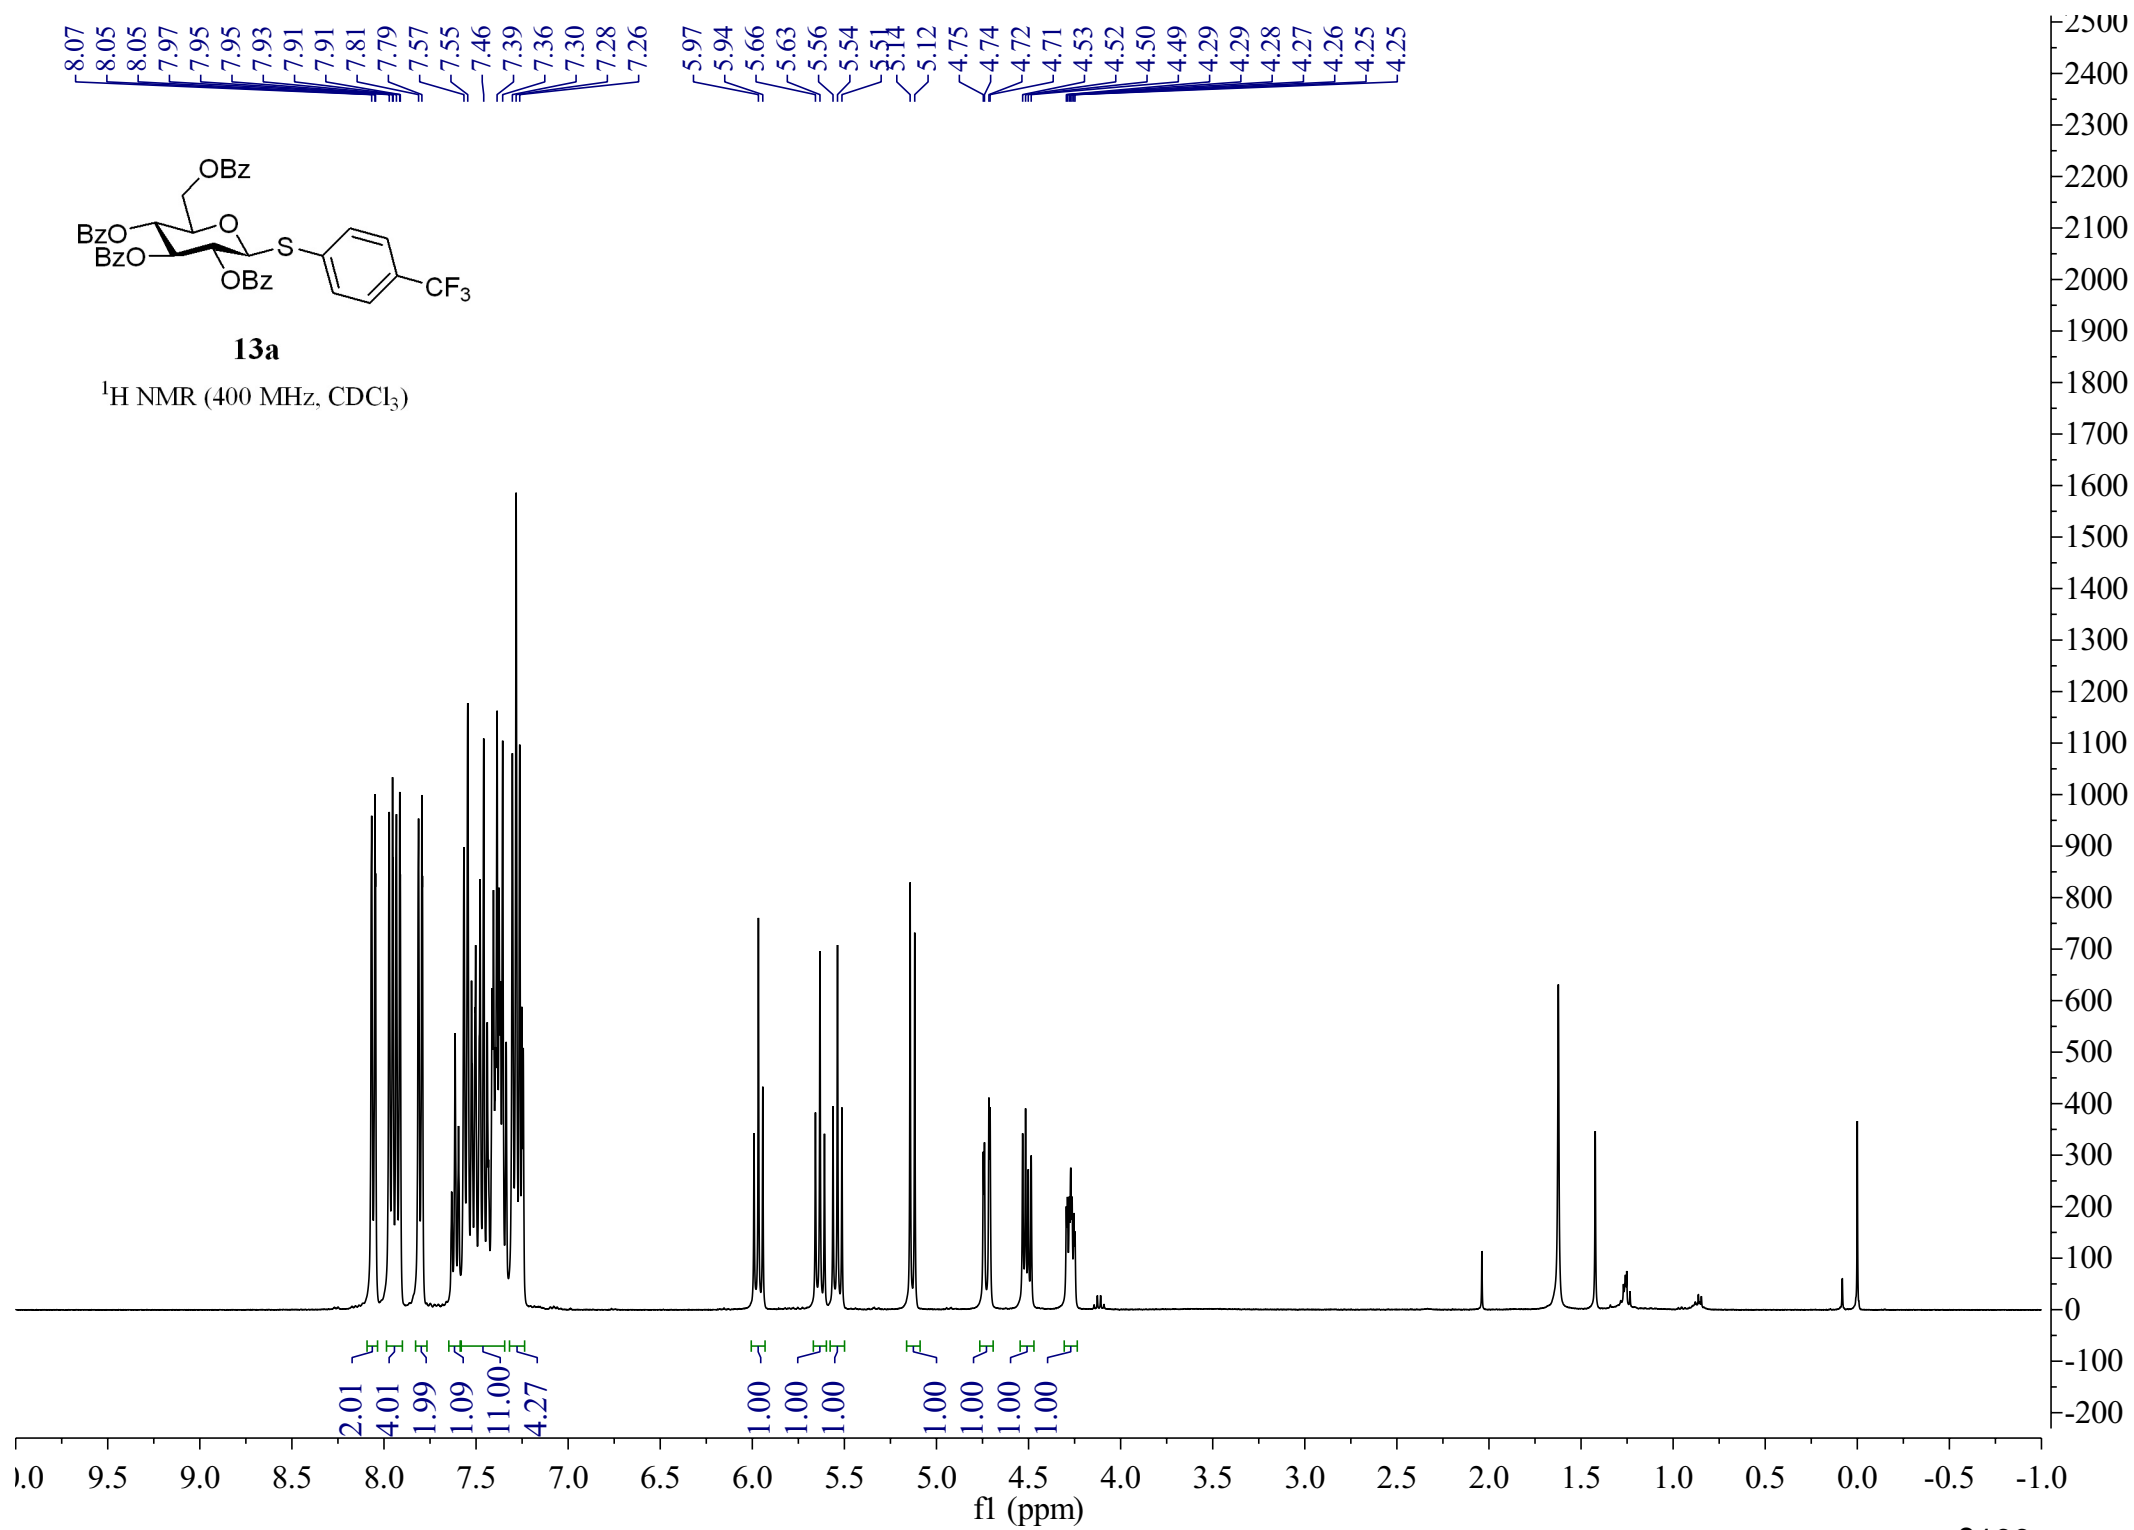

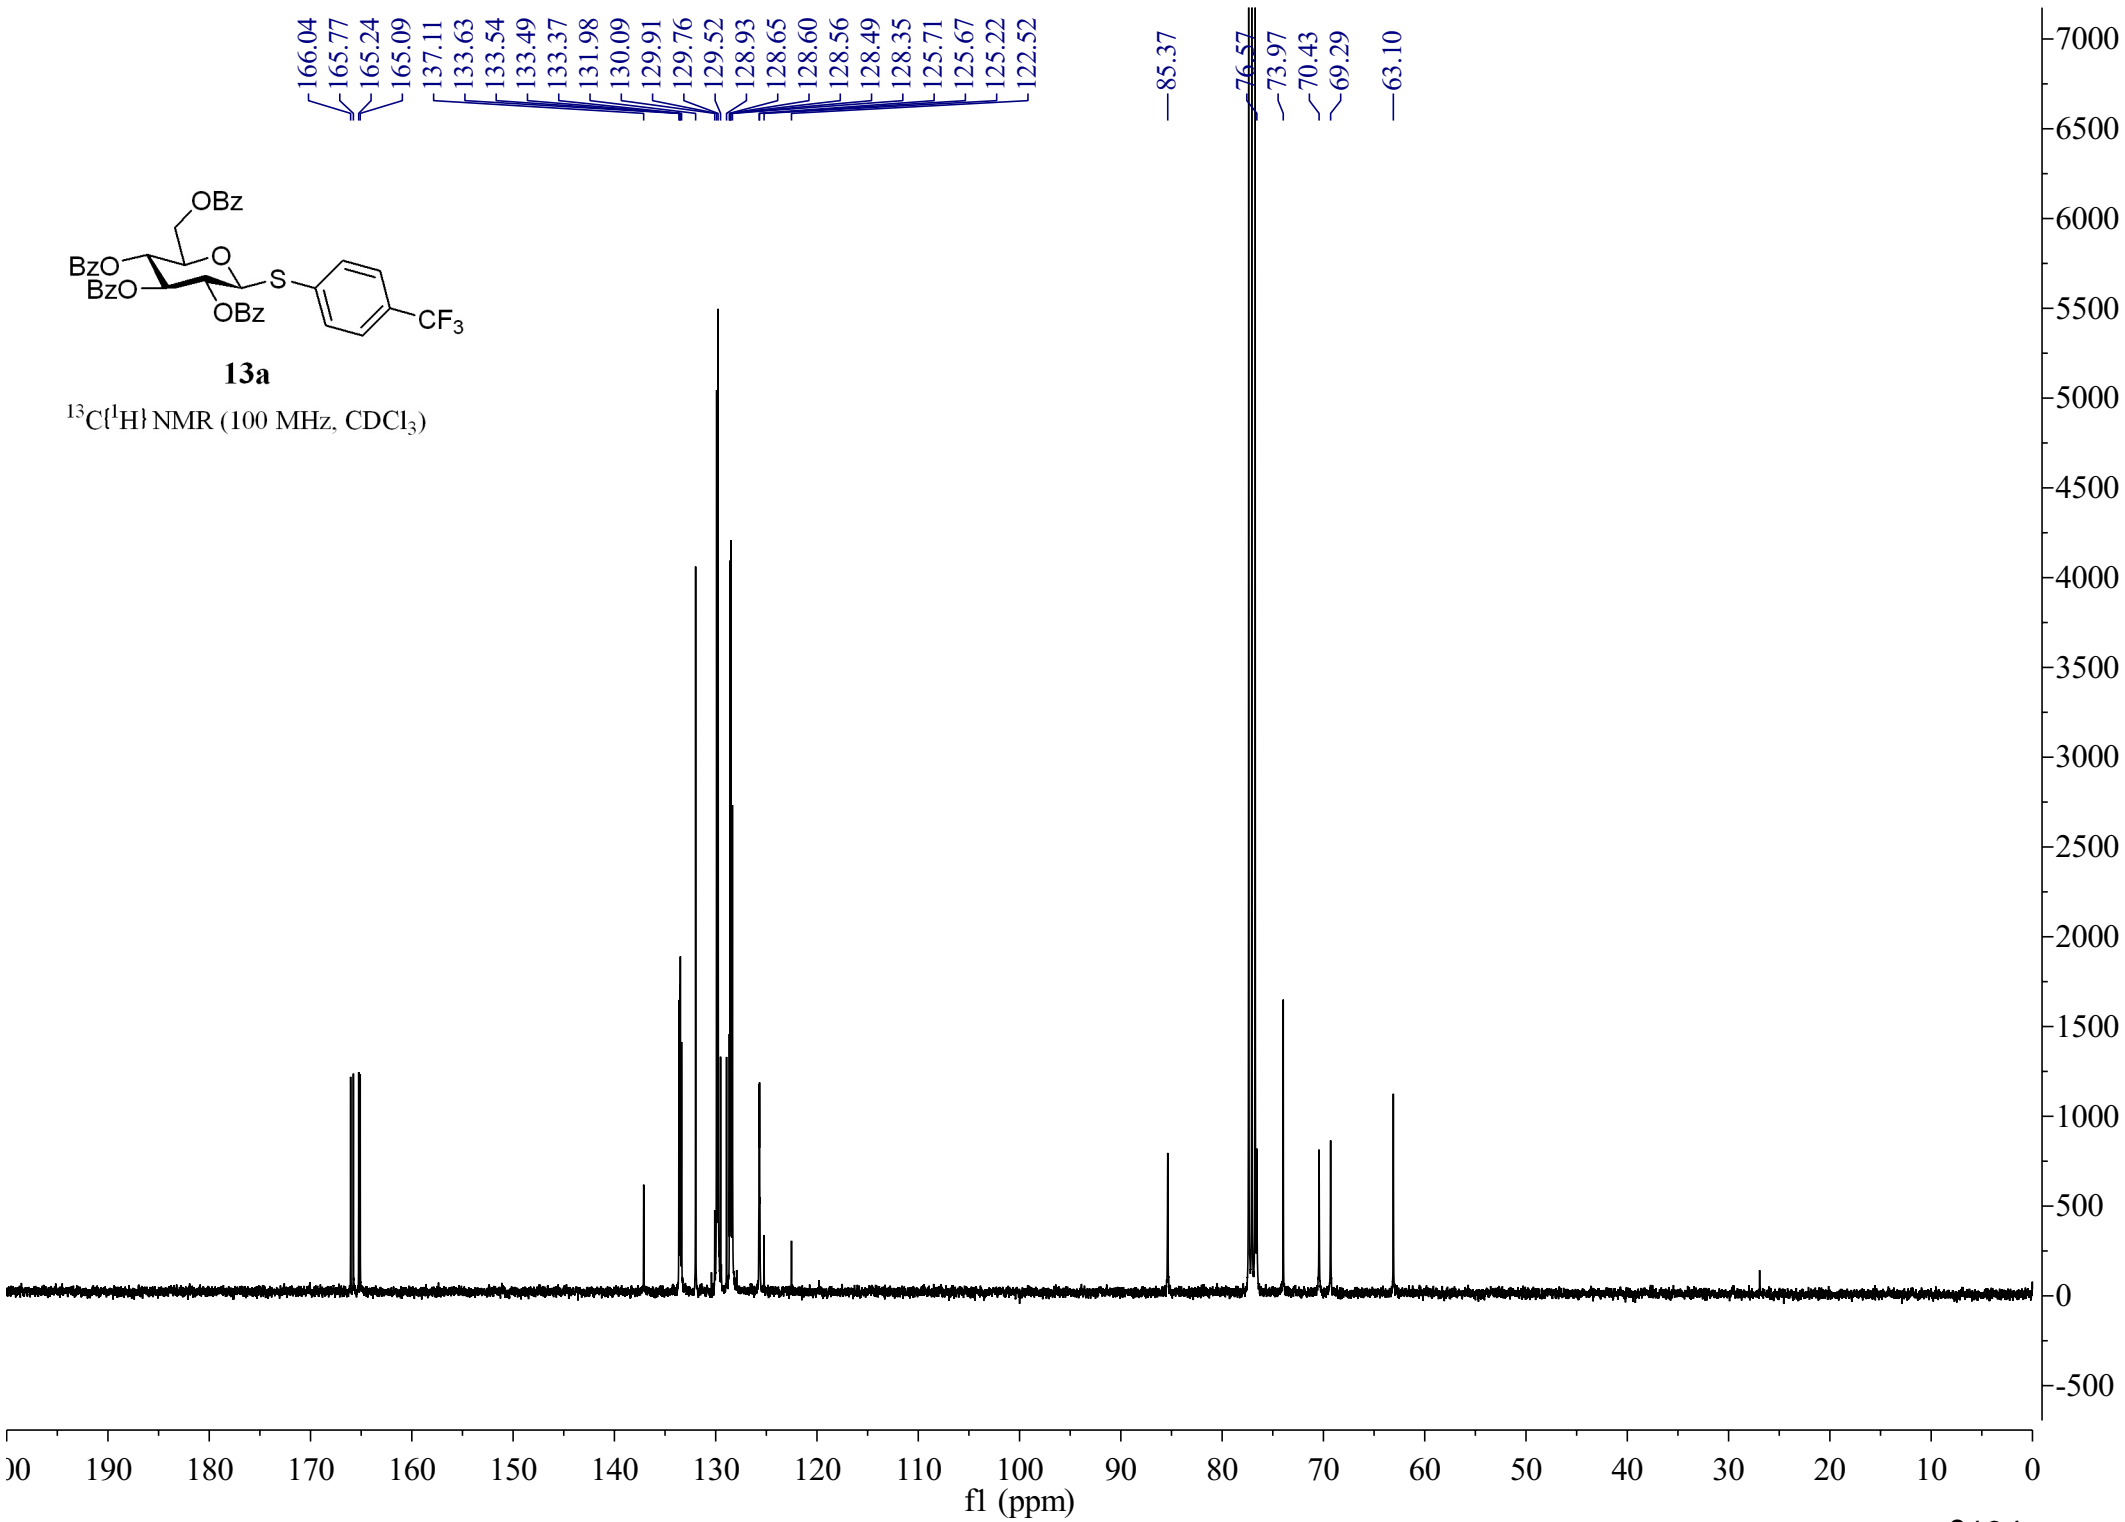

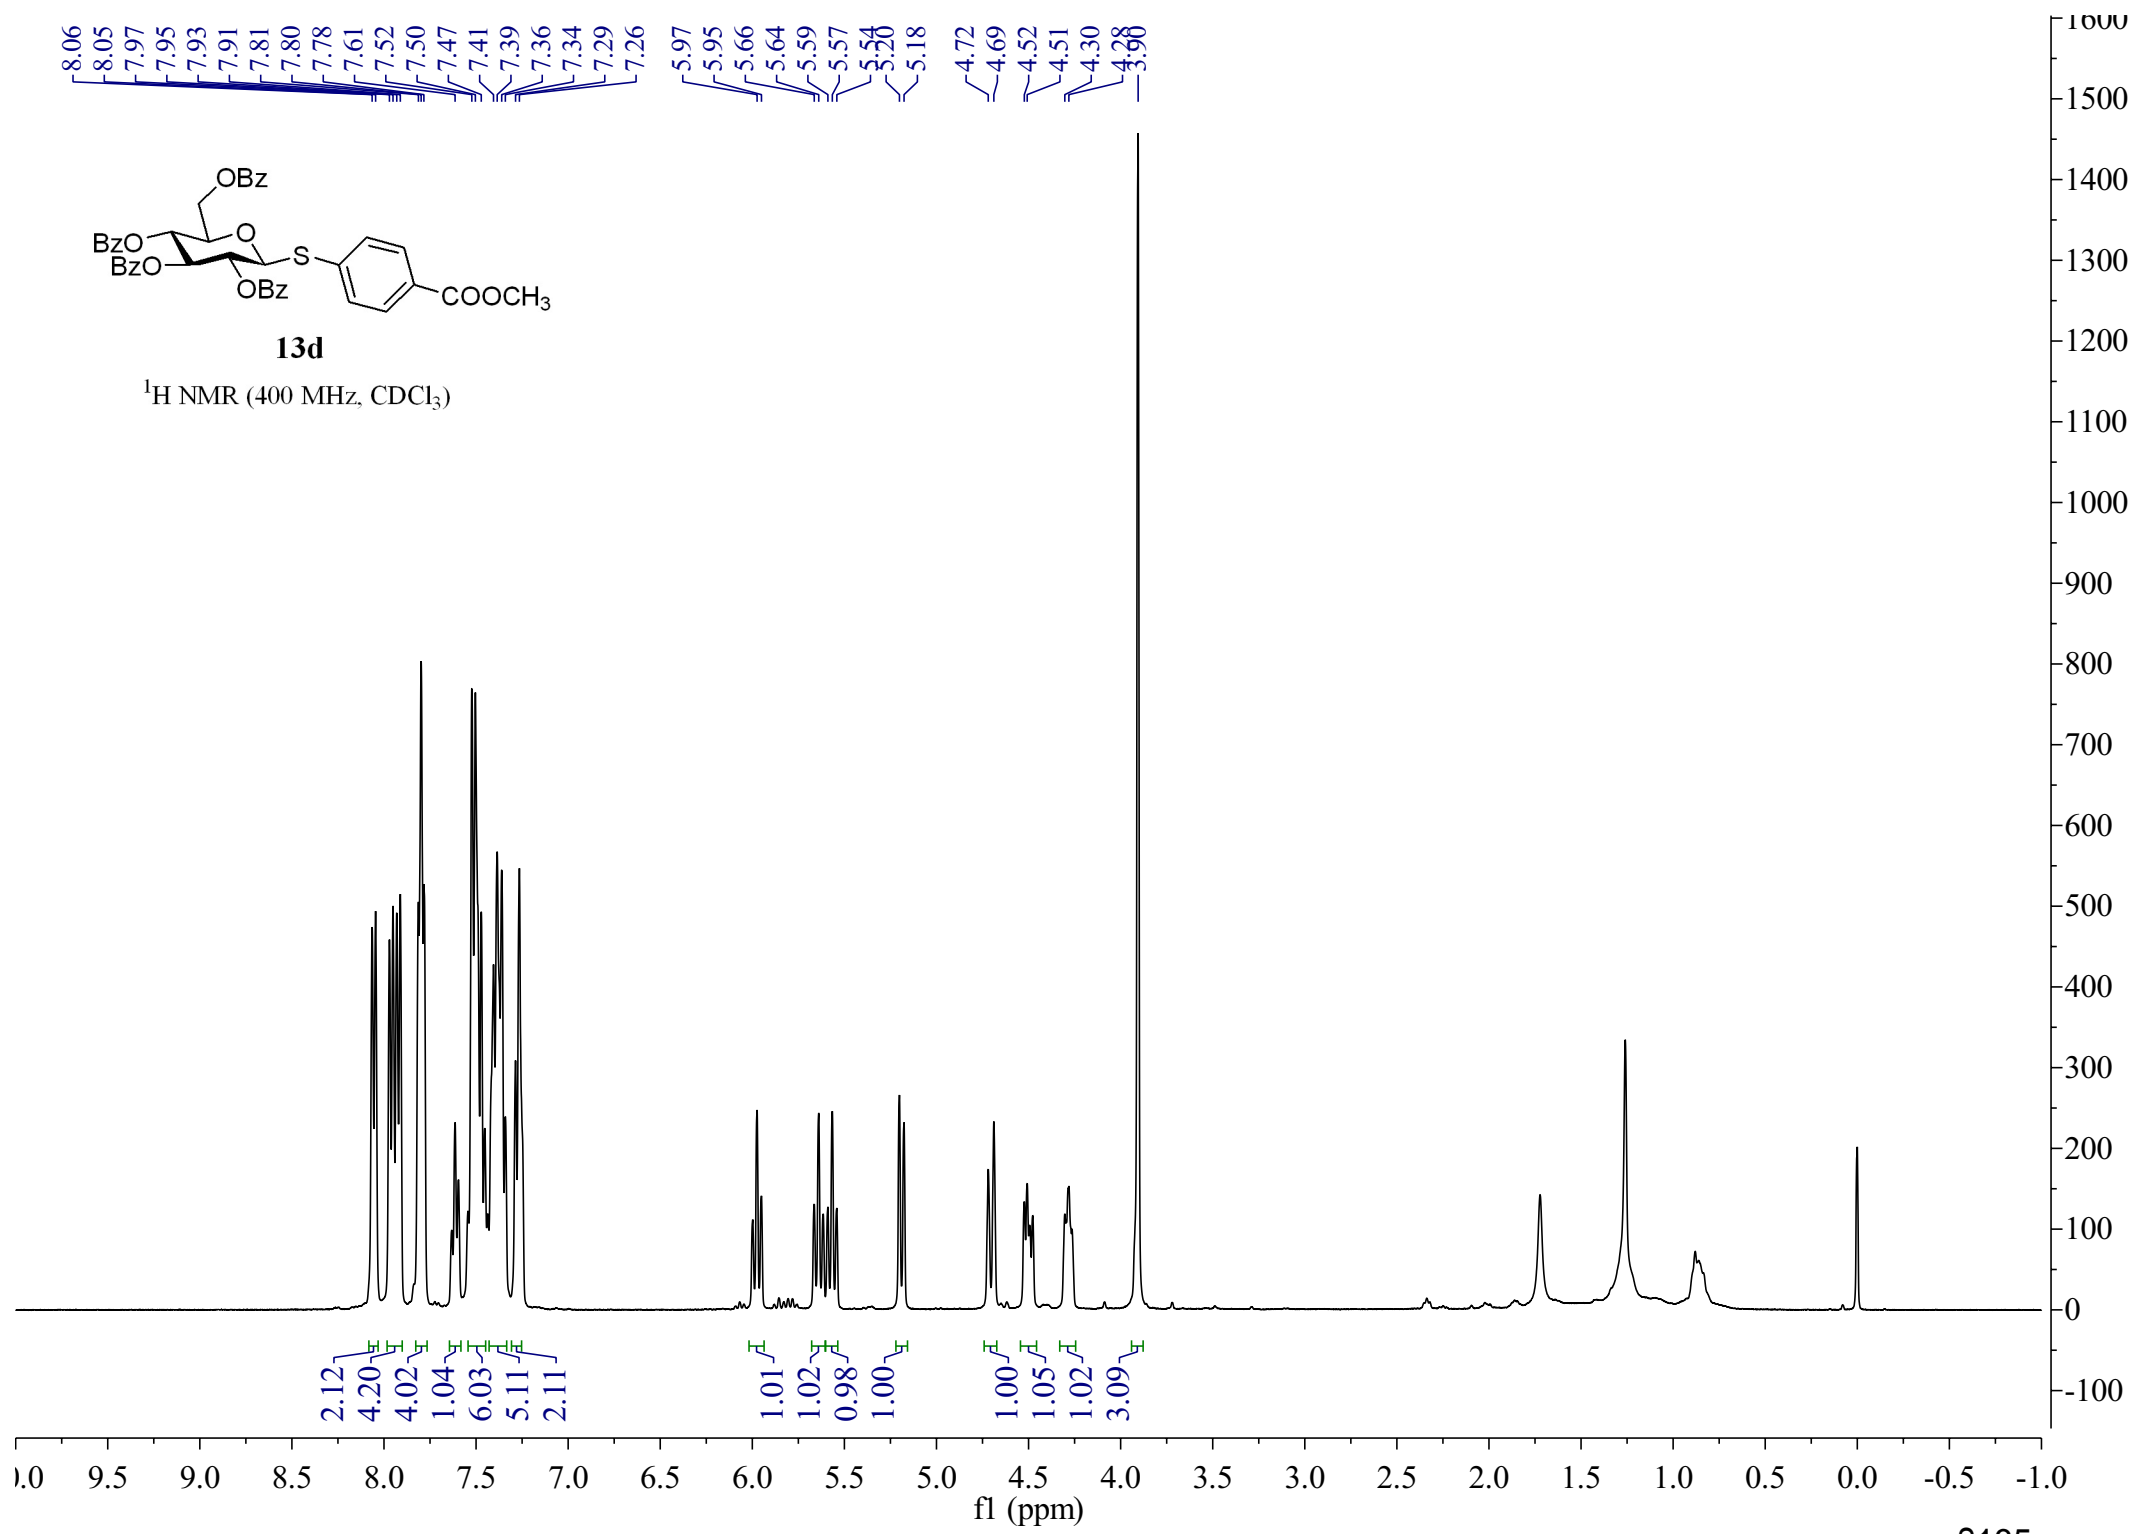

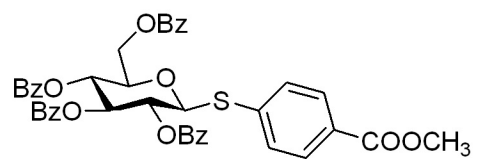

**13d**

$^{13}\text{C}\{^1\text{H}\}$  NMR (100 MHz,  $\text{CDCl}_3$ )

166.44  
166.06  
165.76  
165.22  
165.09  
138.75  
133.62  
133.52  
133.36  
130.87  
130.01  
129.92  
129.90  
129.79  
129.76  
129.49  
129.26  
128.92  
128.64  
128.60  
128.55  
128.50  
128.48  
128.34

85.33

76.55

73.97

70.38

69.30

63.20

52.17

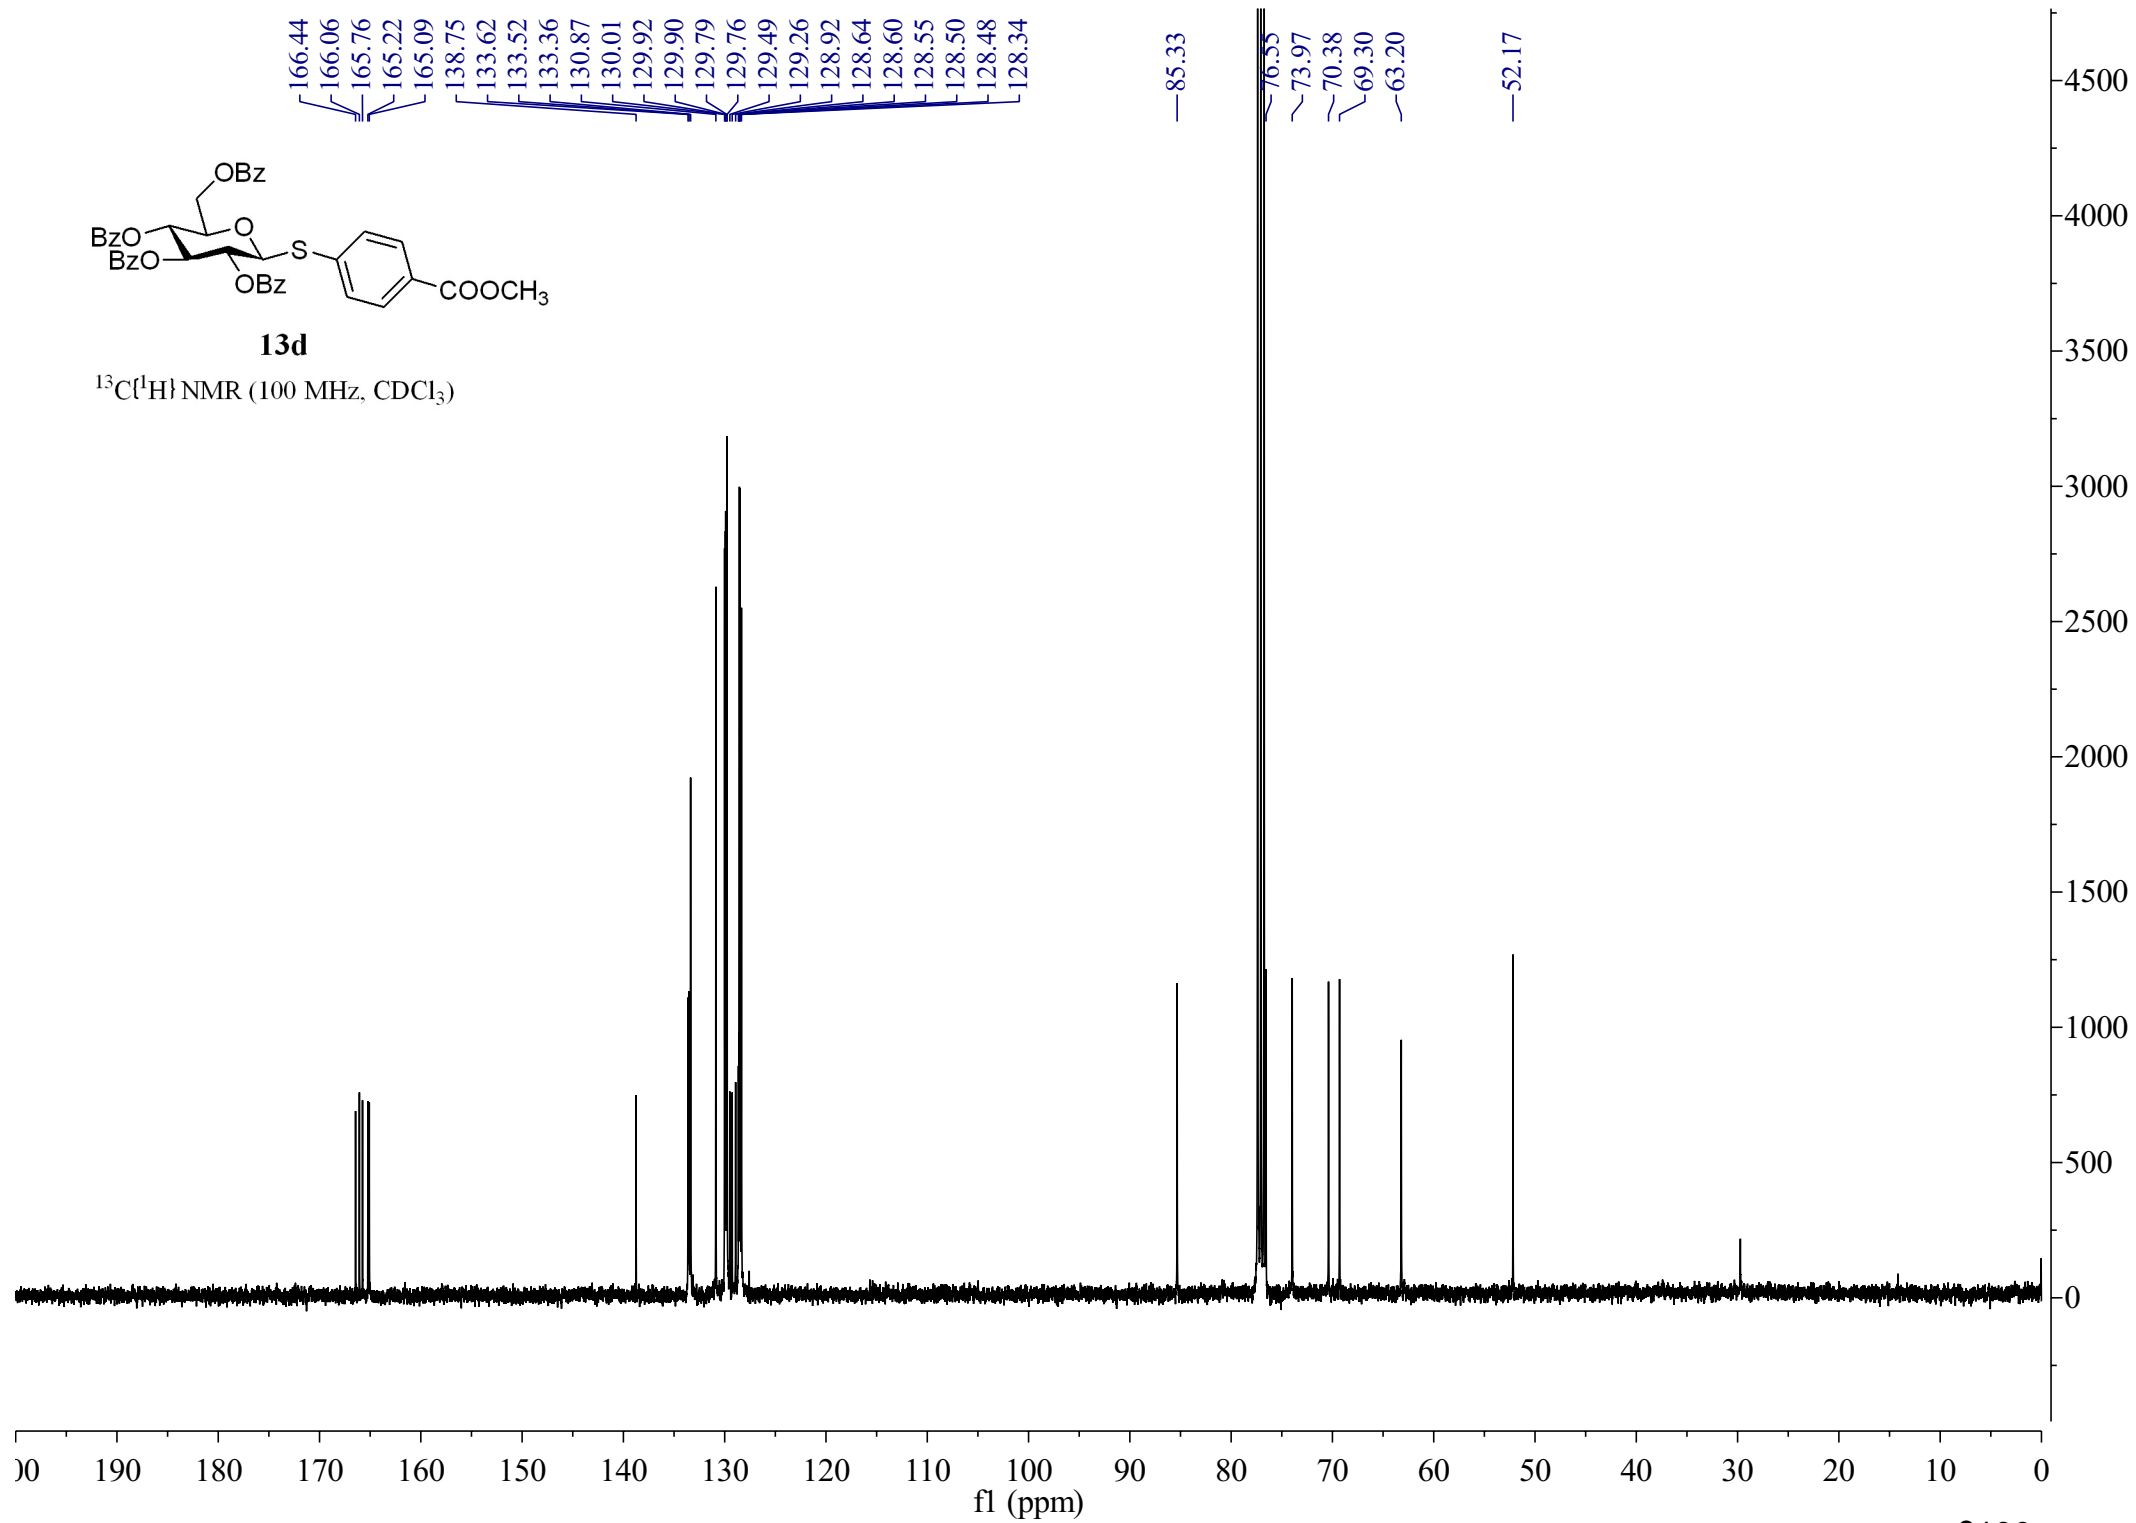



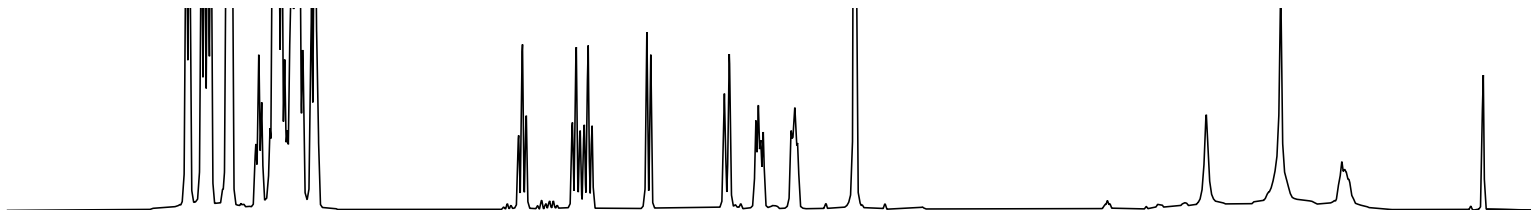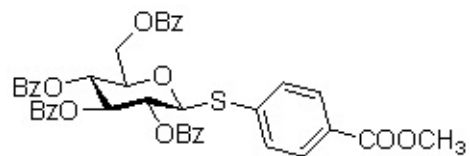

13d

$^1\text{H}$ - $^1\text{H}$  COSY (400 MHz,  $\text{CDCl}_3$ )

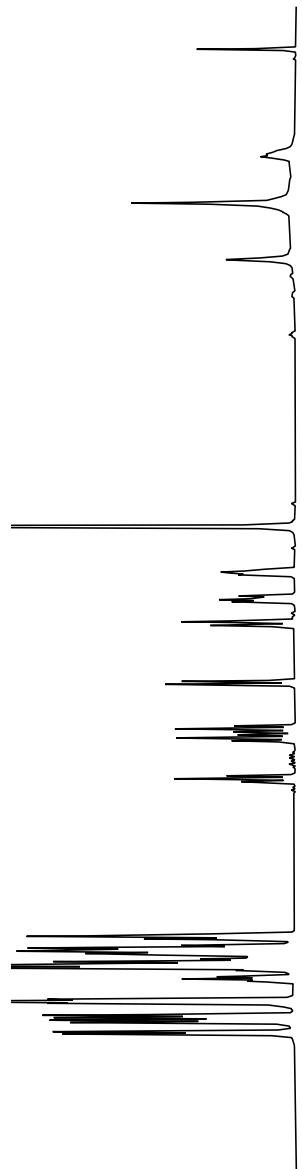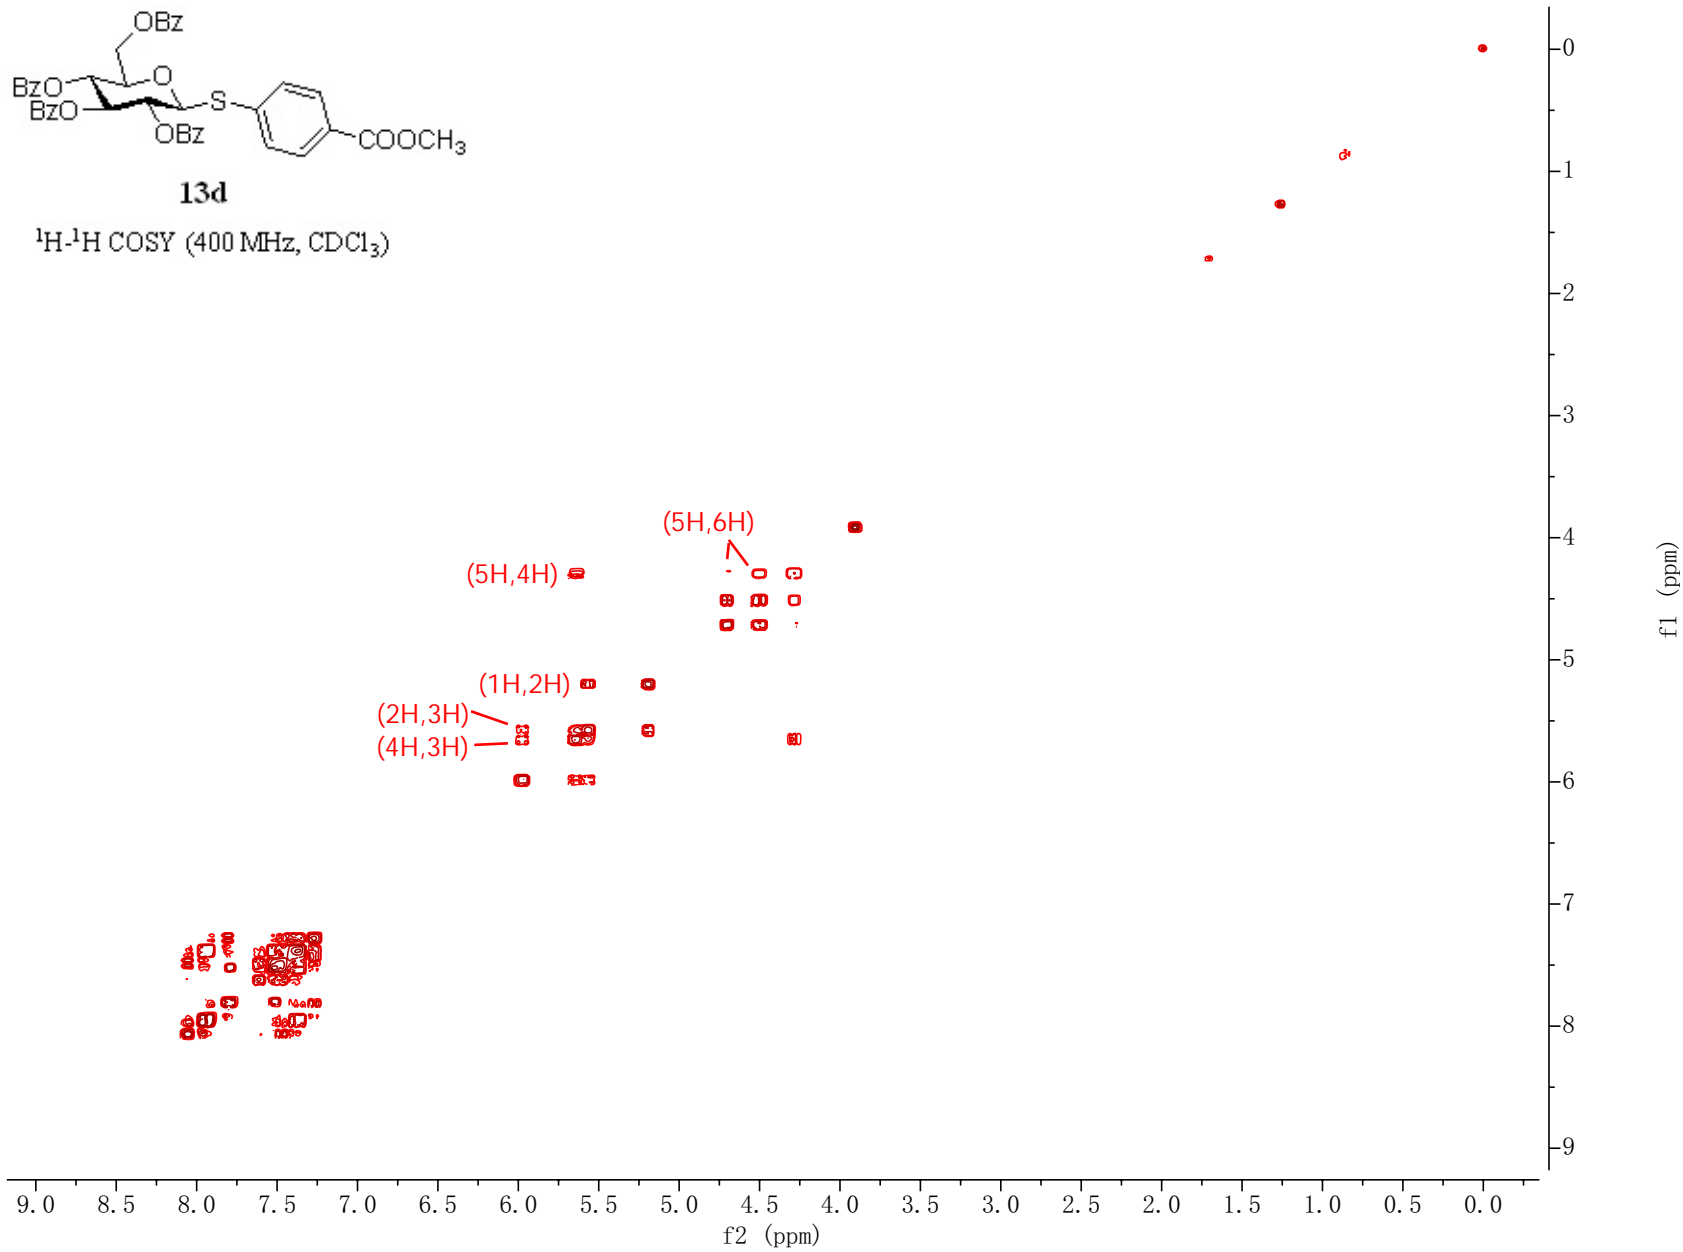

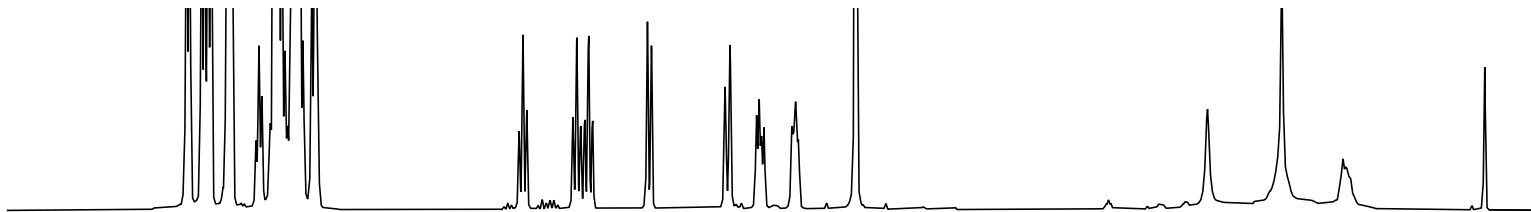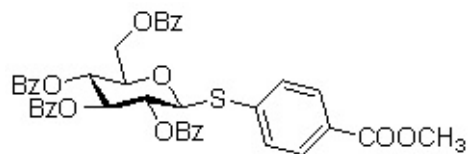

13d

HSQC (400 MHz, CDCl<sub>3</sub>)

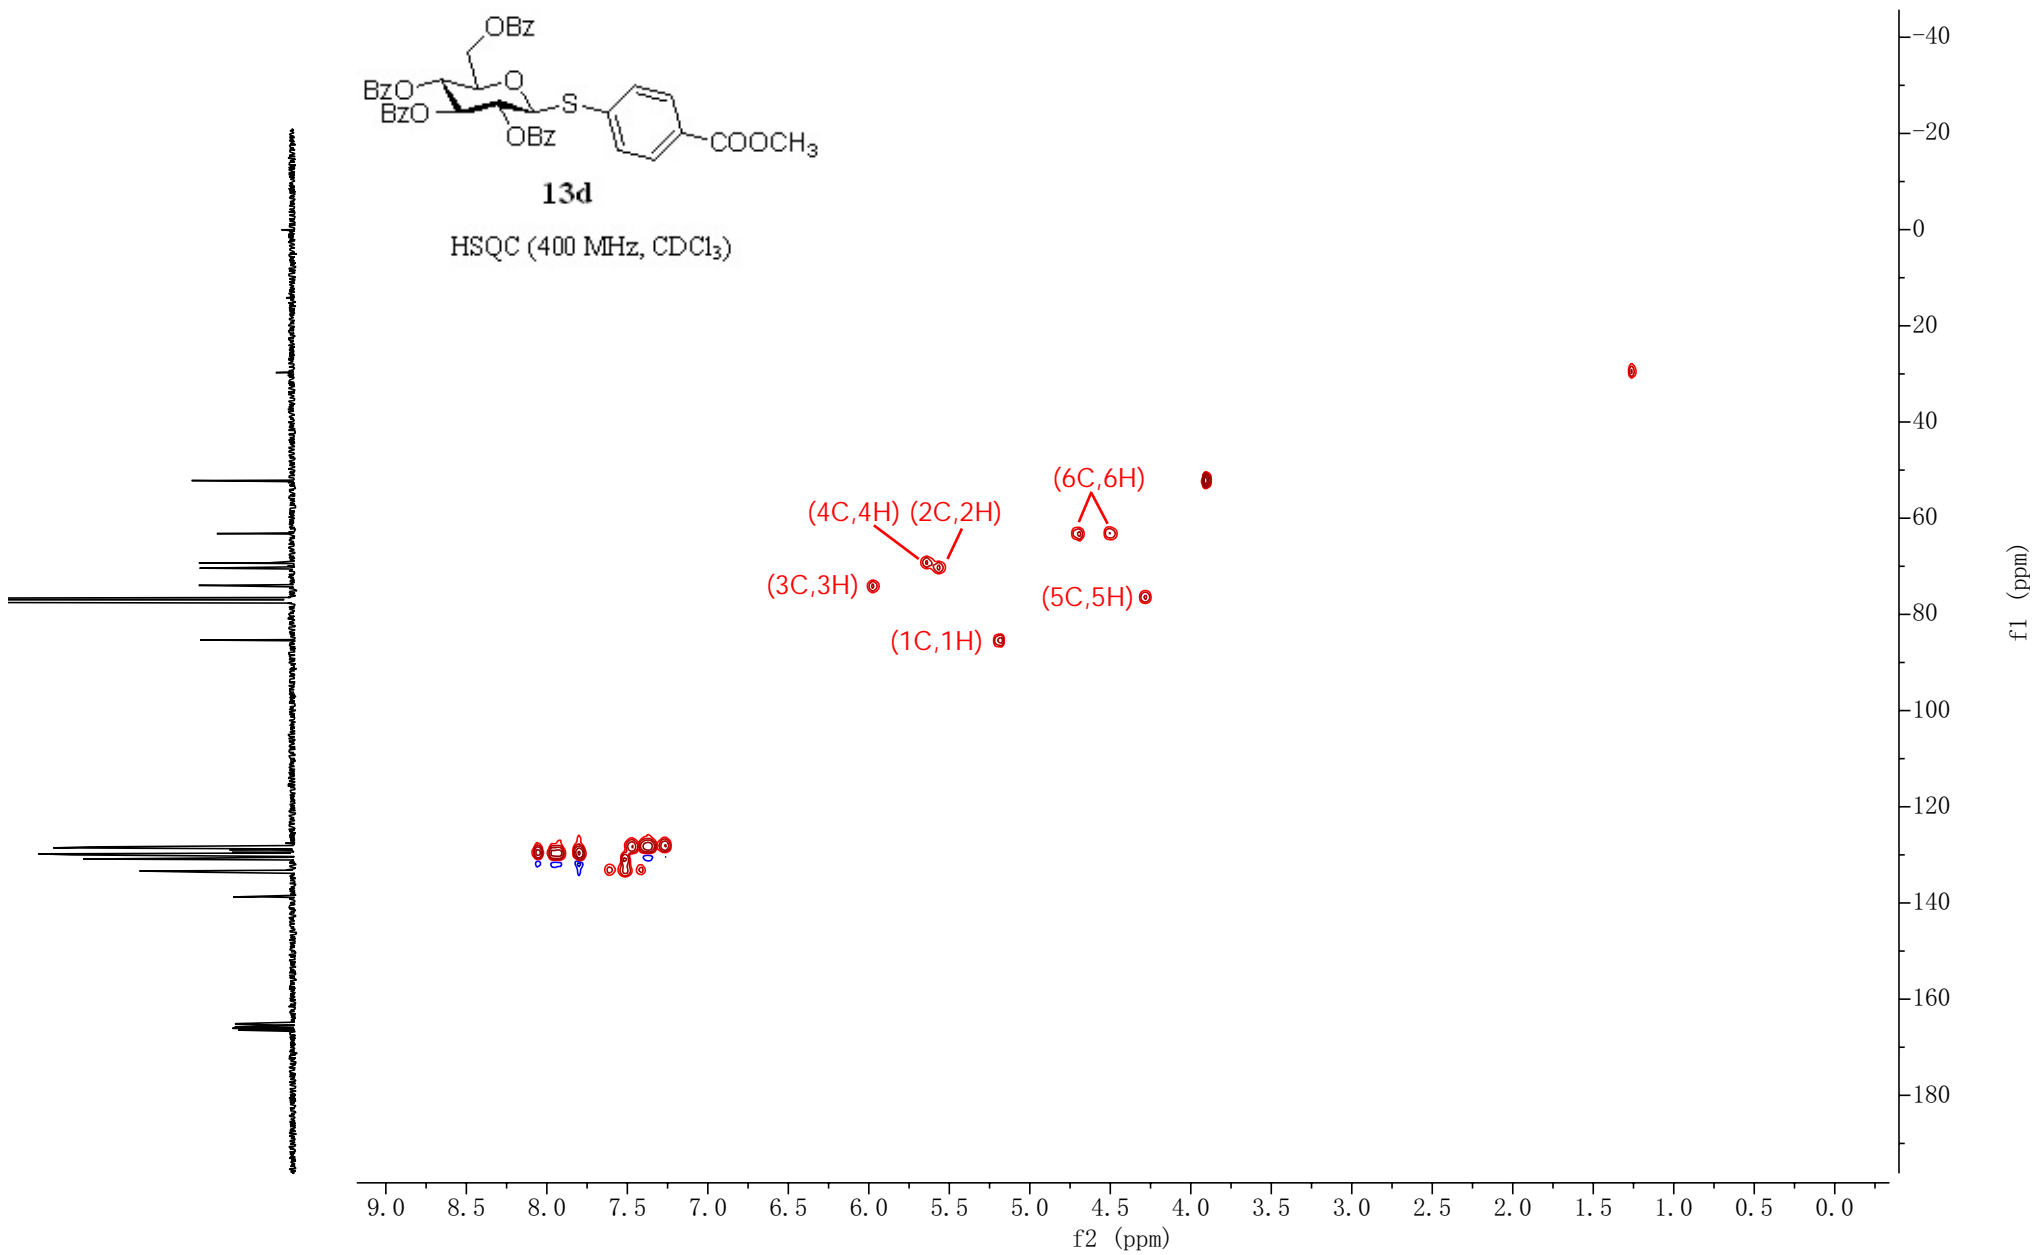

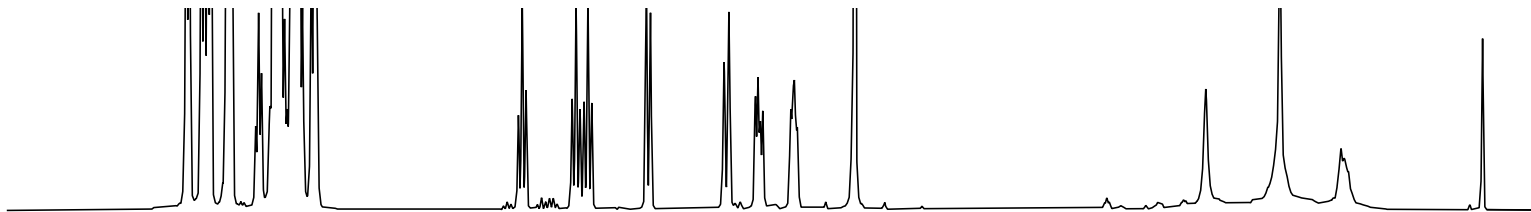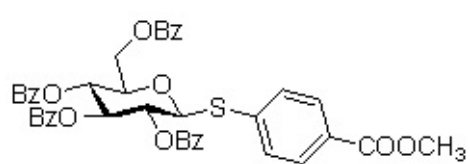

13d

HMBC (400 MHz, CDCl<sub>3</sub>)

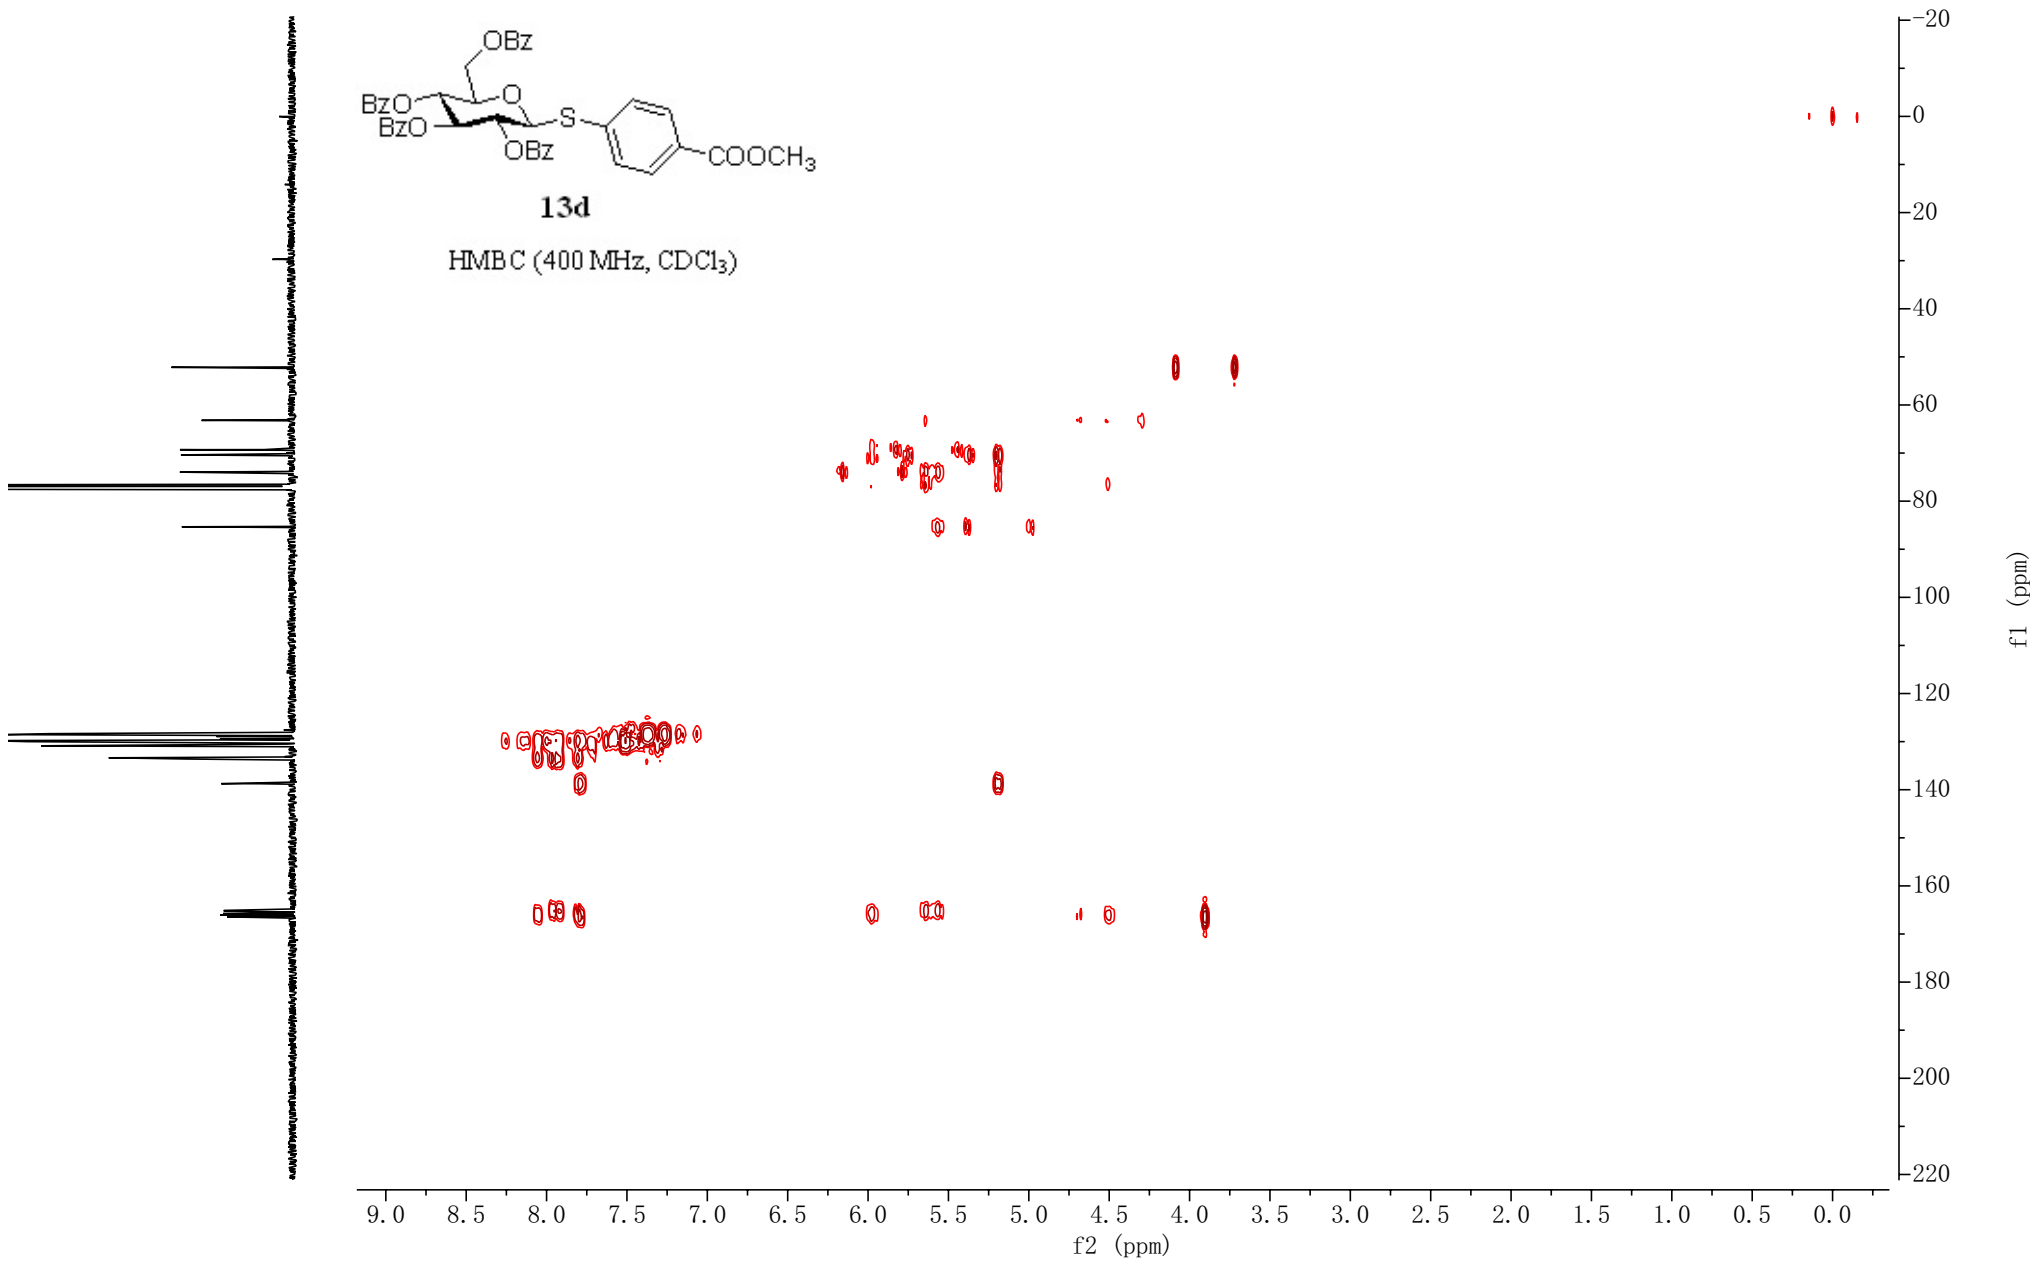

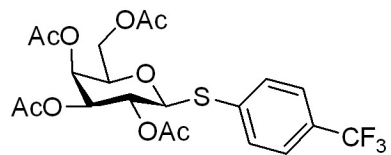

**14a**

<sup>1</sup>H NMR (400 MHz, CDCl<sub>3</sub>)

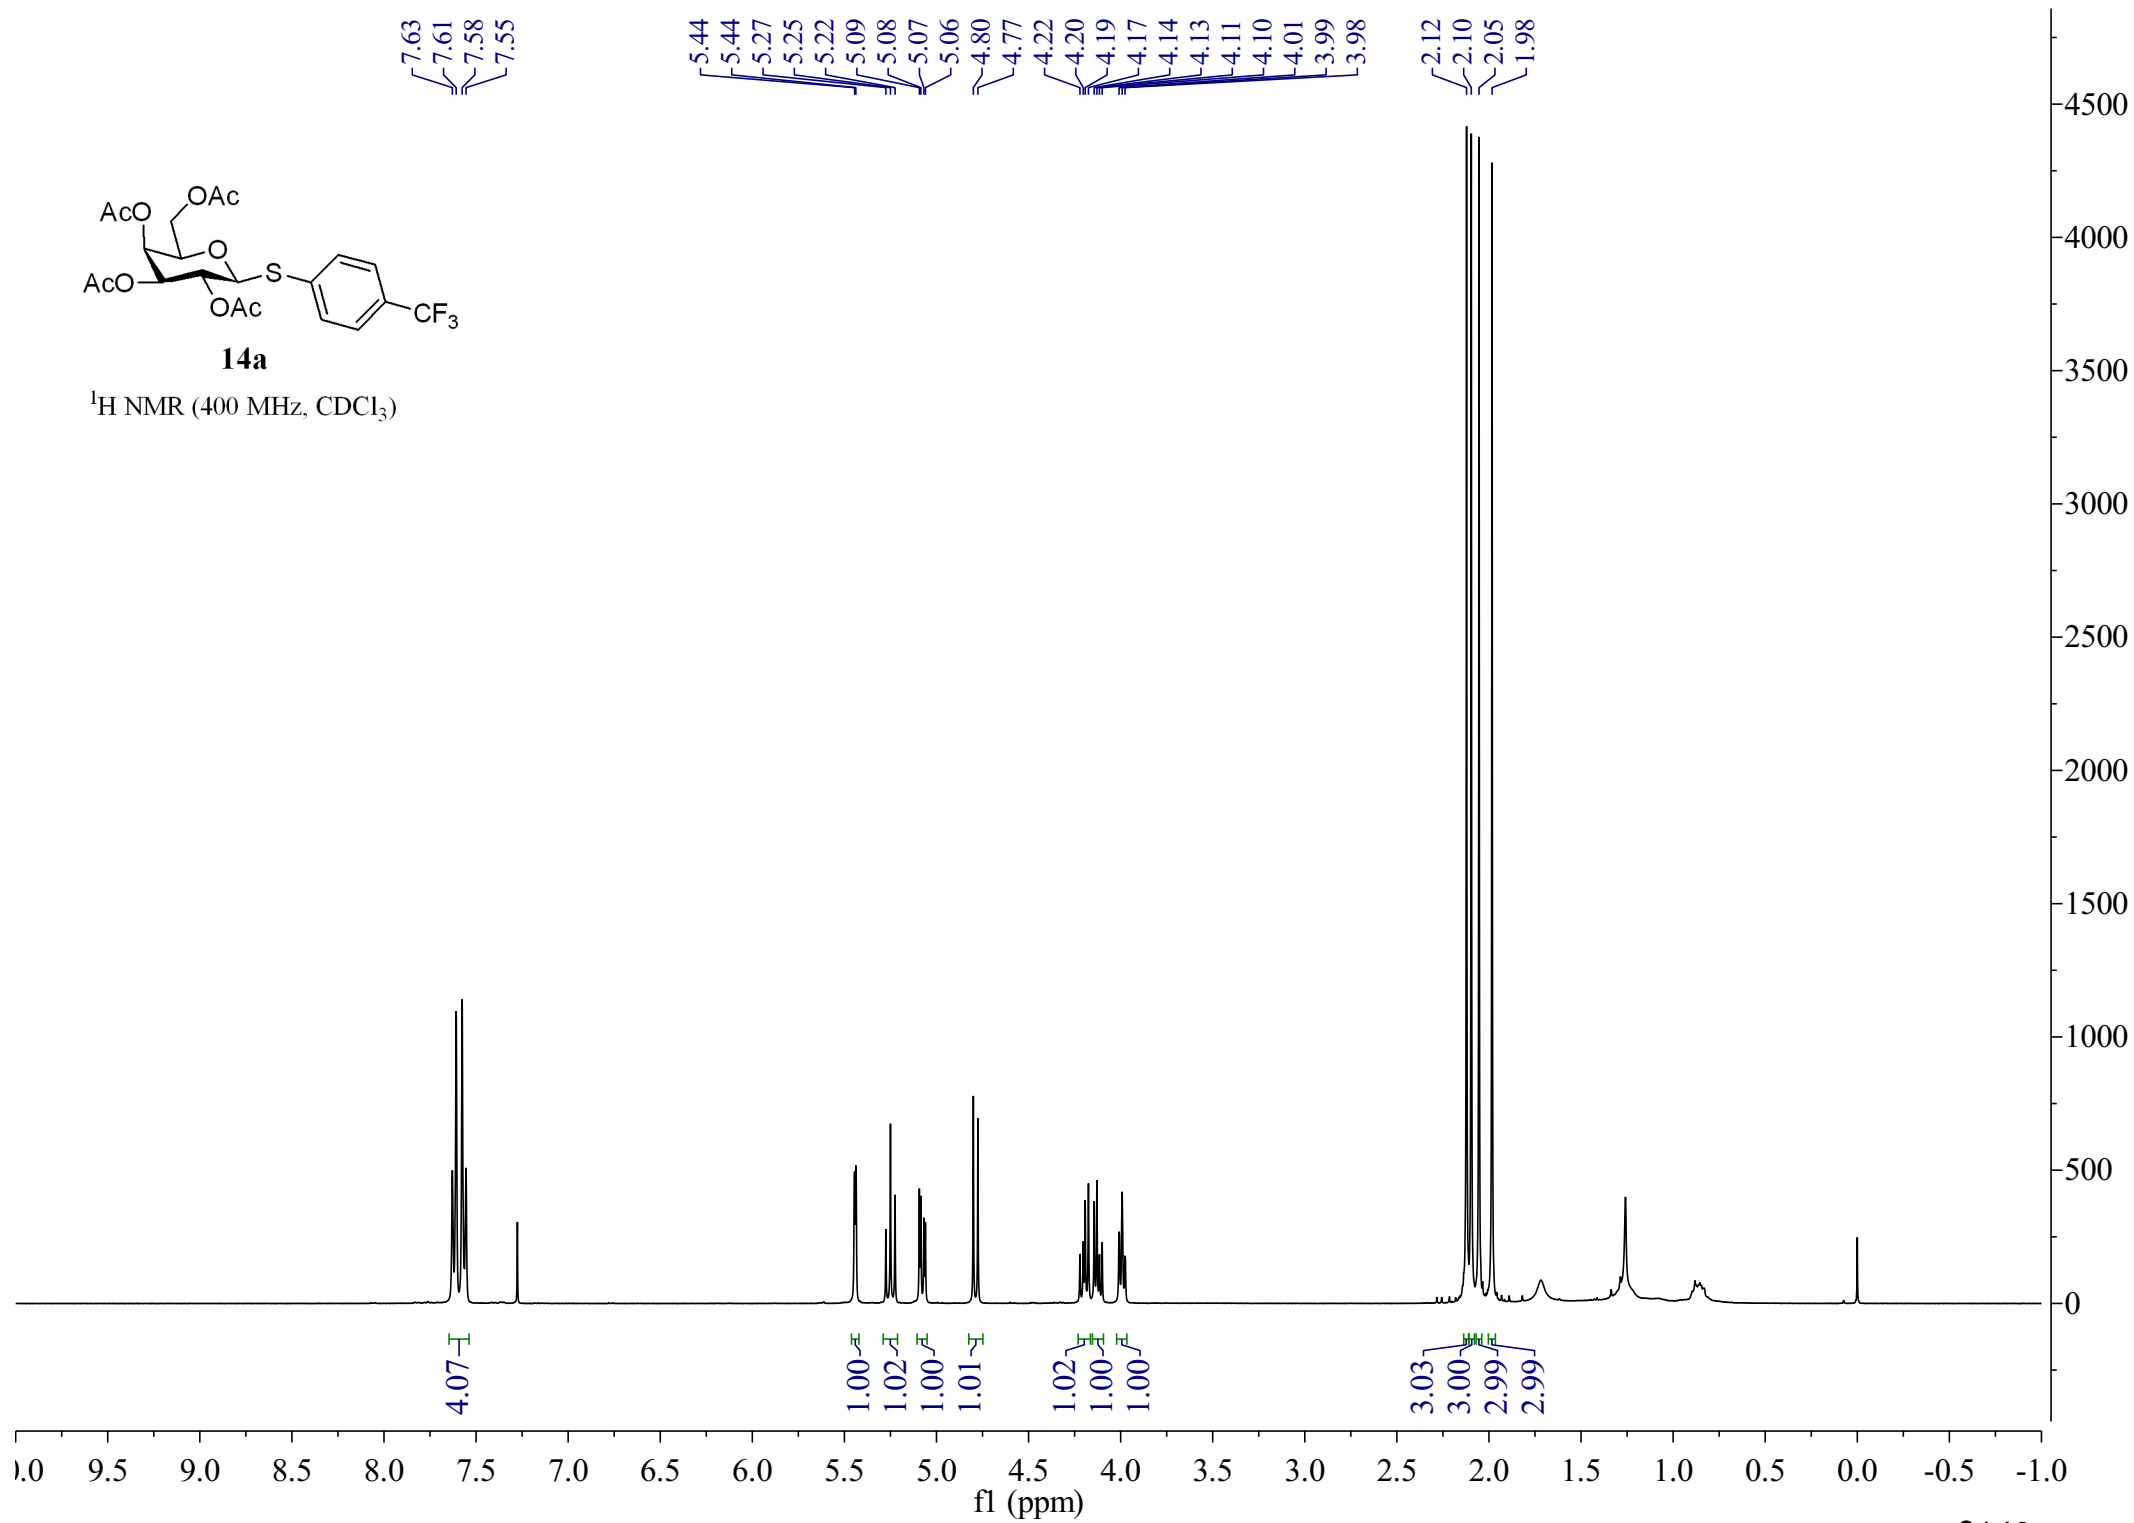

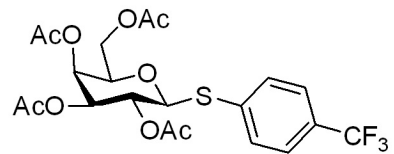

**14a**

$^{13}\text{C}\{^1\text{H}\}$  NMR (100 MHz,  $\text{CDCl}_3$ )

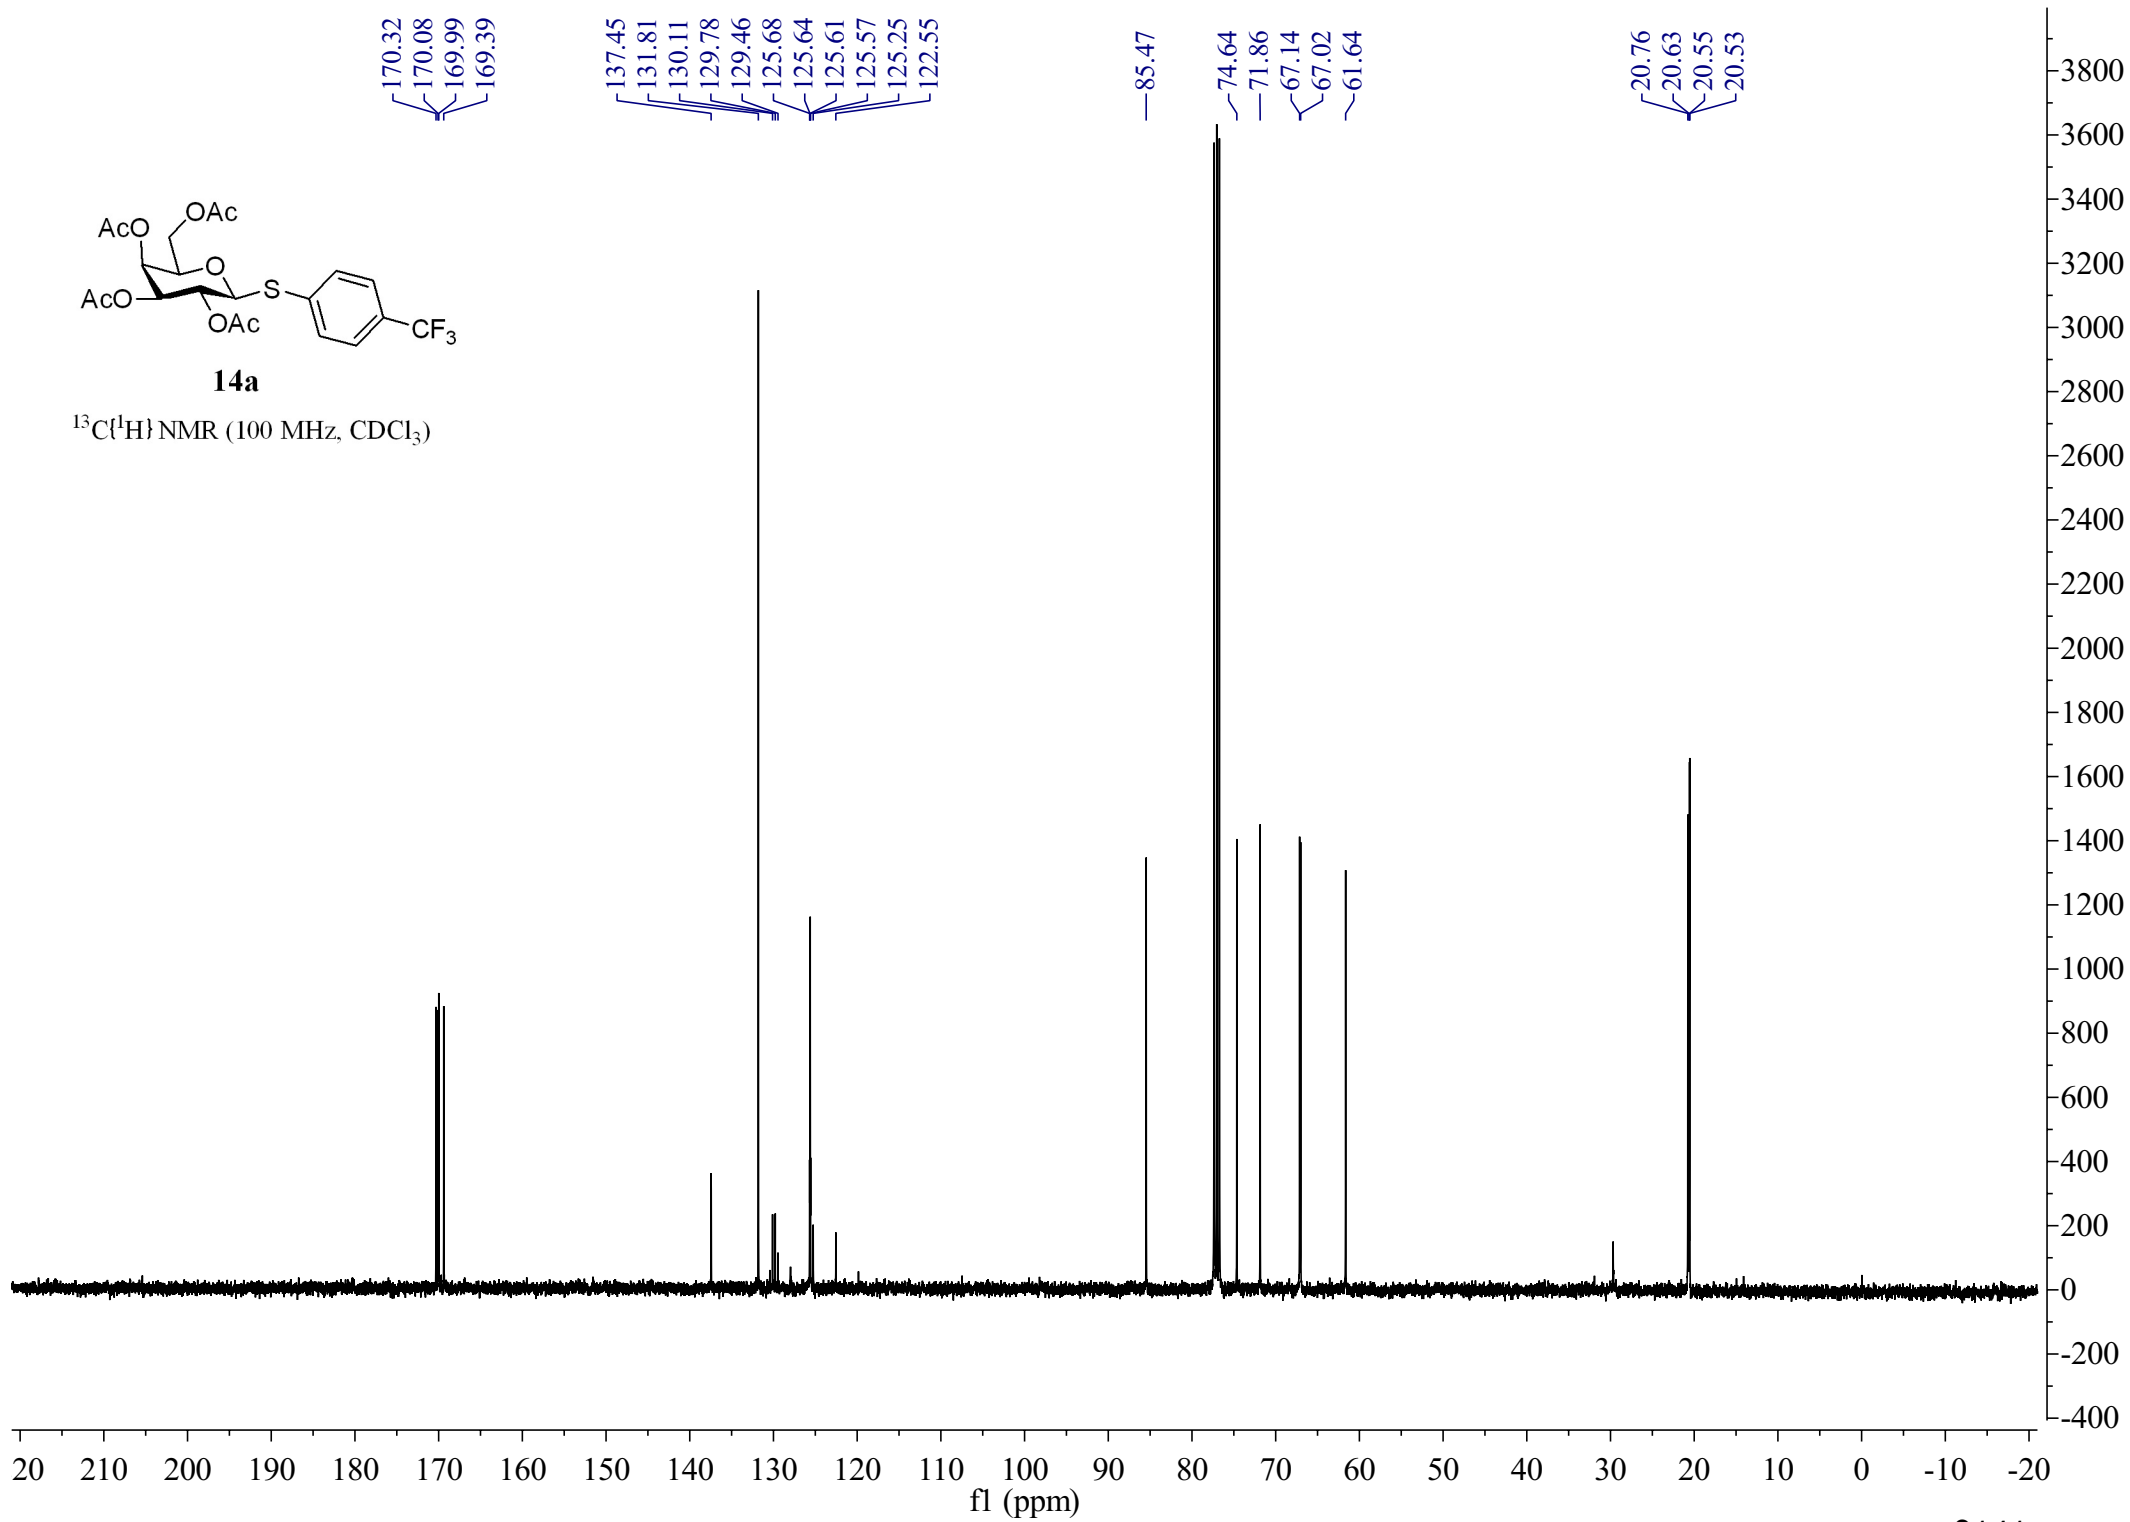

Supplement: d4ob00442f1.pdf [file d4ob00442f1.pdf]
