# Supplementary material for: Electrochemical nickel-catalyzed cross-coupling of glycosyl thiols with preactivated phenols and ketones
Source: Royal Society of Chemistry journal article supplement (doi:10.1039/d4ob00442f), 2024-01-01

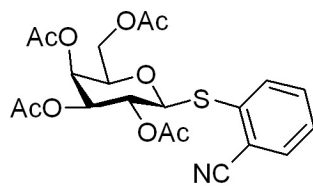**14i**<sup>1</sup>H NMR (400 MHz, CDCl<sub>3</sub>)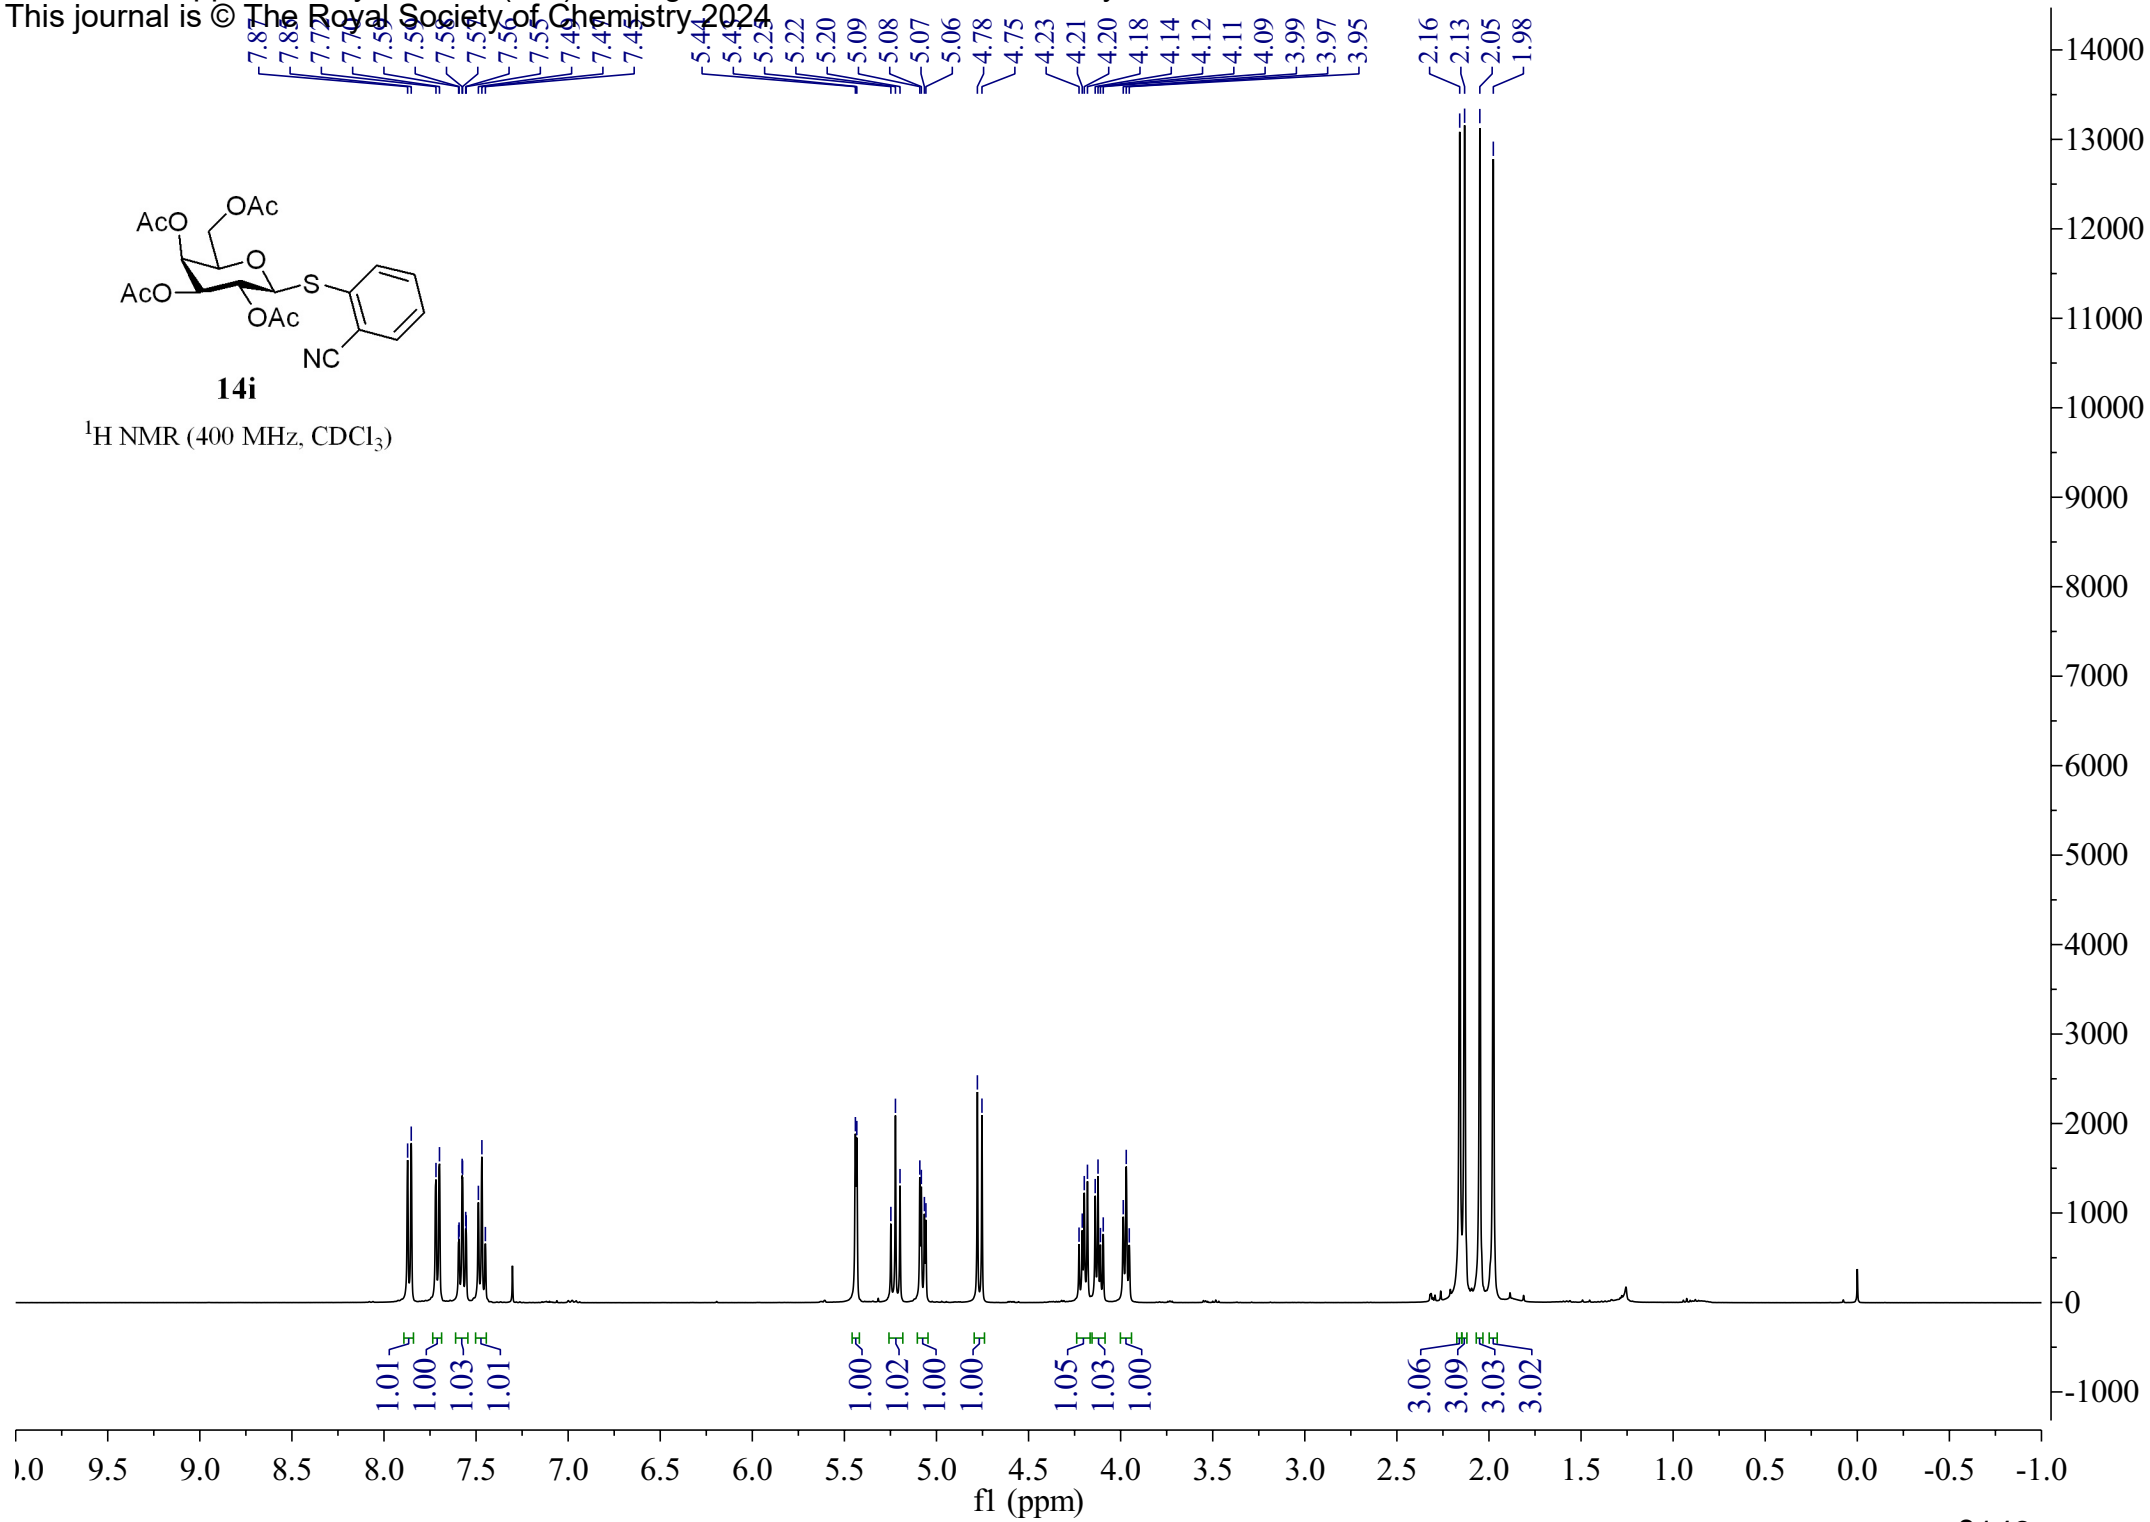

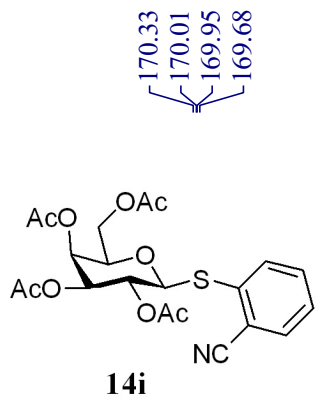

$^{13}\text{C}\{^1\text{H}\}$  NMR (100 MHz,  $\text{CDCl}_3$ )

170.33  
170.01  
169.95  
169.68

135.71  
134.73  
133.71  
132.68  
128.95

117.54  
116.88

85.98

74.65  
71.81  
67.11  
66.61  
61.47

20.81  
20.67  
20.62  
20.54

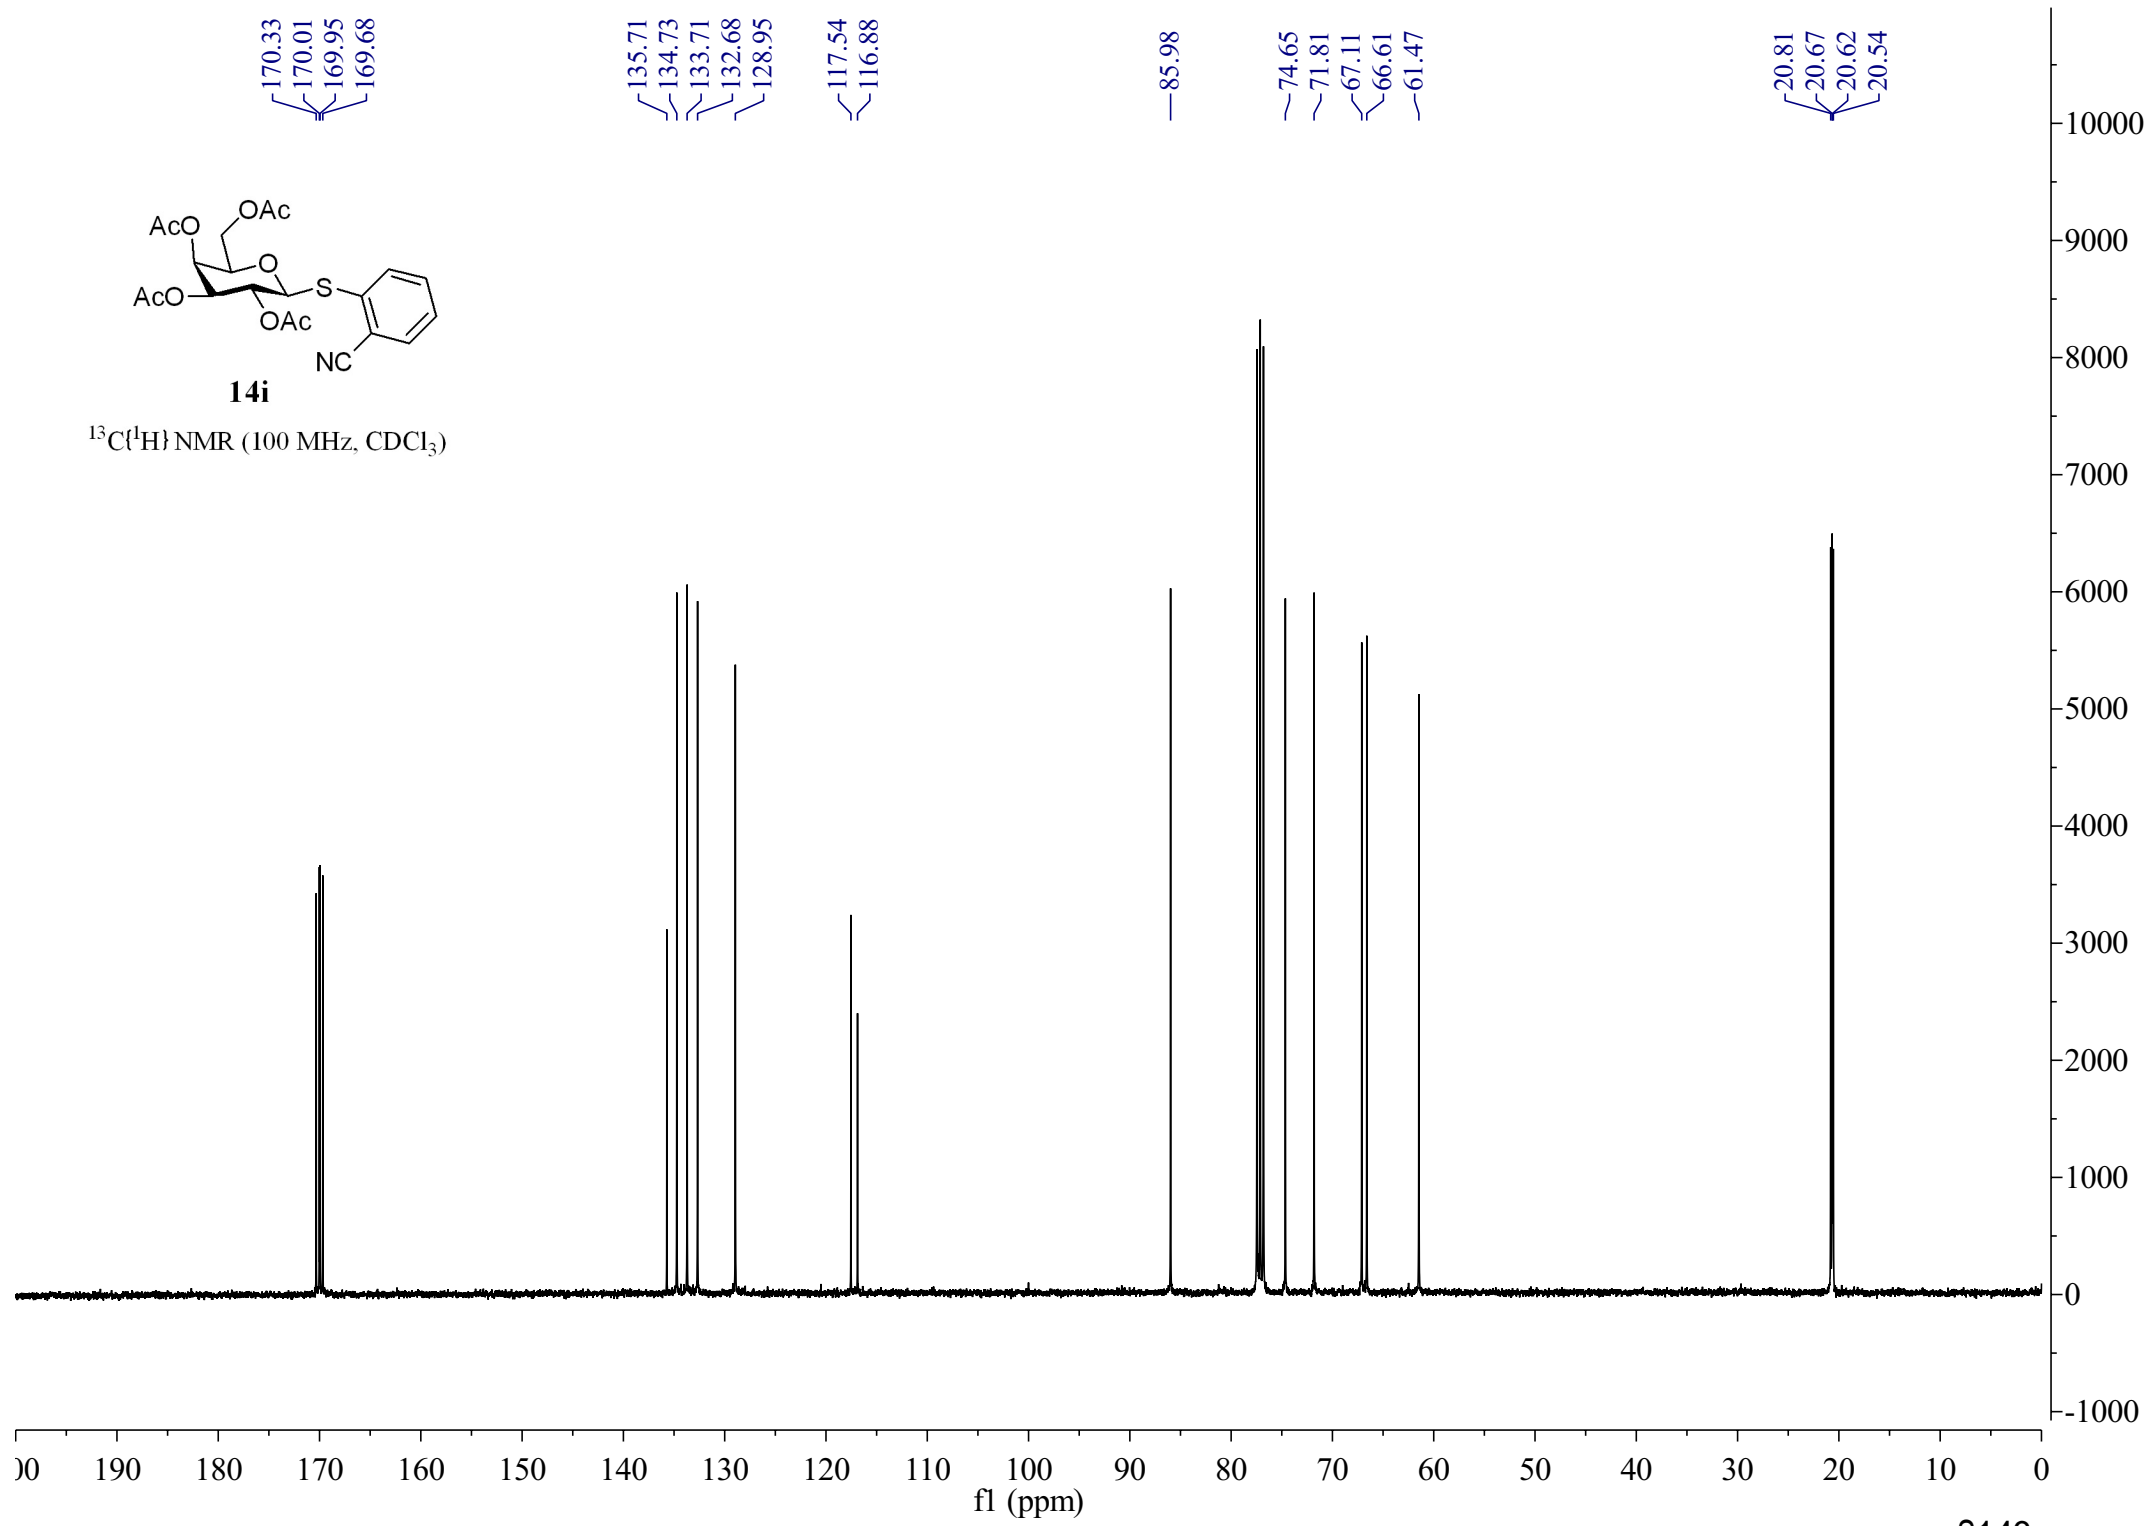

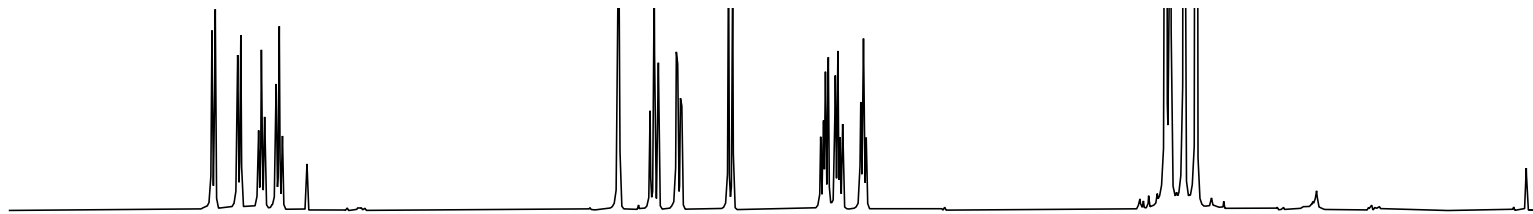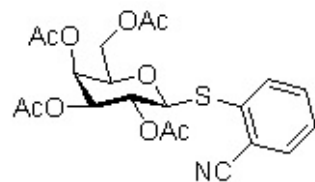

**14i**

$^1\text{H}$ - $^1\text{H}$  COSY (400 MHz,  $\text{CDCl}_3$ )

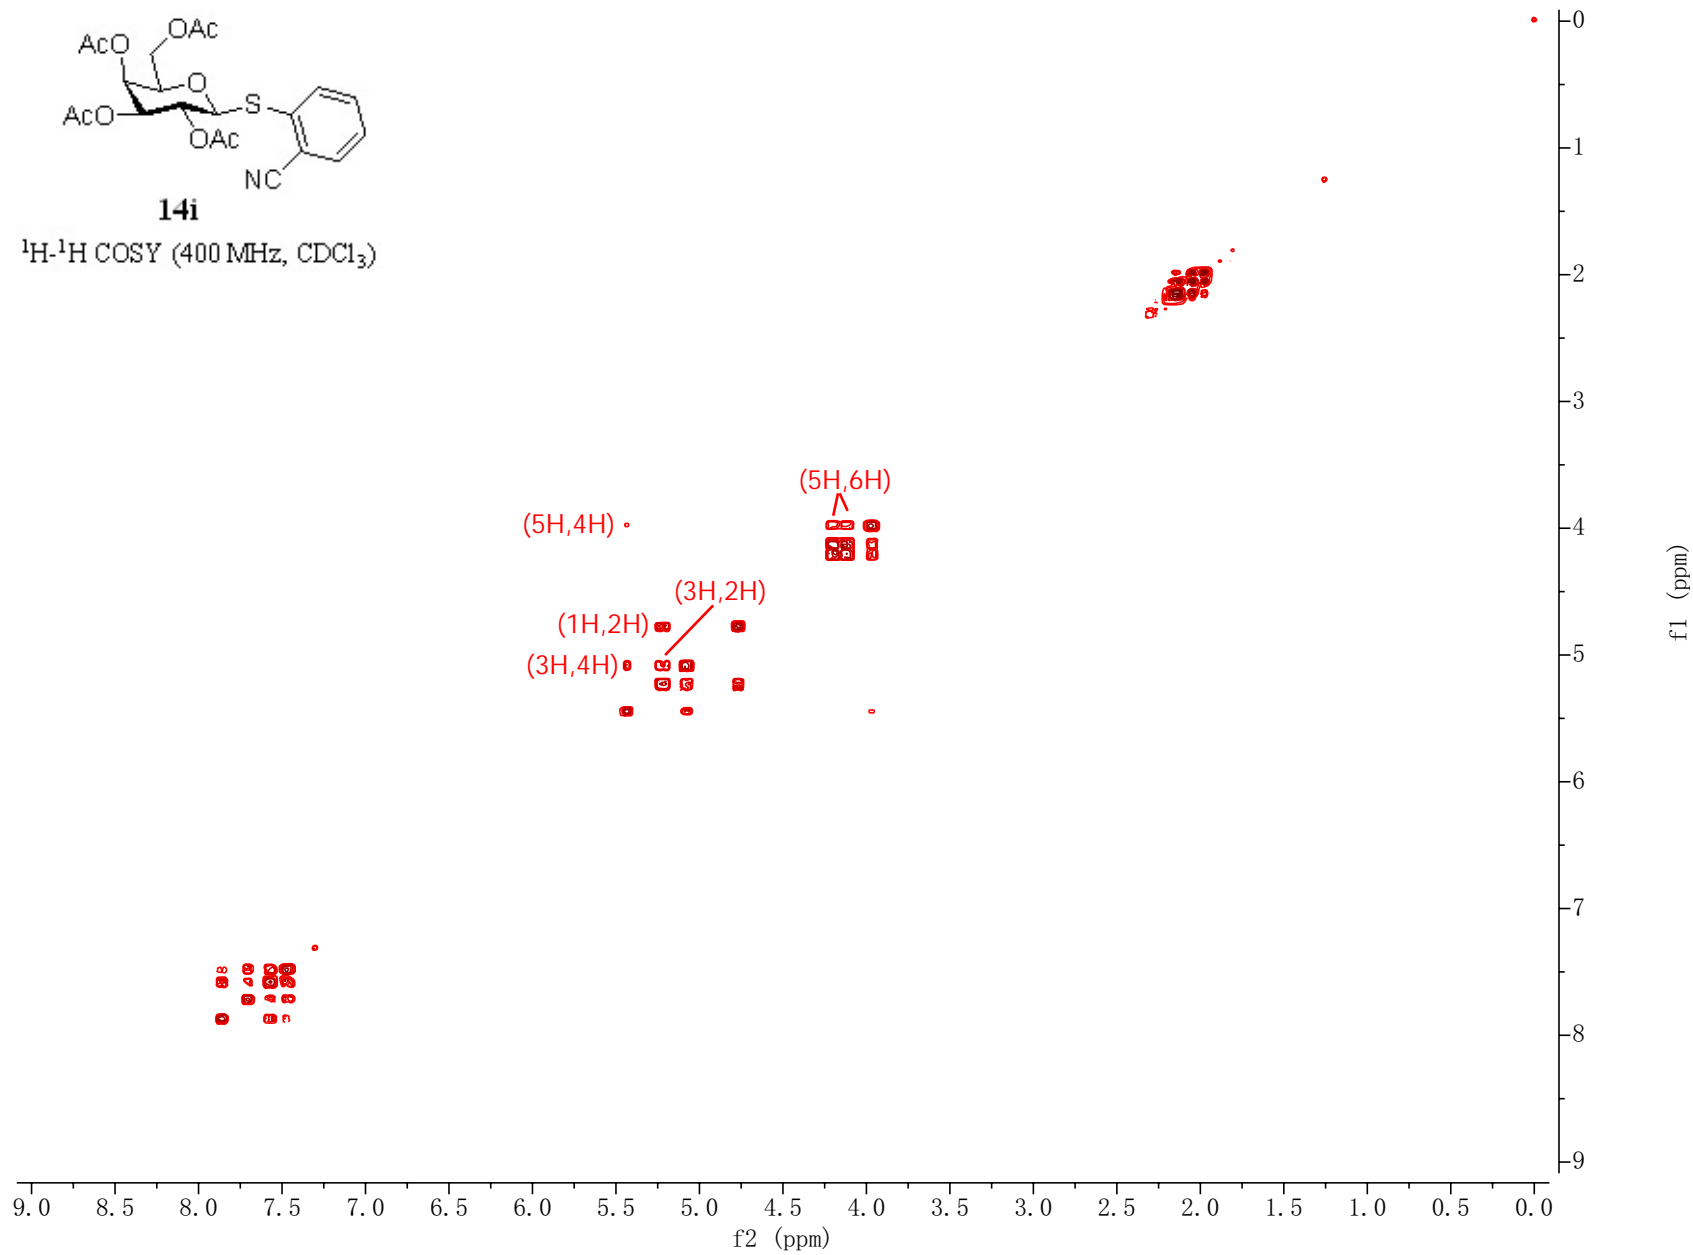

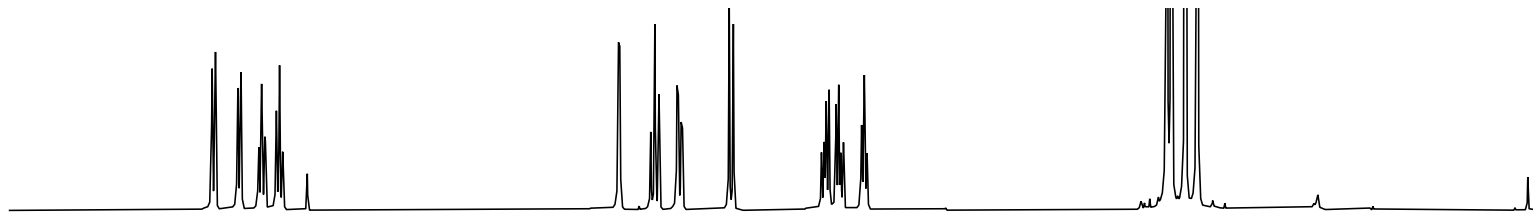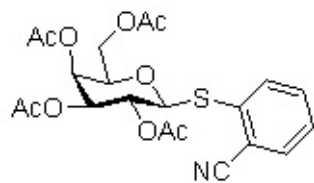

**14i**

HSQC (400 MHz, CDCl<sub>3</sub>)

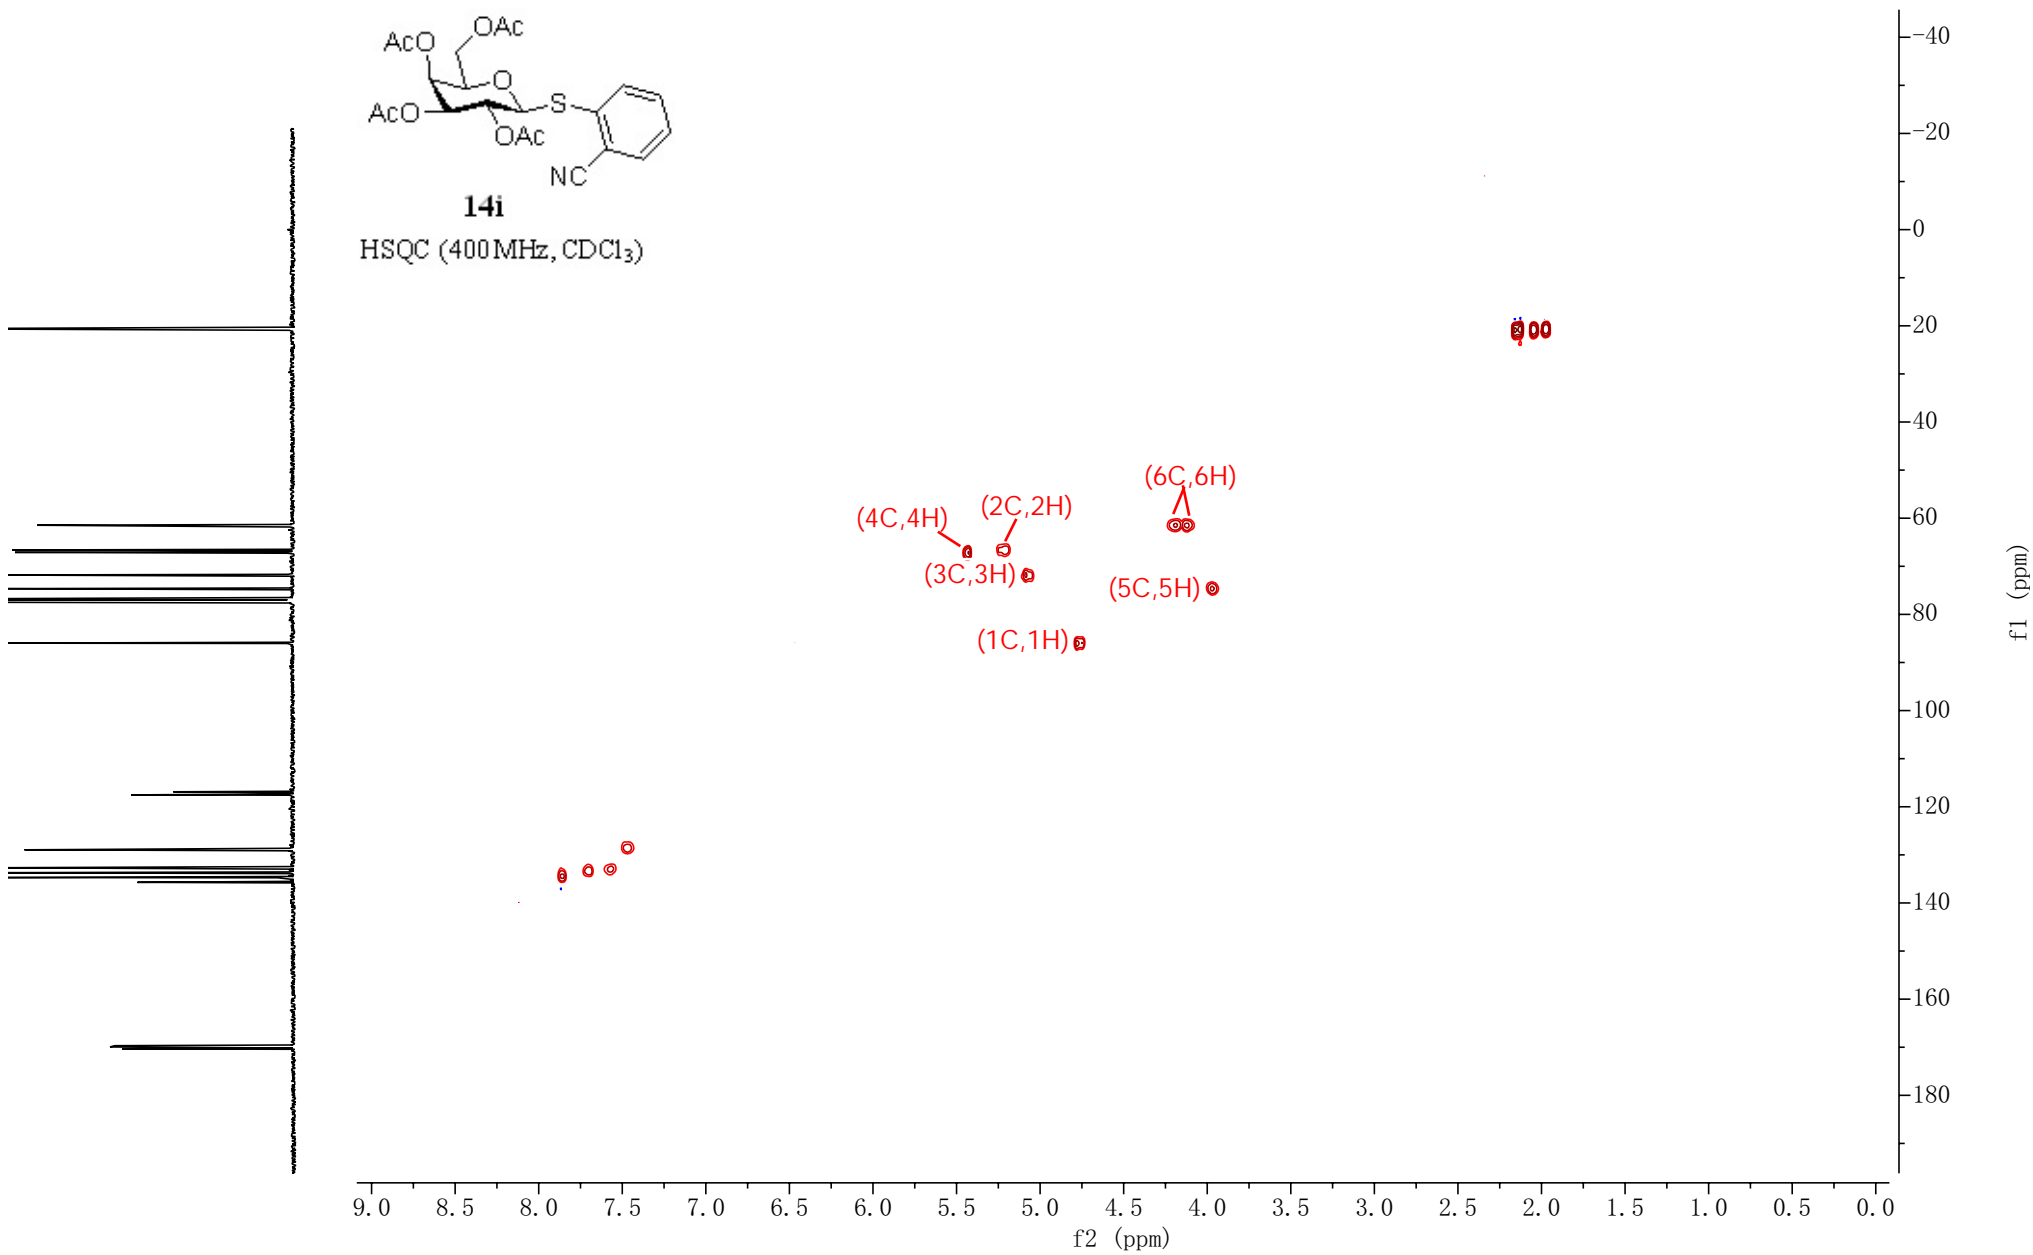



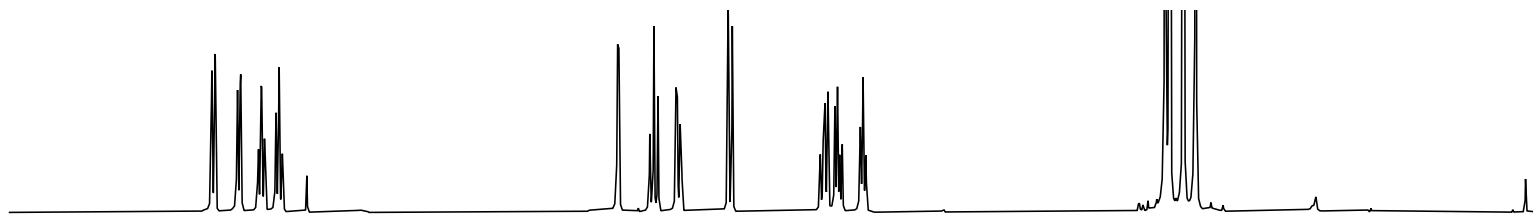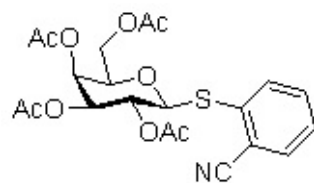

**14i**

HMBC (400 MHz, CDCl<sub>3</sub>)

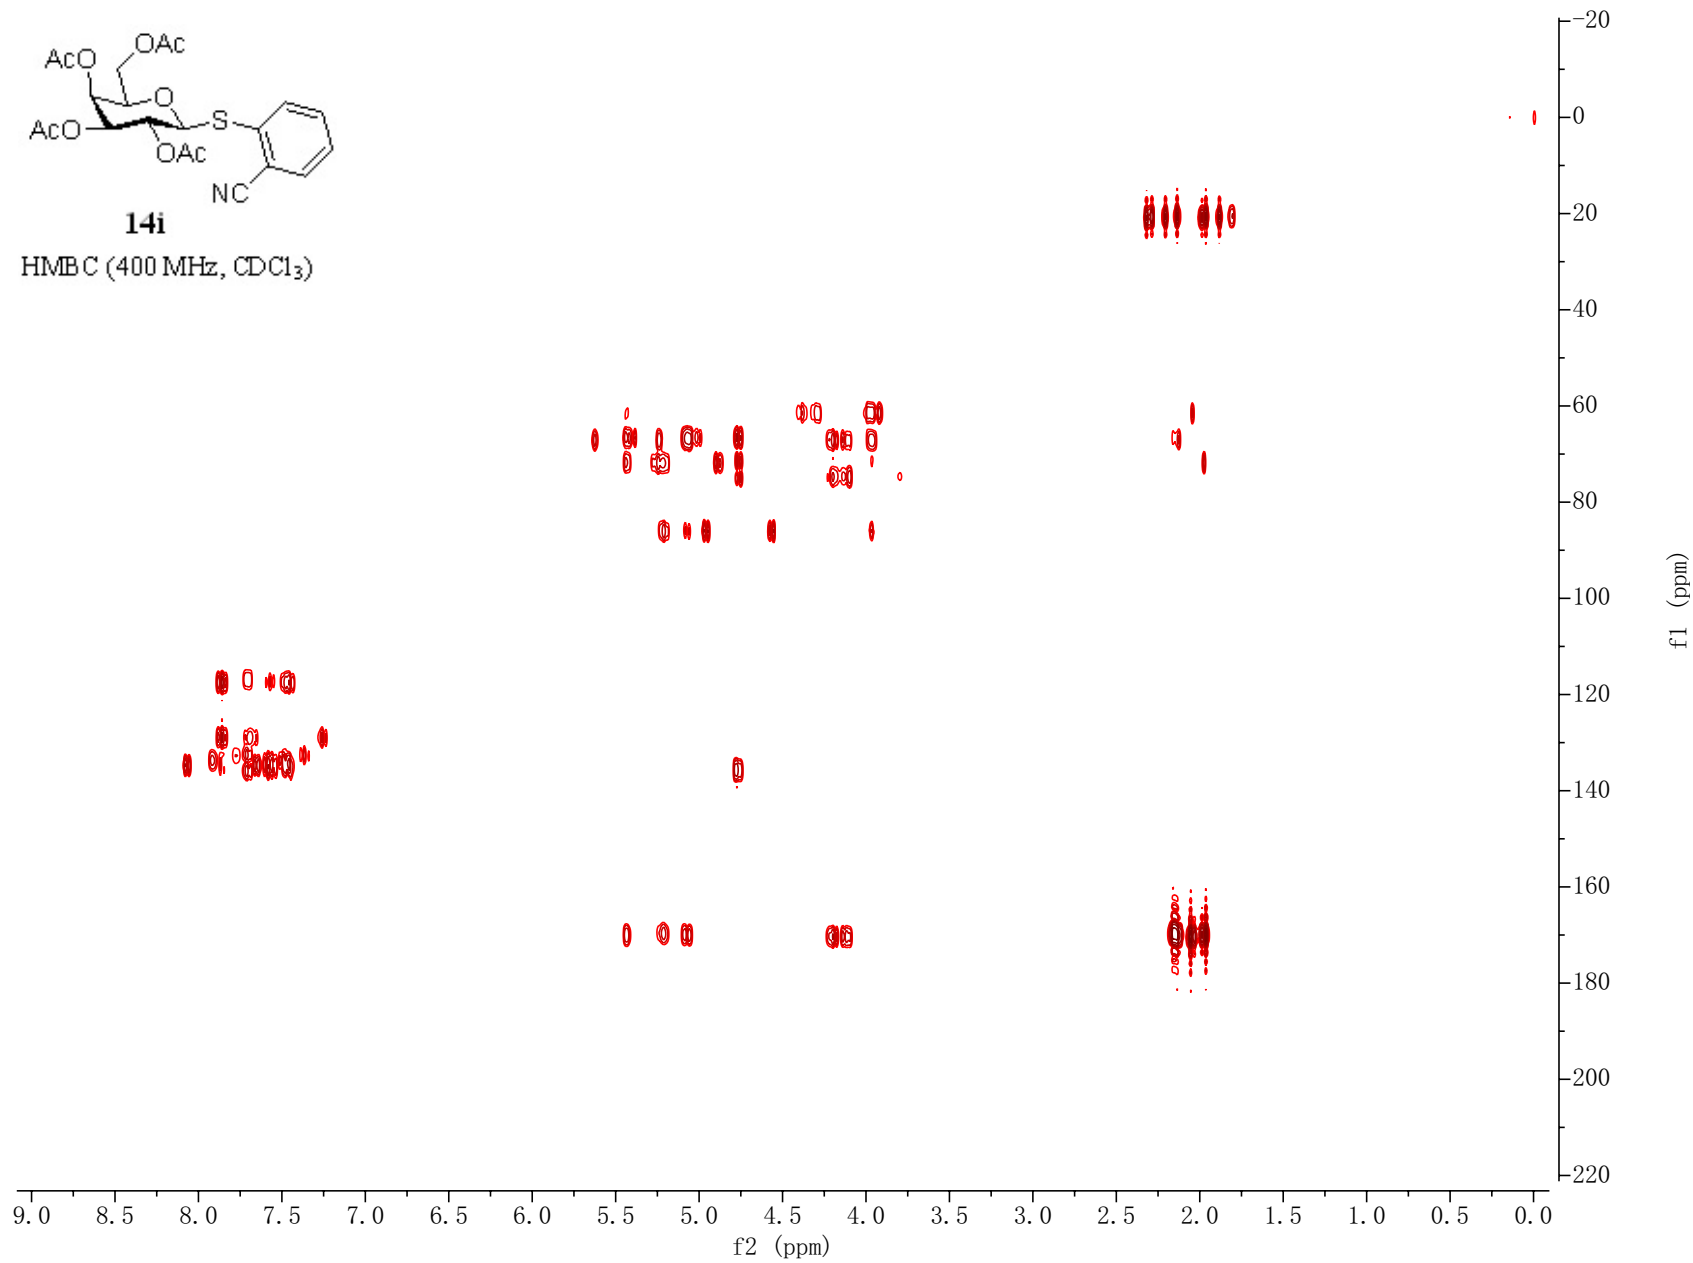

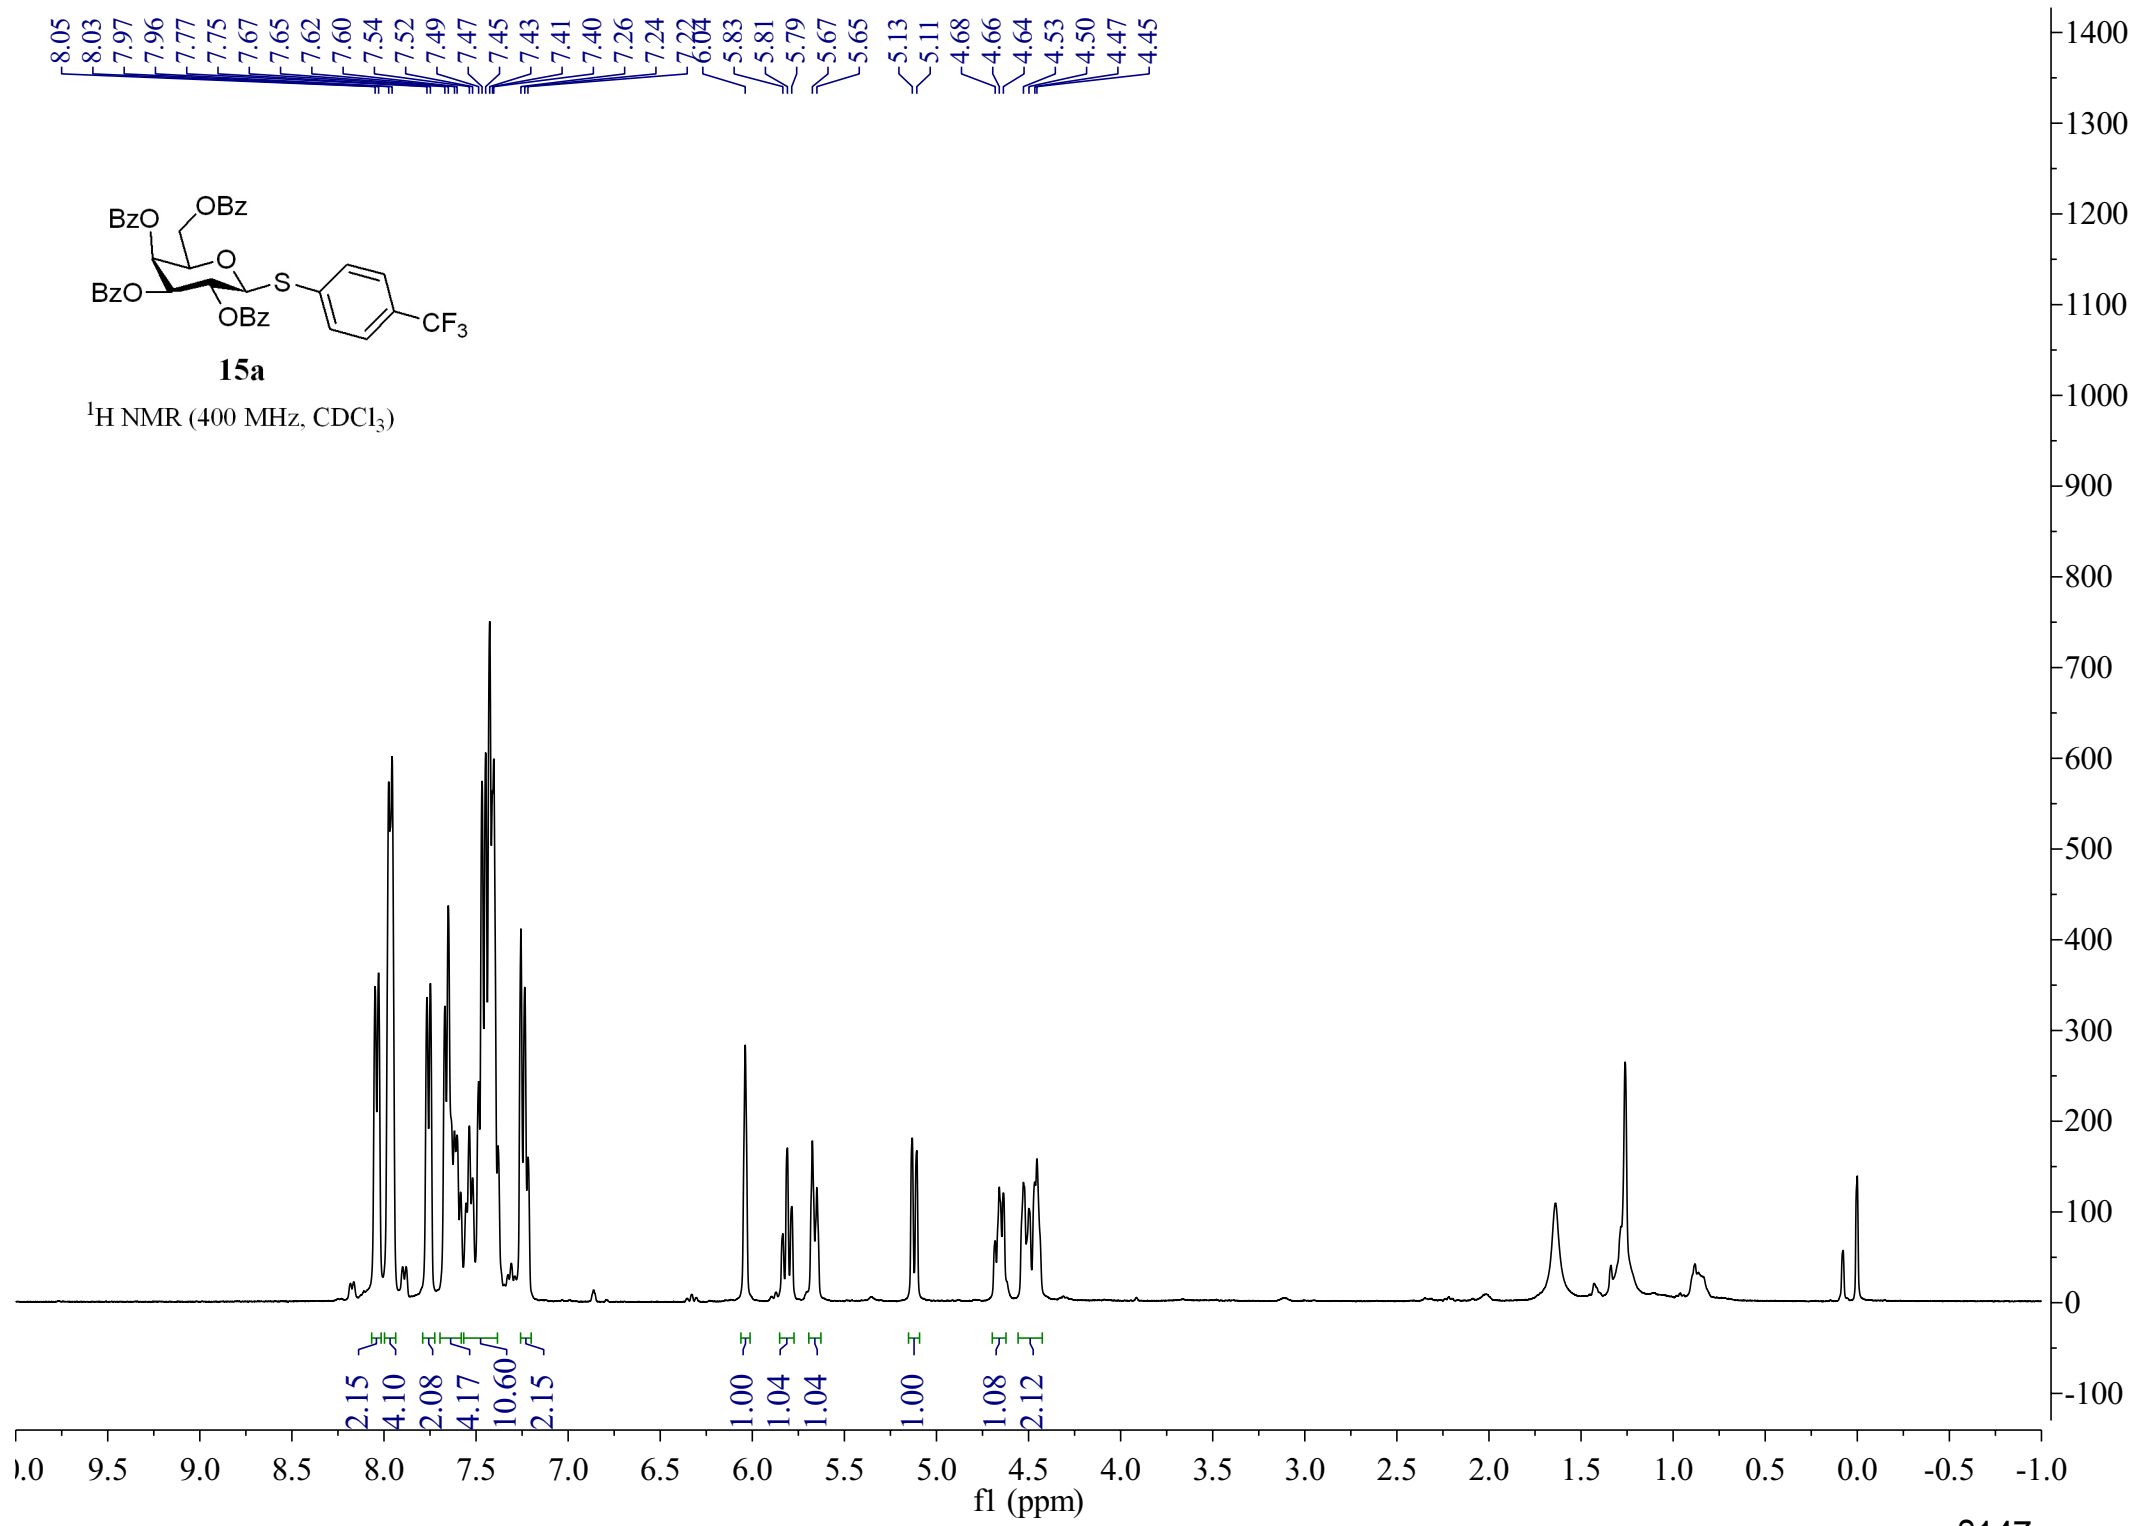

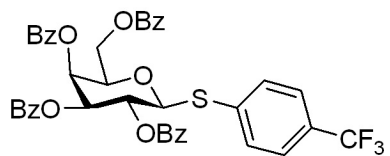

**15a**

$^{13}\text{C}\{^1\text{H}\}$  NMR (100 MHz,  $\text{CDCl}_3$ )

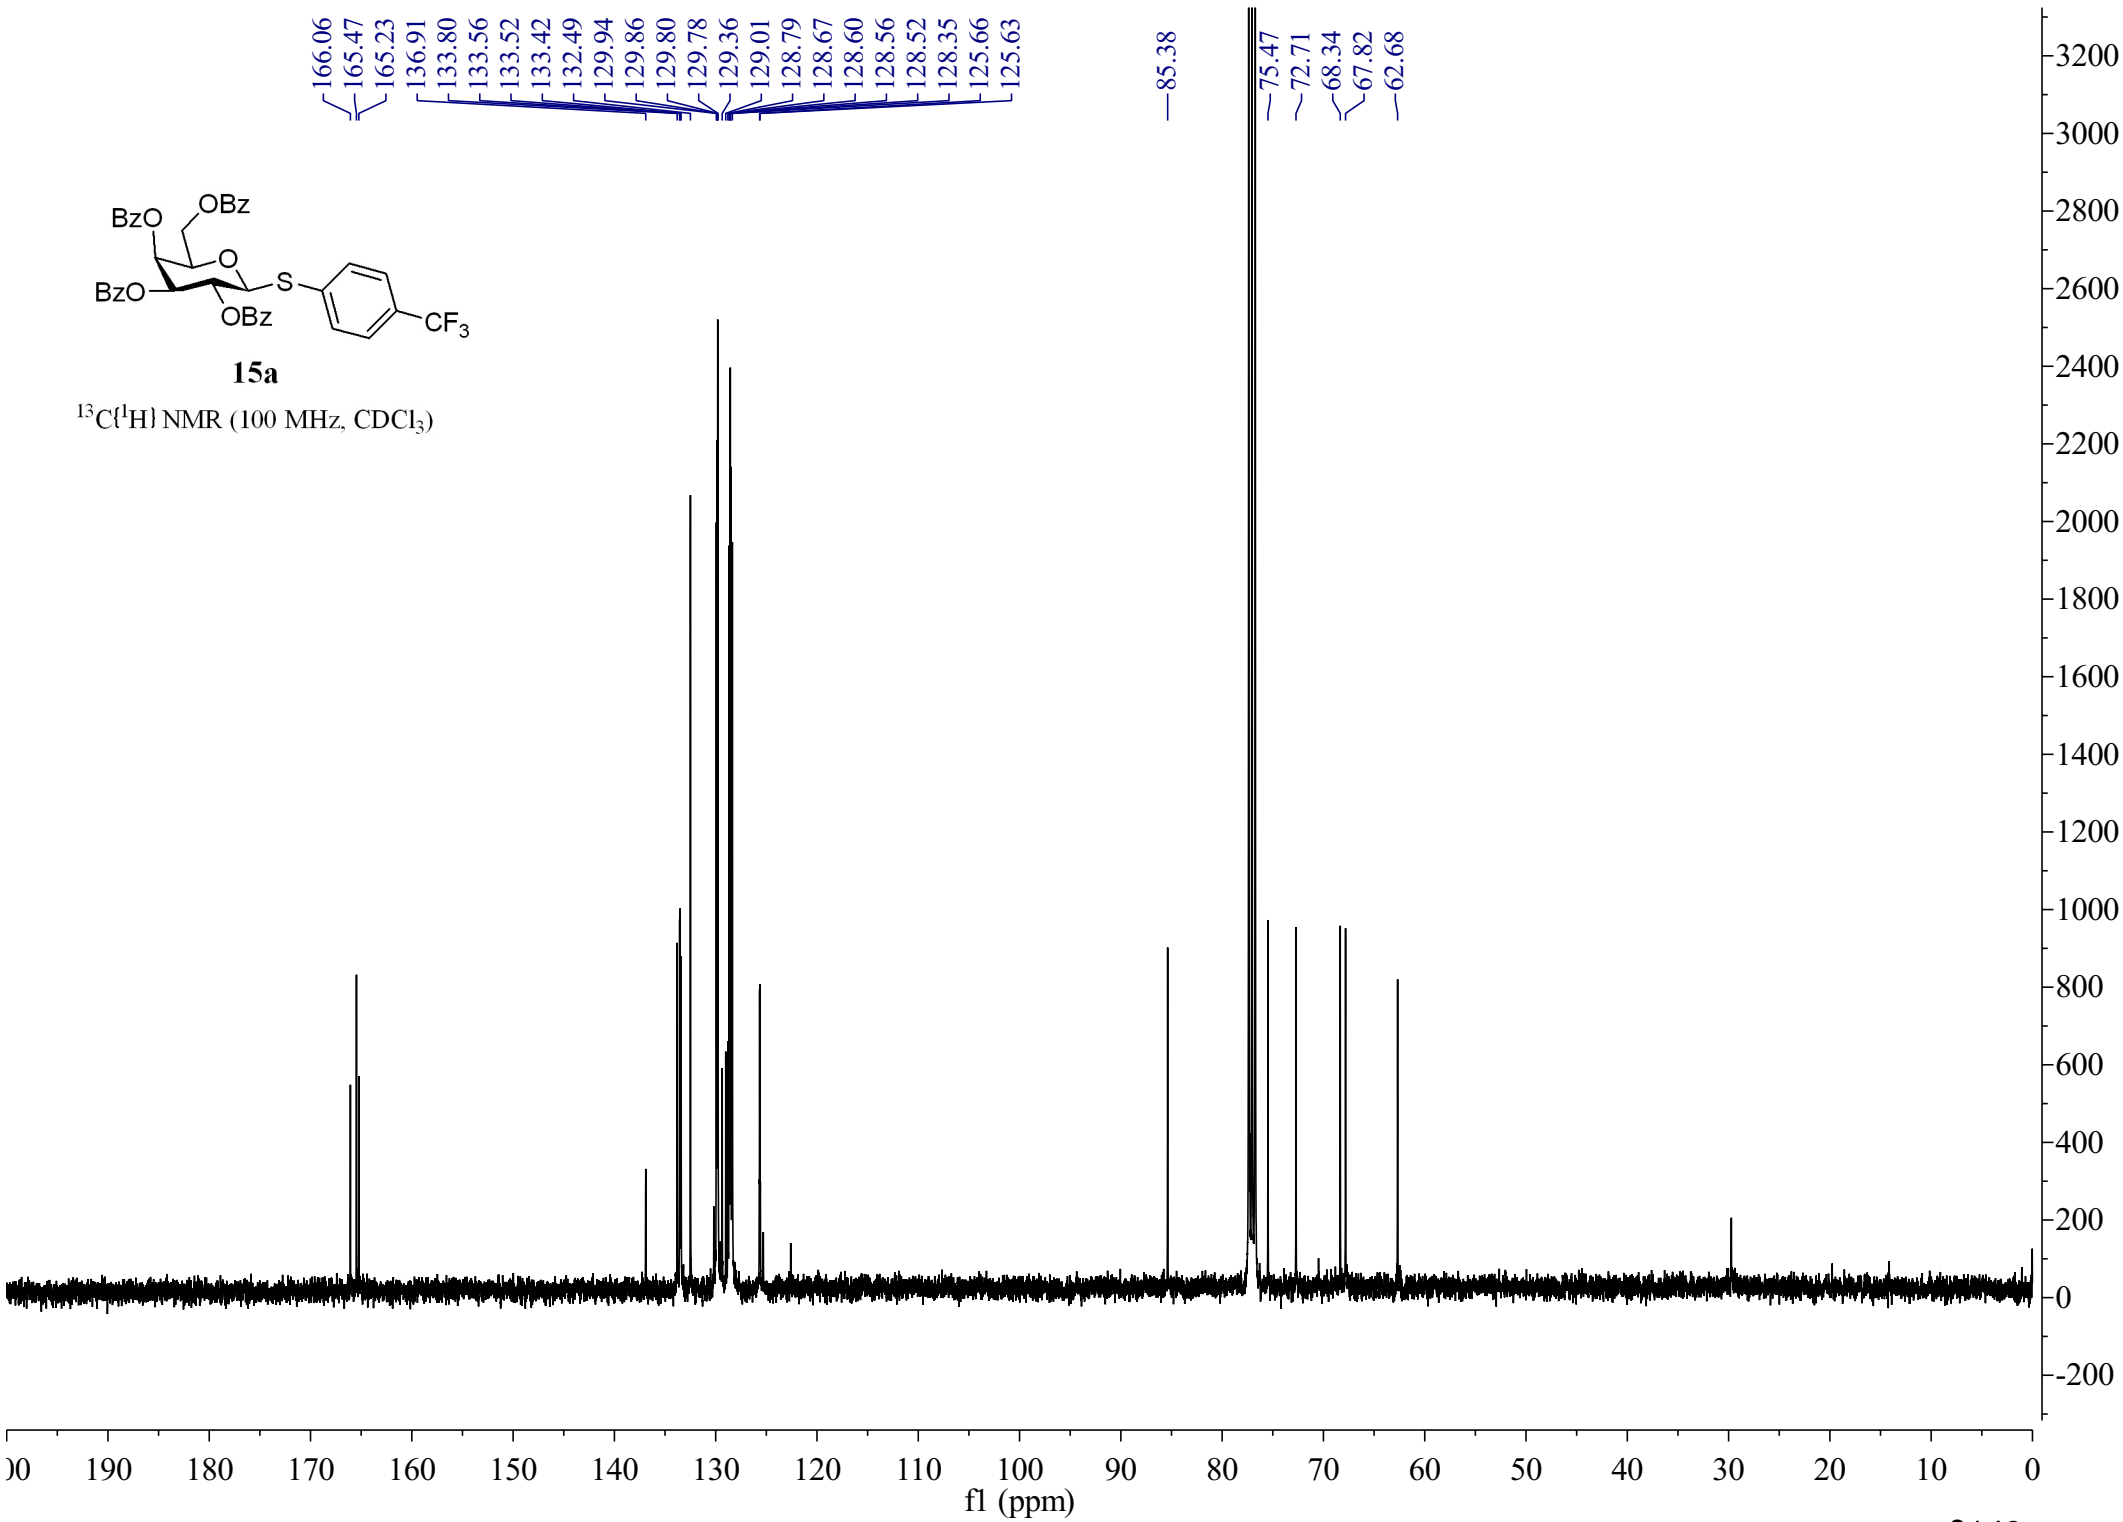

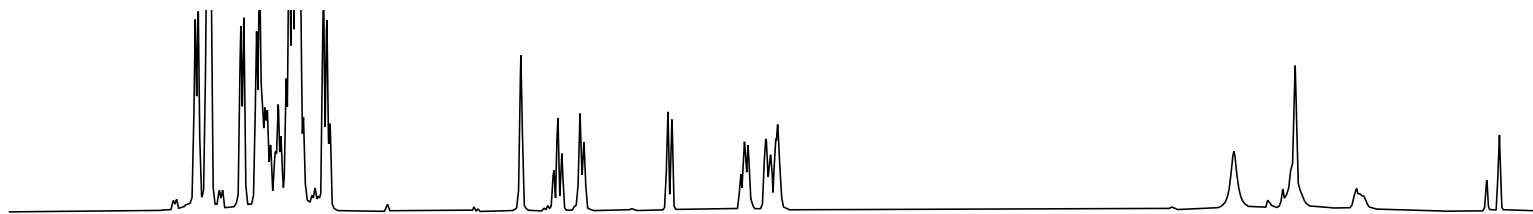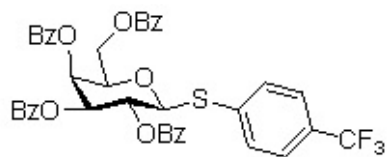

15a

<sup>1</sup>H-<sup>1</sup>H COSY (400 MHz, CDCl<sub>3</sub>)

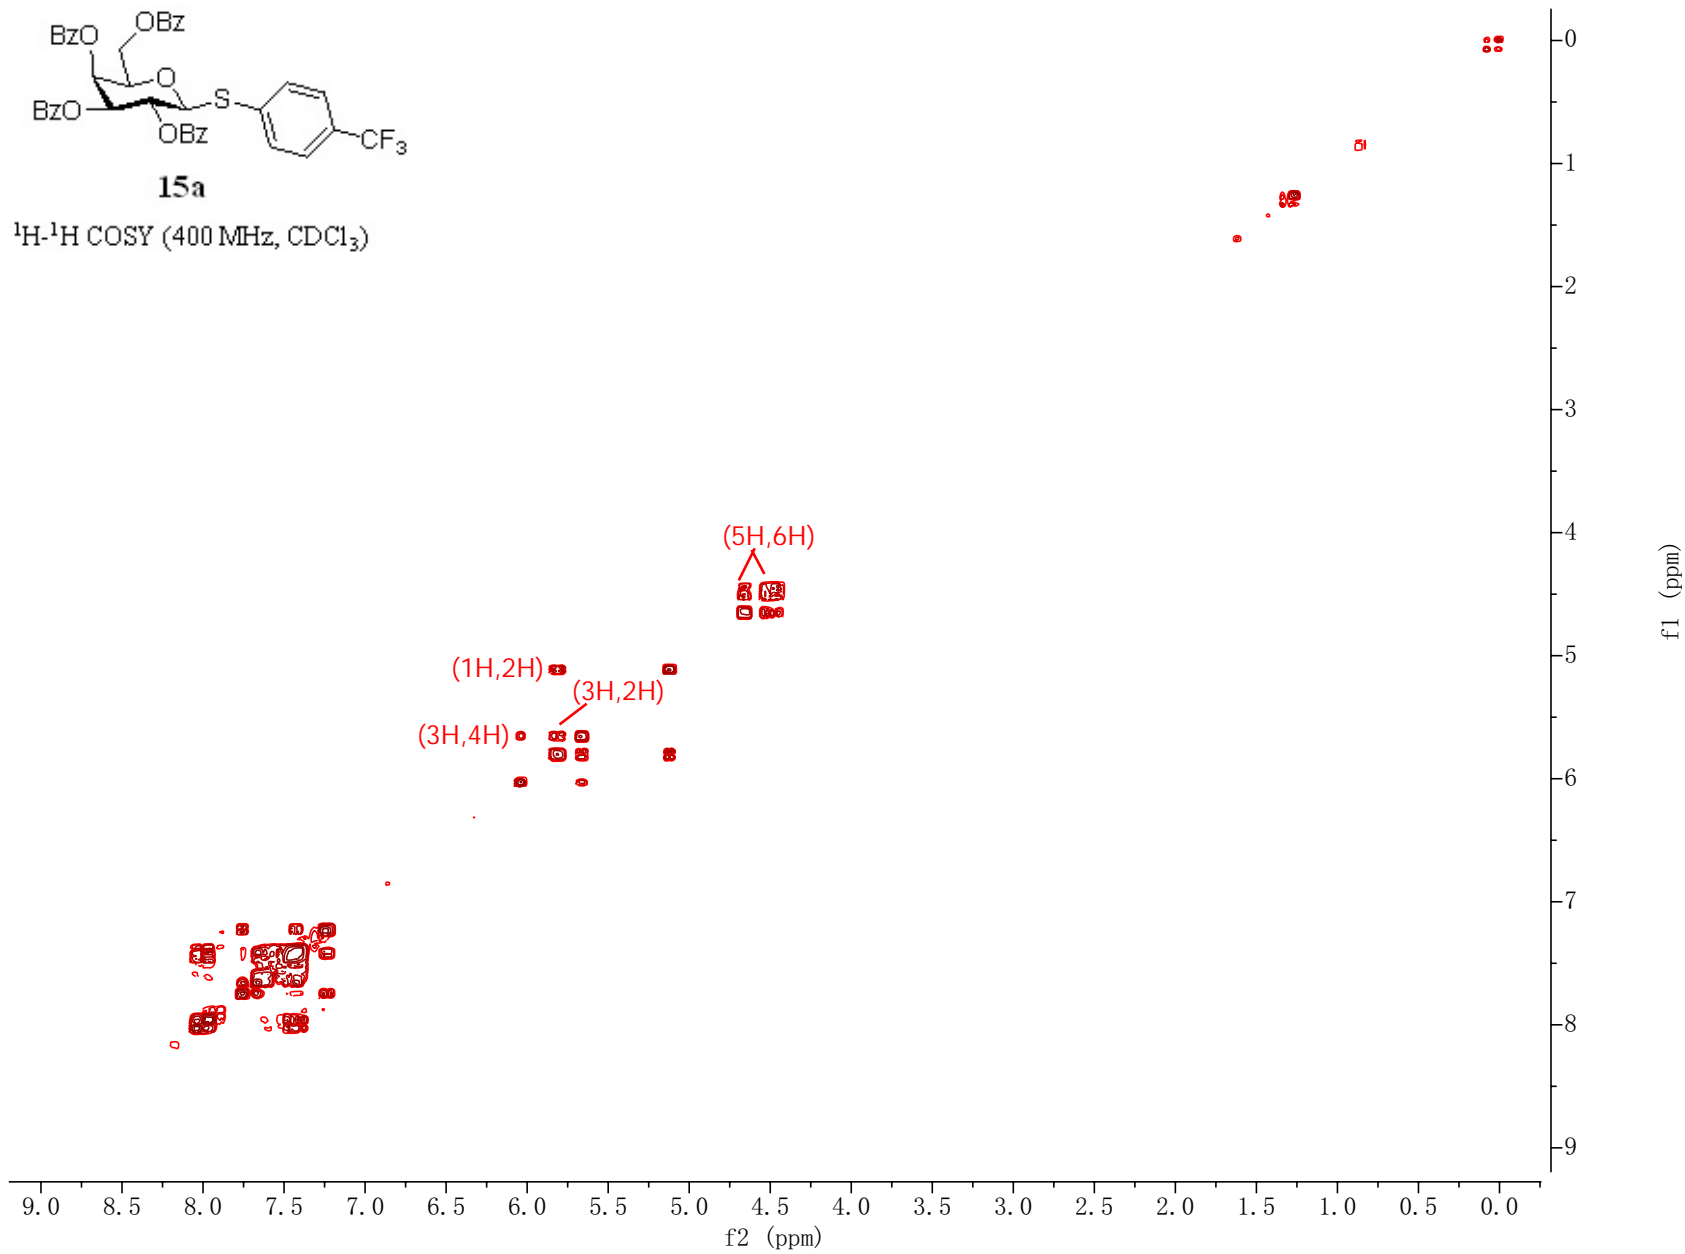

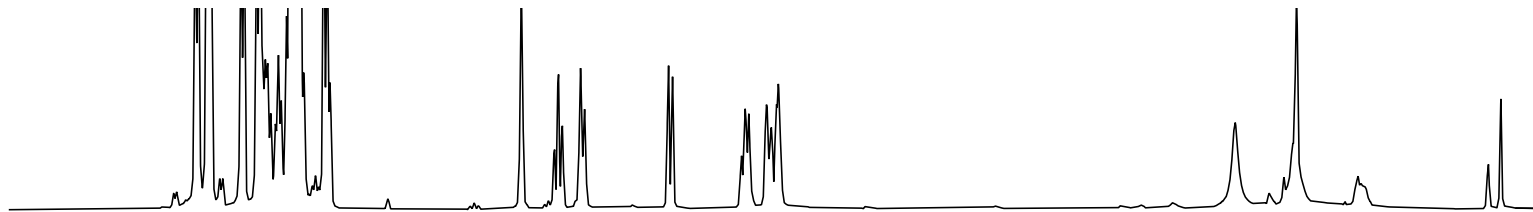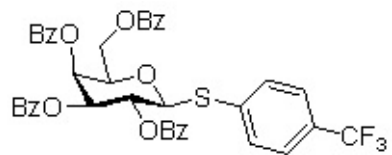

15a

HSQC (400 MHz, CDCl<sub>3</sub>)

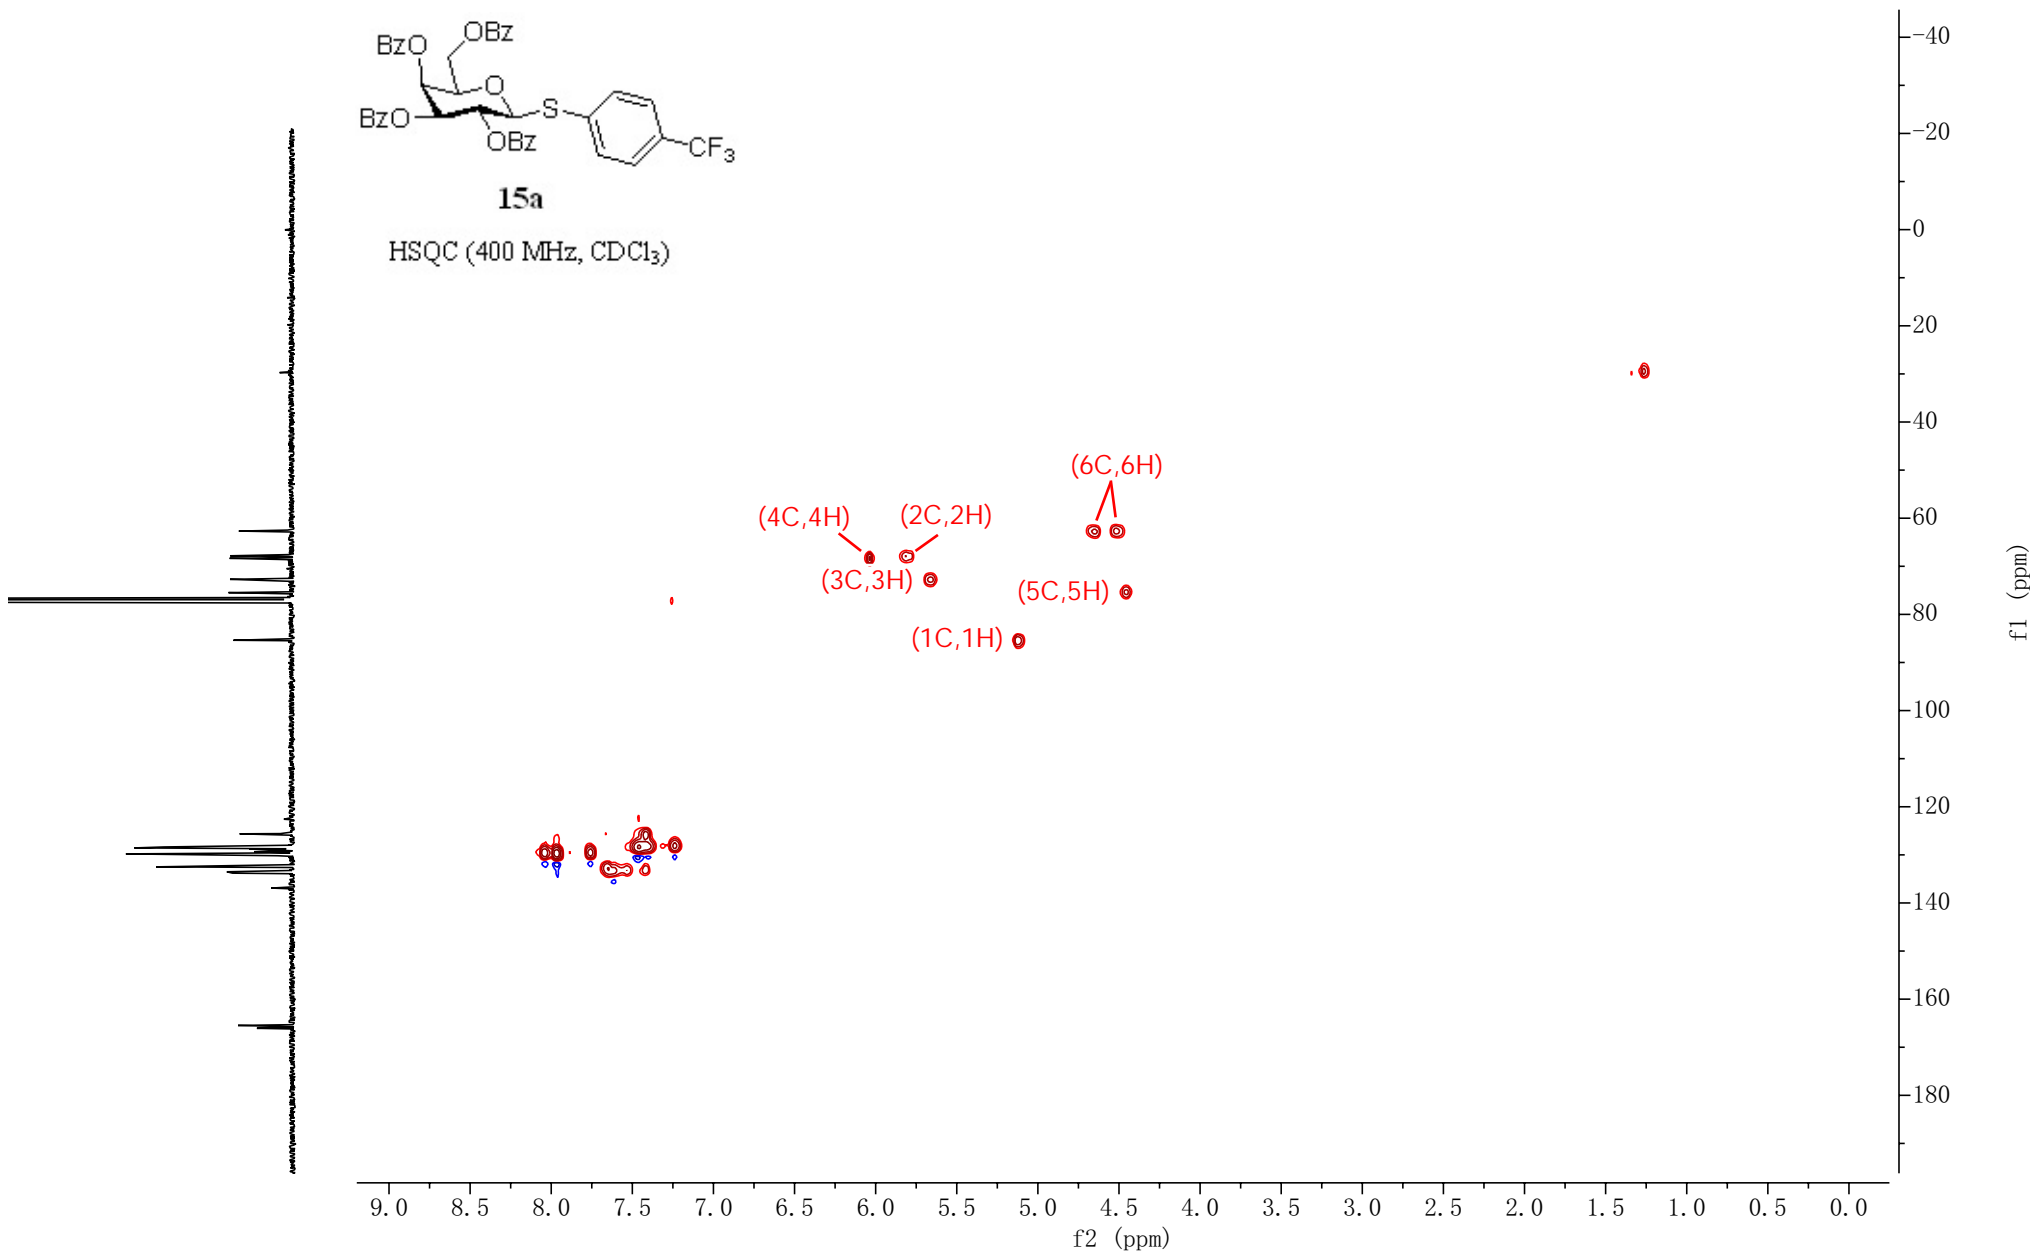

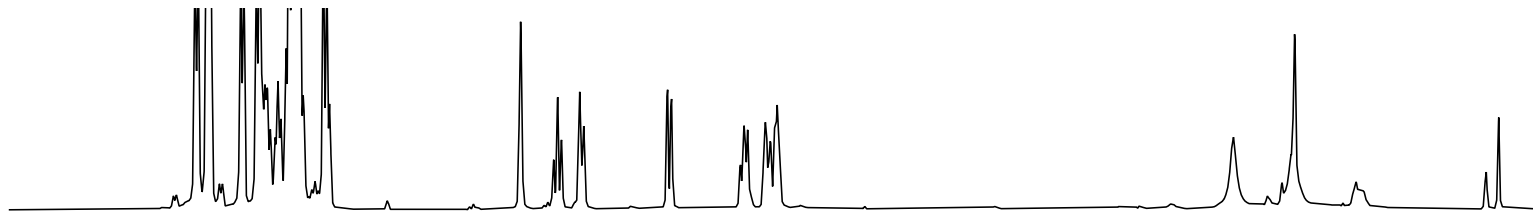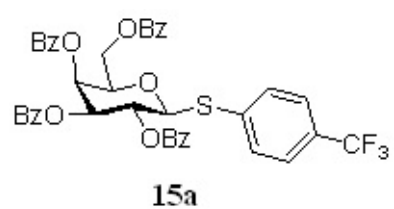

HMBC (400 MHz, CDCl<sub>3</sub>)

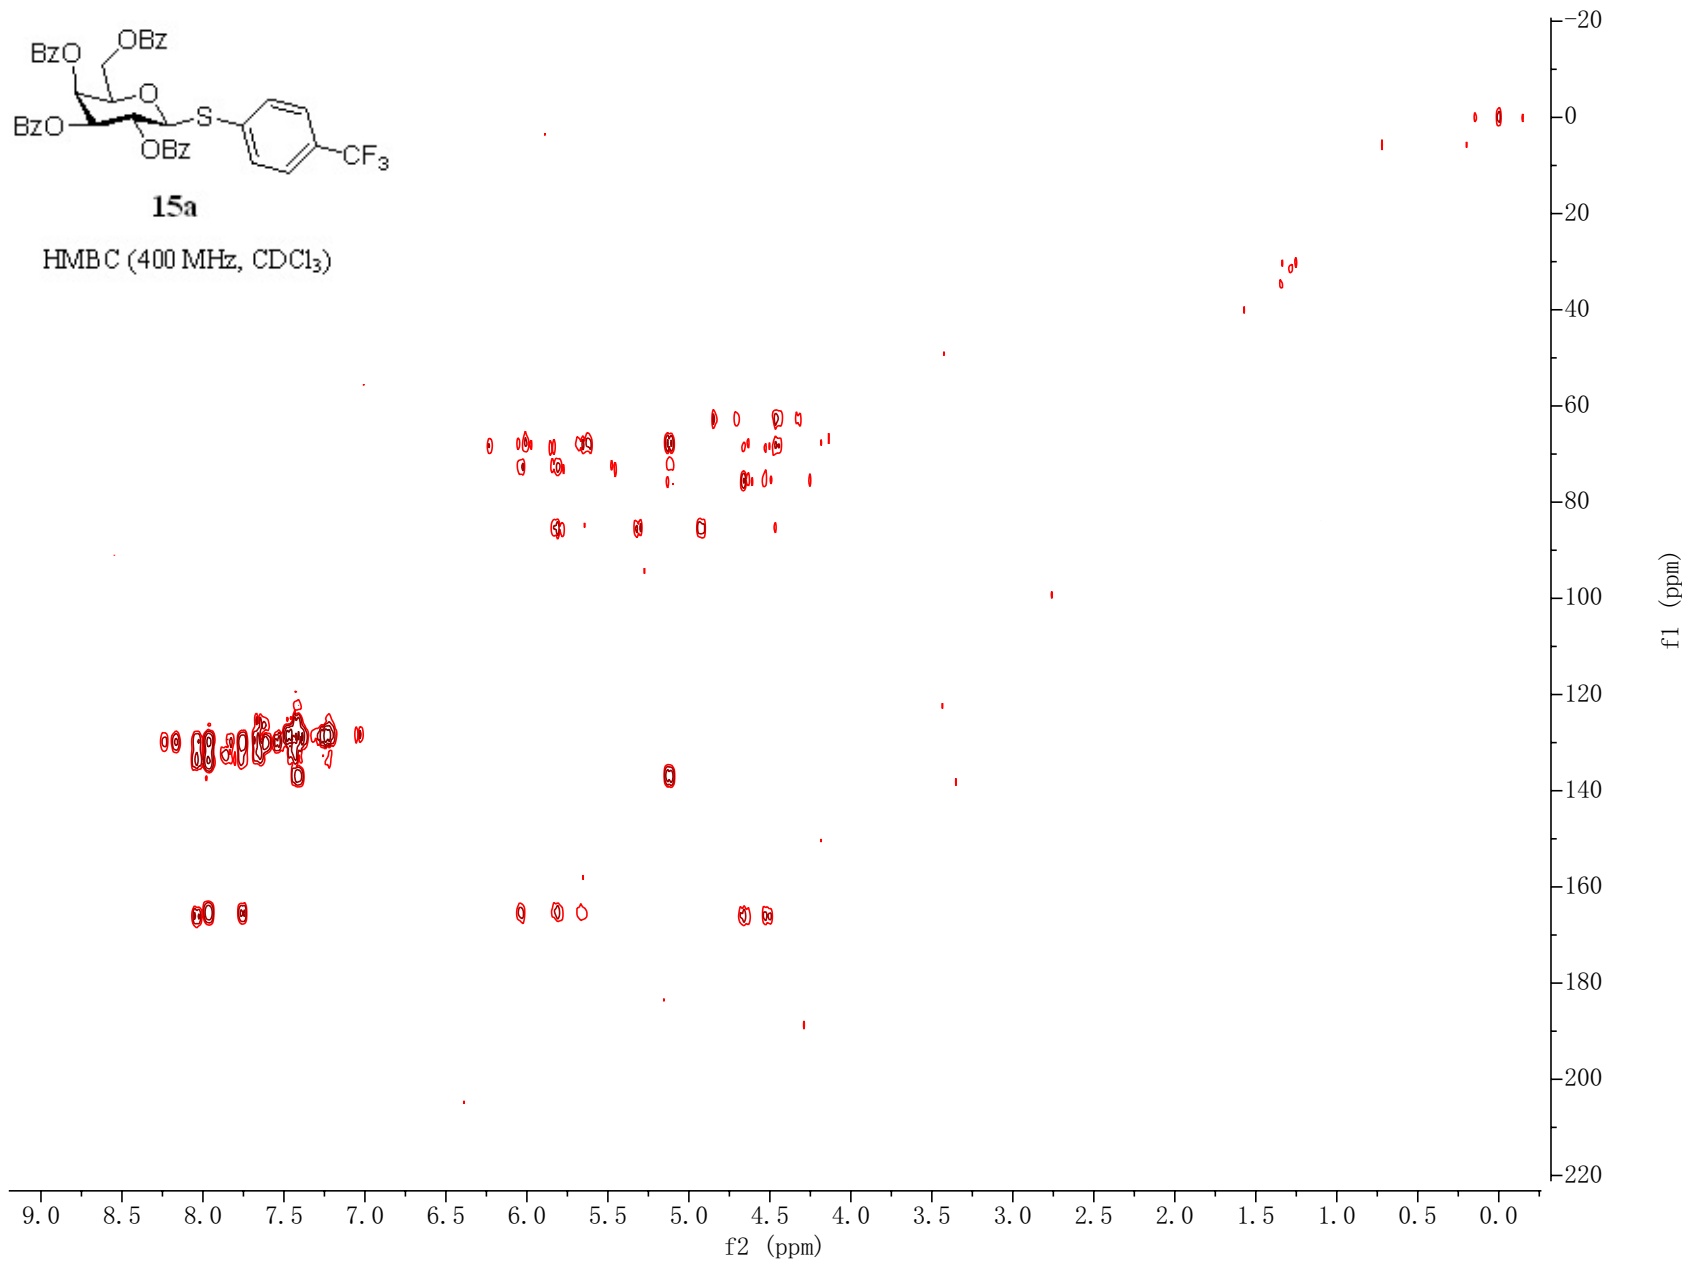

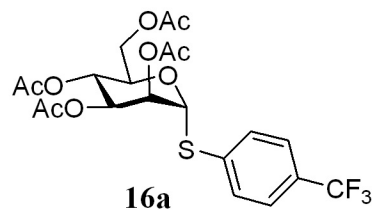

<sup>1</sup>H NMR (400 MHz, CDCl<sub>3</sub>)

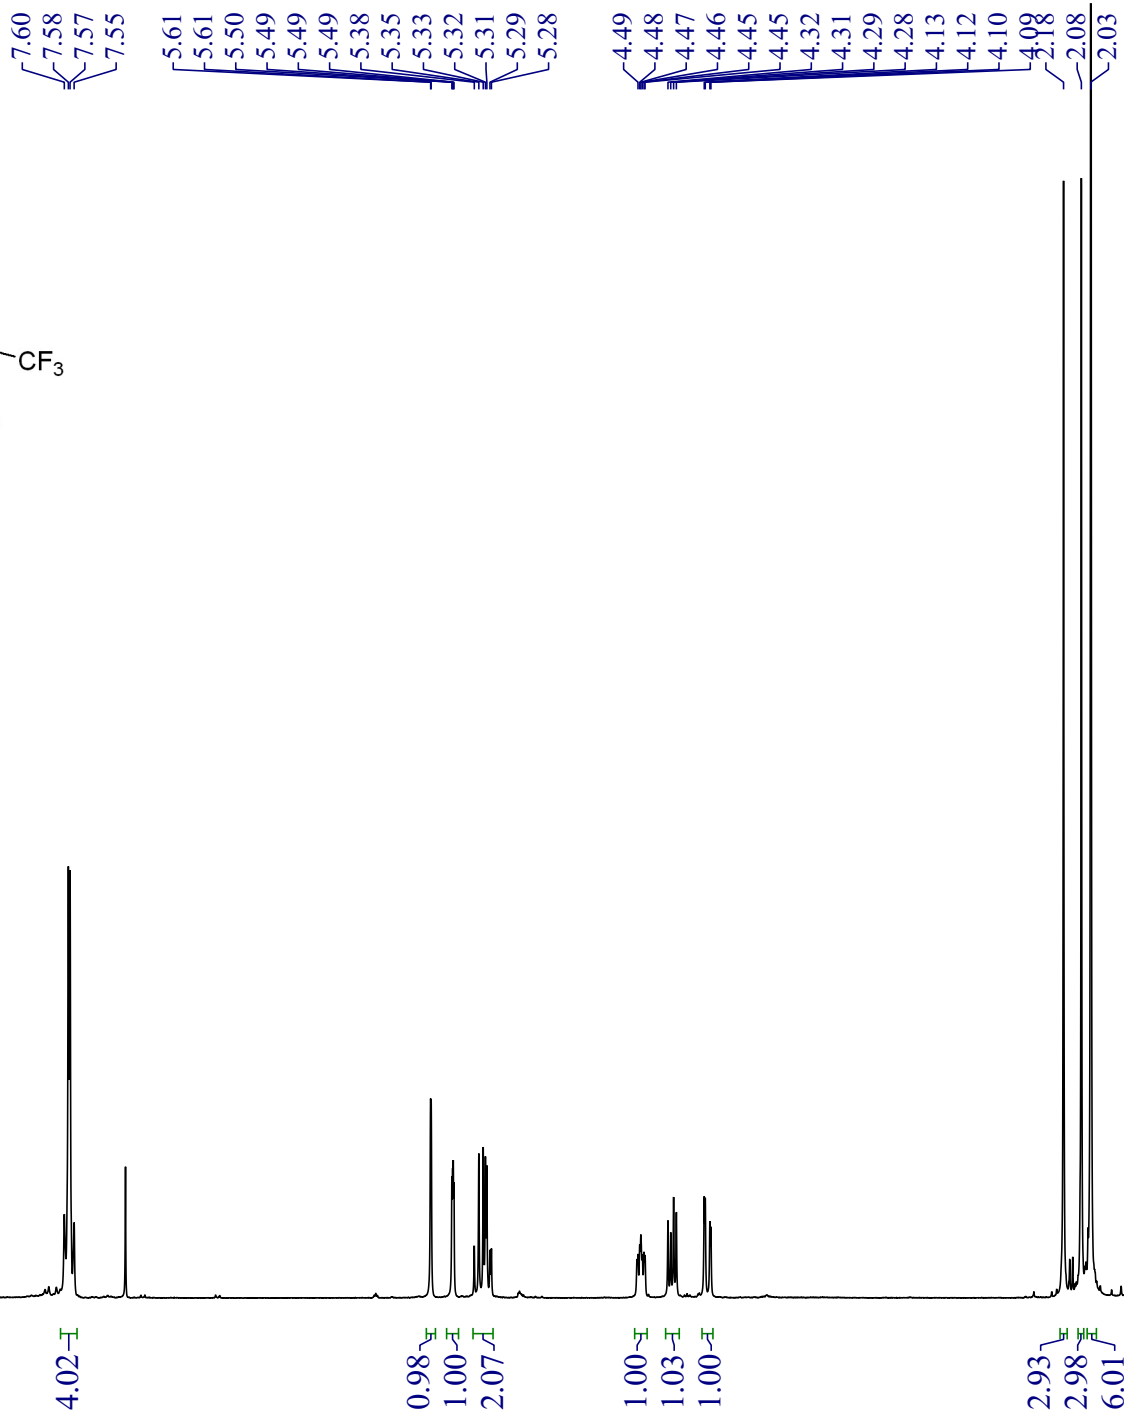

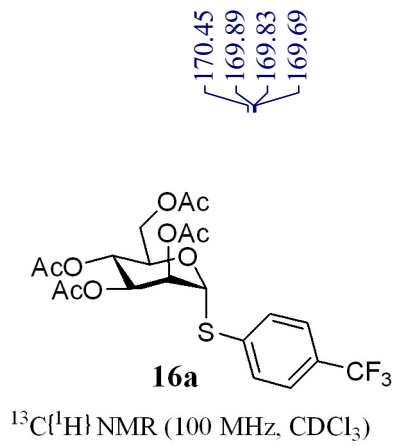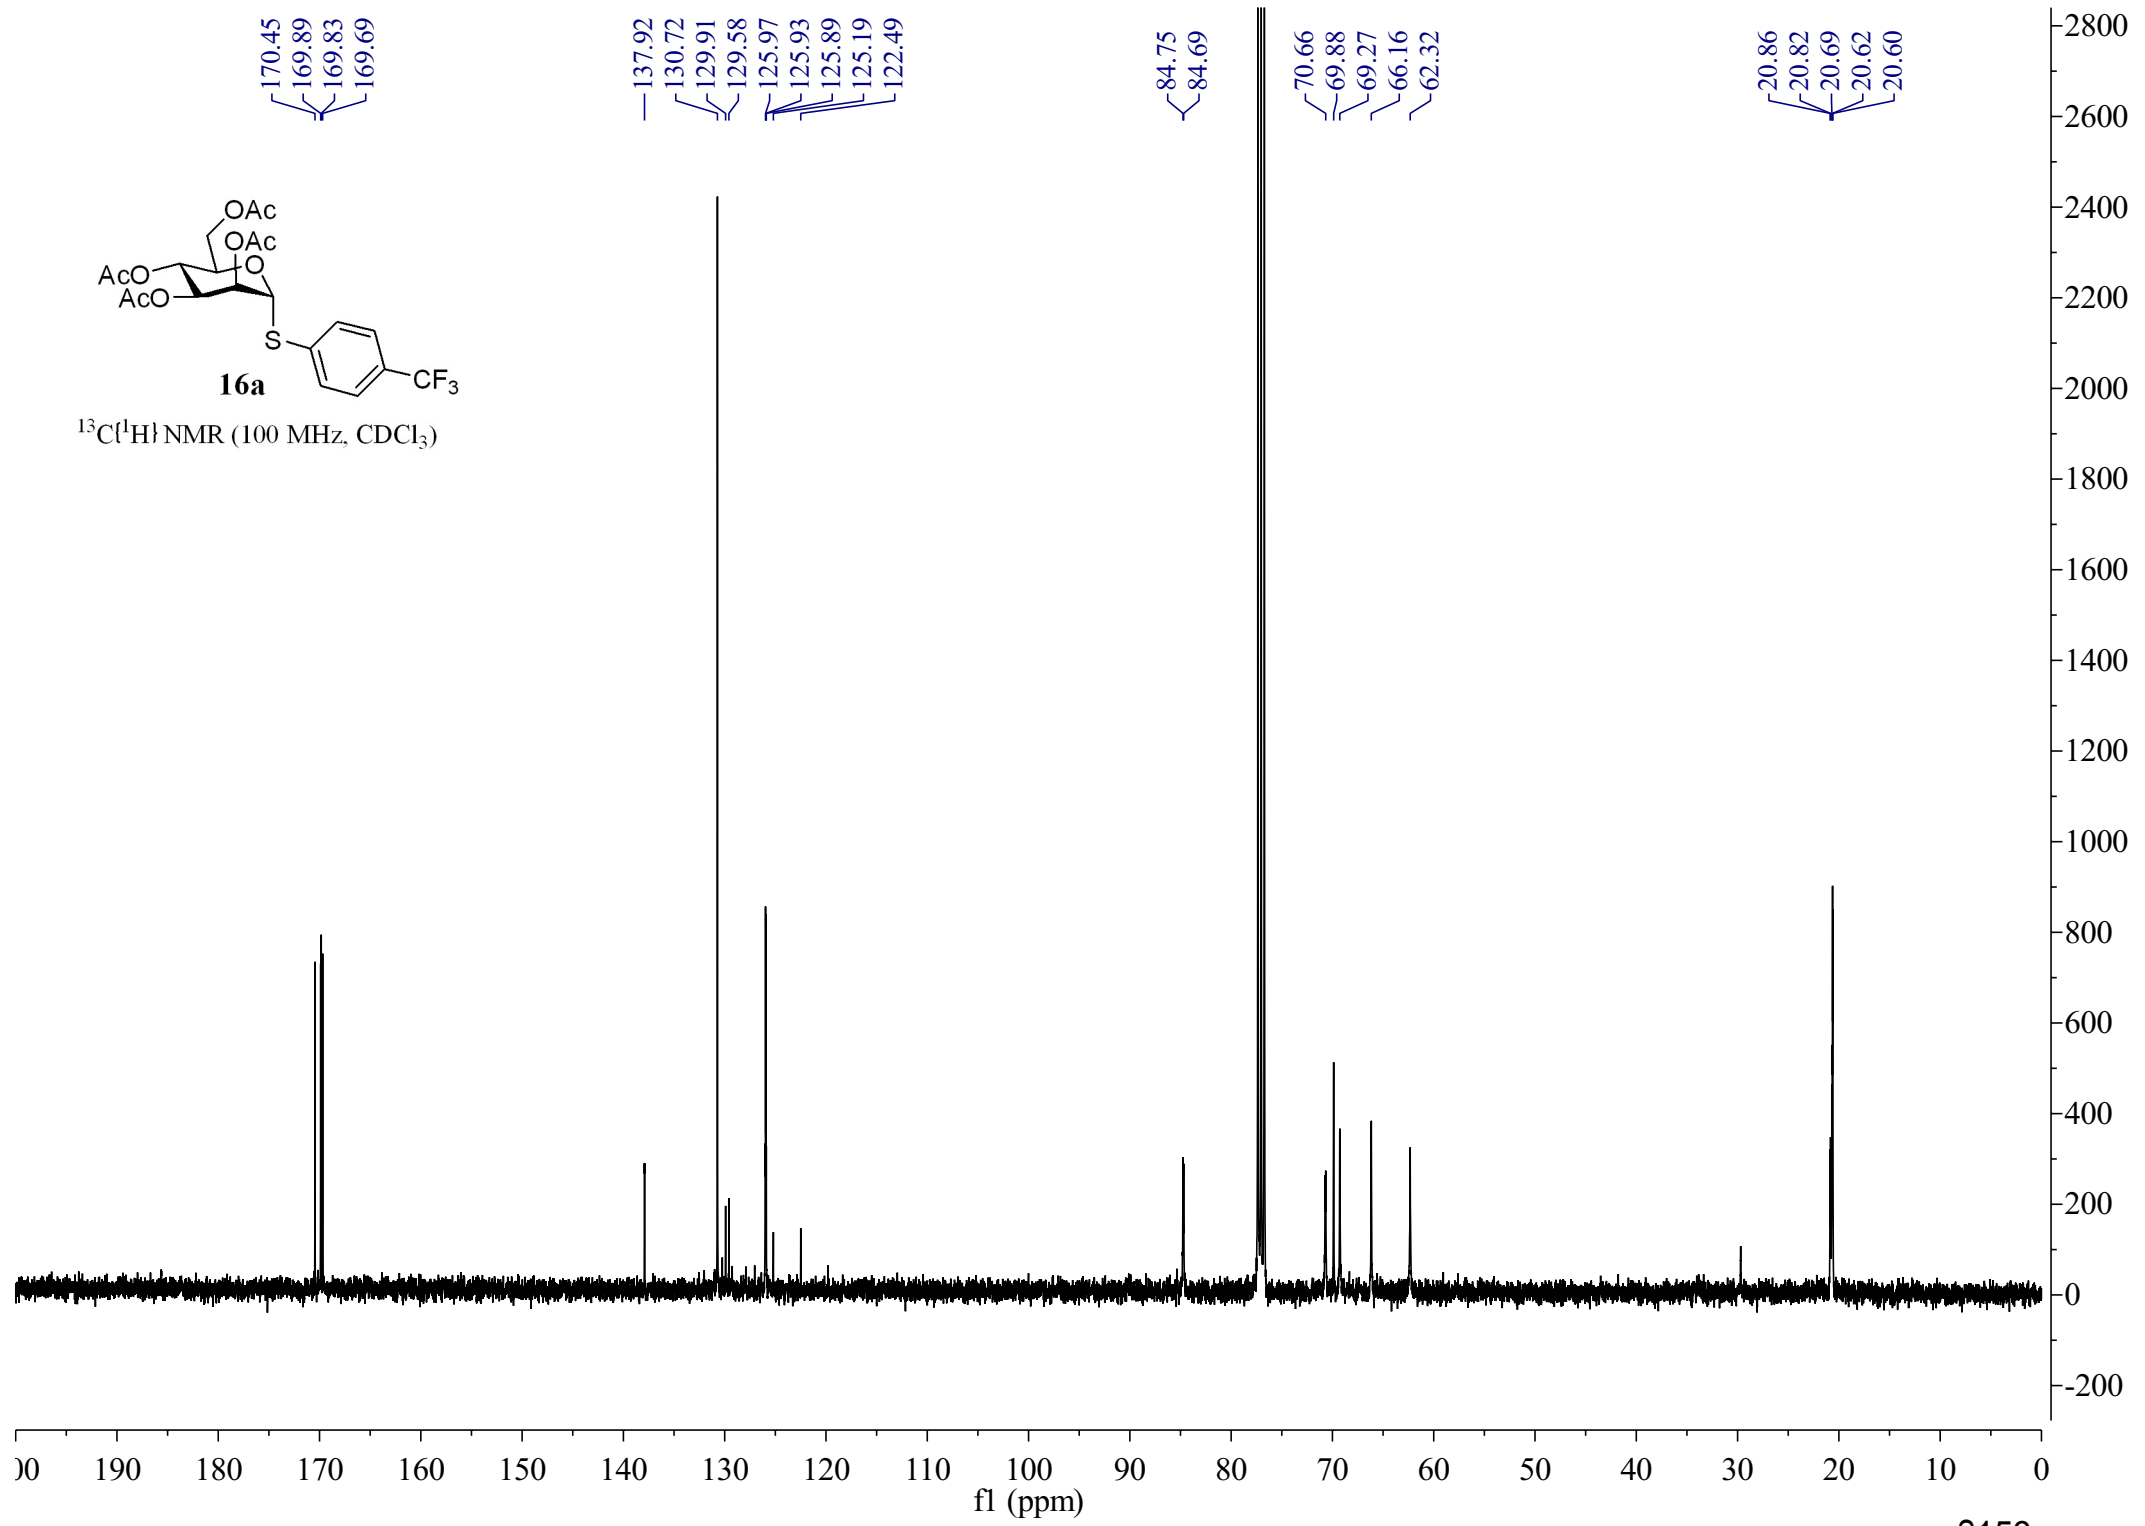



7.76  
7.74  
7.71  
7.71  
7.69  
7.69  
7.60  
7.60  
7.58  
7.58  
7.56  
7.56  
7.46  
7.46  
7.44  
7.44  
7.42  
7.42

5.57  
5.55  
5.55  
5.54  
5.54  
5.38  
5.36  
5.33  
5.32

4.59  
4.59  
4.58  
4.57  
4.57  
4.56  
4.36  
4.36  
4.35  
4.33  
4.32  
4.14  
4.13  
4.11  
4.11  
4.19  
2.08  
2.04  
2.03

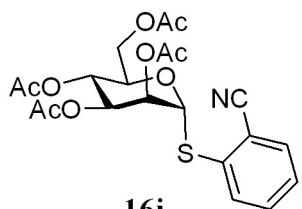

<sup>1</sup>H NMR (400 MHz, CDCl<sub>3</sub>)

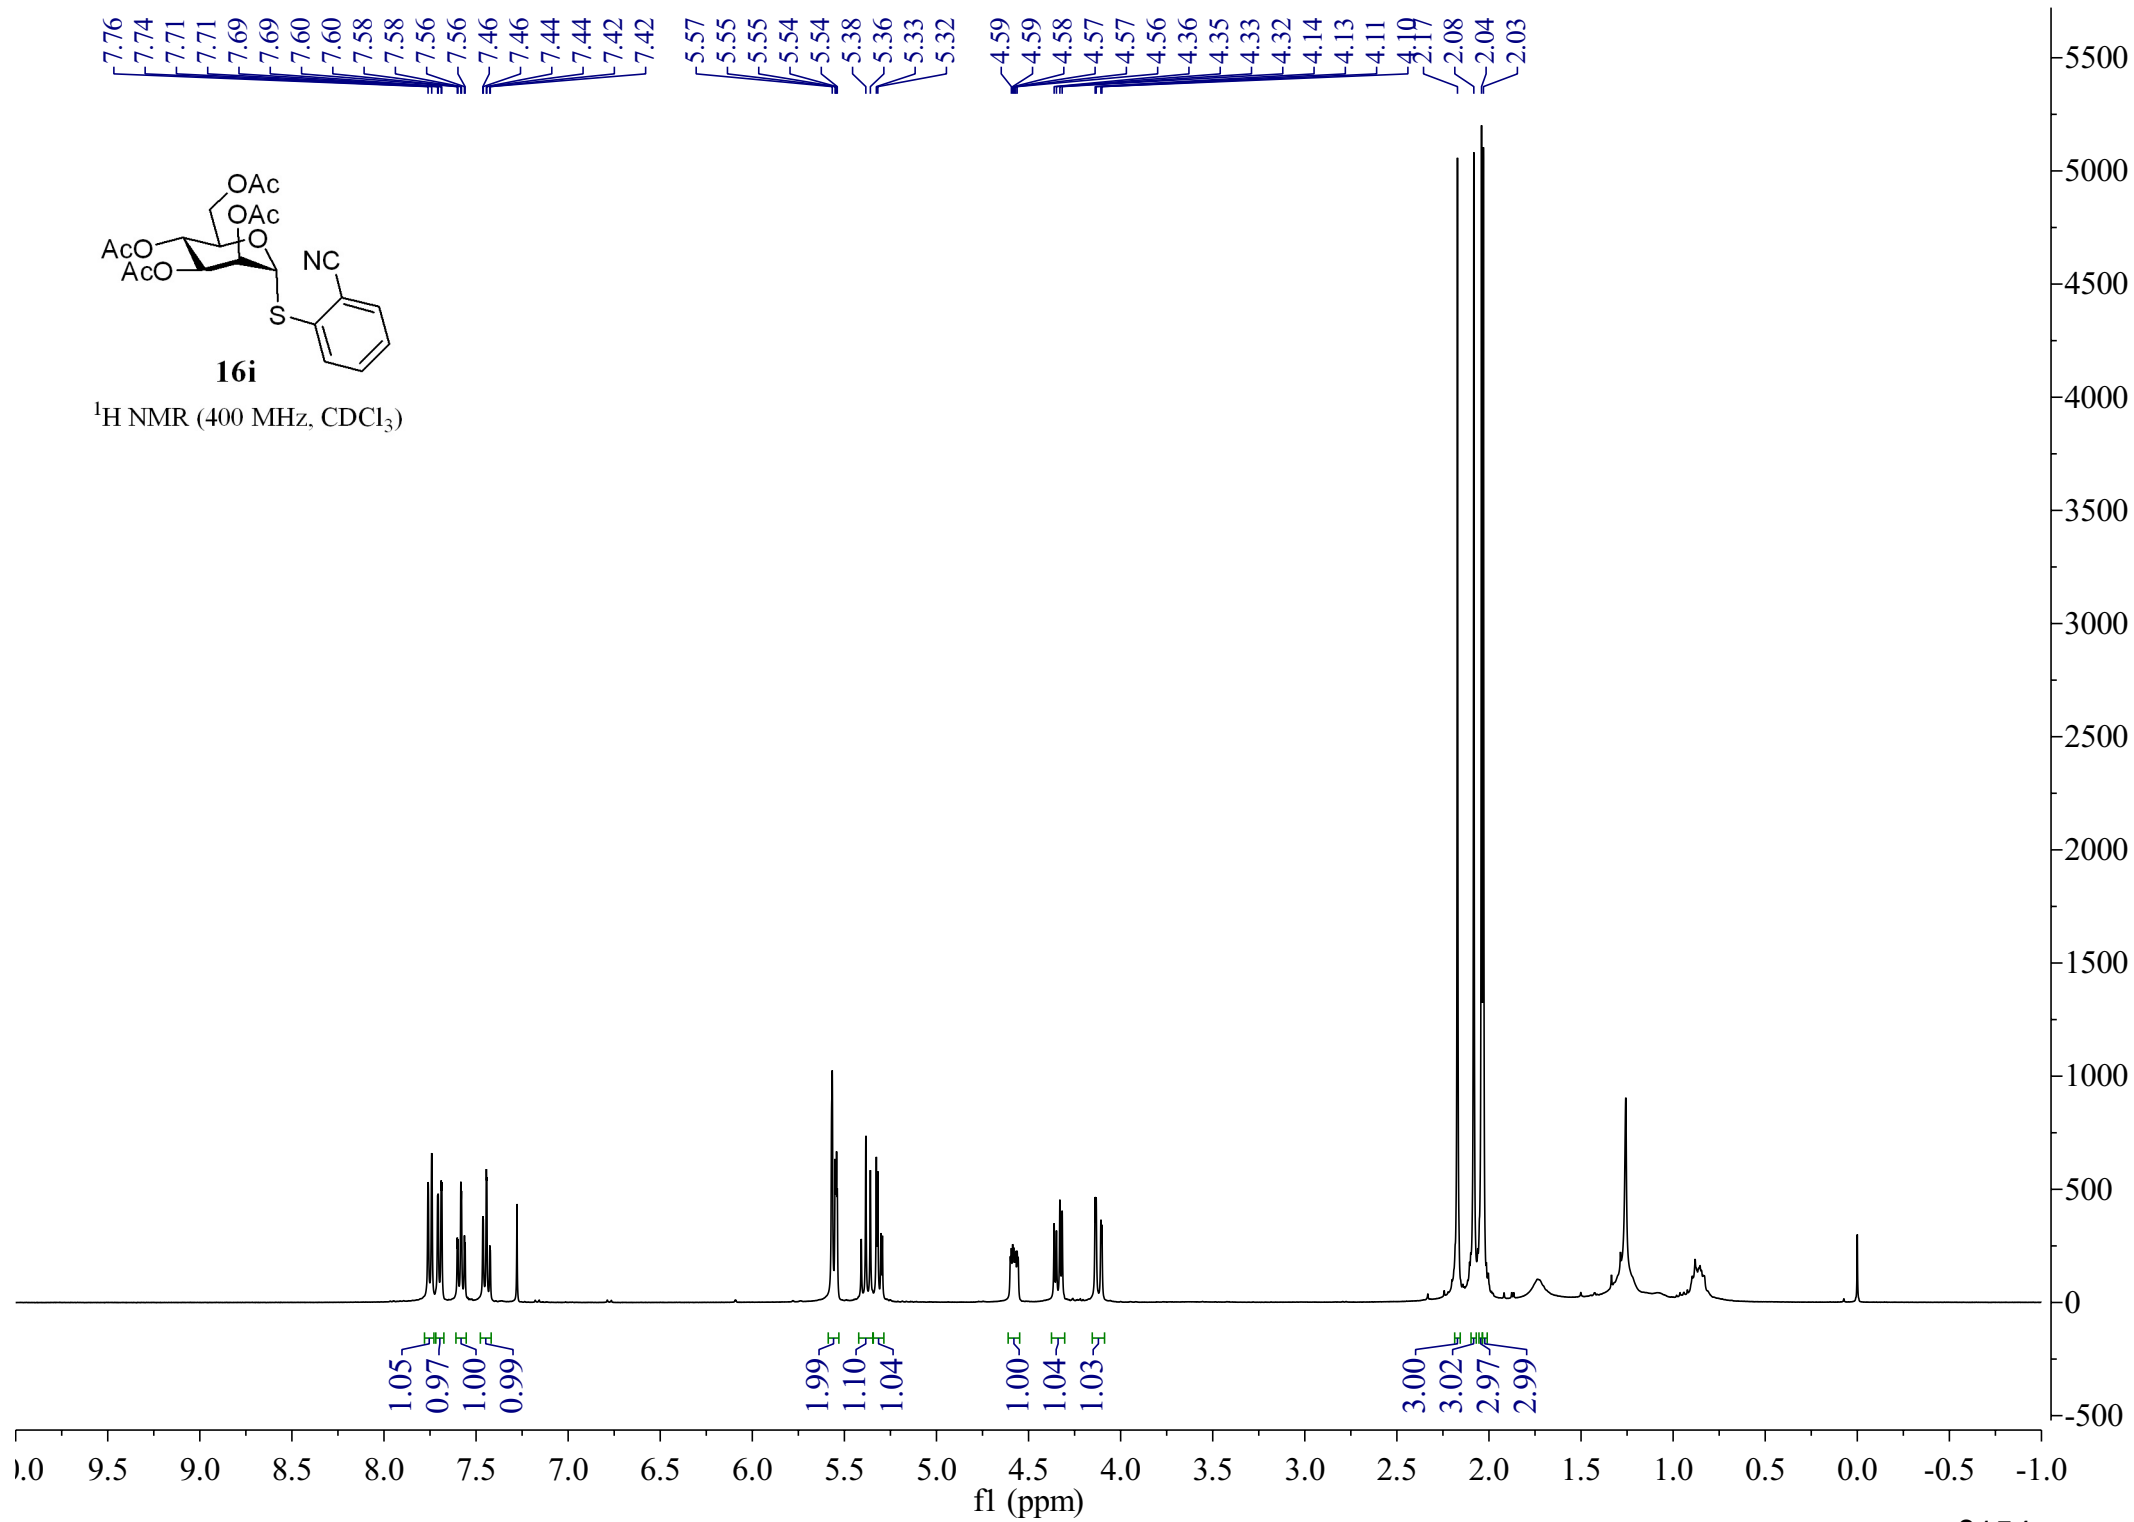

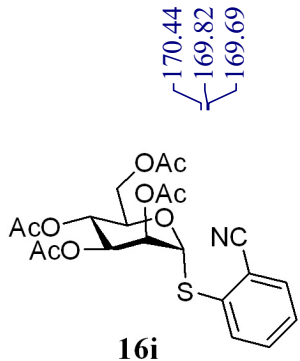

$^{13}\text{C}\{^1\text{H}\}$  NMR (100 MHz,  $\text{CDCl}_3$ )

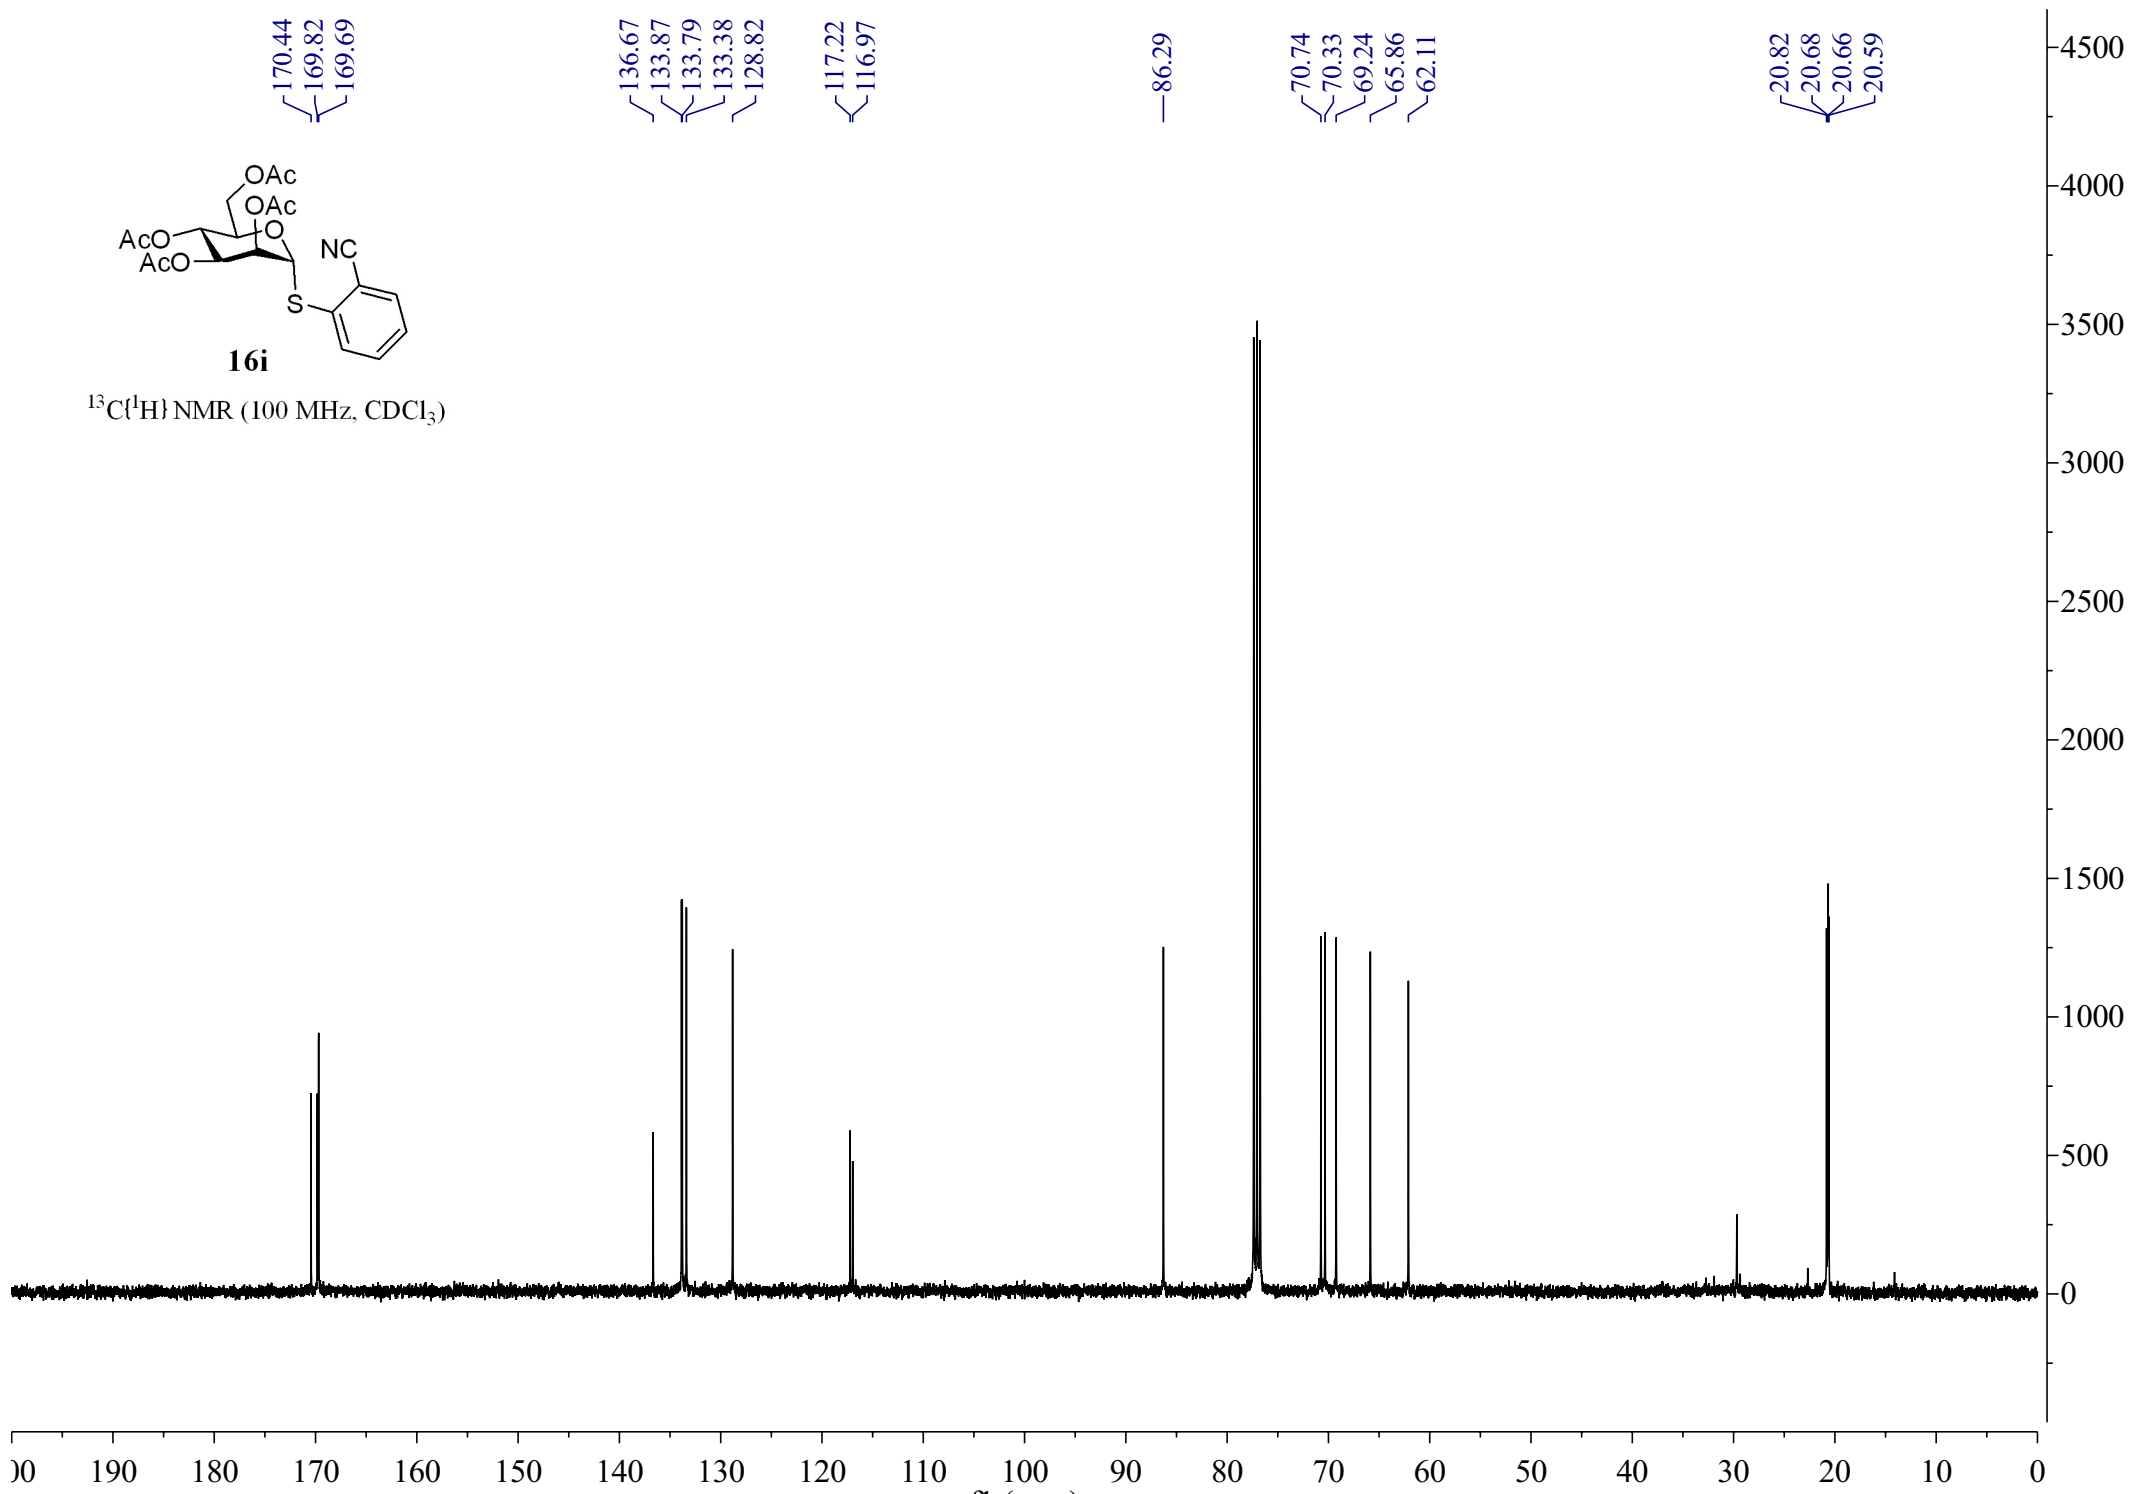

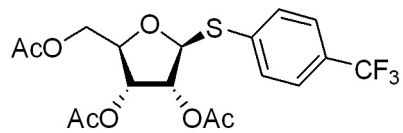

**17a**

$^1\text{H}$  NMR (400 MHz,  $\text{CDCl}_3$ )

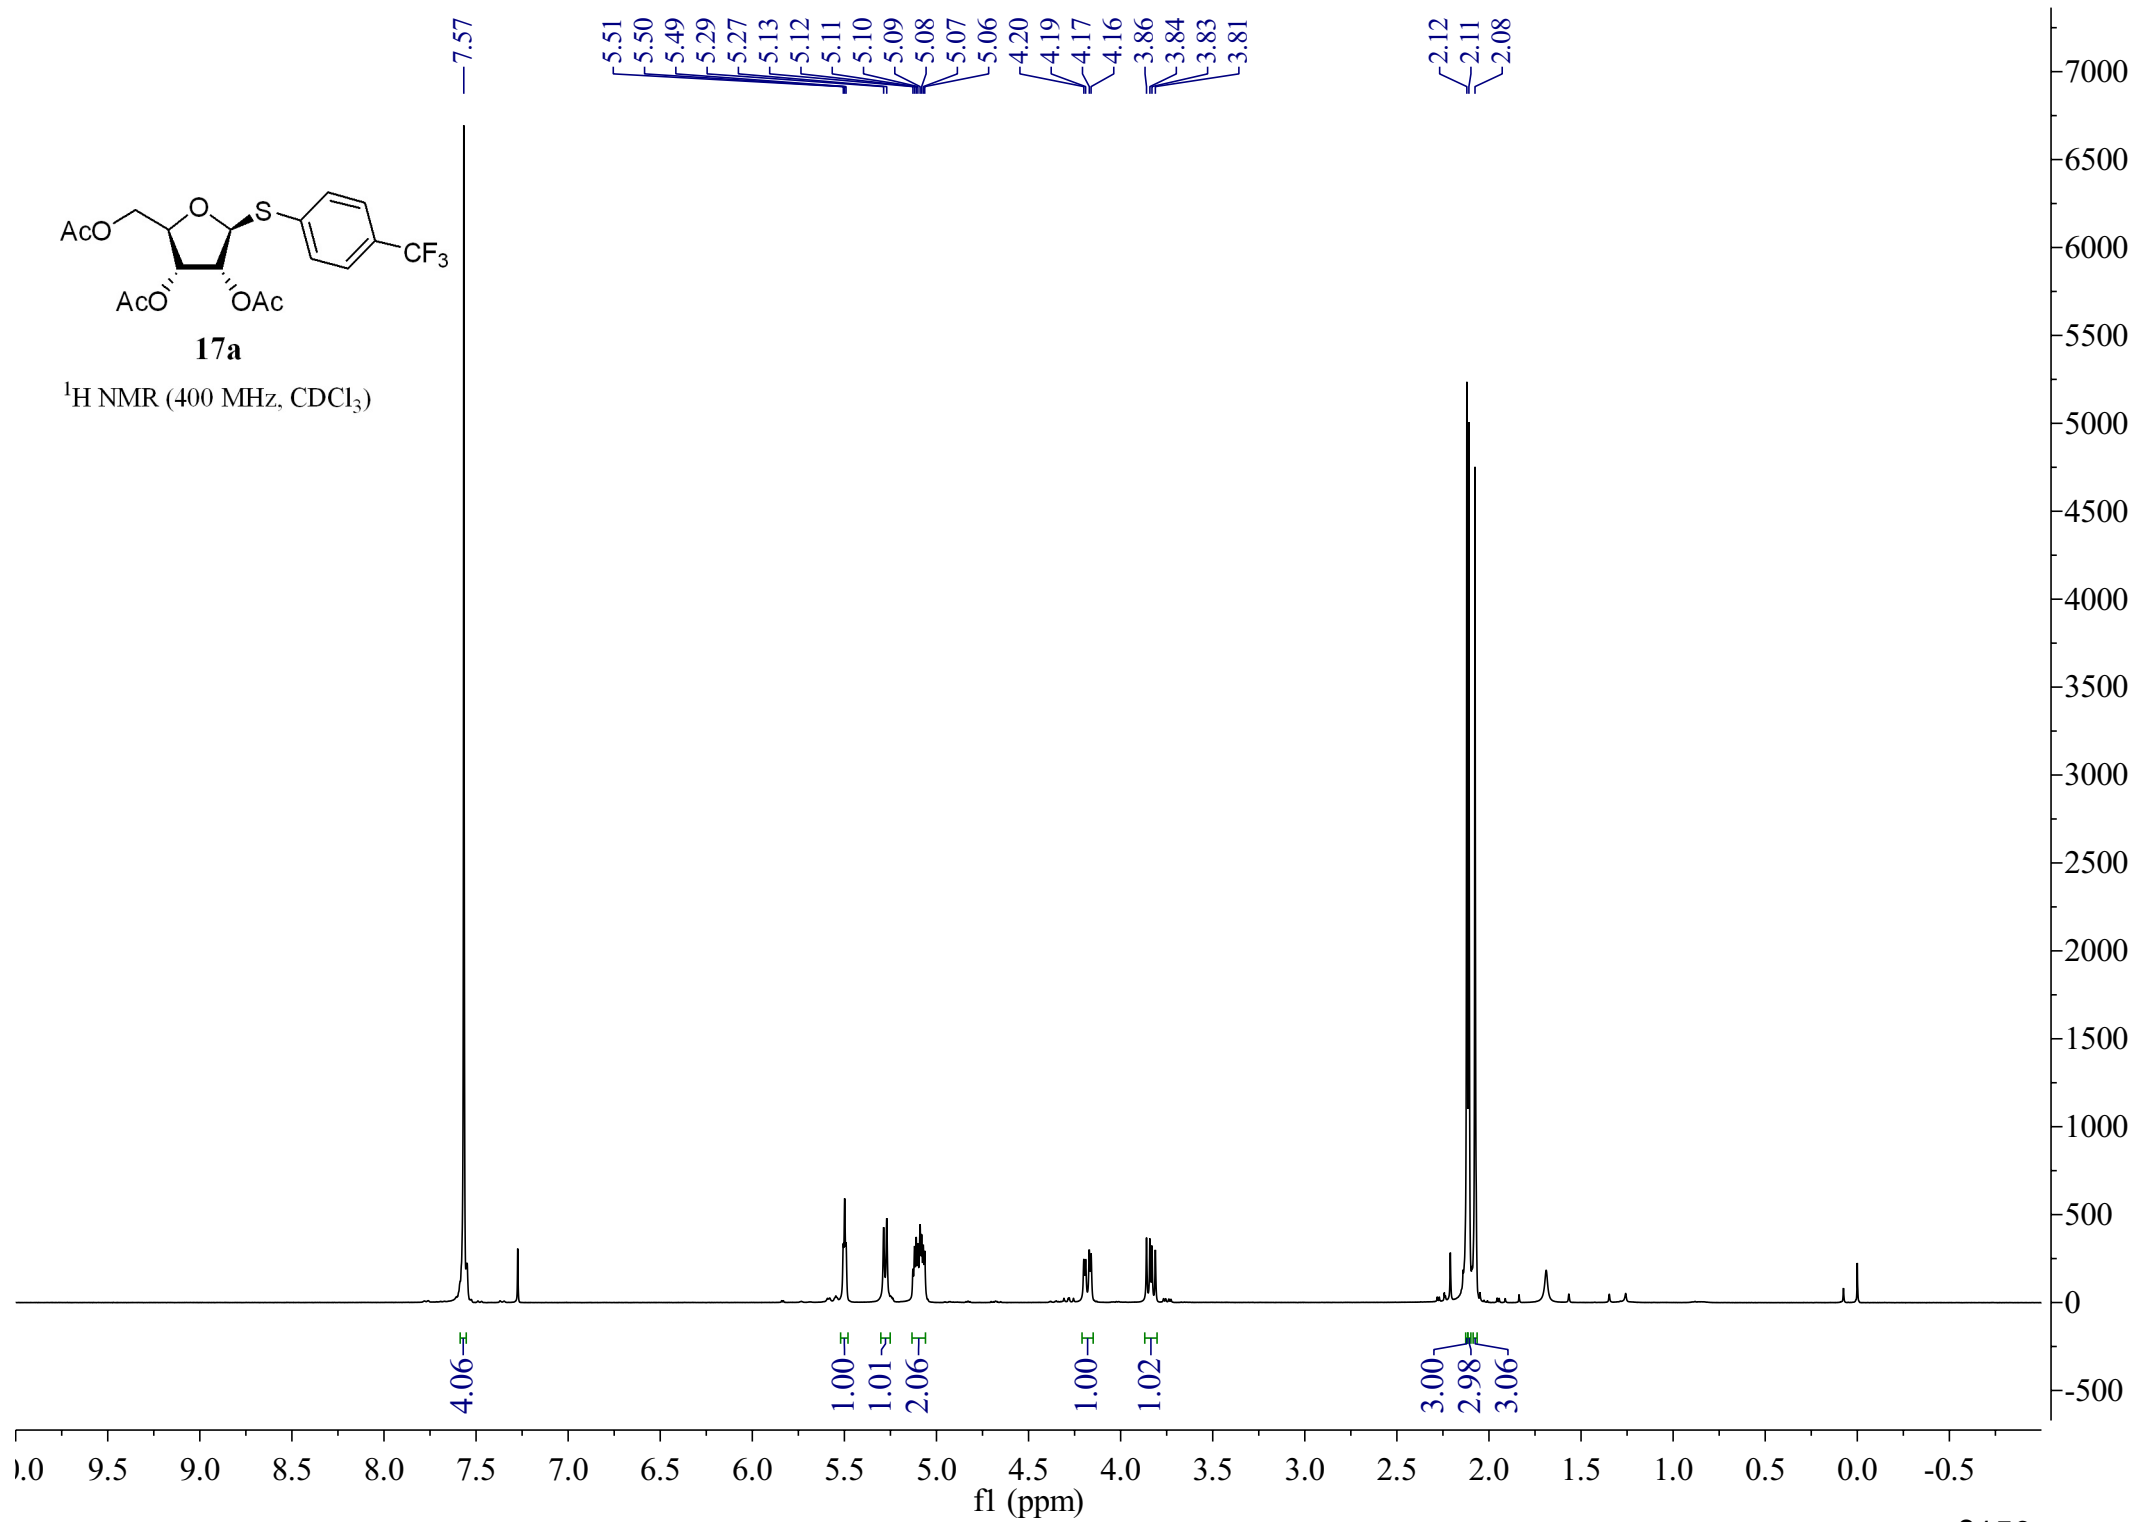

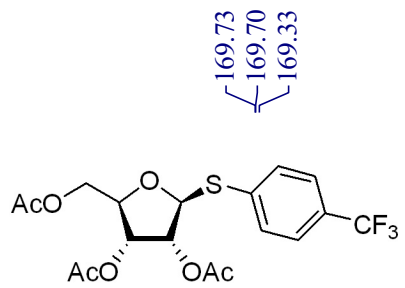

**17a**

$^{13}\text{C}\{^1\text{H}\}$  NMR (100 MHz,  $\text{CDCl}_3$ )

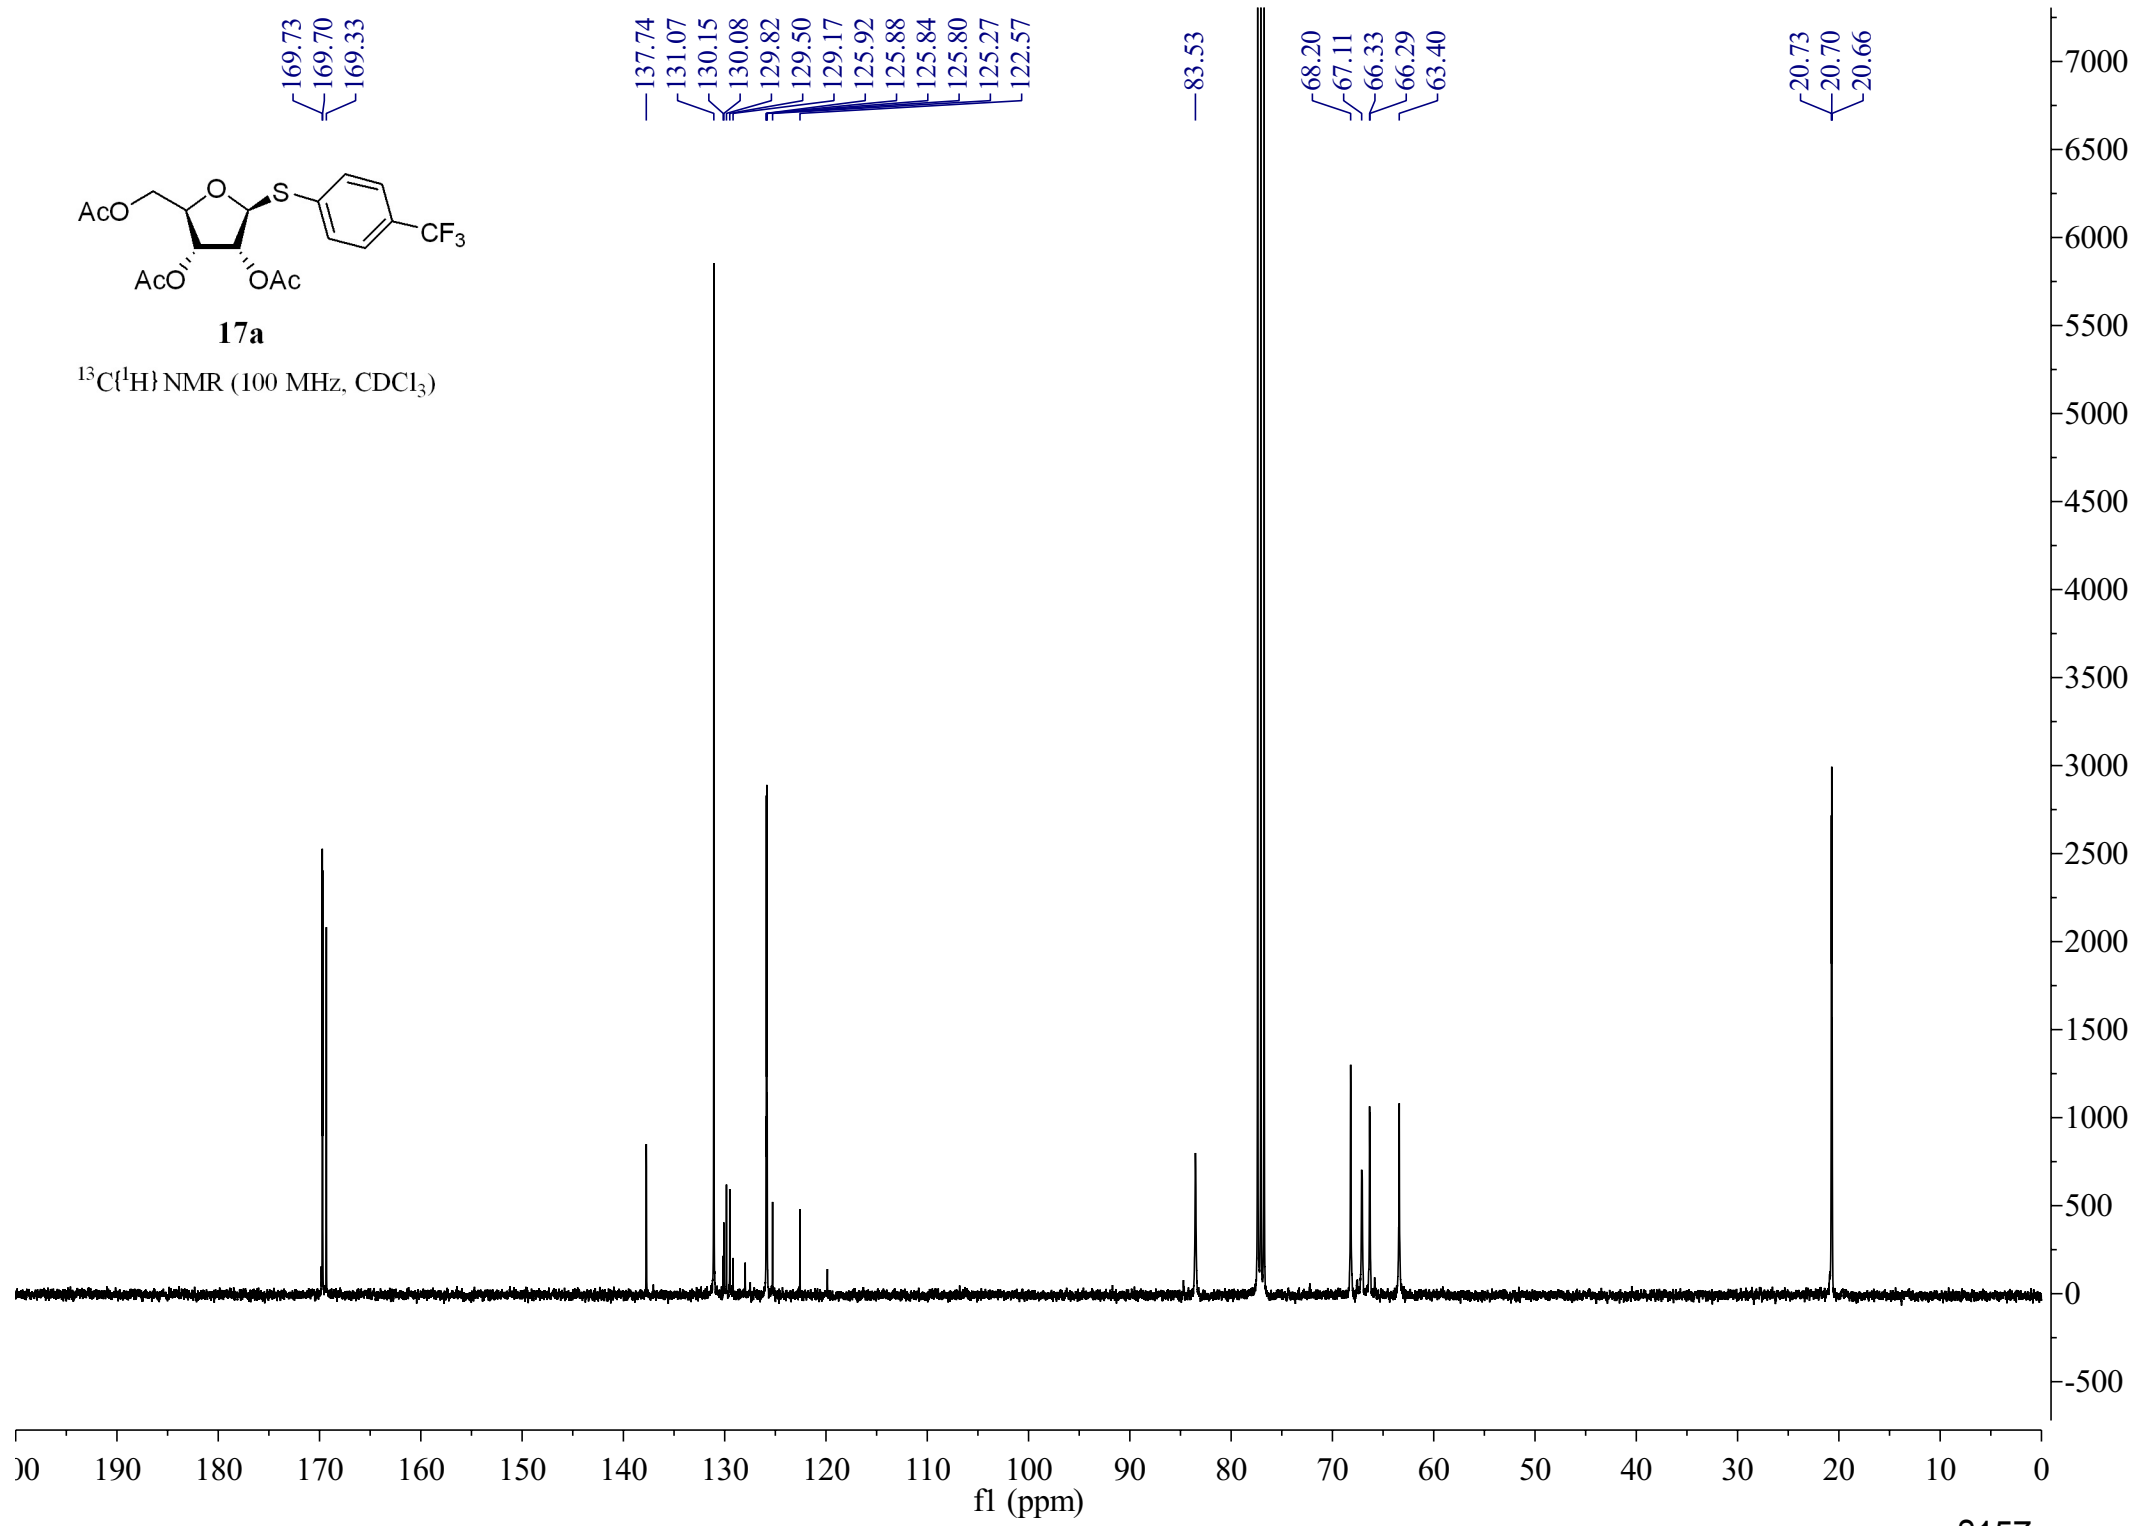

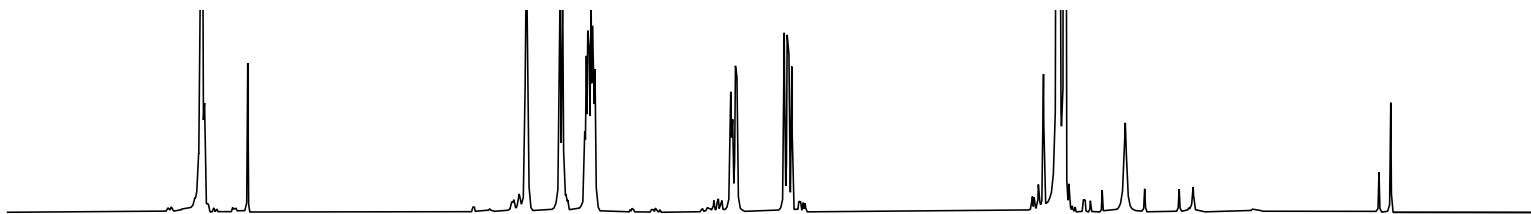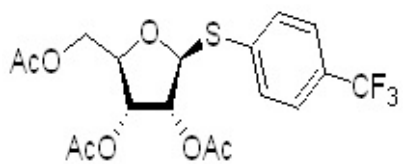

17a

$^1\text{H}$ - $^1\text{H}$  COSY (400 MHz,  $\text{CDCl}_3$ )

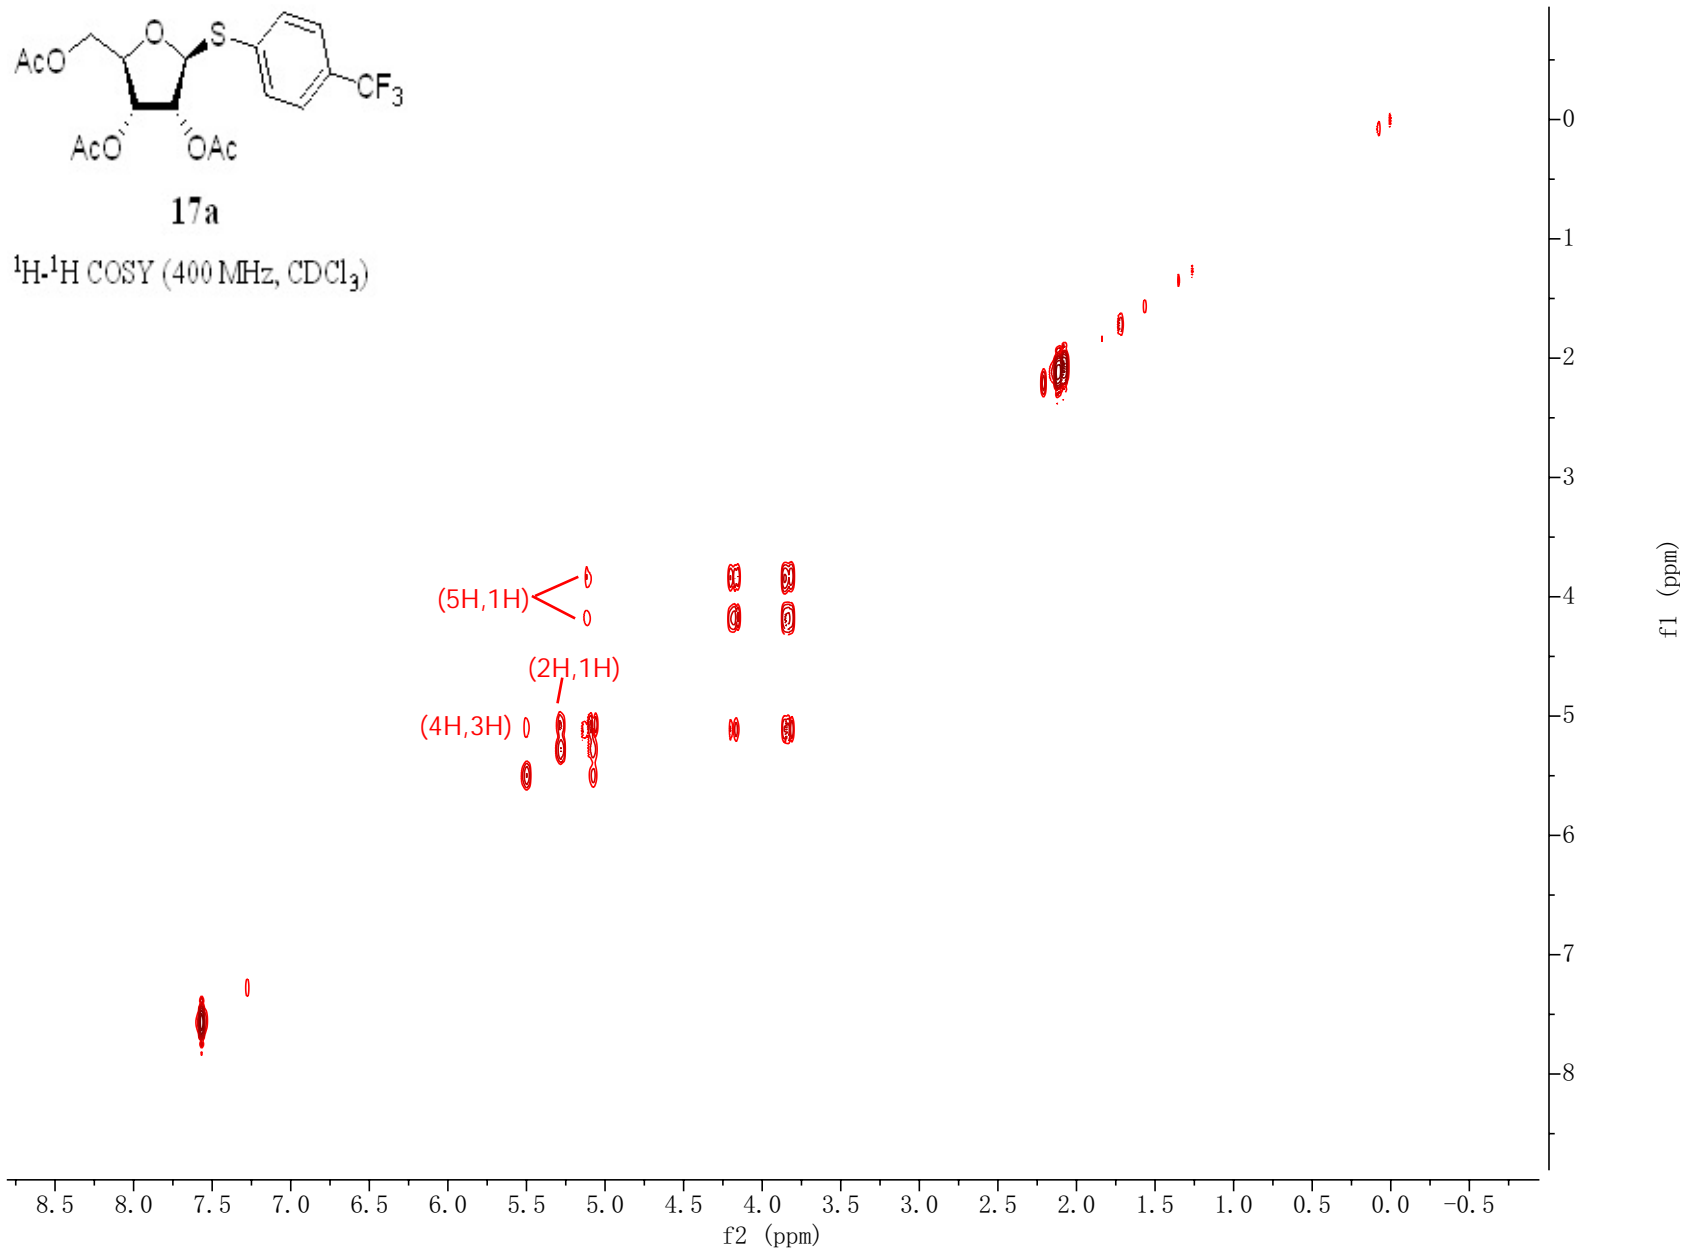

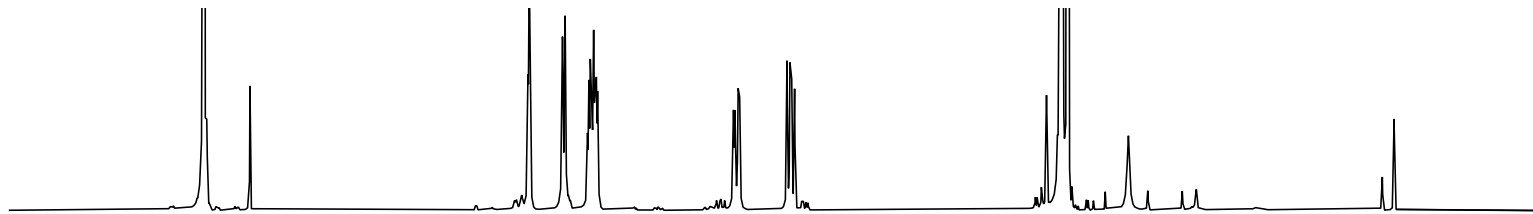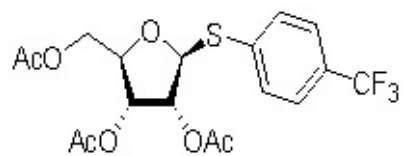

17a

HSQC (400 MHz, CDCl<sub>3</sub>)

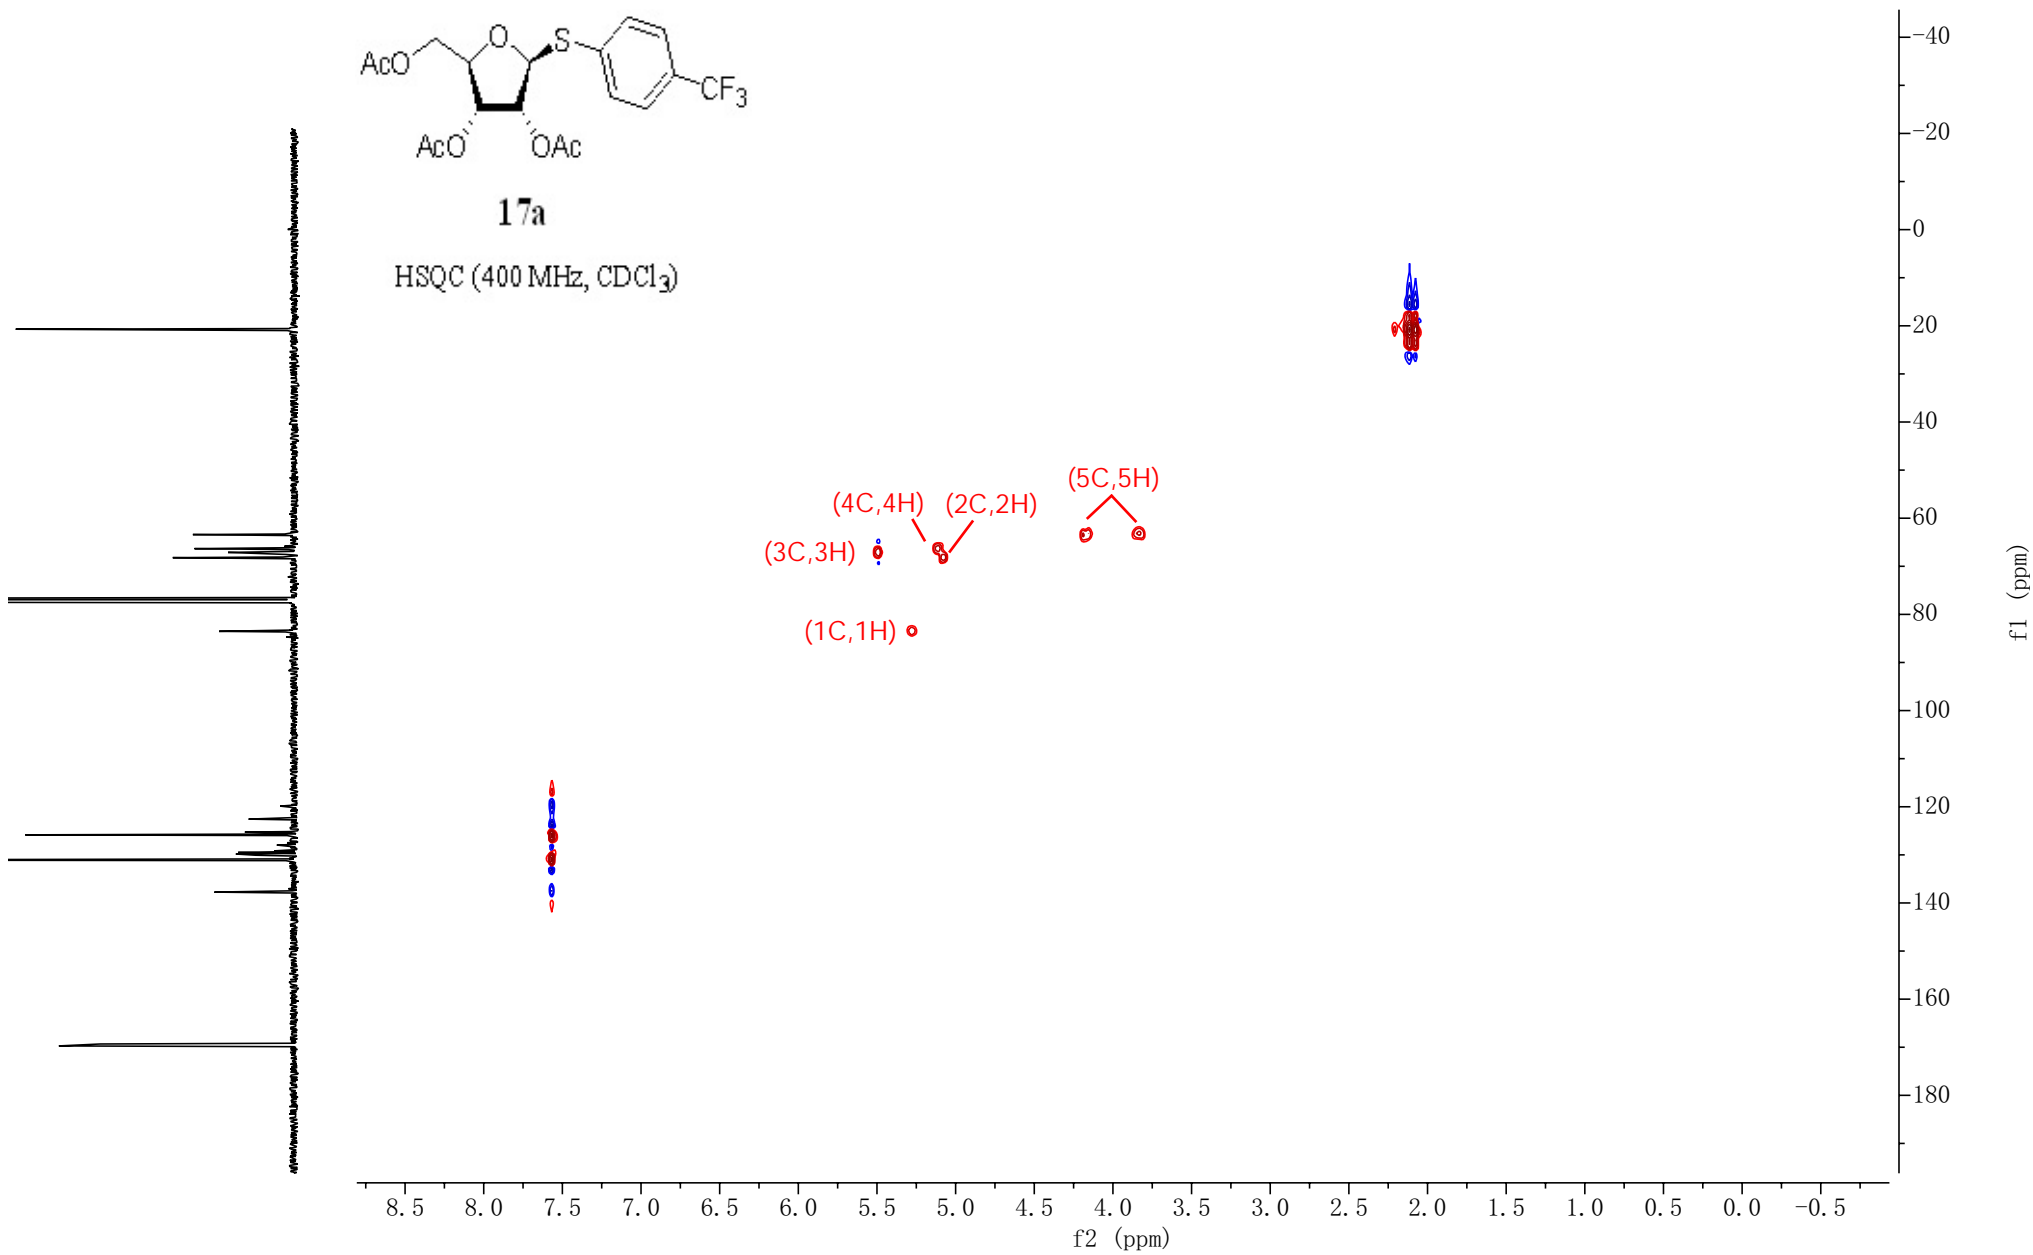

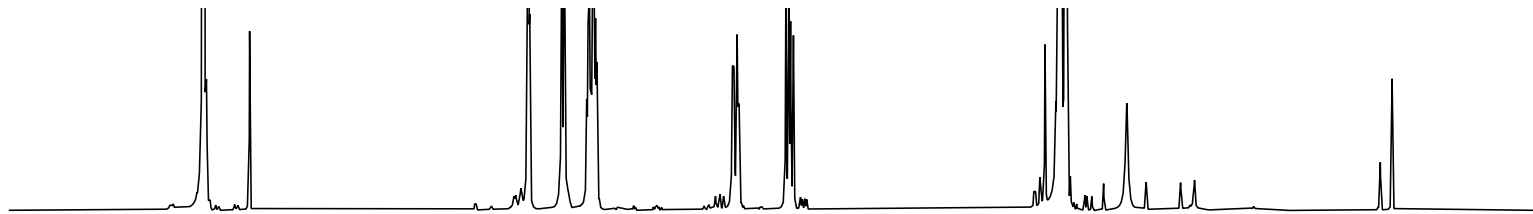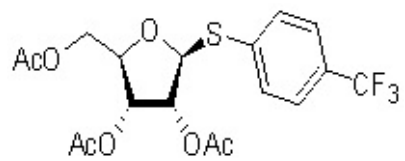

17a

HMBC (400 MHz, CDCl<sub>3</sub>)

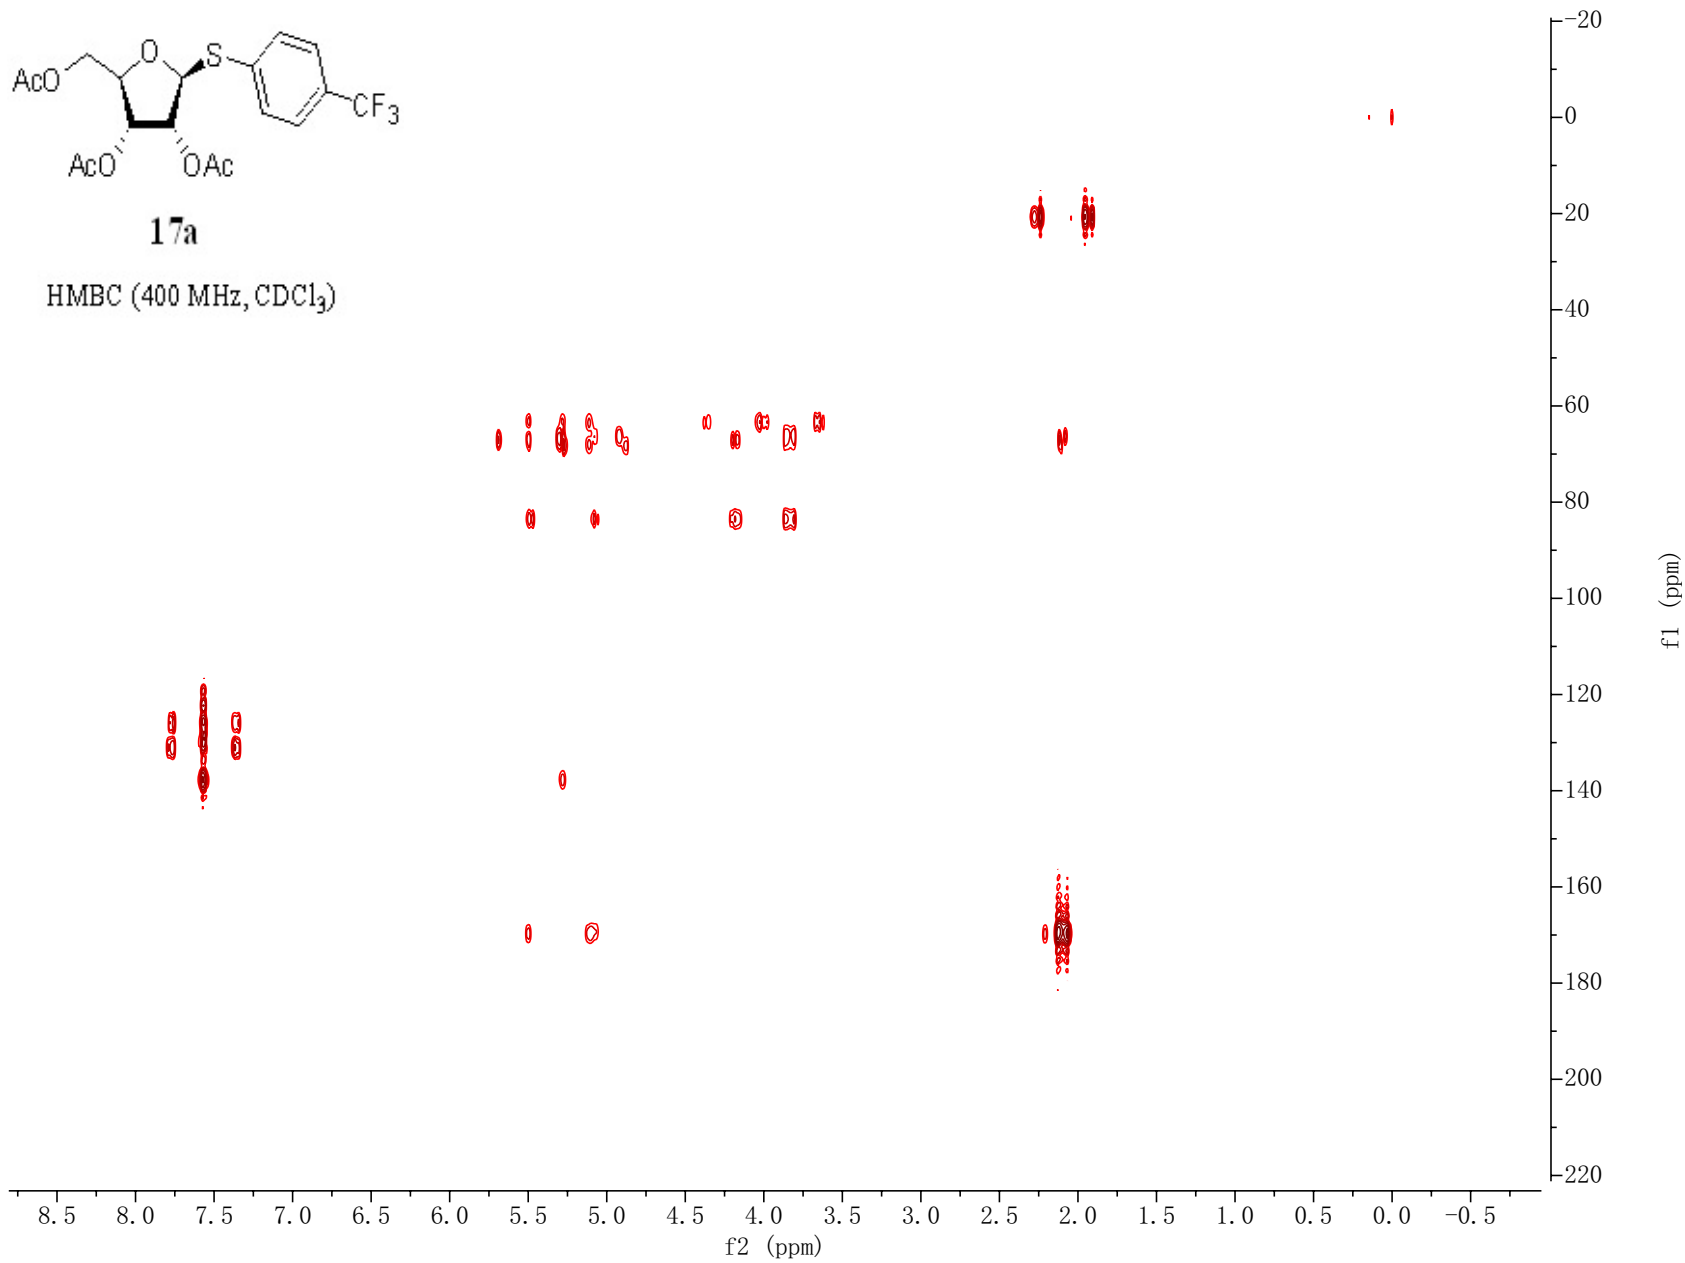

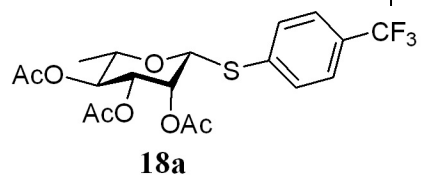

<sup>1</sup>H NMR (400 MHz, CDCl<sub>3</sub>)

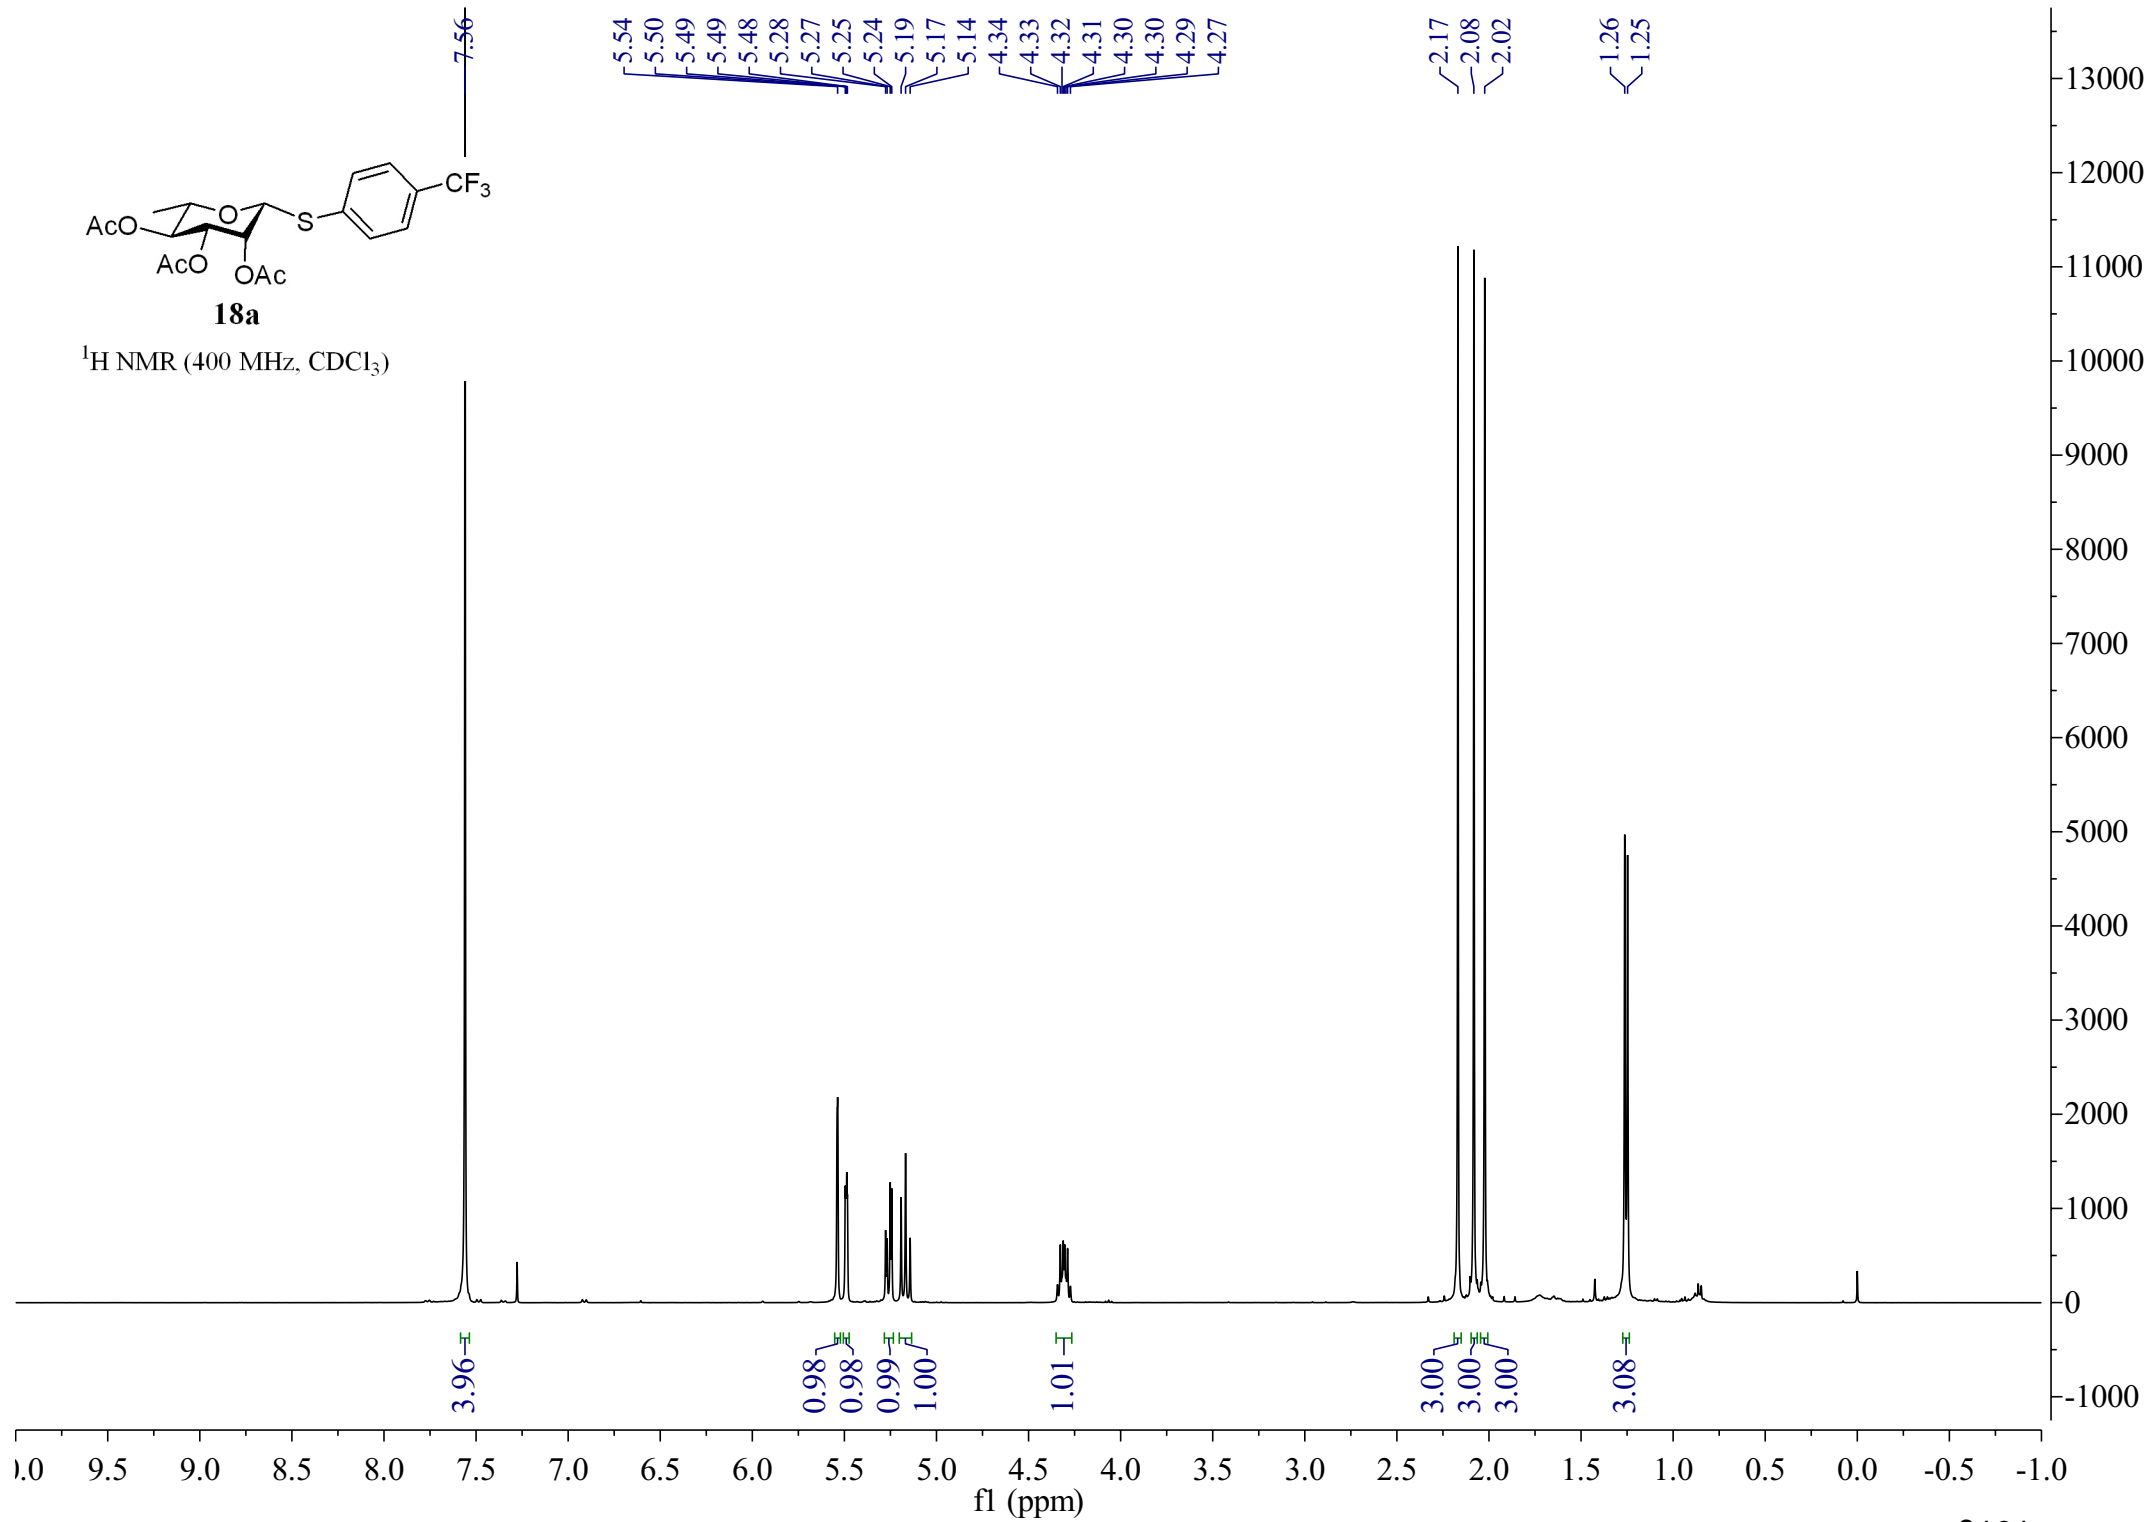



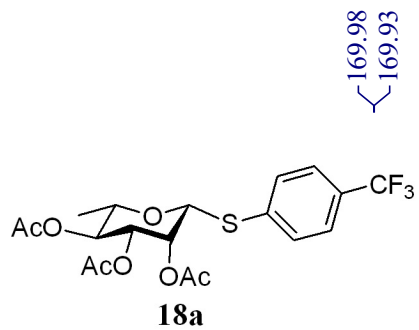

$^{13}\text{C}\{^1\text{H}\}$  NMR (100 MHz,  $\text{CDCl}_3$ )

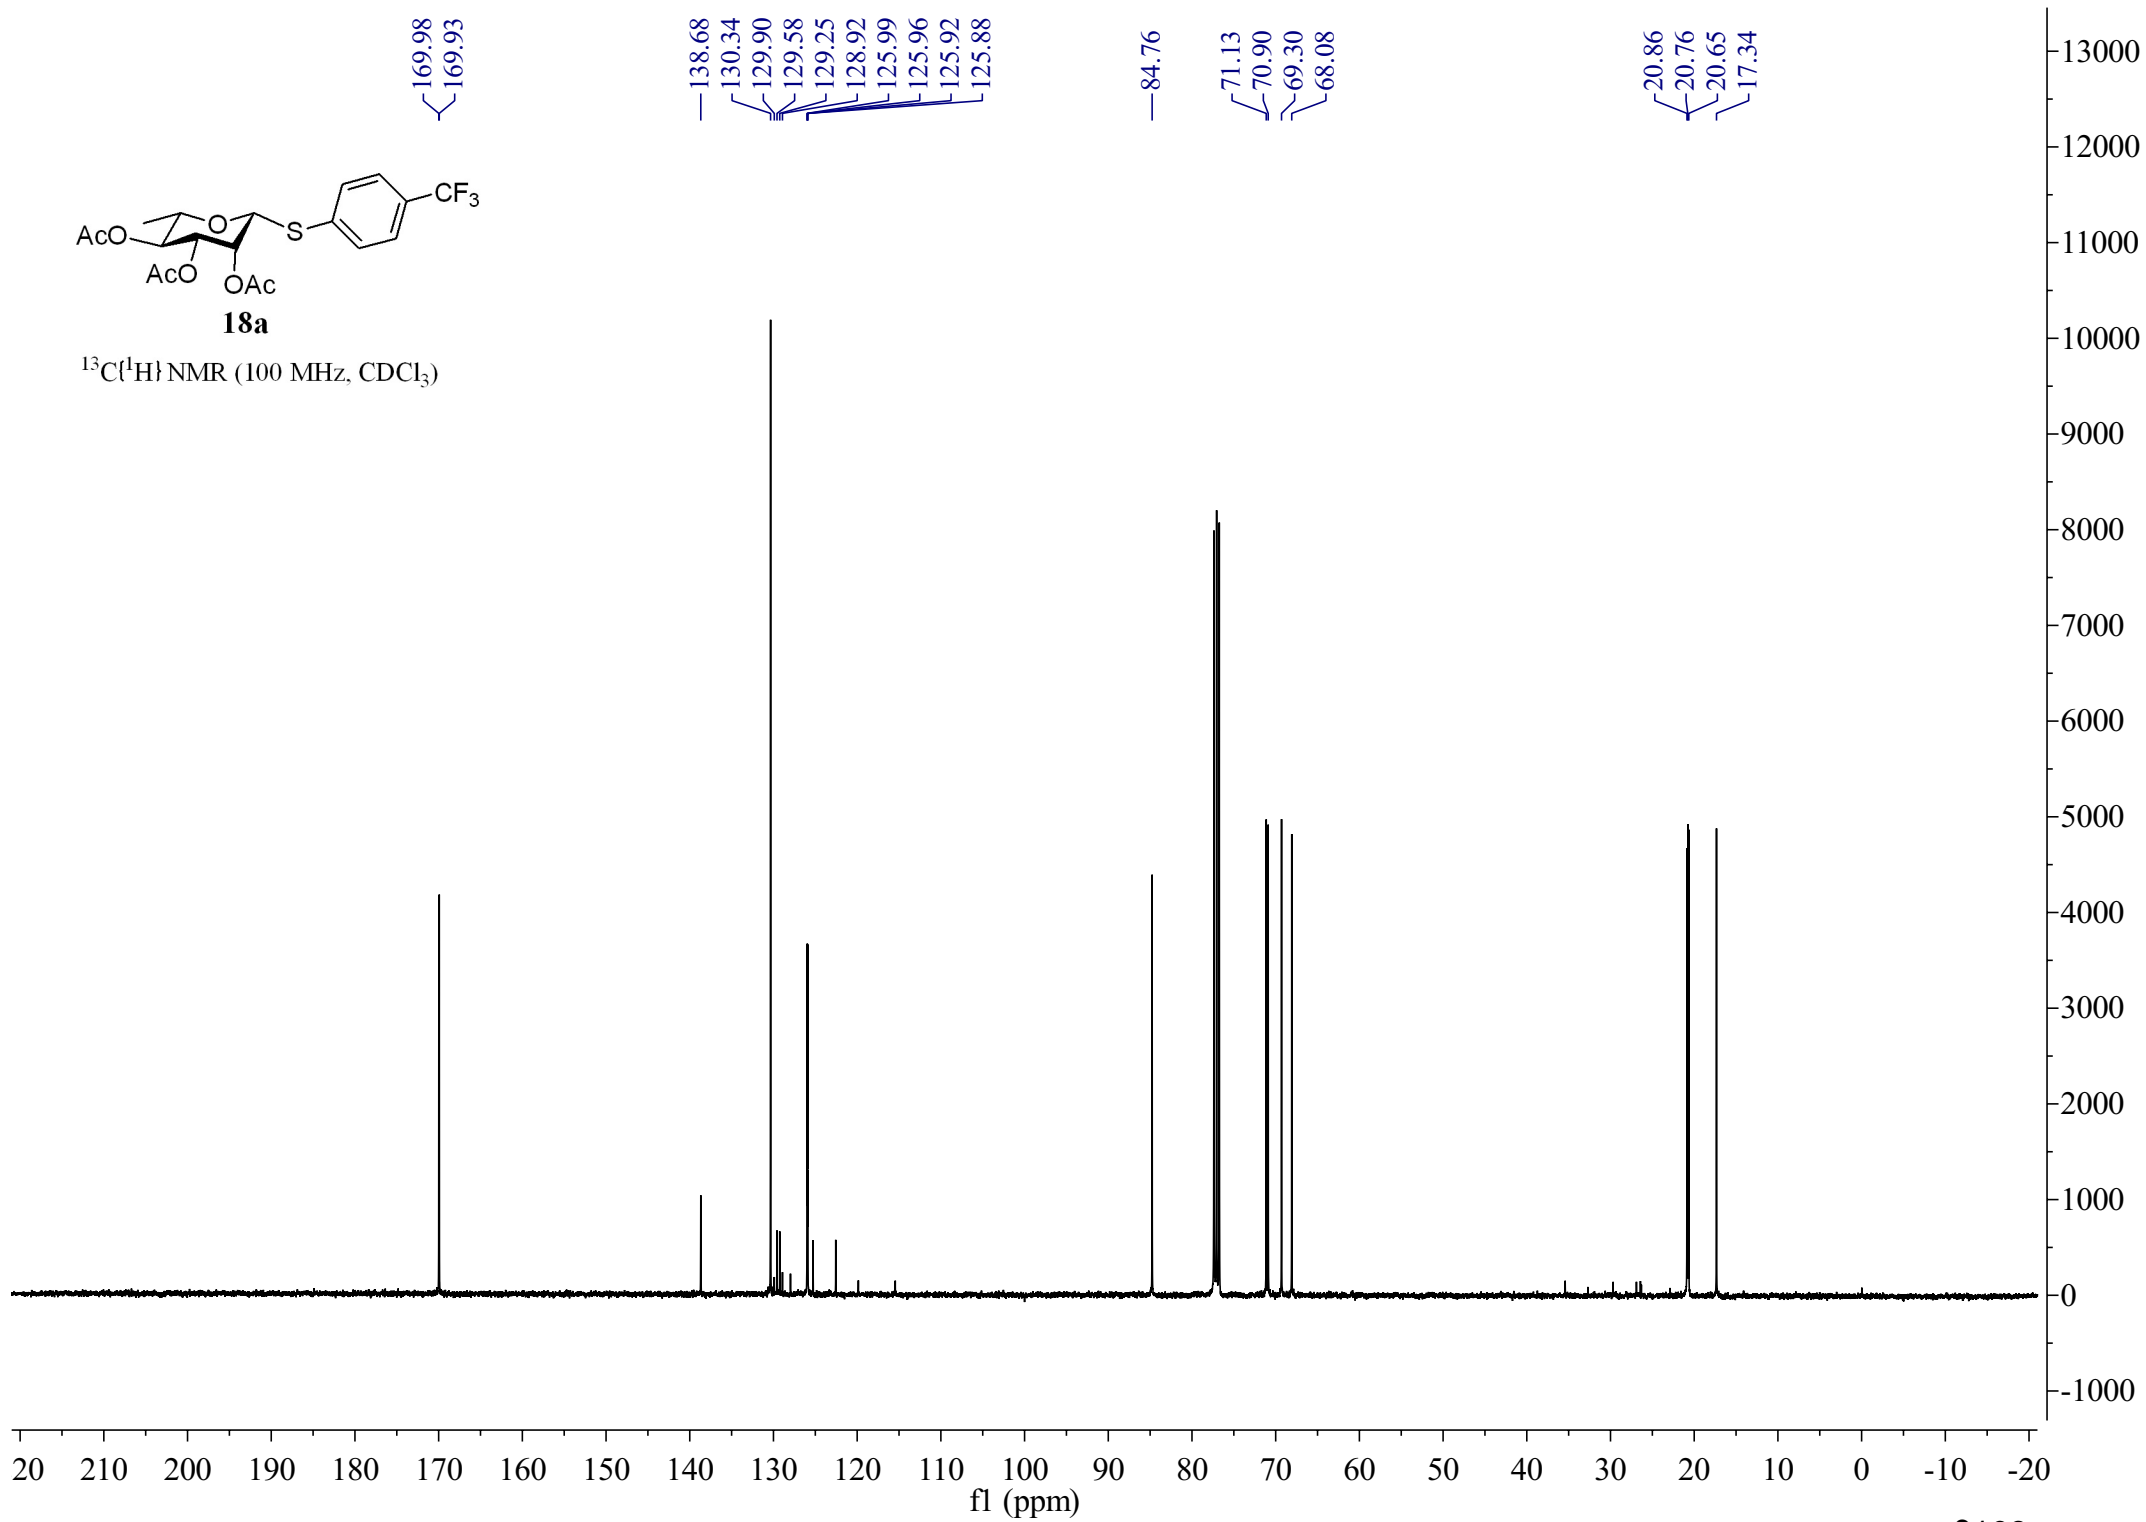

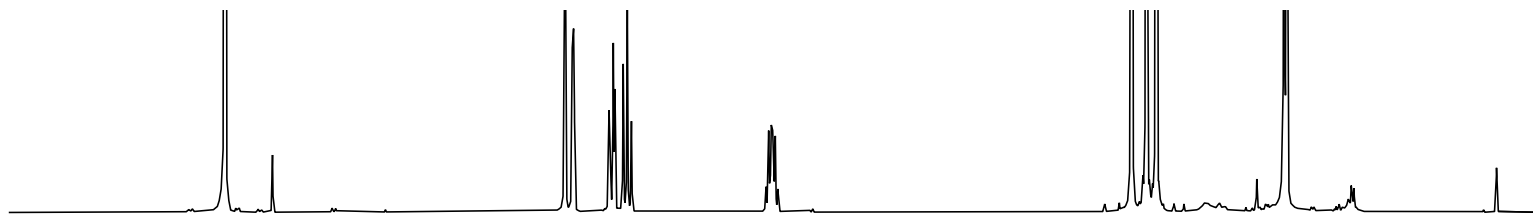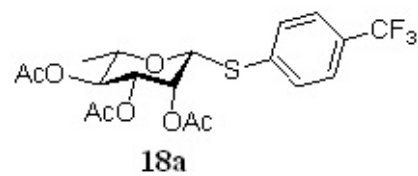

<sup>1</sup>H-<sup>1</sup>H COSY (400 MHz, CDCl<sub>3</sub>)

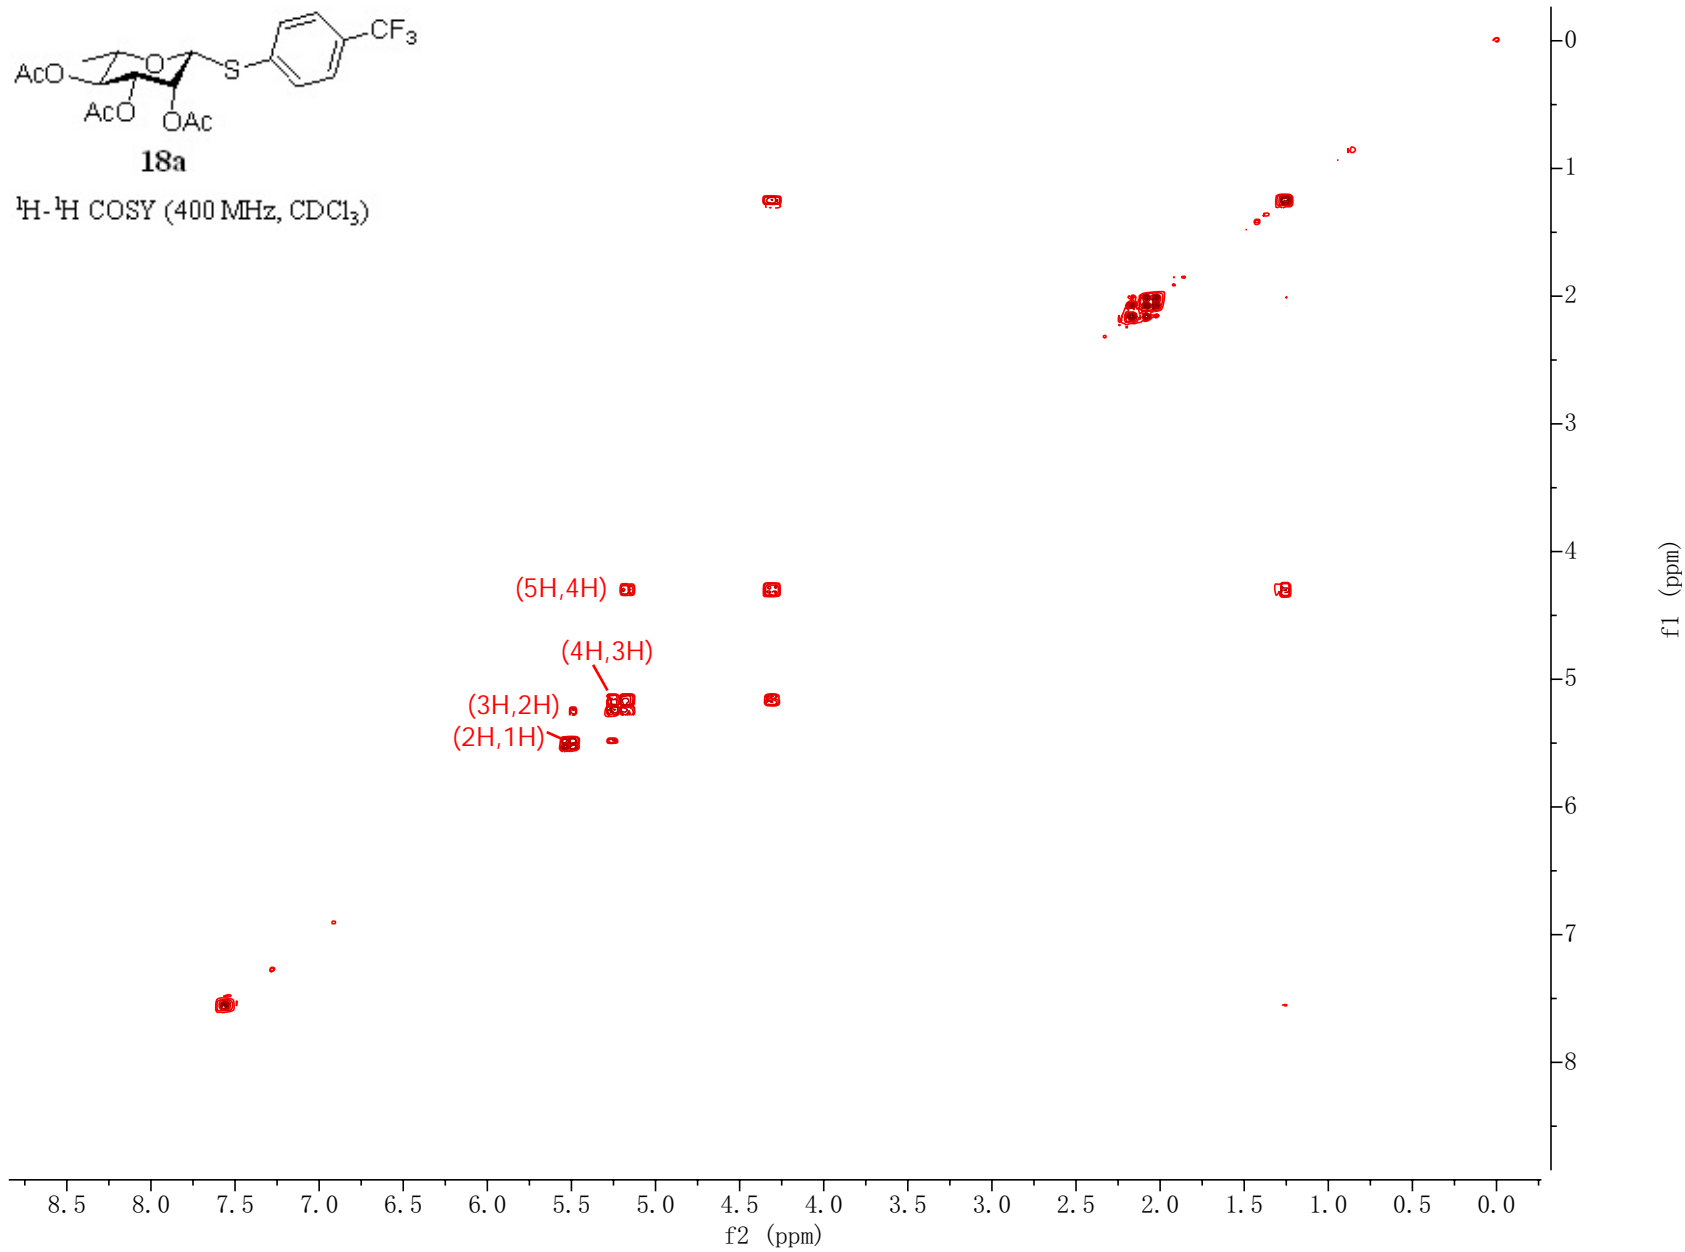

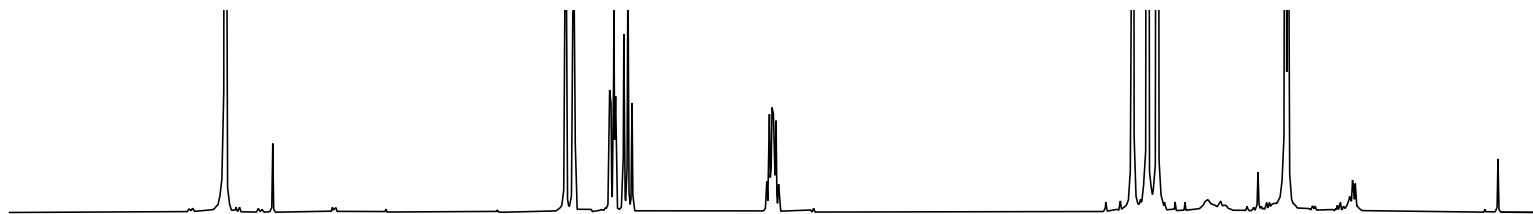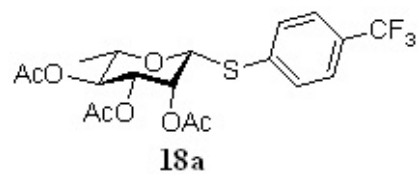

HSQC (400 MHz, CDCl<sub>3</sub>)

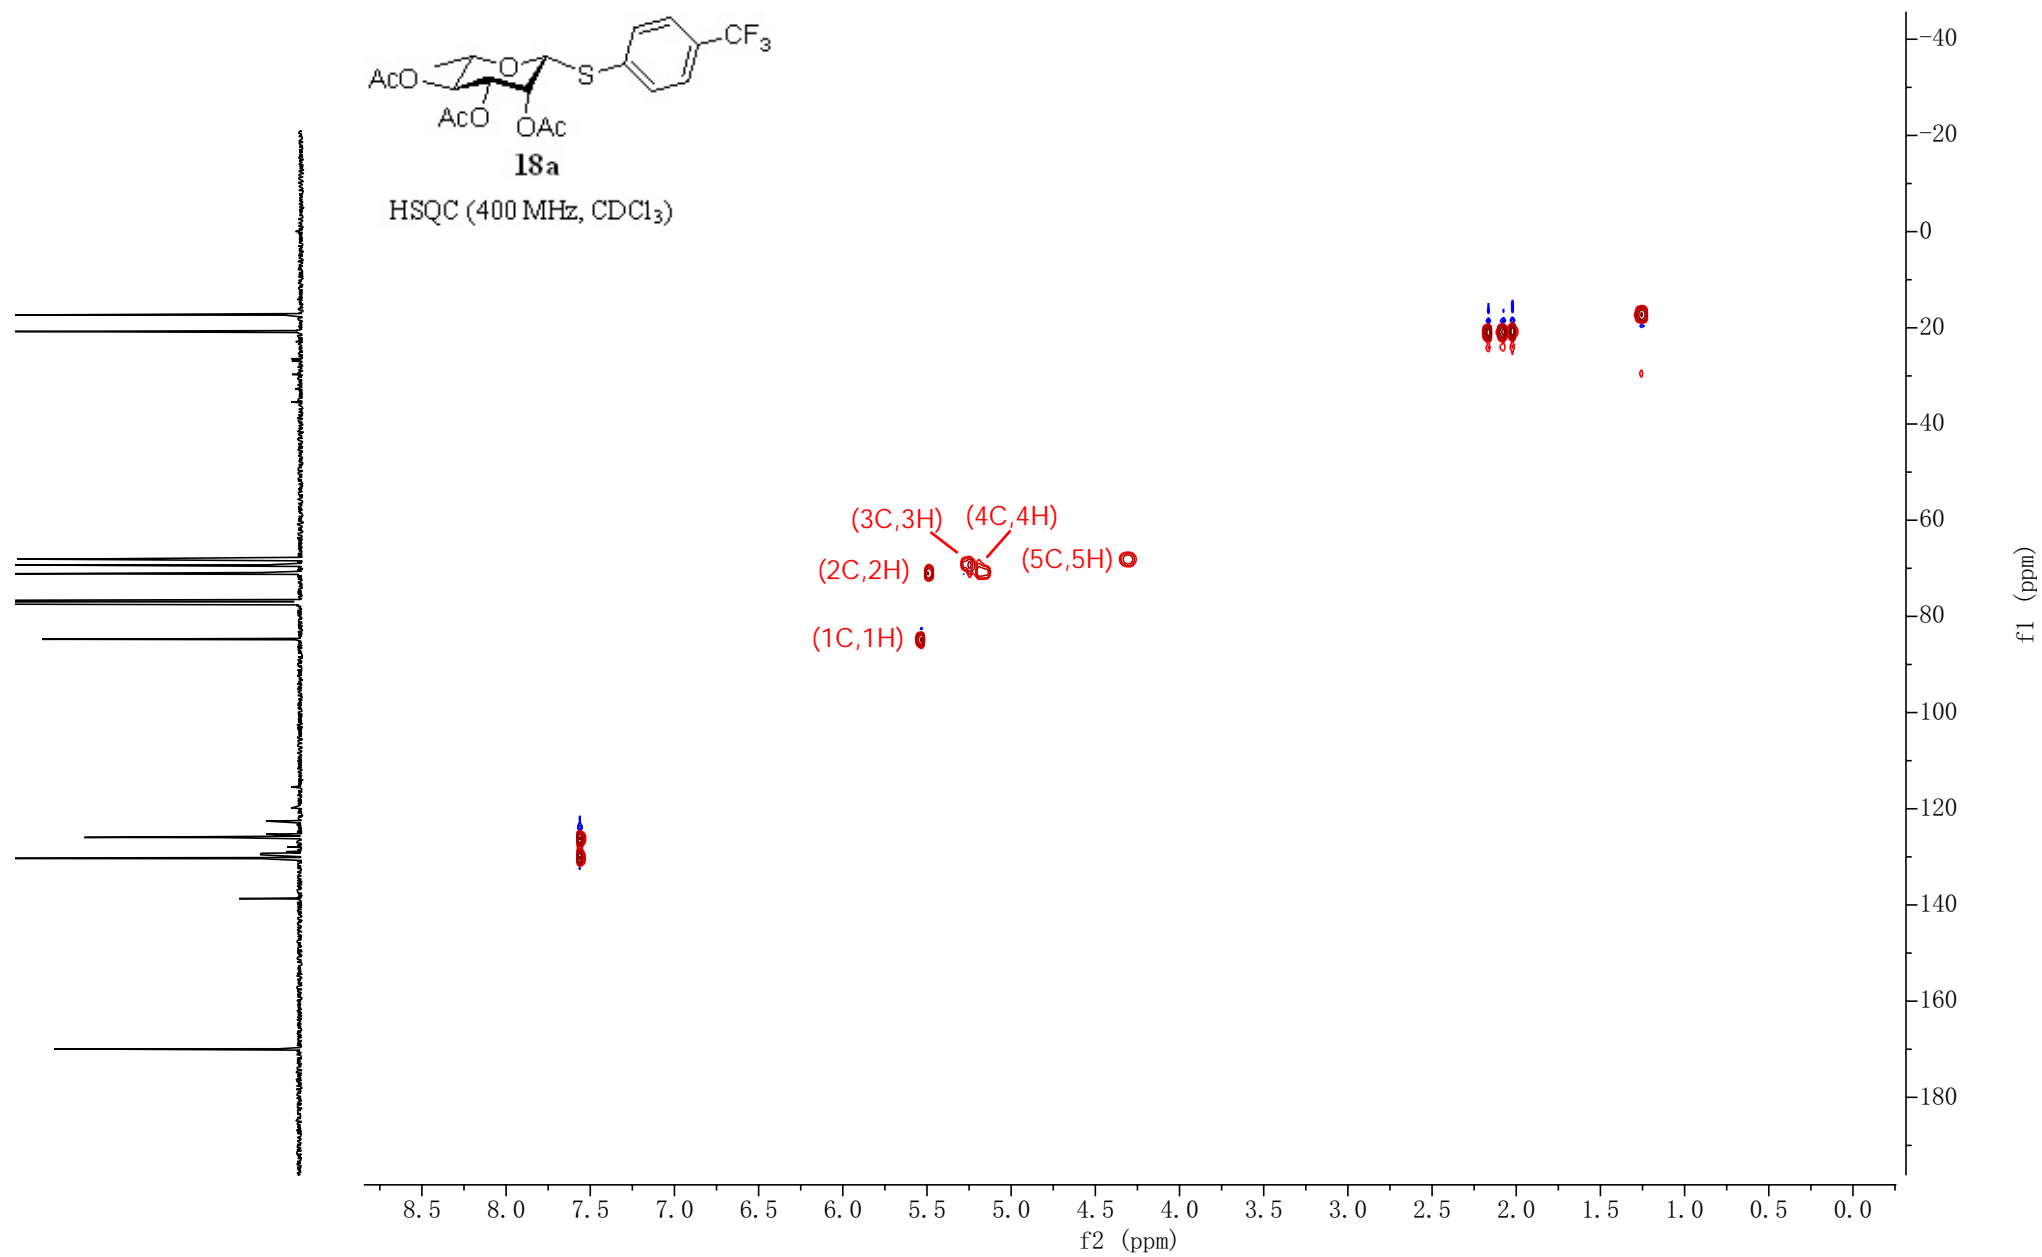

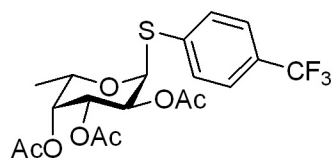

**19a**

$^1\text{H}$  NMR (400 MHz,  $\text{CDCl}_3$ )

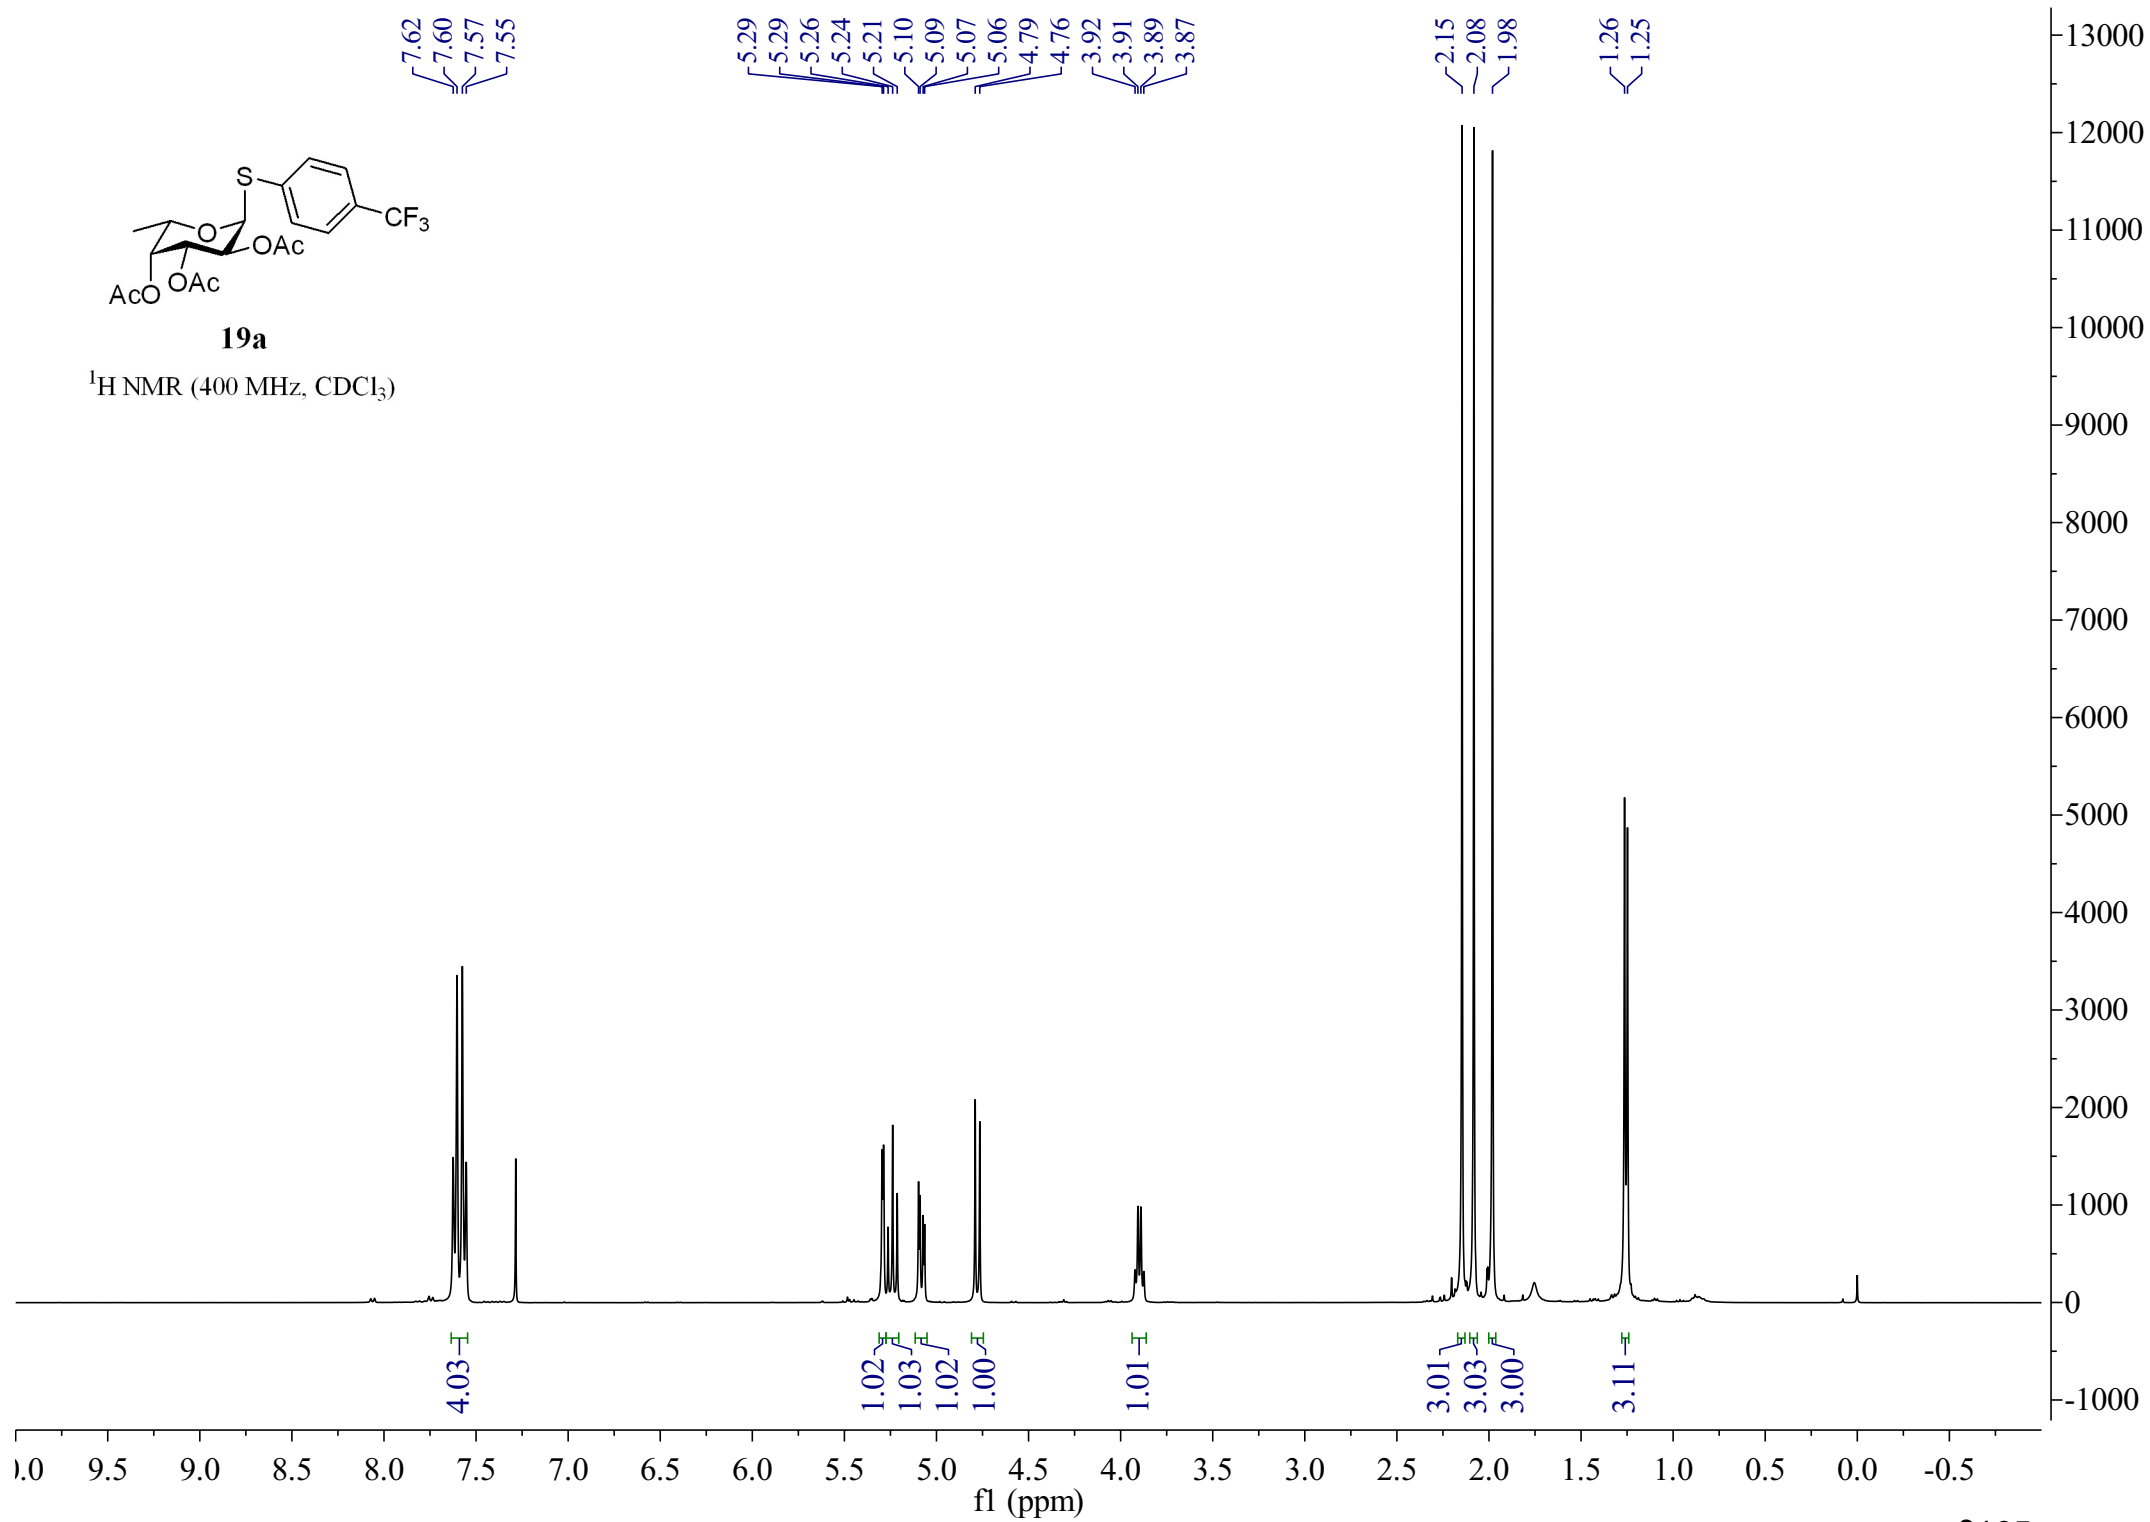

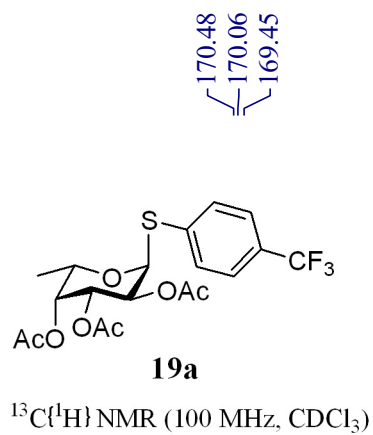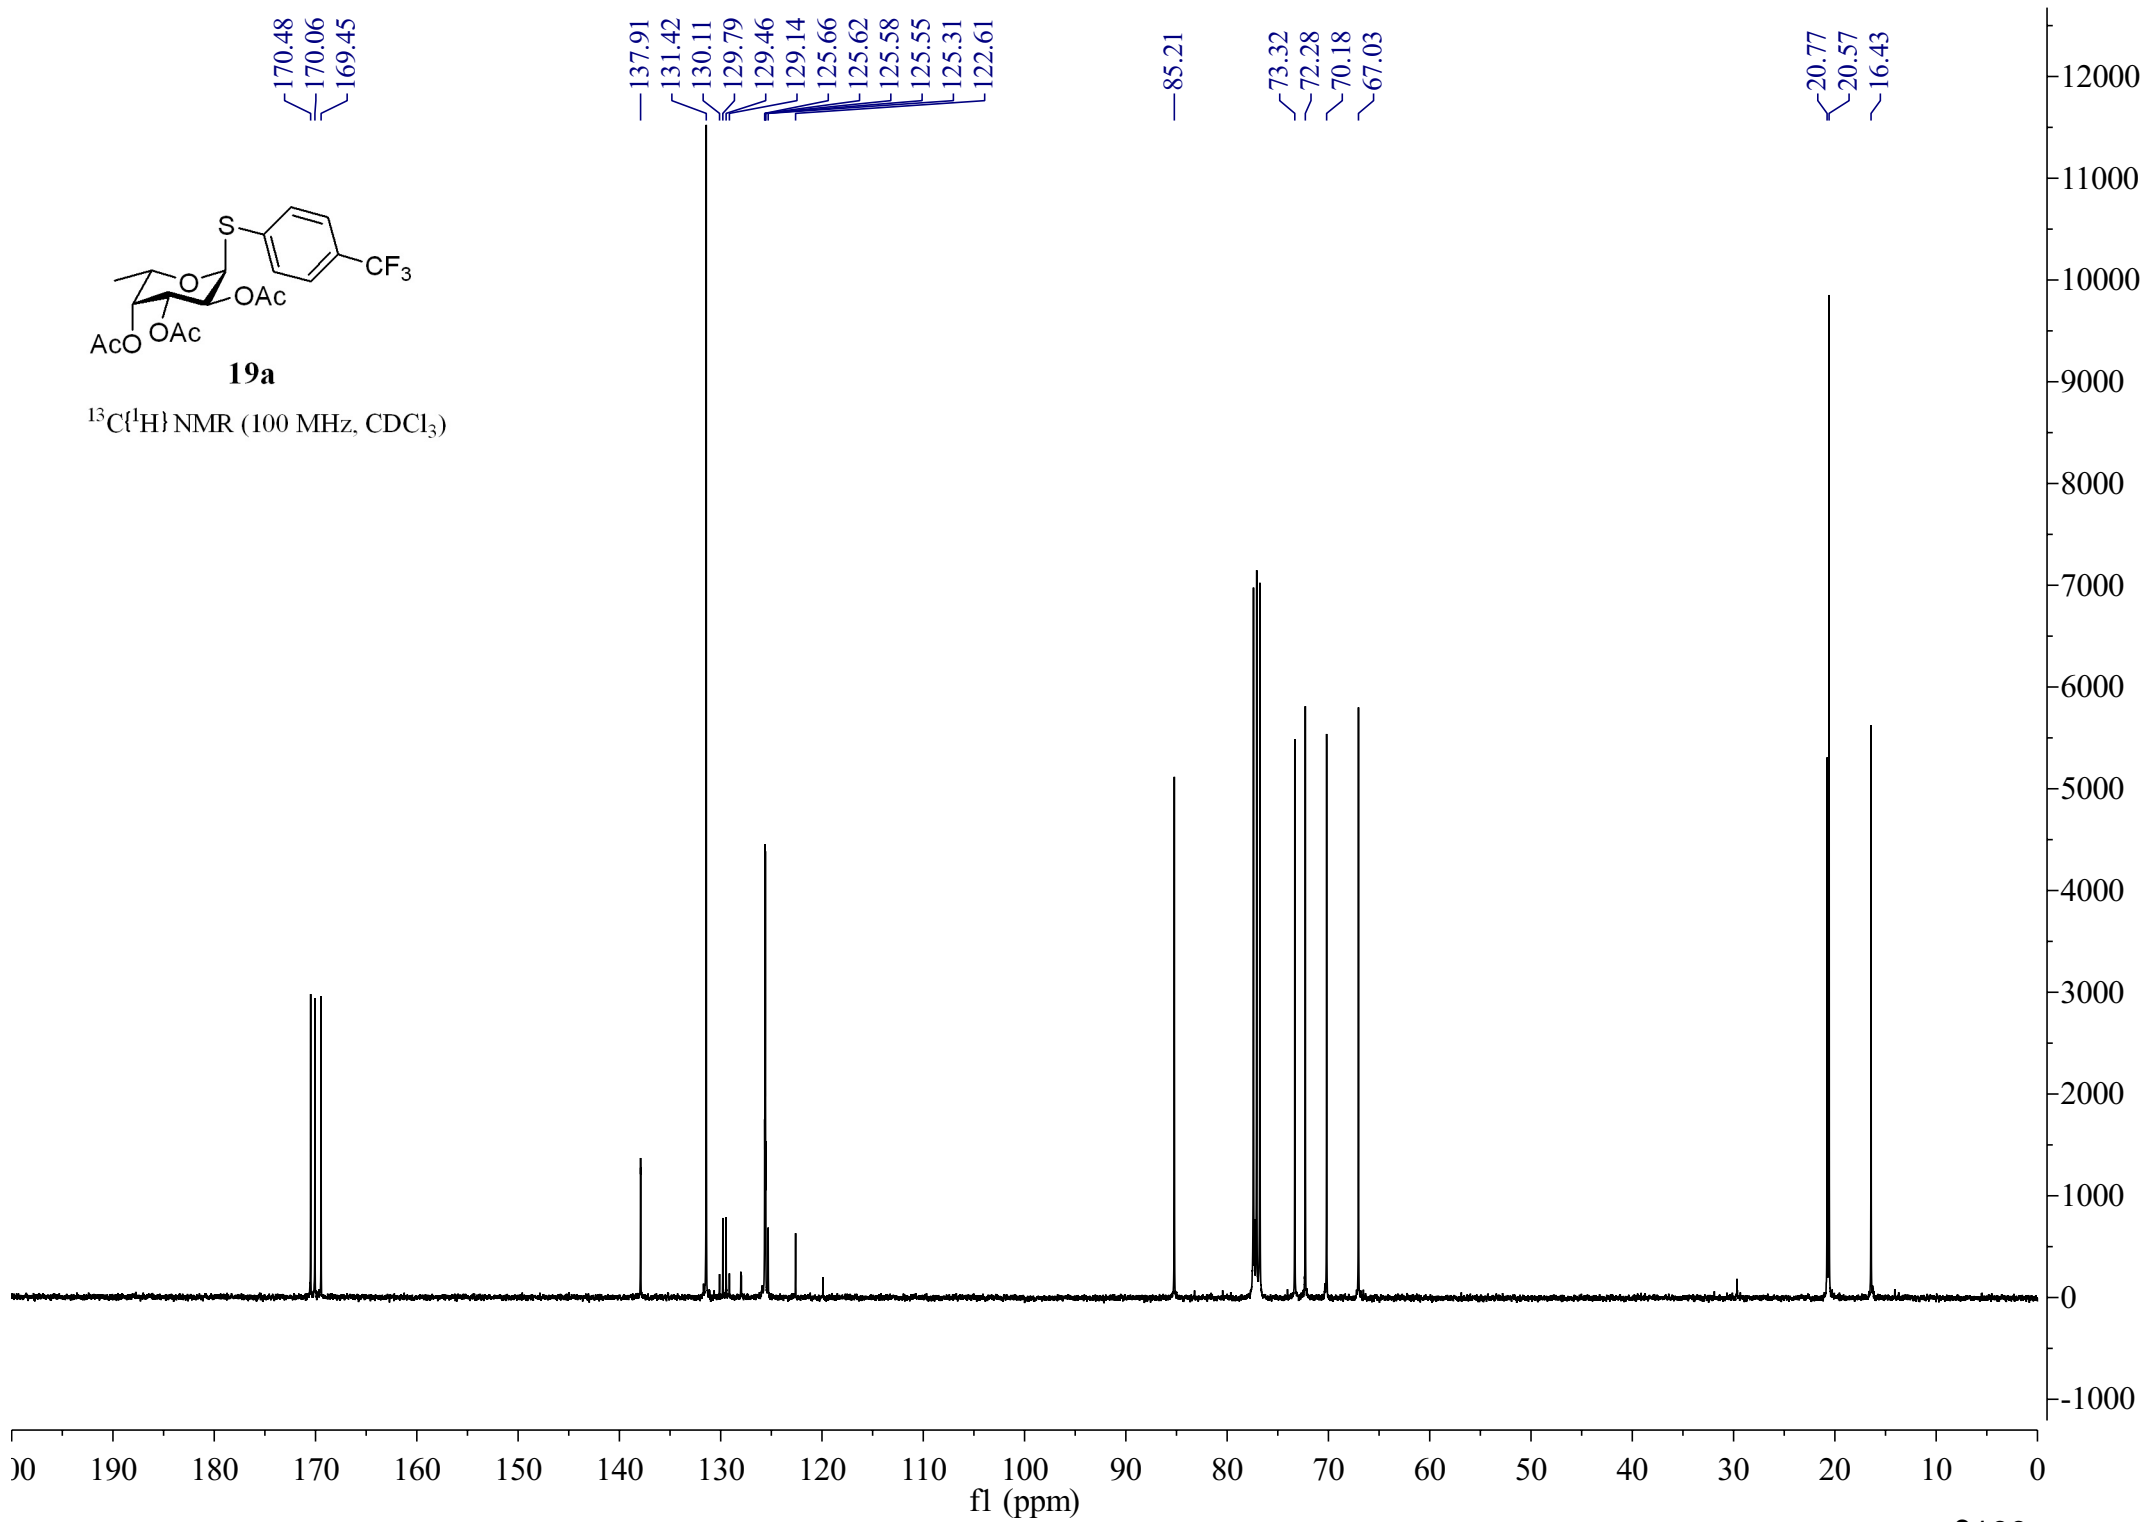

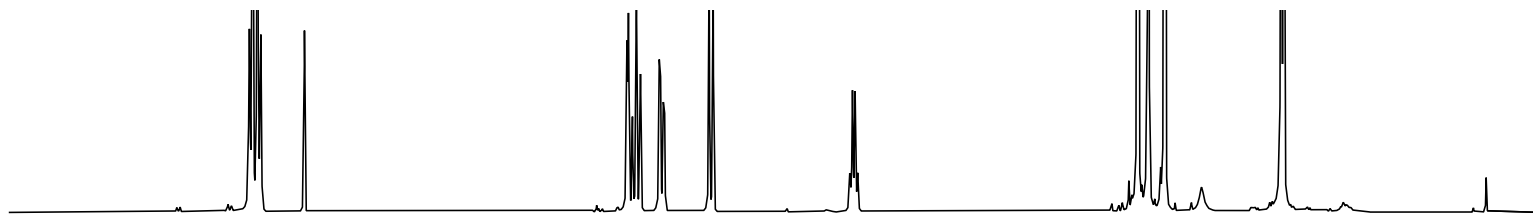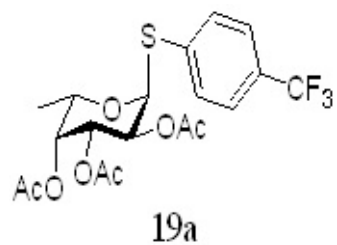

HSQC (400 MHz, CDCl<sub>3</sub>)

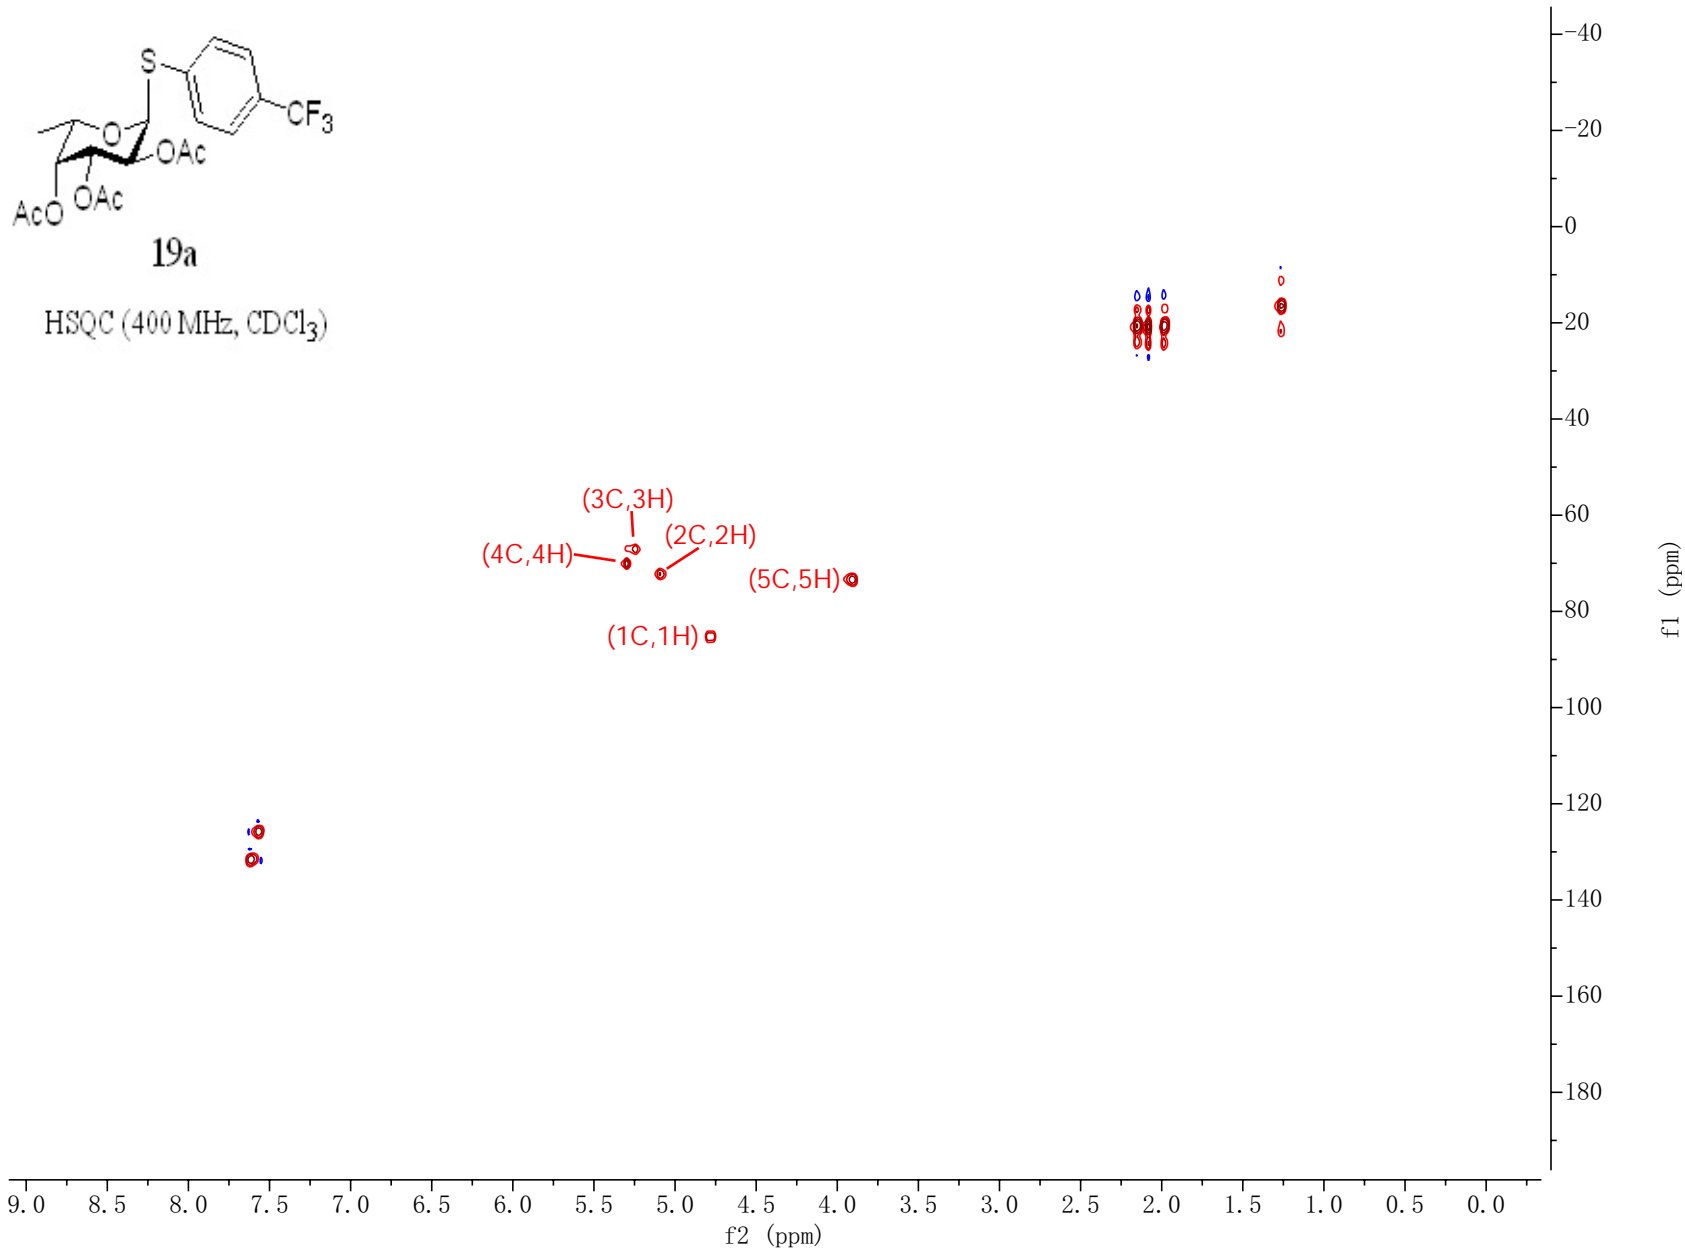

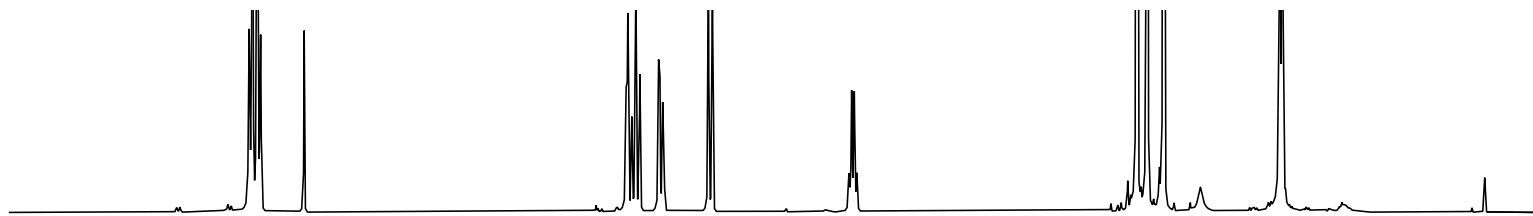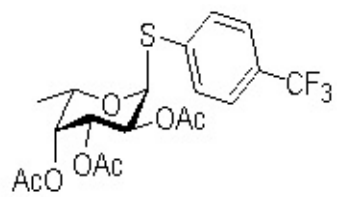

19a

$^1\text{H}$ - $^1\text{H}$  COSY (400 MHz,  $\text{CDCl}_3$ )

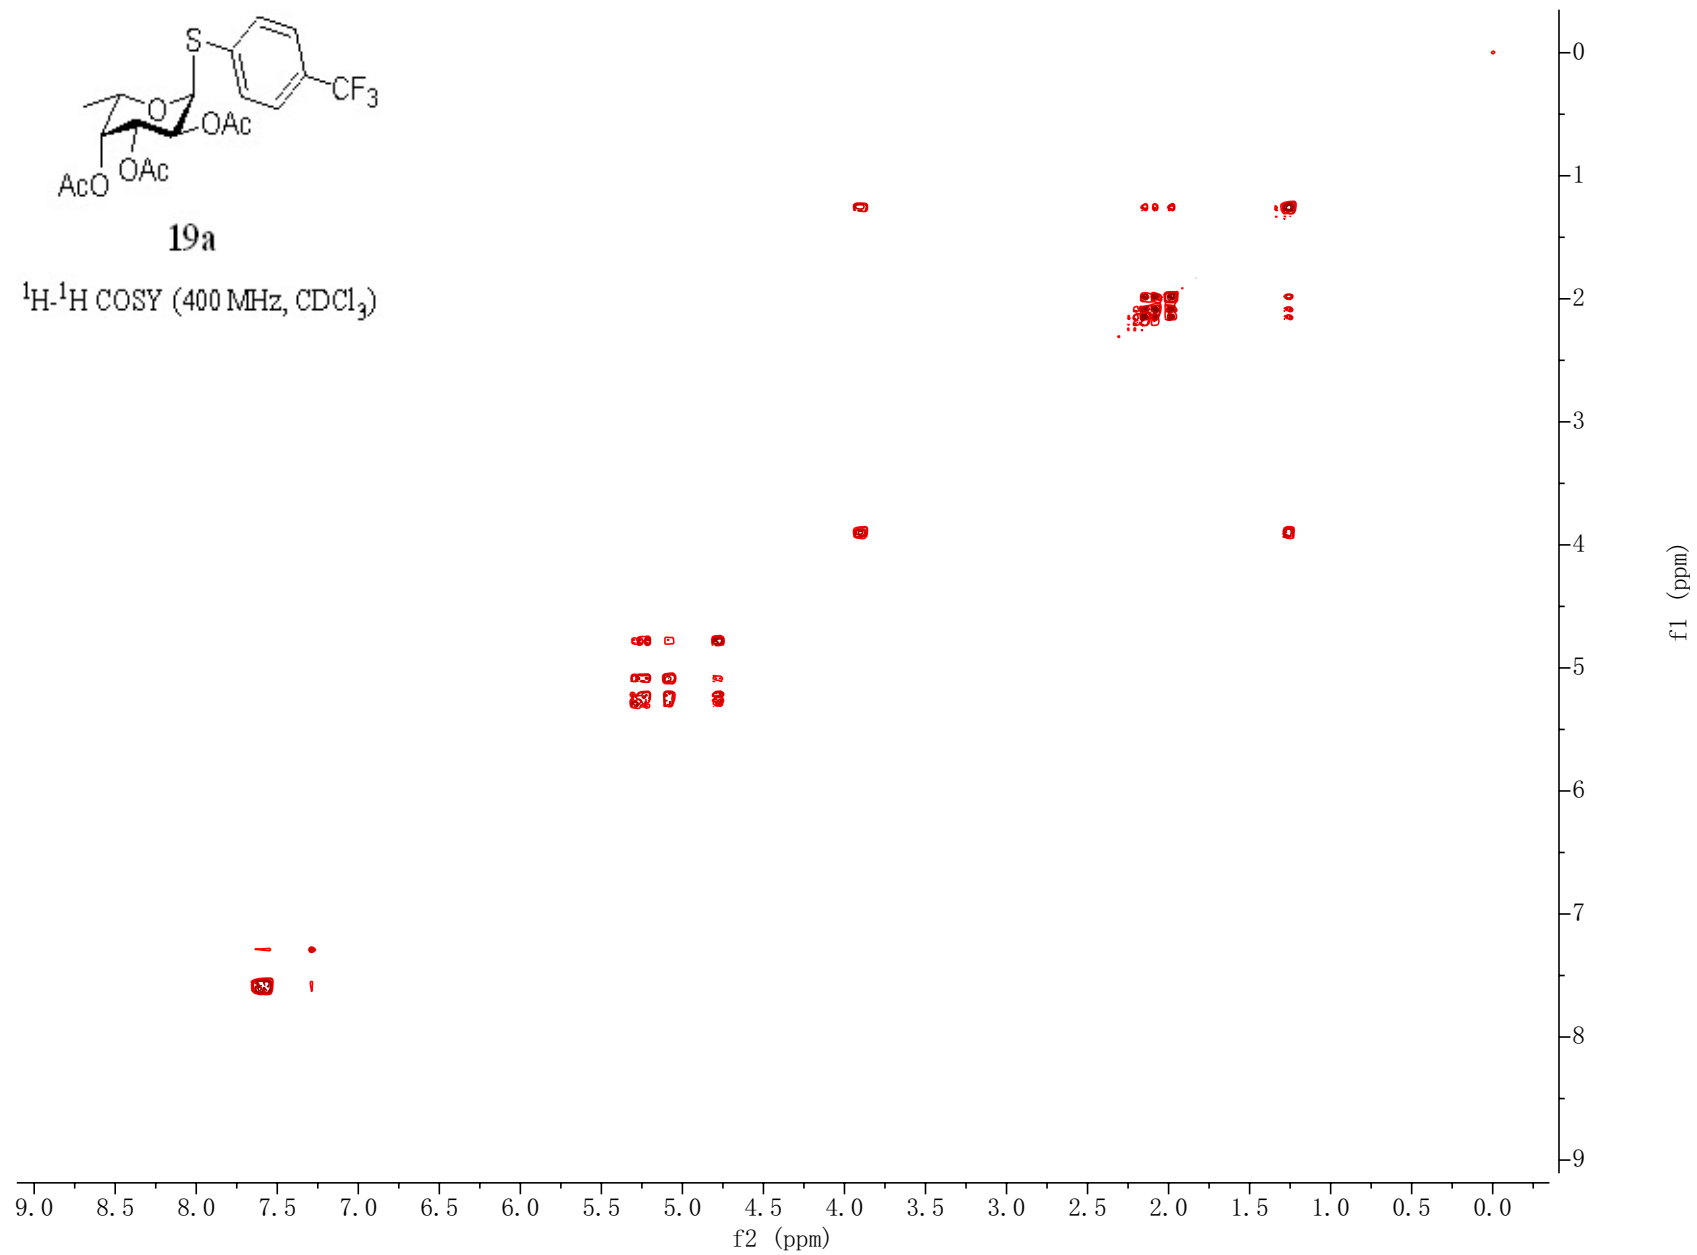

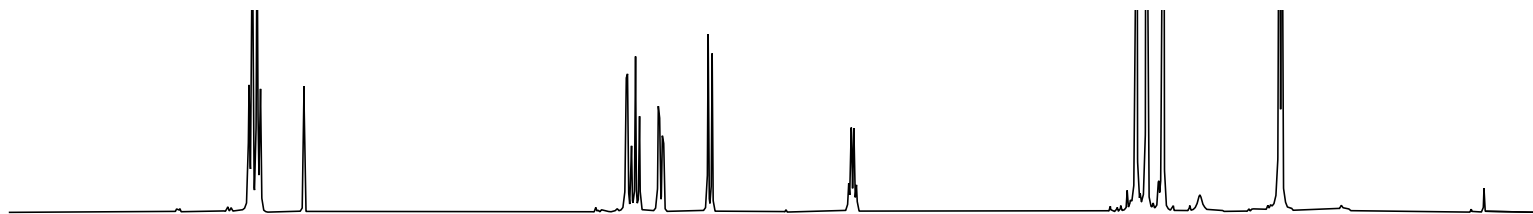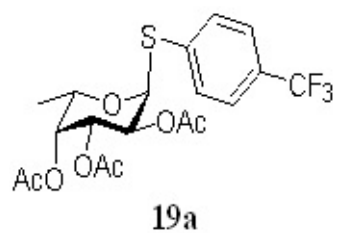

HMBC (400 MHz, CDCl<sub>3</sub>)

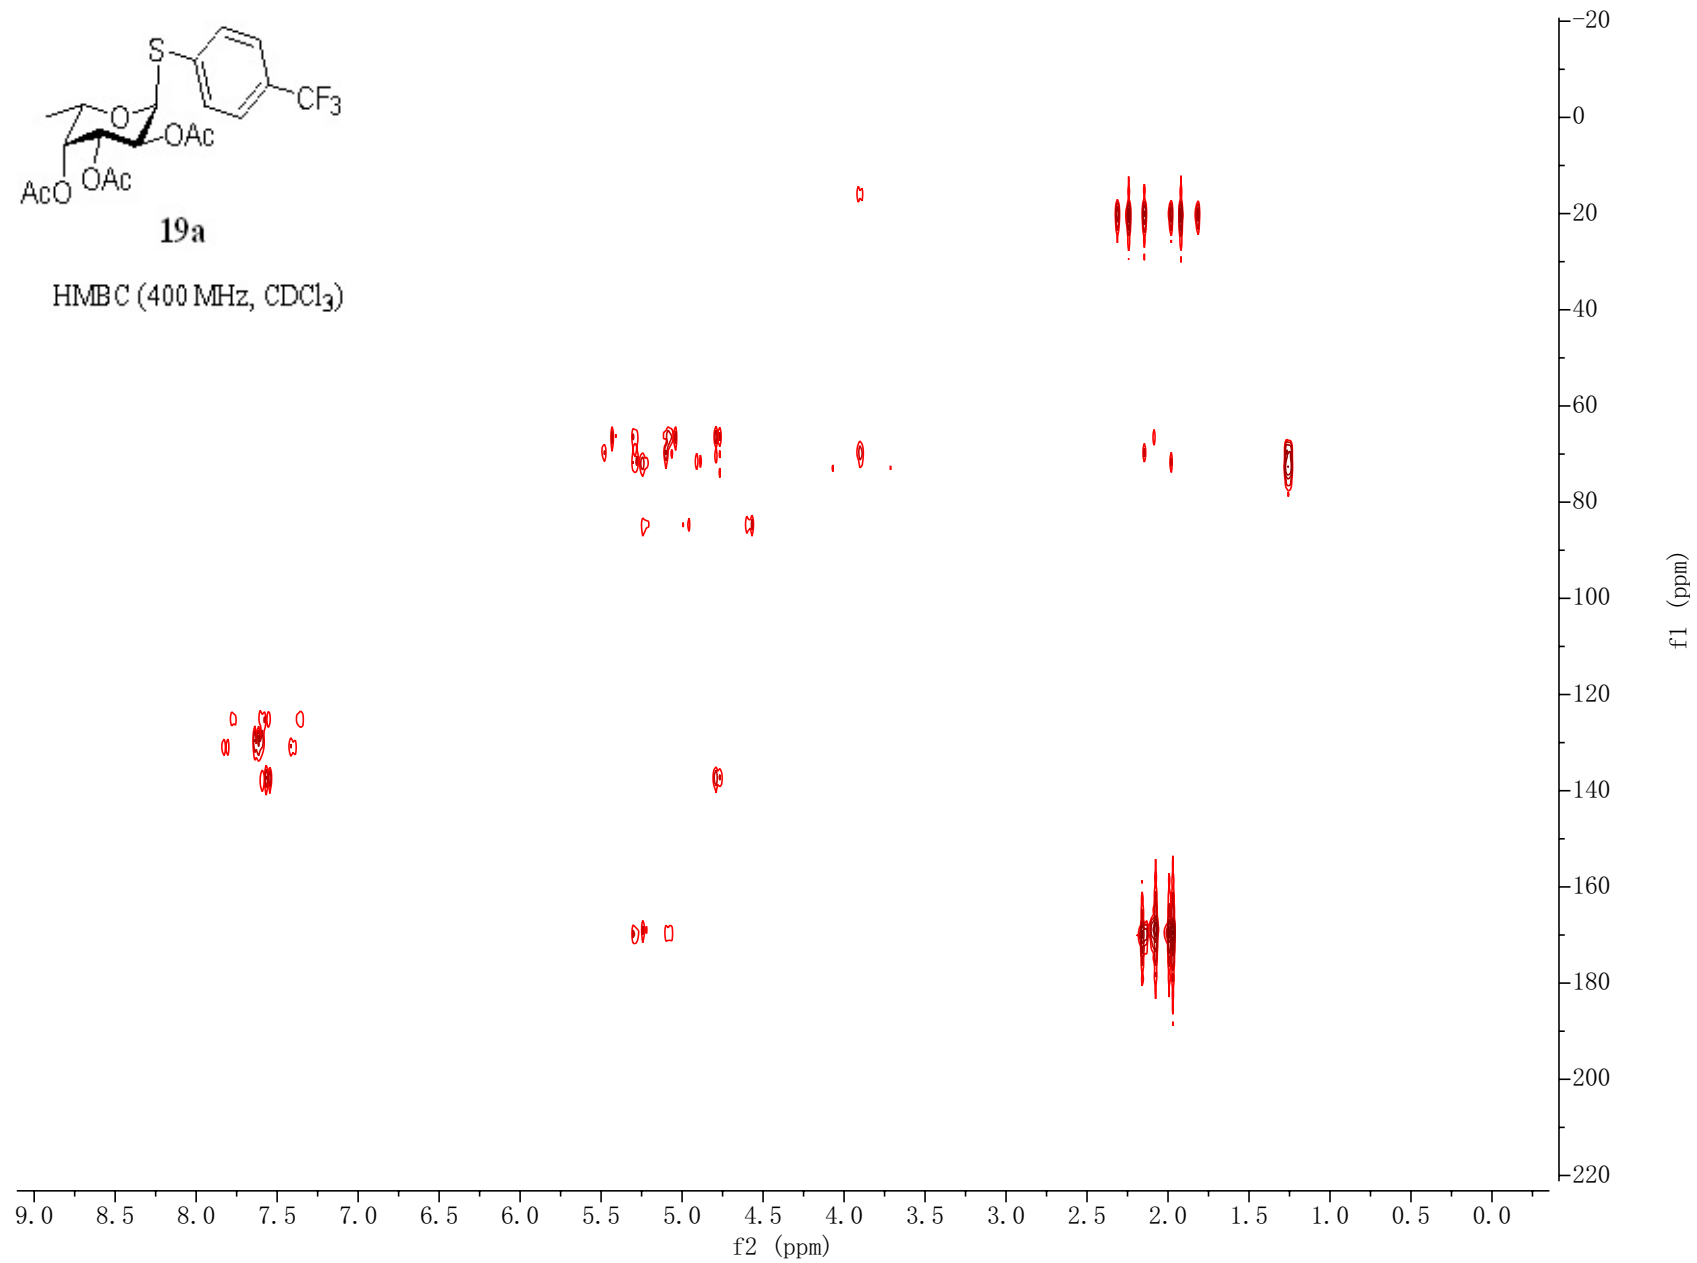



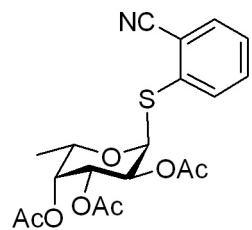

**19i**

$^1\text{H}$  NMR (400 MHz,  $\text{CDCl}_3$ )

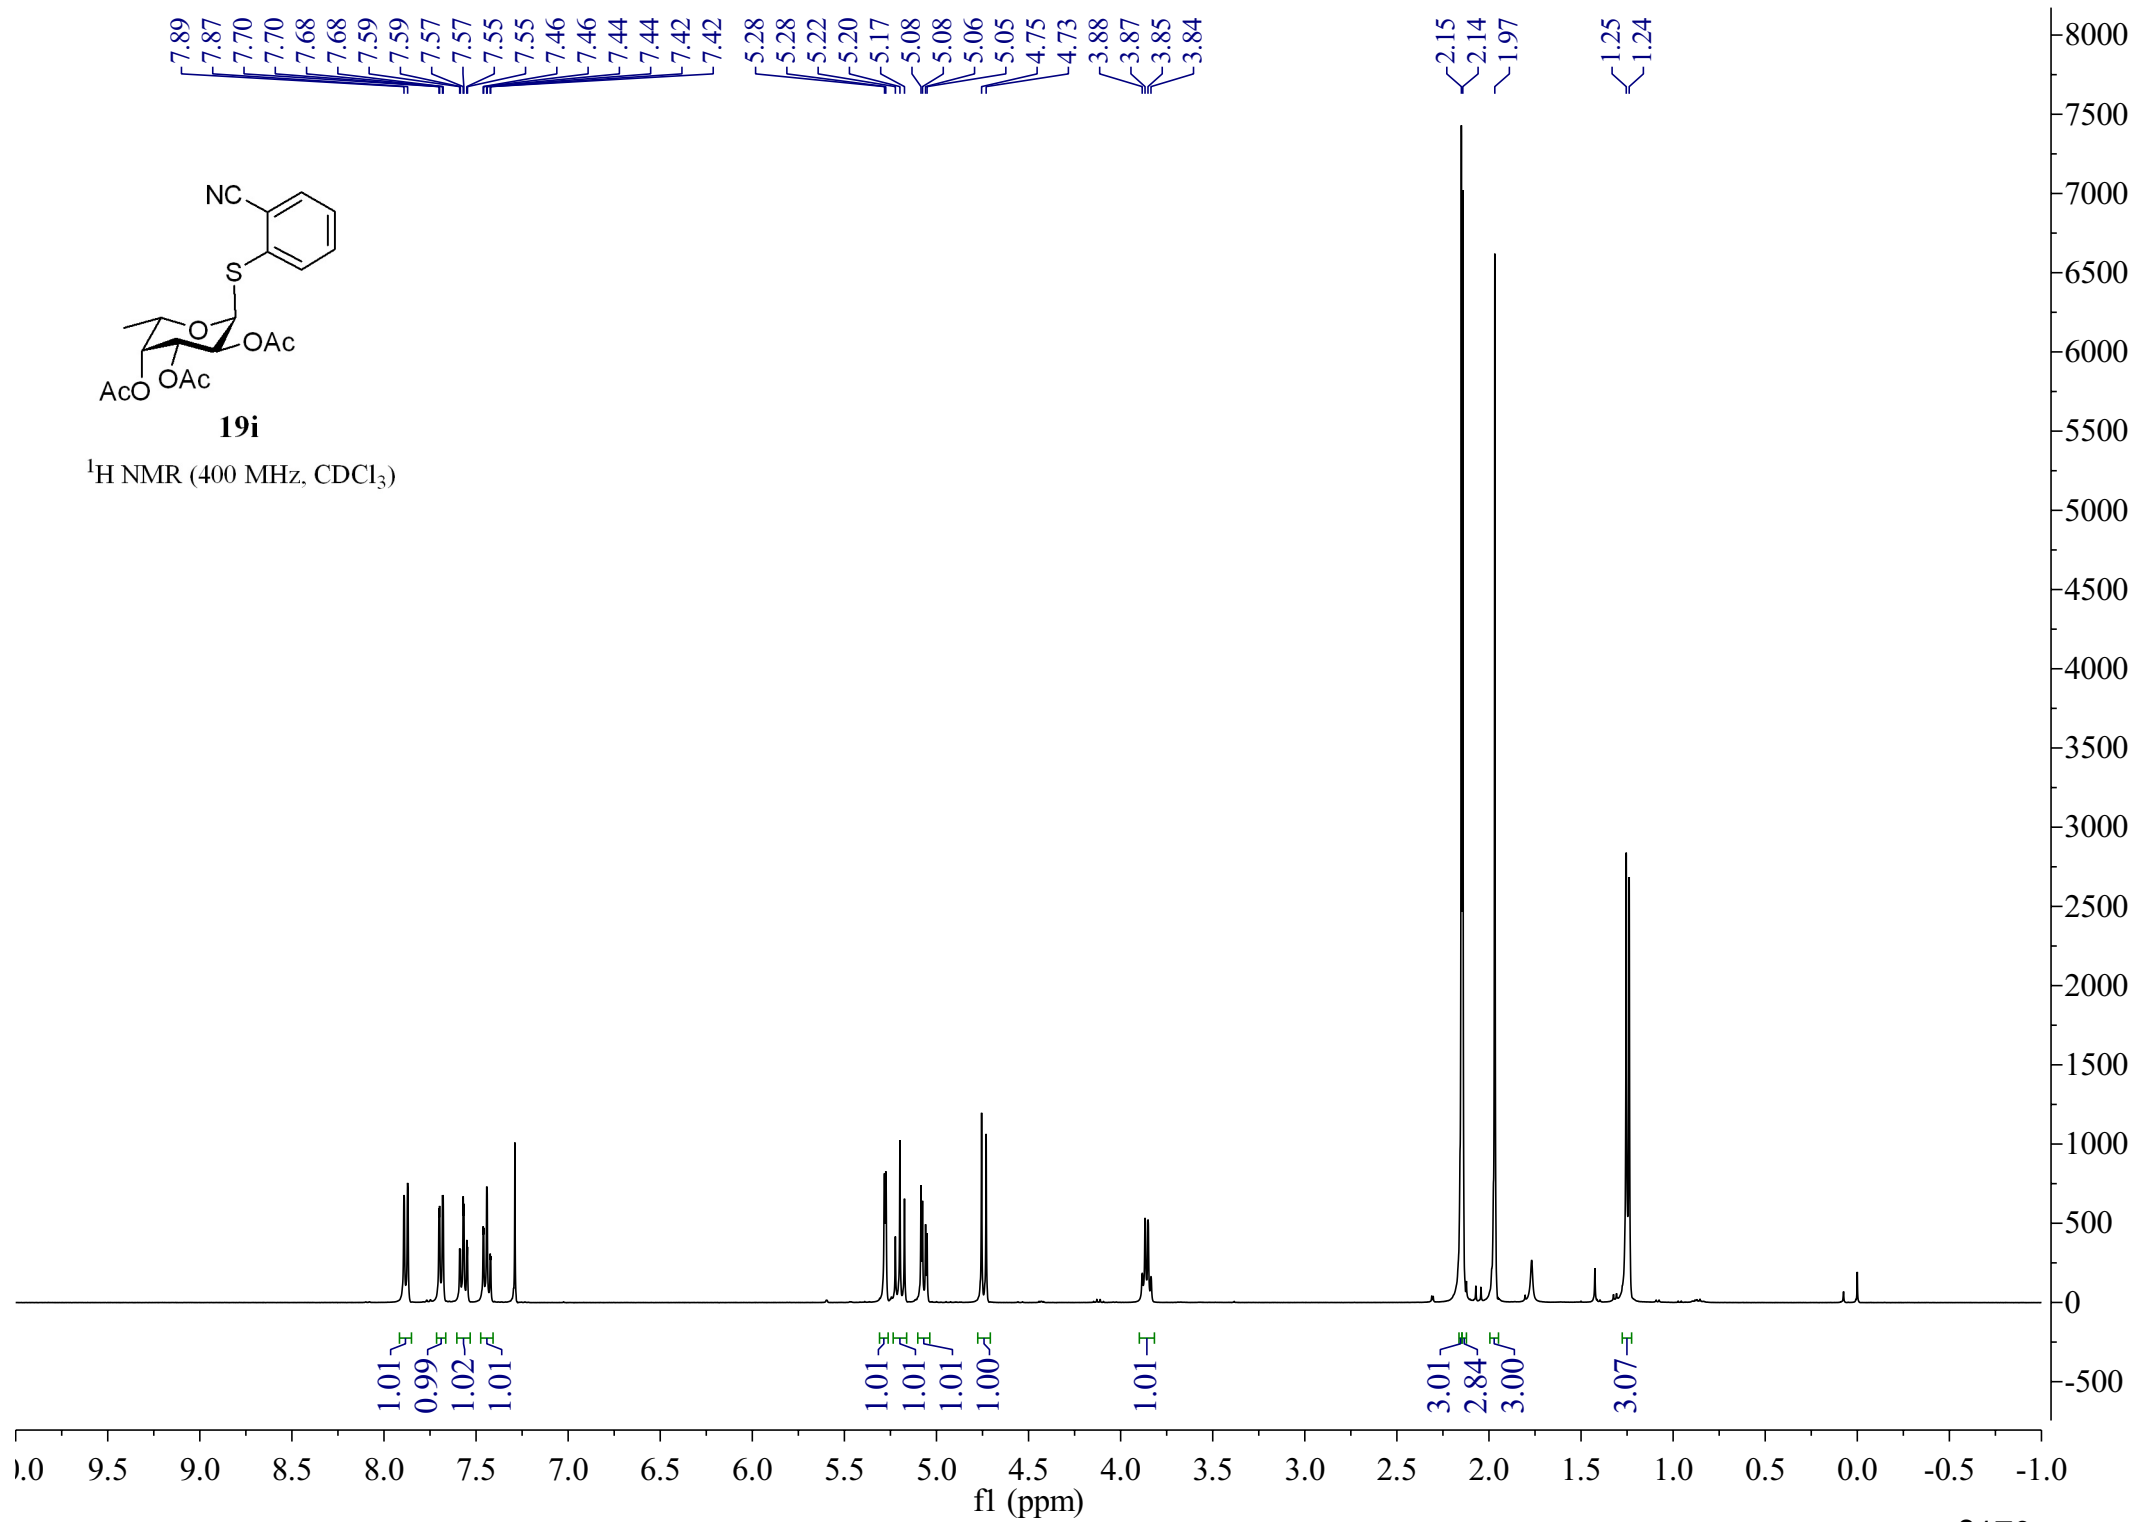

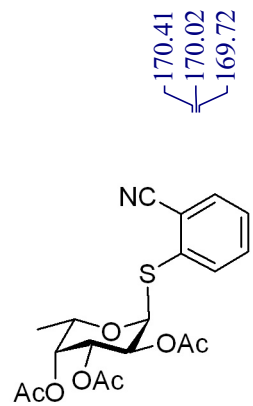

**19i**

$^{13}\text{C}\{^1\text{H}\}$  NMR (100 MHz,  $\text{CDCl}_3$ )

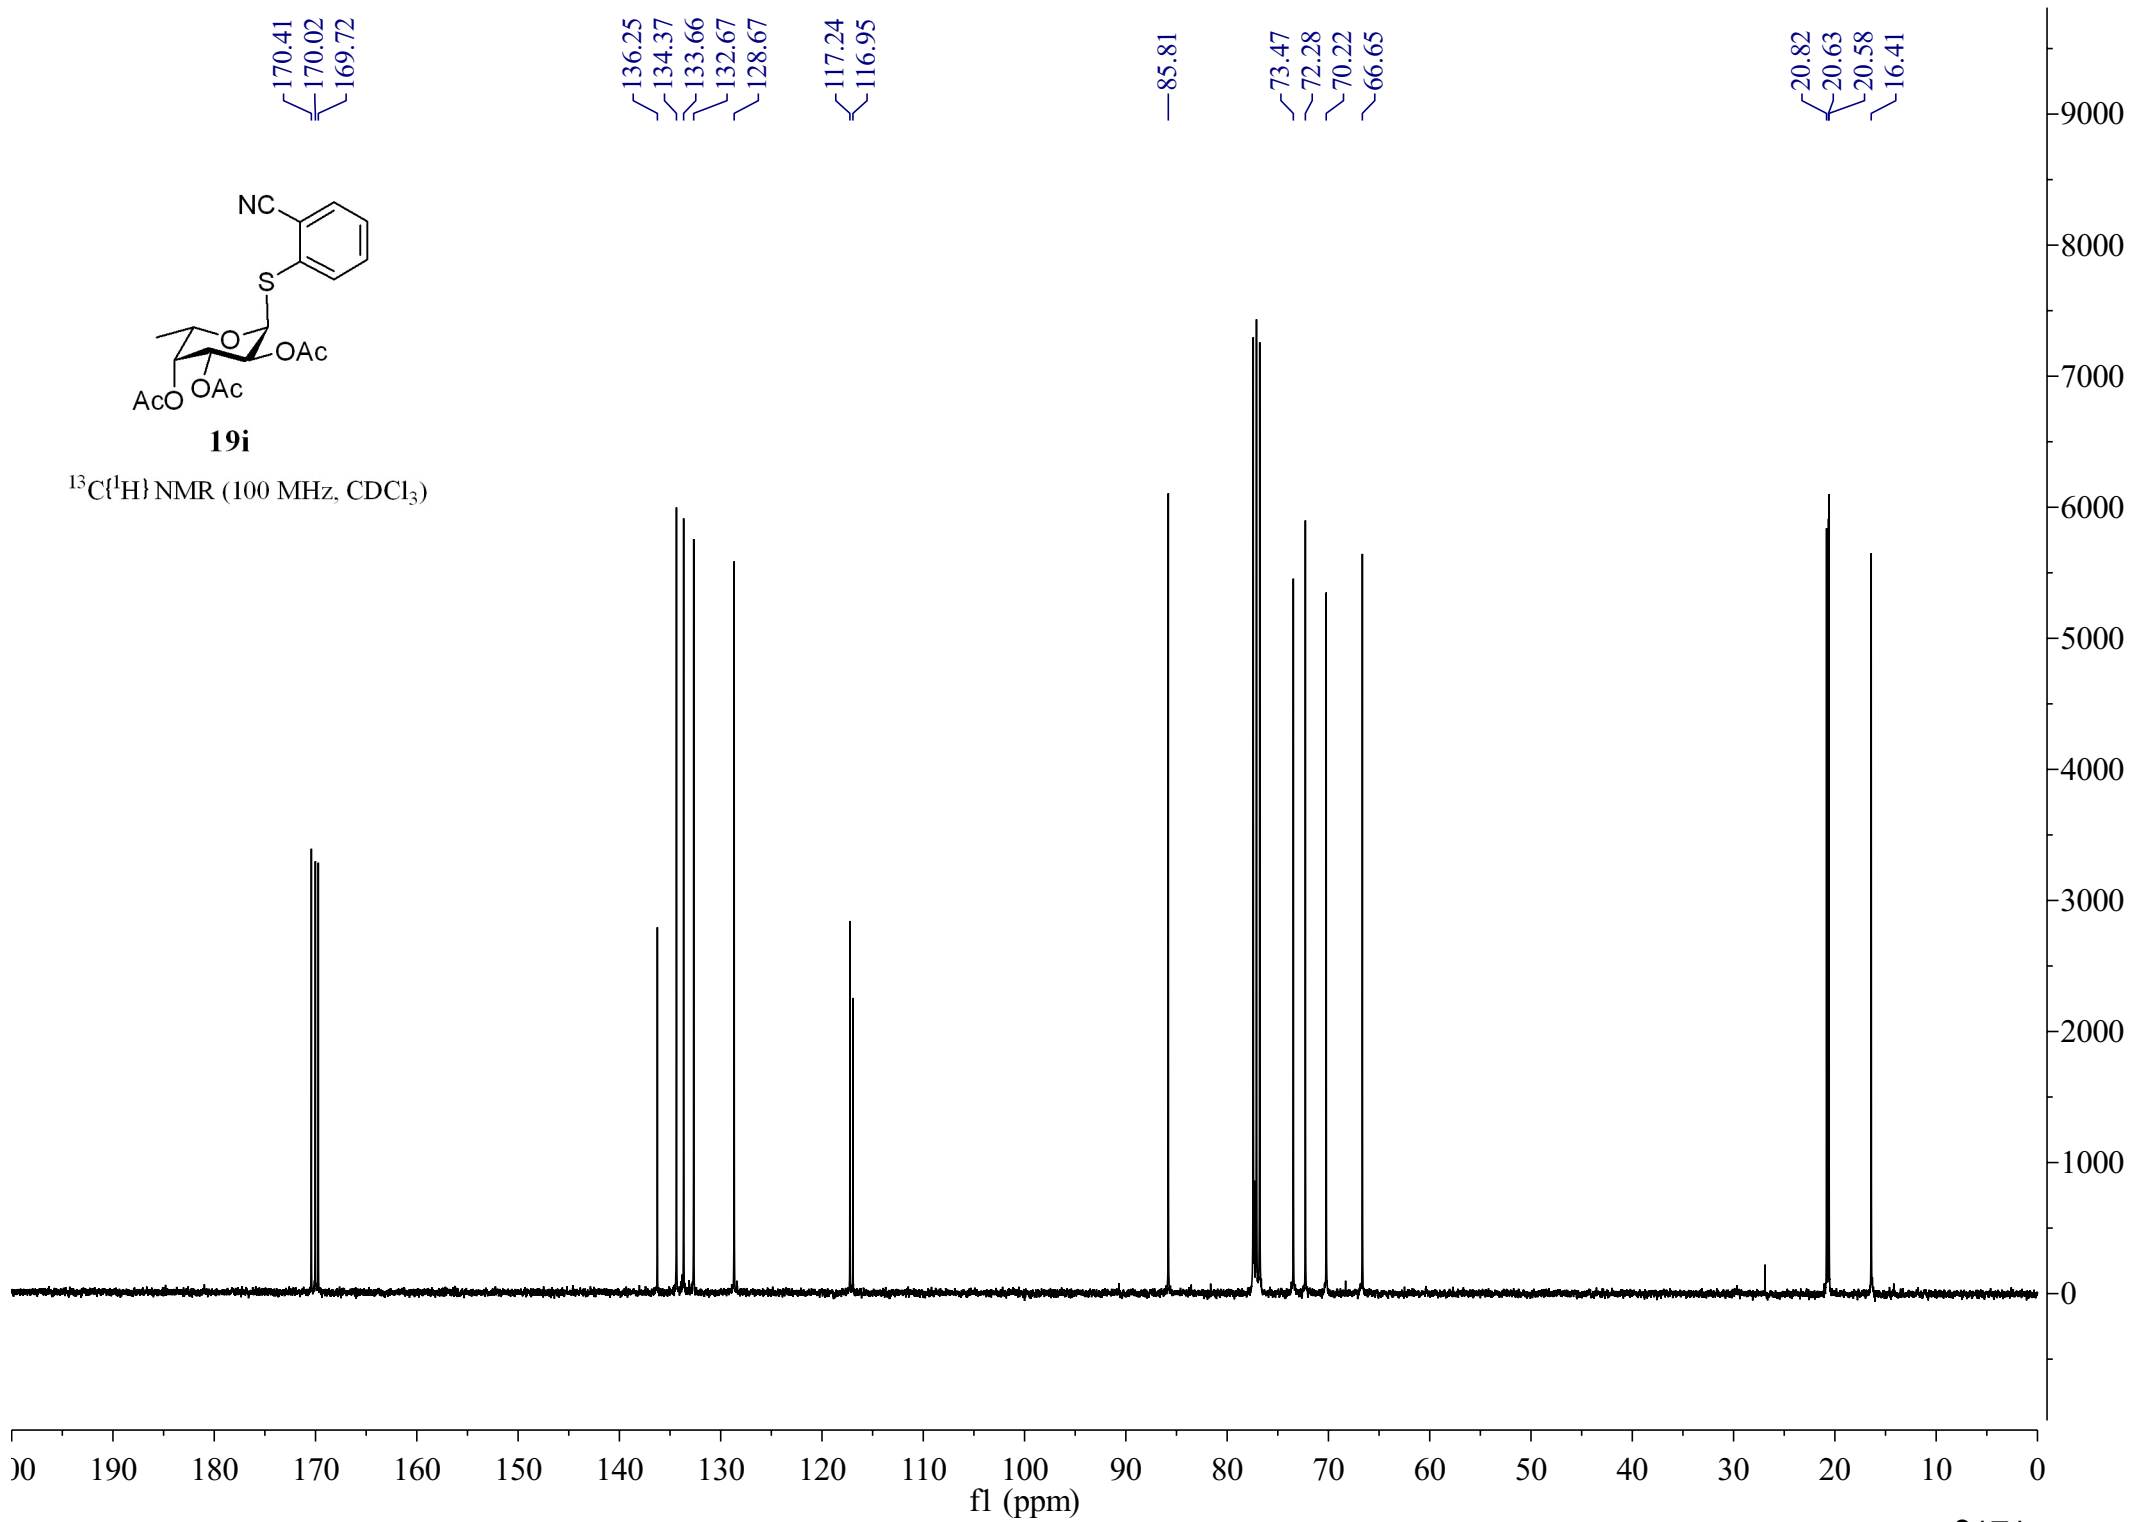

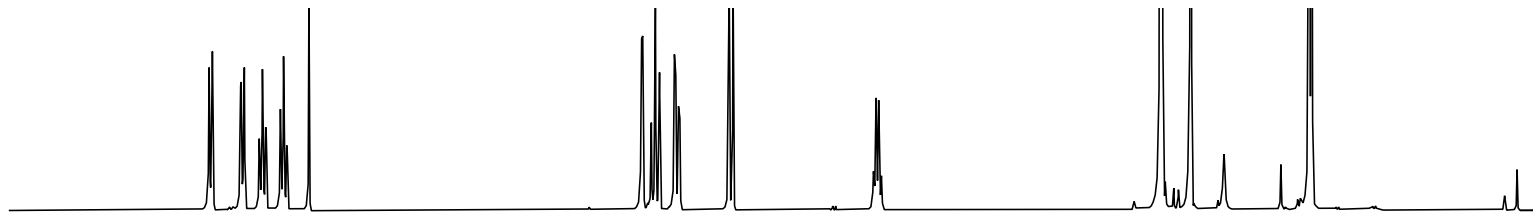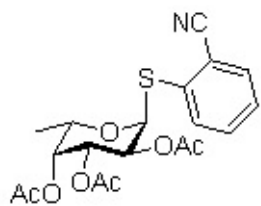

**19i**

$^1\text{H}$ - $^1\text{H}$  COSY (400 MHz,  $\text{CDCl}_3$ )

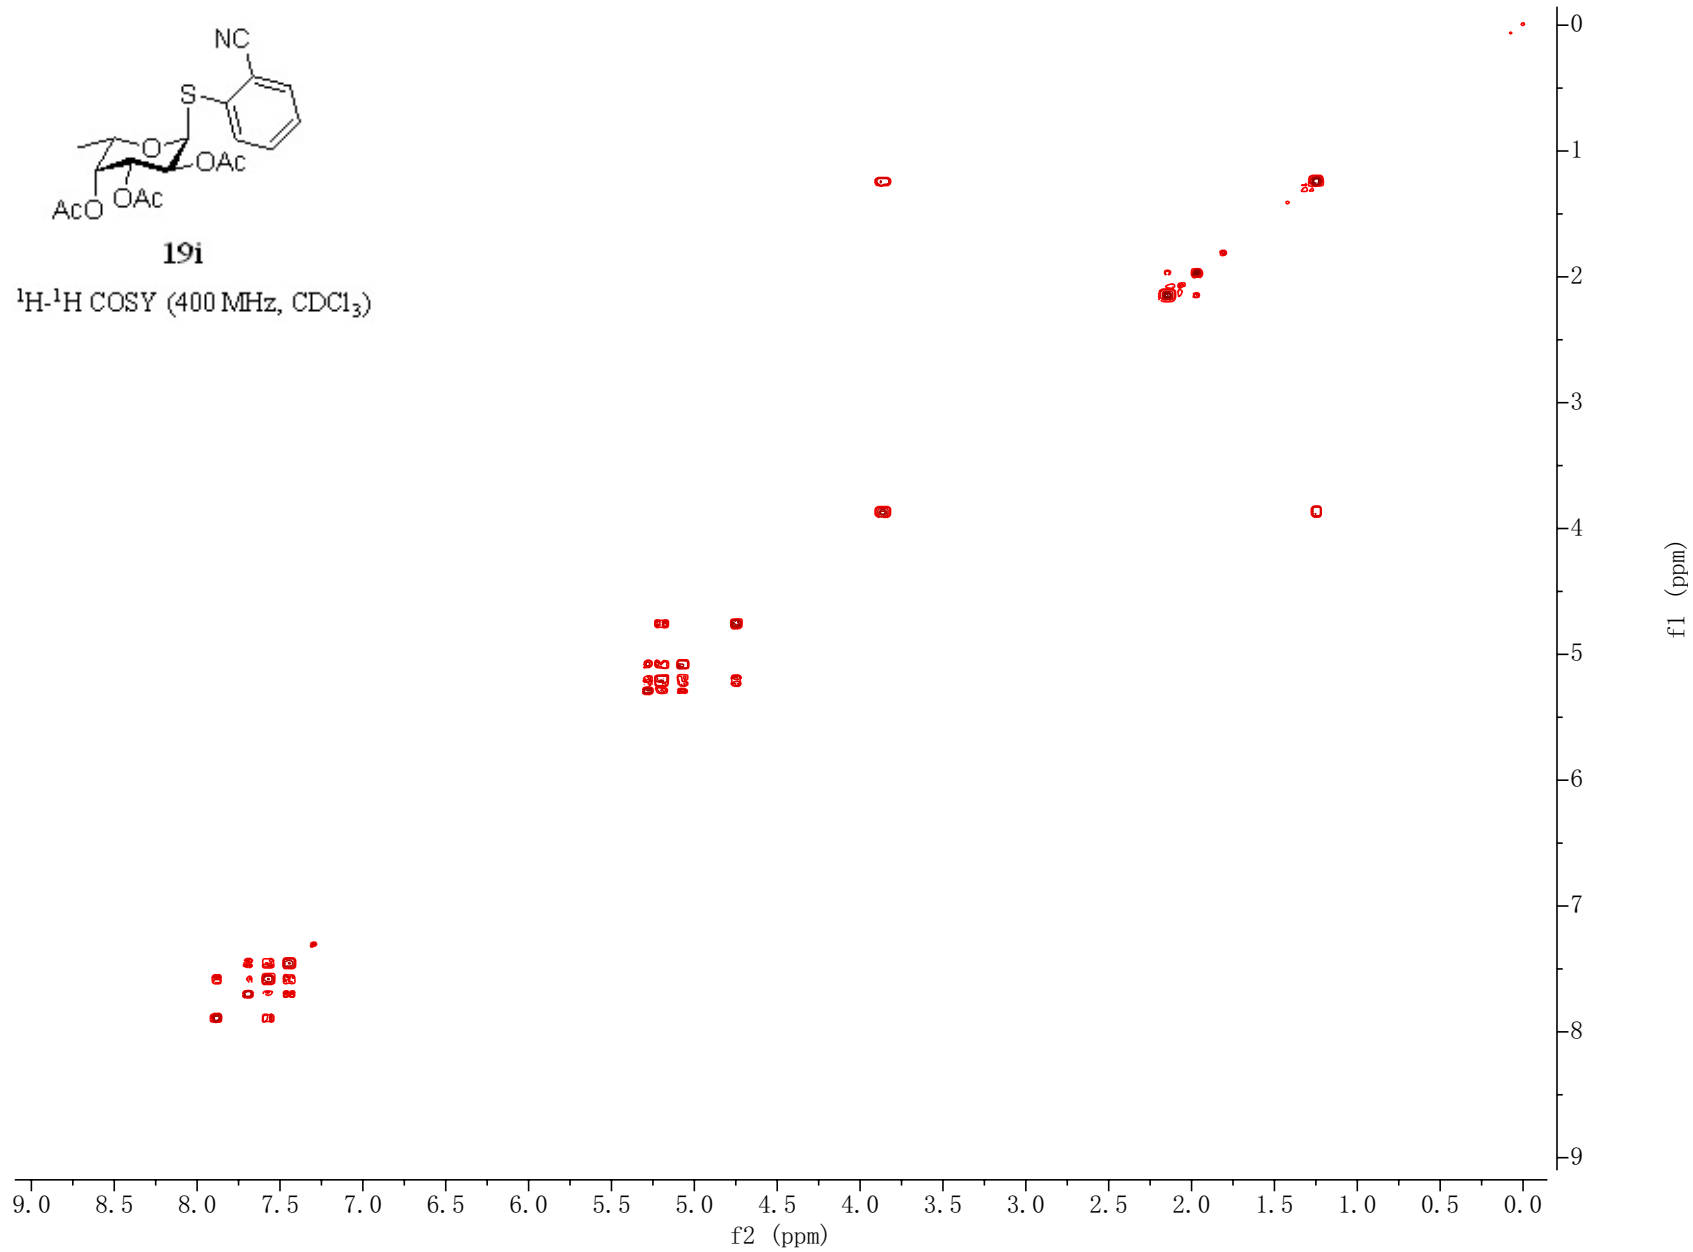

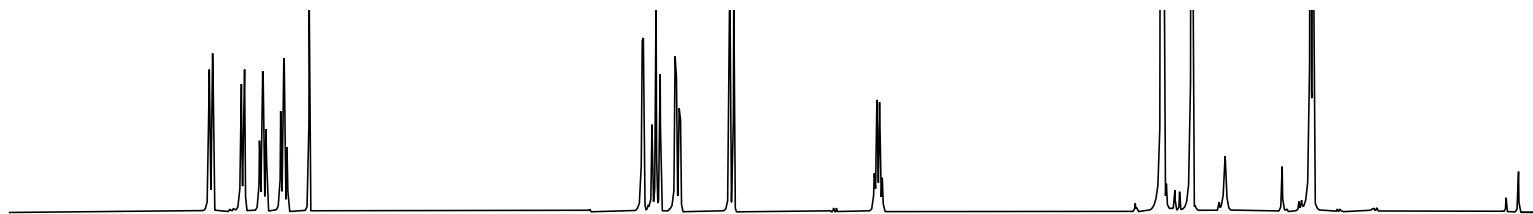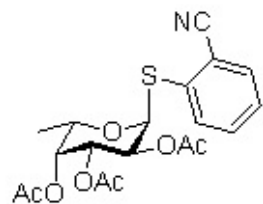

19i

HSQC (400 MHz, CDCl<sub>3</sub>)

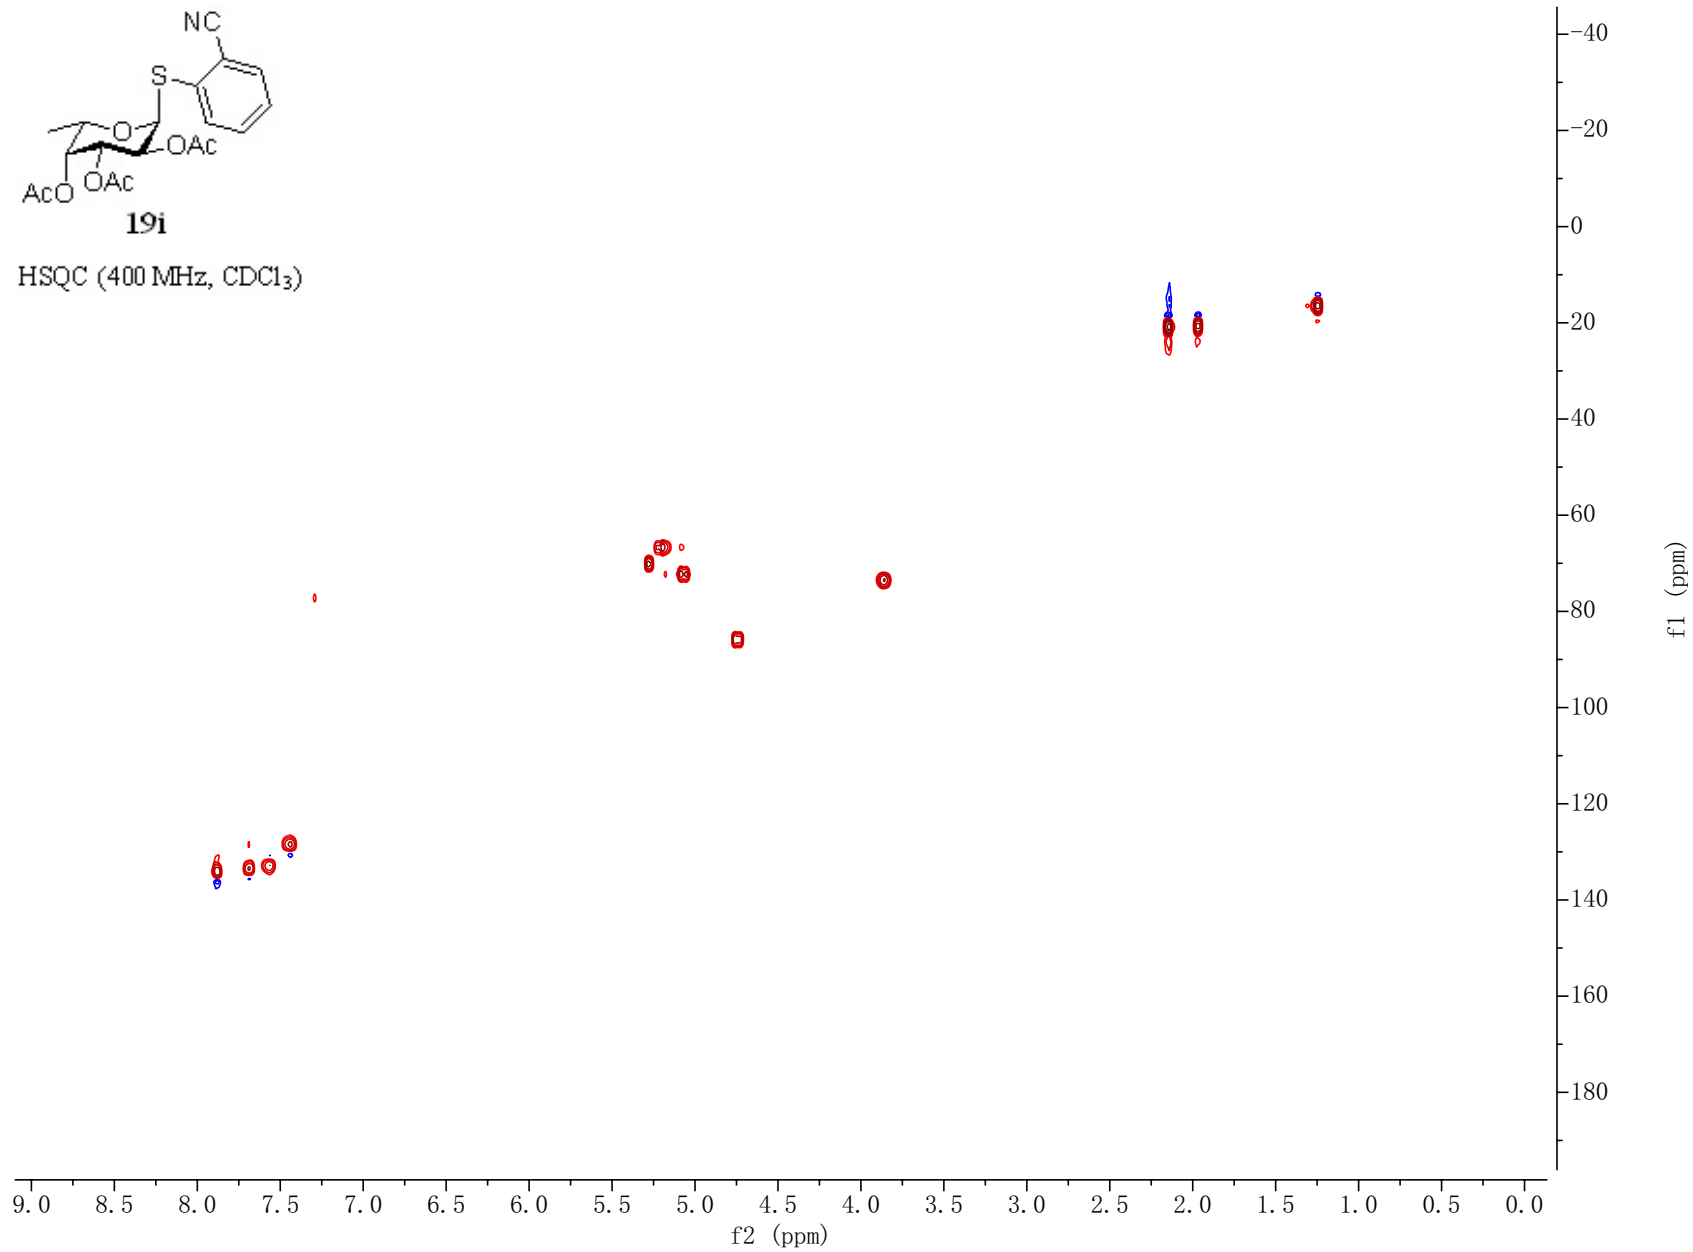

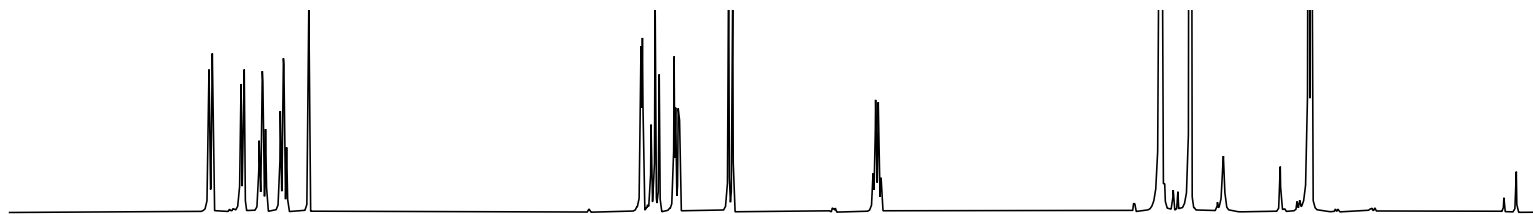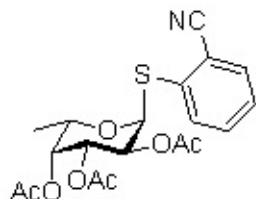

19i

HMBC (400 MHz, CDCl<sub>3</sub>)

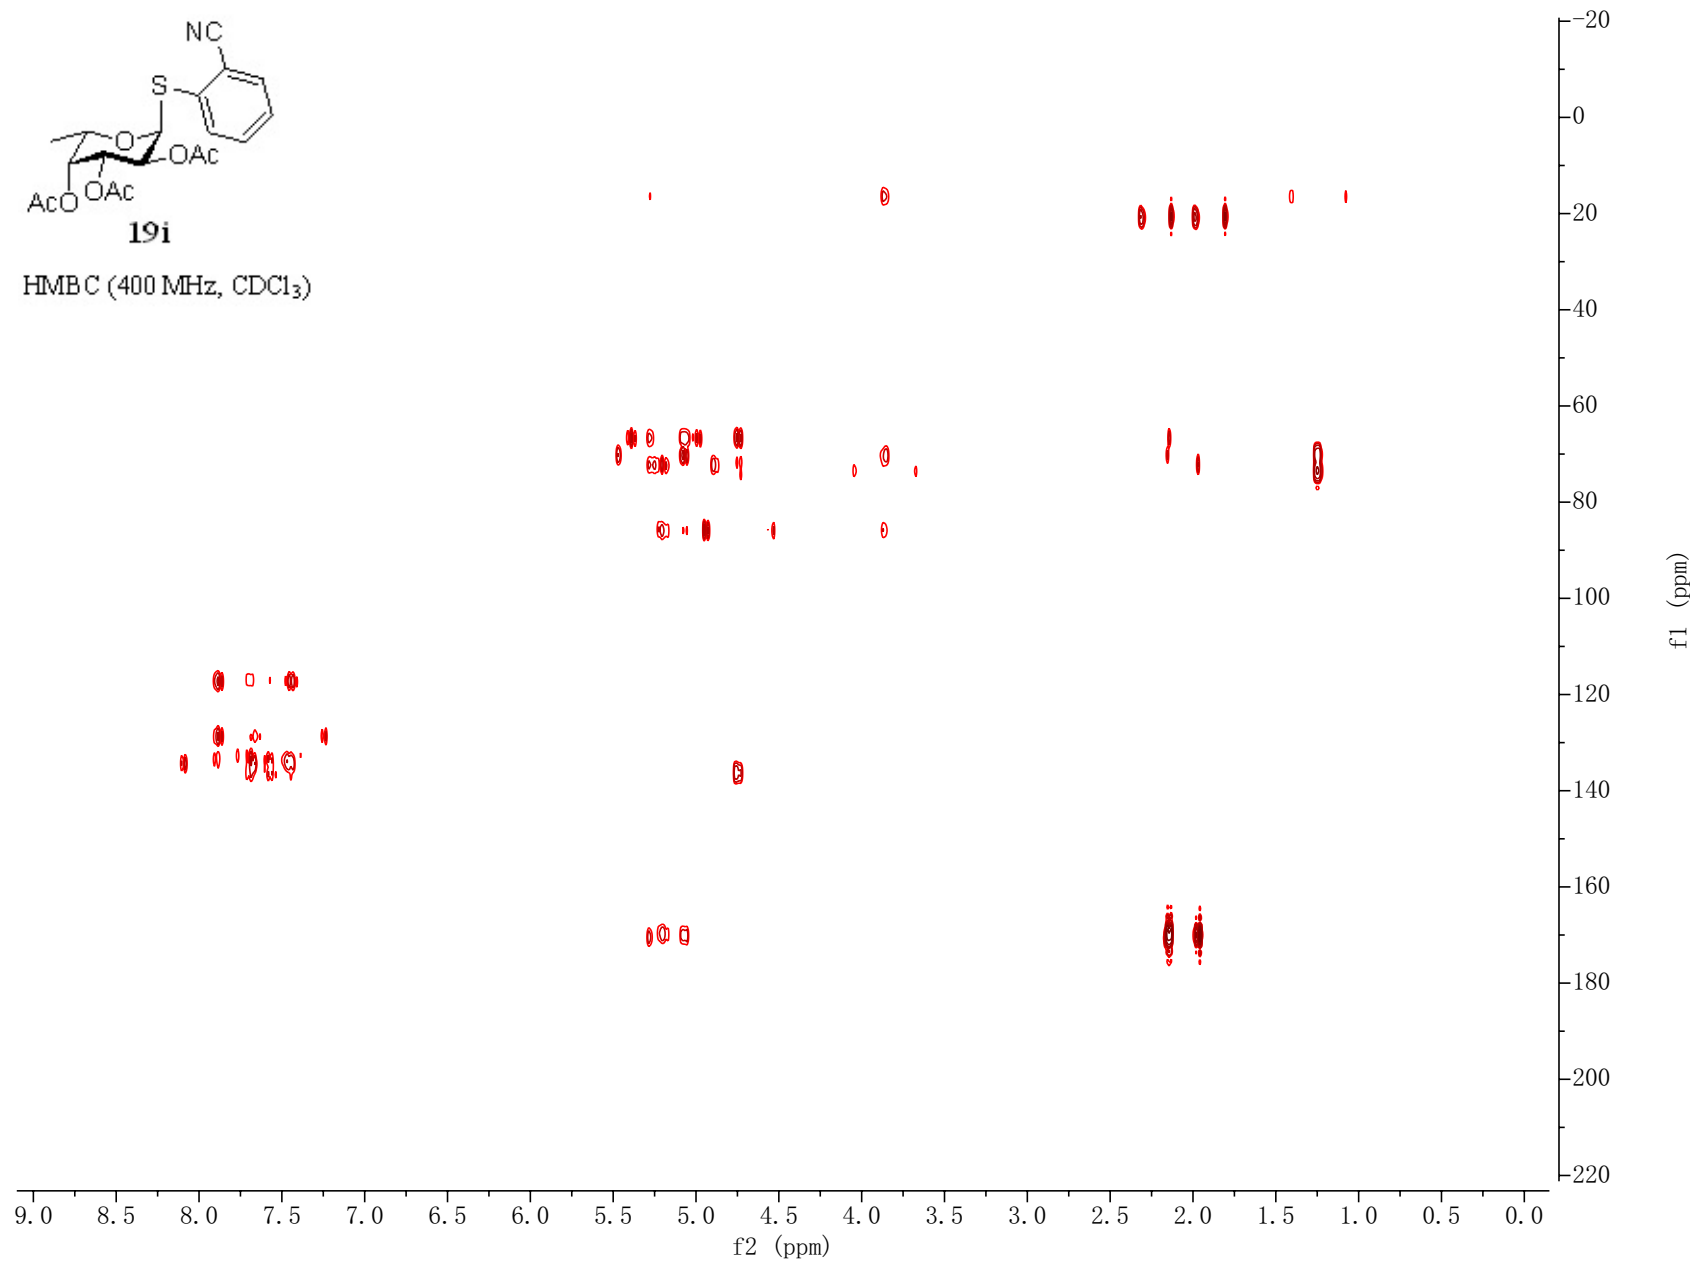

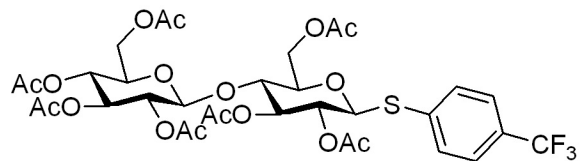

**20a**

<sup>1</sup>H NMR (400 MHz, CDCl<sub>3</sub>)

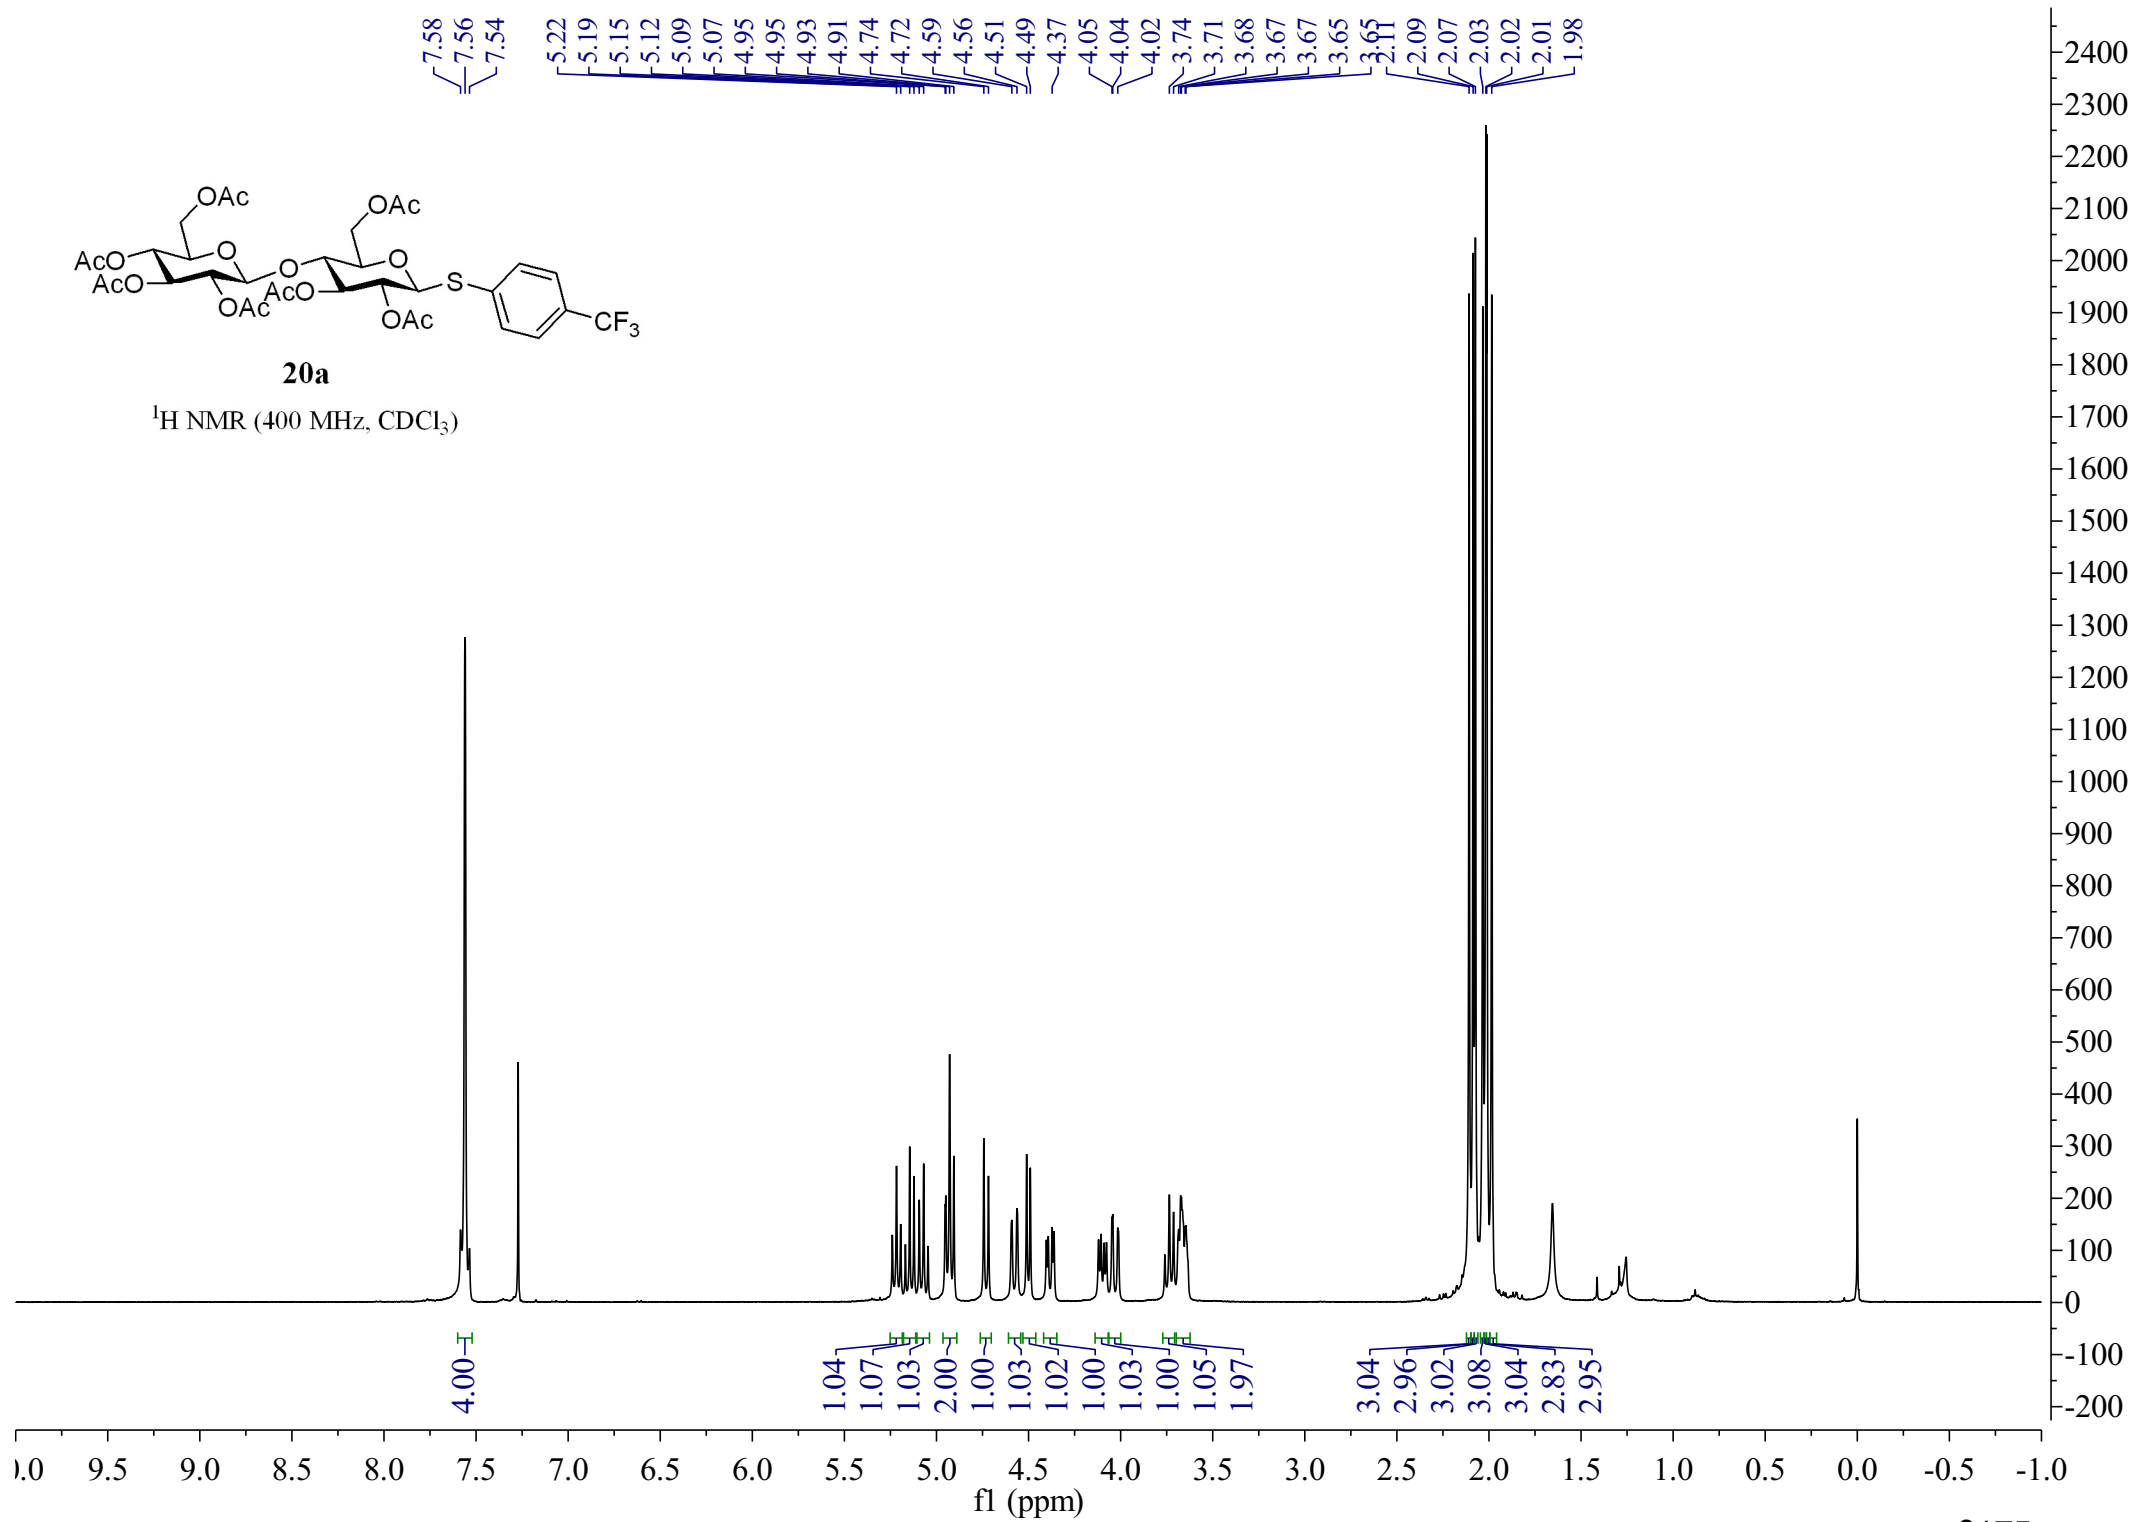

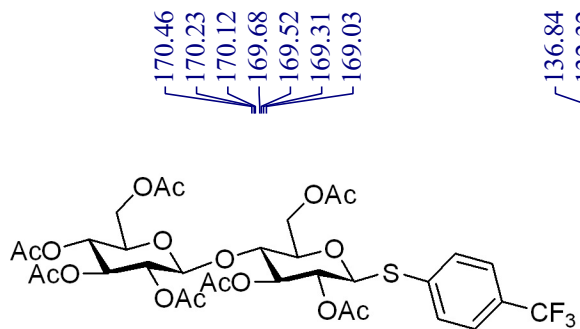

**20a**

$^{13}\text{C}\{^1\text{H}\}$  NMR (100 MHz,  $\text{CDCl}_3$ )

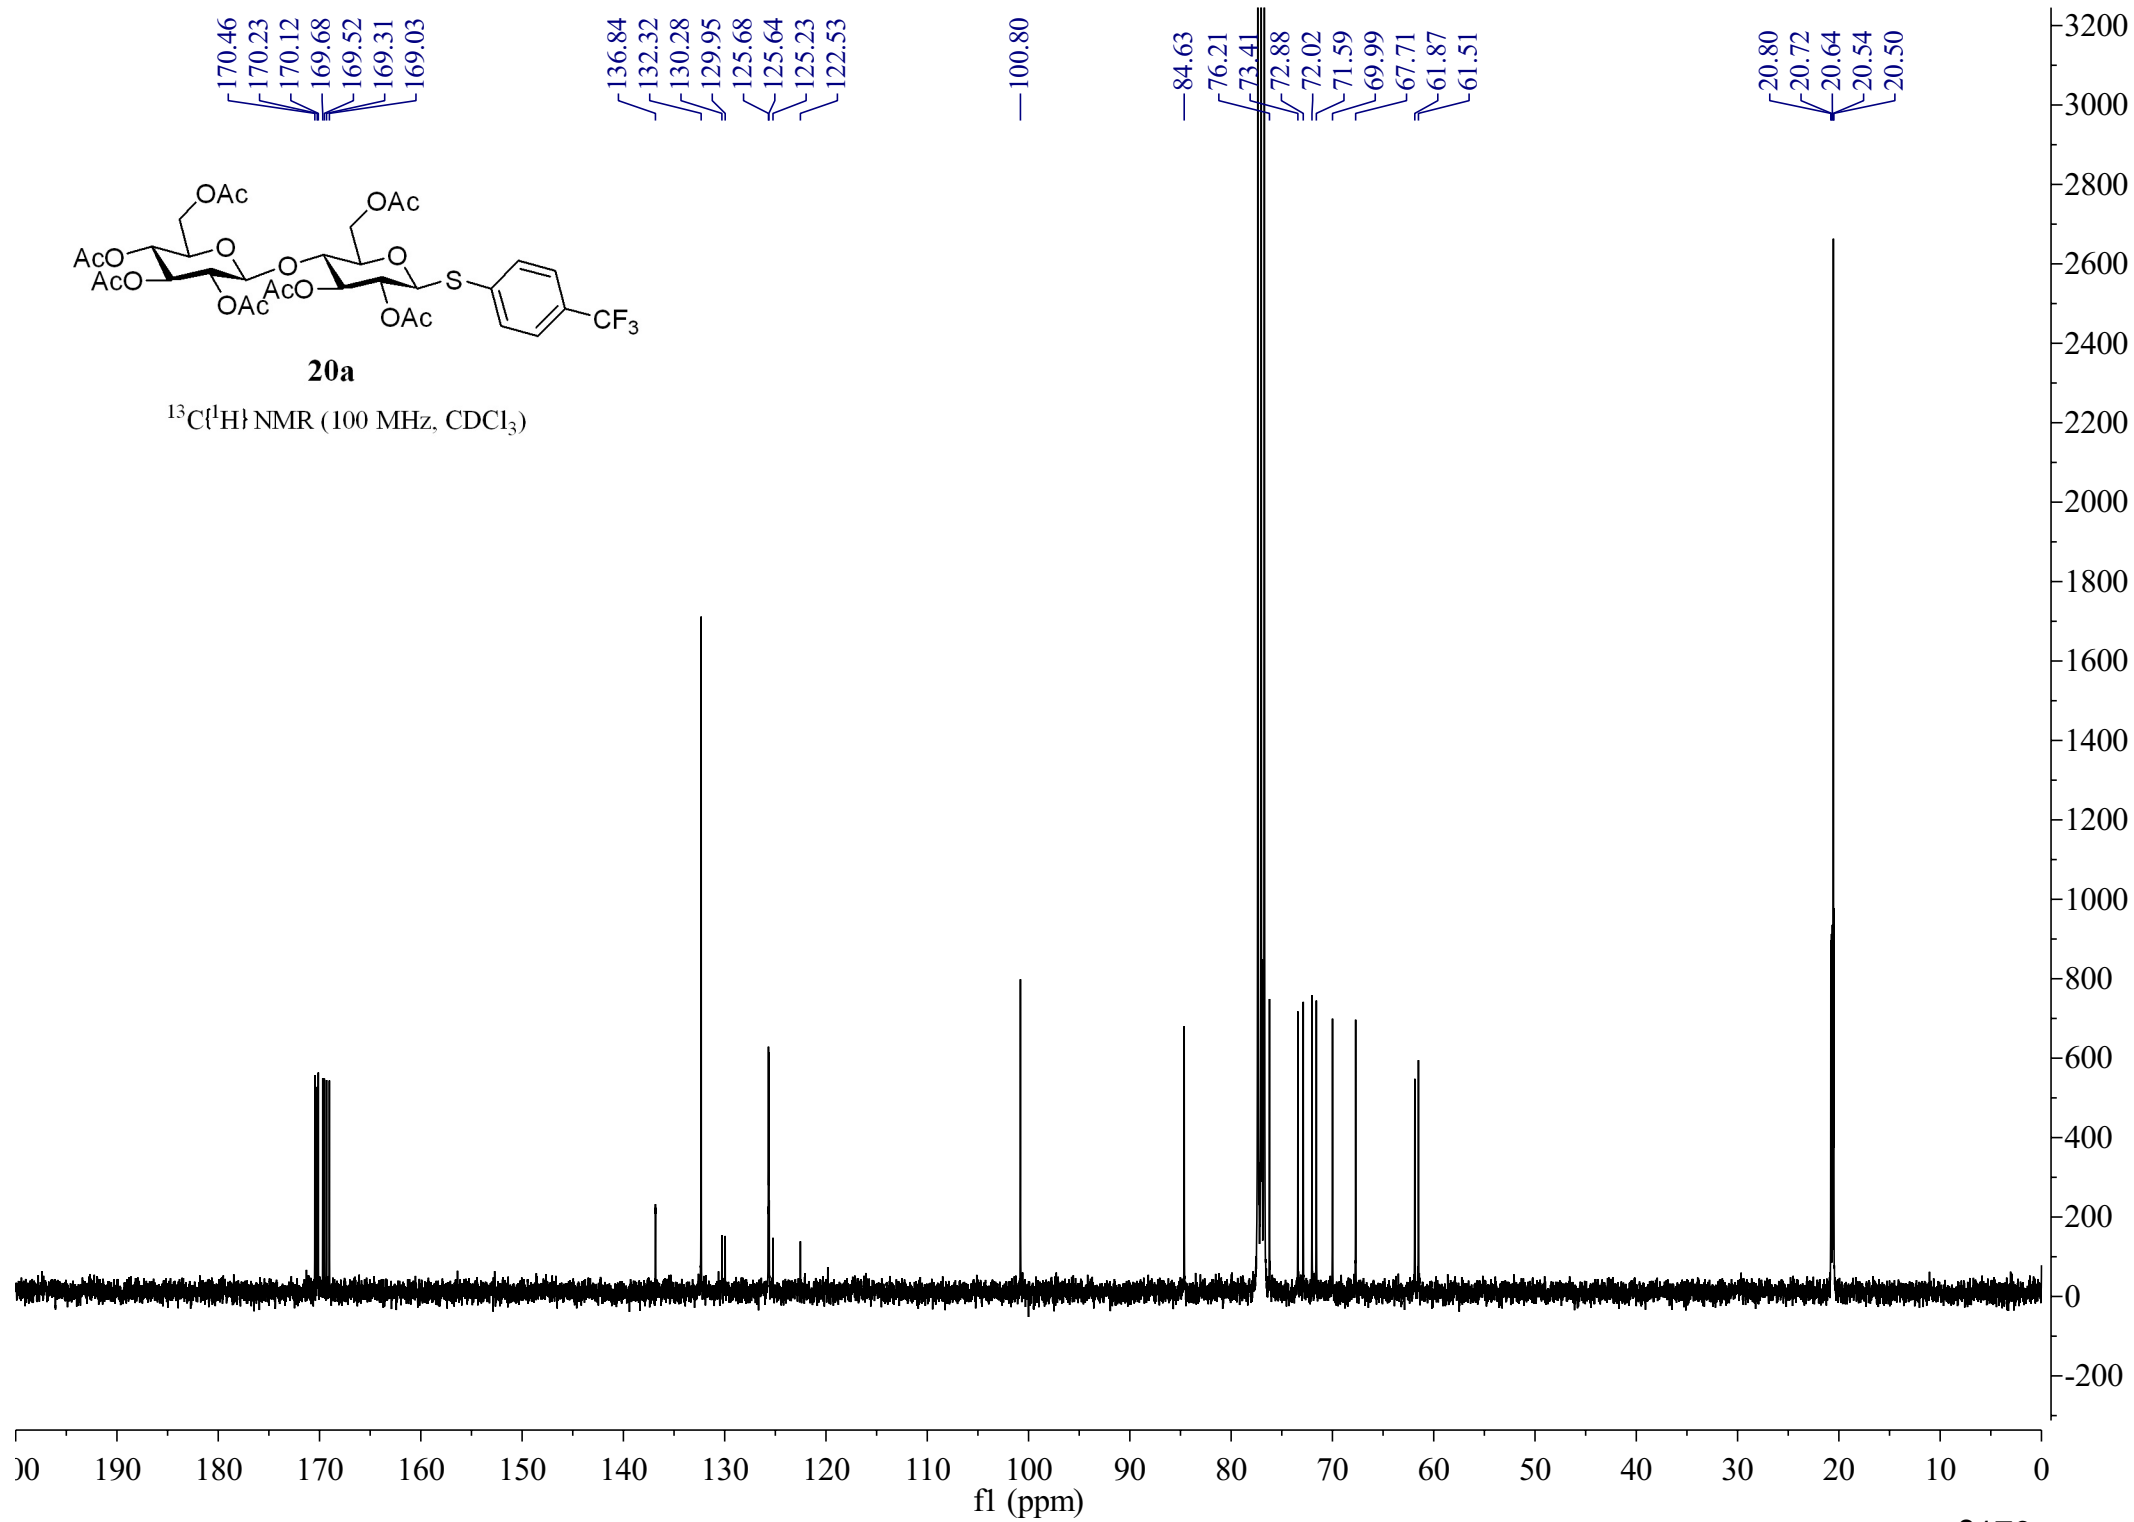

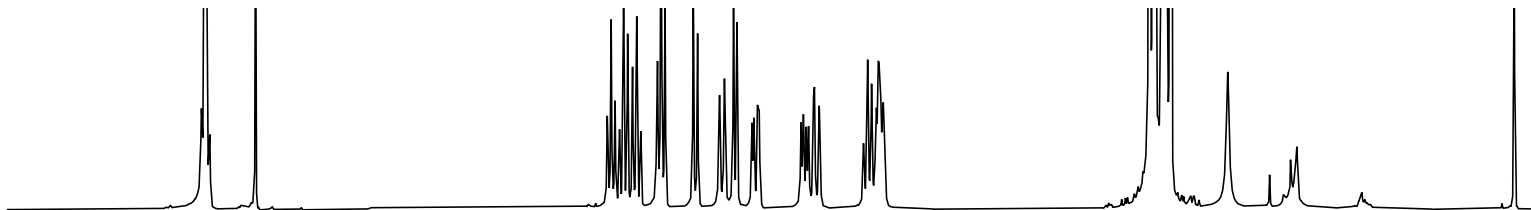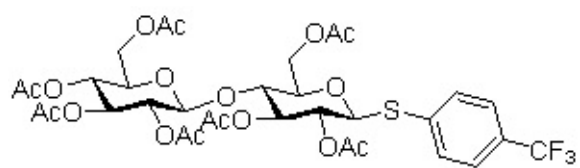

20a

$^1\text{H}$ - $^1\text{H}$  COSY (400 MHz,  $\text{CDCl}_3$ )

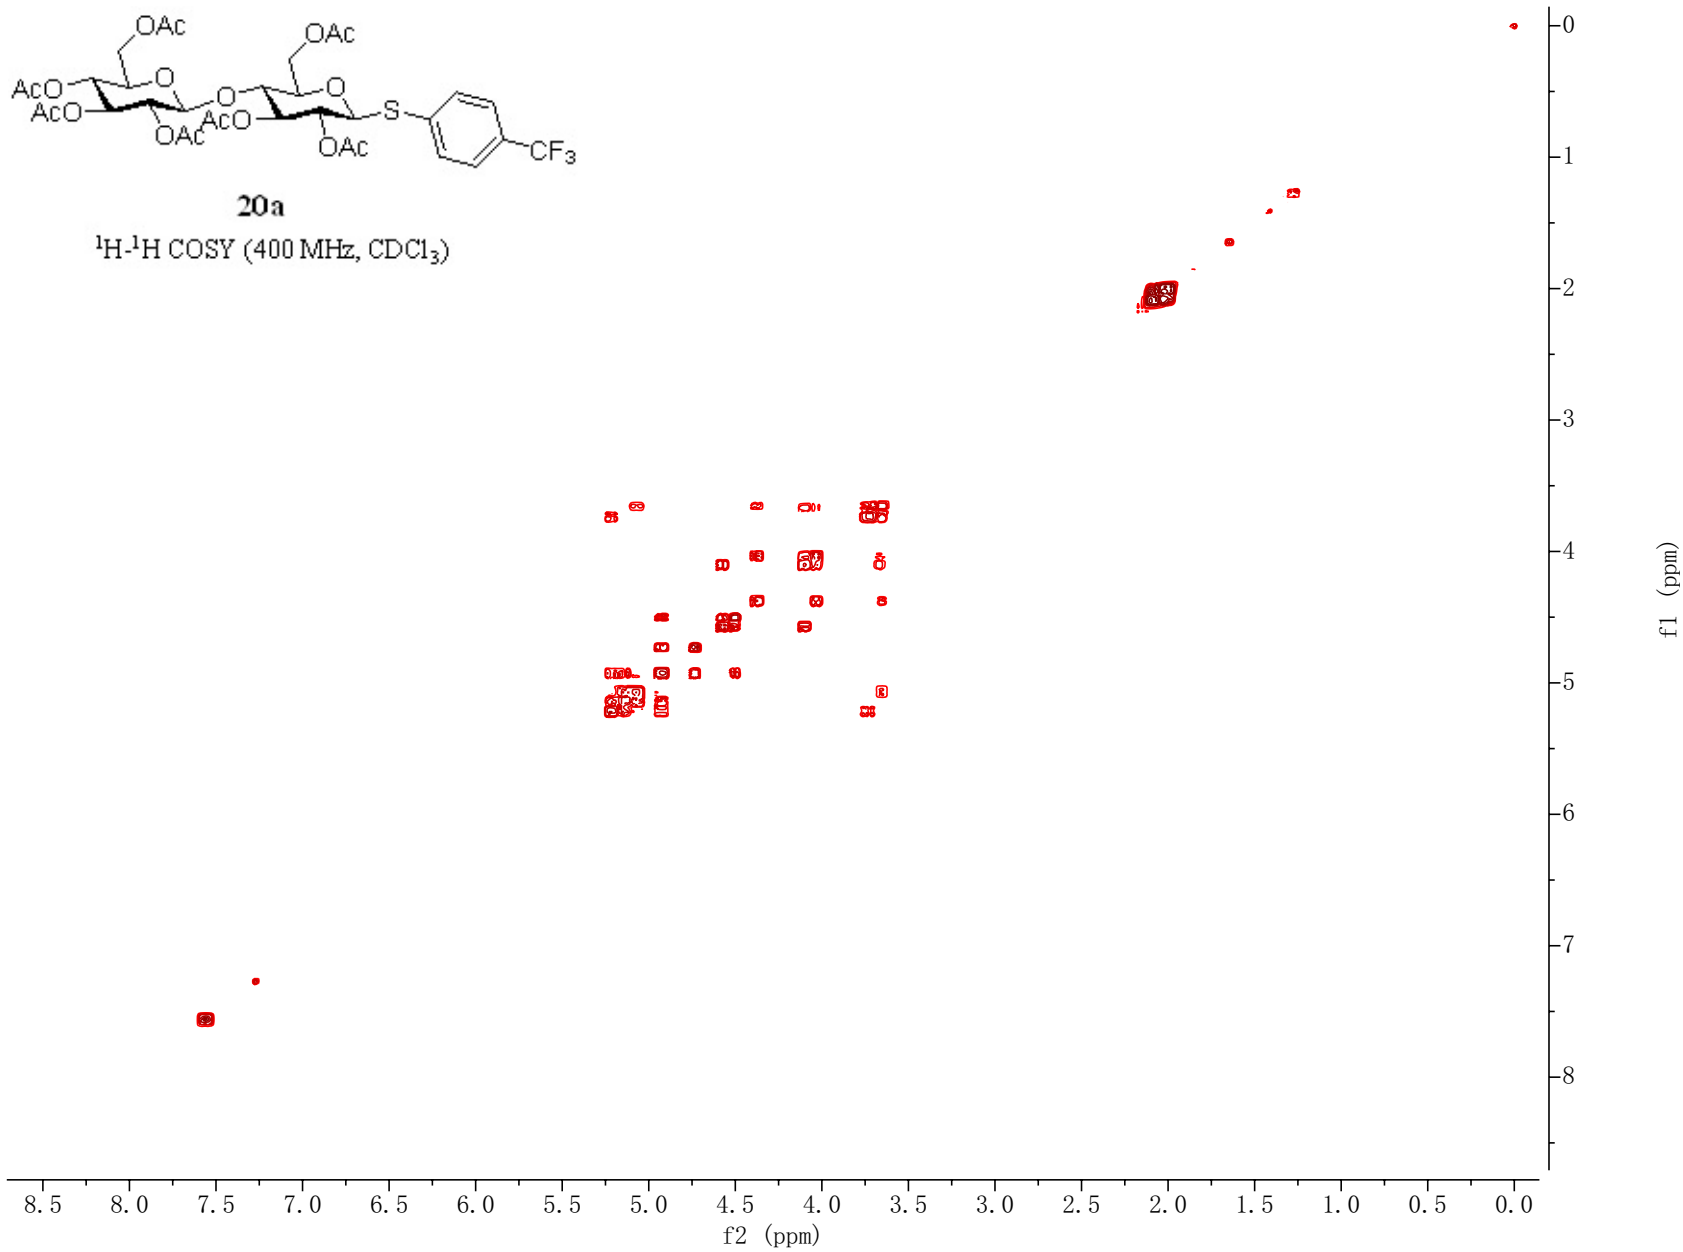



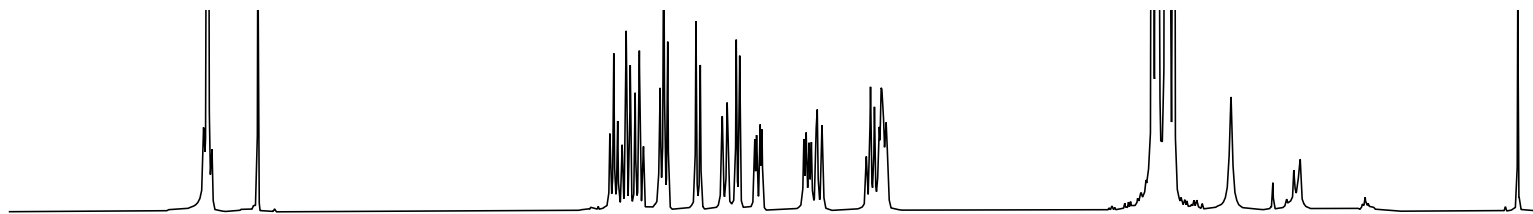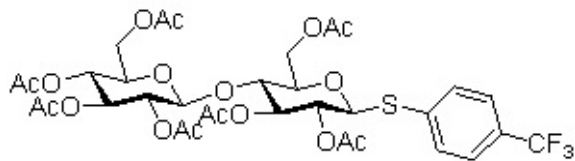

20a

HSQC (400 MHz, CDCl<sub>3</sub>)

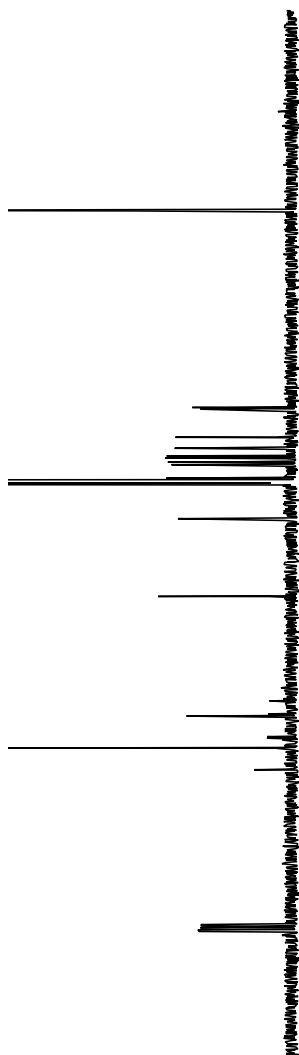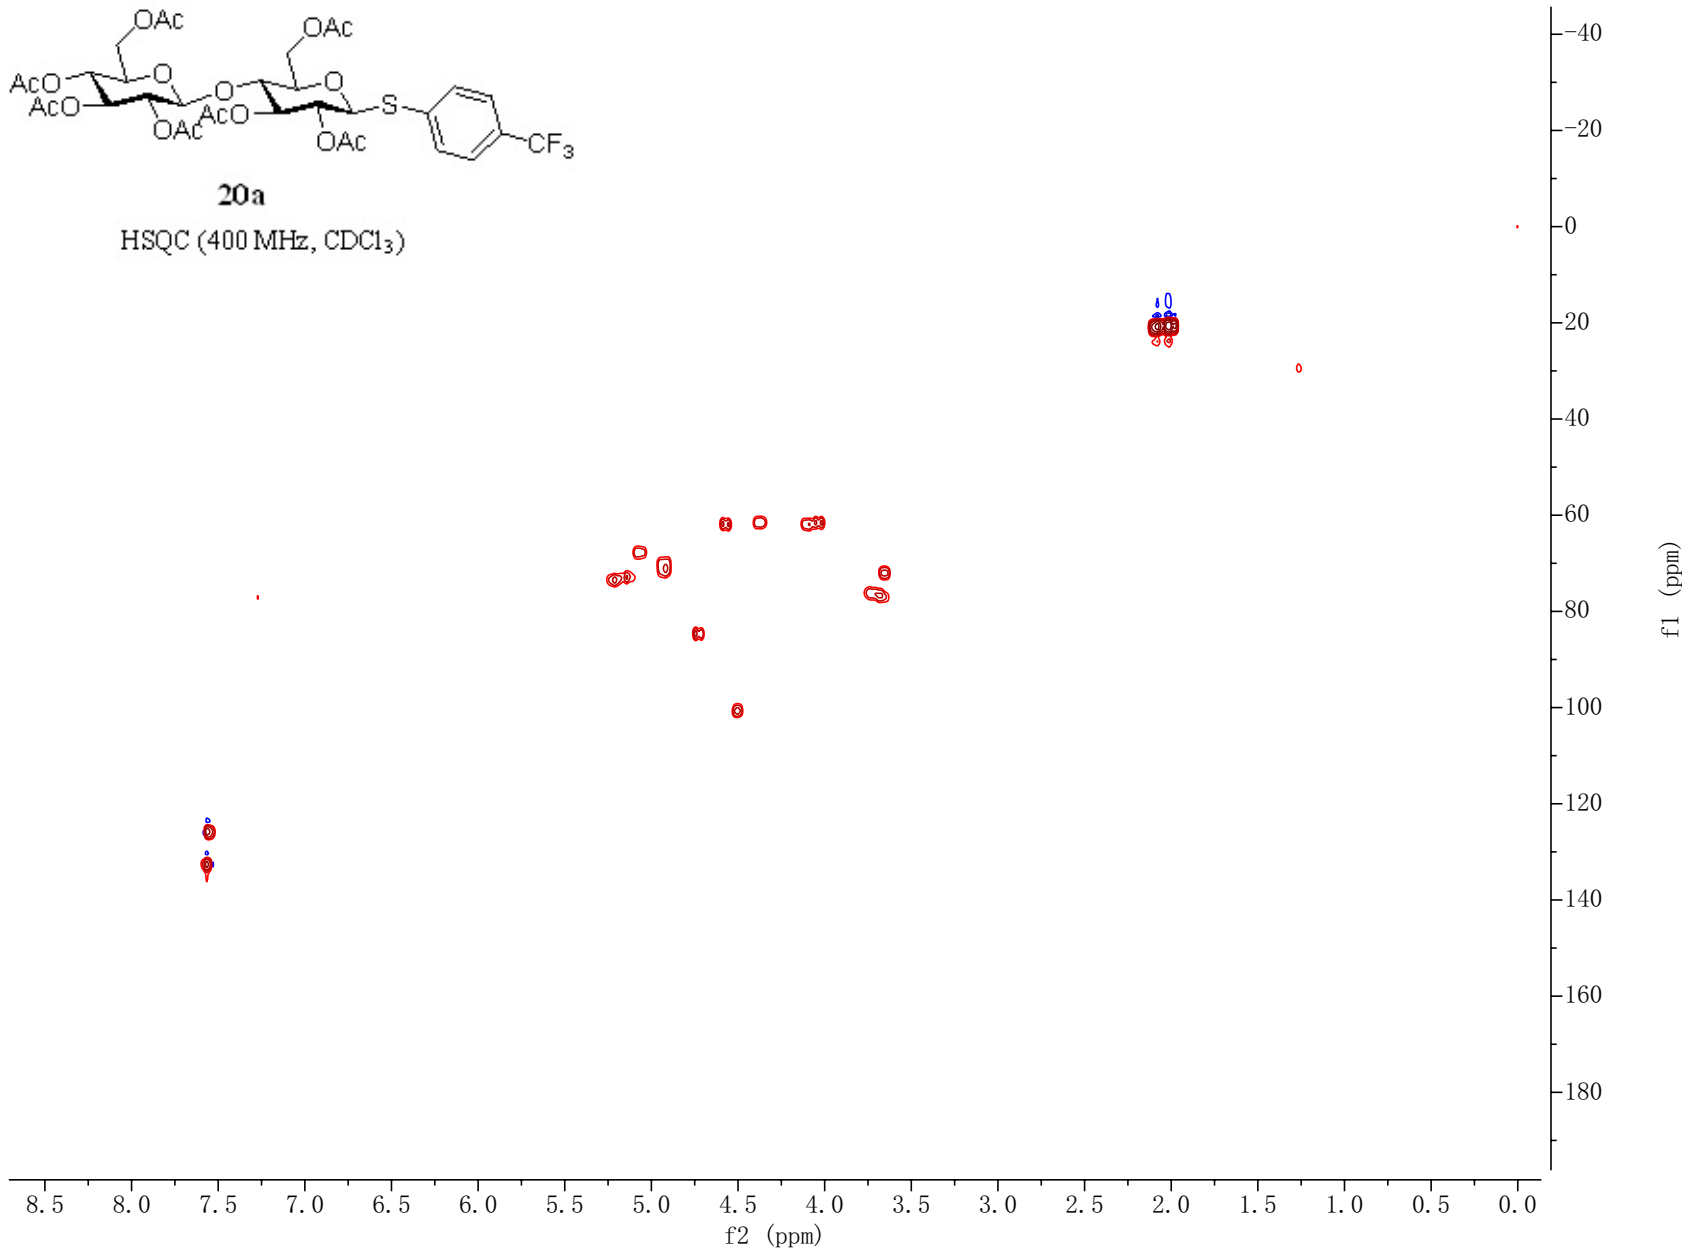

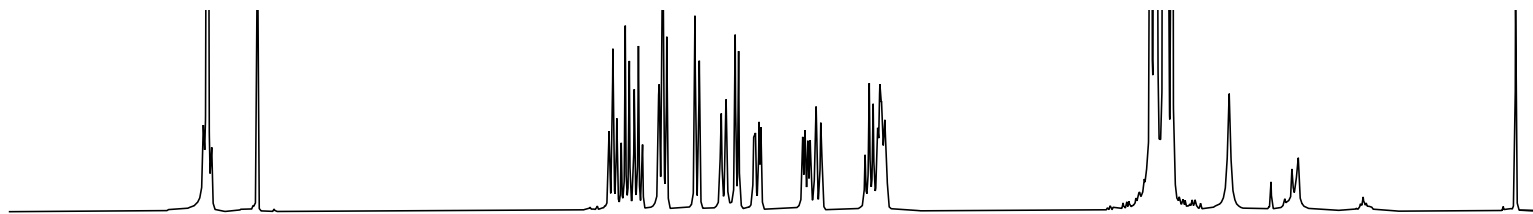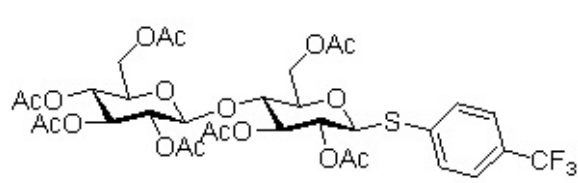

20a

HMBC (400 MHz, CDCl<sub>3</sub>)

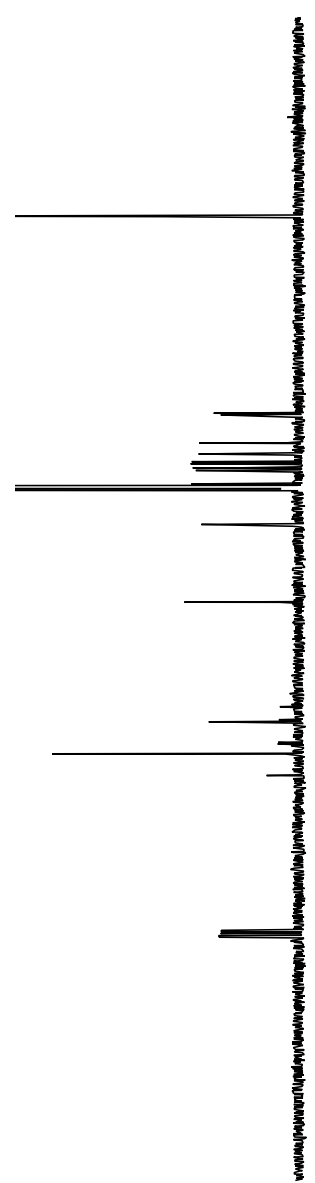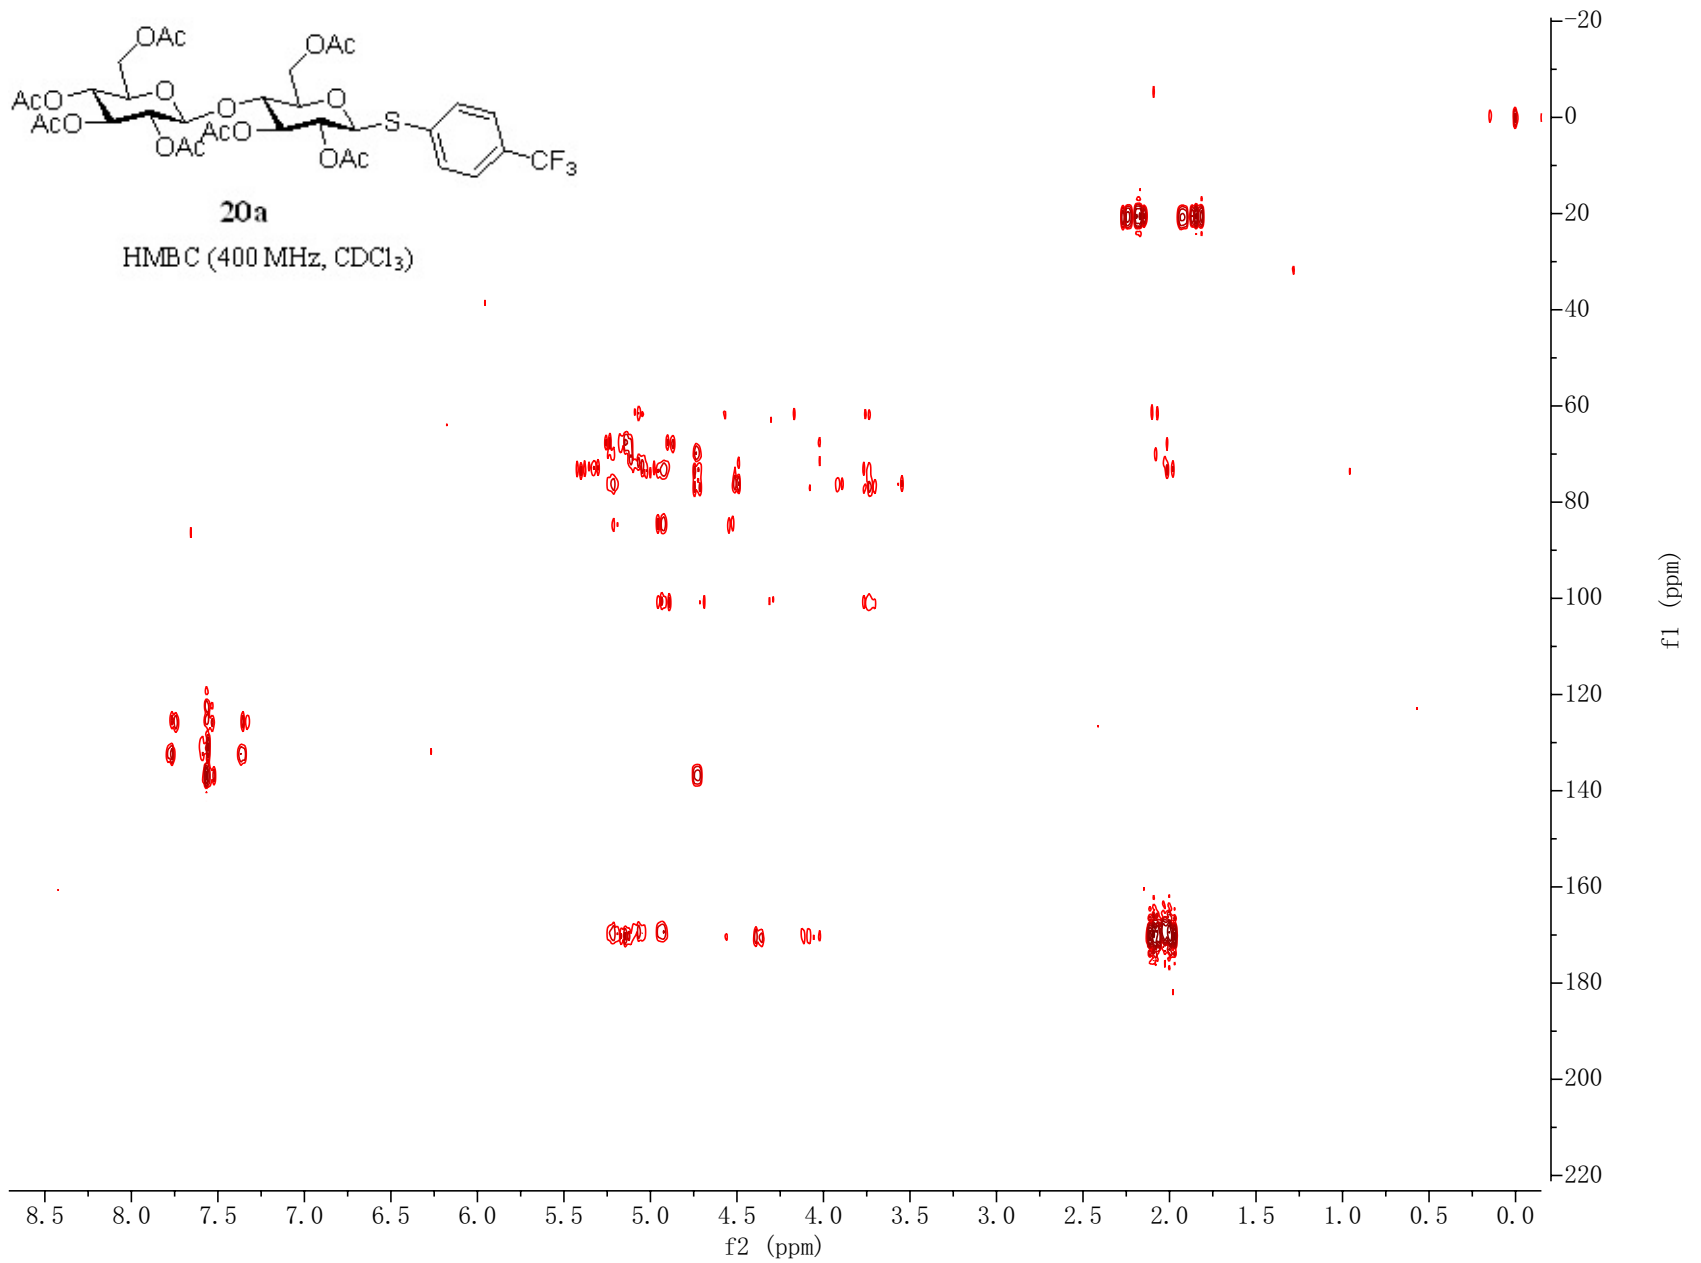

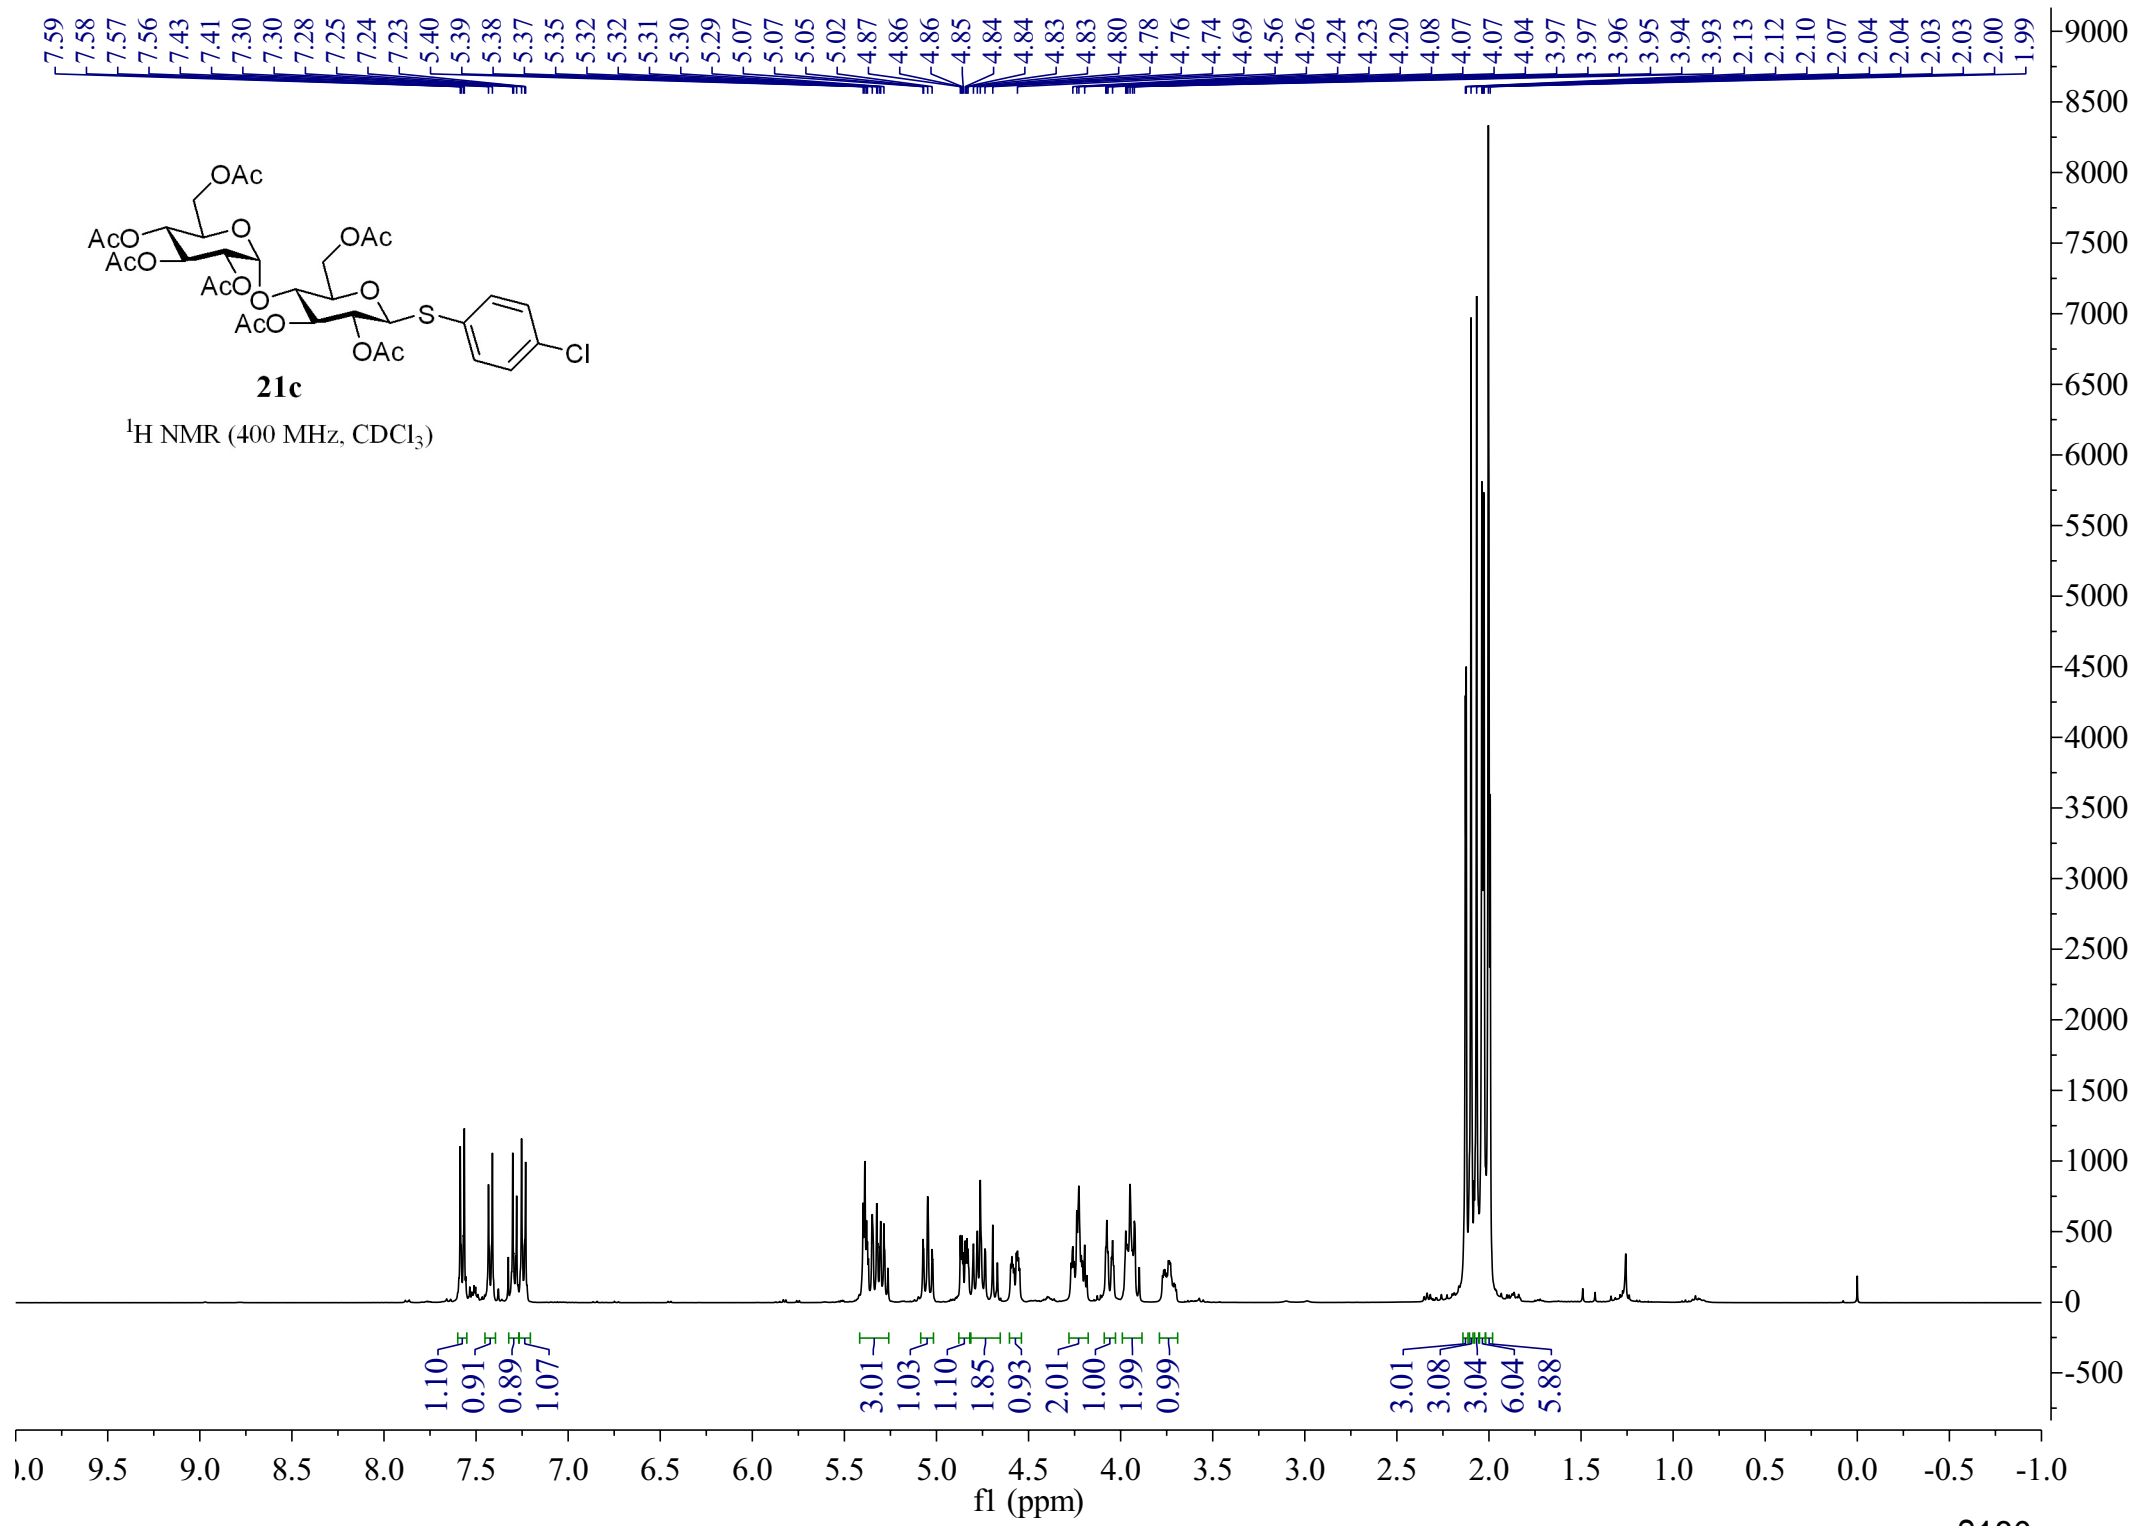

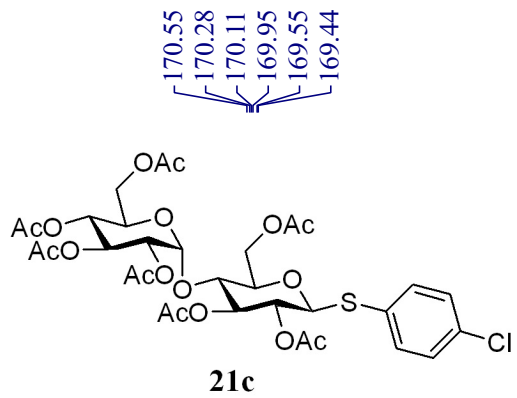

$^{13}\text{C}\{^1\text{H}\}$  NMR (100 MHz,  $\text{CDCl}_3$ )

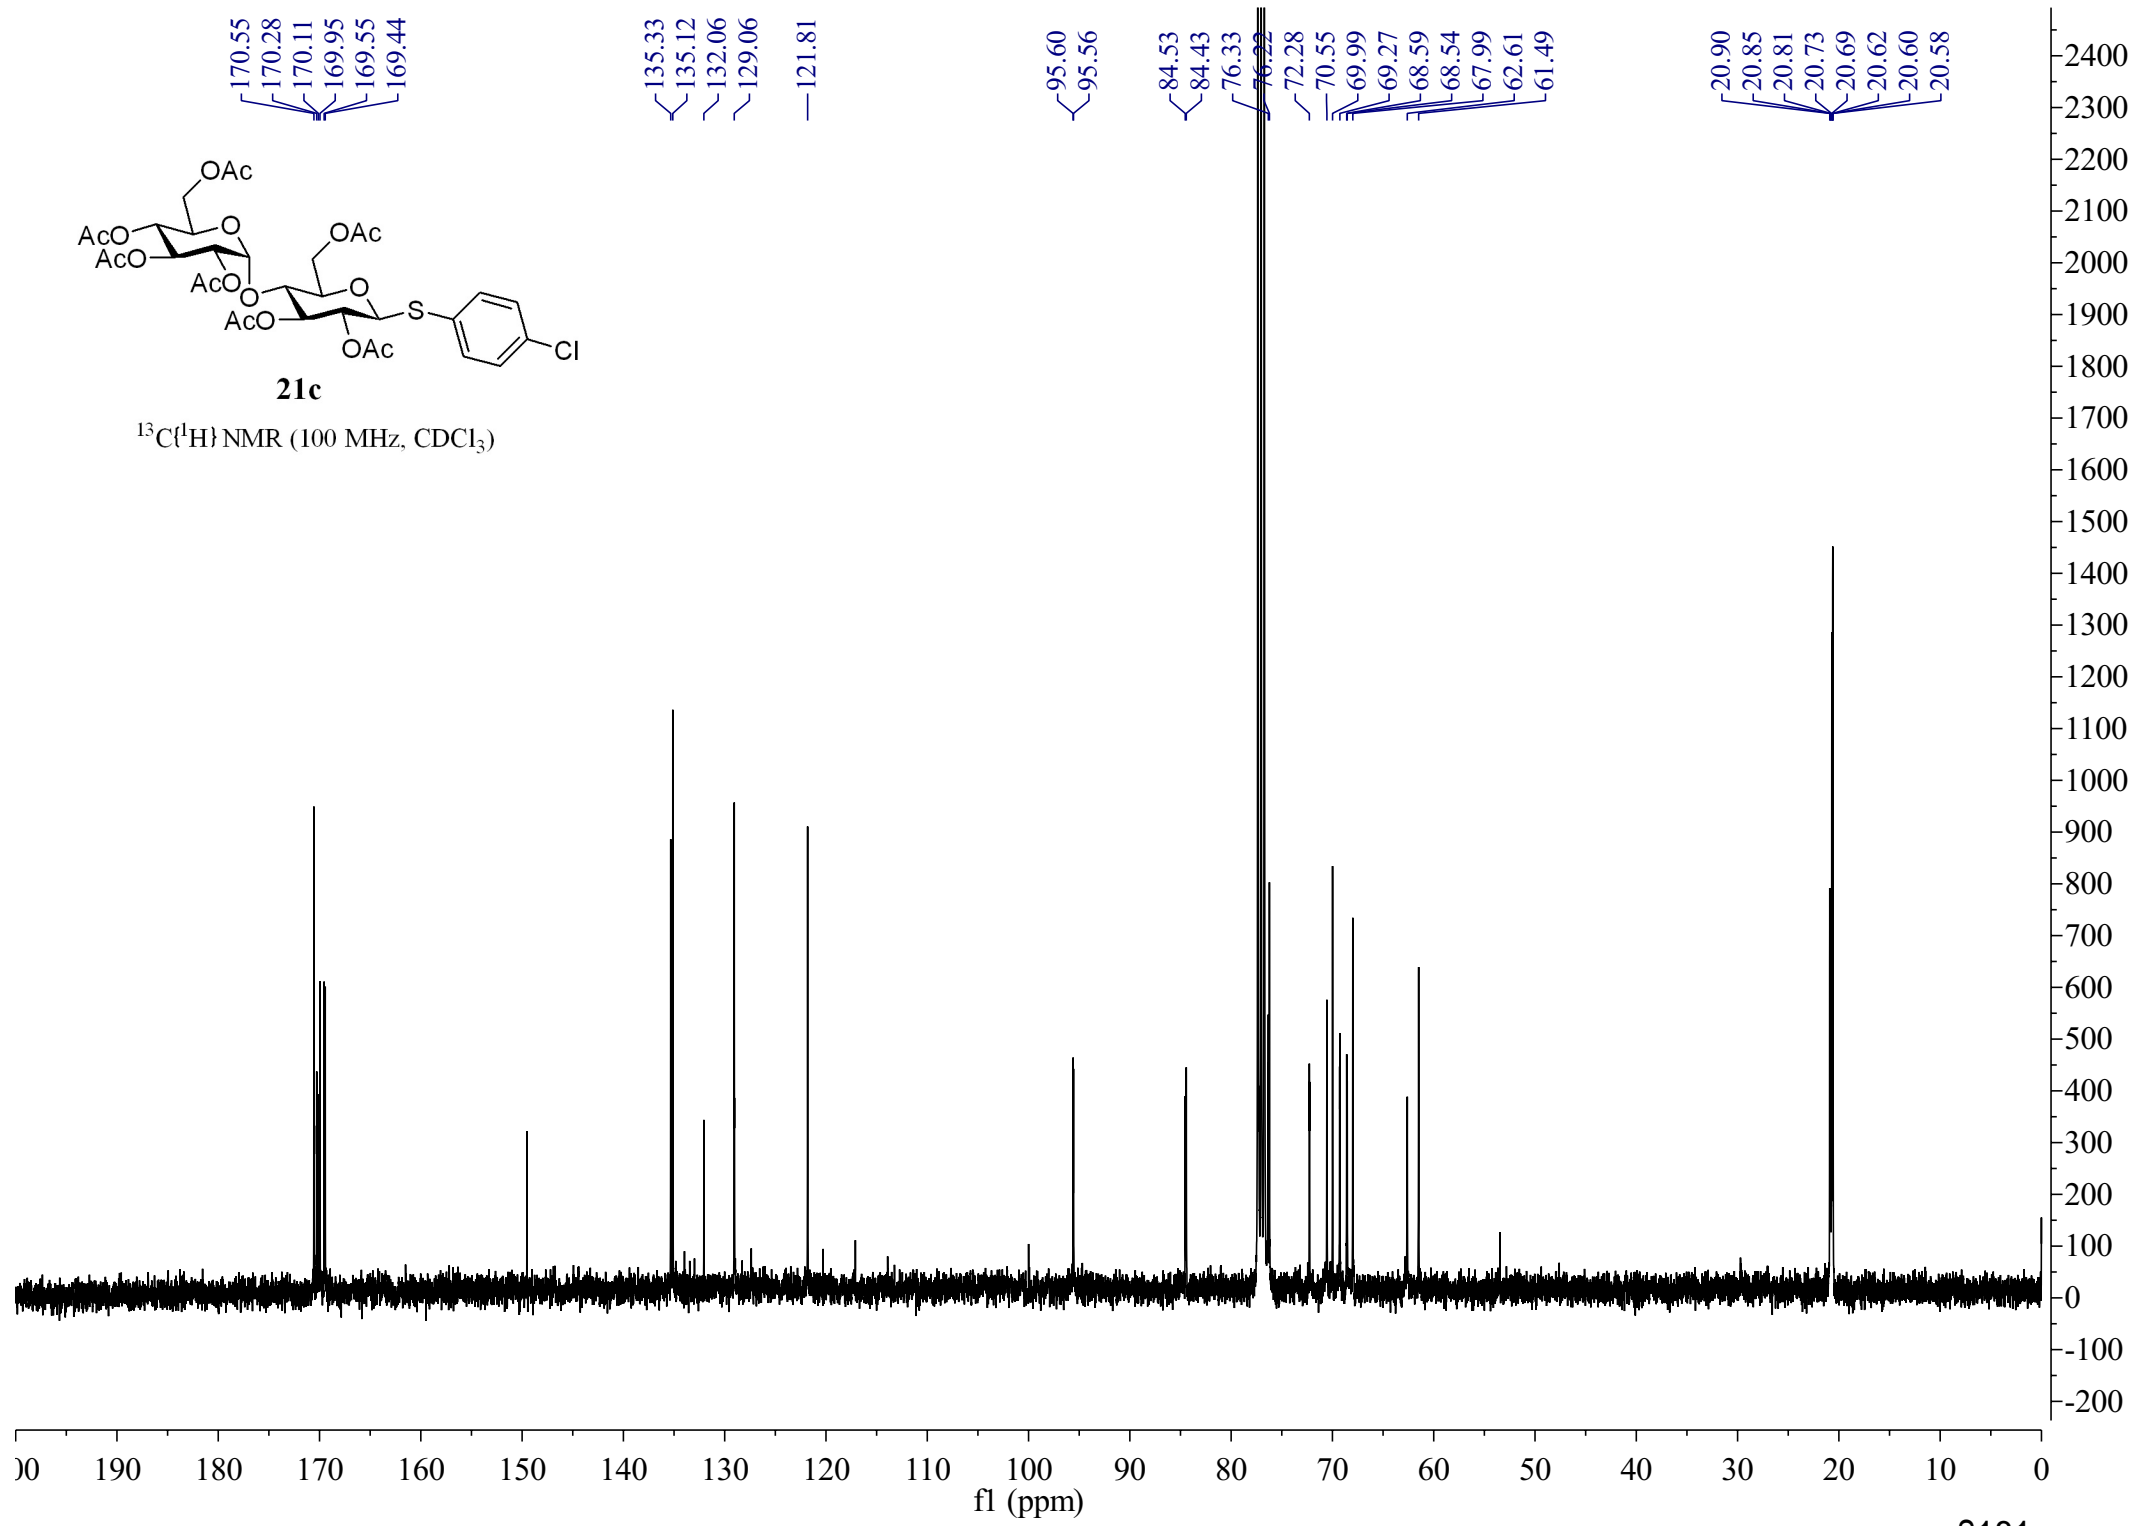

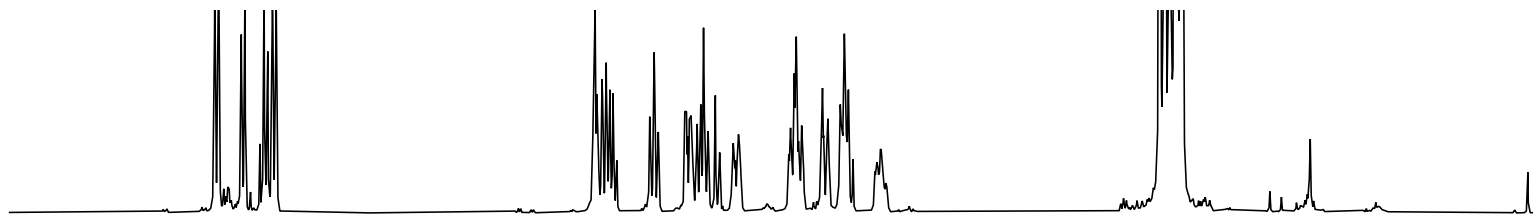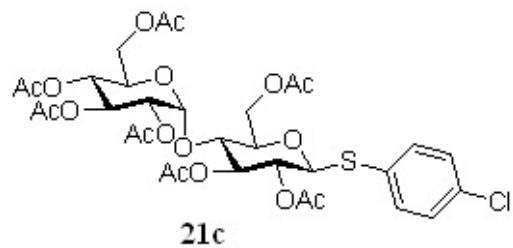

$^1\text{H}$ - $^1\text{H}$  COSY (400 MHz,  $\text{CDCl}_3$ )

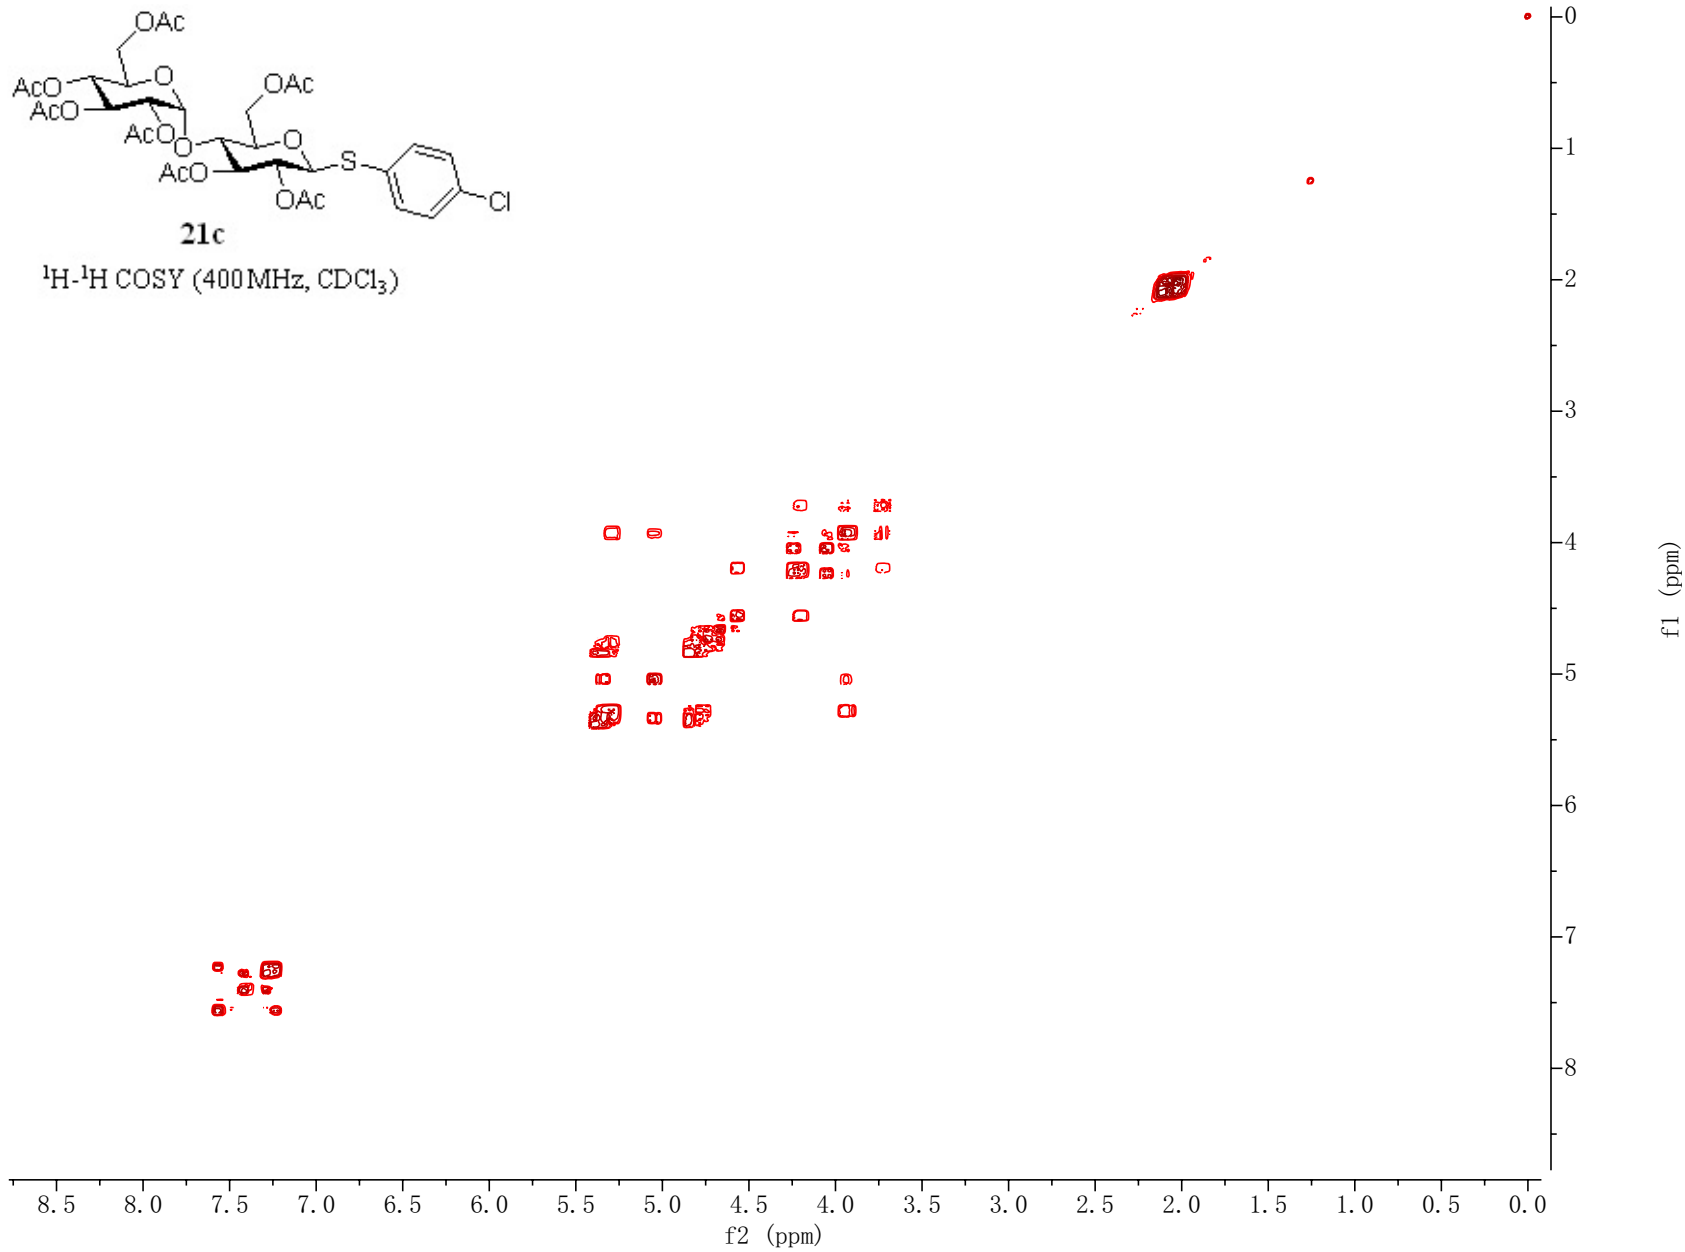

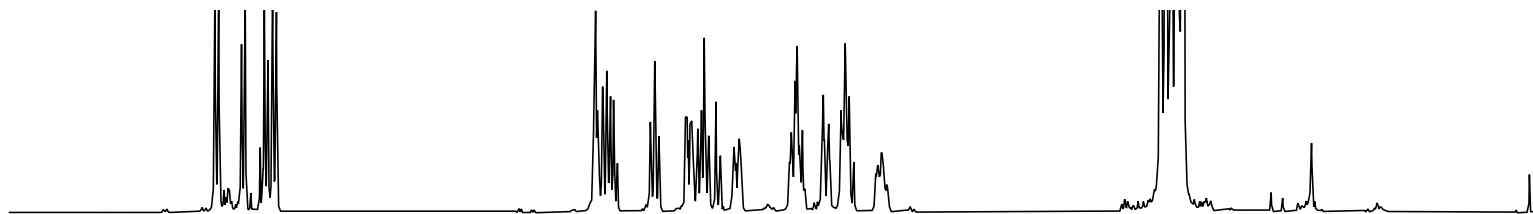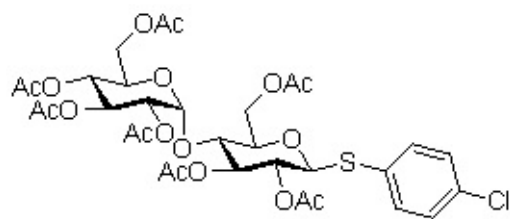

21c

HSQC (400 MHz, CDCl<sub>3</sub>)

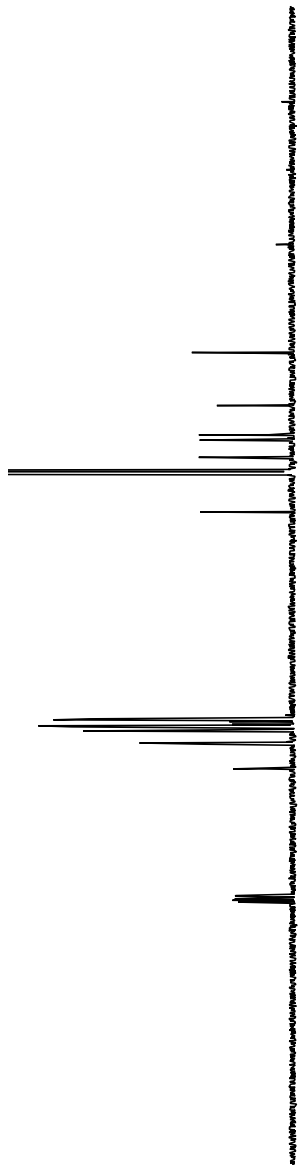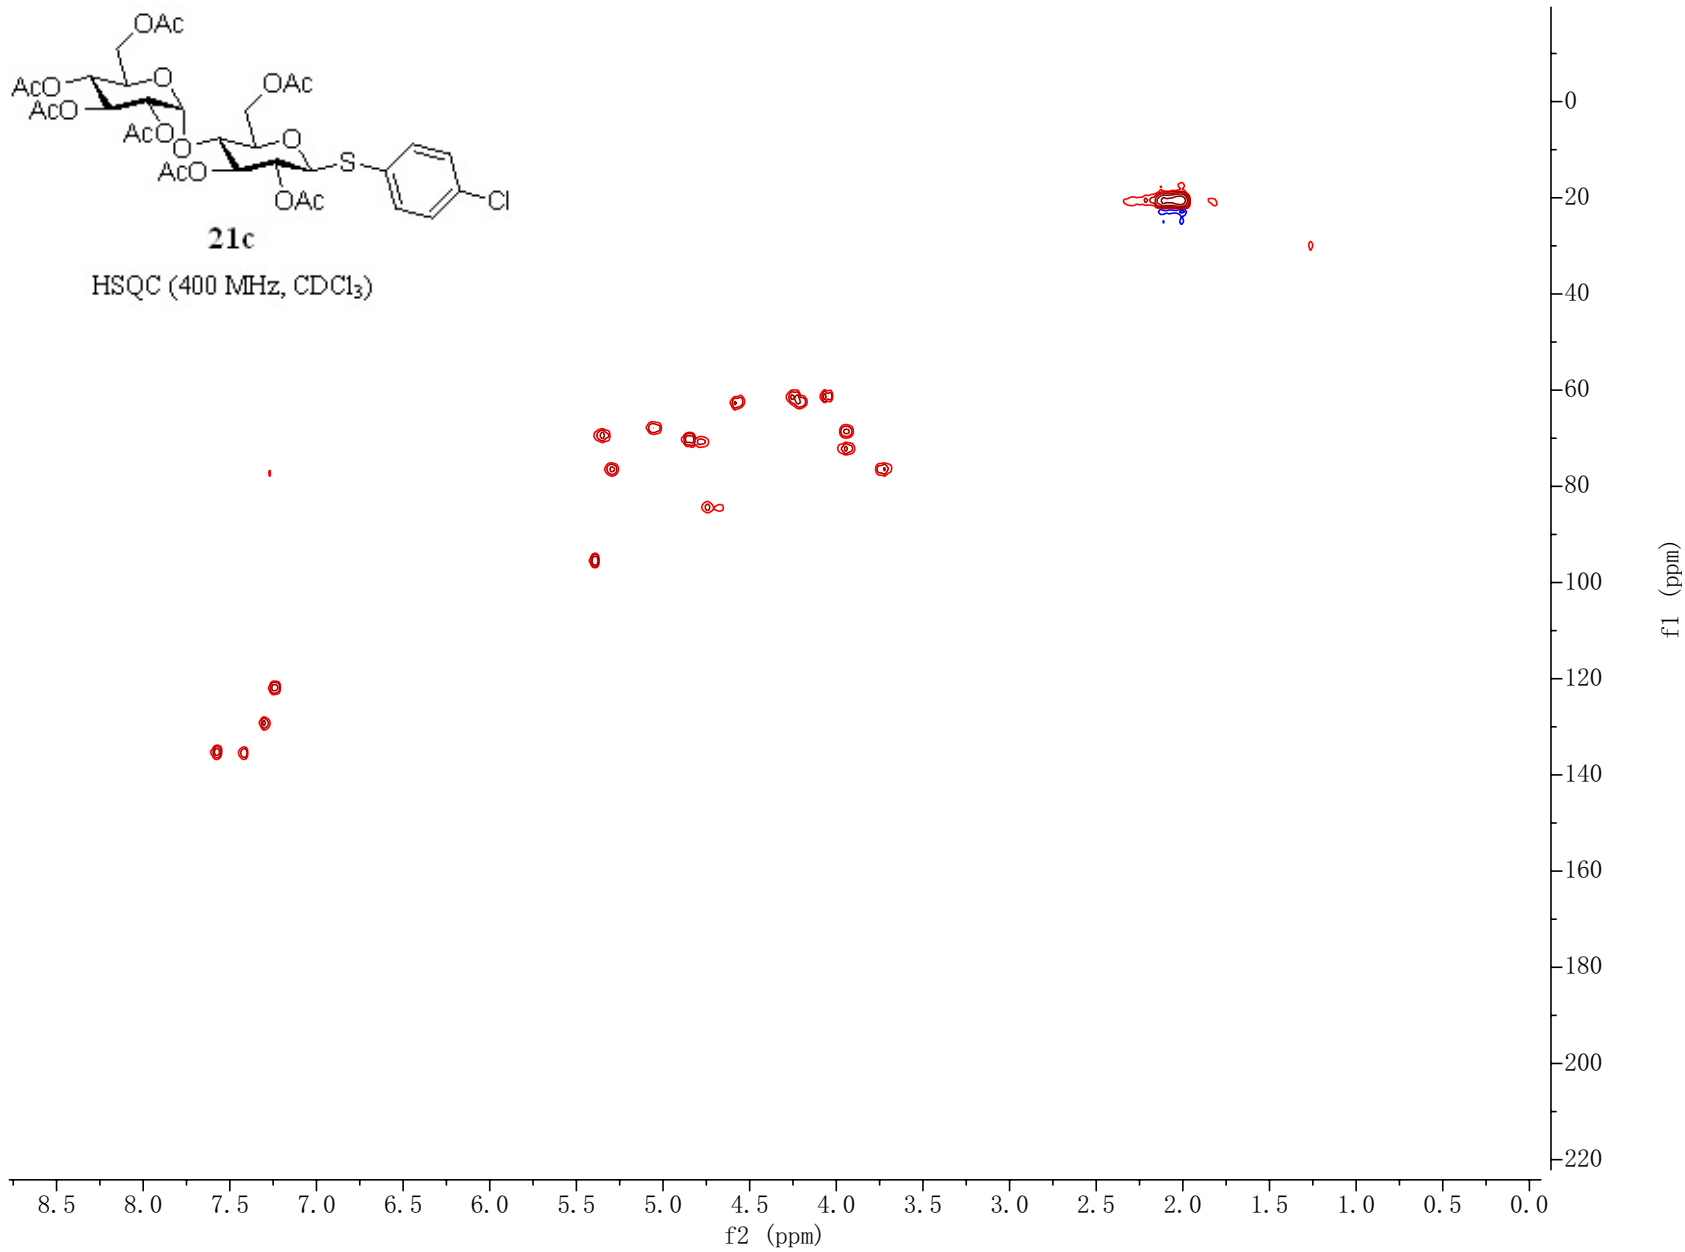

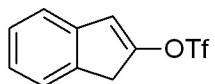

**22b**

<sup>1</sup>H NMR (400 MHz, CDCl<sub>3</sub>)

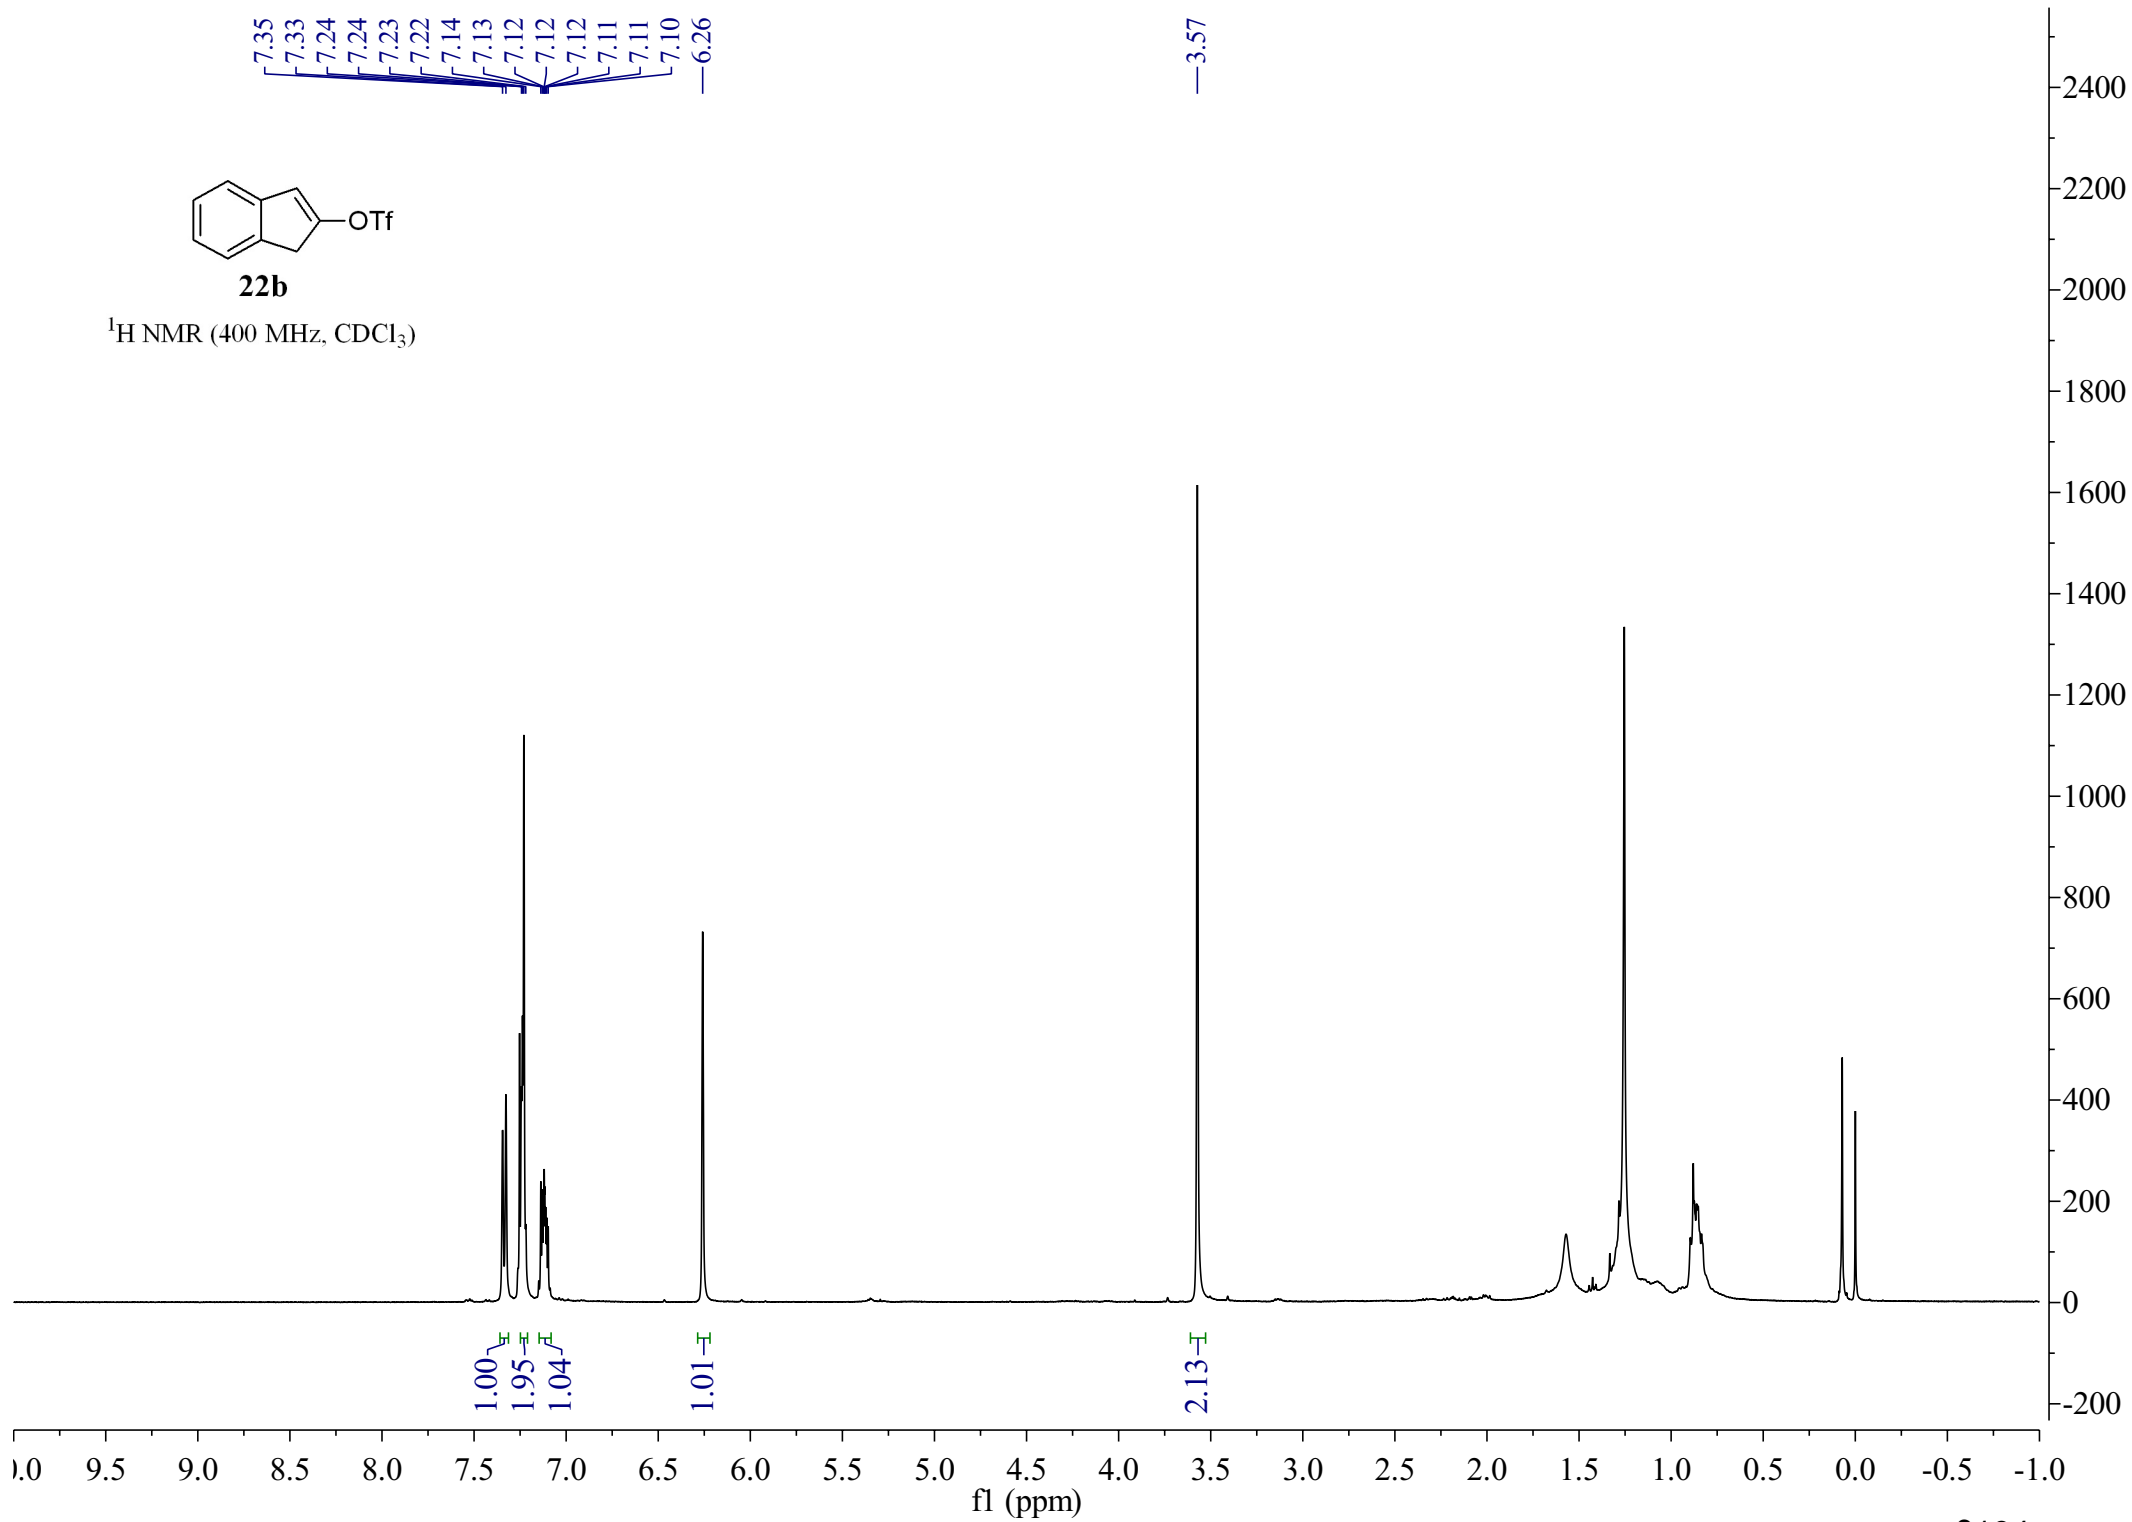

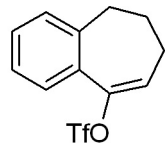

**22d**

$^1\text{H}$  NMR (400 MHz,  $\text{CDCl}_3$ )

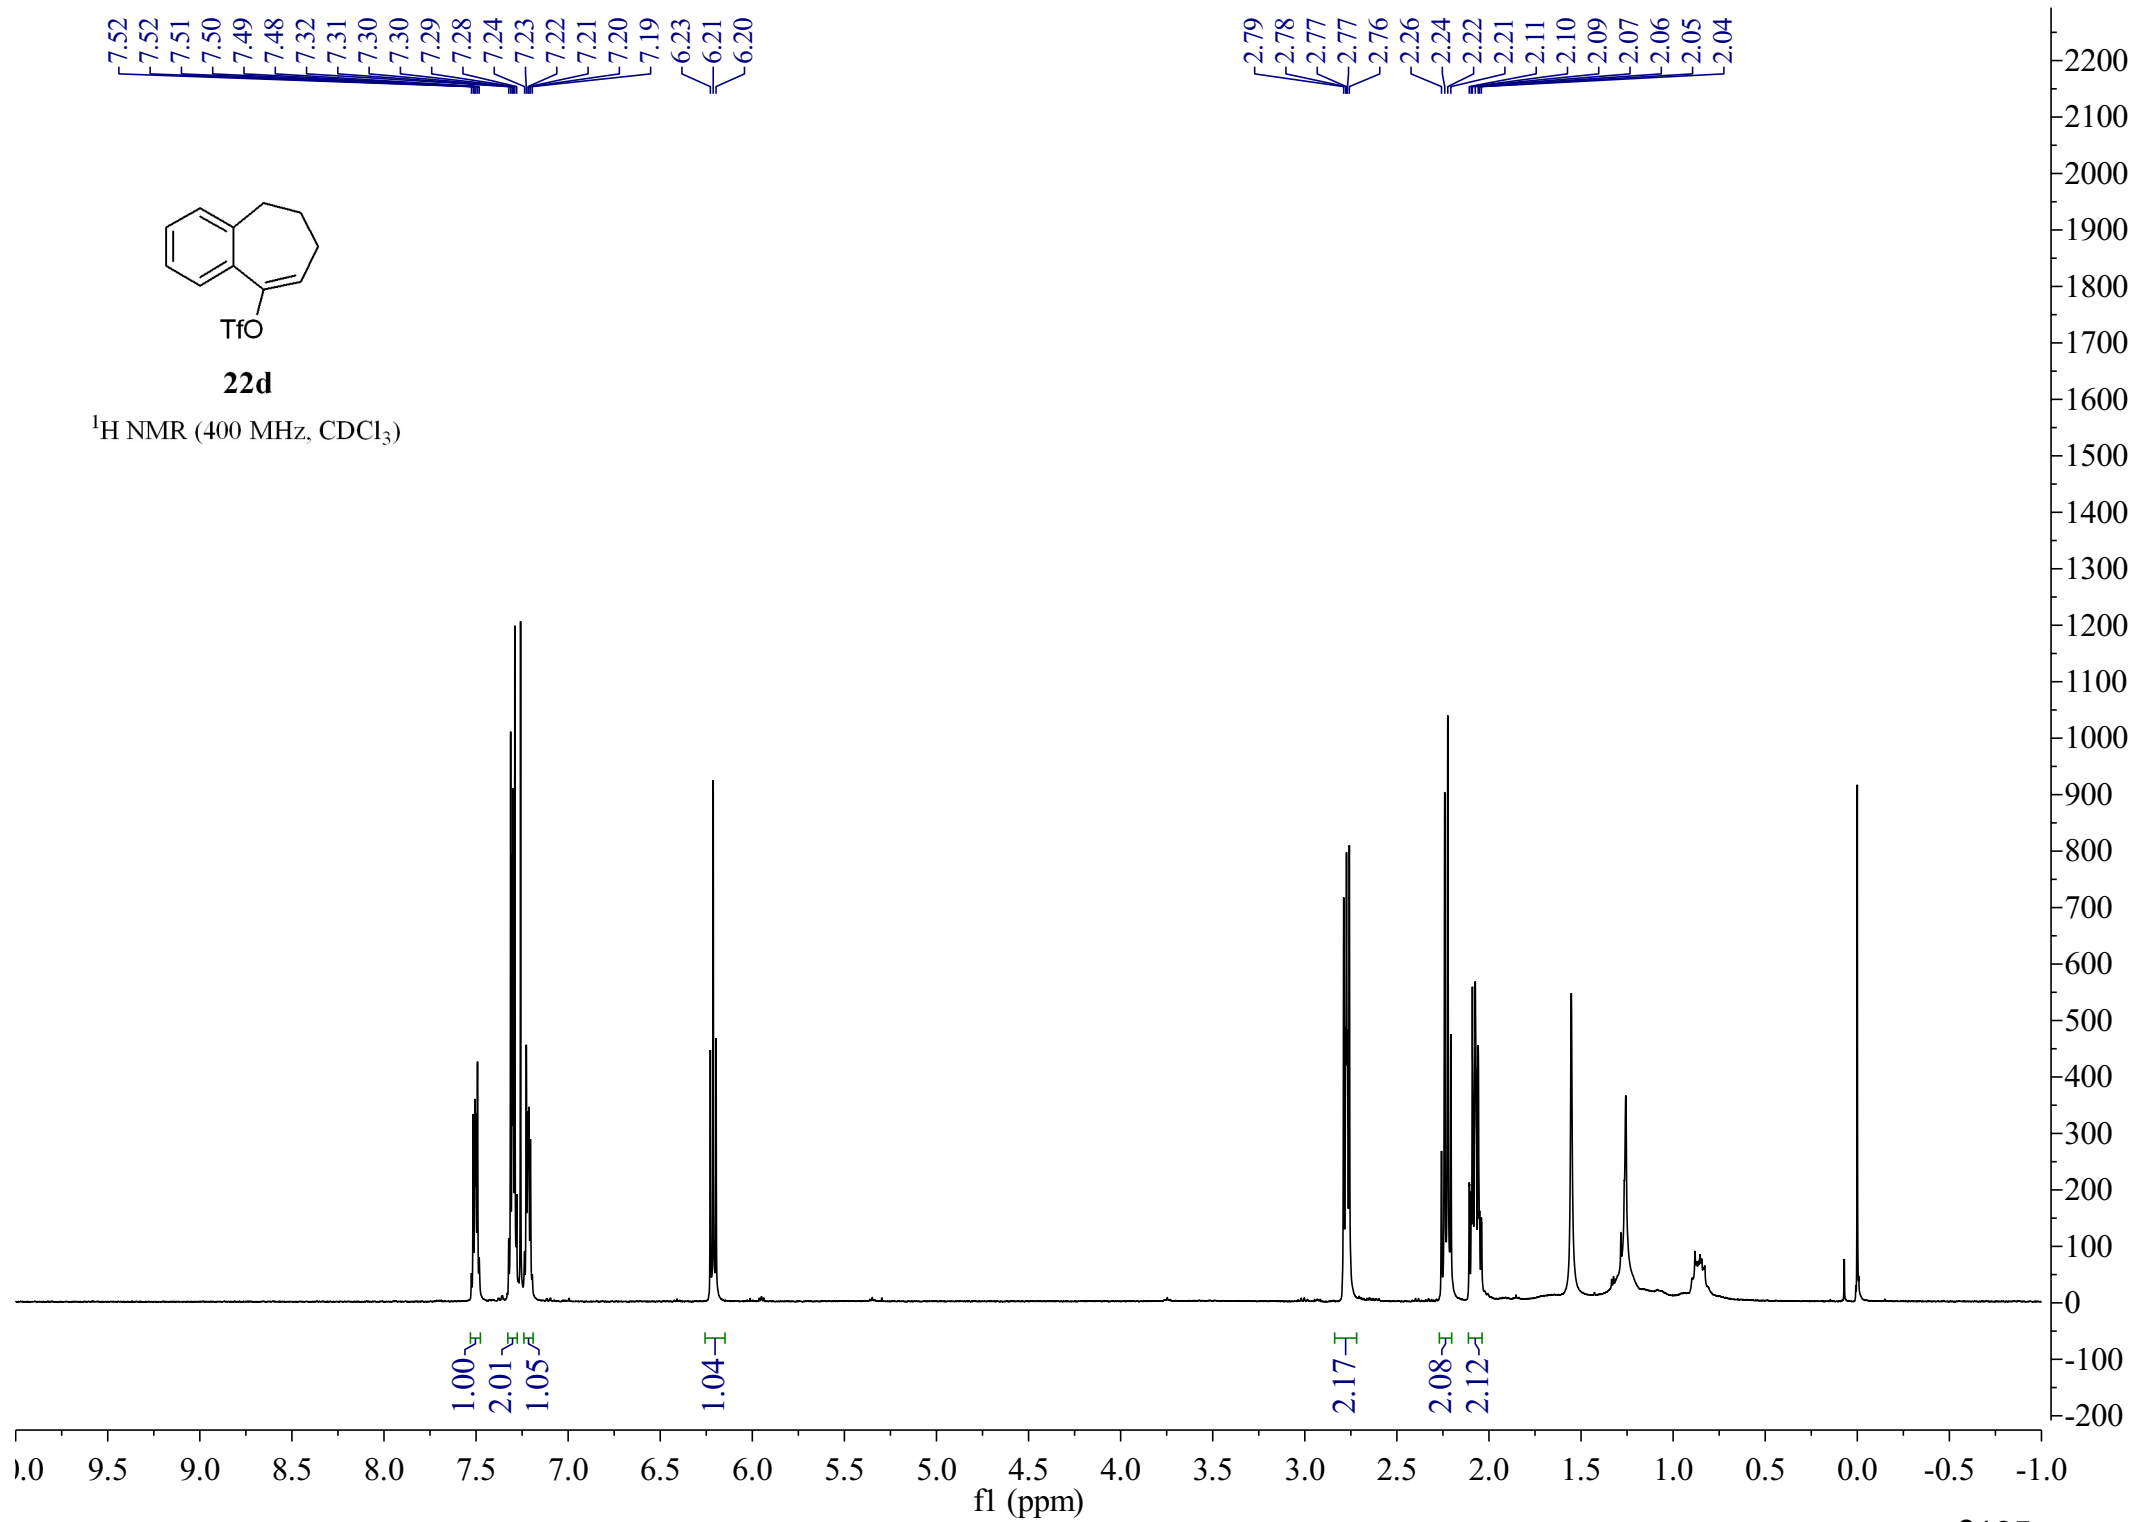



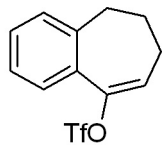

TfO

**22d**

$^{19}\text{F}$  NMR (376 MHz,  $\text{CDCl}_3$ )

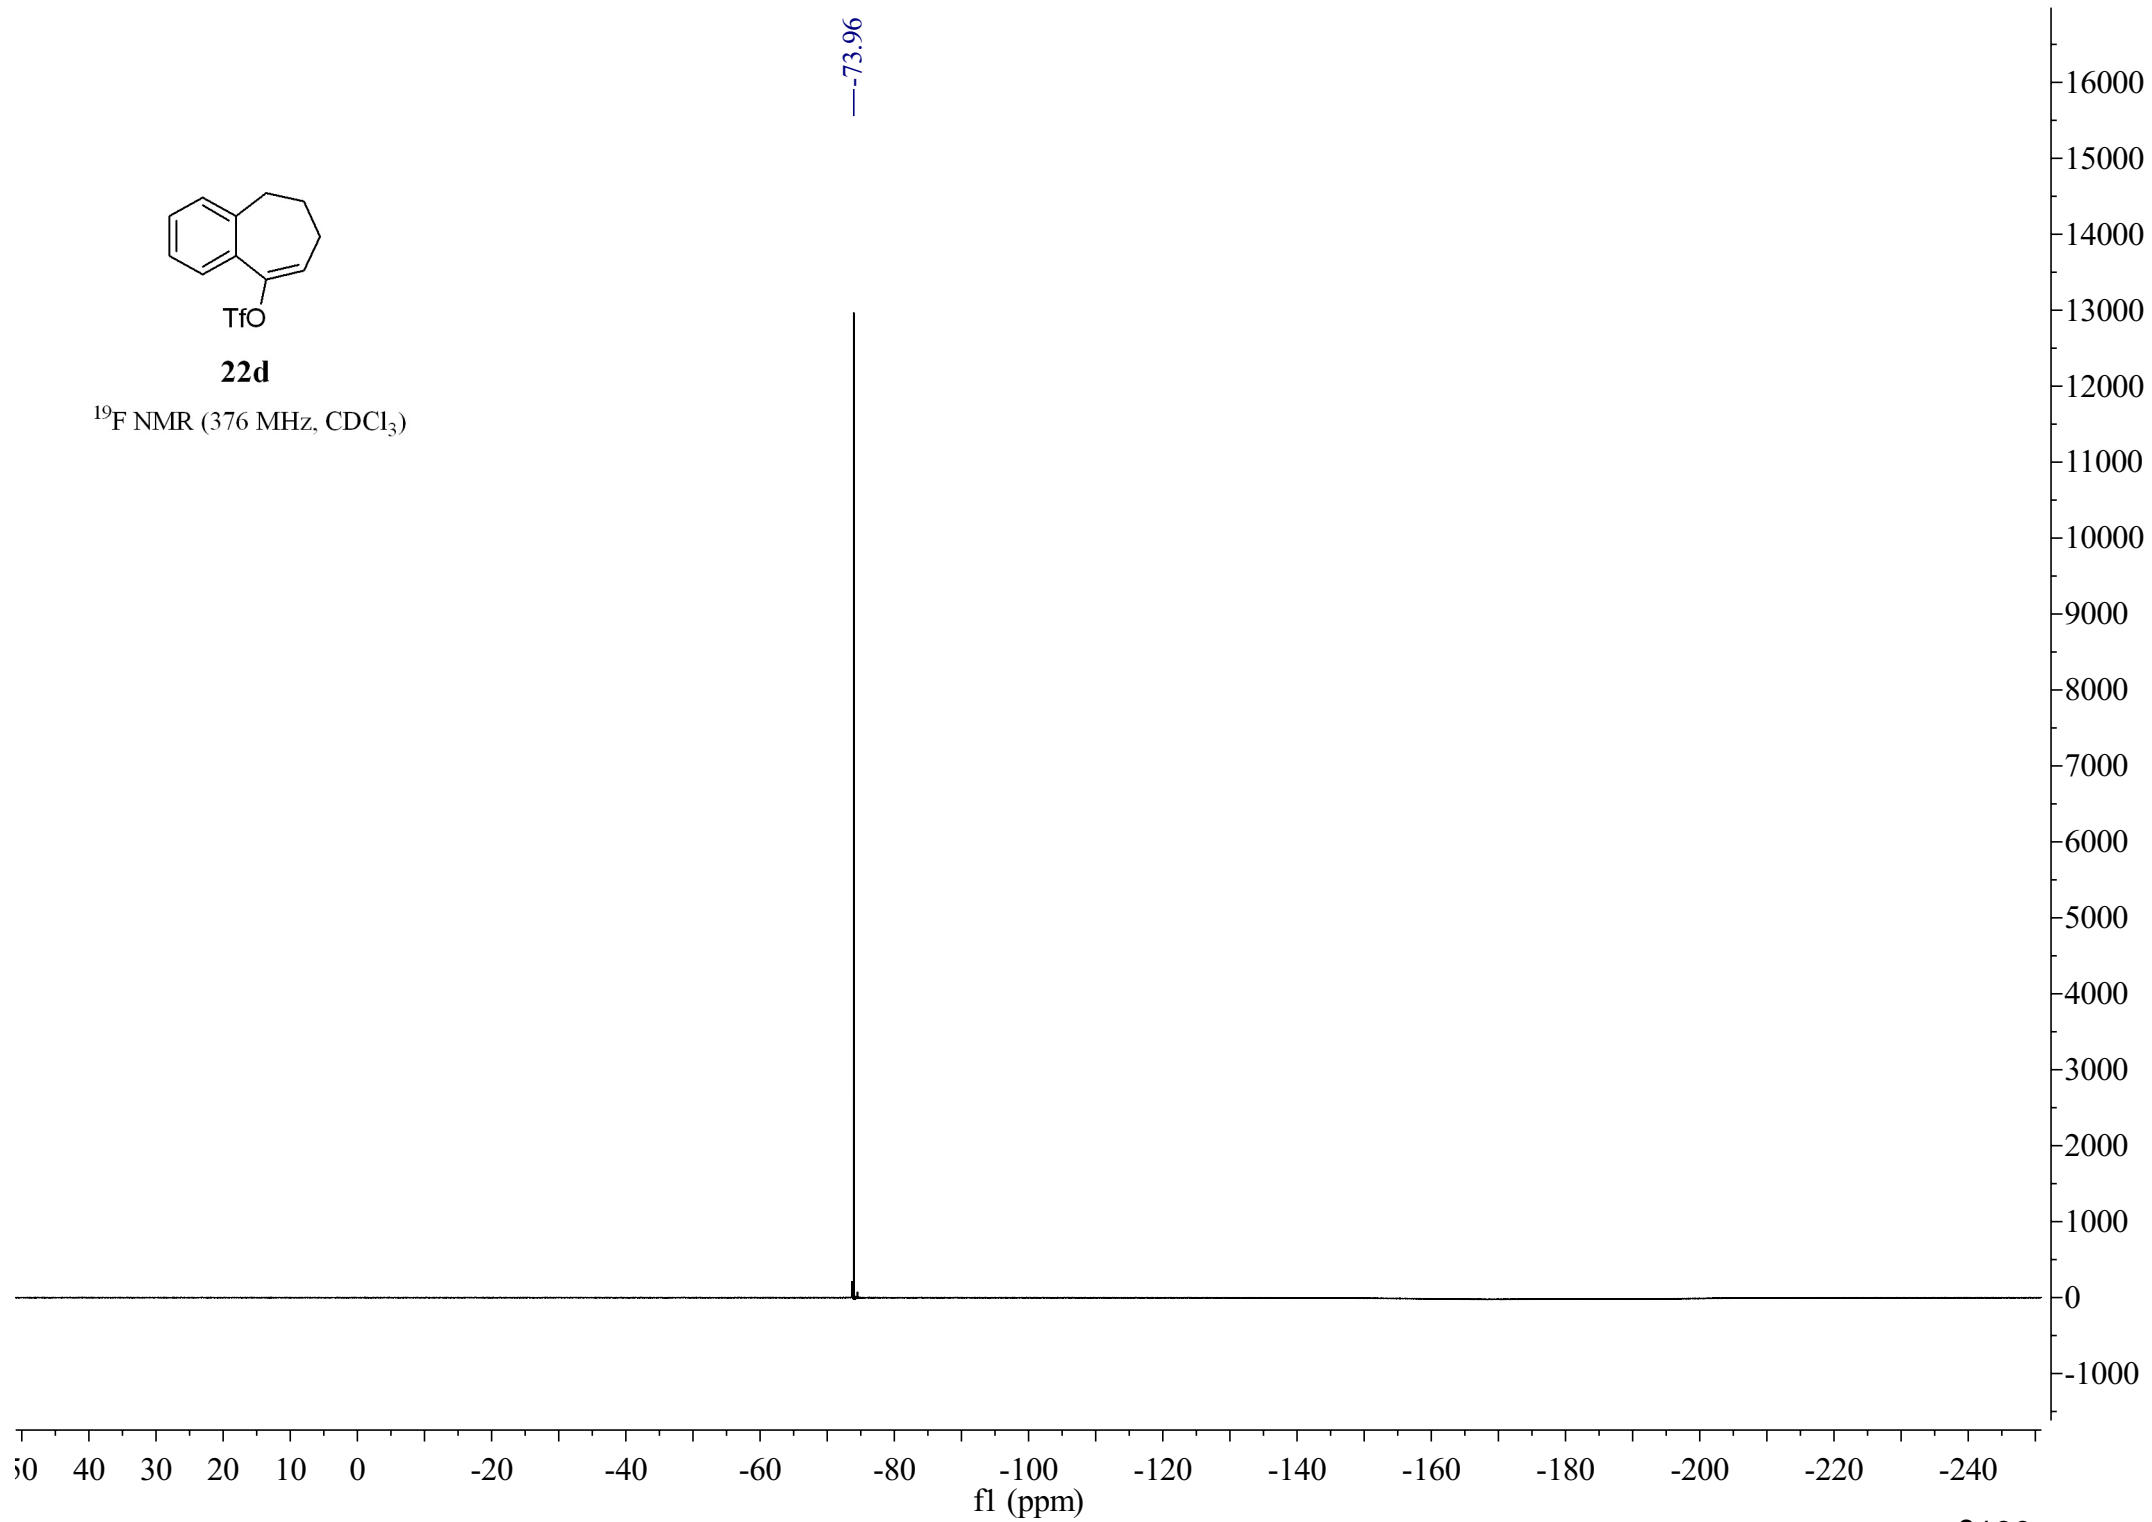

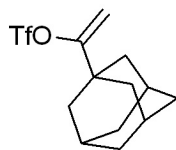

**22e**

<sup>1</sup>H NMR (400 MHz, CDCl<sub>3</sub>)

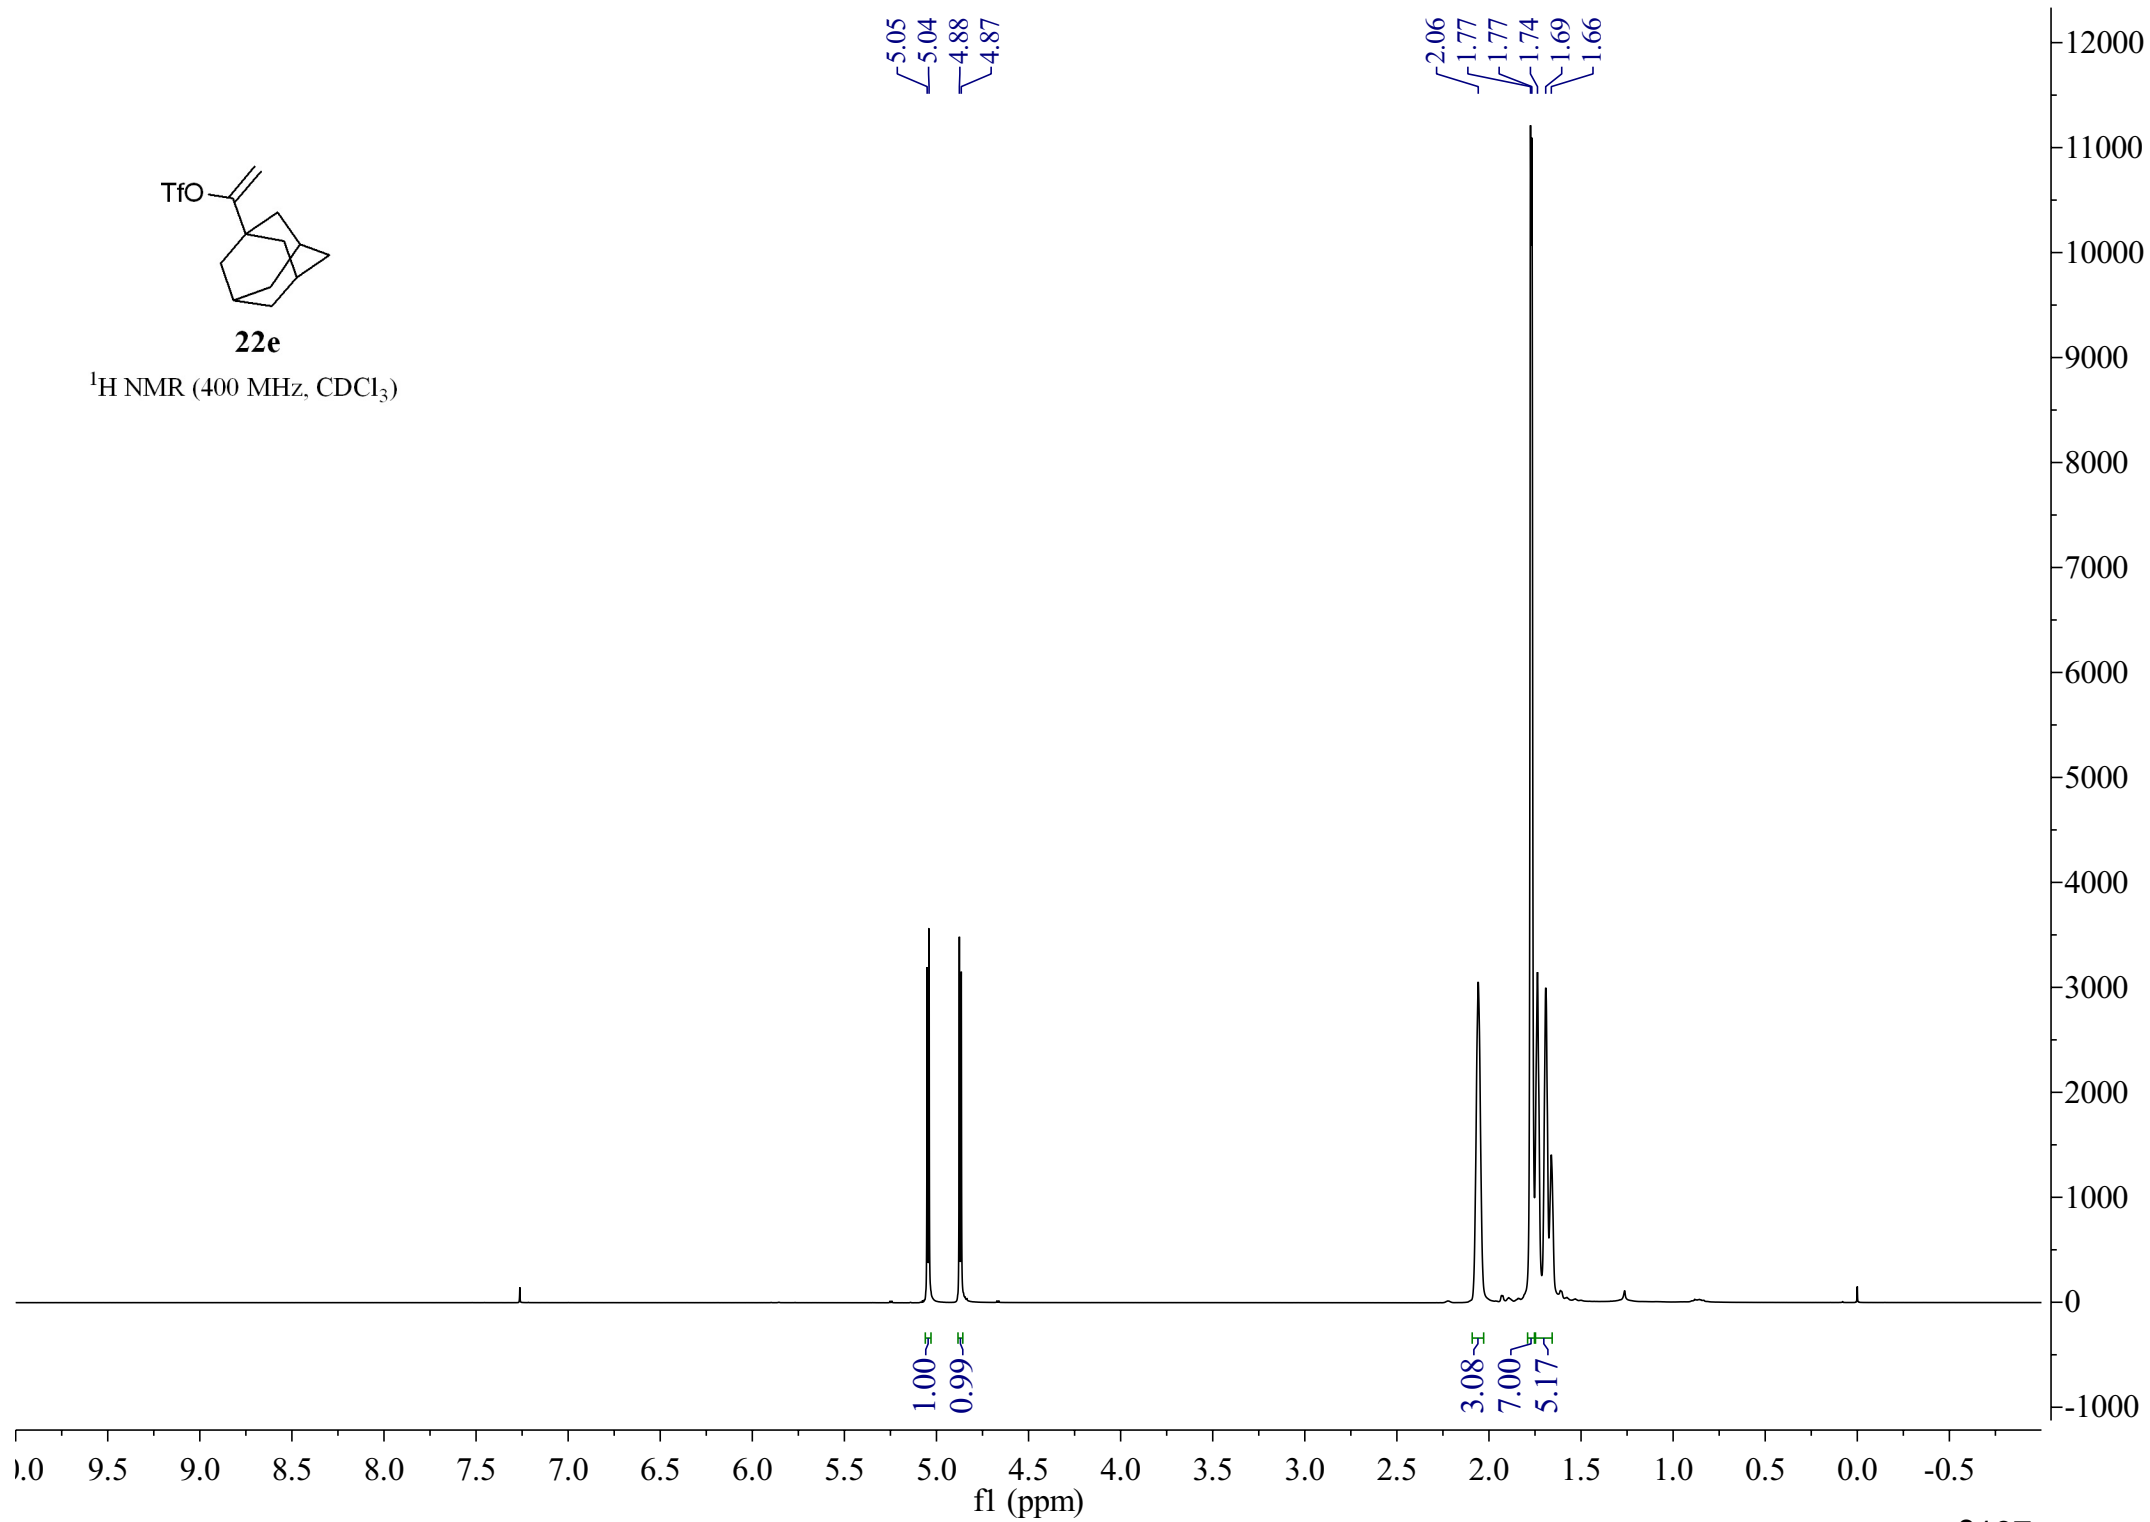

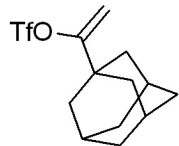

**22e**

$^{19}\text{F}$  NMR (376 MHz,  $\text{CDCl}_3$ )

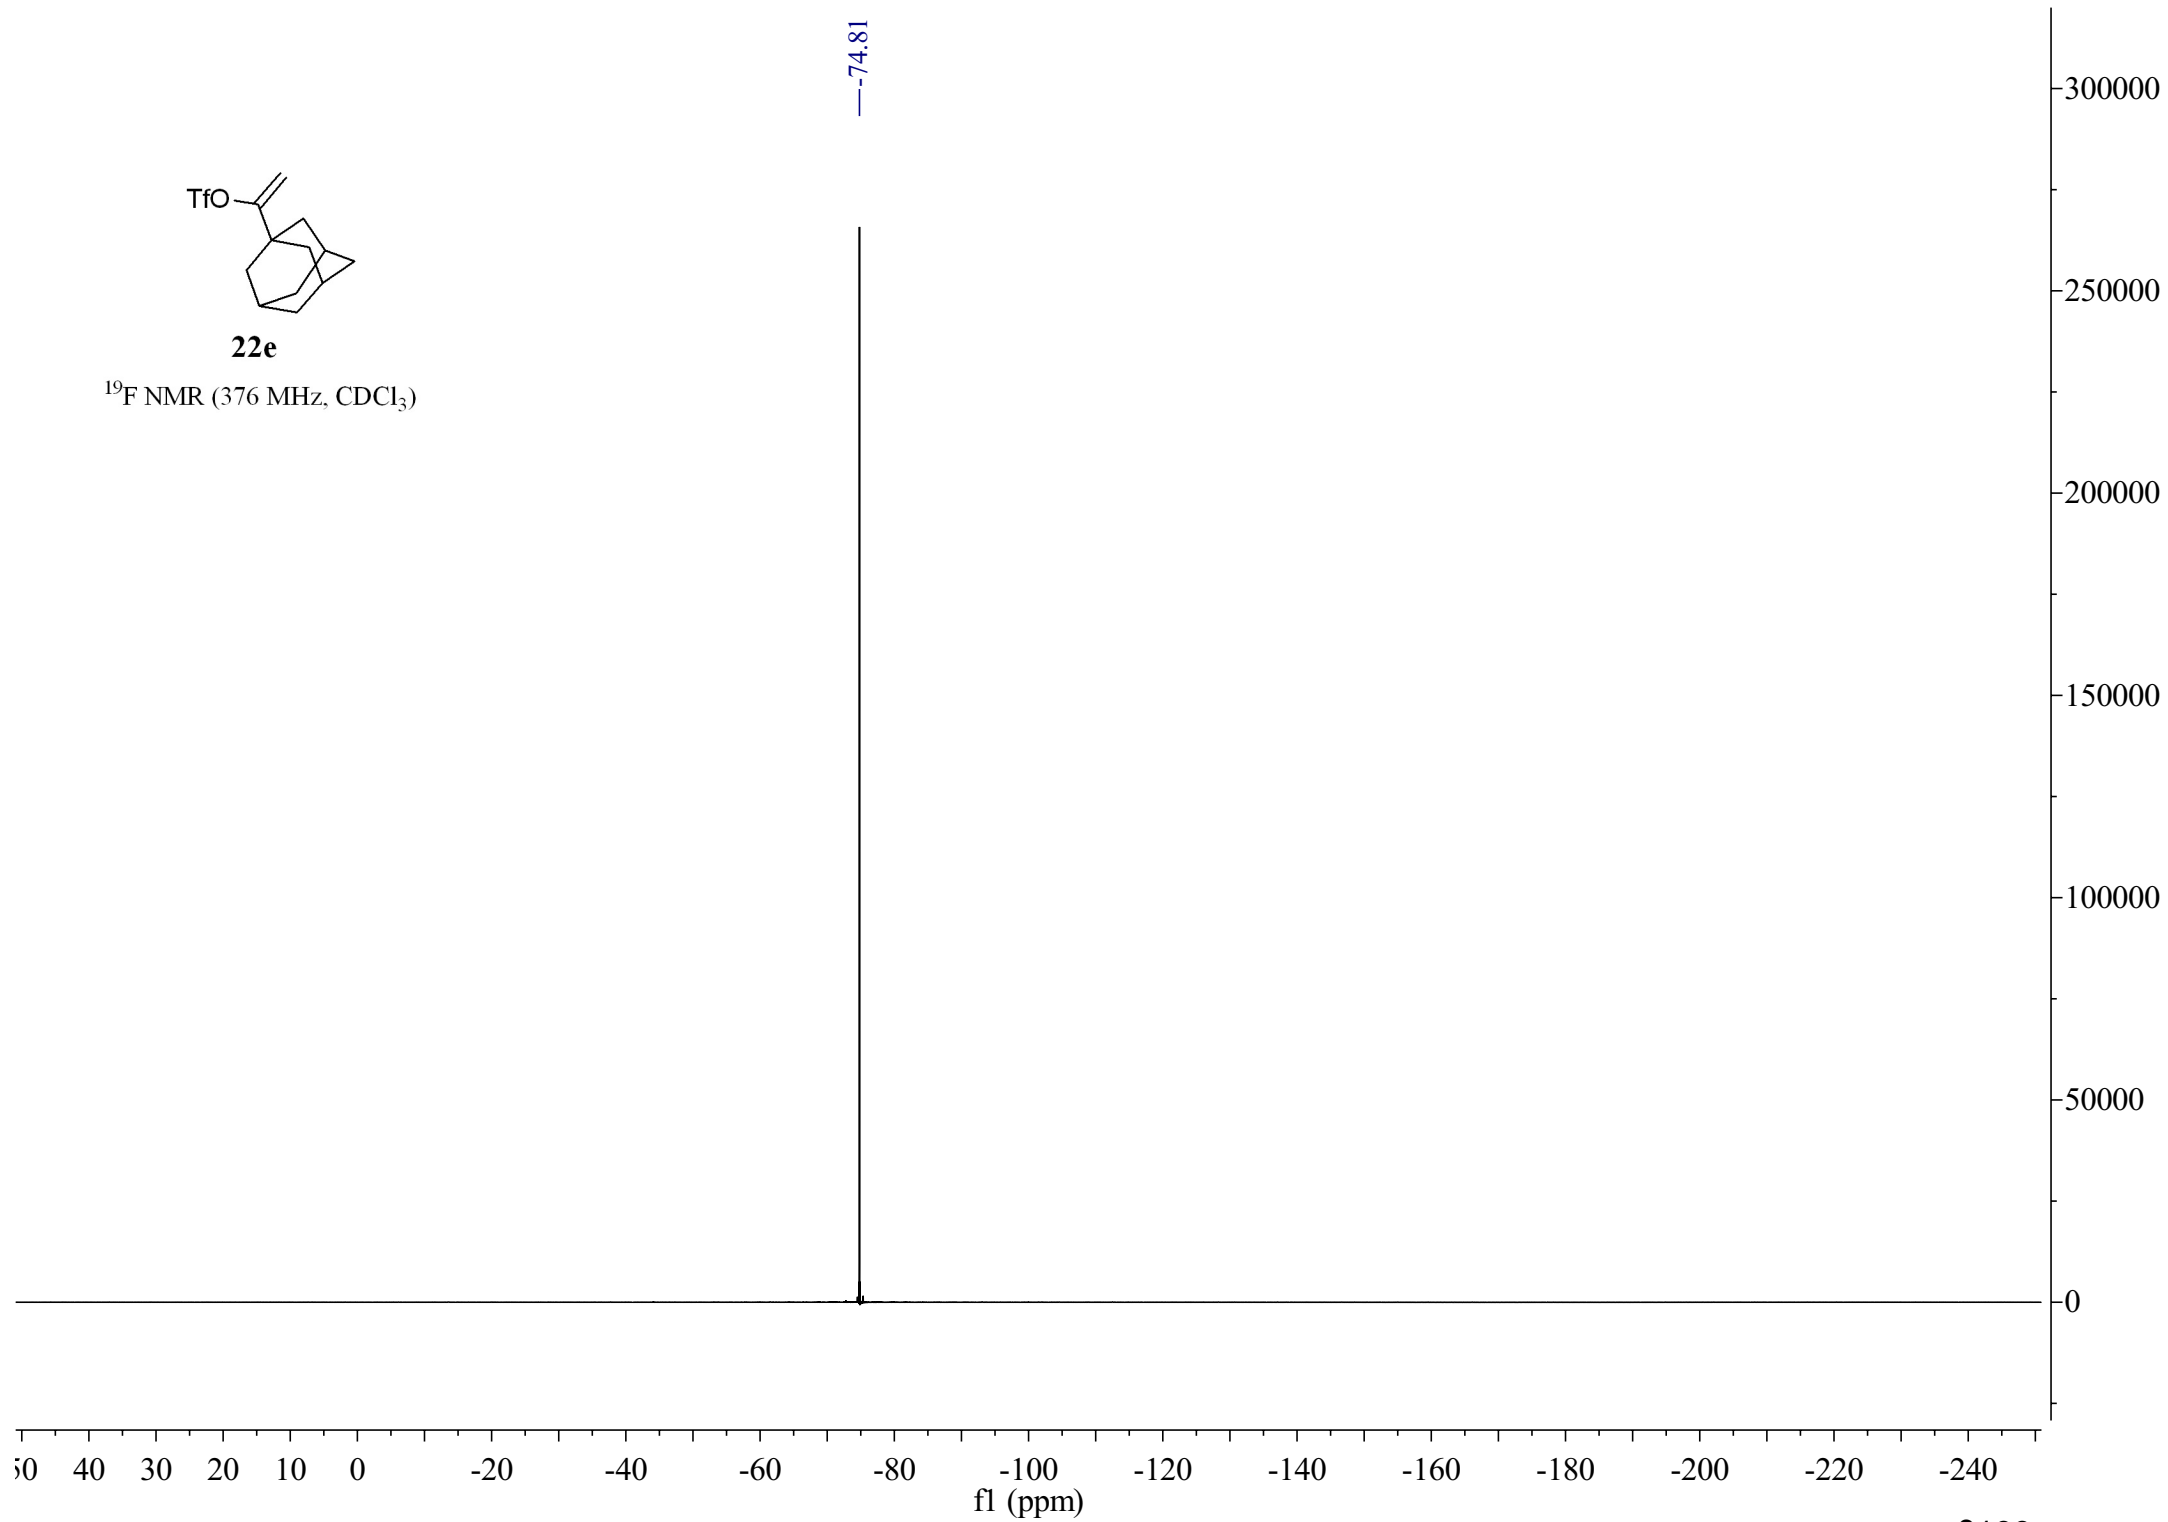

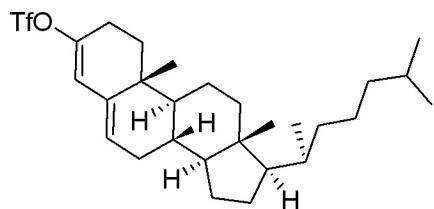

**22f**

$^1\text{H}$  NMR (400 MHz,  $\text{CDCl}_3$ )

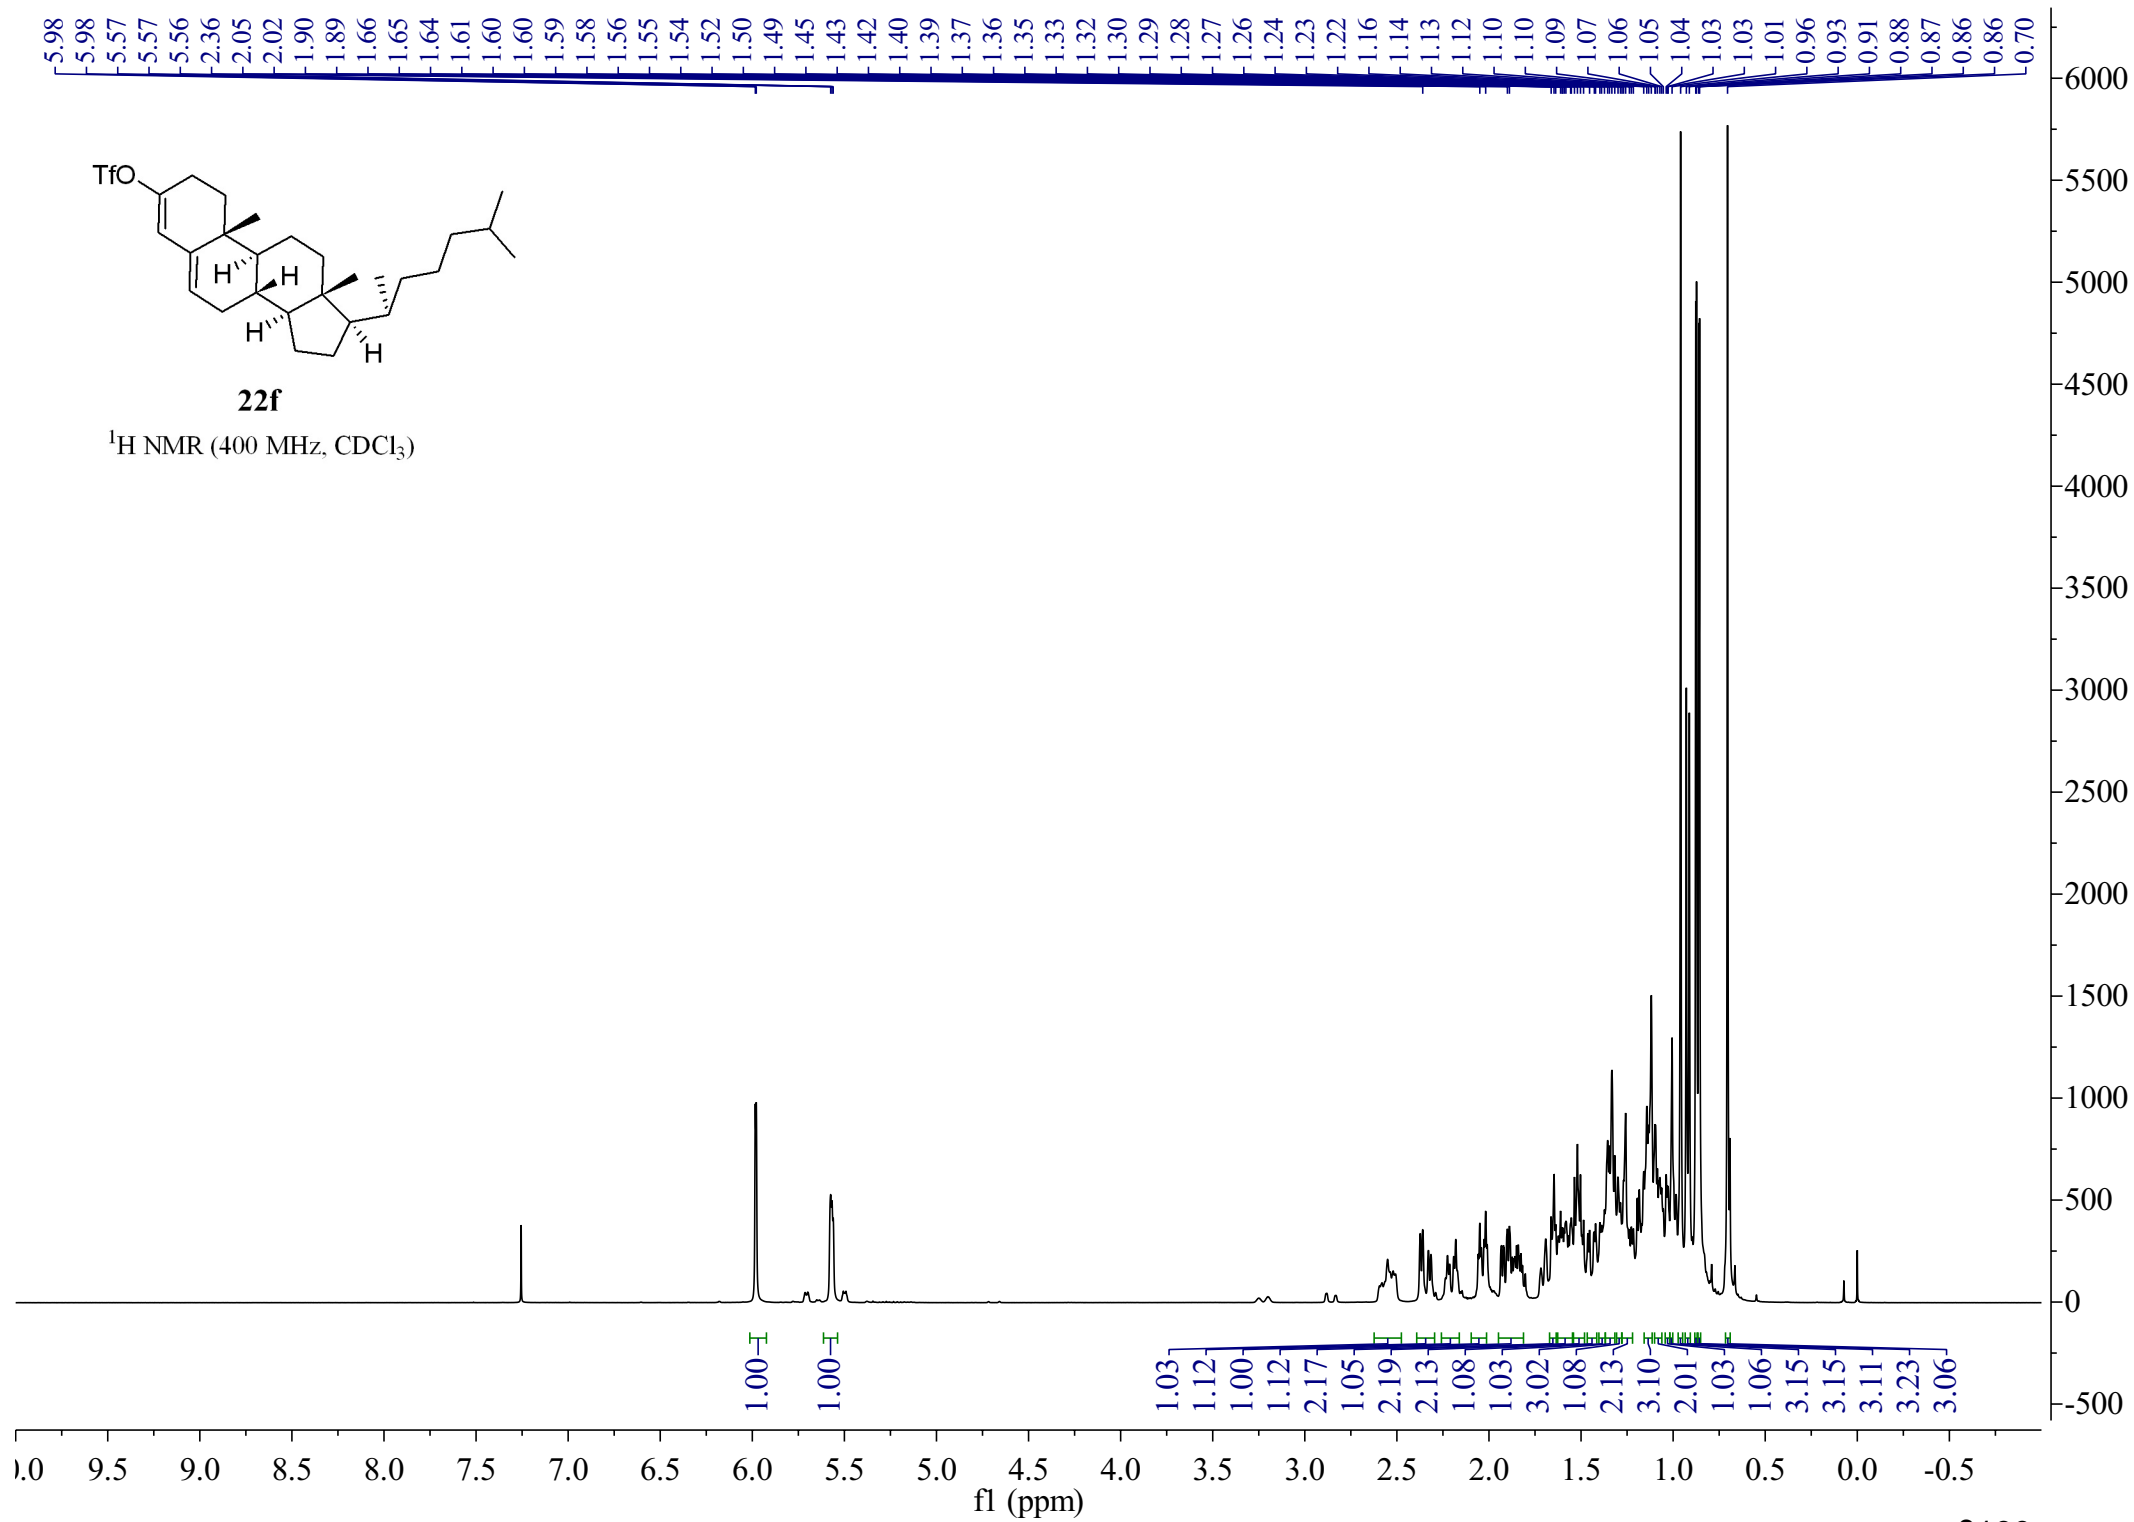

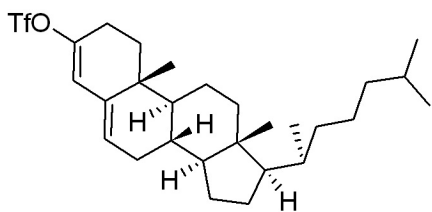

**22f**

$^{19}\text{F}$  NMR (376 MHz,  $\text{CDCl}_3$ )

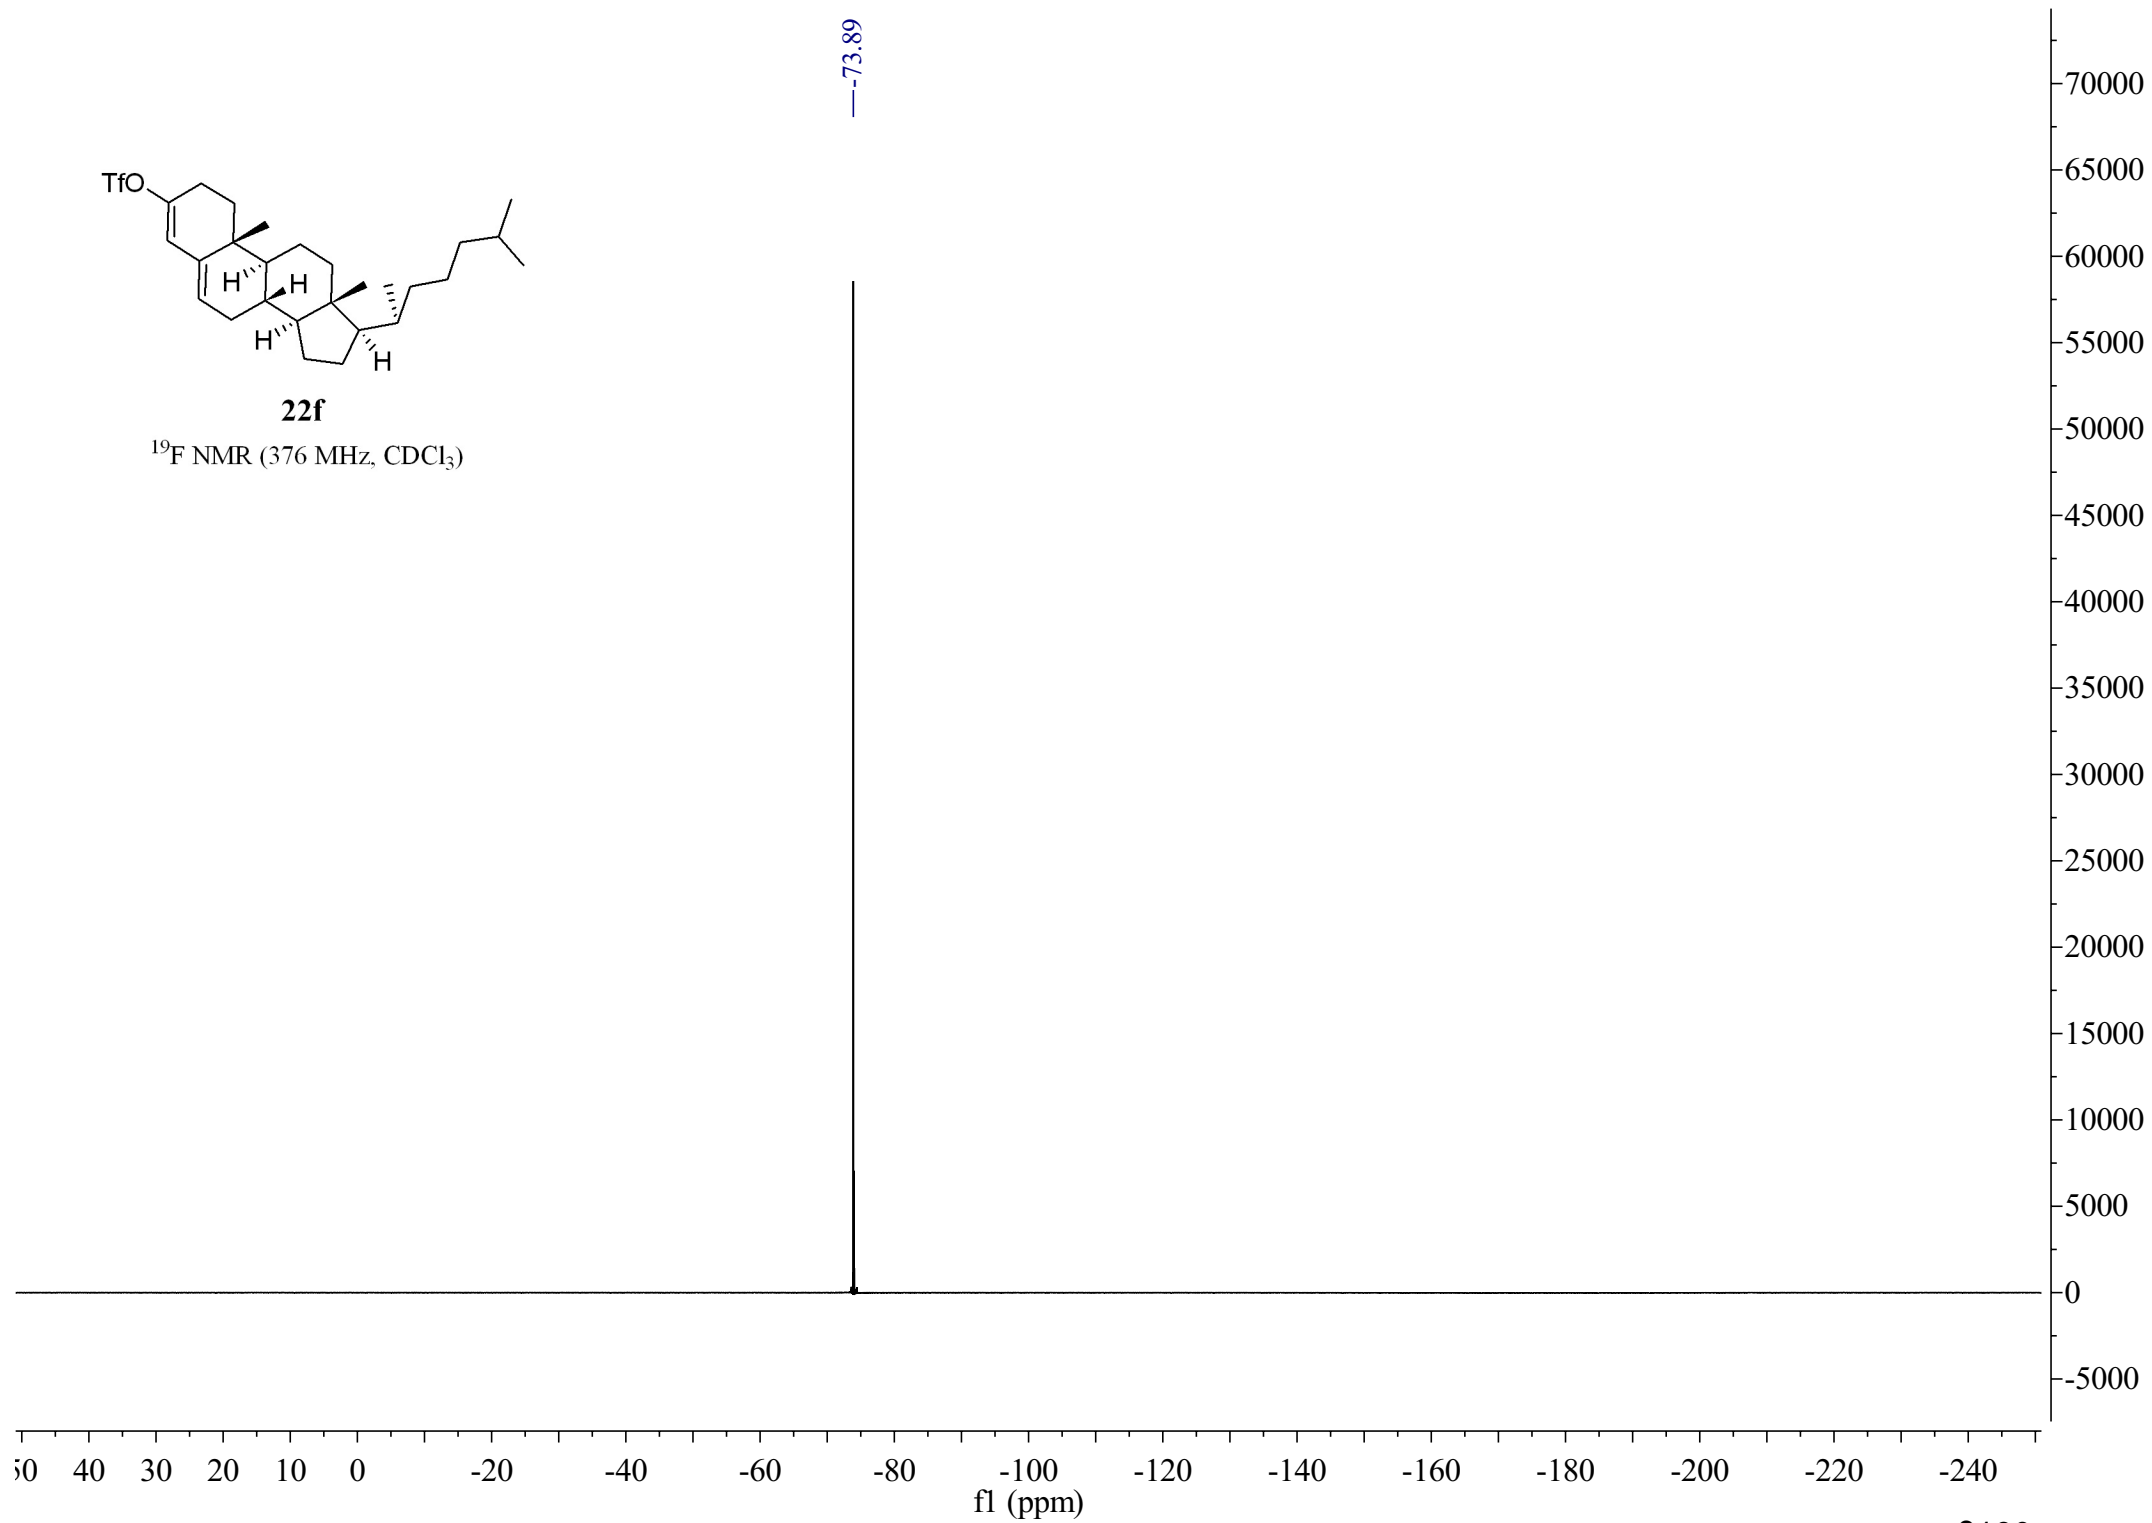

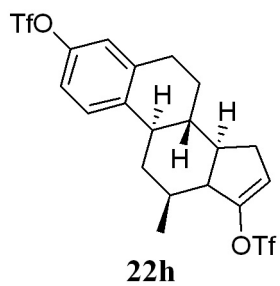

<sup>1</sup>H NMR (400 MHz, CDCl<sub>3</sub>)

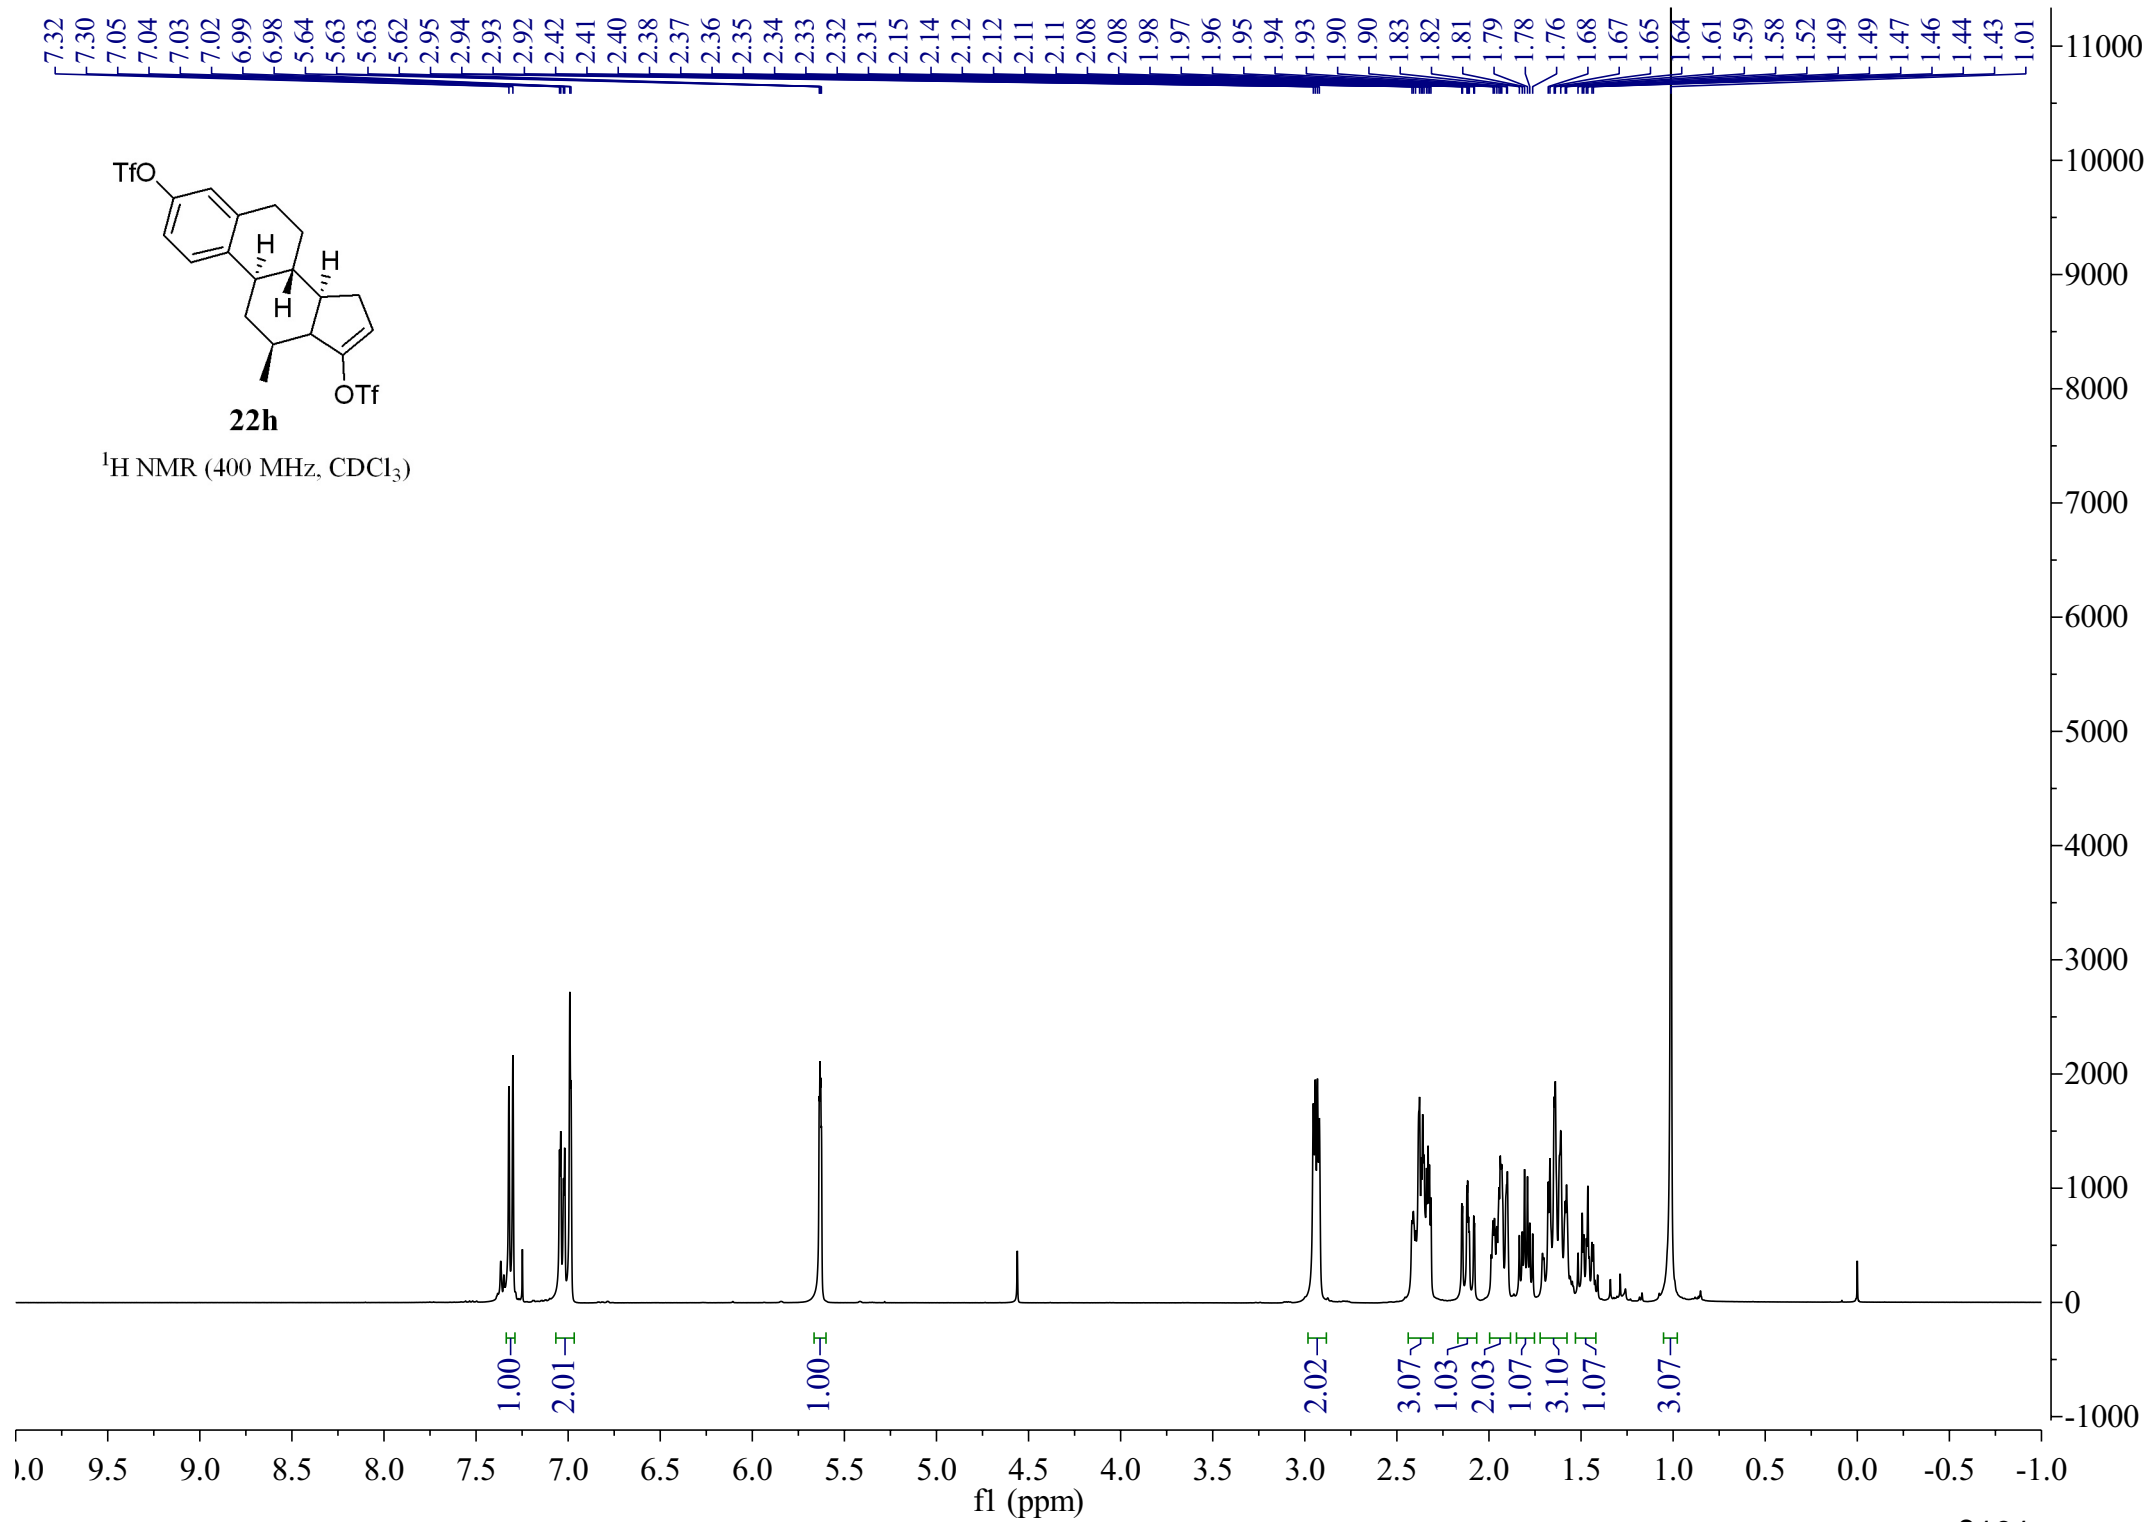

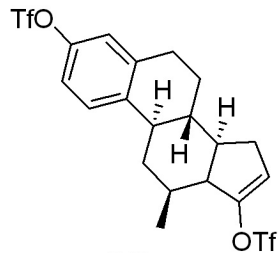

**22h**

$^{13}\text{C}\{^1\text{H}\}$  NMR (100 MHz,  $\text{CDCl}_3$ )

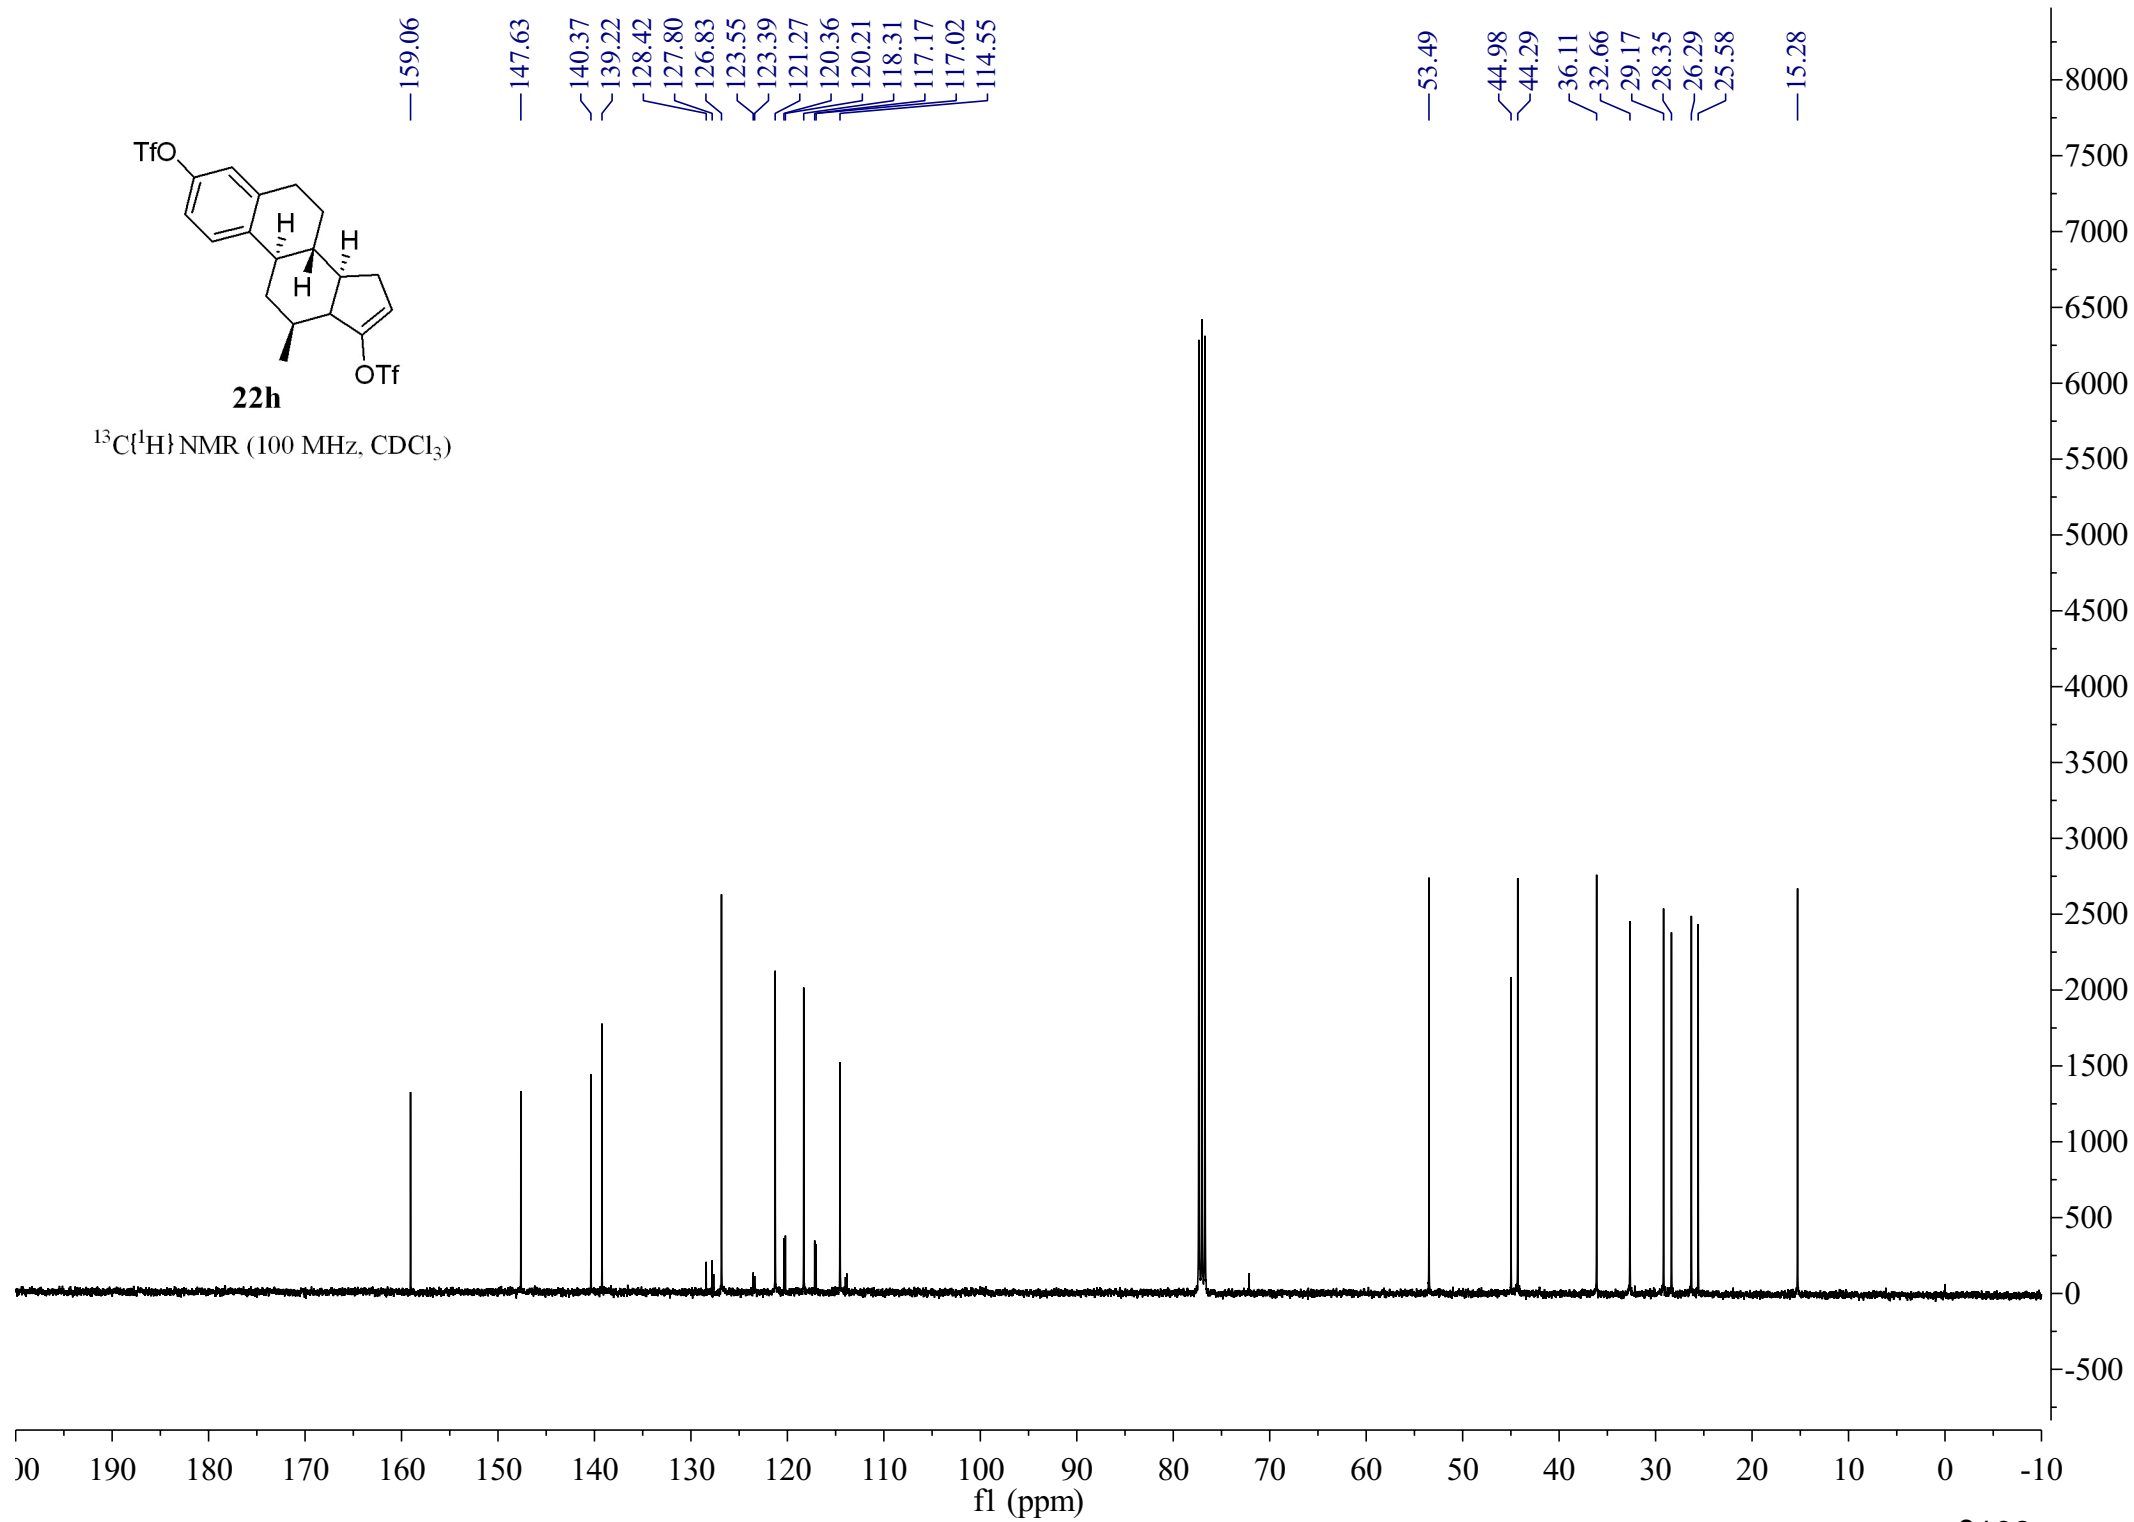

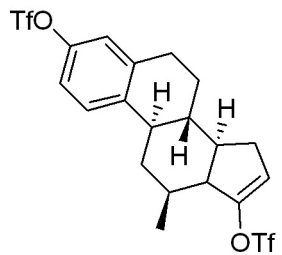

**22h**

<sup>19</sup>F NMR (376 MHz, CDCl<sub>3</sub>)

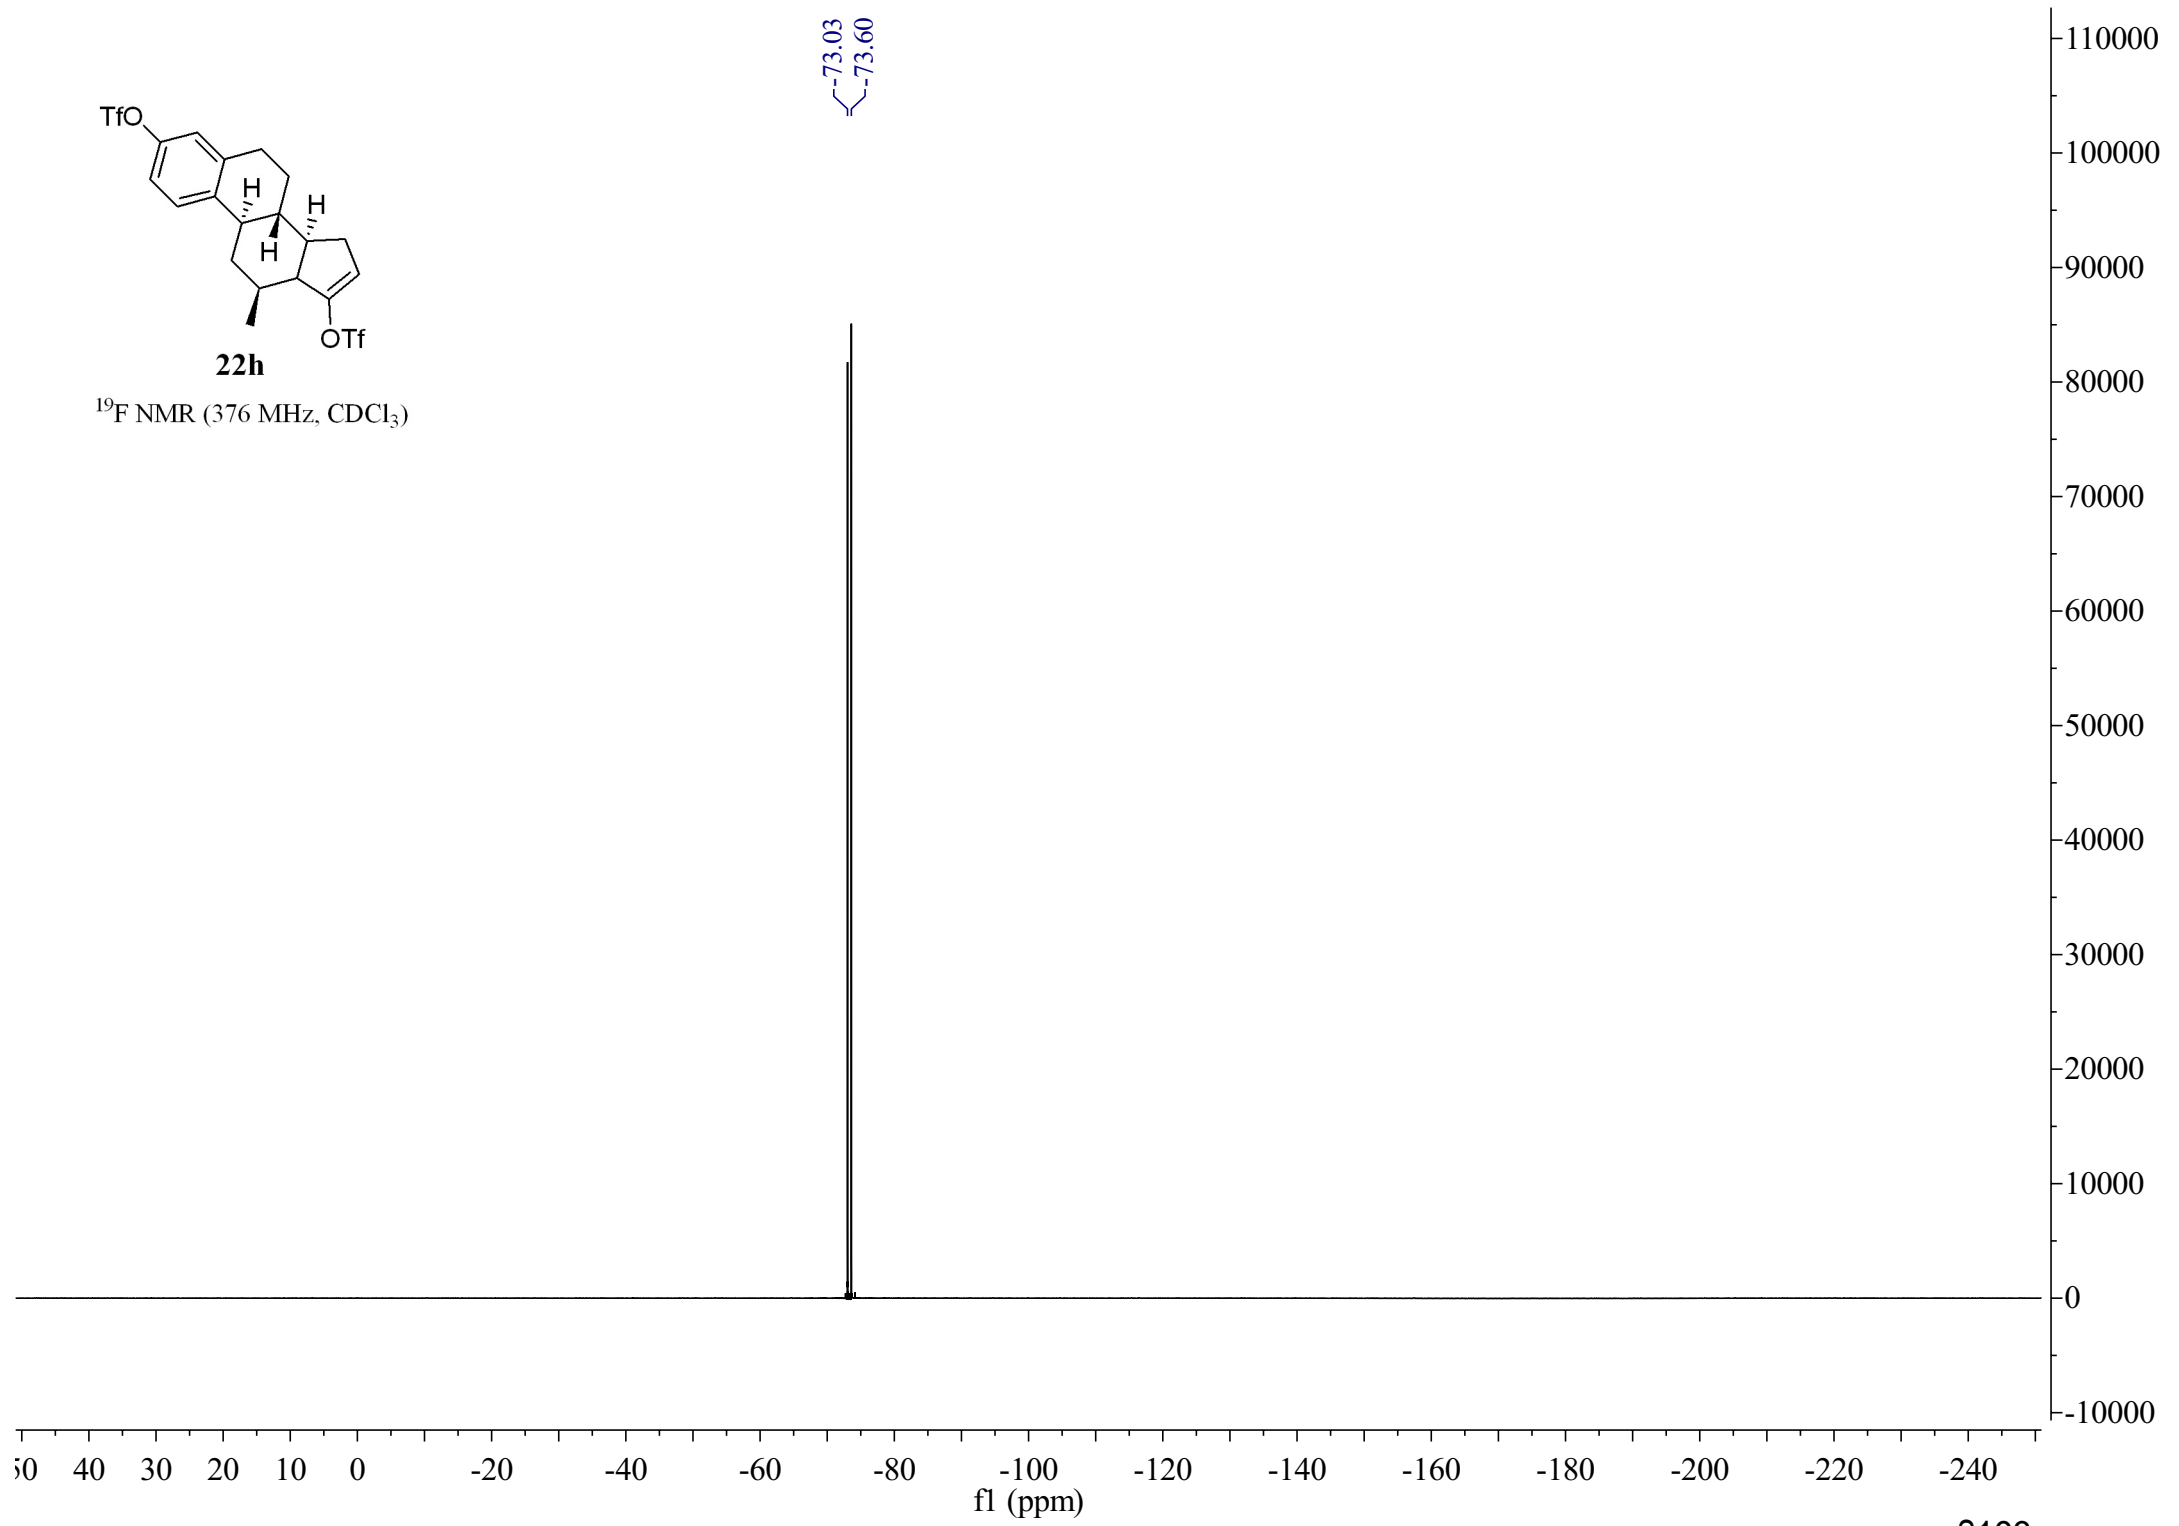



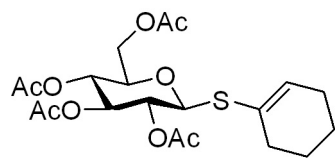

**23a**

$^1\text{H}$  NMR (400 MHz,  $\text{CDCl}_3$ )

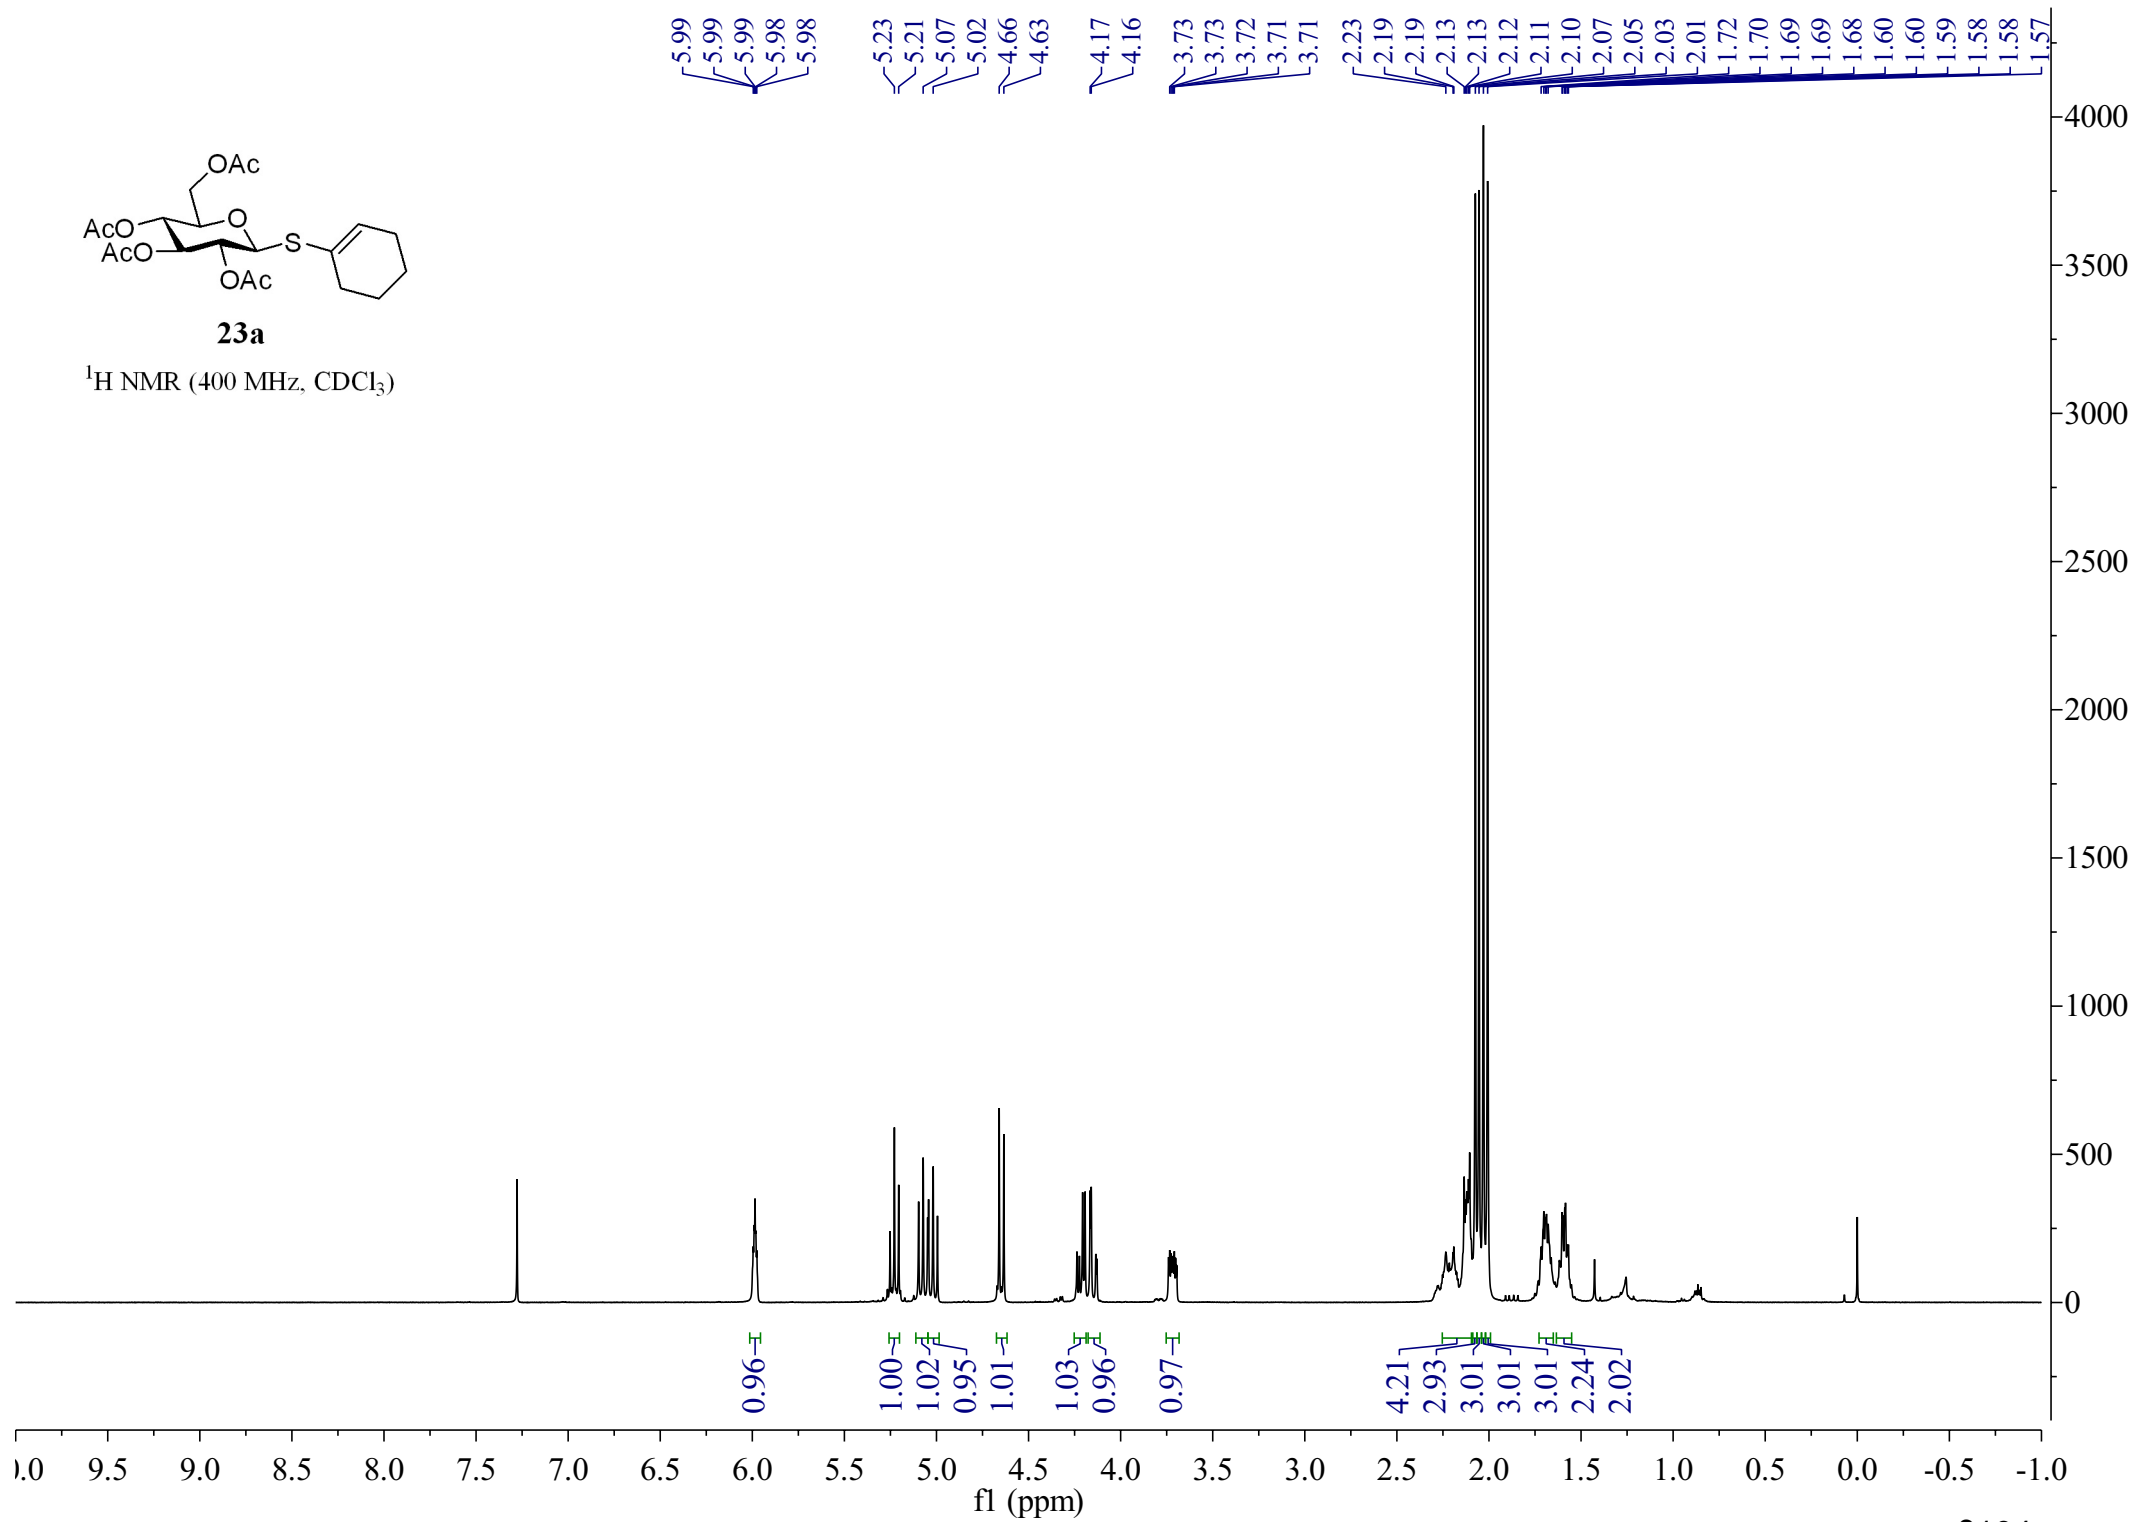

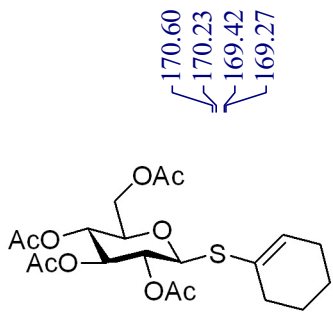

**23a**

$^{13}\text{C}\{^1\text{H}\}$  NMR (100 MHz,  $\text{CDCl}_3$ )

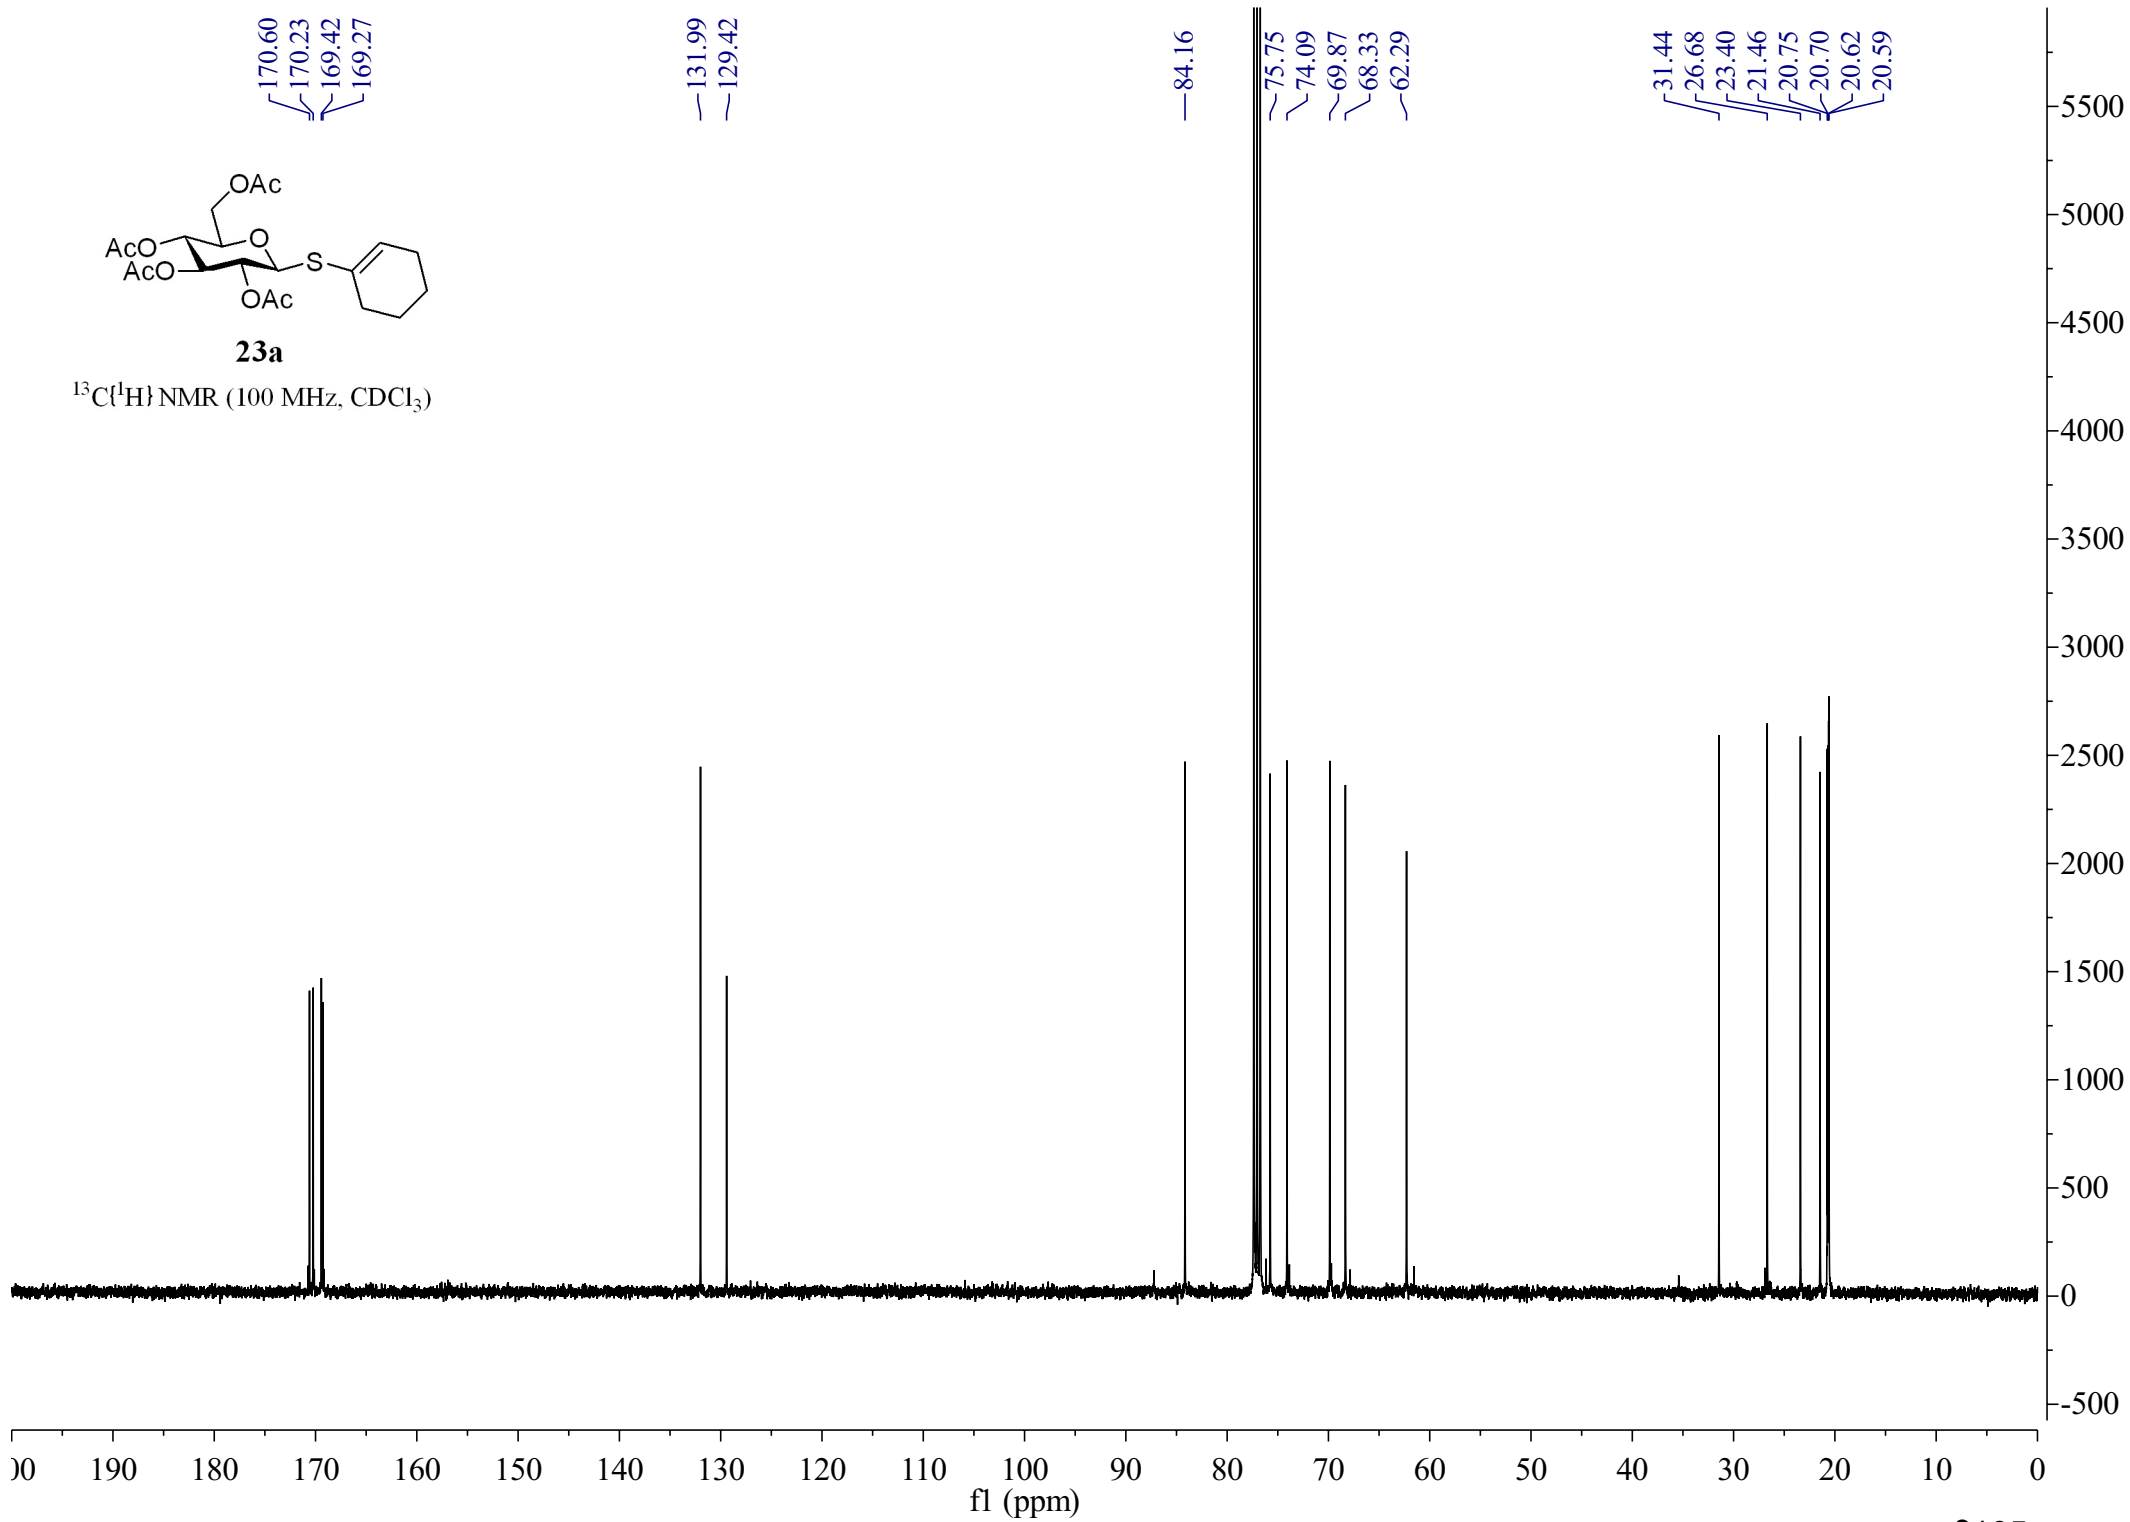

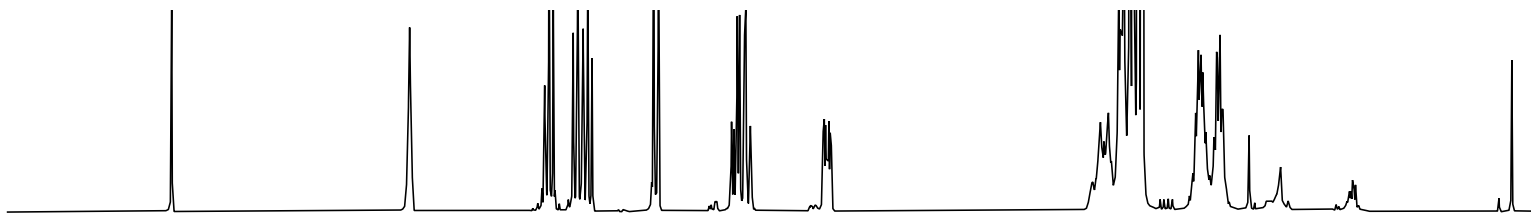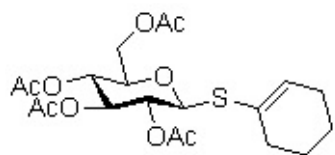

23a

$^1\text{H}$ - $^1\text{H}$  COSY (400 MHz,  $\text{CDCl}_3$ )

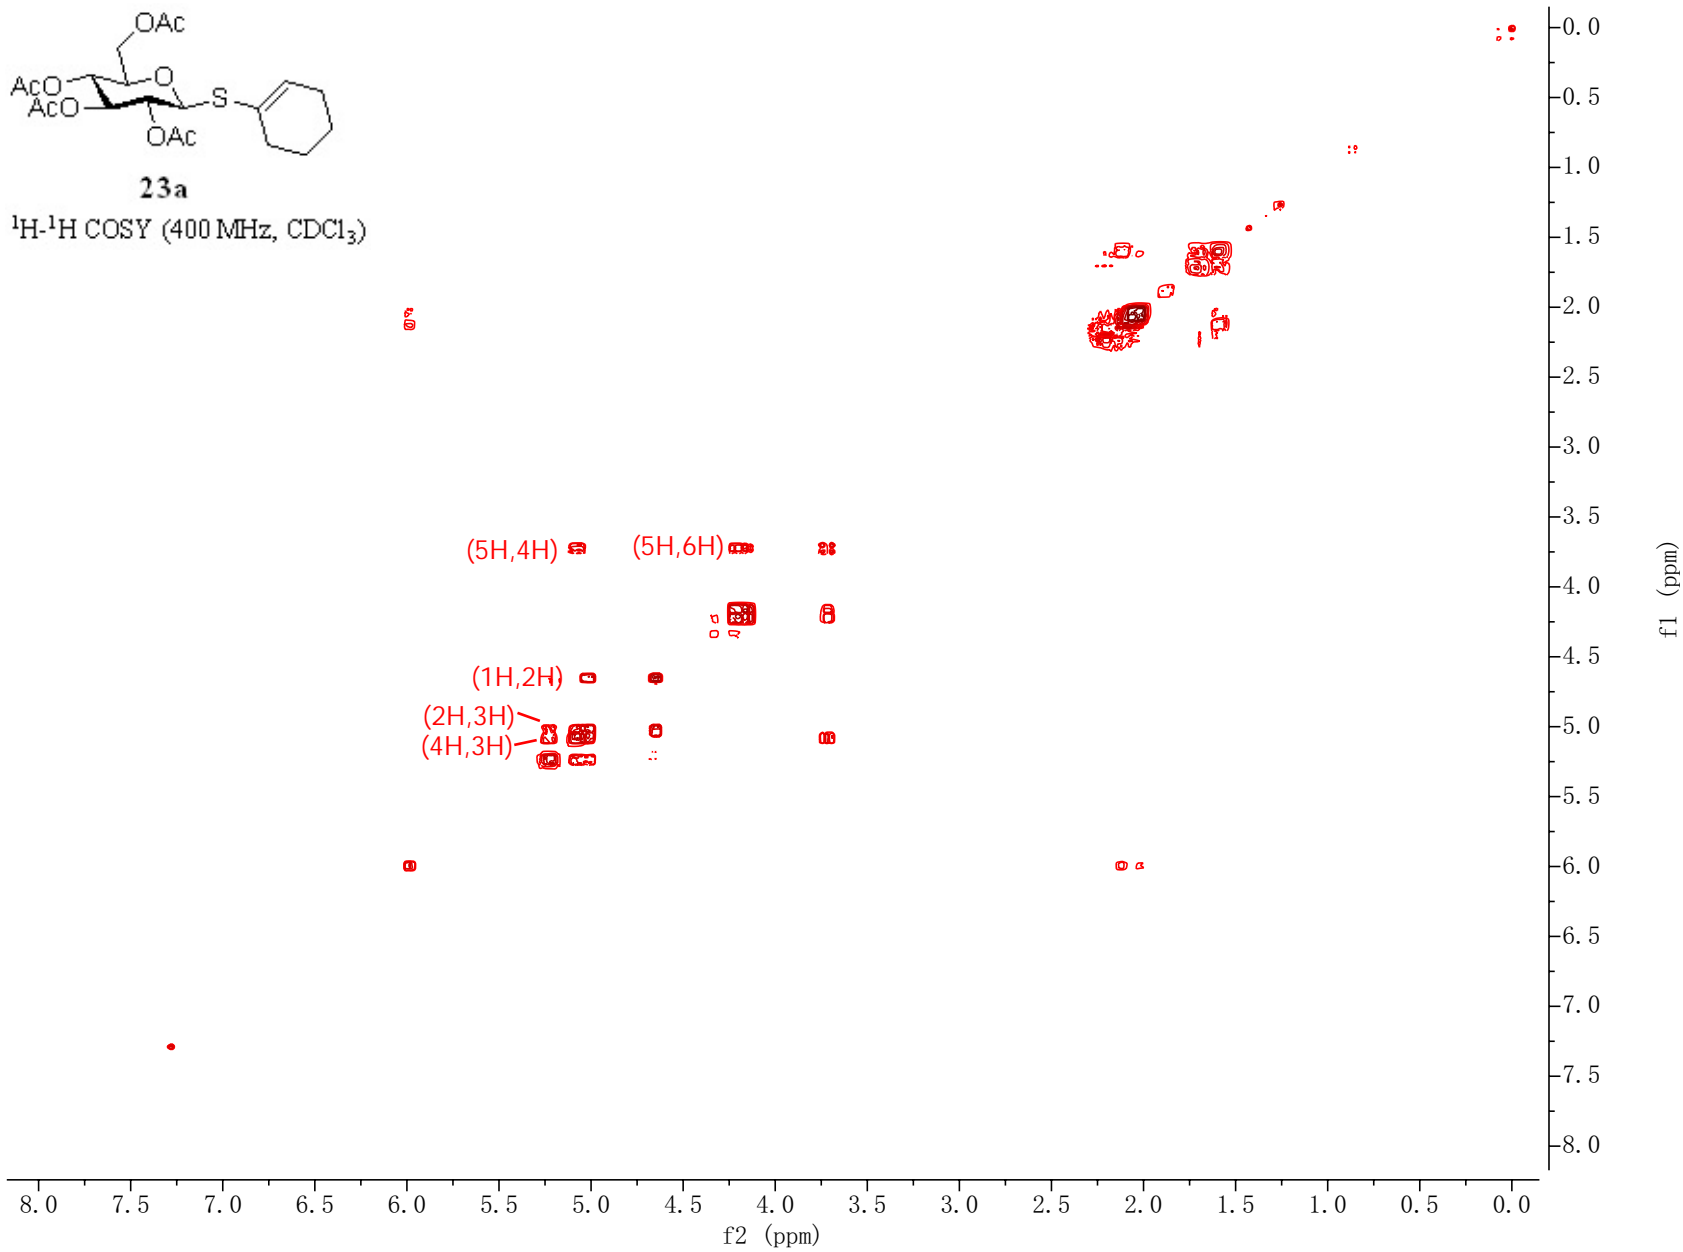

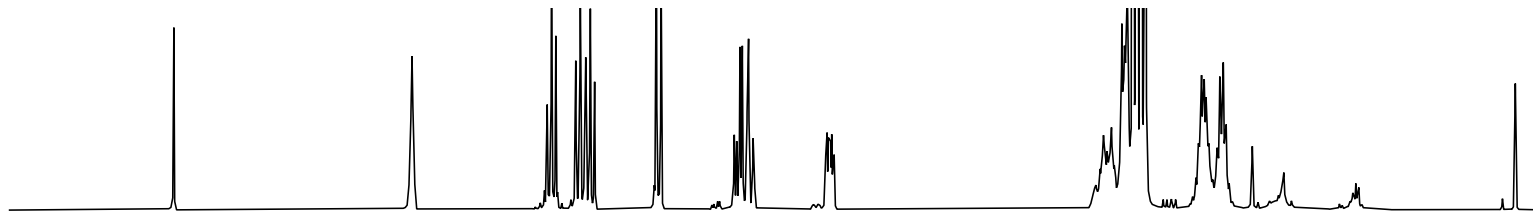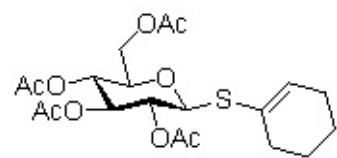

23a

HSQC (400 MHz, CDCl<sub>3</sub>)

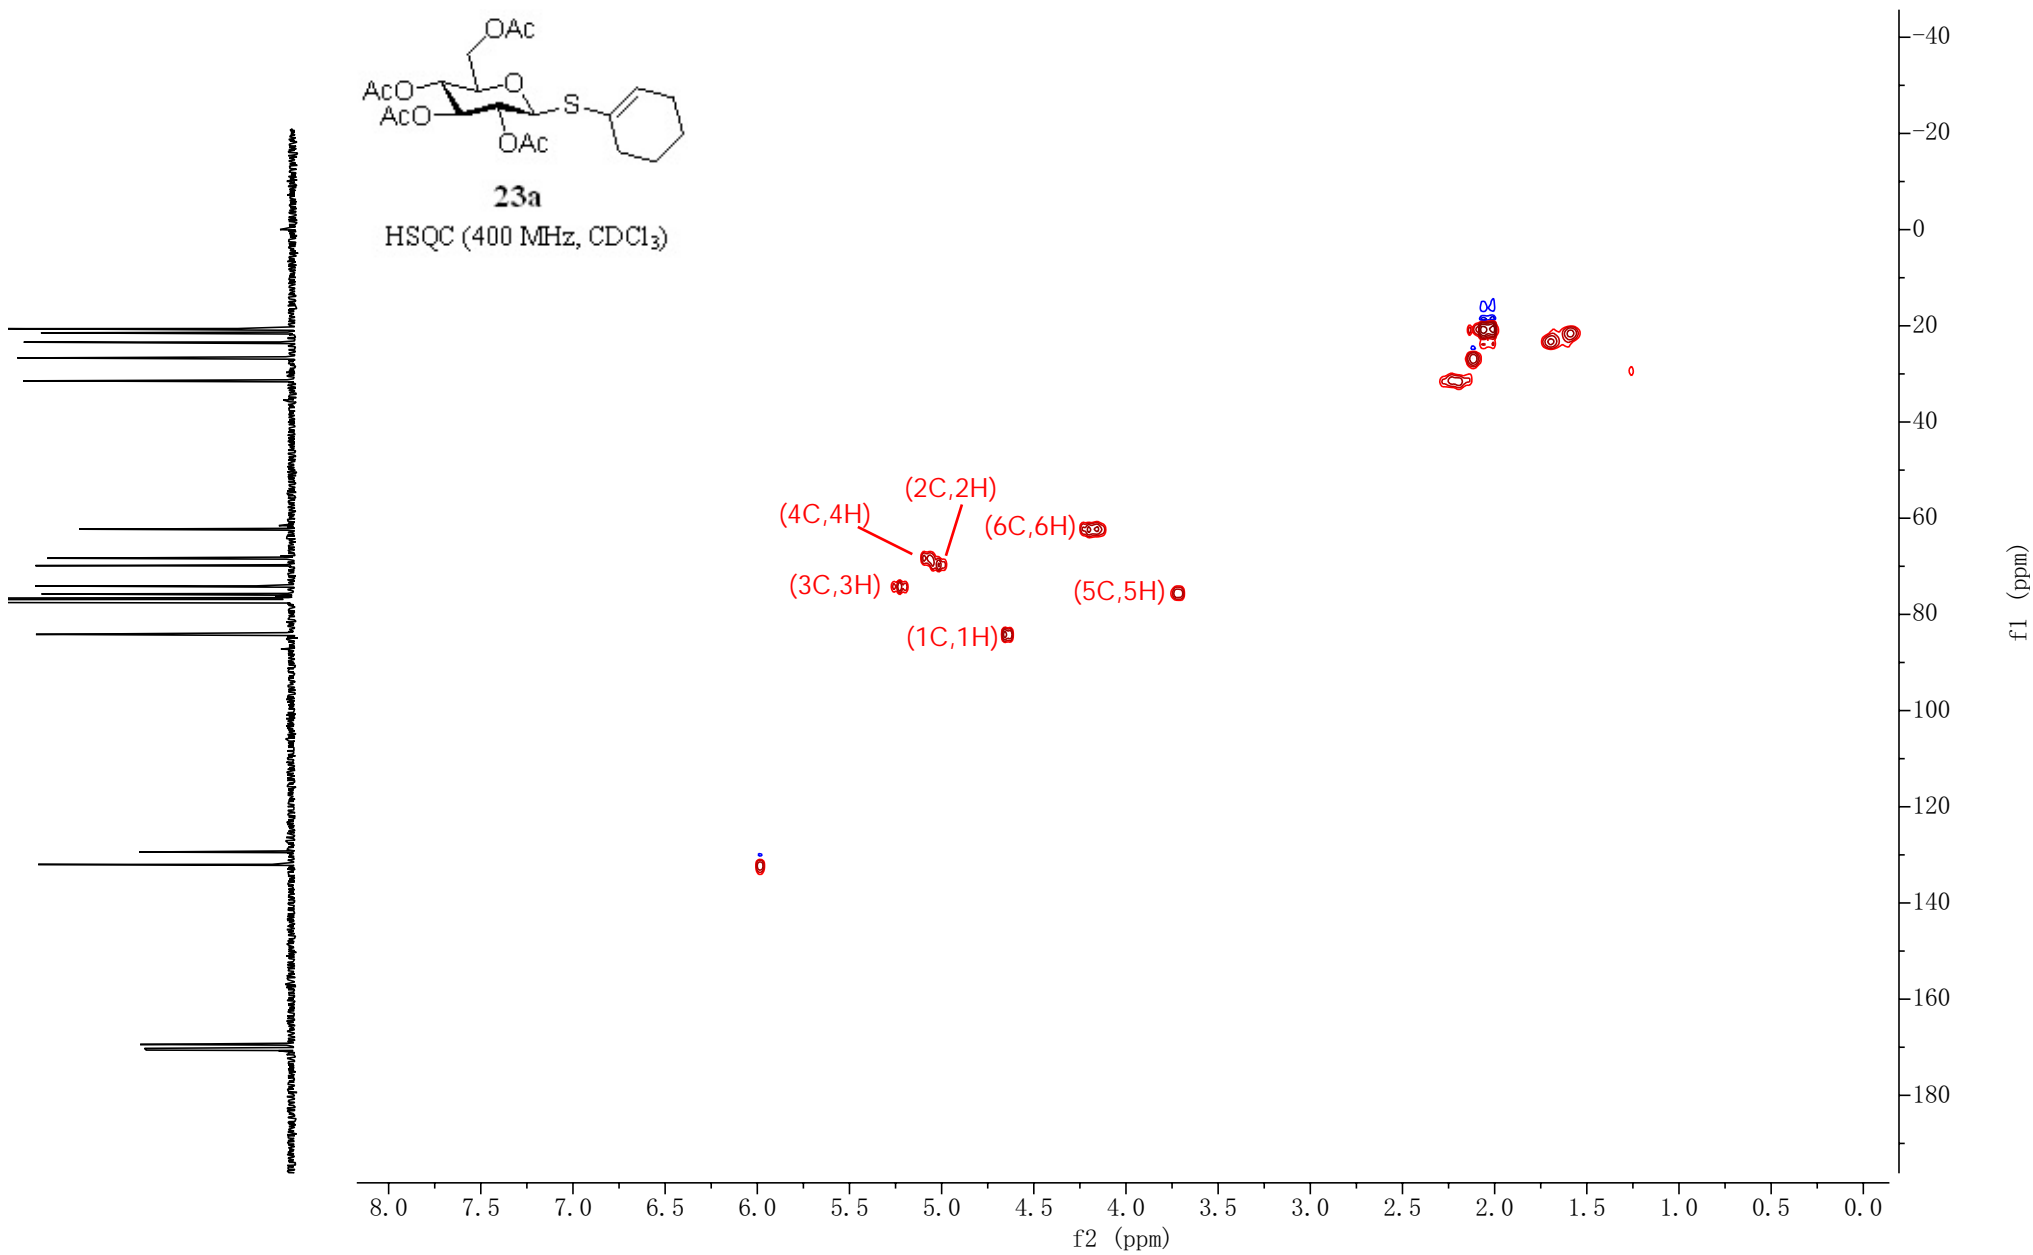

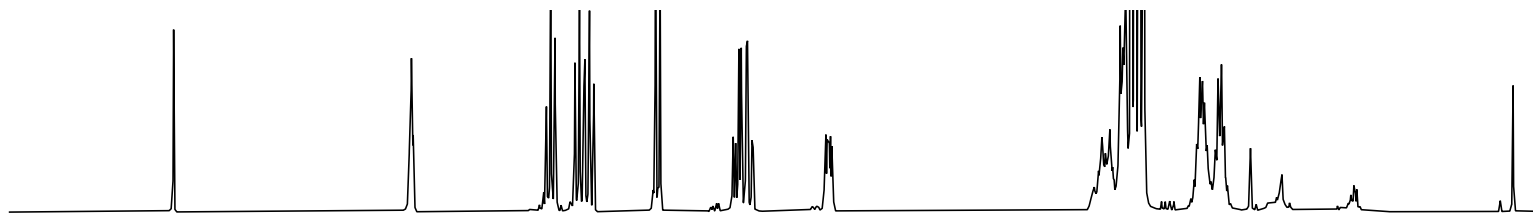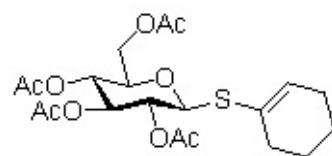

23a

HMBC (400 MHz, CDCl<sub>3</sub>)

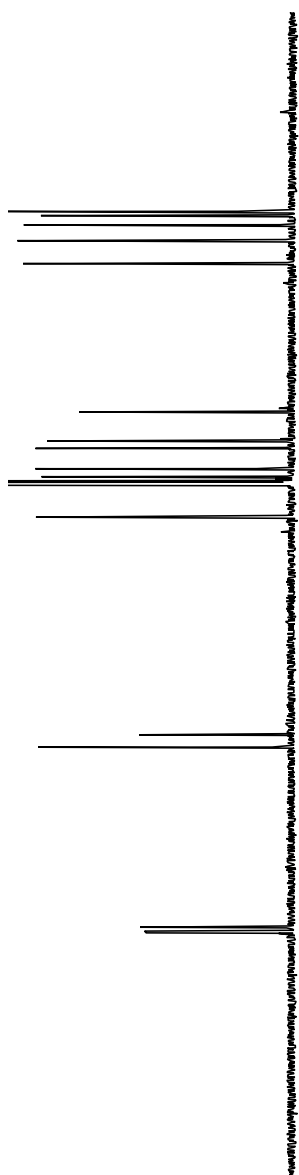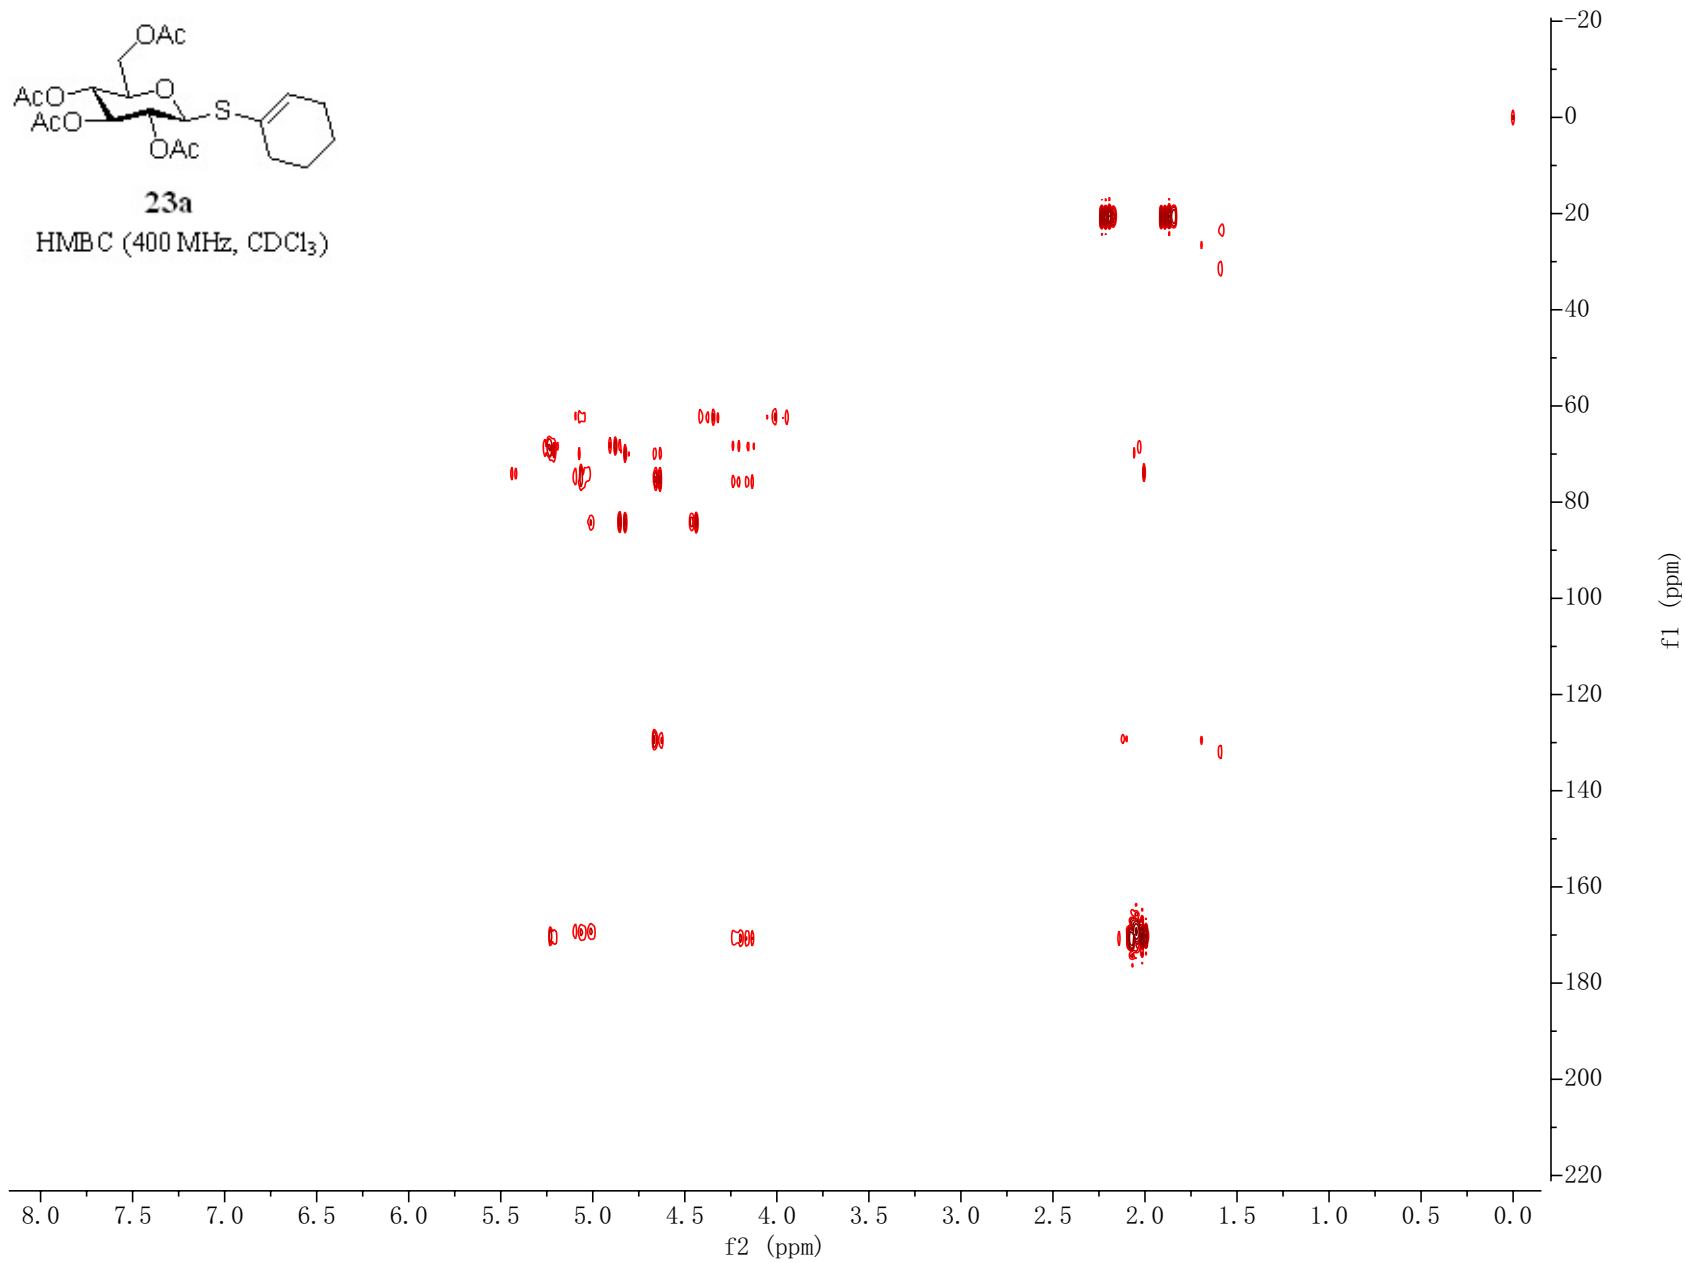

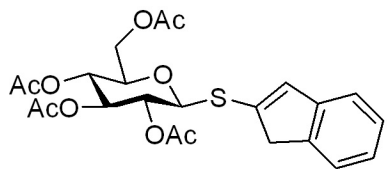

**23b**

$^1\text{H}$  NMR (400 MHz,  $\text{CDCl}_3$ )

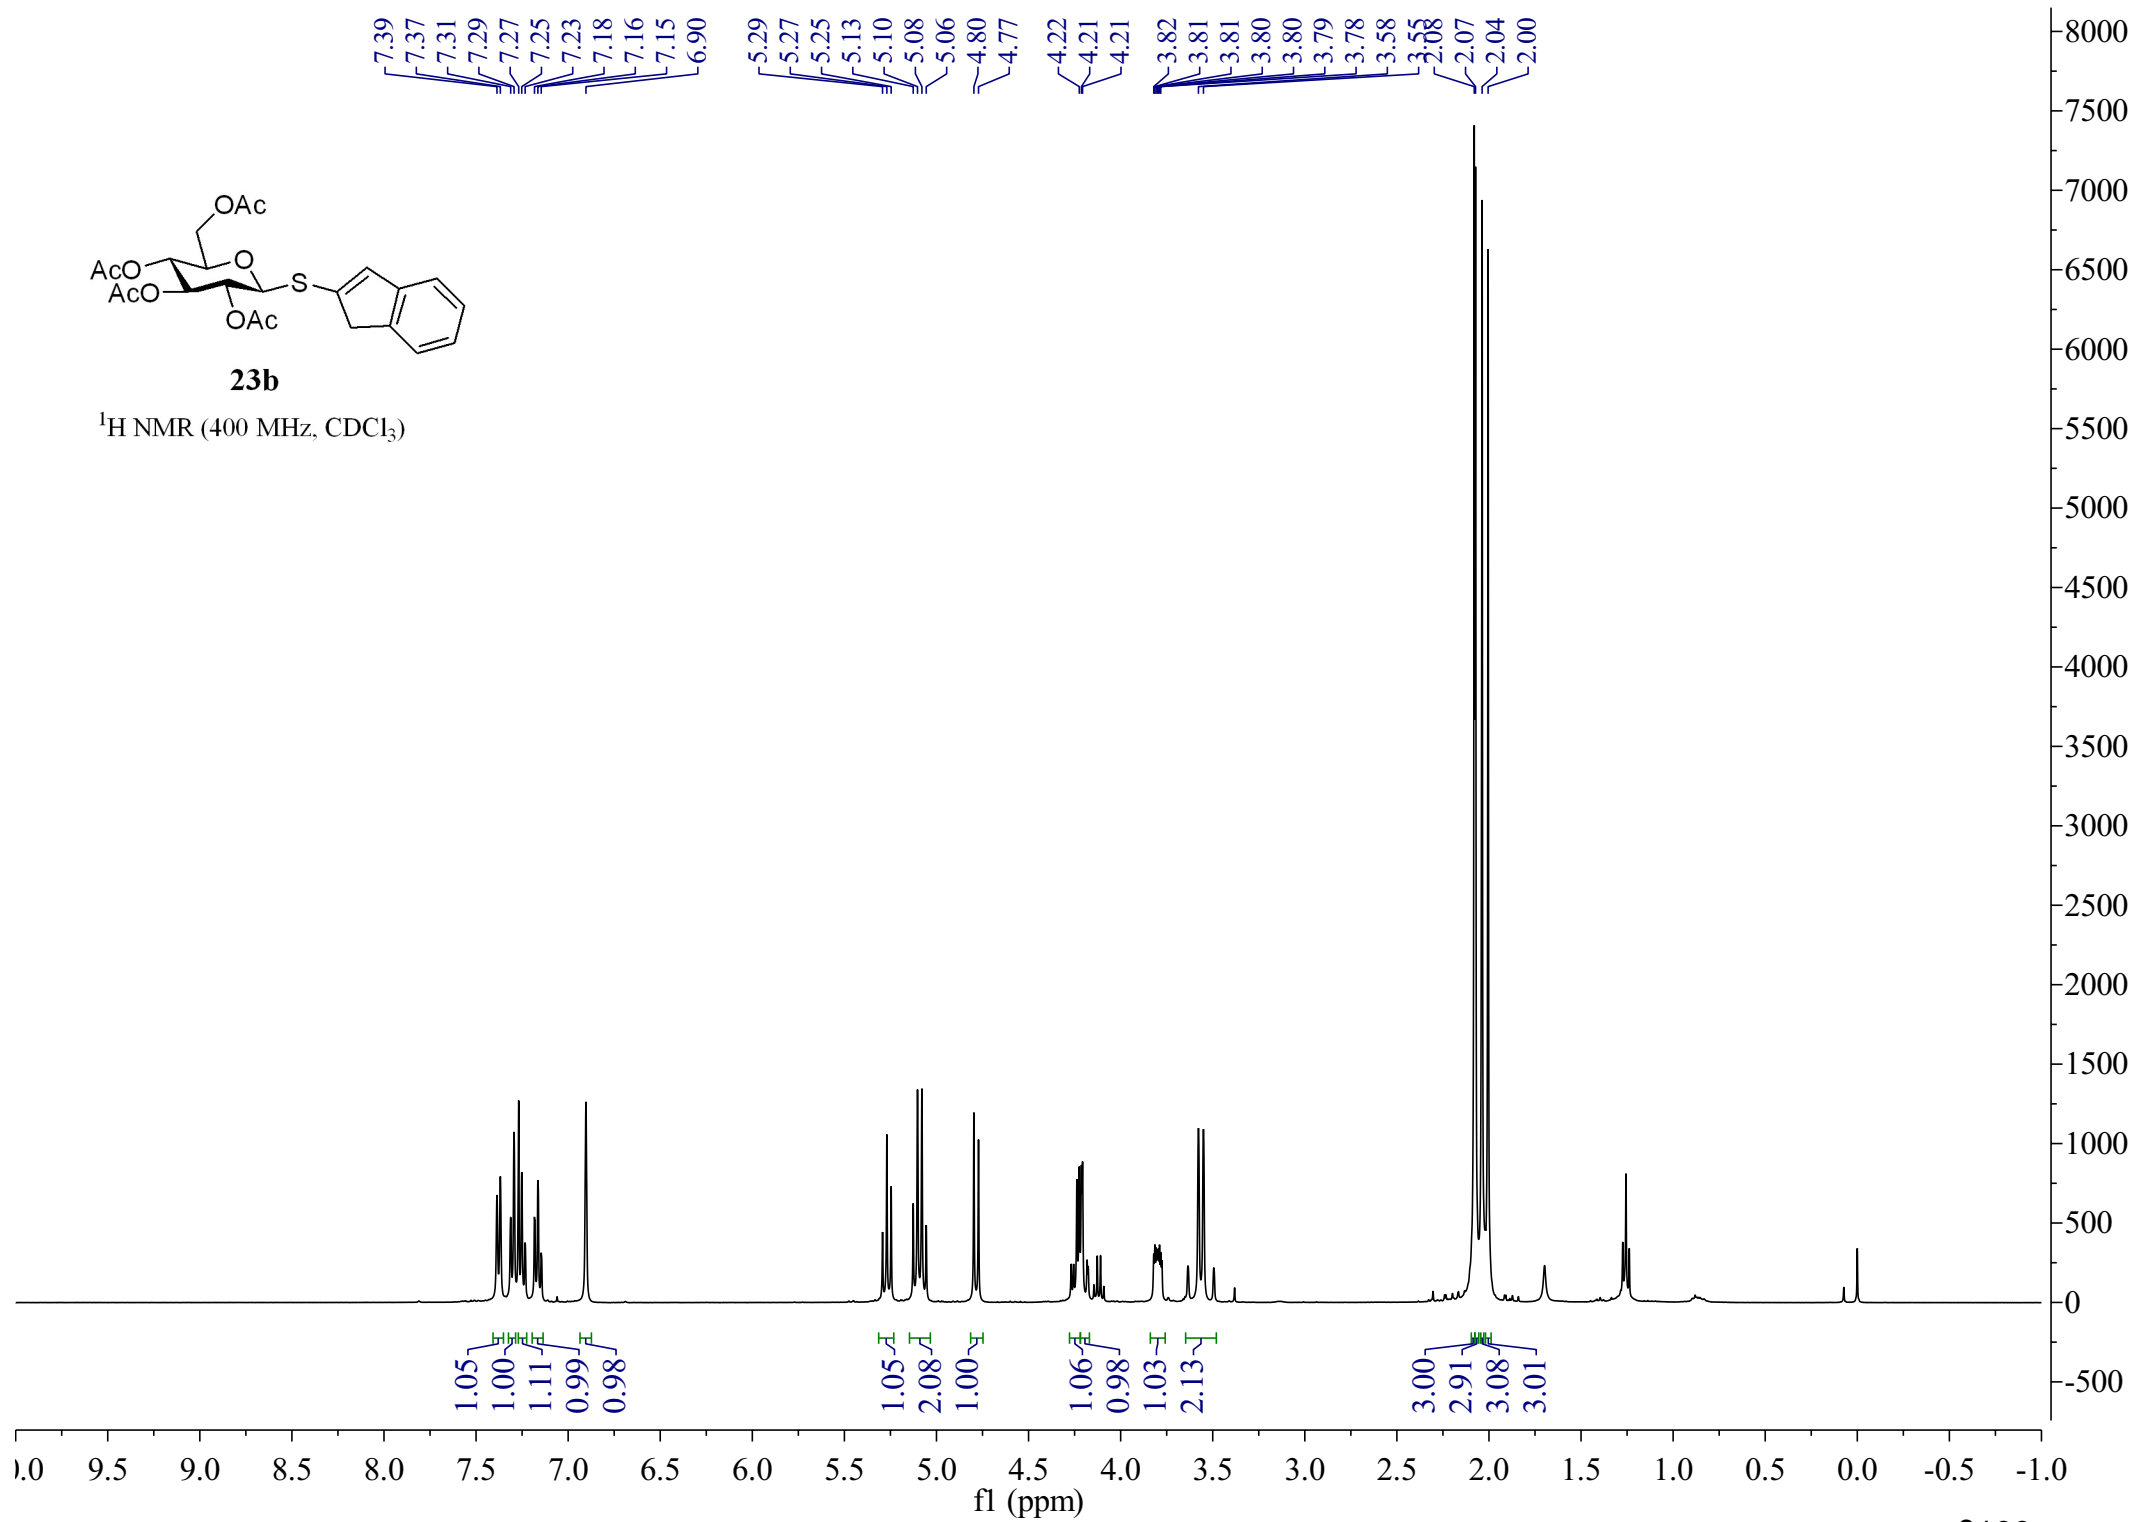

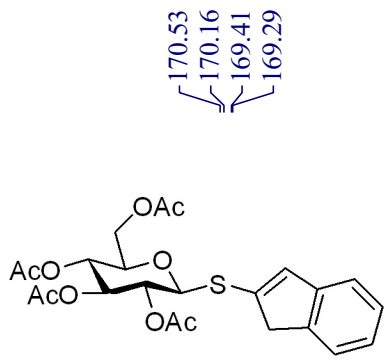

**23b**

$^{13}\text{C}\{^1\text{H}\}$  NMR (100 MHz,  $\text{CDCl}_3$ )

170.53  
170.16  
169.41  
169.29

144.11  
143.37  
136.89  
133.45  
126.67  
124.85  
123.28  
120.42

84.05  
75.90  
73.80  
69.91  
68.19  
62.19

43.65

20.71  
20.58

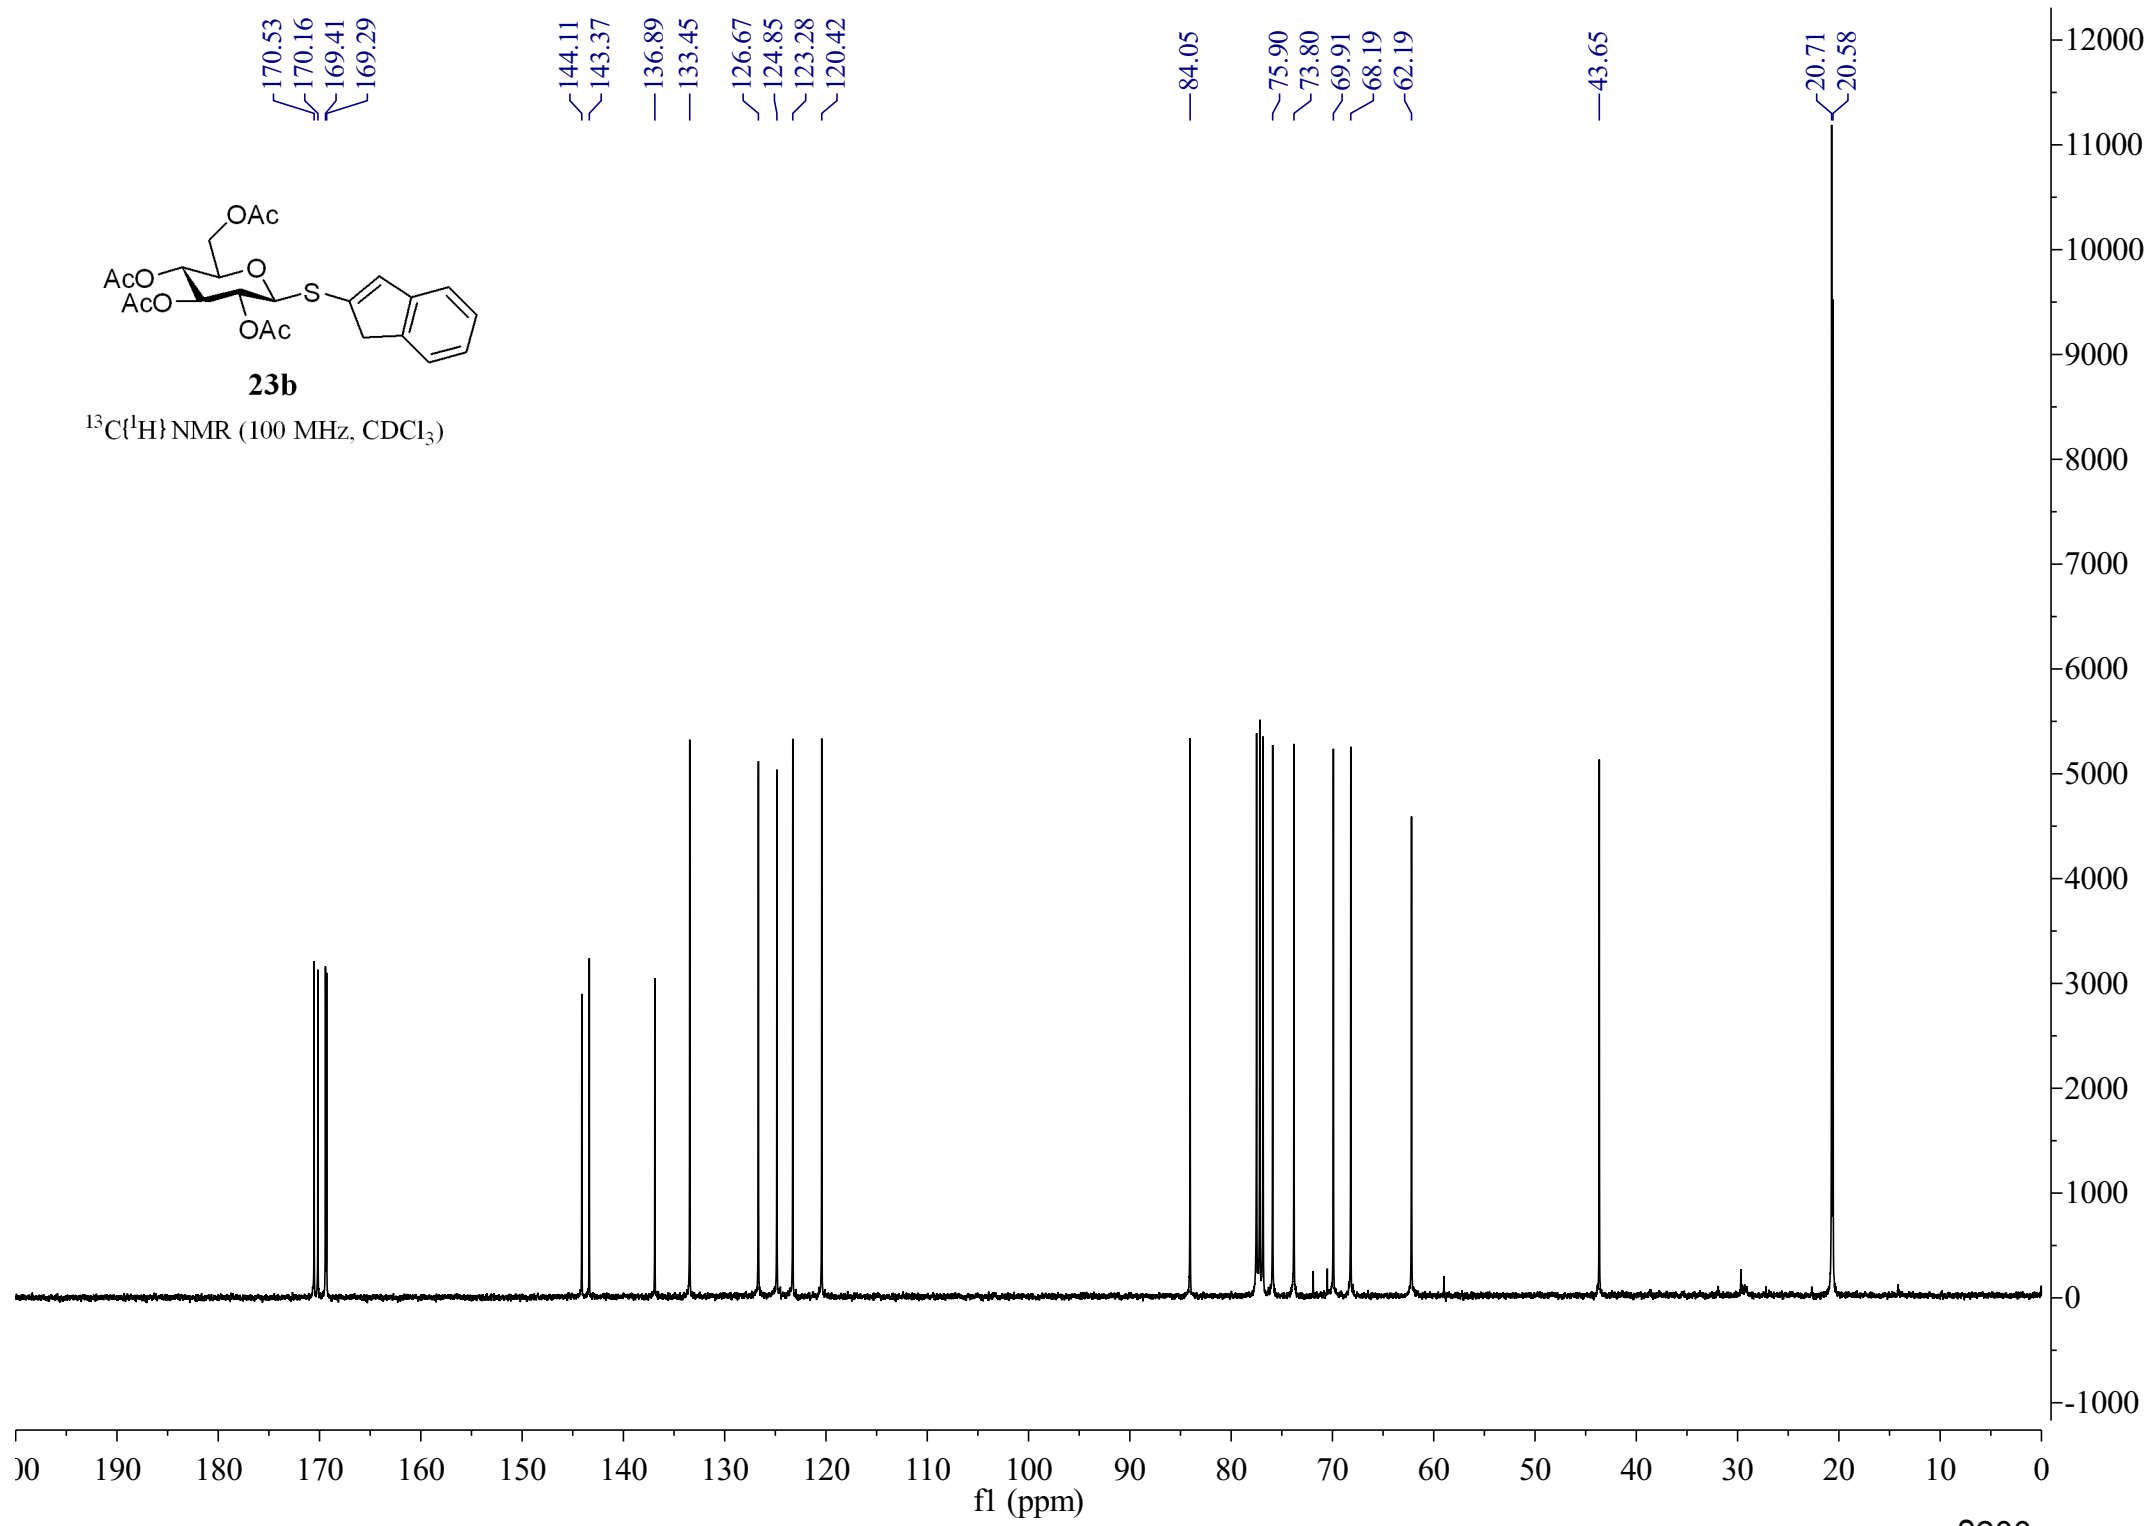

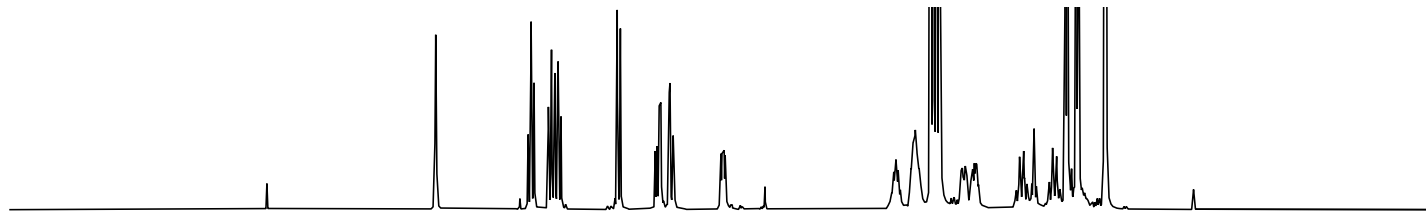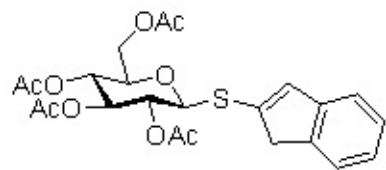

**23b**

$^1\text{H}$ - $^1\text{H}$  COSY (400 MHz,  $\text{CDCl}_3$ )

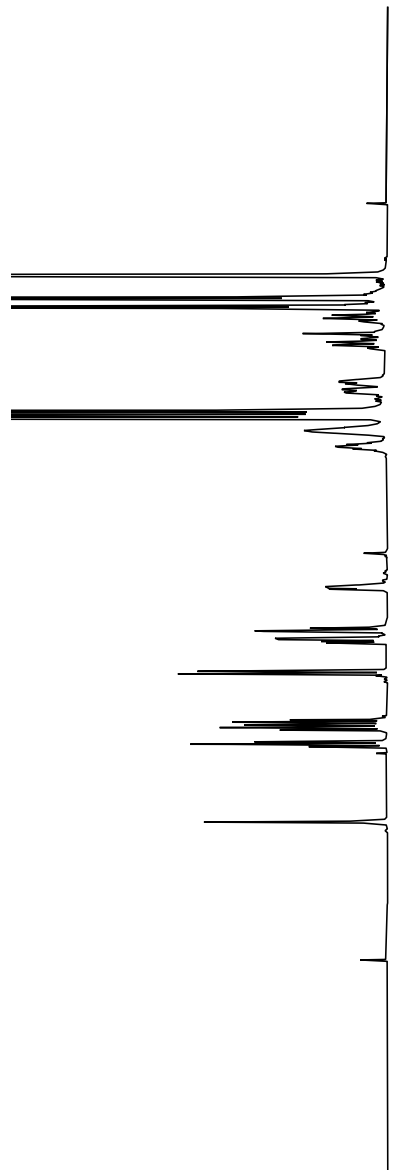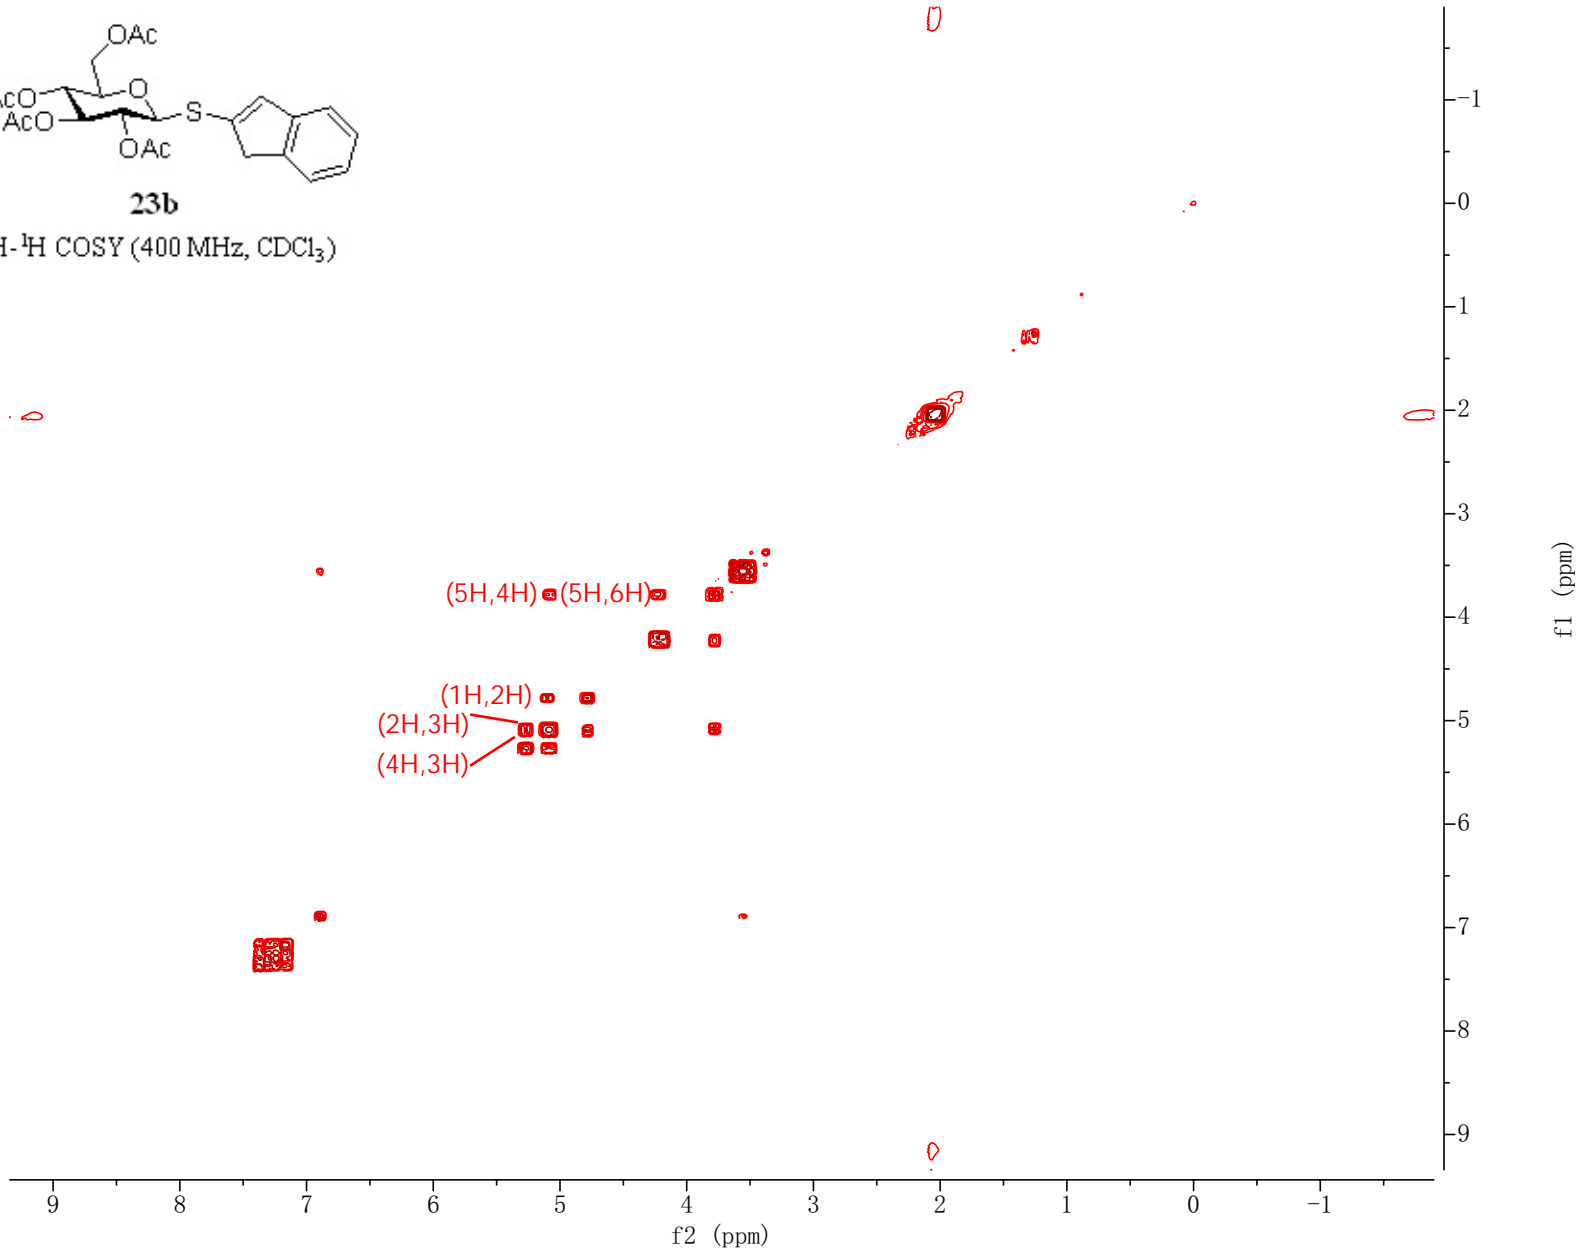



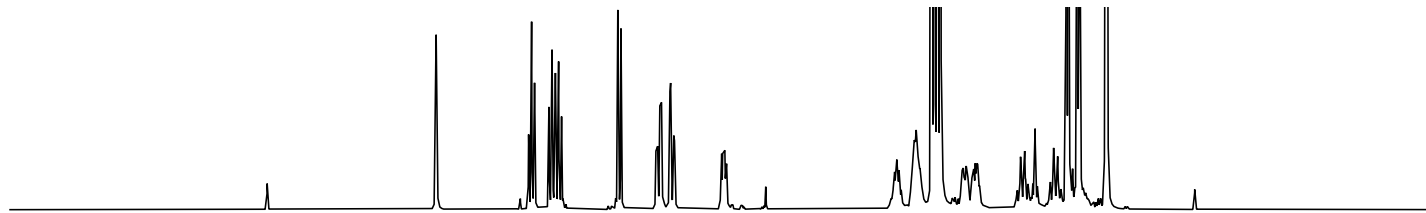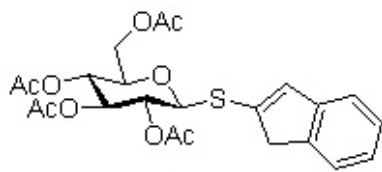

23b

HSQC (400 MHz, CDCl<sub>3</sub>)

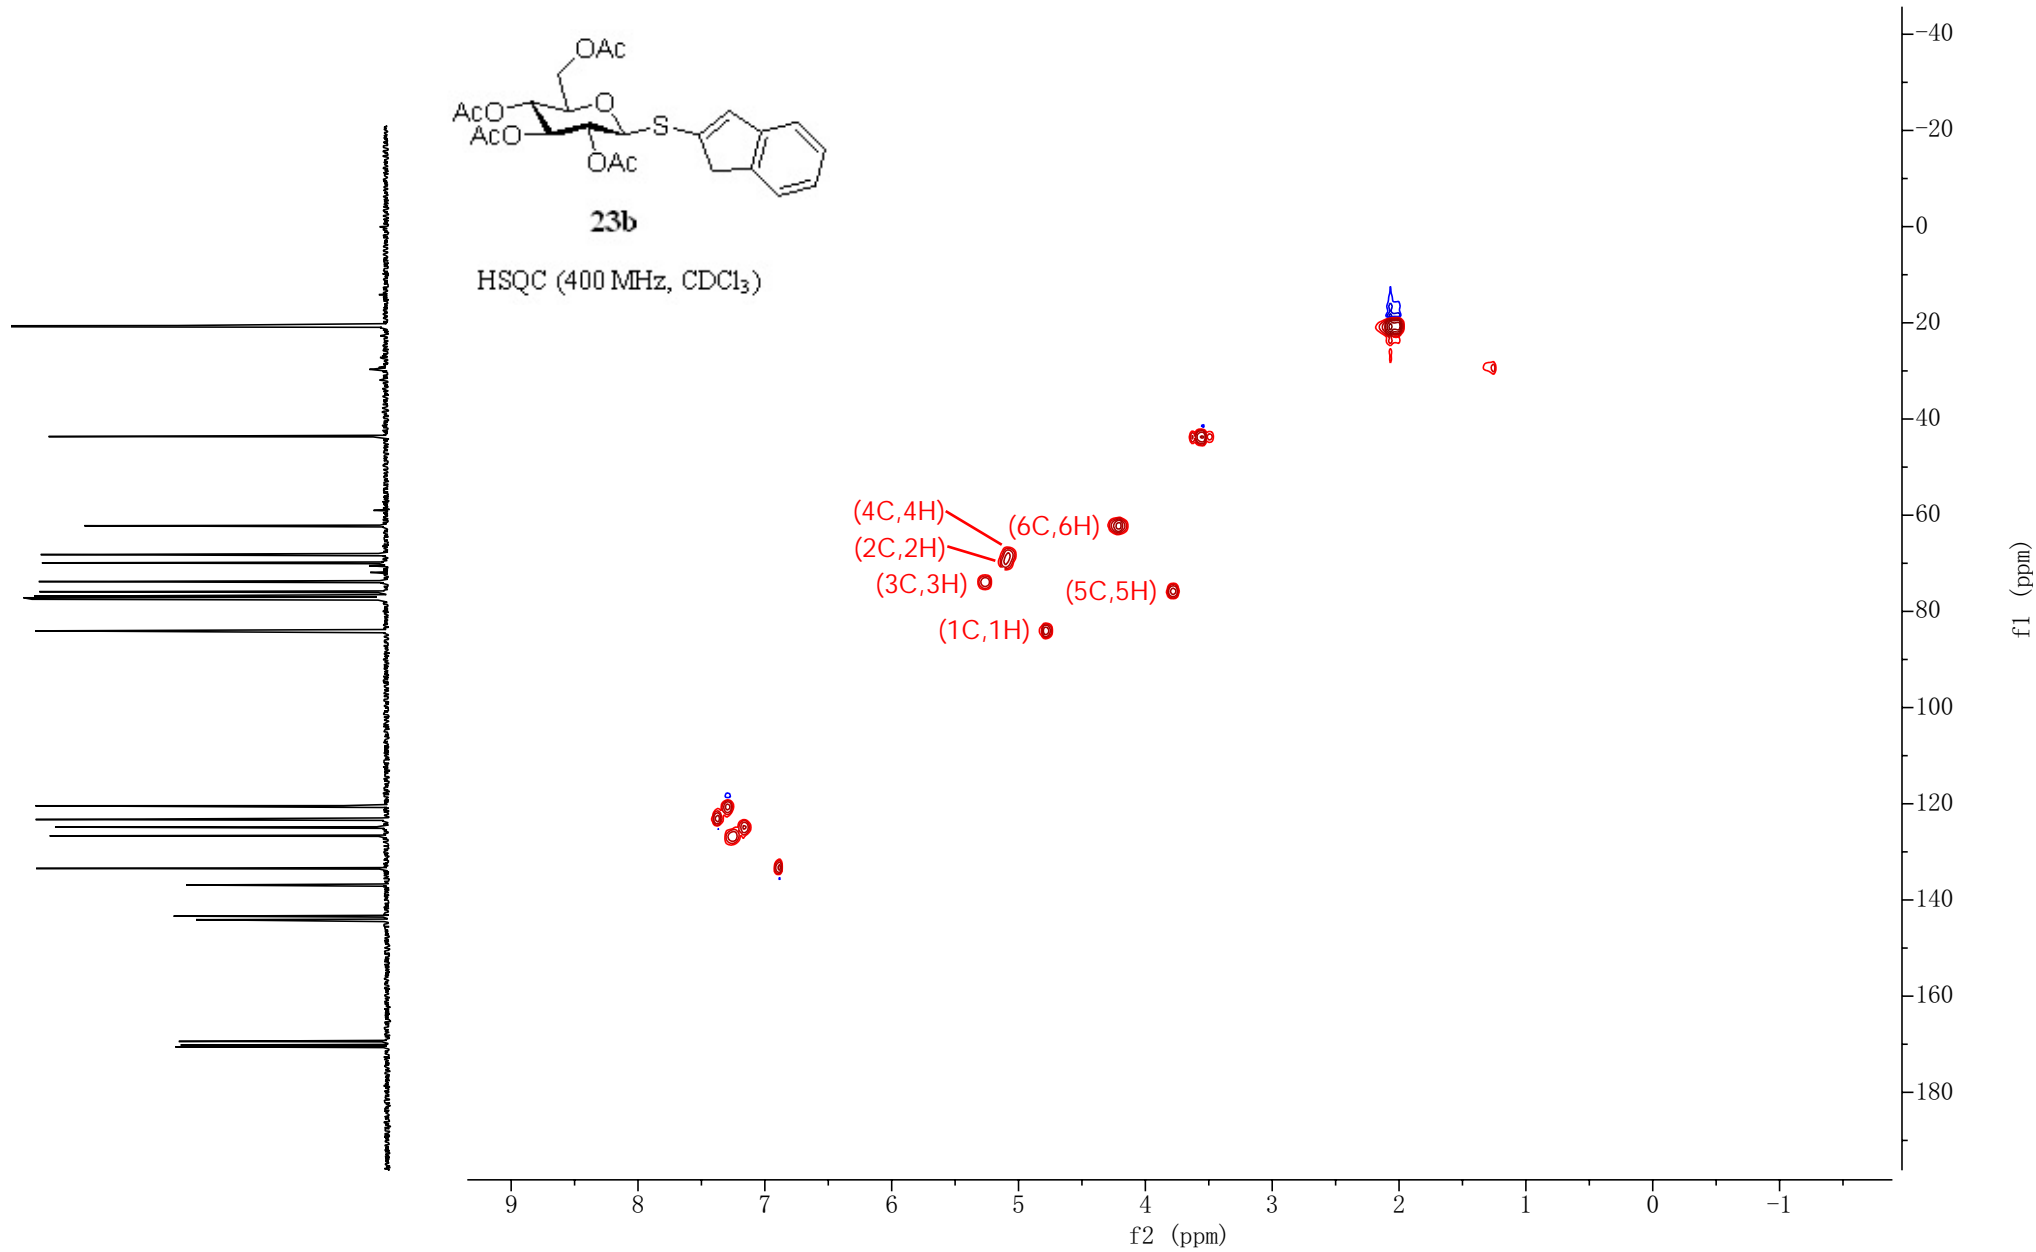

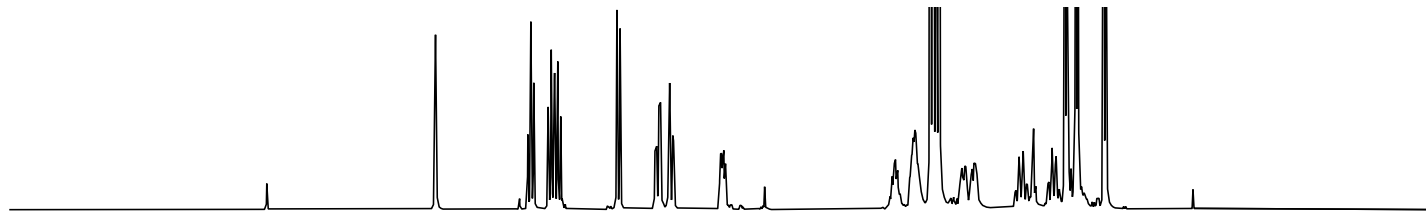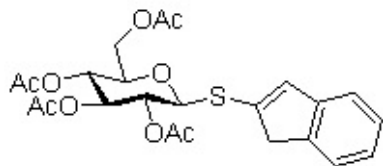

23b

HMBC (400 MHz, CDCl<sub>3</sub>)

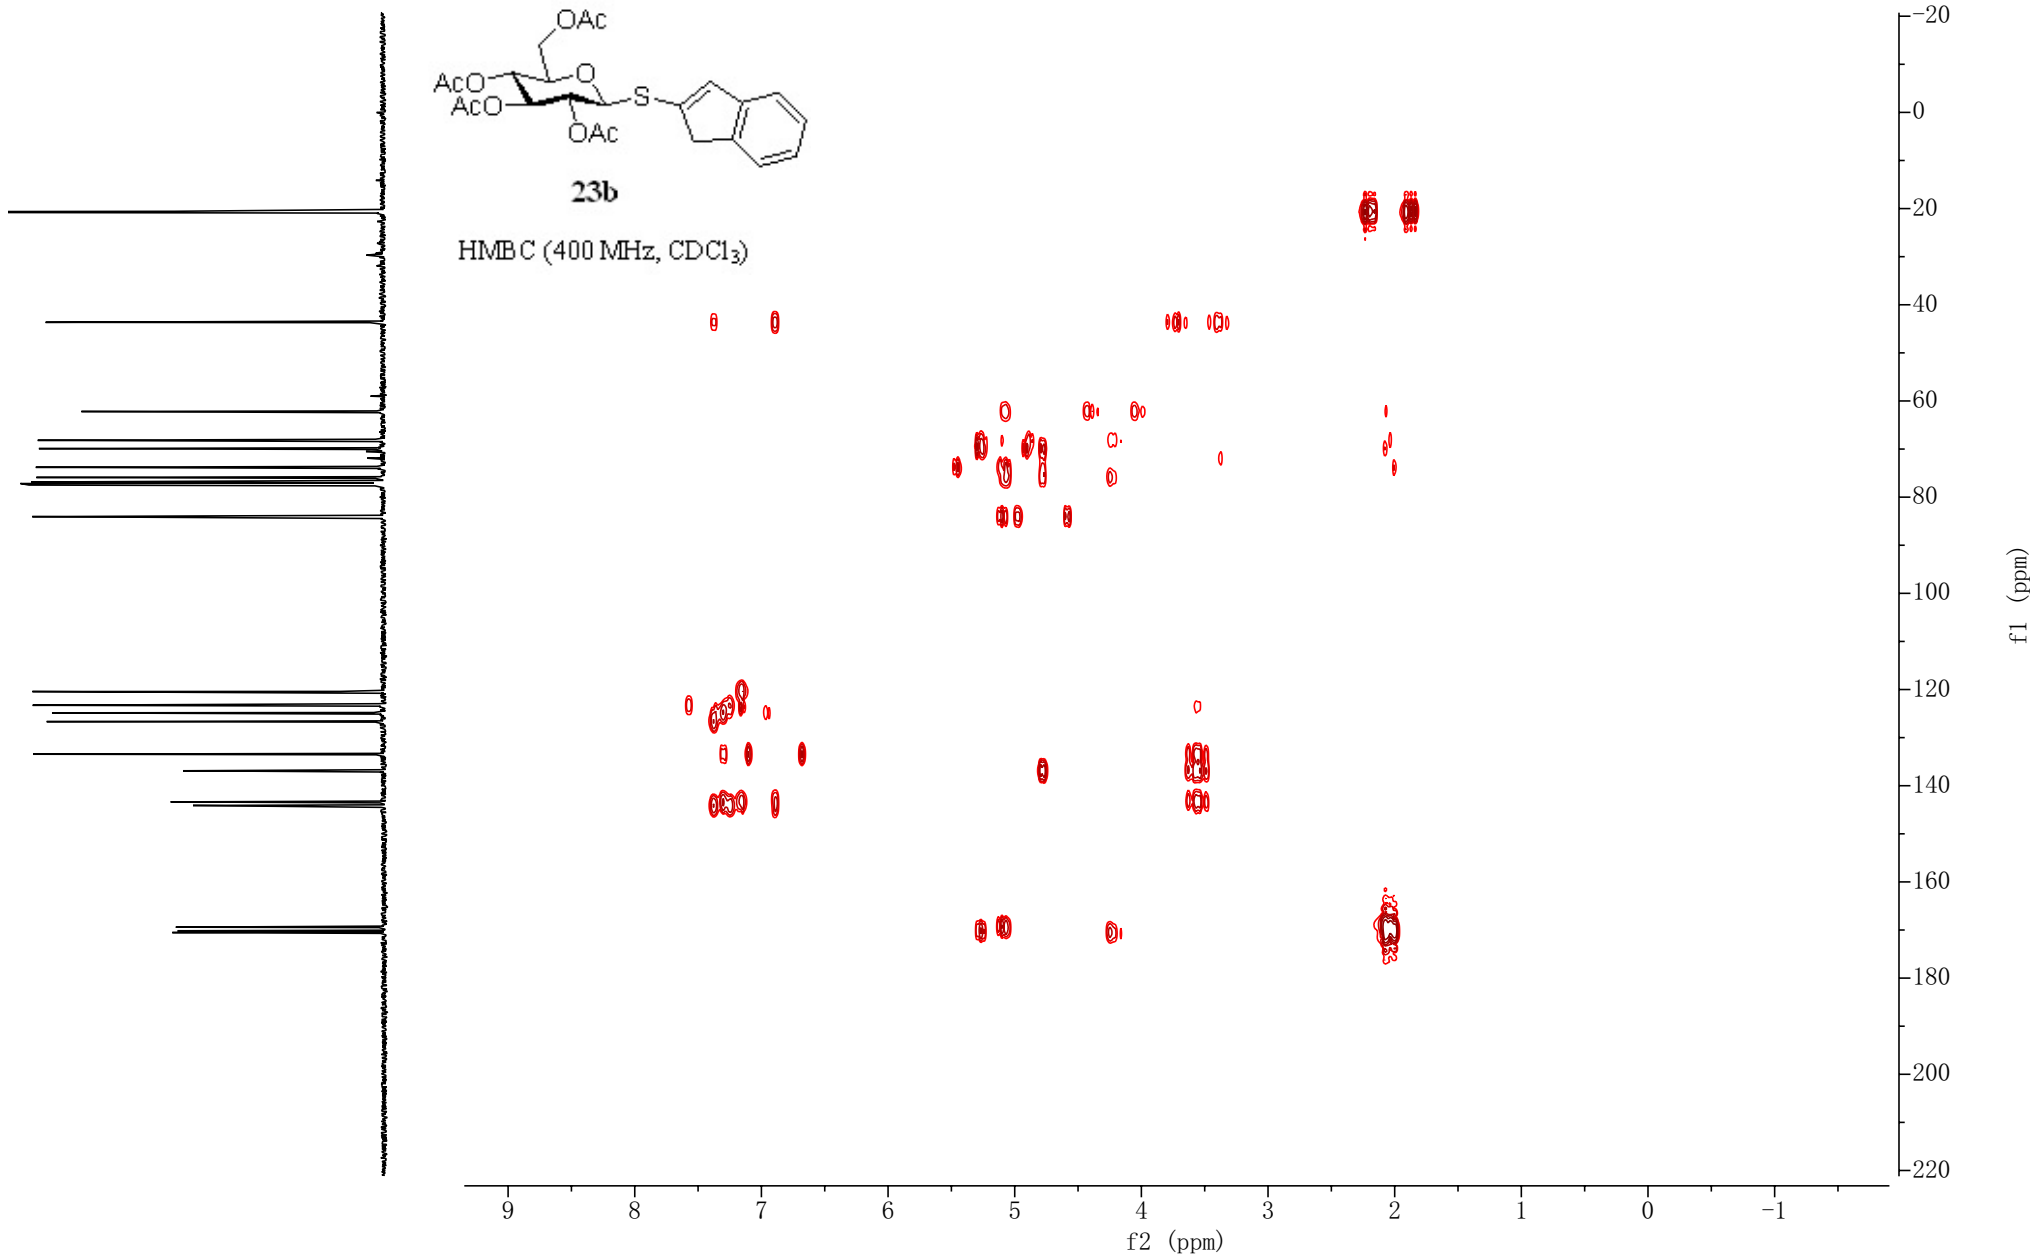

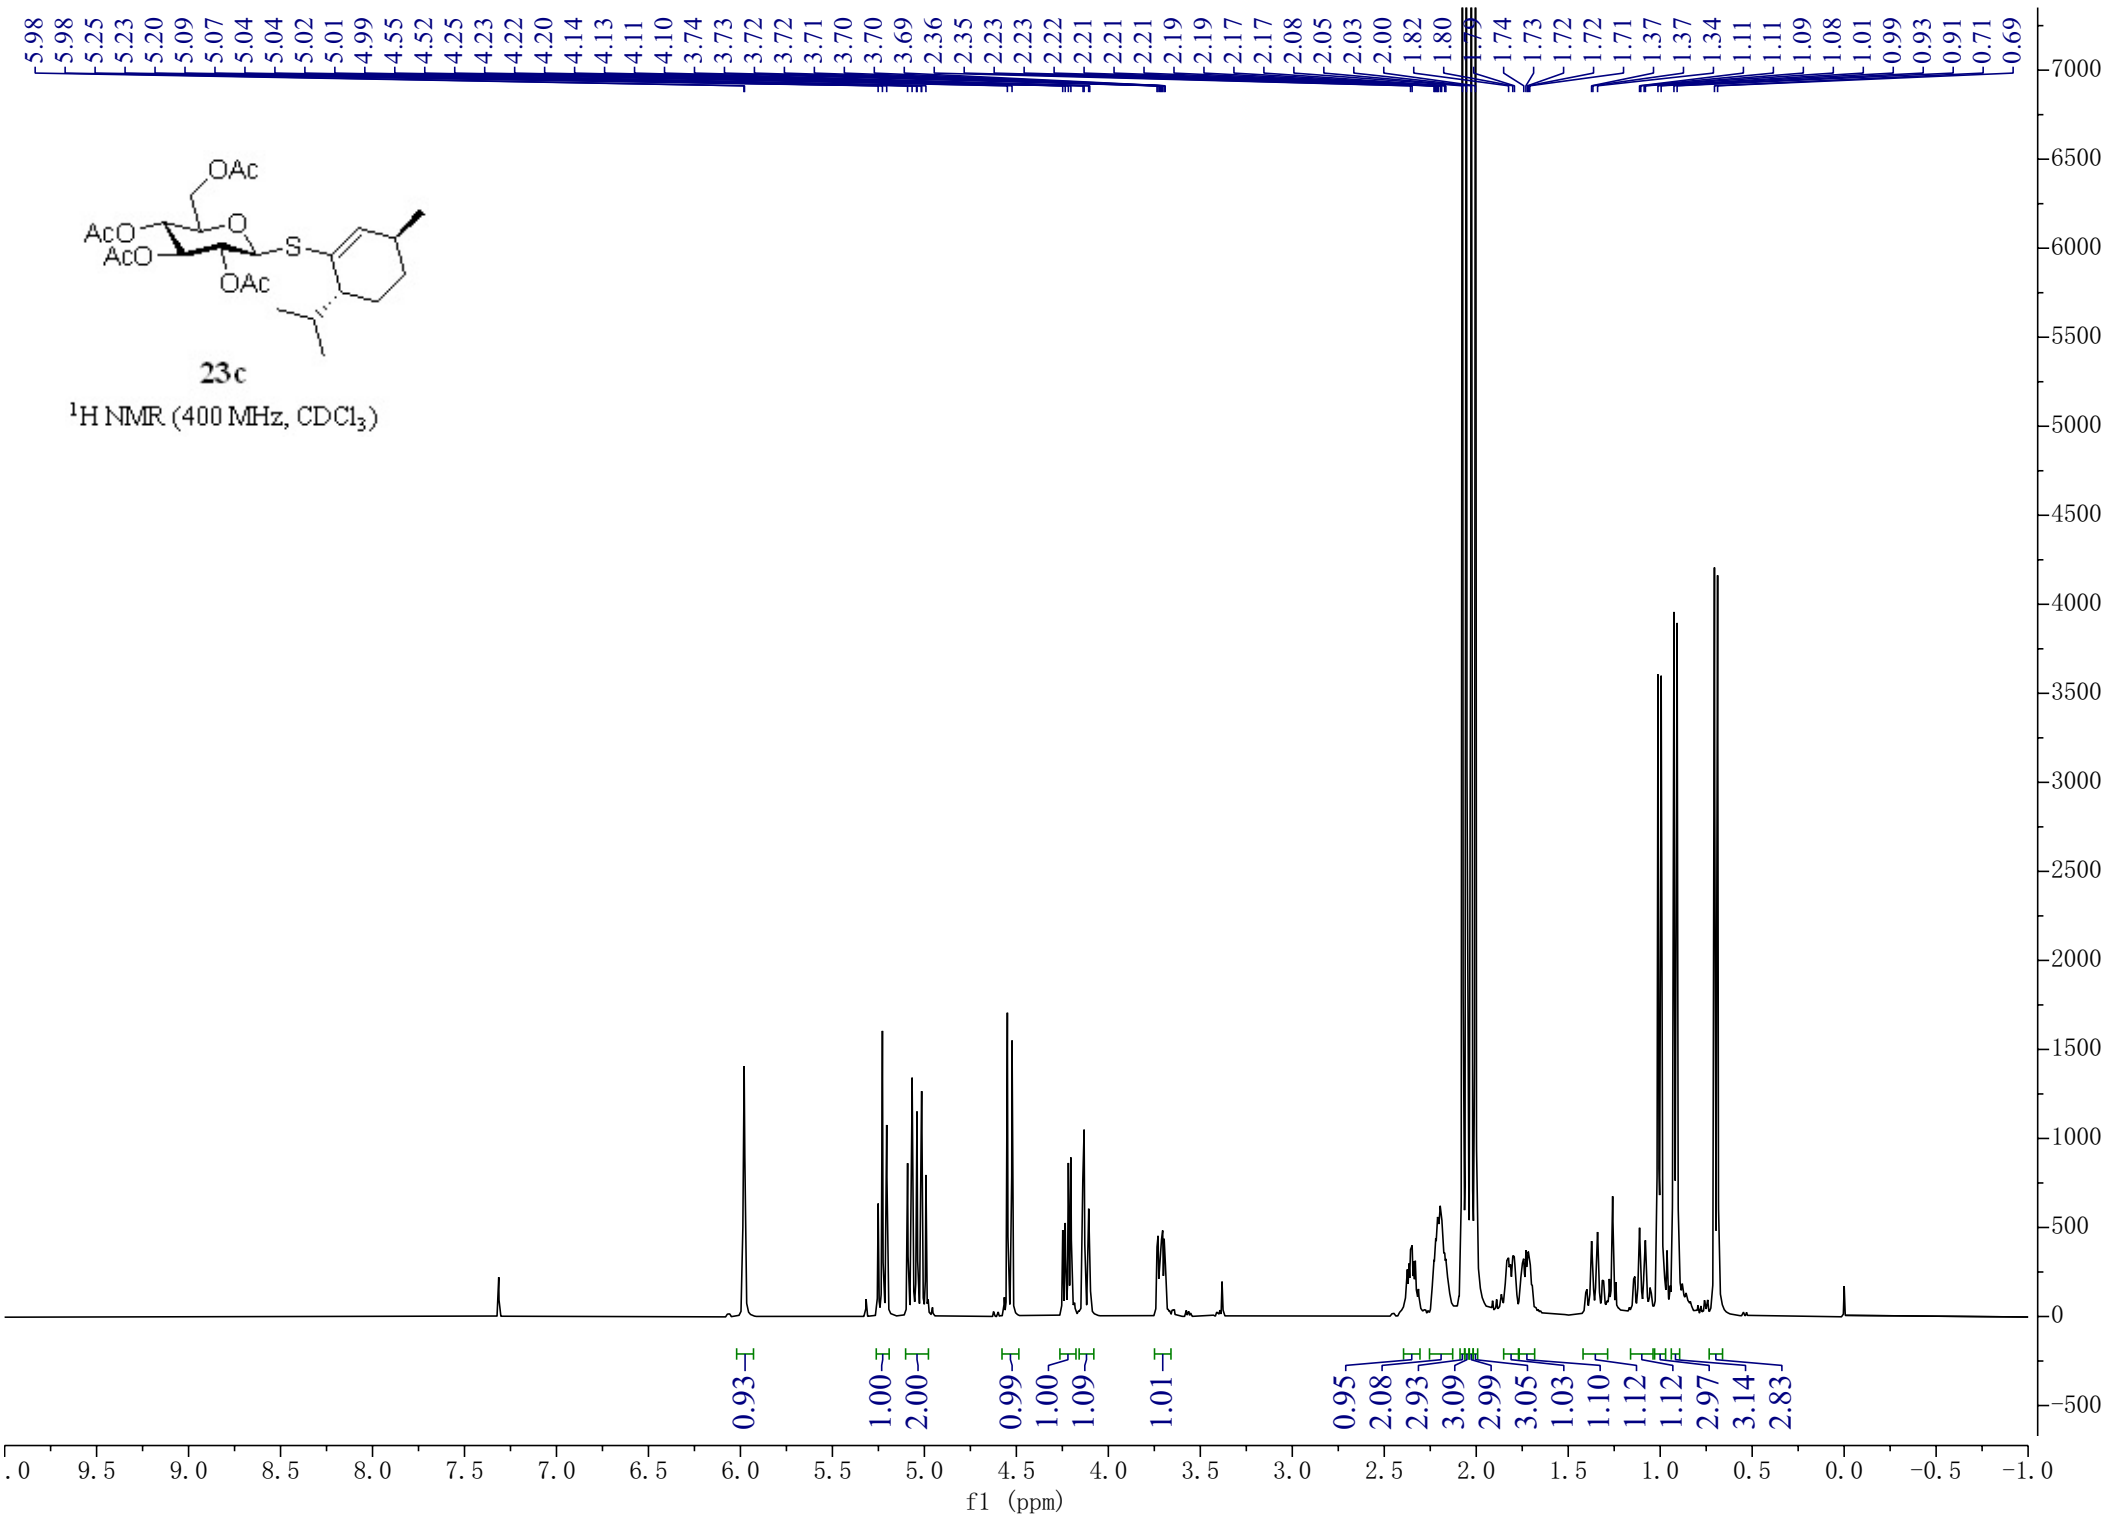

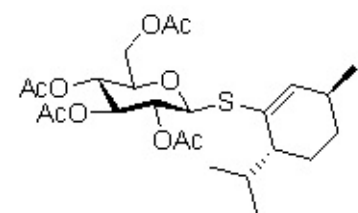

23c

$^{13}\text{C}\{^1\text{H}\}$  NMR (100 MHz,  $\text{CDCl}_3$ )

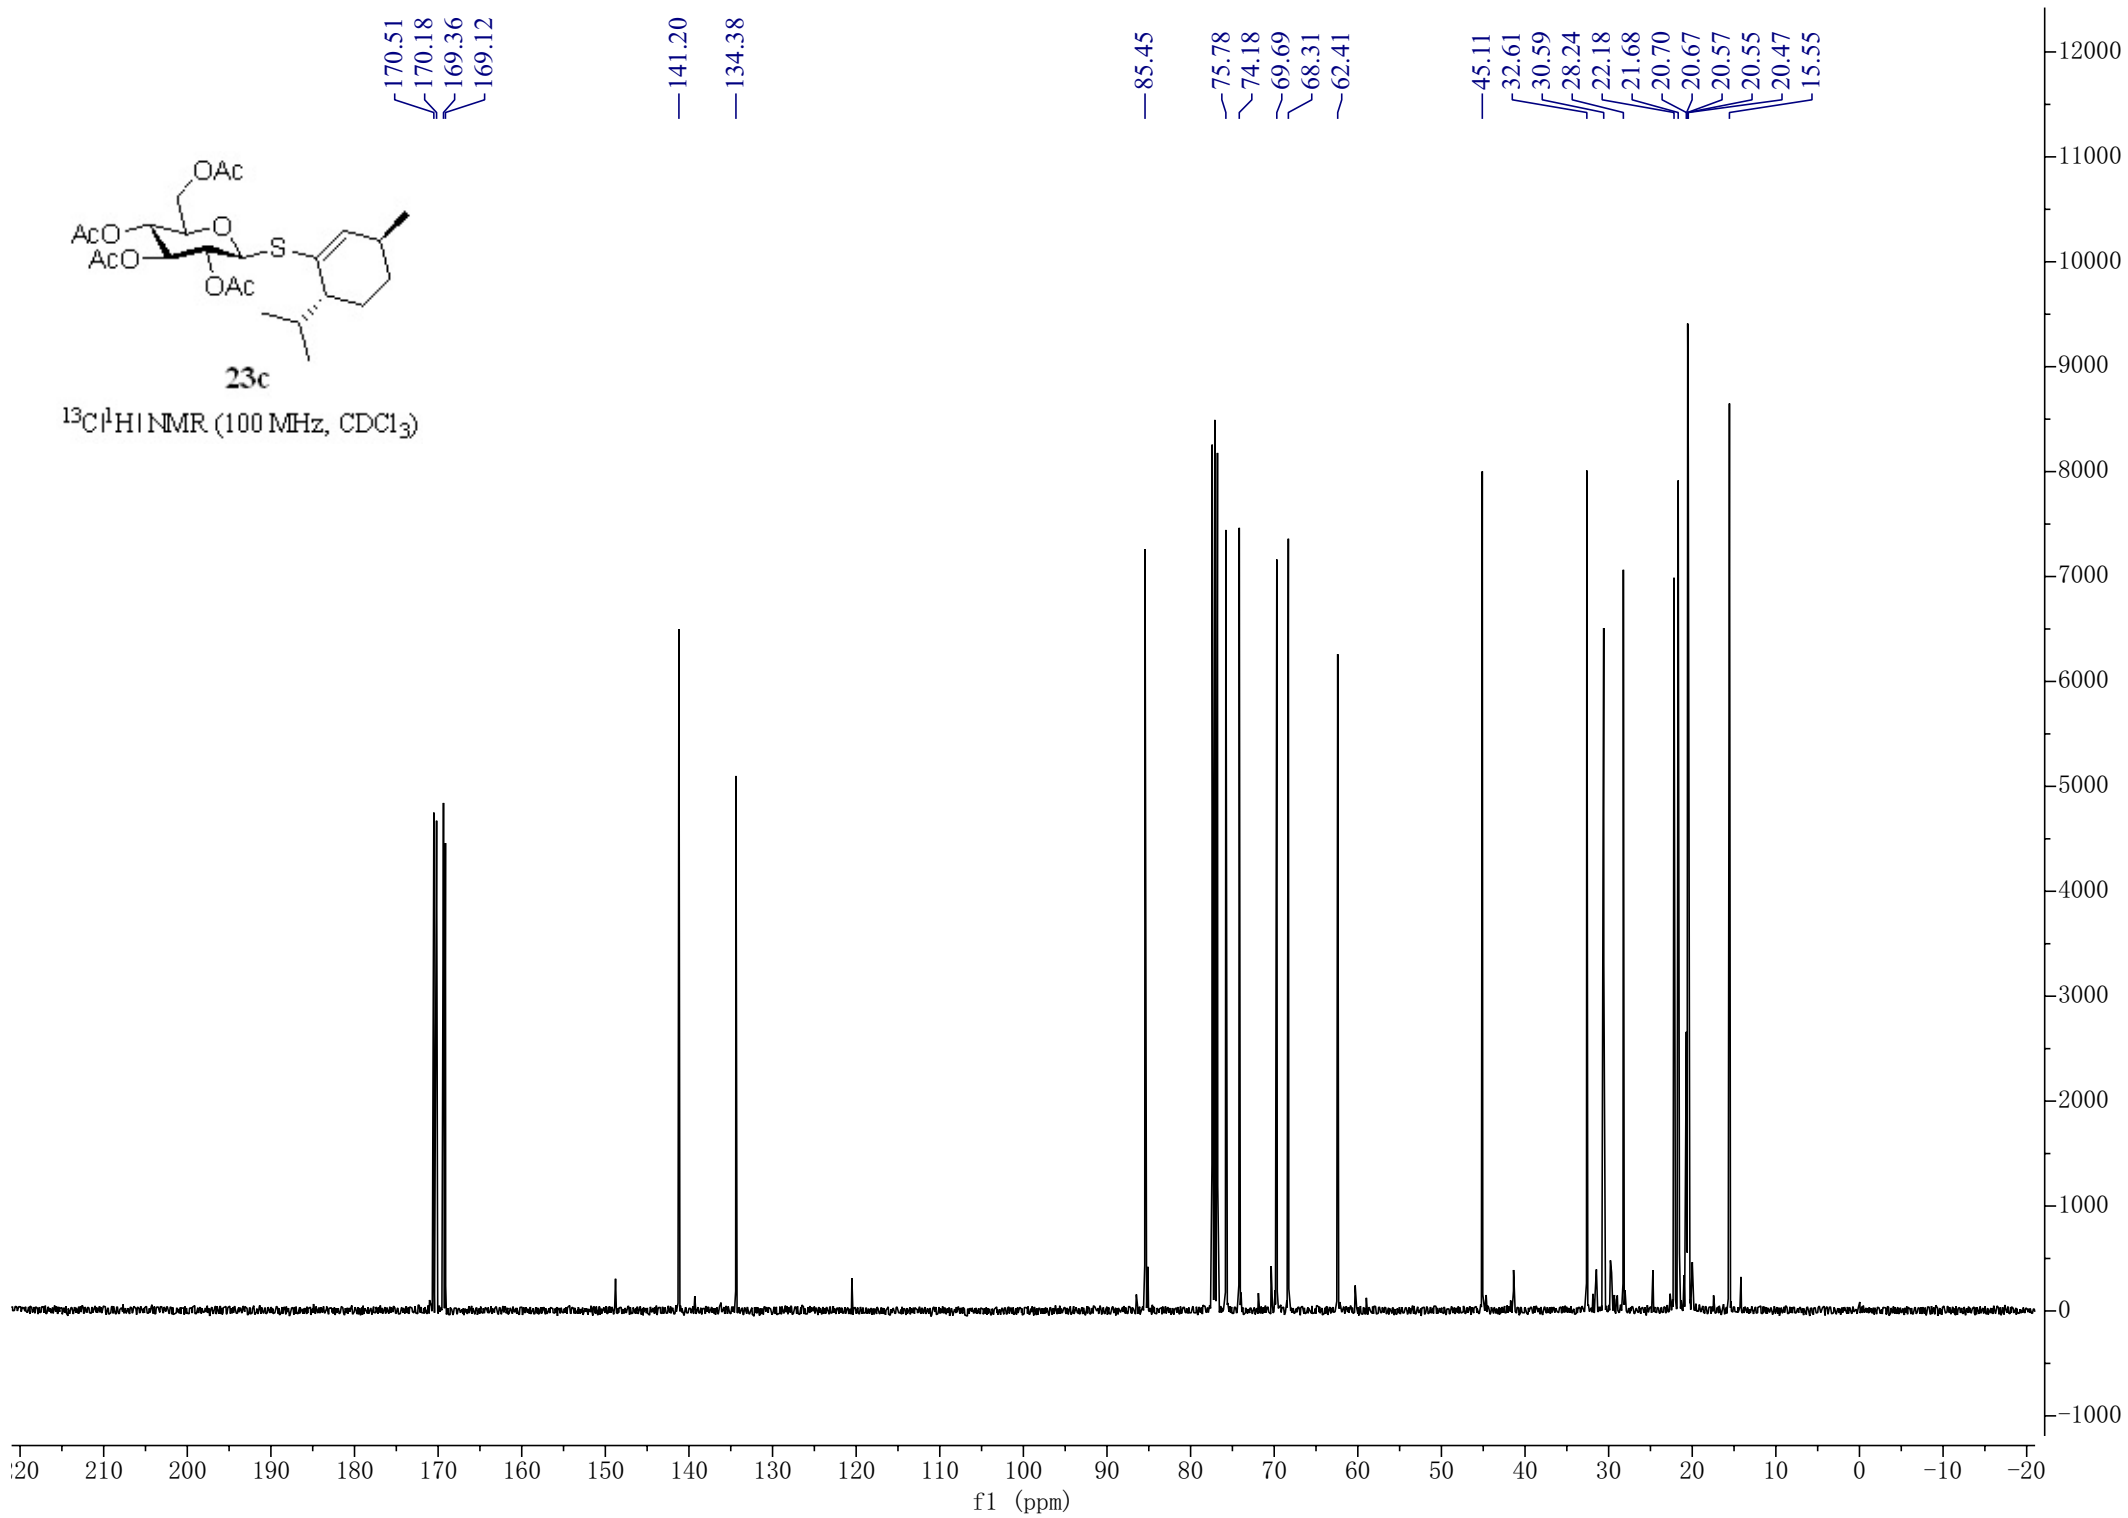

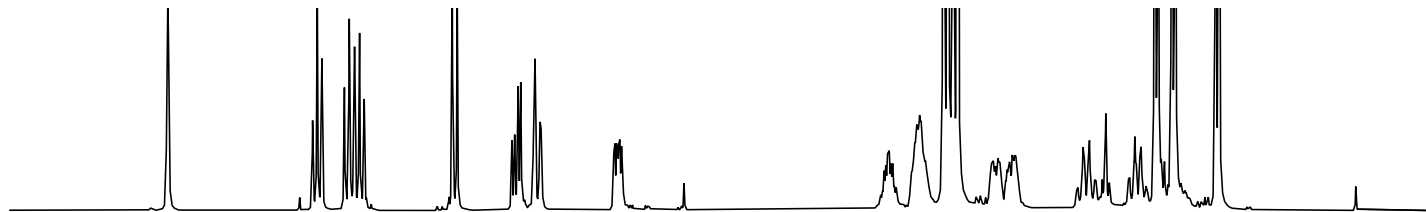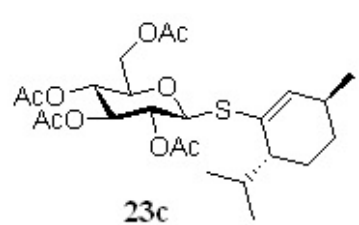

$^1\text{H}$ - $^1\text{H}$  COSY (400 MHz,  $\text{CDCl}_3$ )

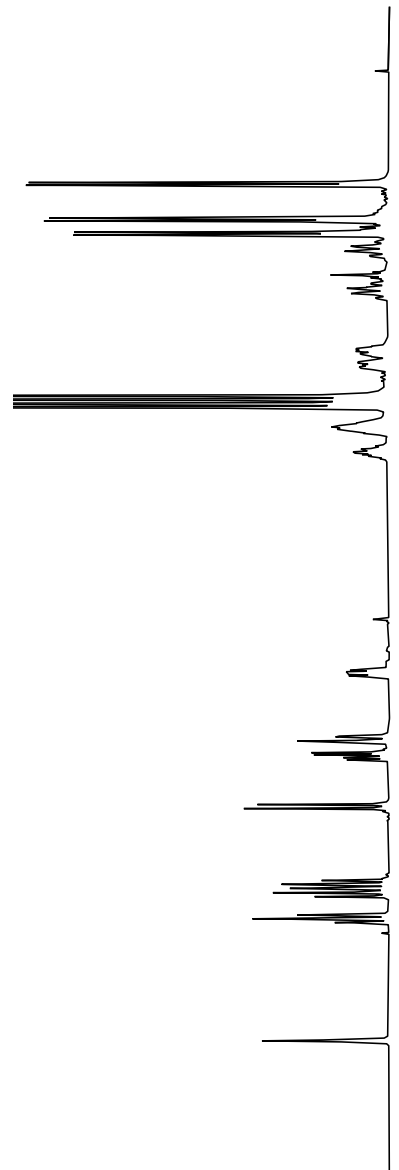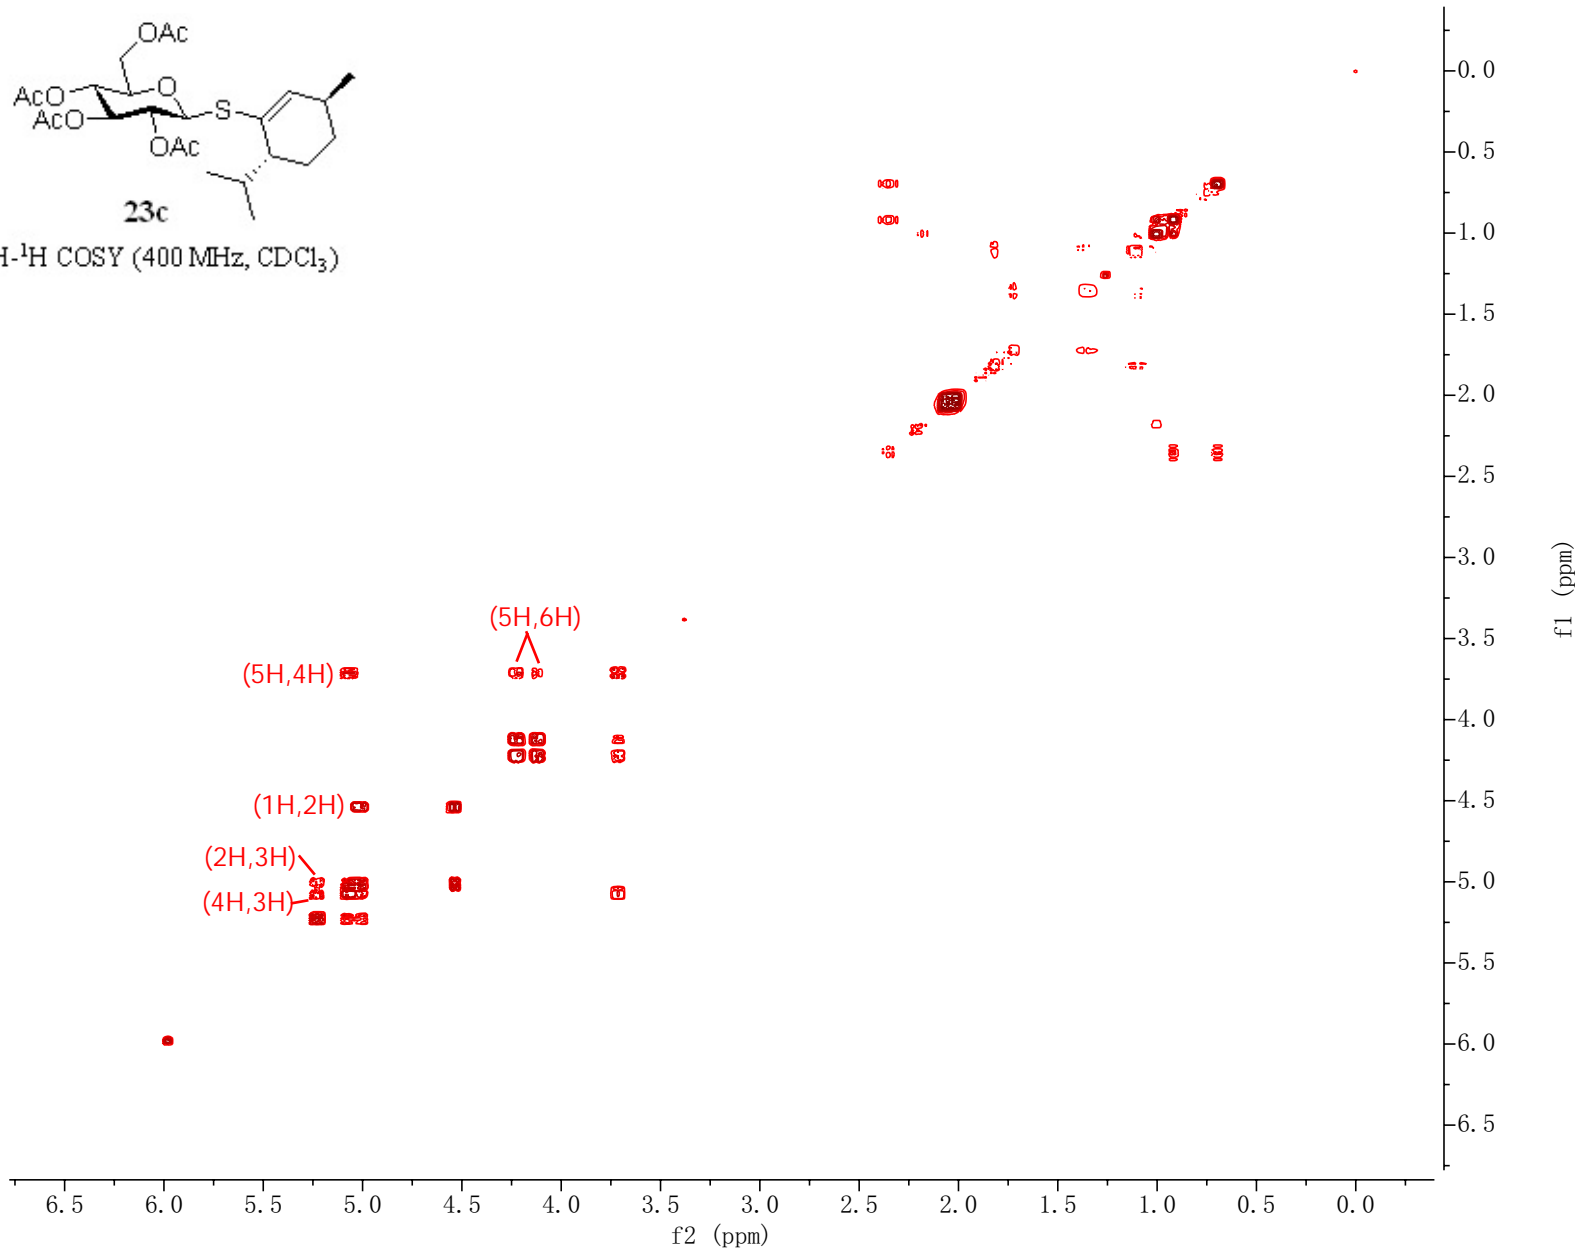

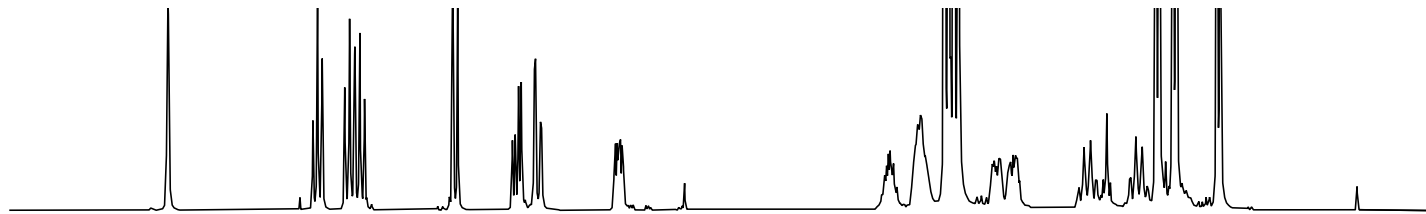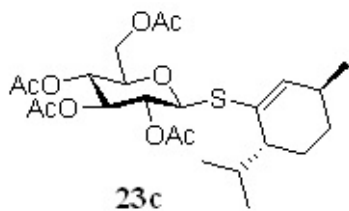

23c

HSQC (400 MHz, CDCl<sub>3</sub>)

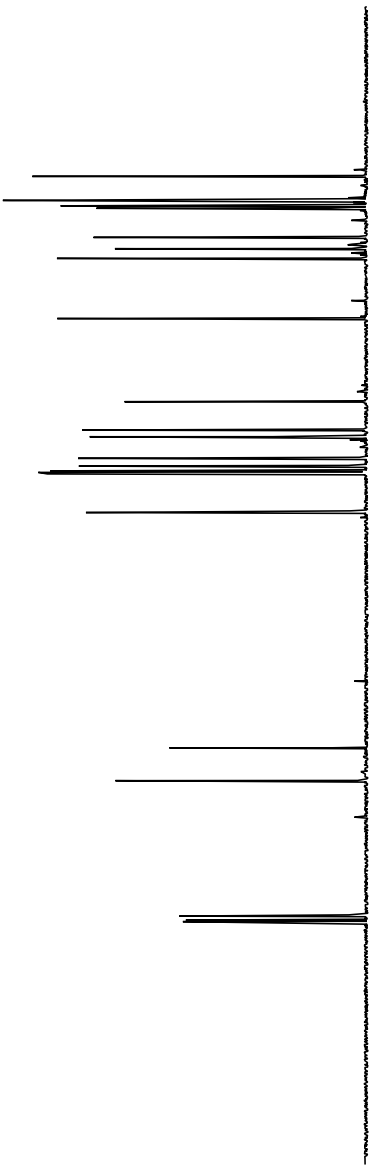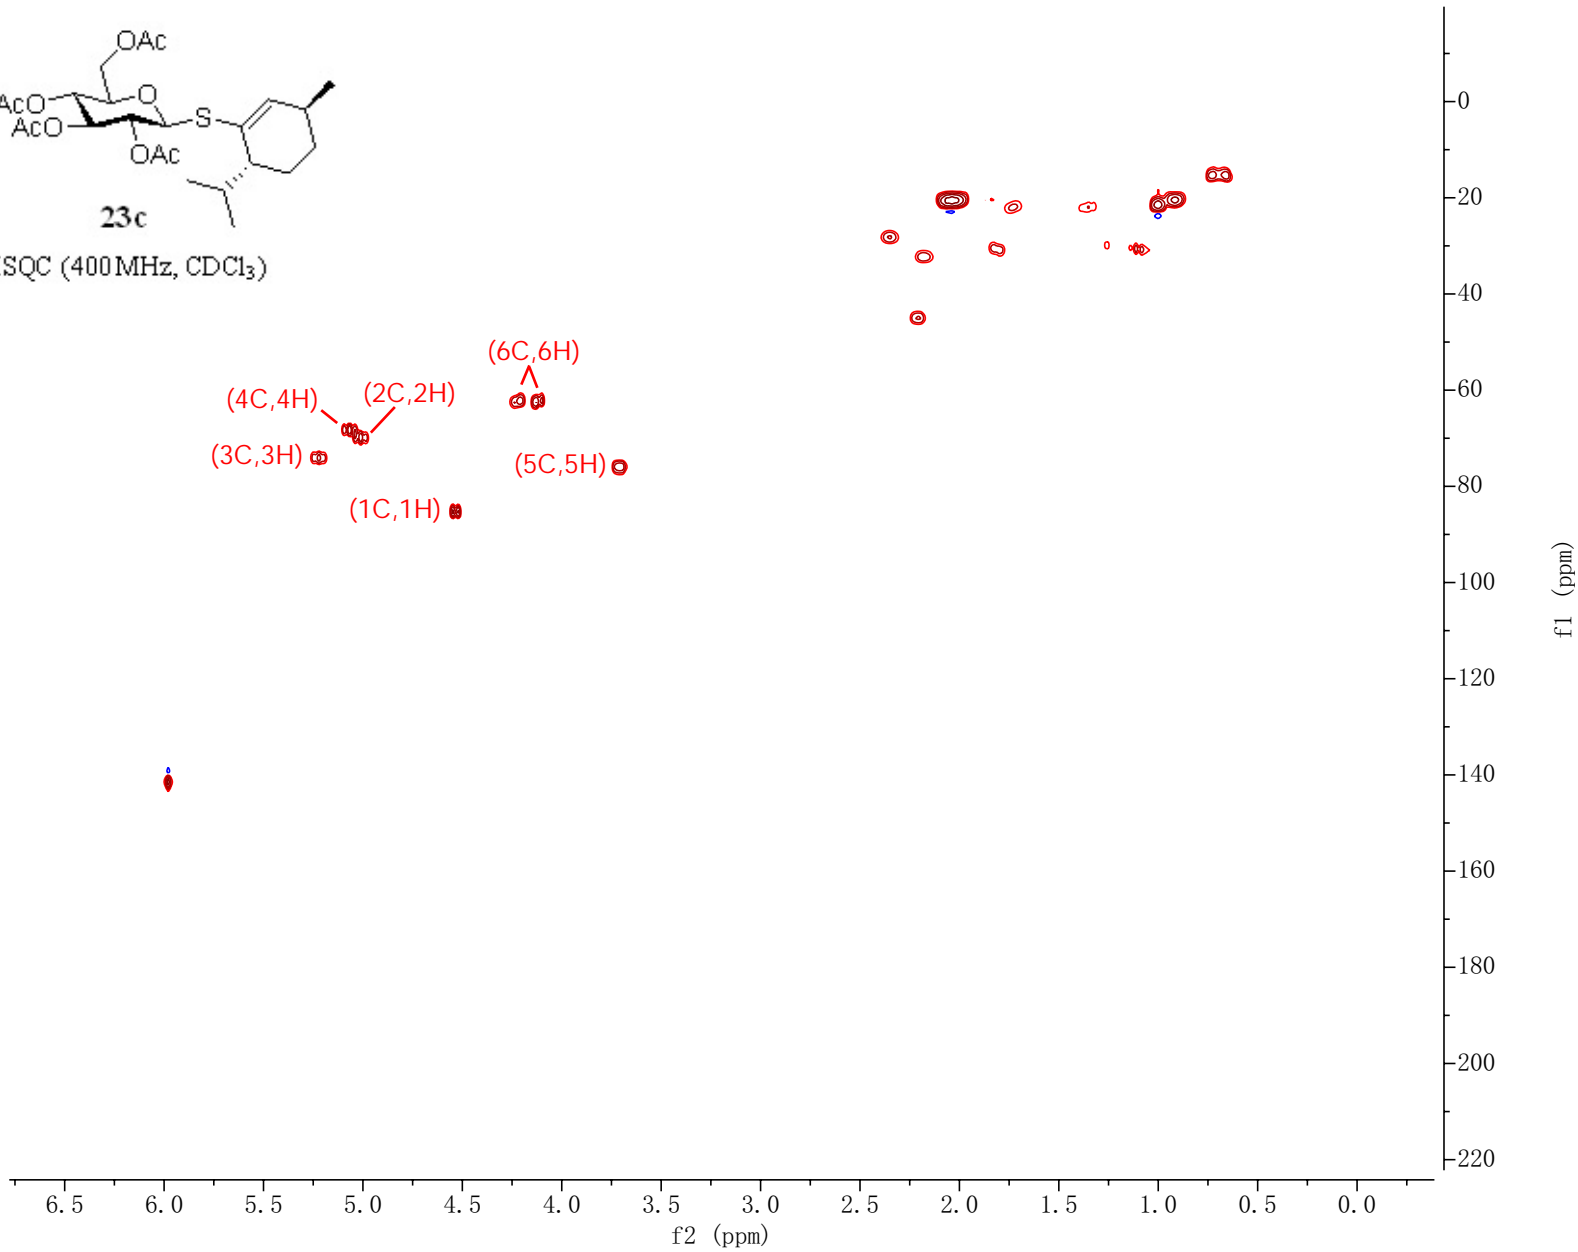

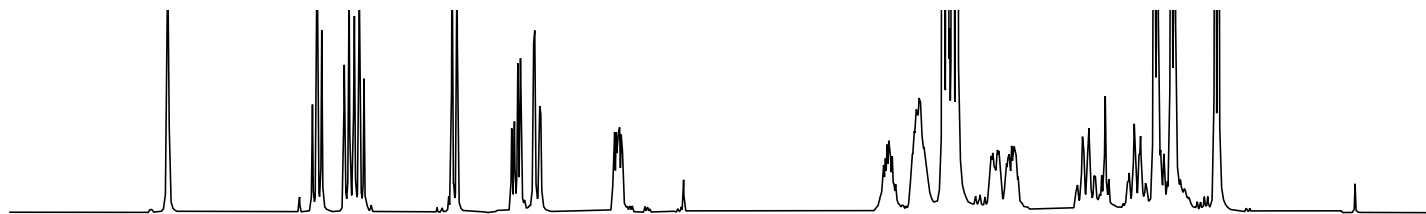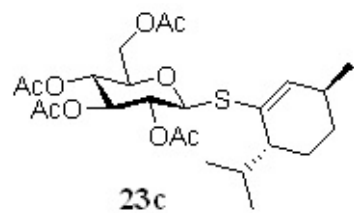

HMBC (400 MHz, CDCl<sub>3</sub>)

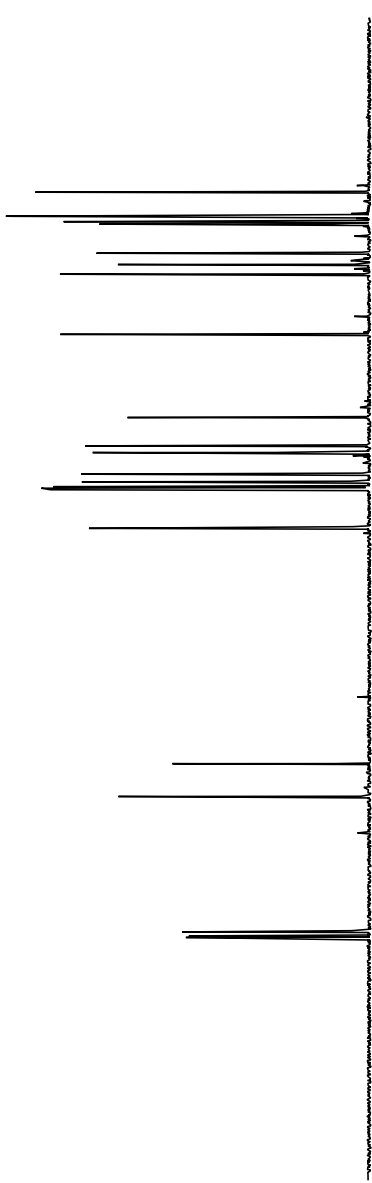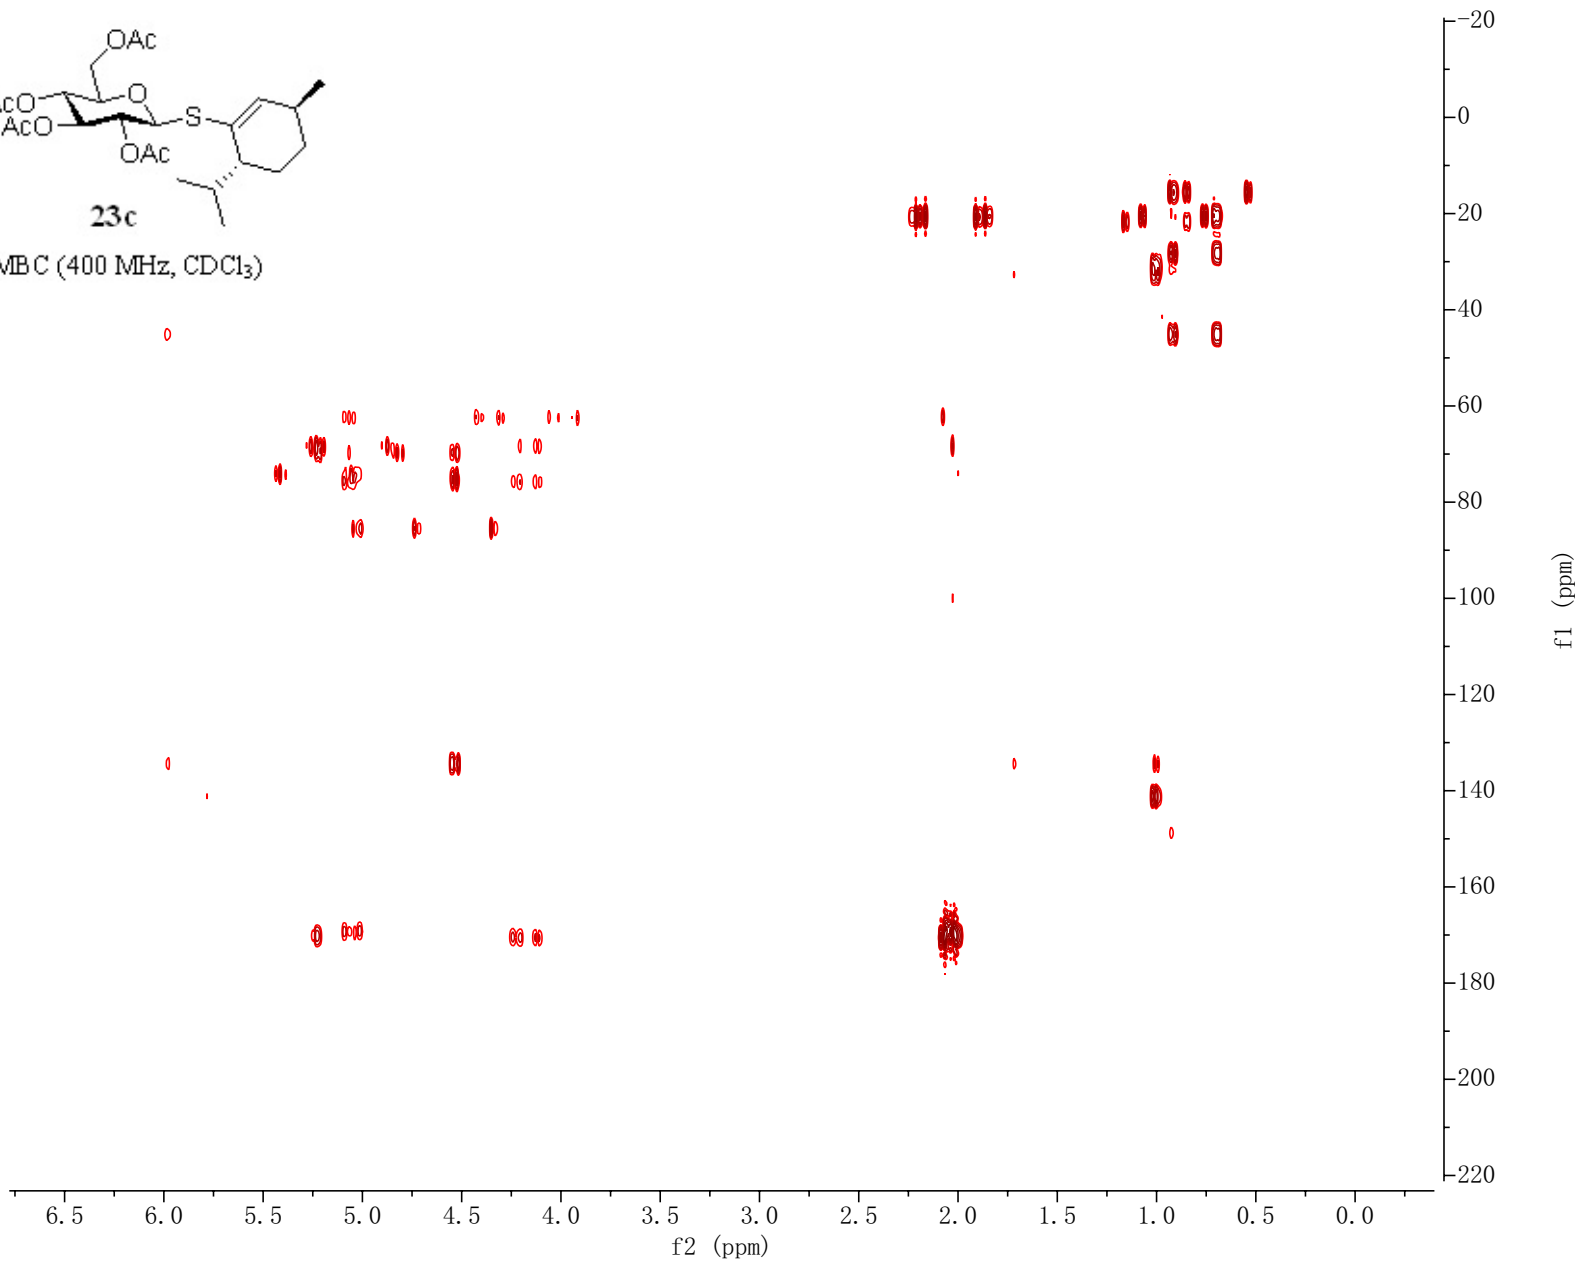

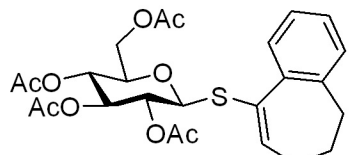

**23d**

<sup>1</sup>H NMR (400 MHz, CDCl<sub>3</sub>)

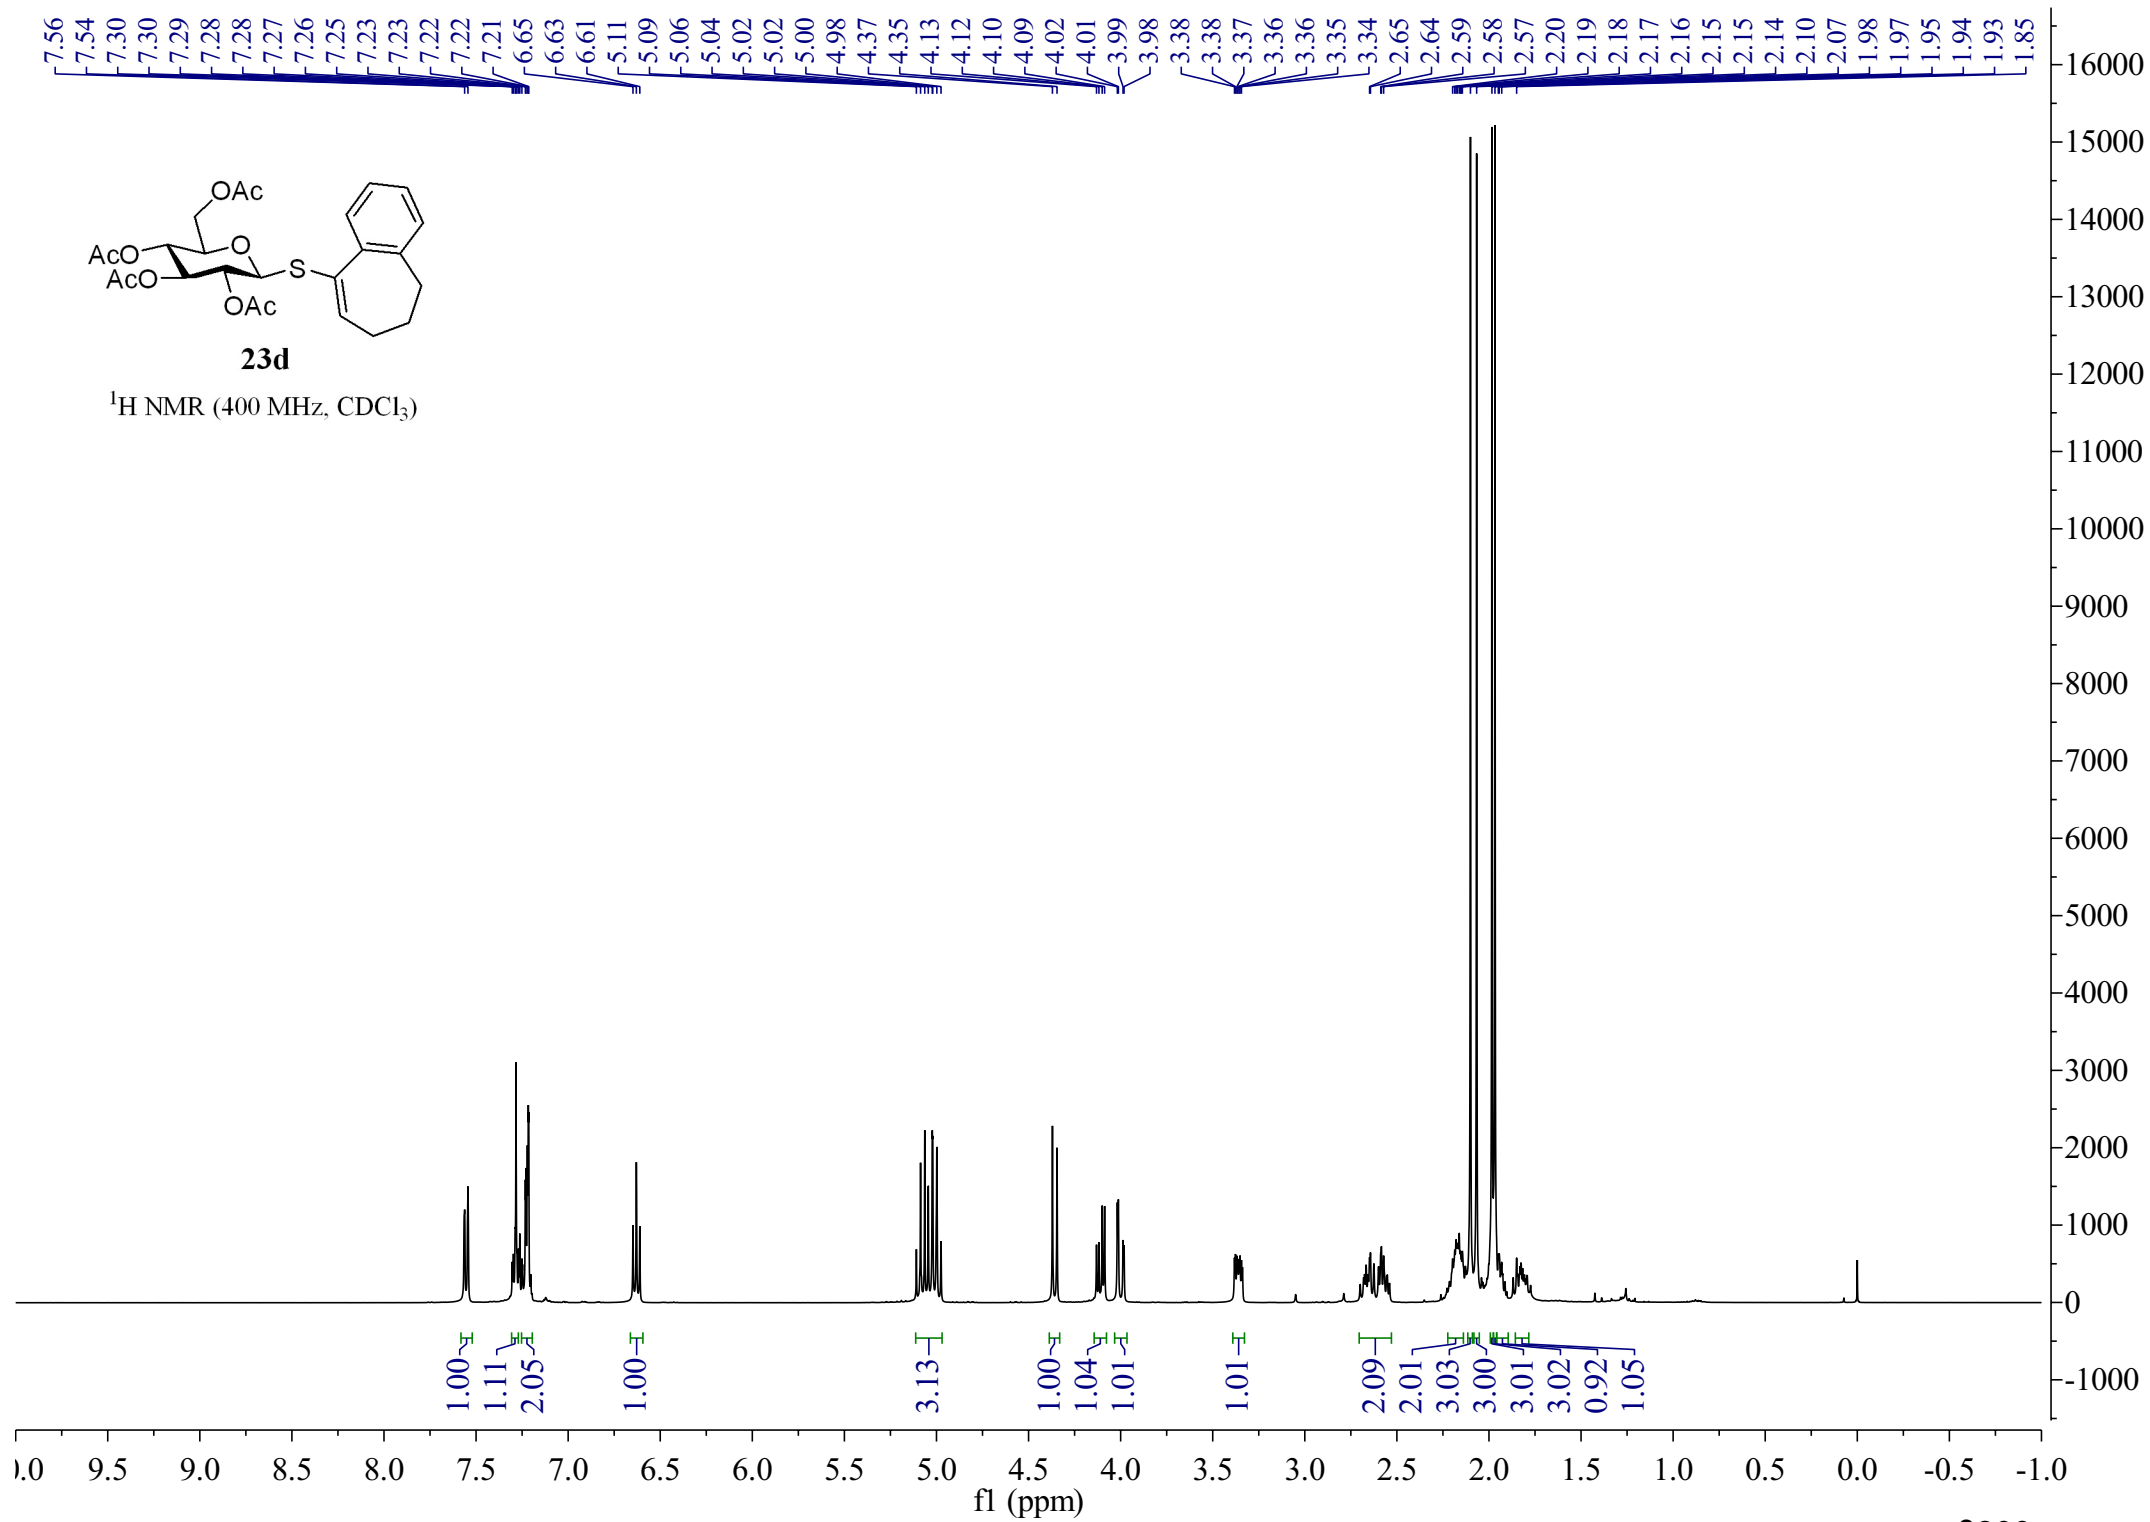



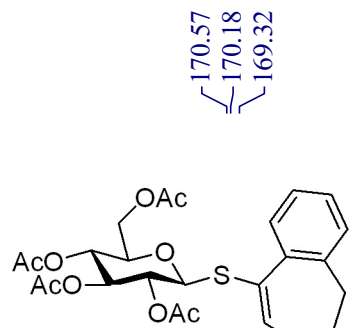

$^{13}\text{C}\{^1\text{H}\}$  NMR (100 MHz,  $\text{CDCl}_3$ )

170.57  
170.18  
169.32

141.97  
137.62  
135.94  
132.13  
128.85  
128.13  
127.89  
126.27

84.11

75.73  
73.91  
70.13  
68.28  
62.22

35.46  
32.10  
25.75  
20.74  
20.72  
20.59  
20.52

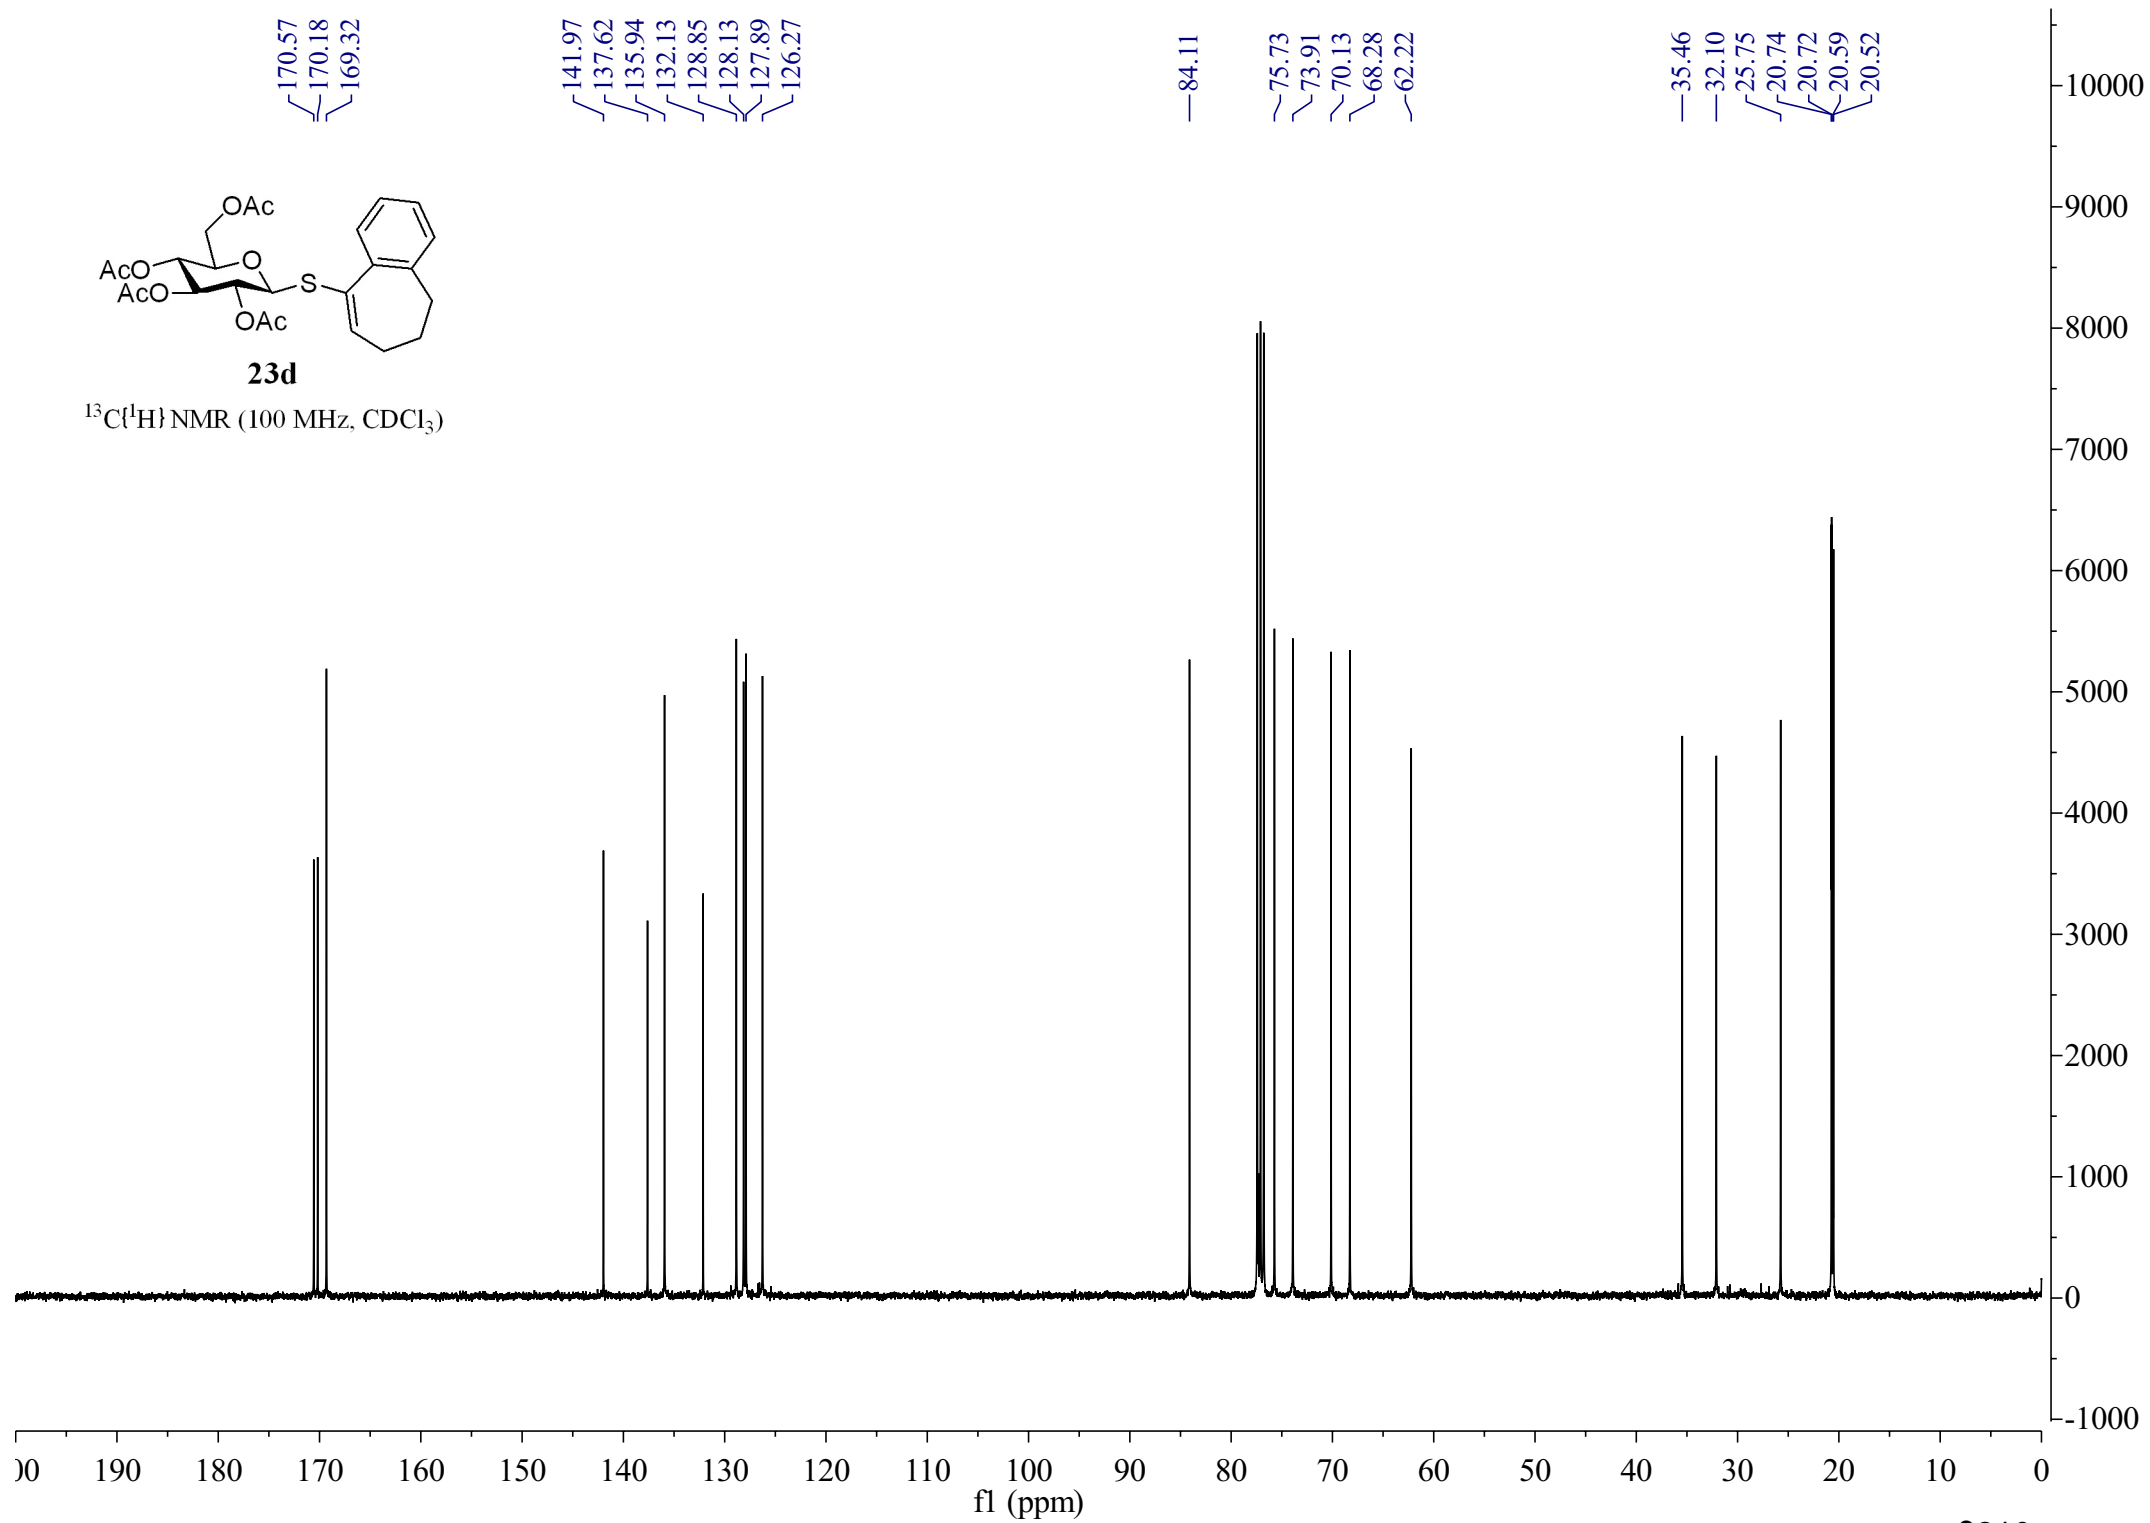

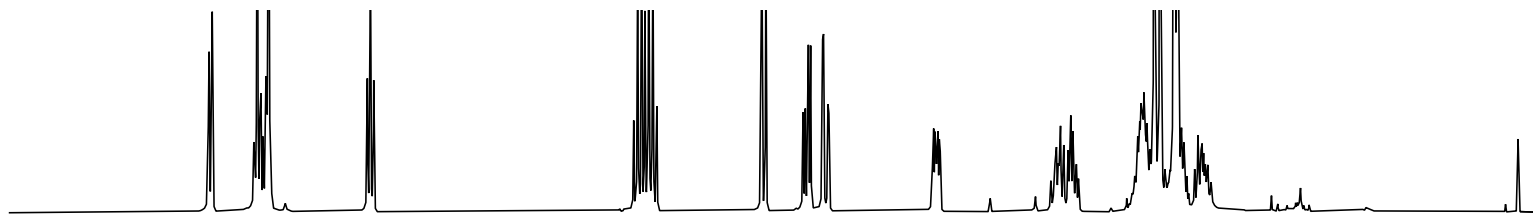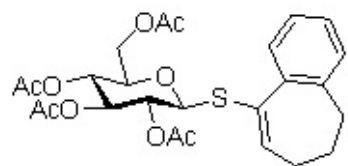

23d

$^1\text{H}$ - $^1\text{H}$  COSY (400 MHz,  $\text{CDCl}_3$ )

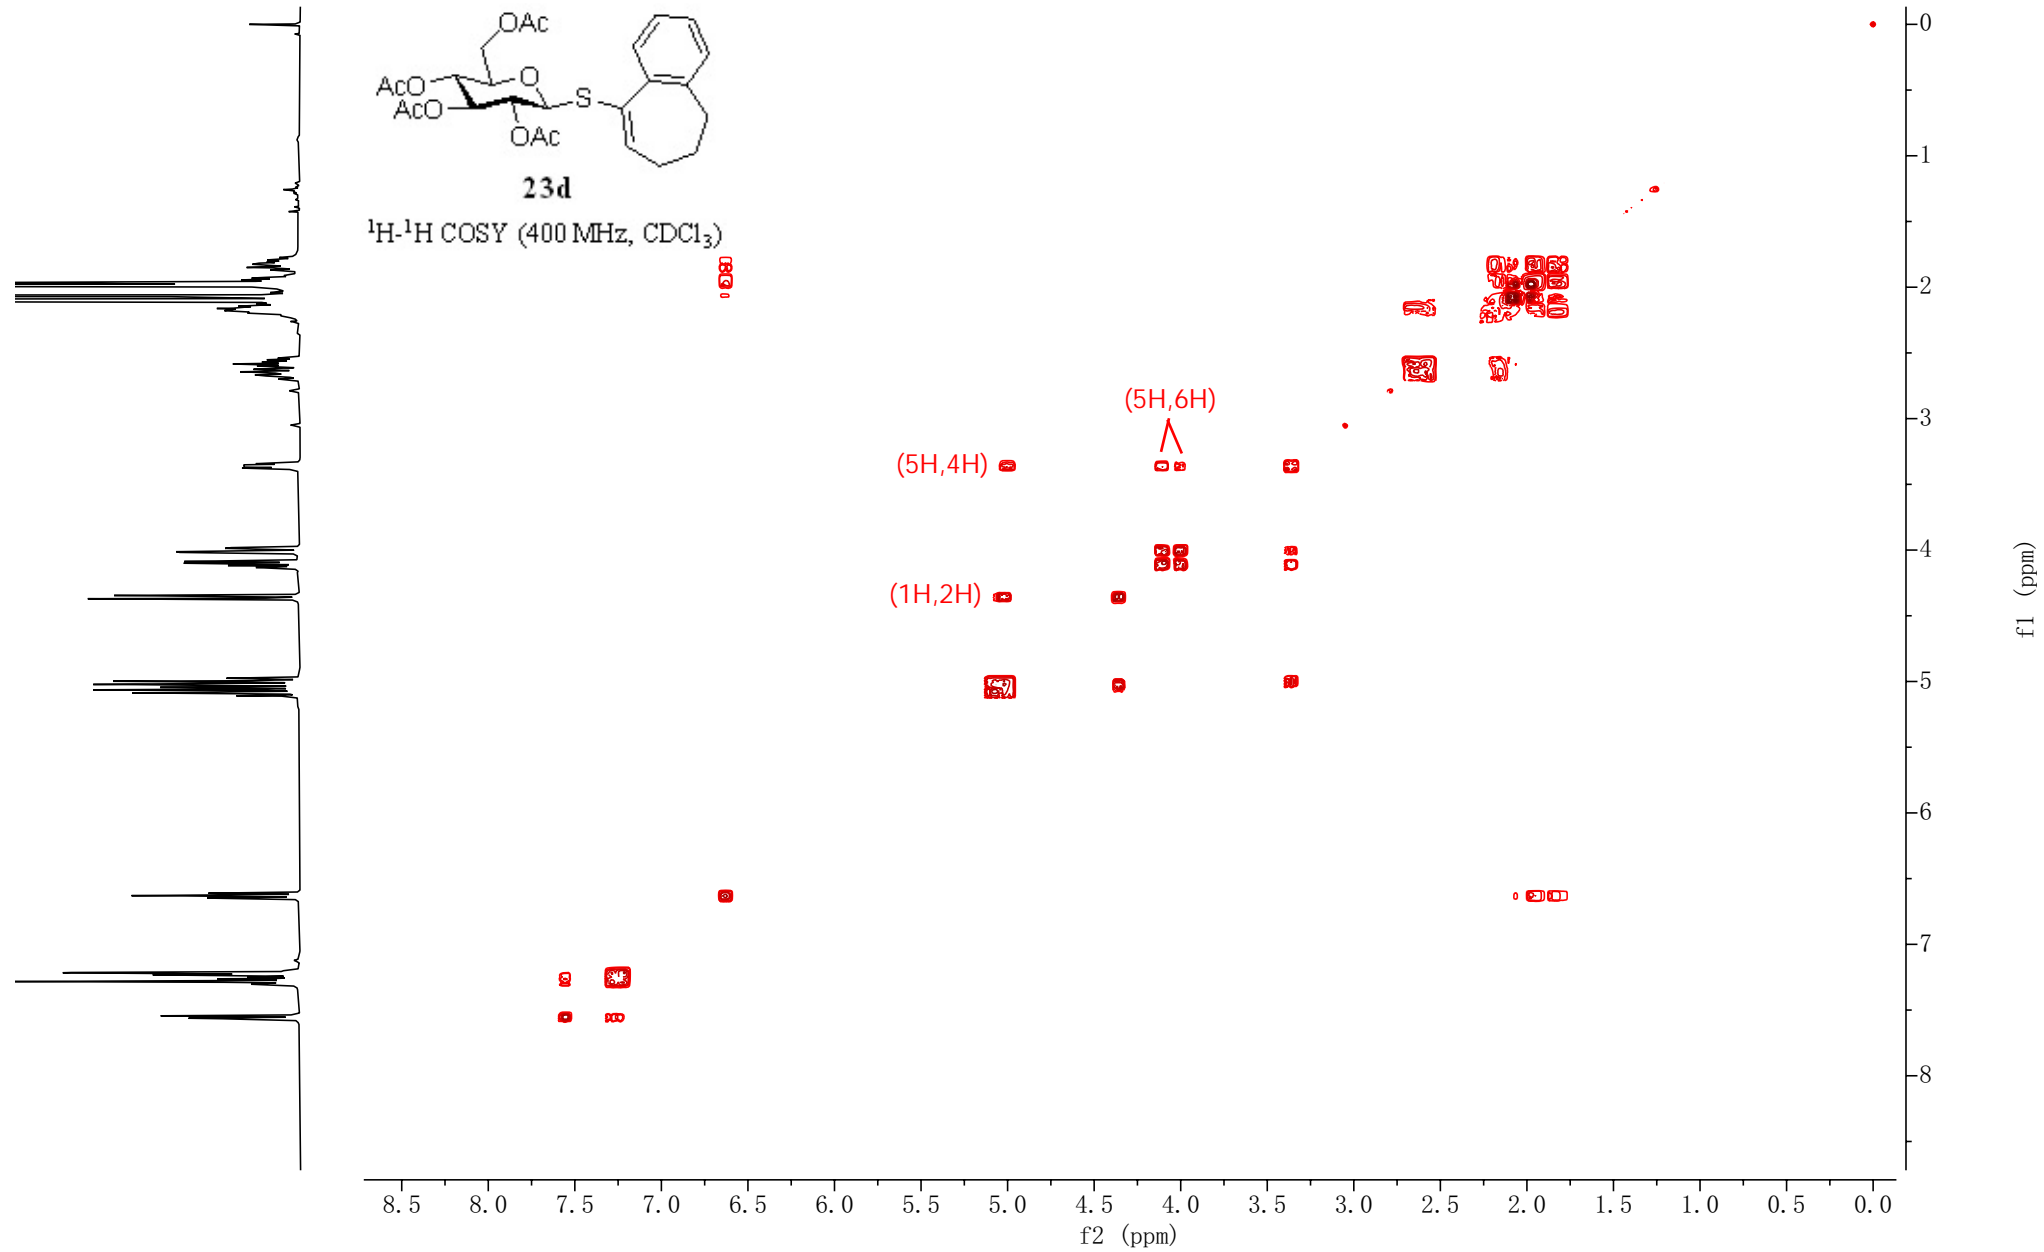

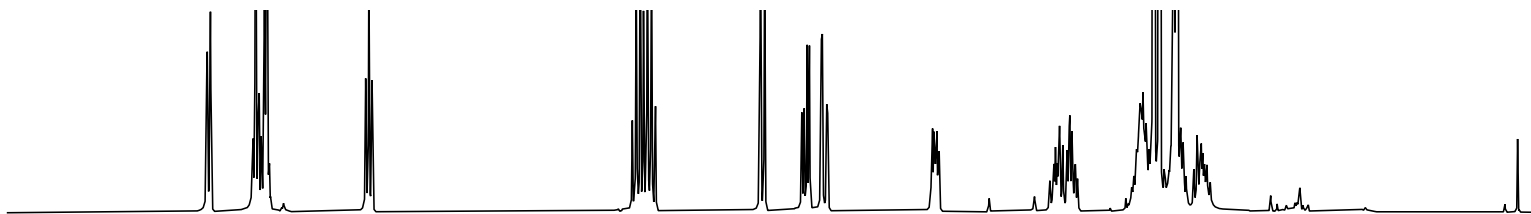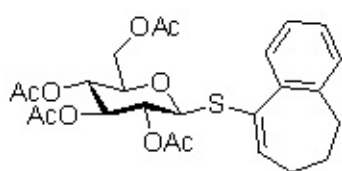

23d

HSQC (400 MHz, CDCl<sub>3</sub>)

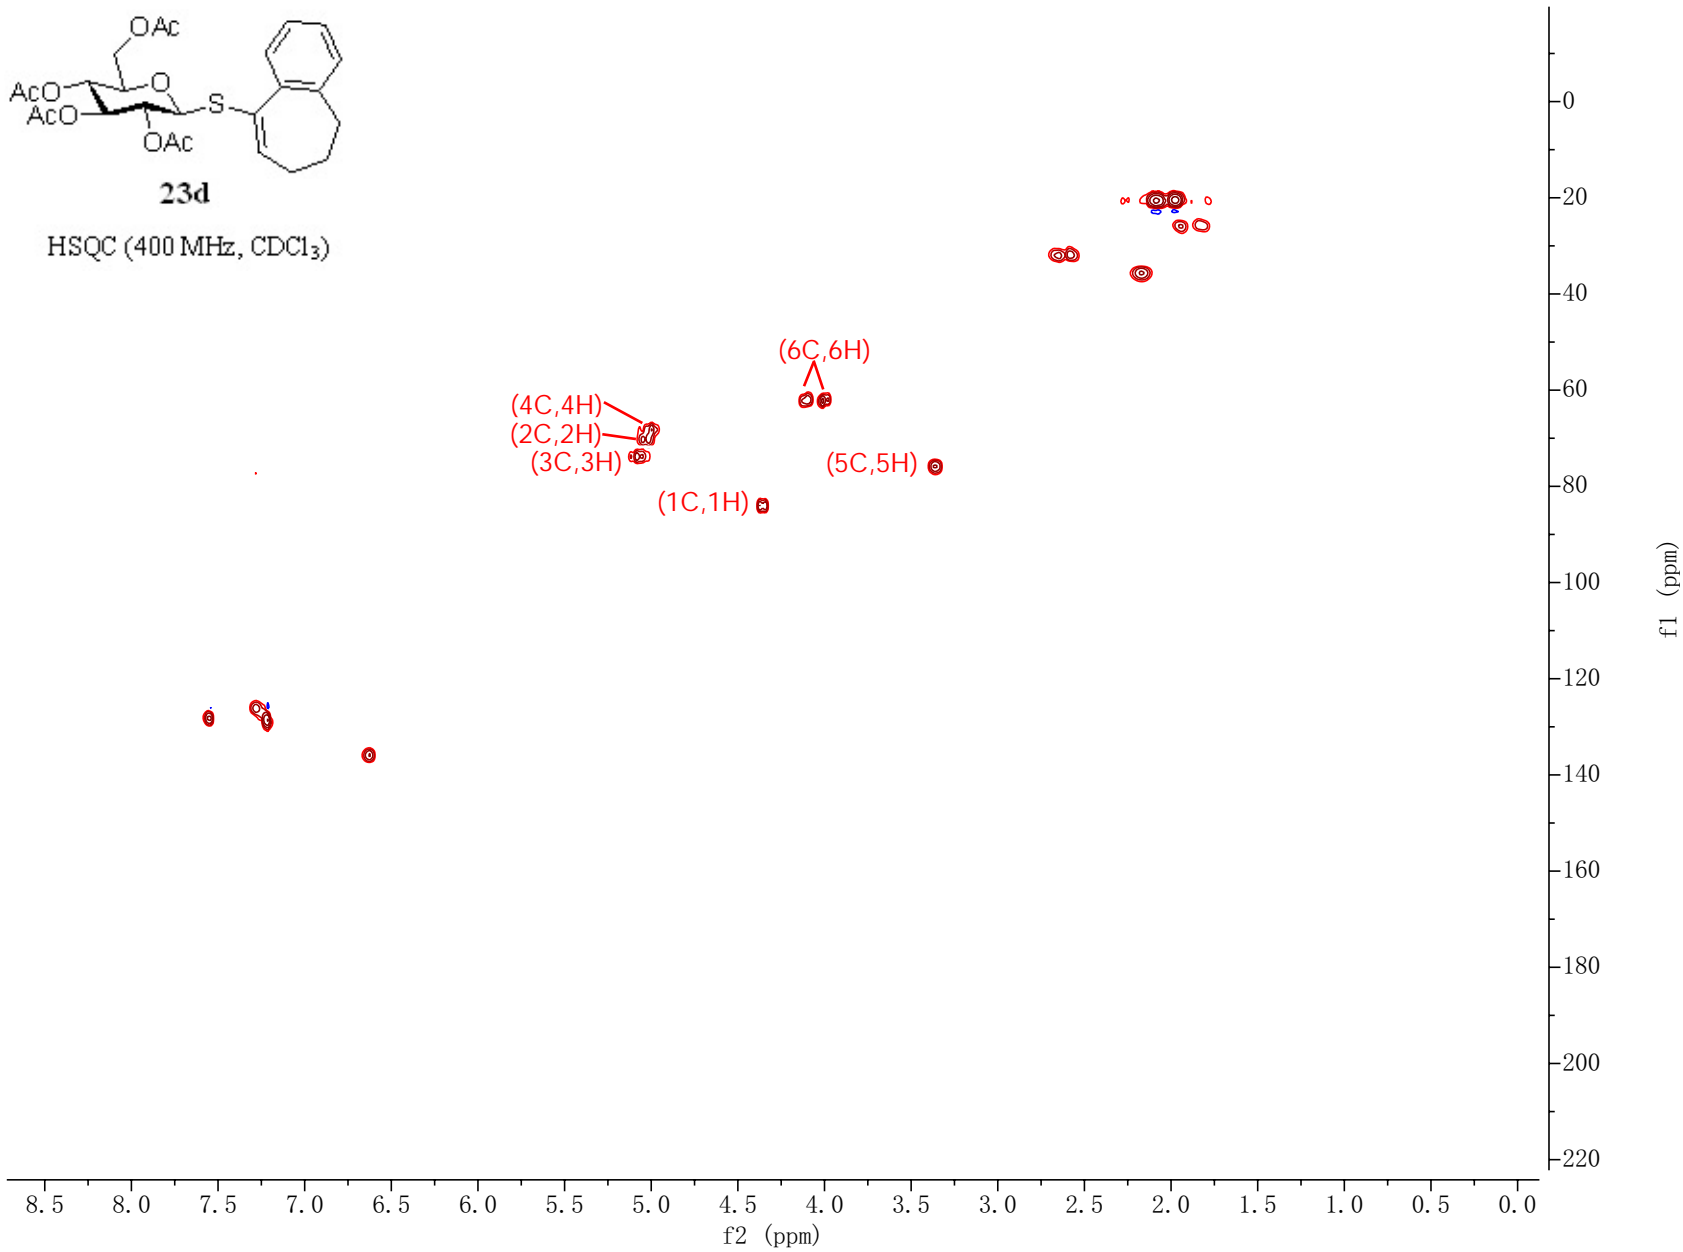

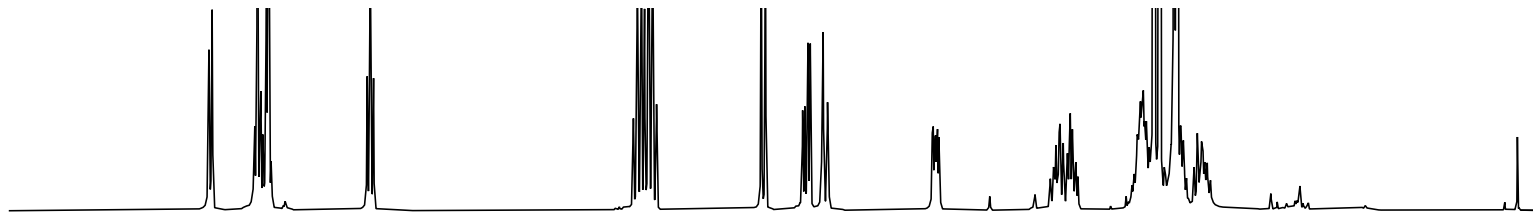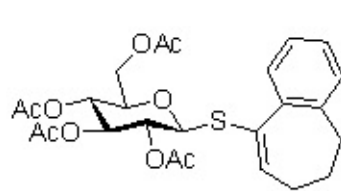

23d

HMBC (400 MHz, CDCl<sub>3</sub>)

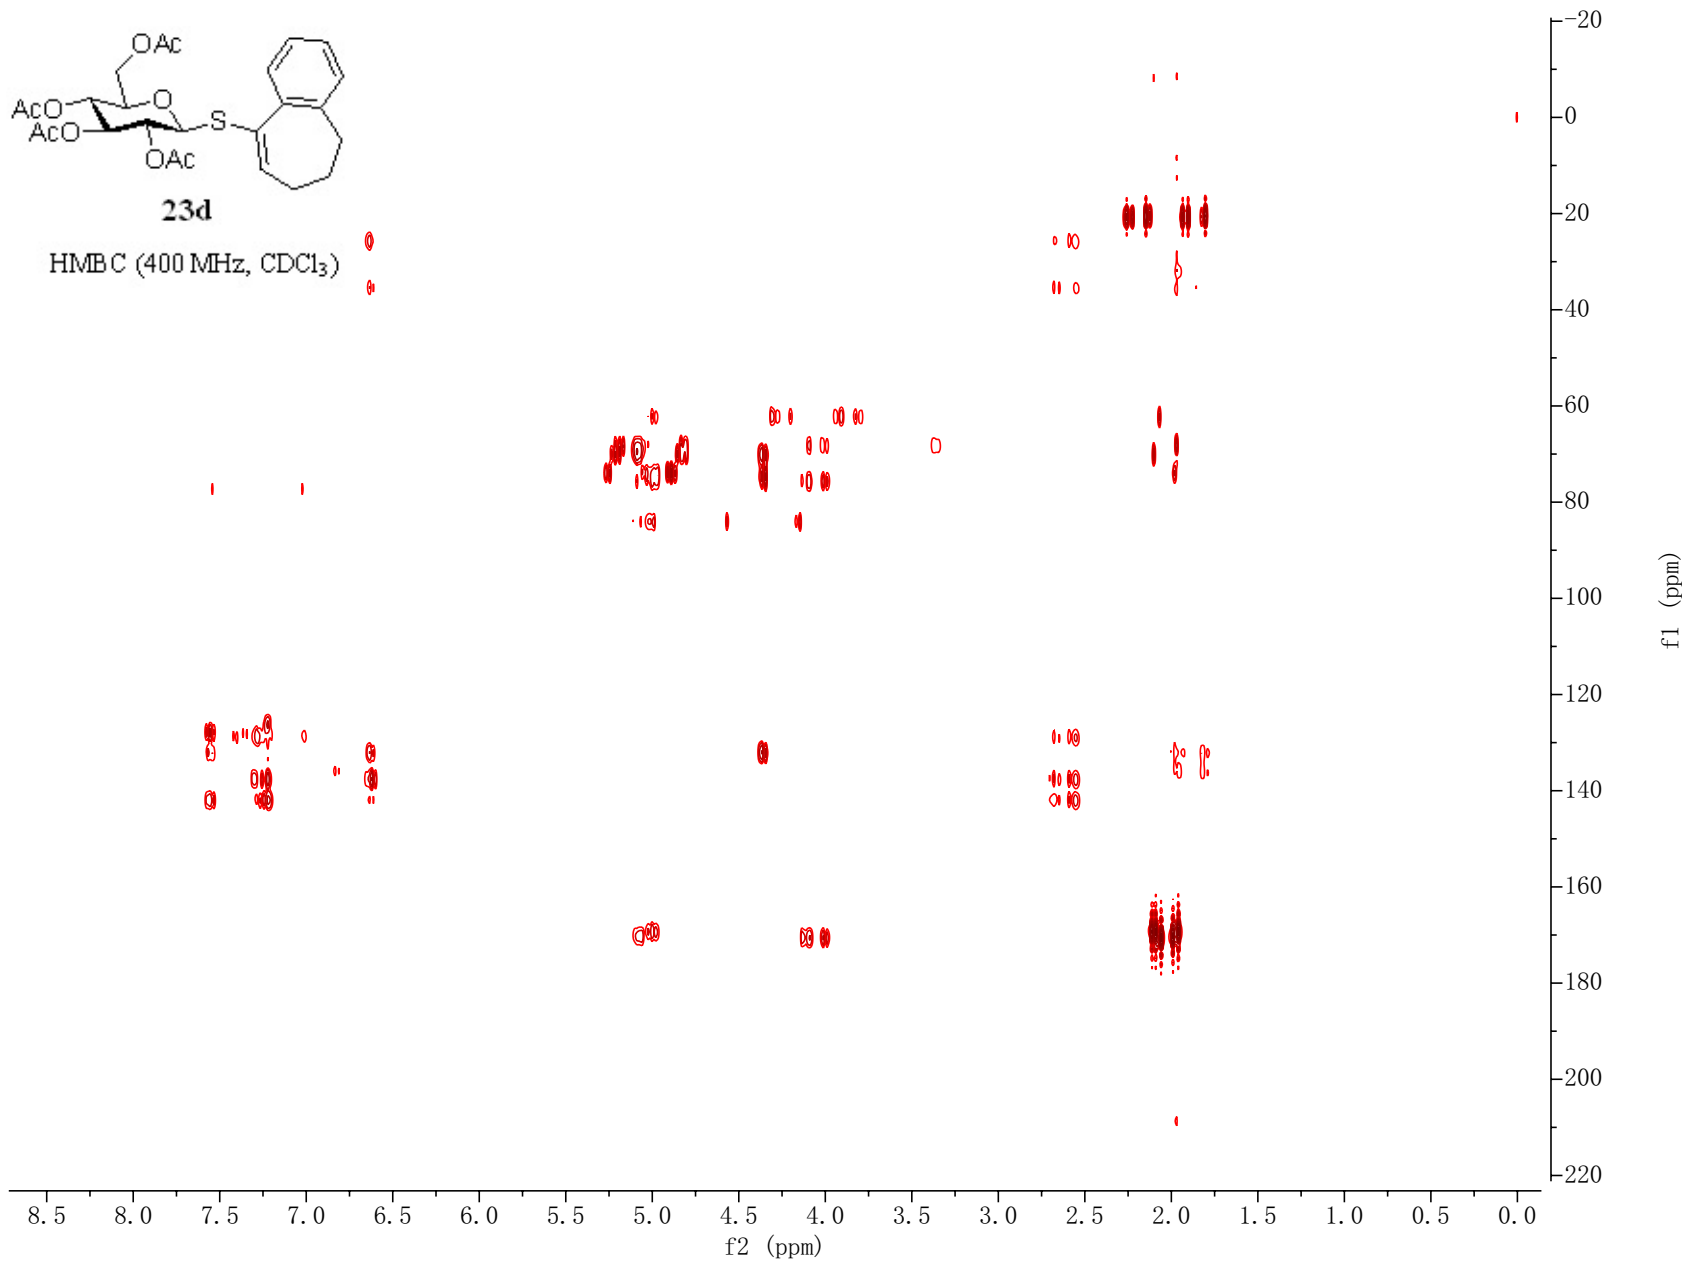

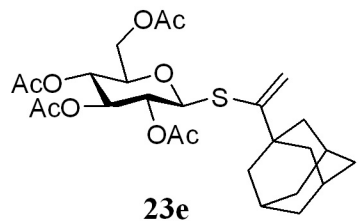

$^1\text{H NMR}$  (400 MHz,  $\text{CDCl}_3$ )

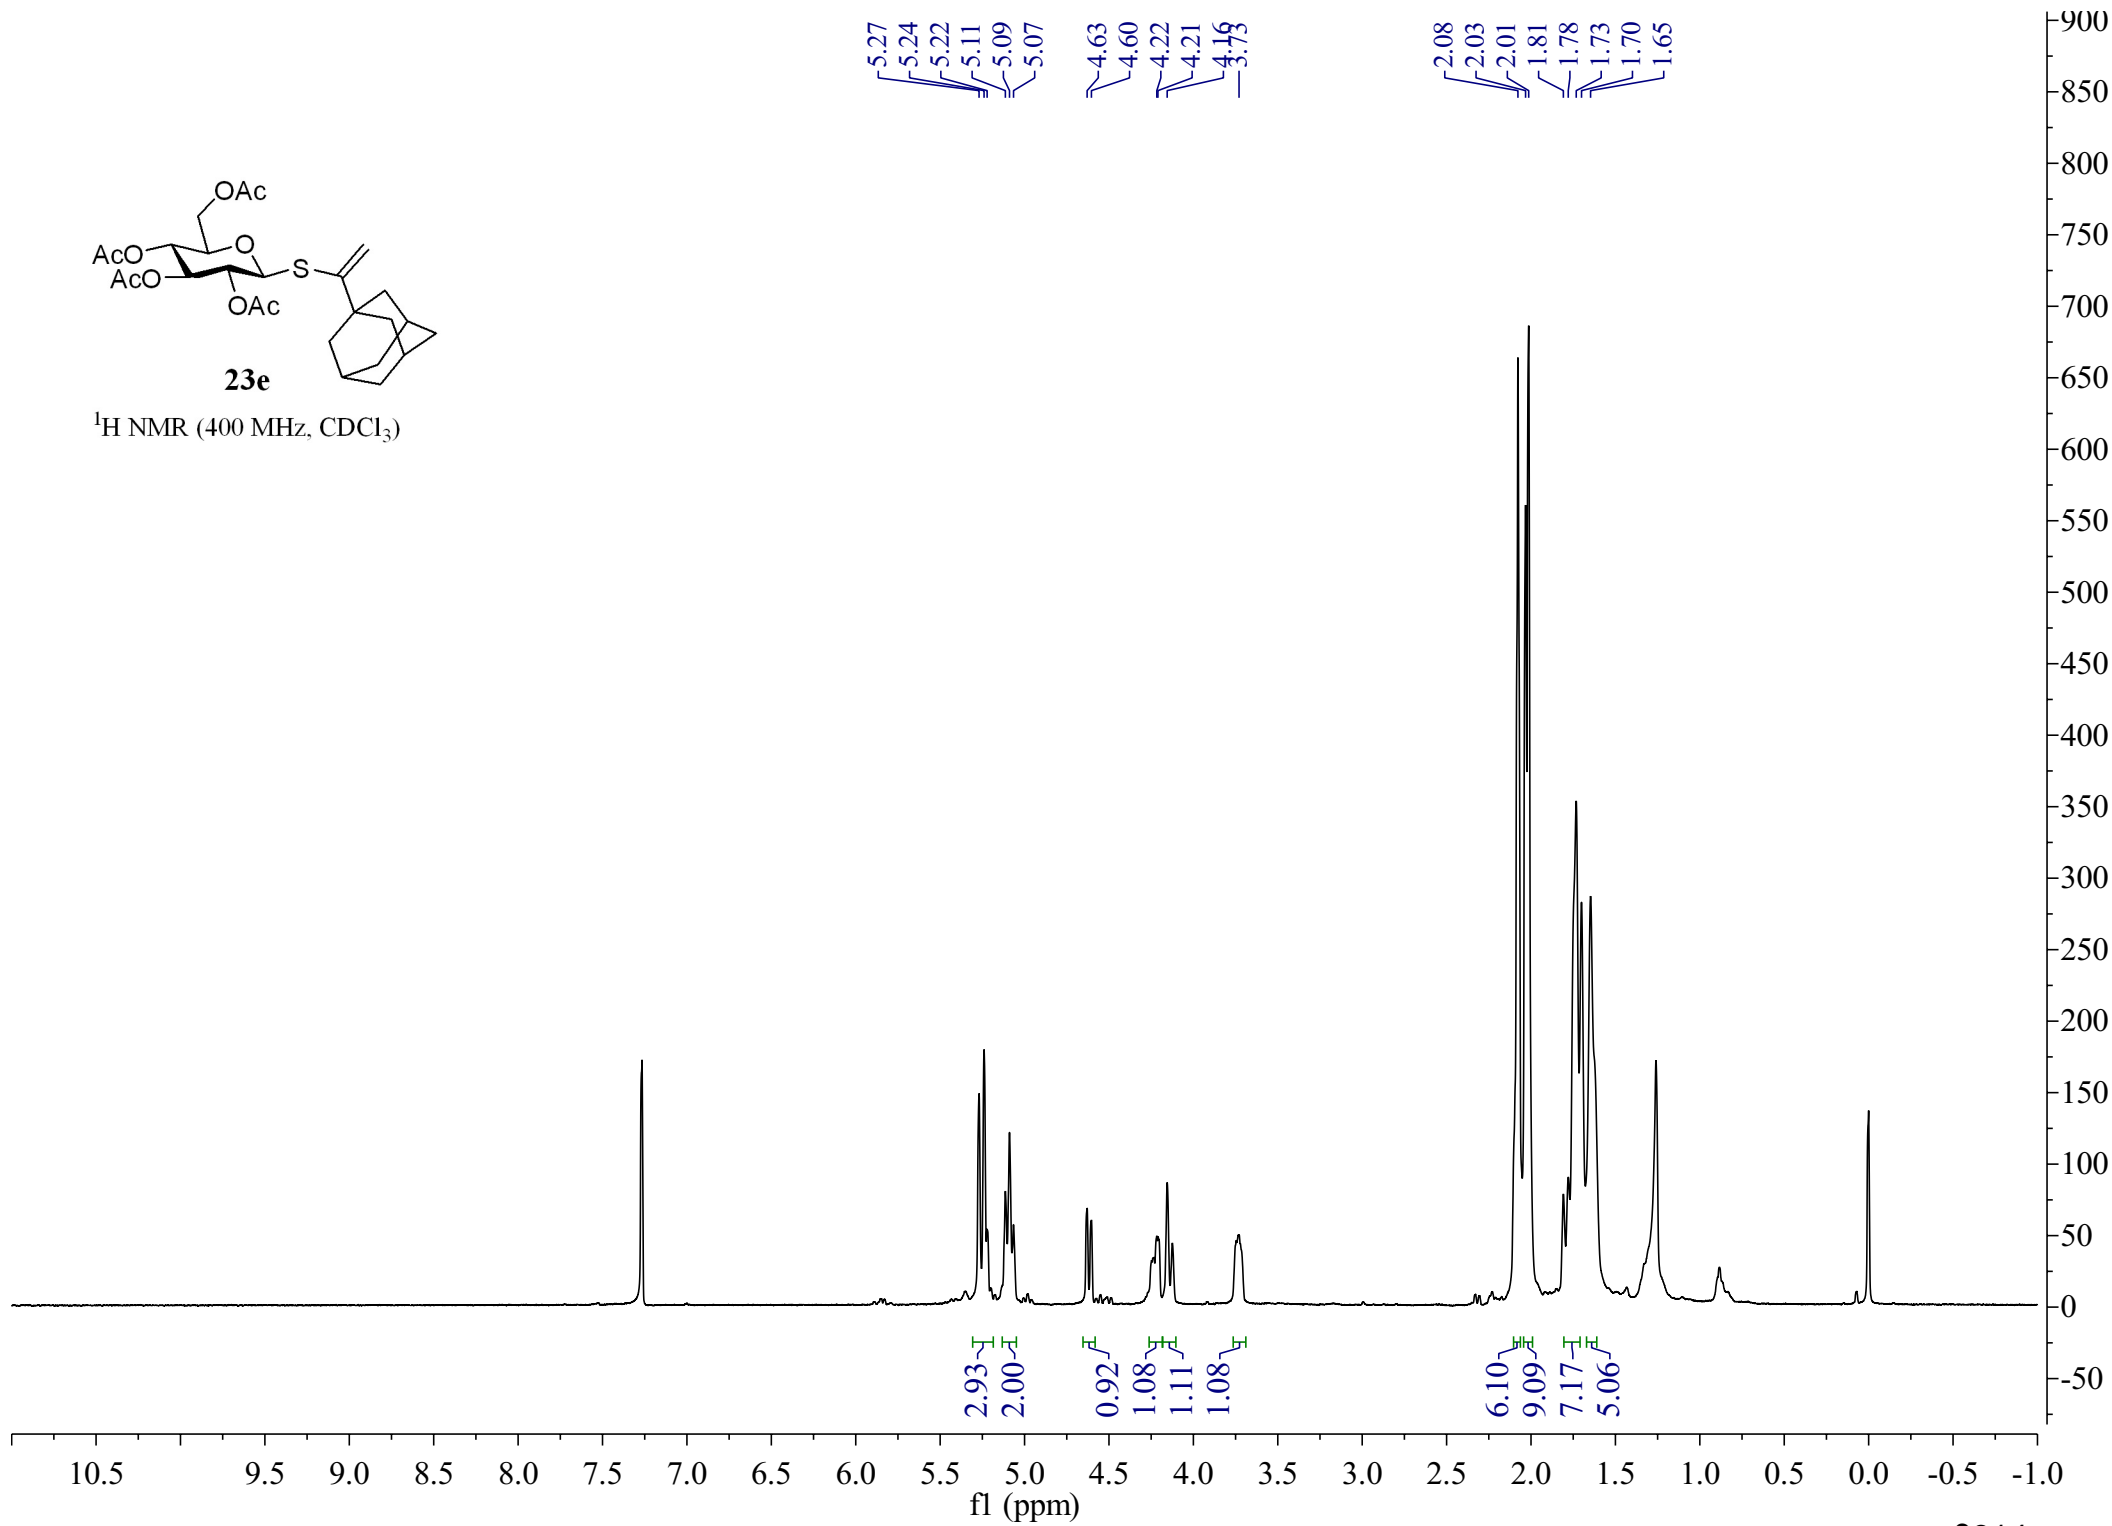

<sup>13</sup>C{<sup>1</sup>H} NMR (100 MHz, CDCl<sub>3</sub>)

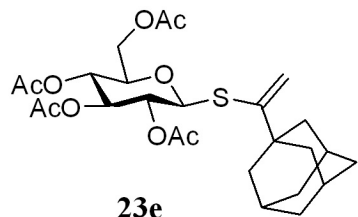

170.67  
170.26  
169.44

155.48

110.90

86.98

75.70

74.00

70.01

68.37

62.39

41.13

39.75

38.27

36.62

36.56

28.48

27.95

20.75

20.65

20.62

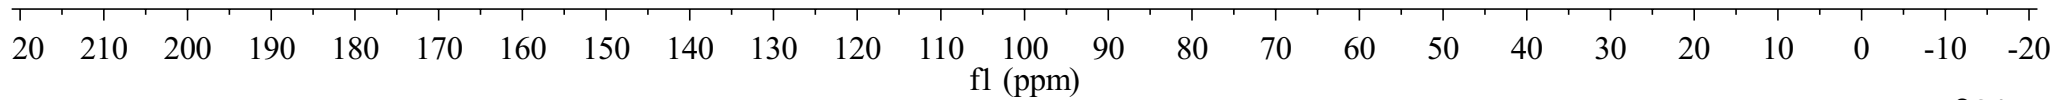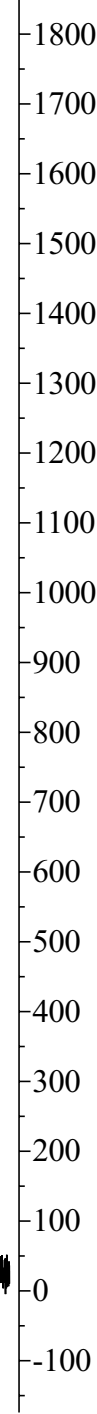

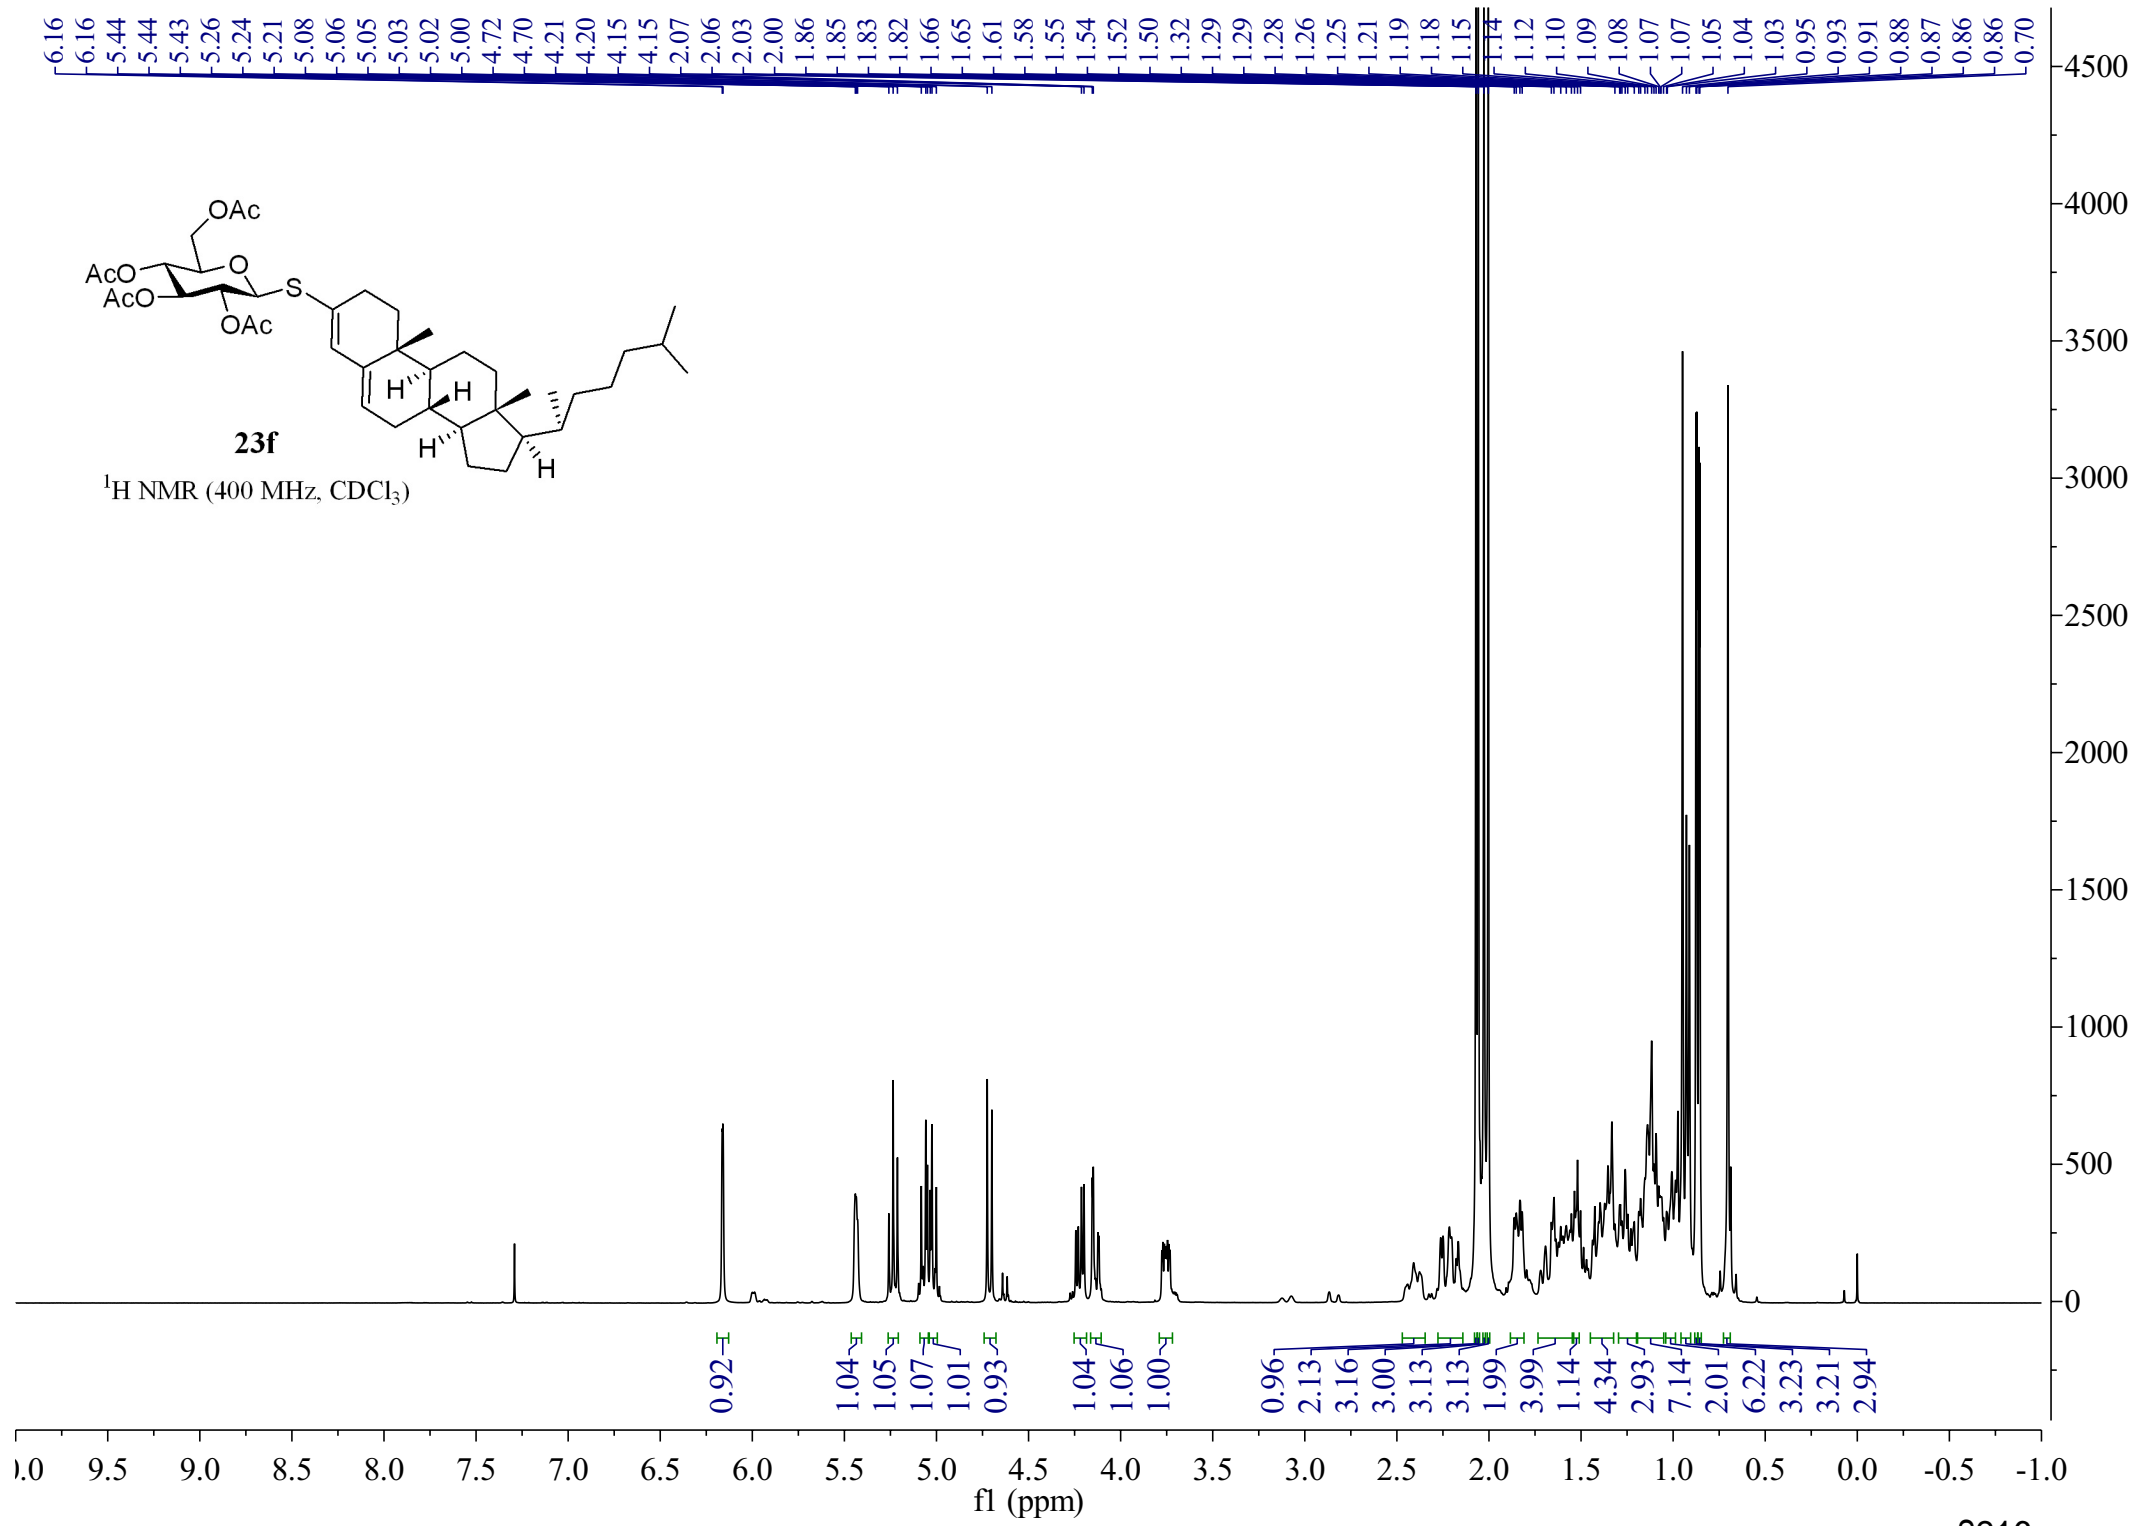

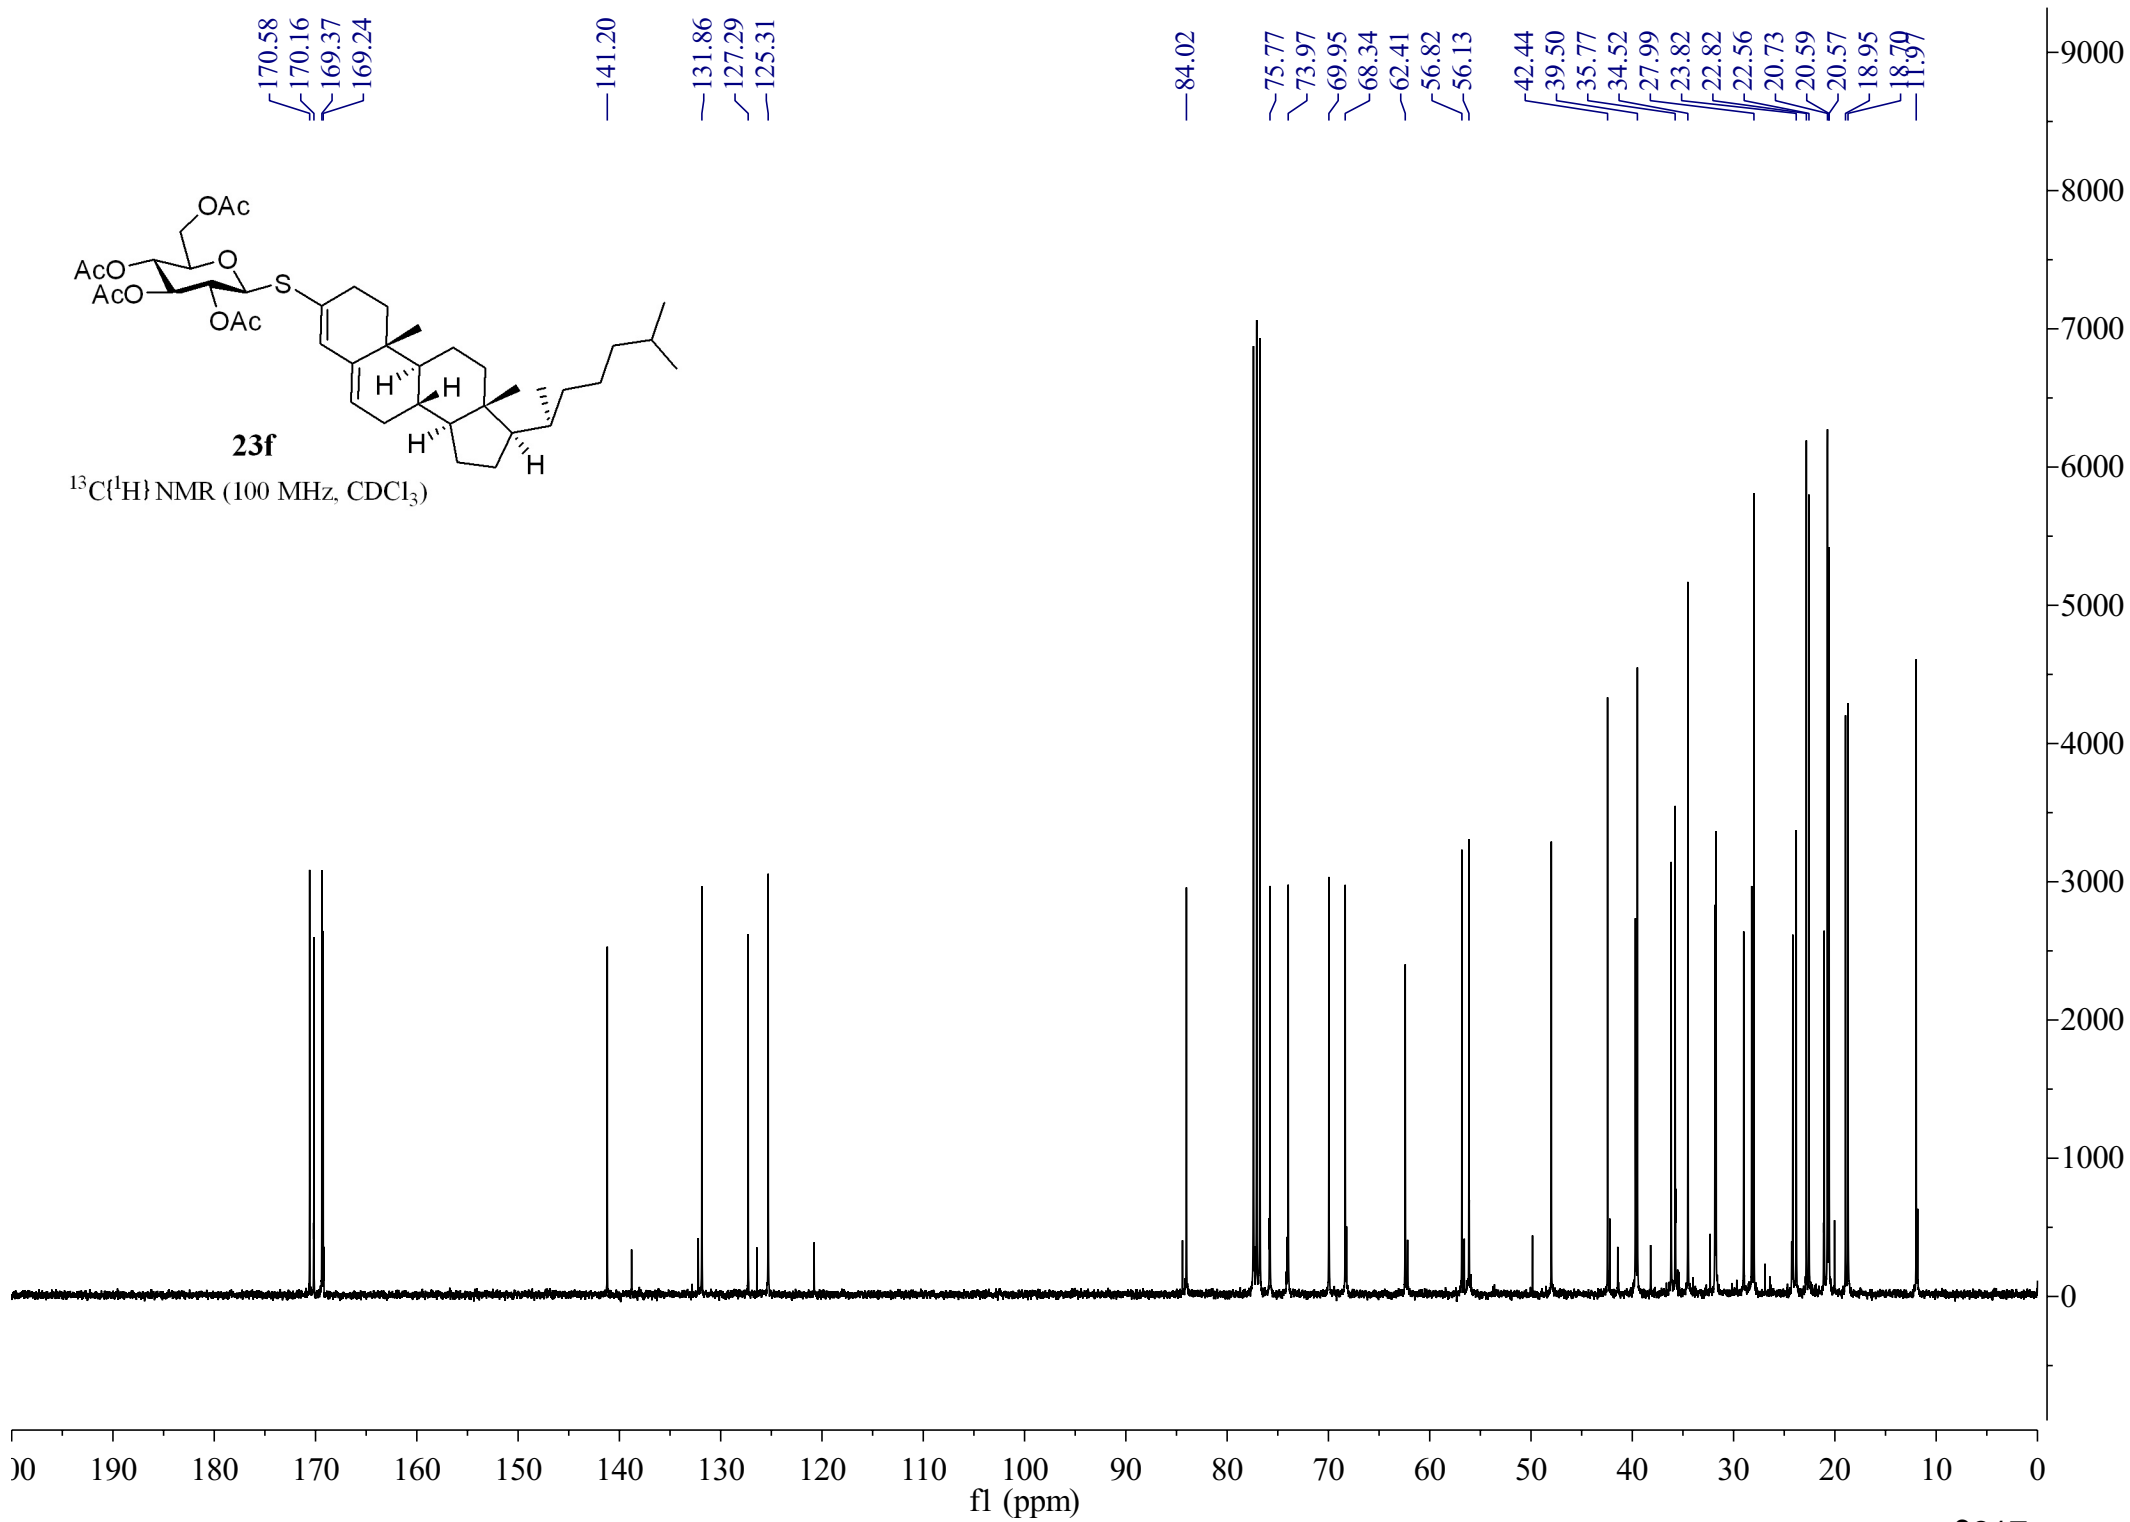



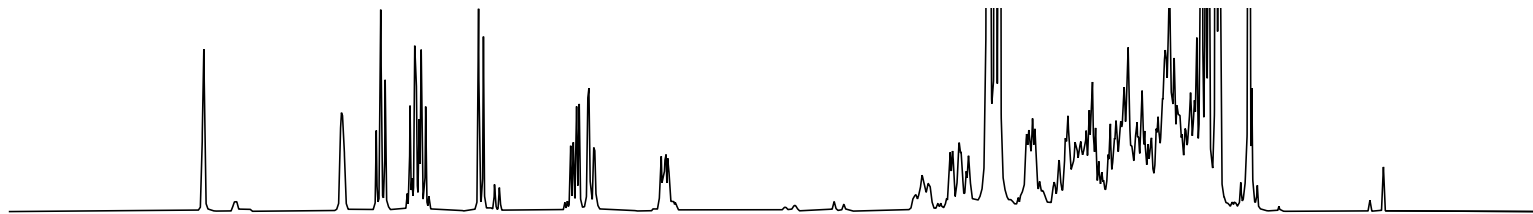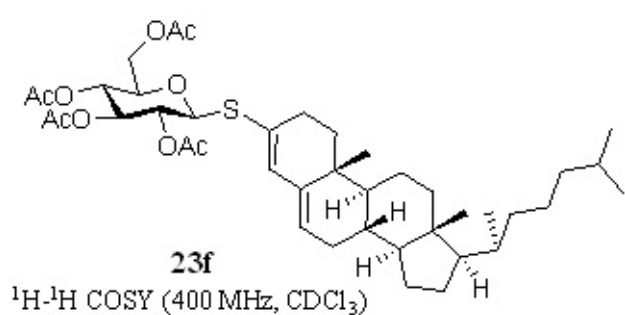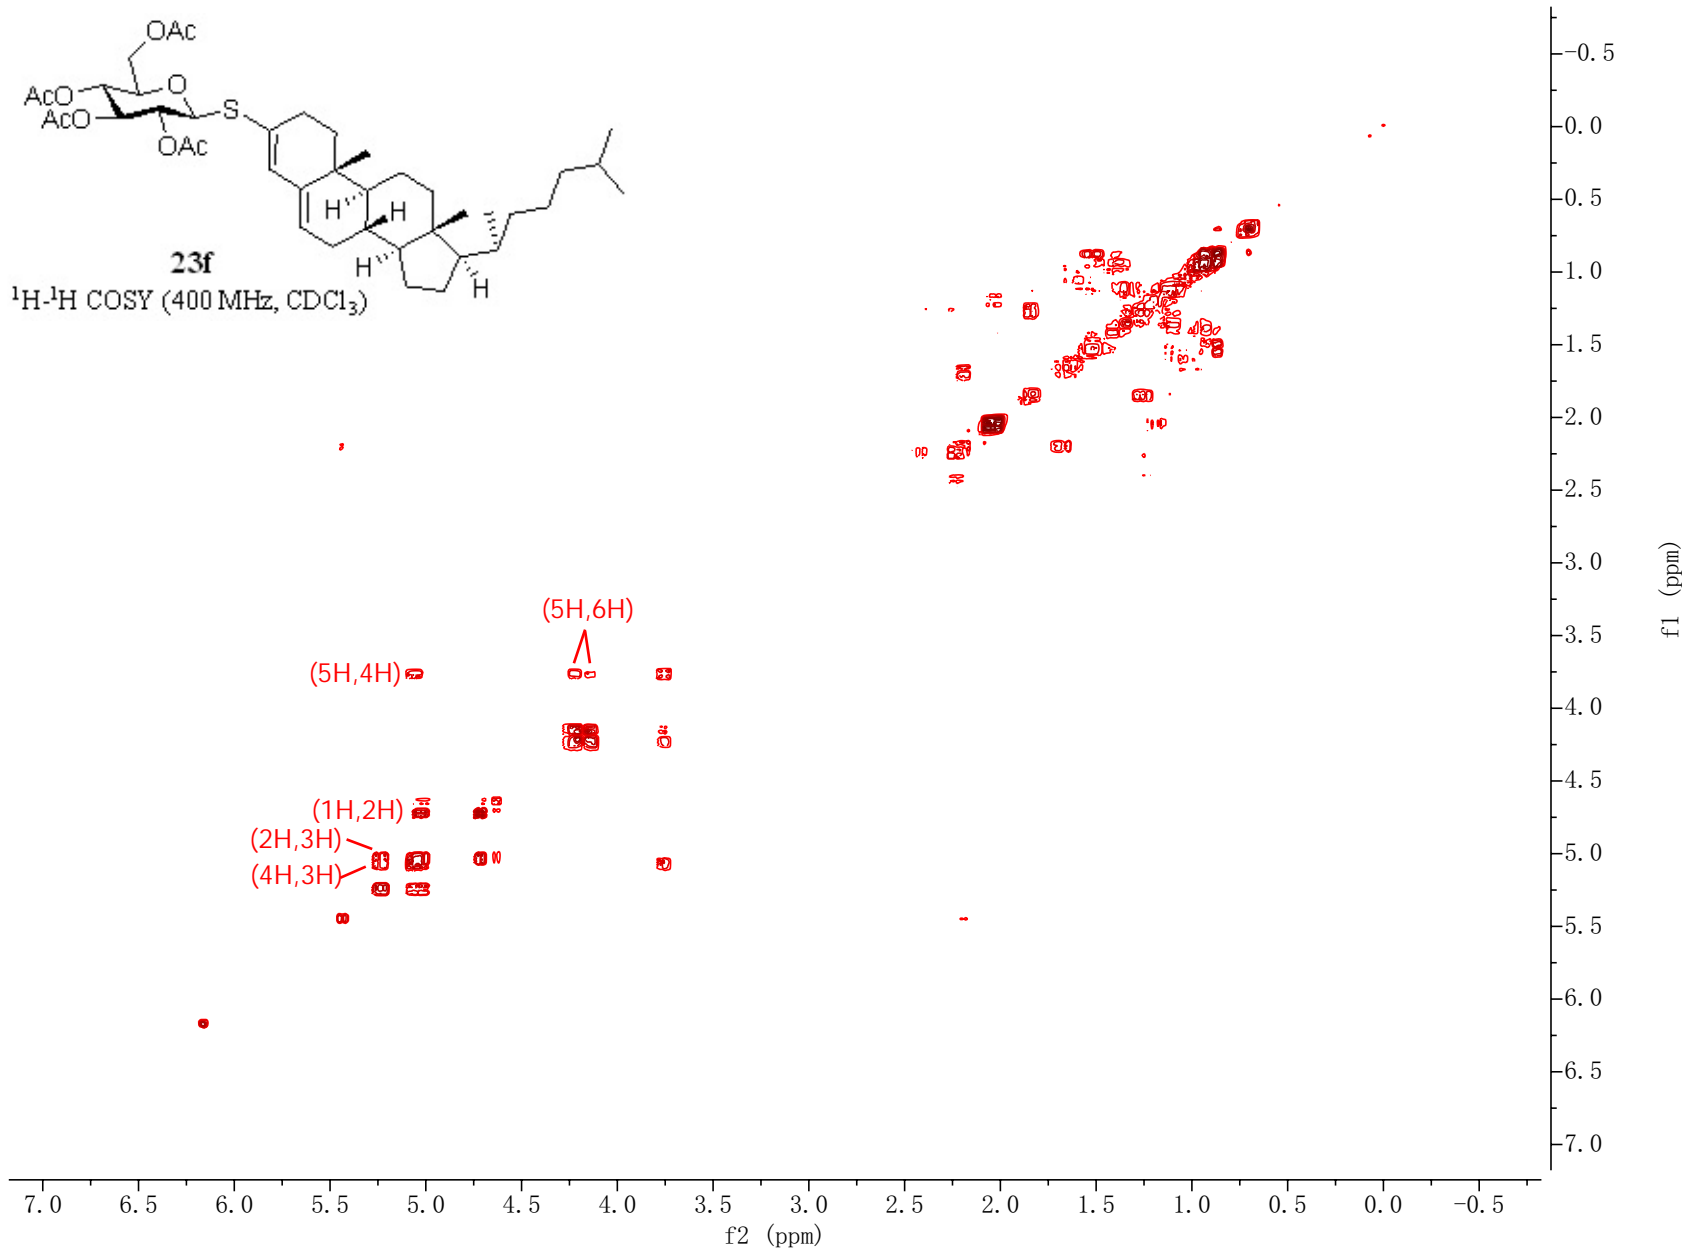

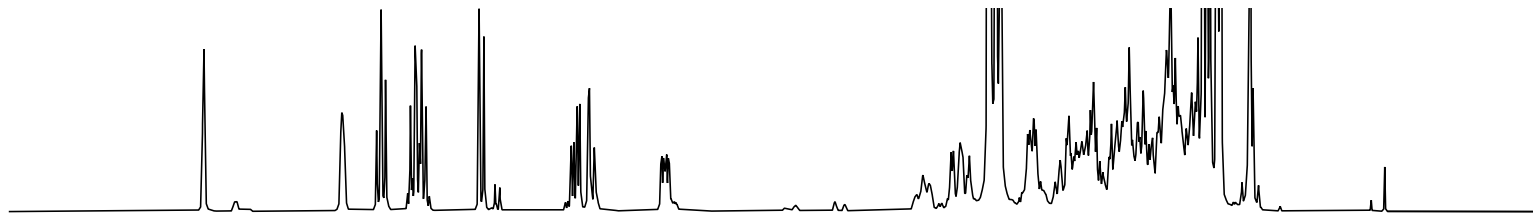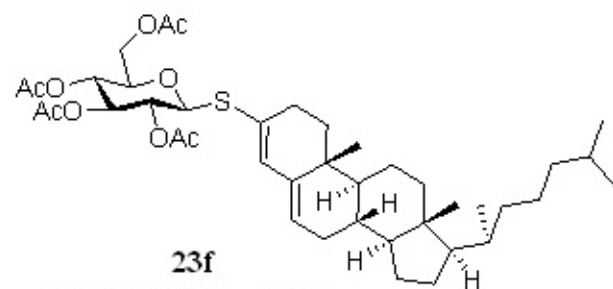

HSQC (400 MHz, CDCl<sub>3</sub>)

(4C,4H)

(2C,2H)

(3C,3H)

(1C,1H)

(6C,6H)

(5C,5H)

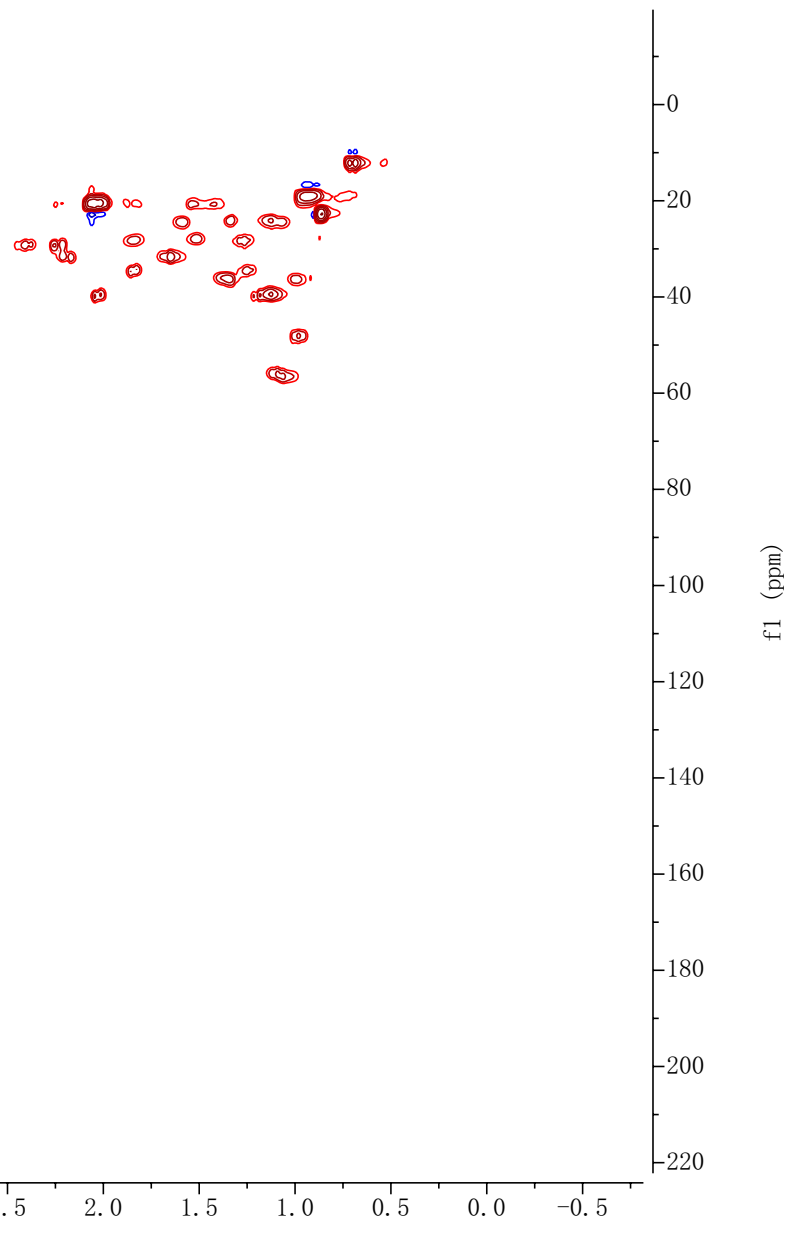

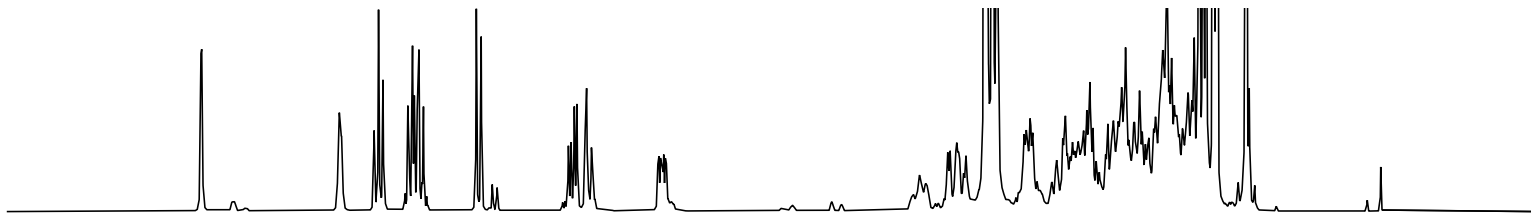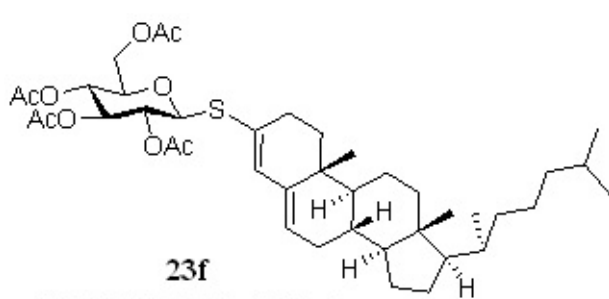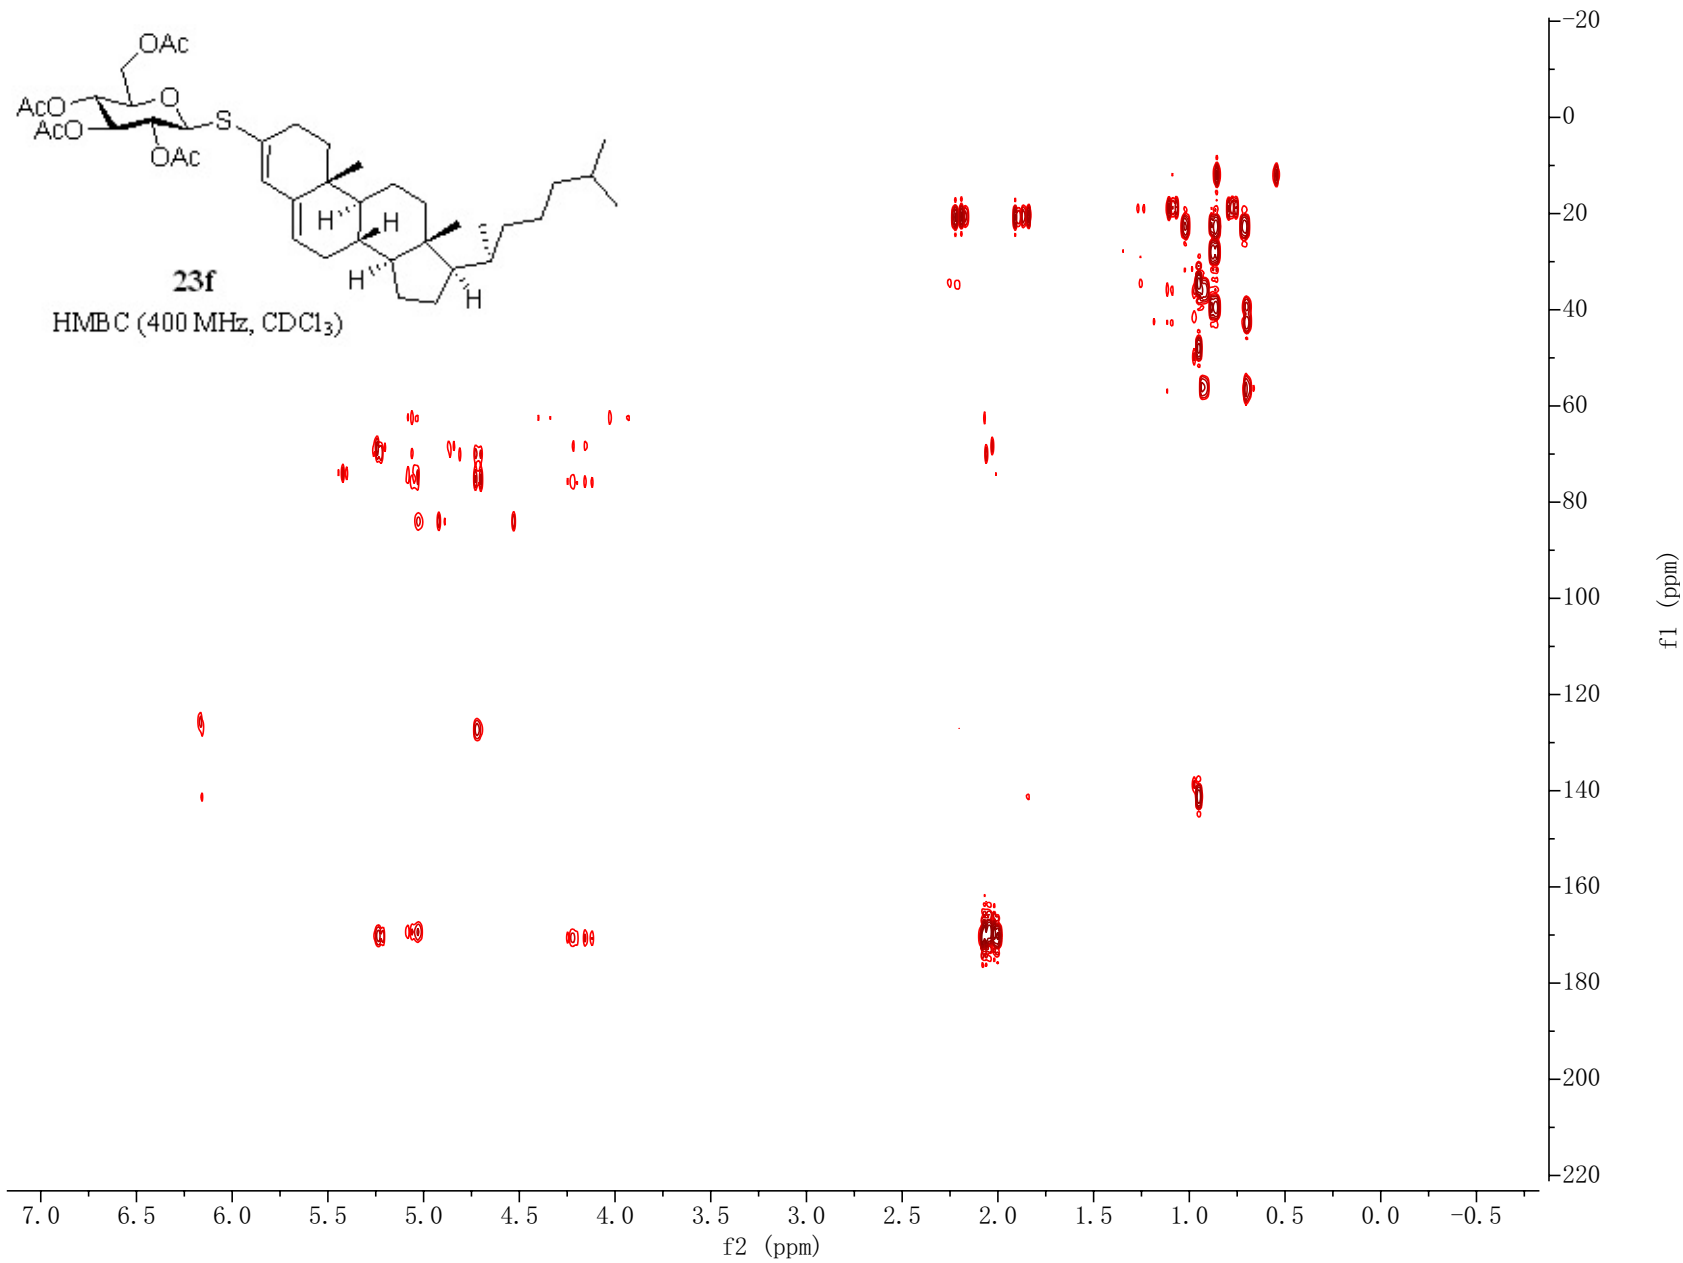

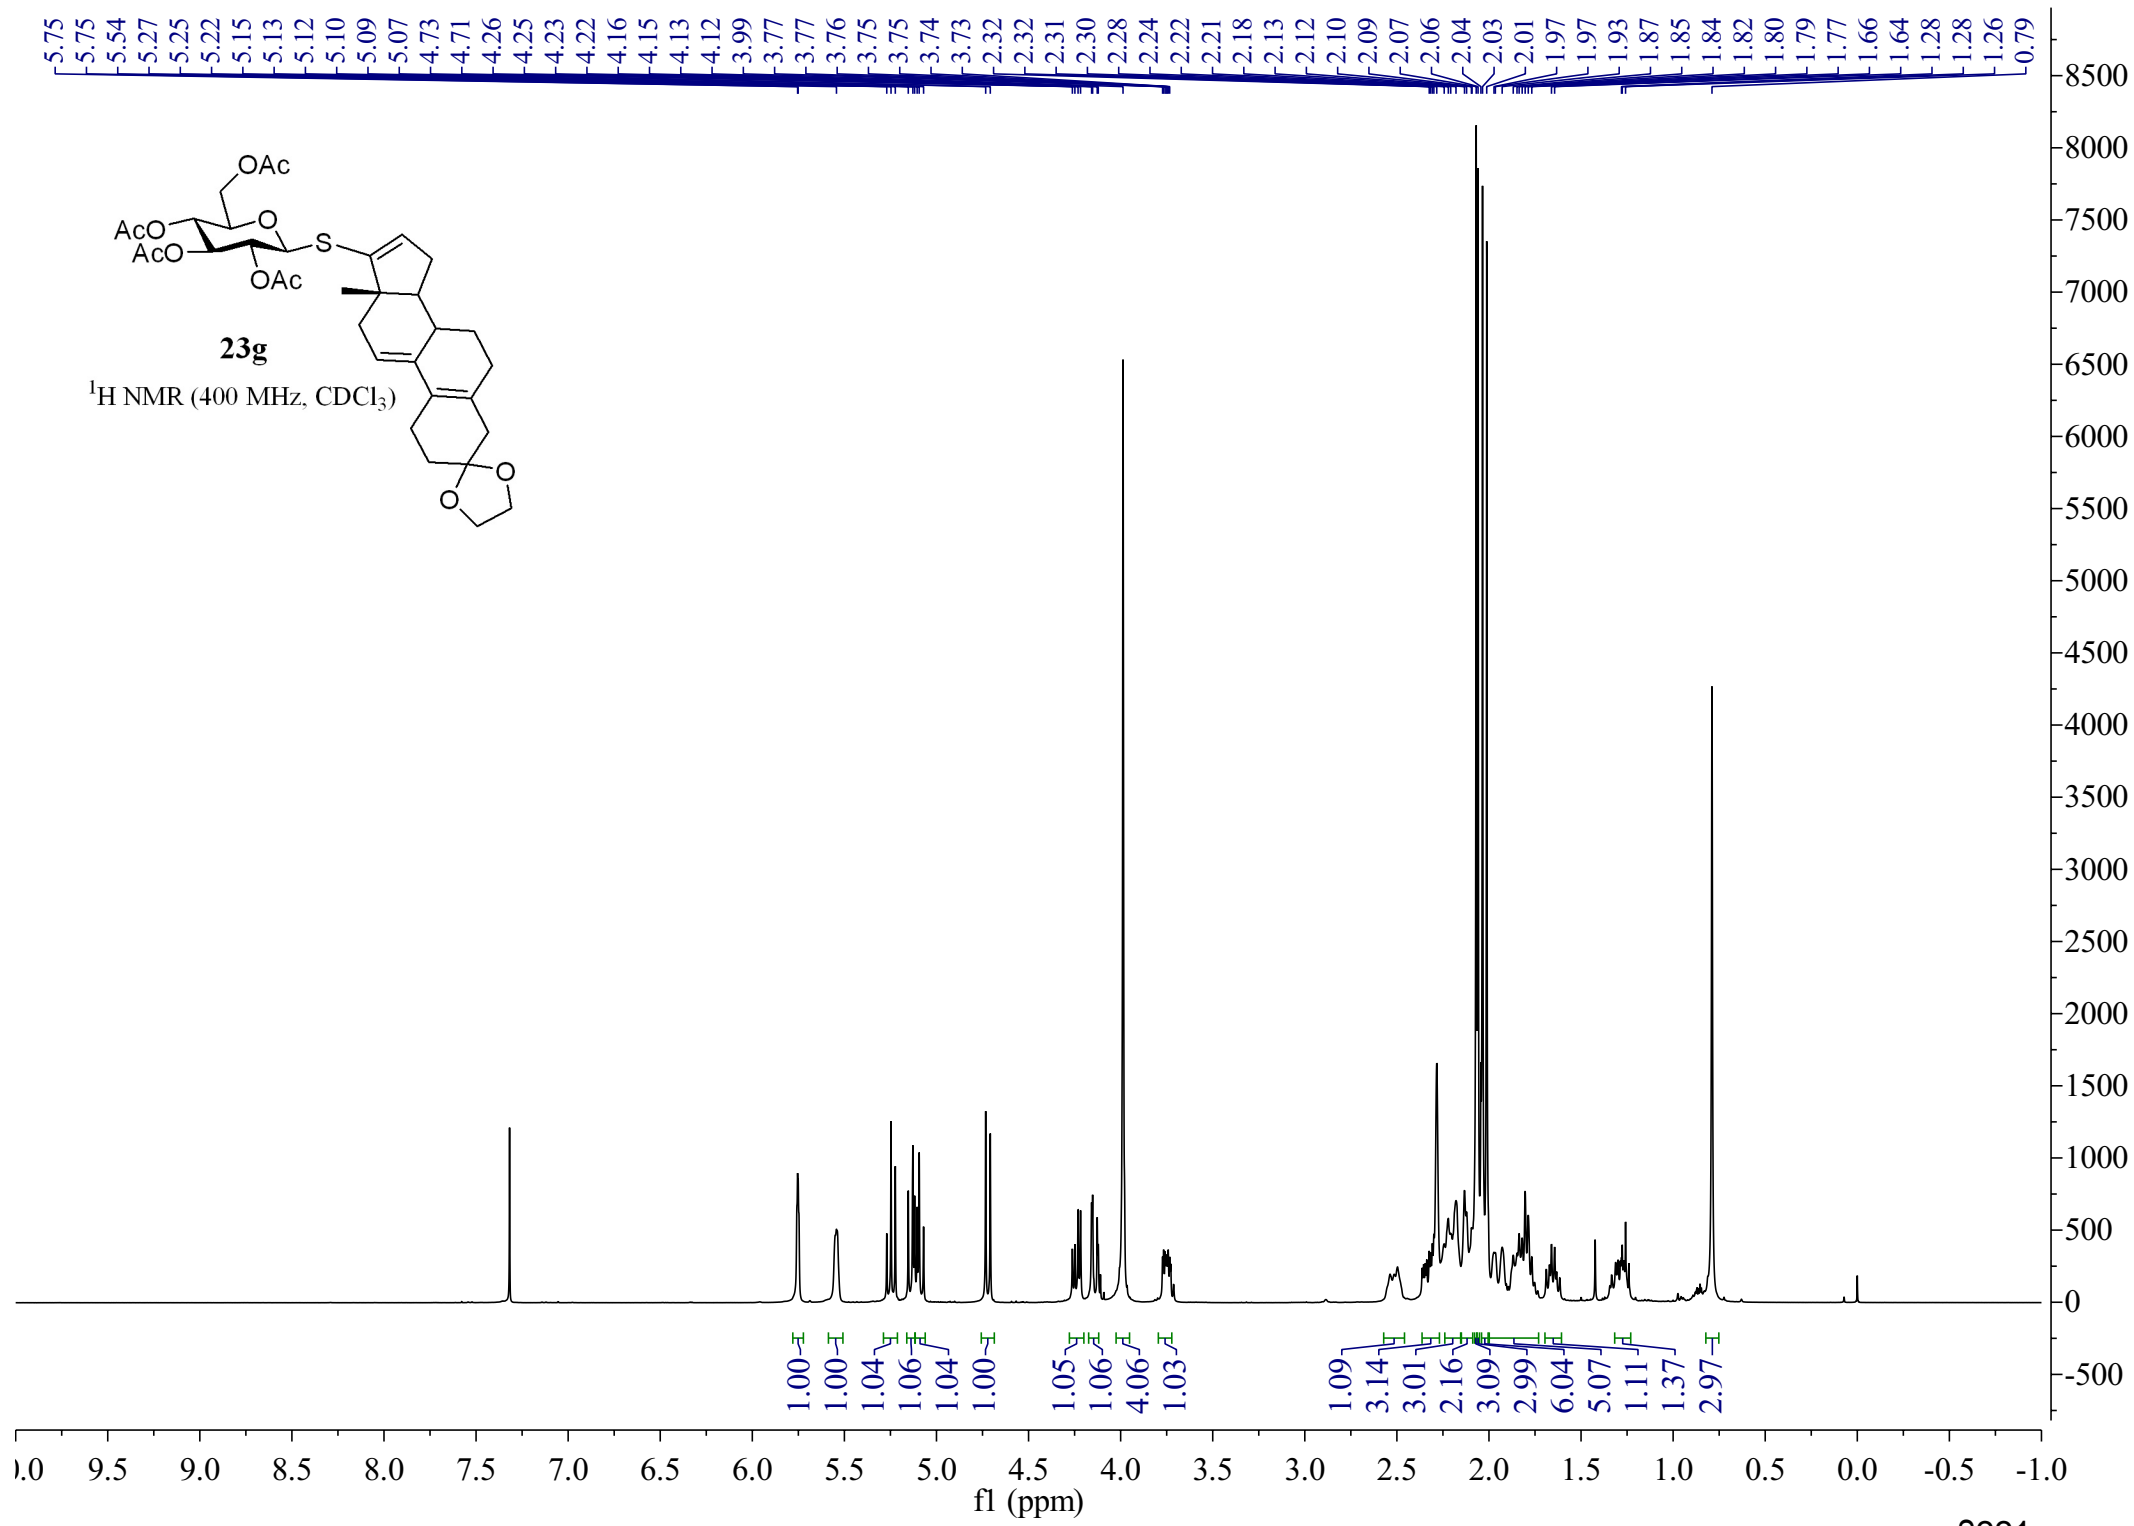

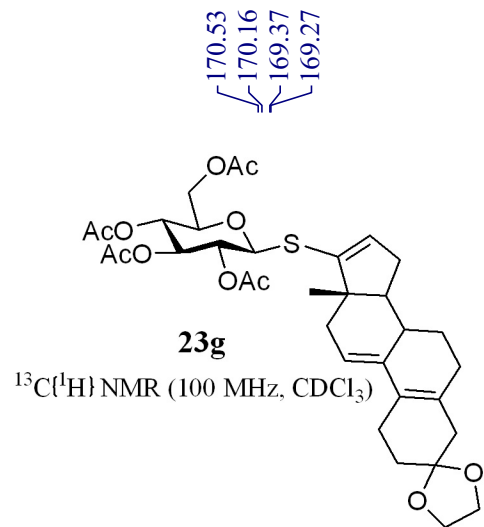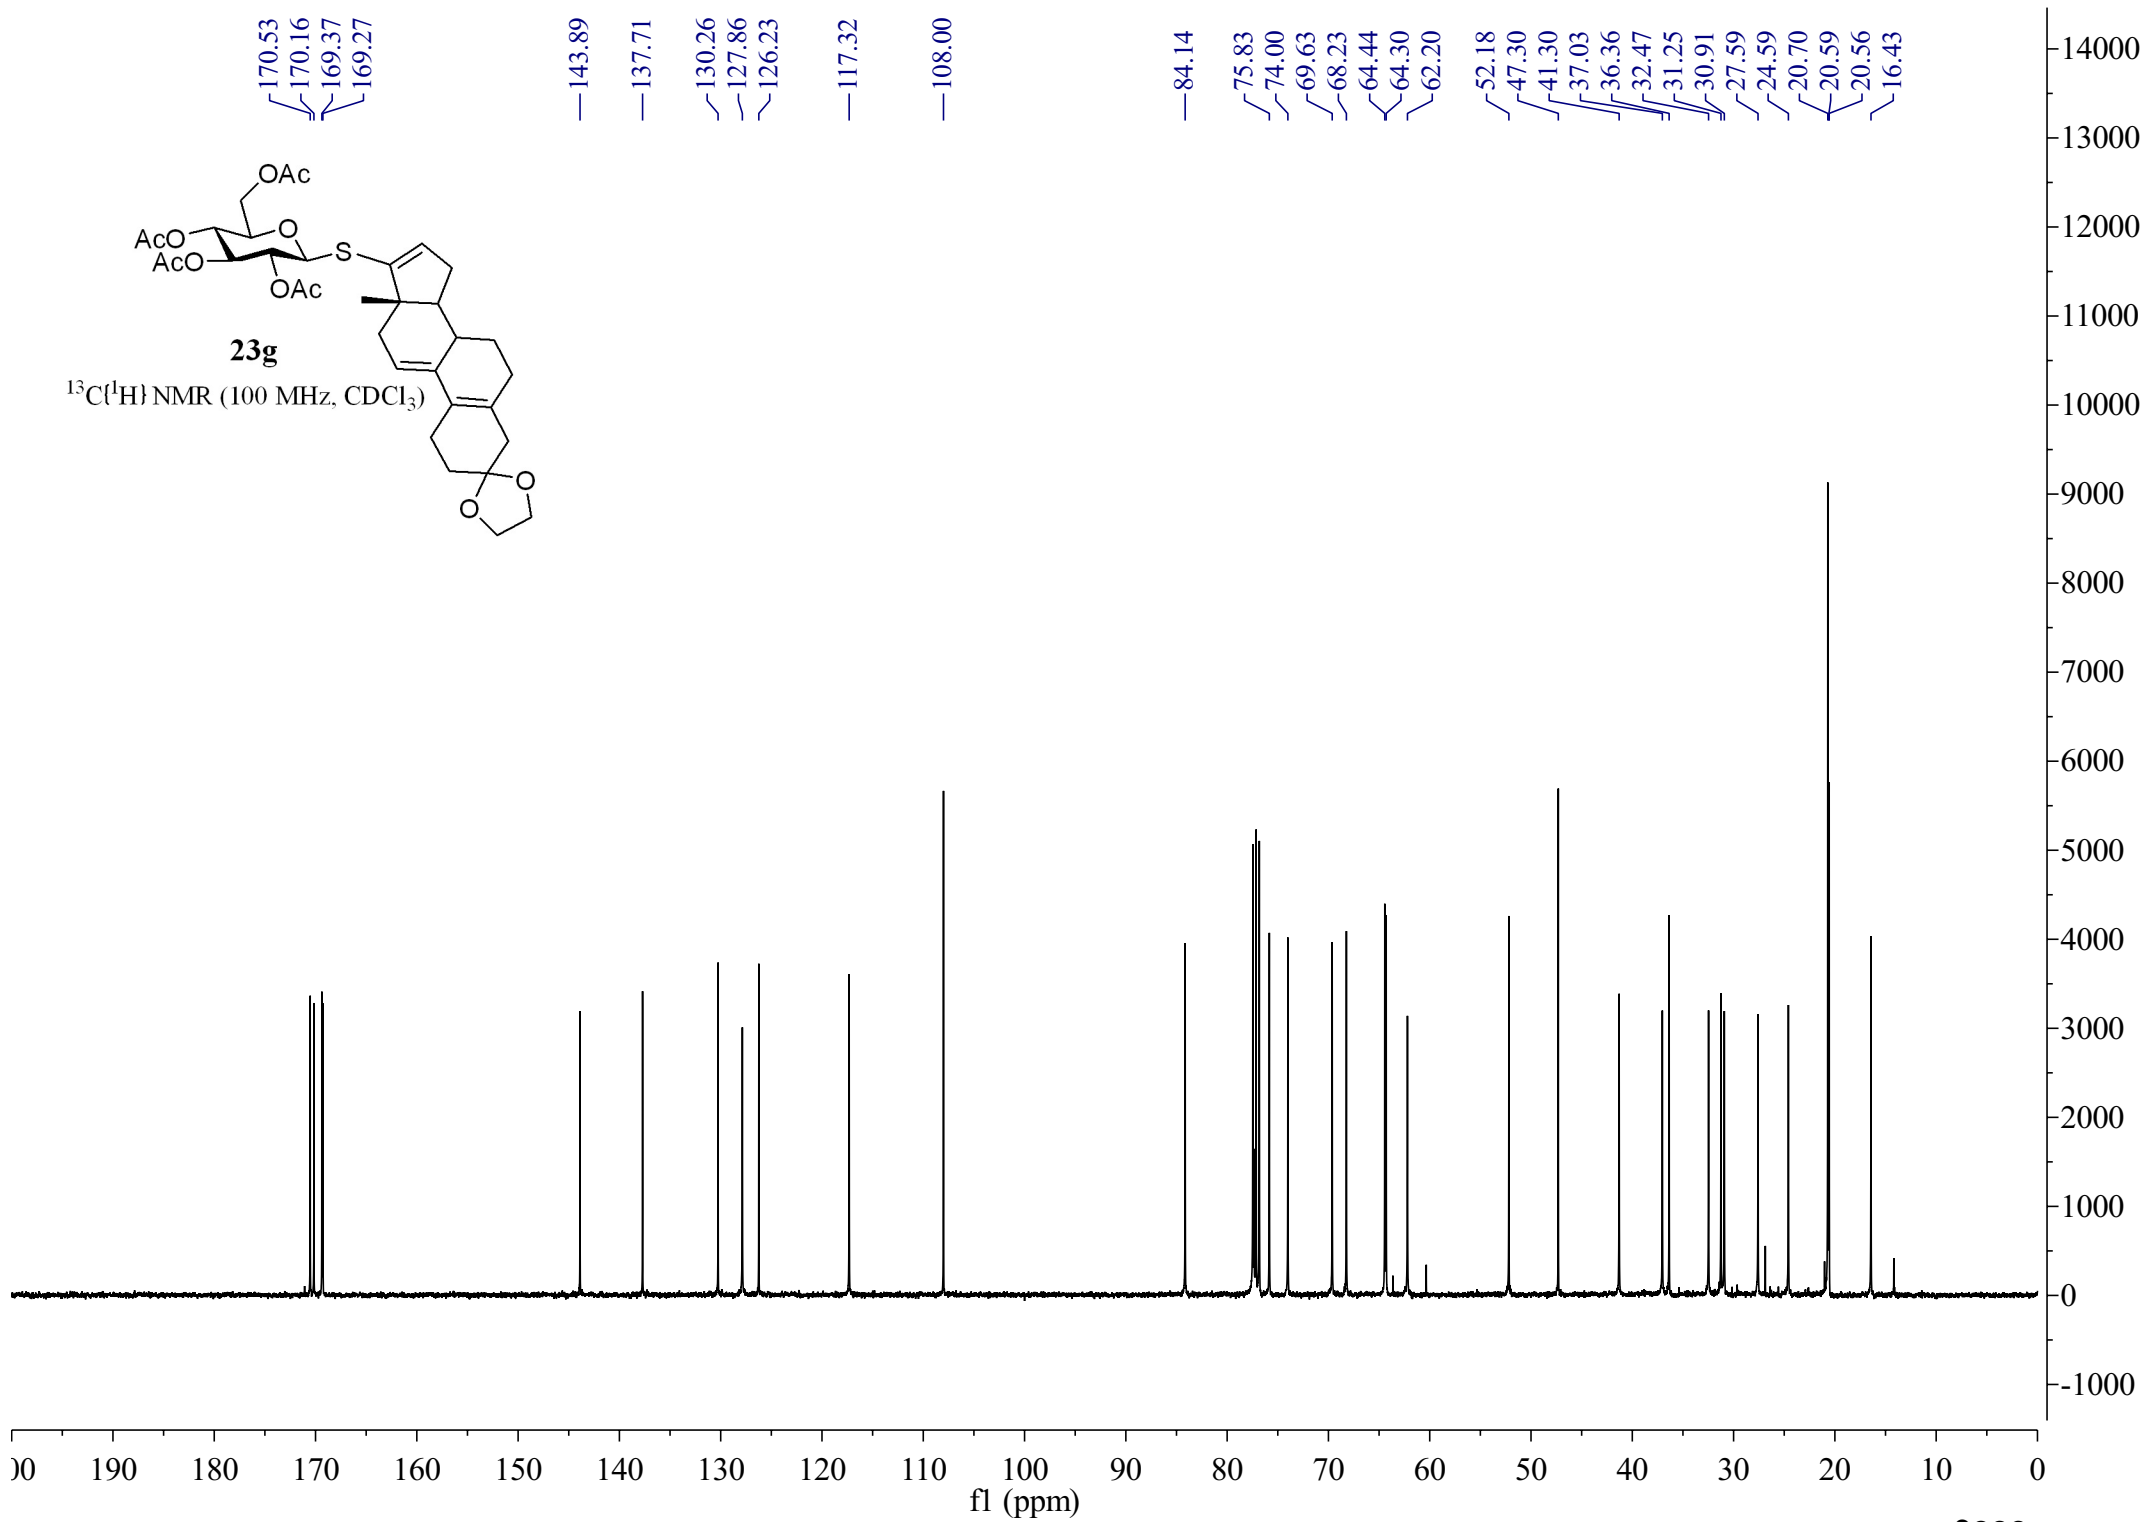

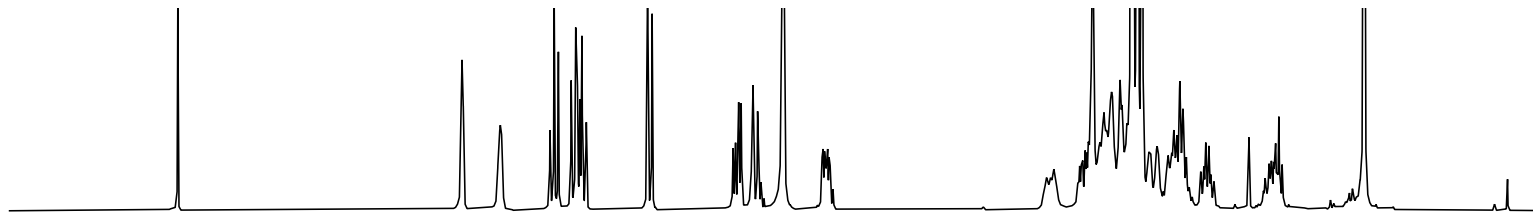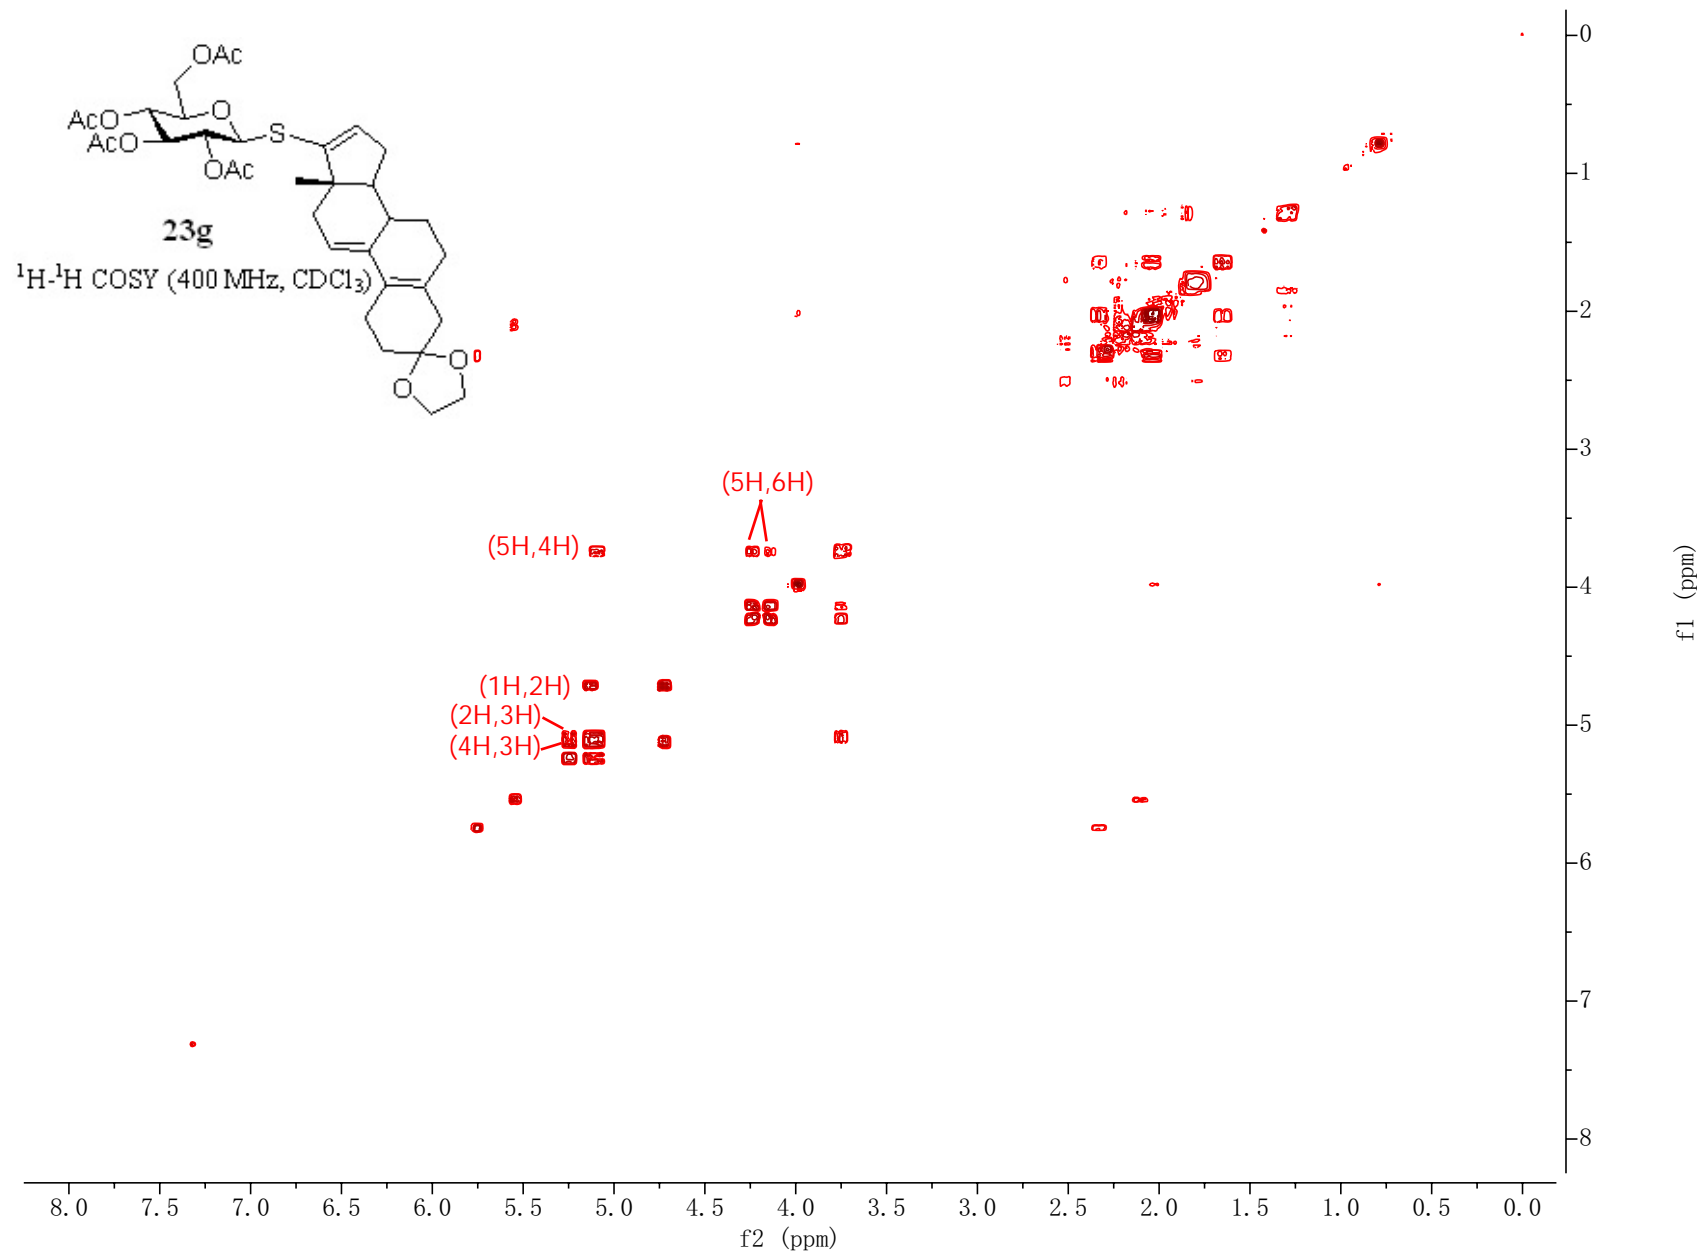

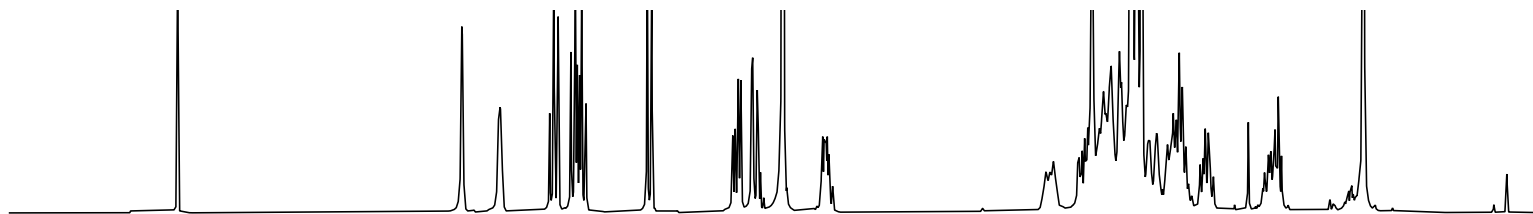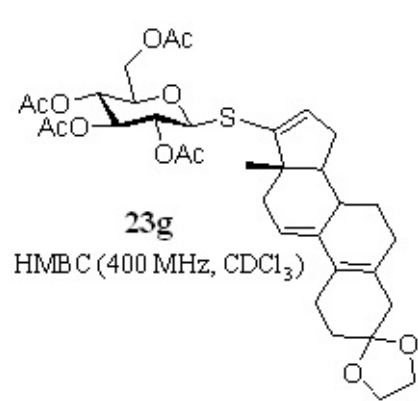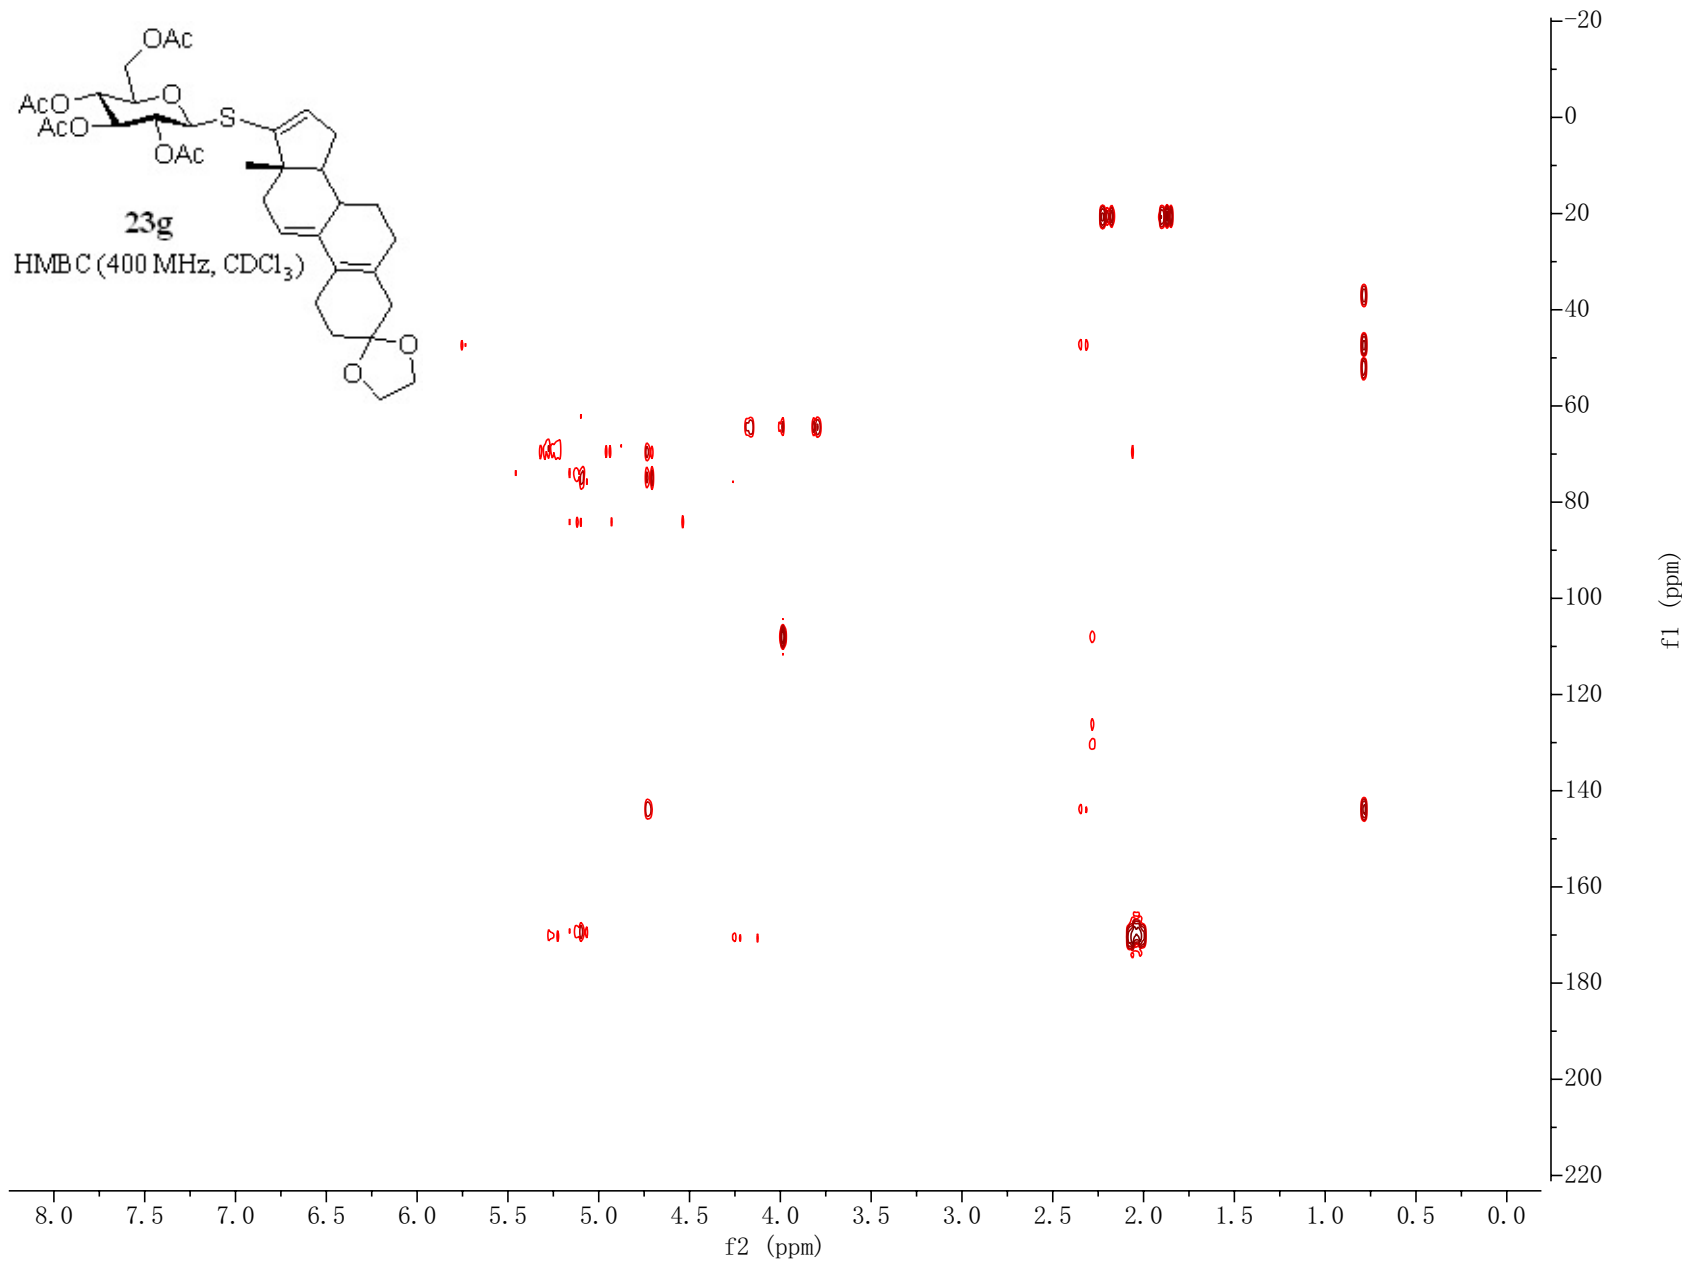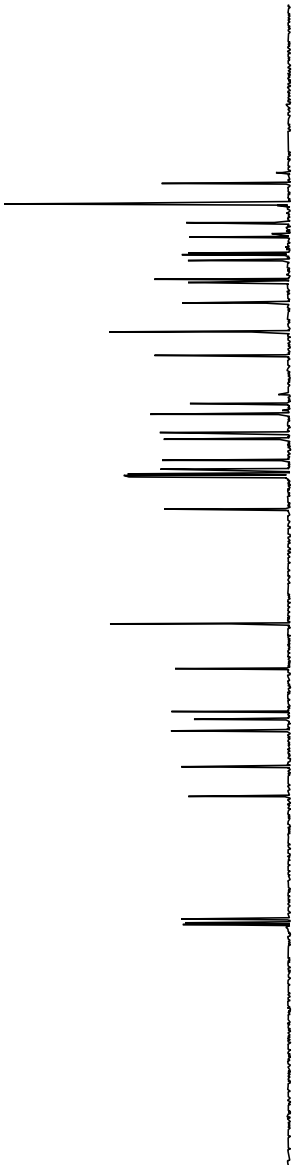

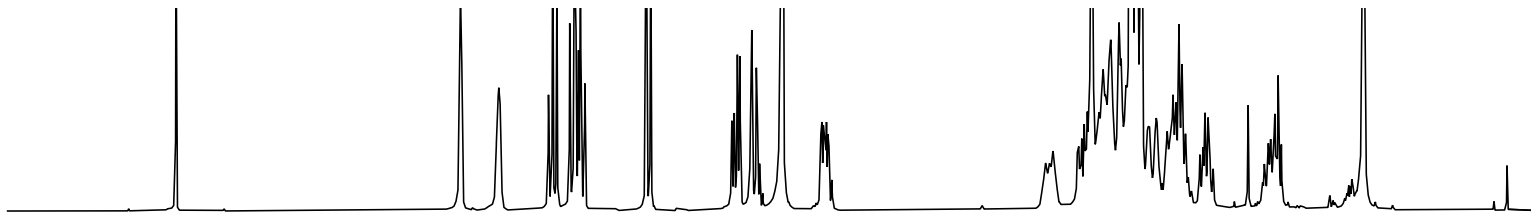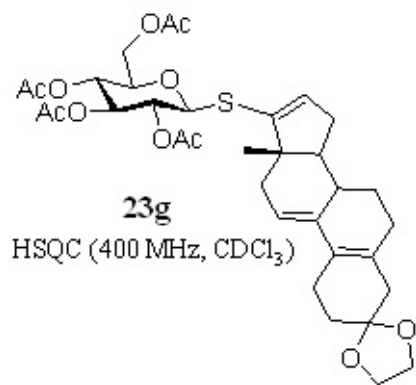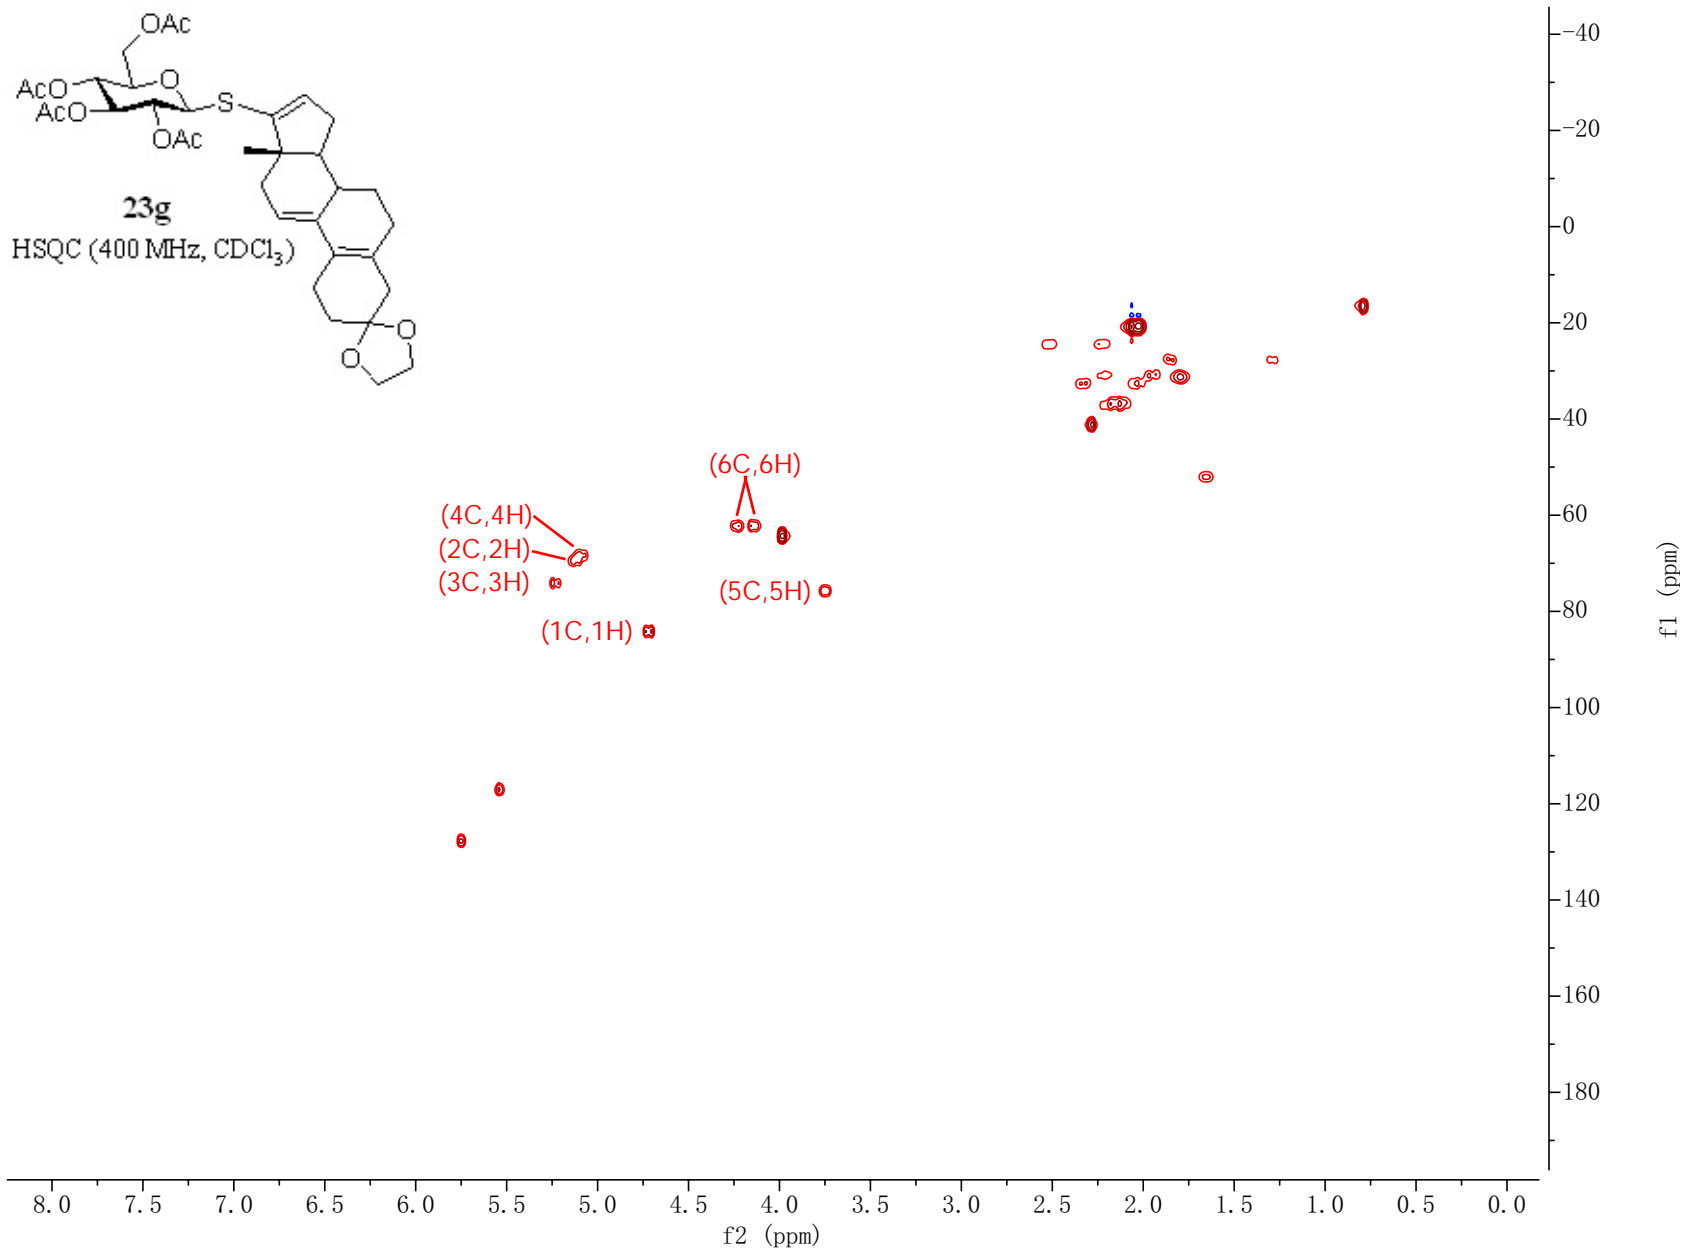



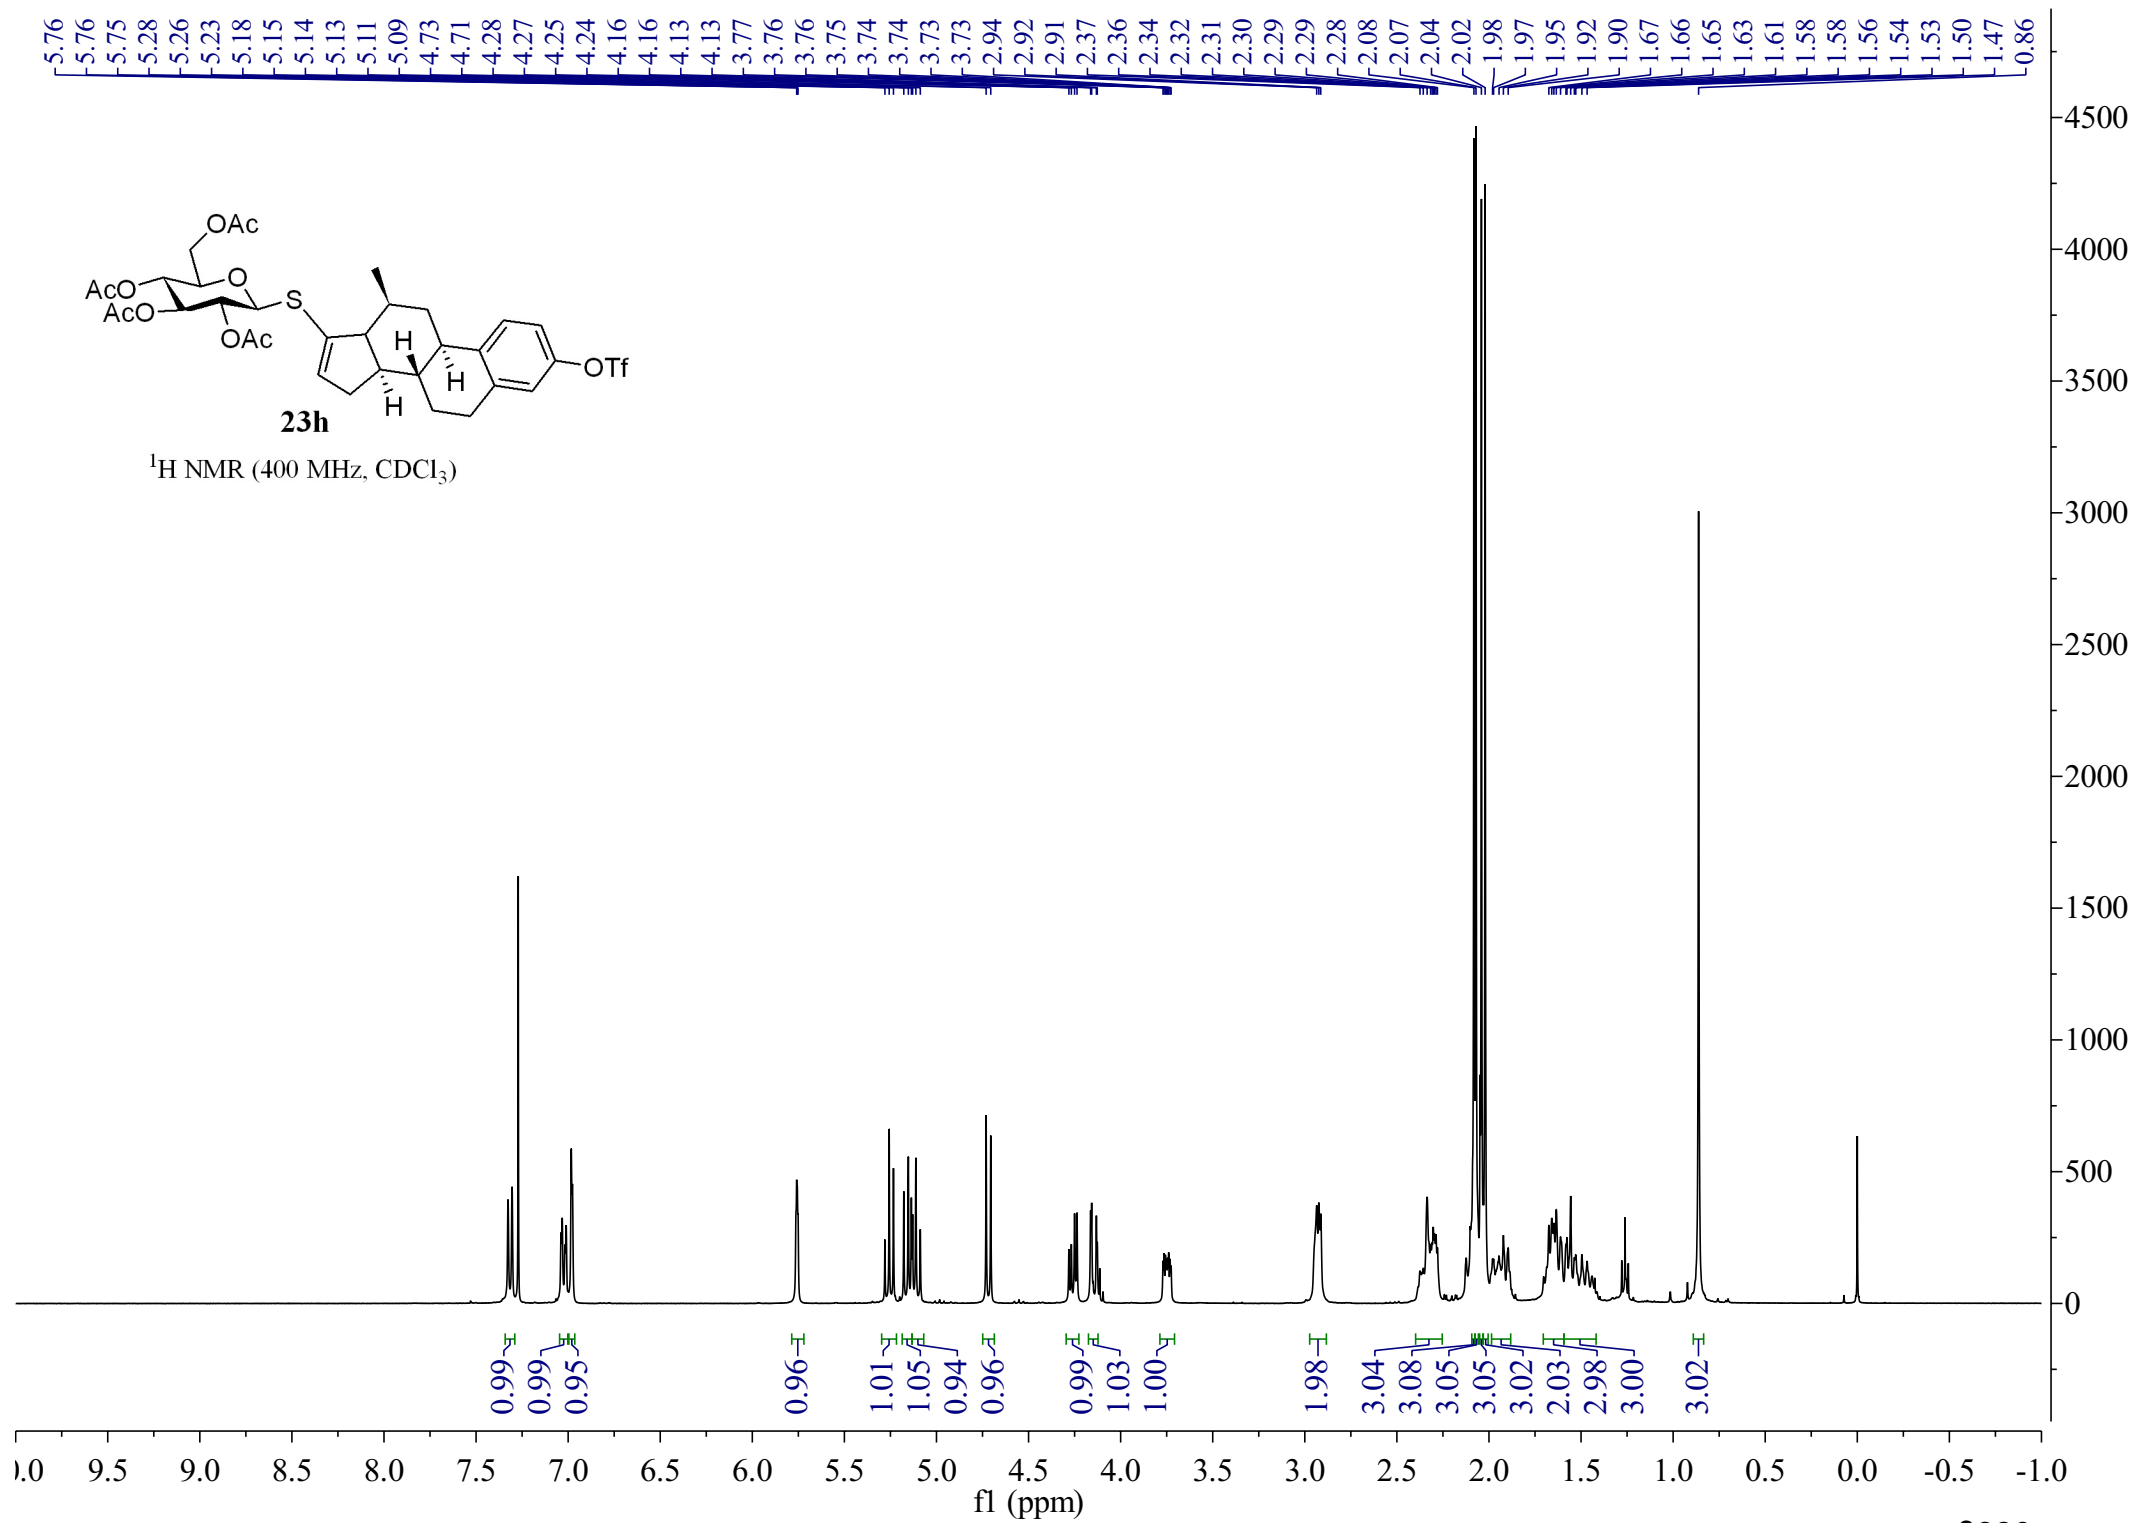

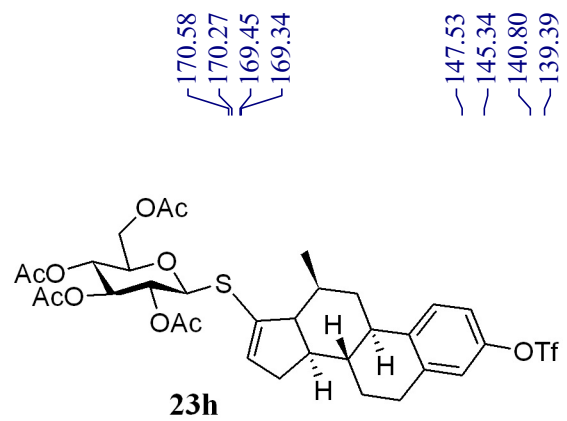

$^{13}\text{C}\{^1\text{H}\}$  NMR (100 MHz,  $\text{CDCl}_3$ )

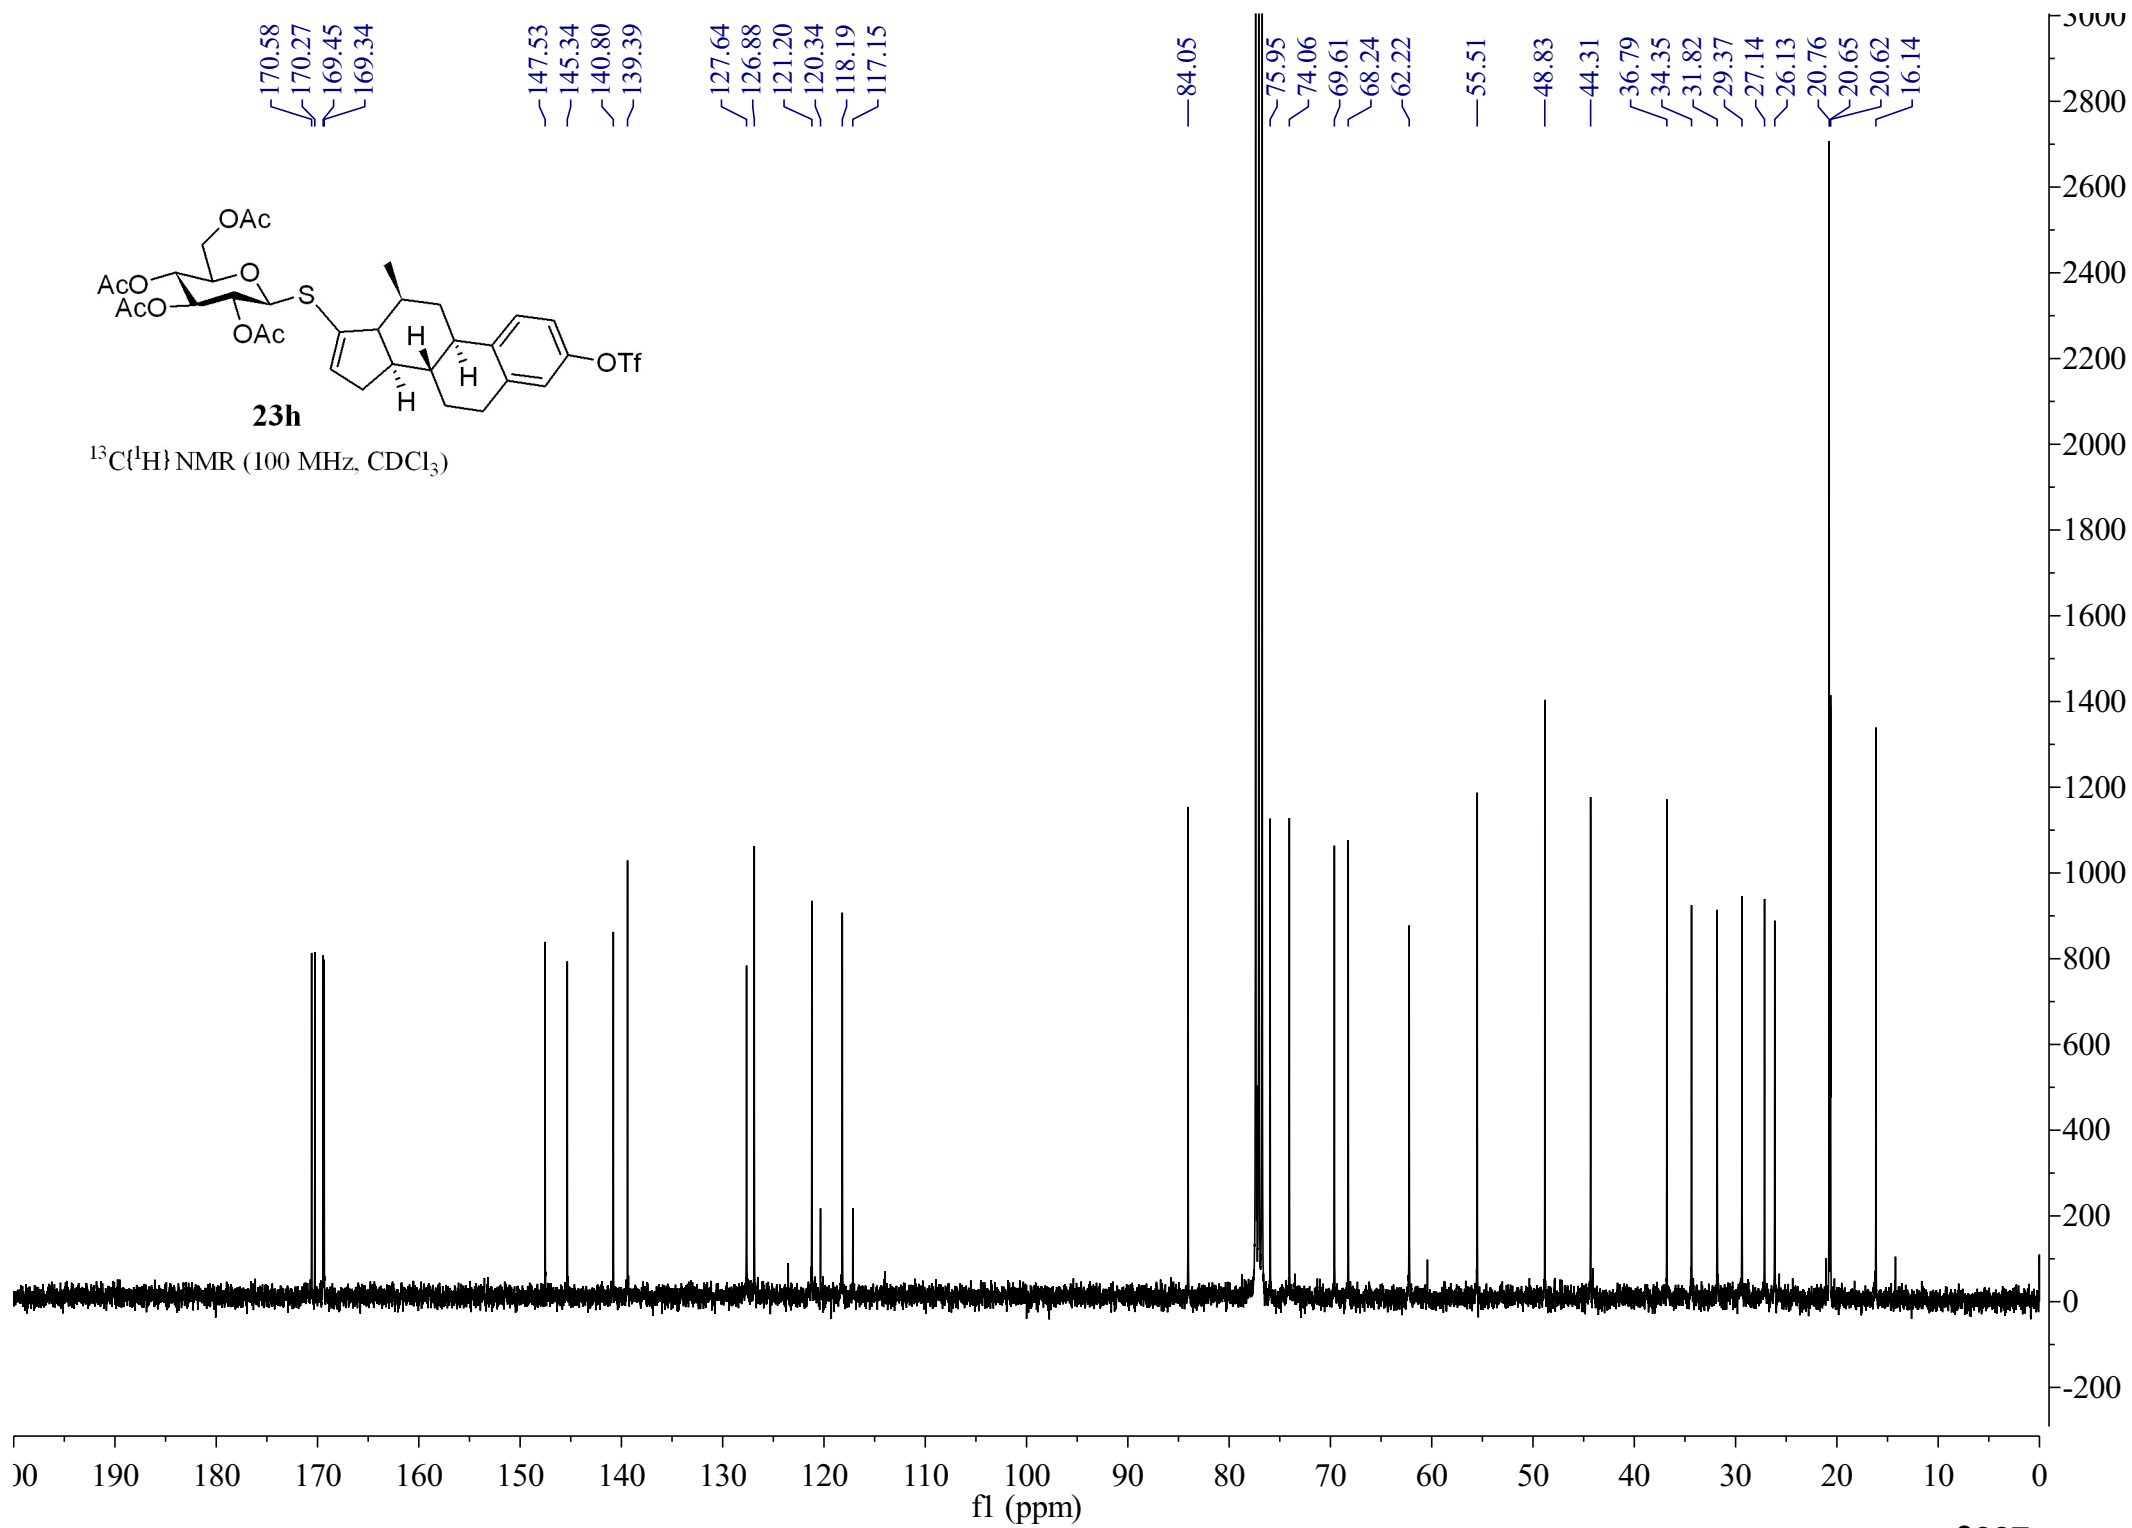

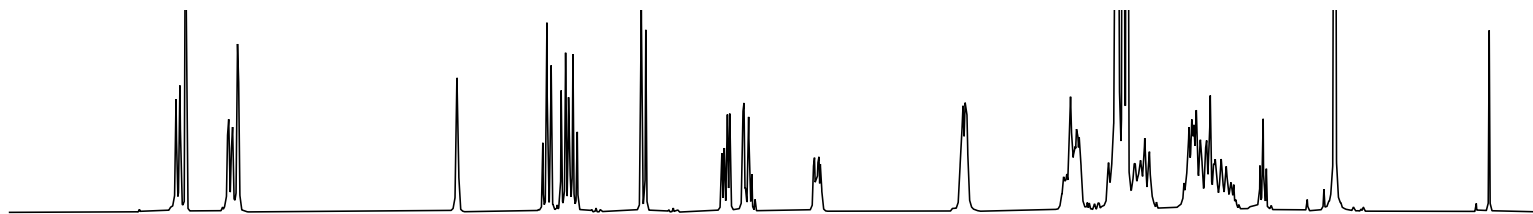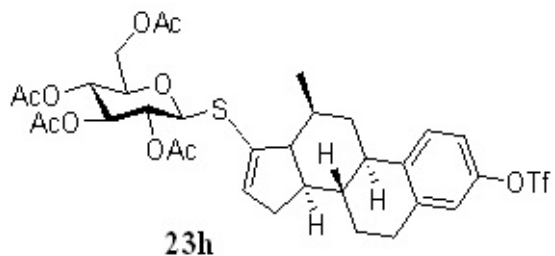

$^1\text{H}$ - $^1\text{H}$  COSY (400 MHz,  $\text{CDCl}_3$ )

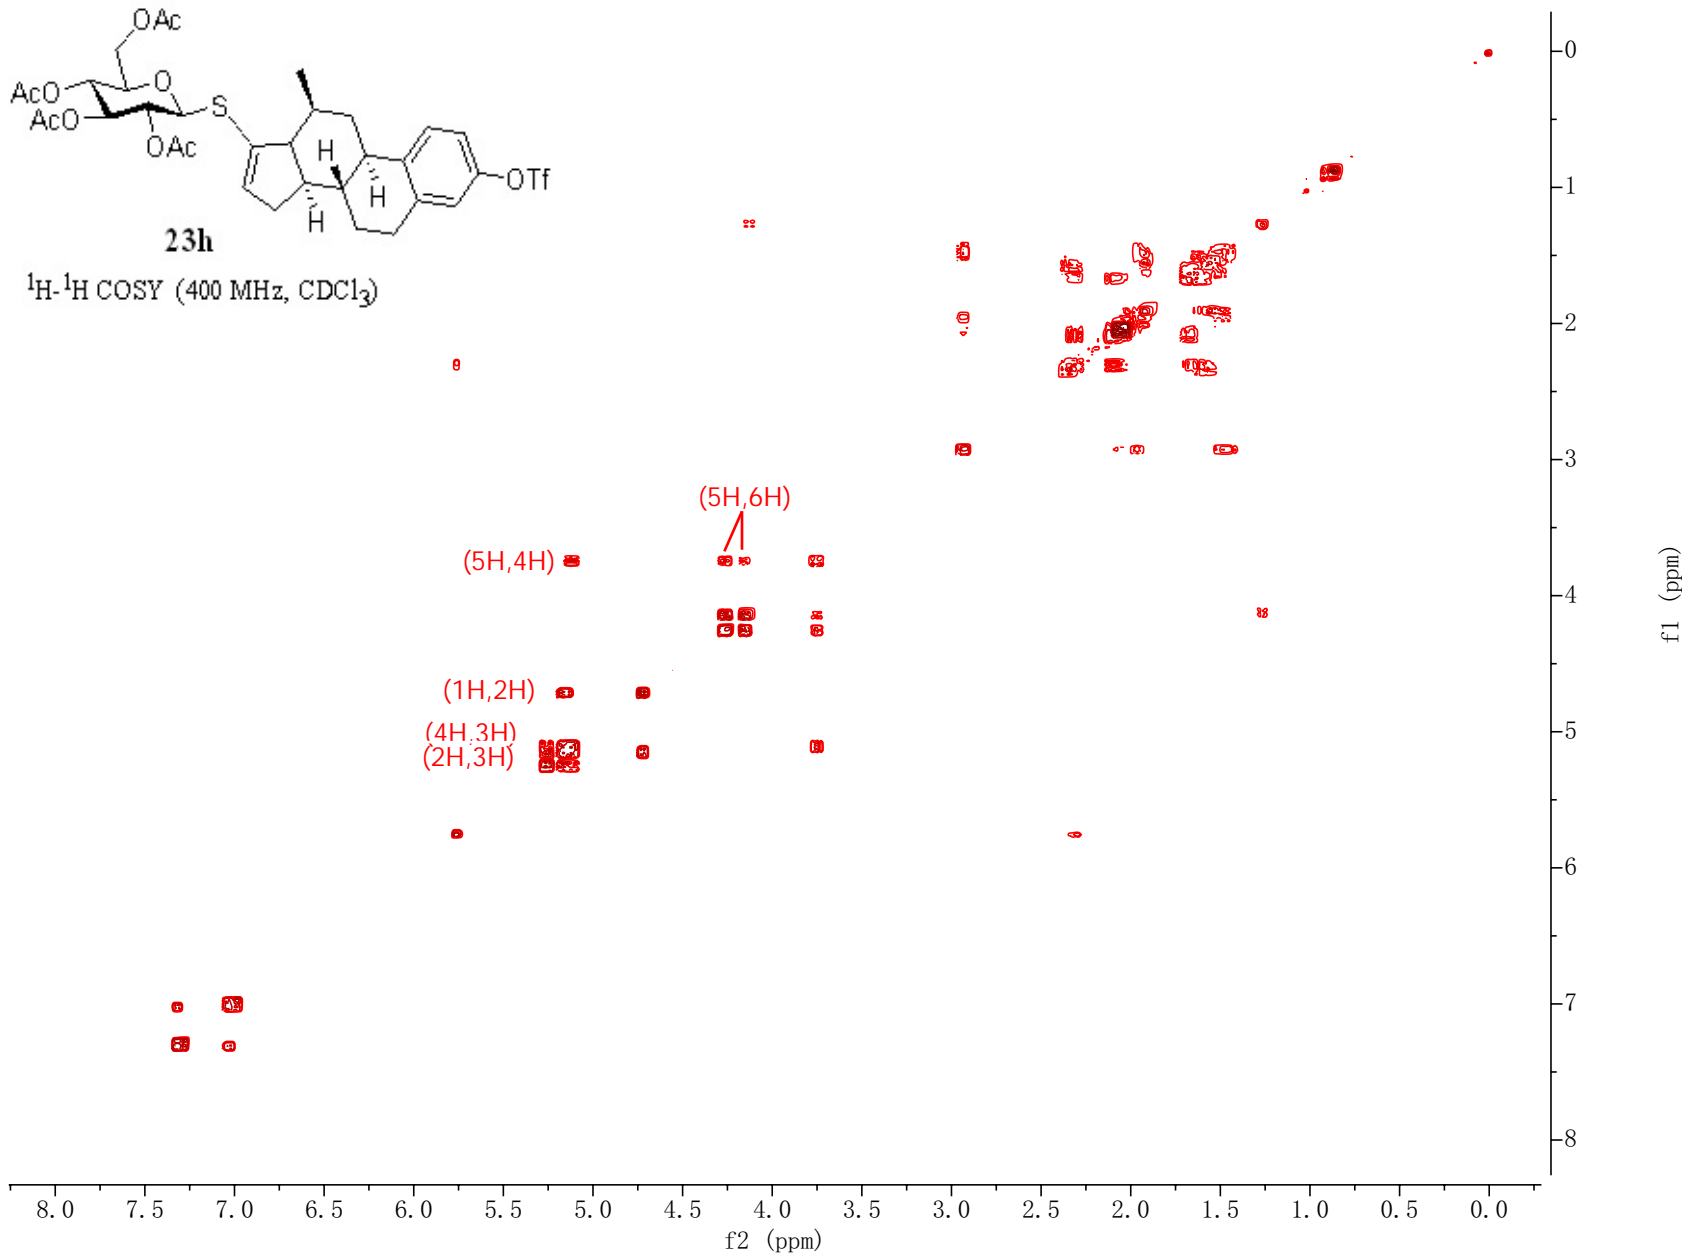

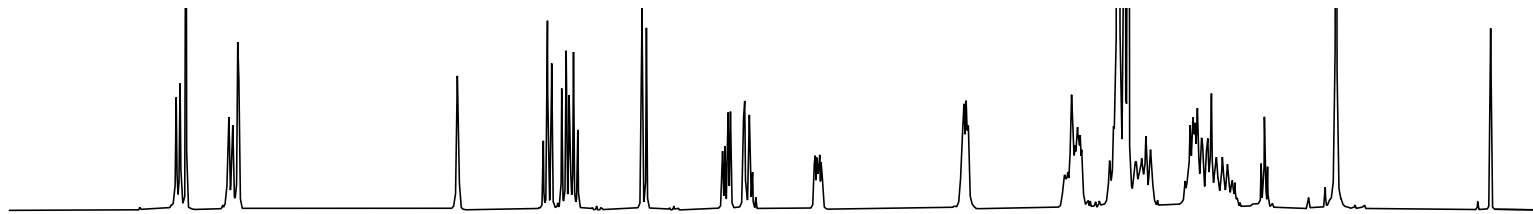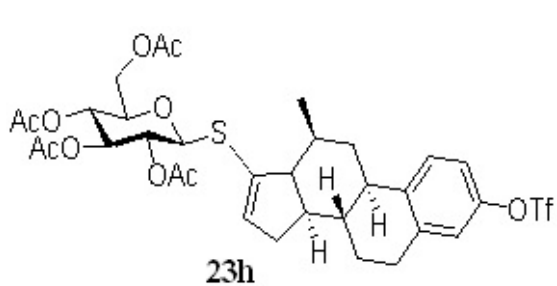

HSQC (400 MHz, CDCl<sub>3</sub>)

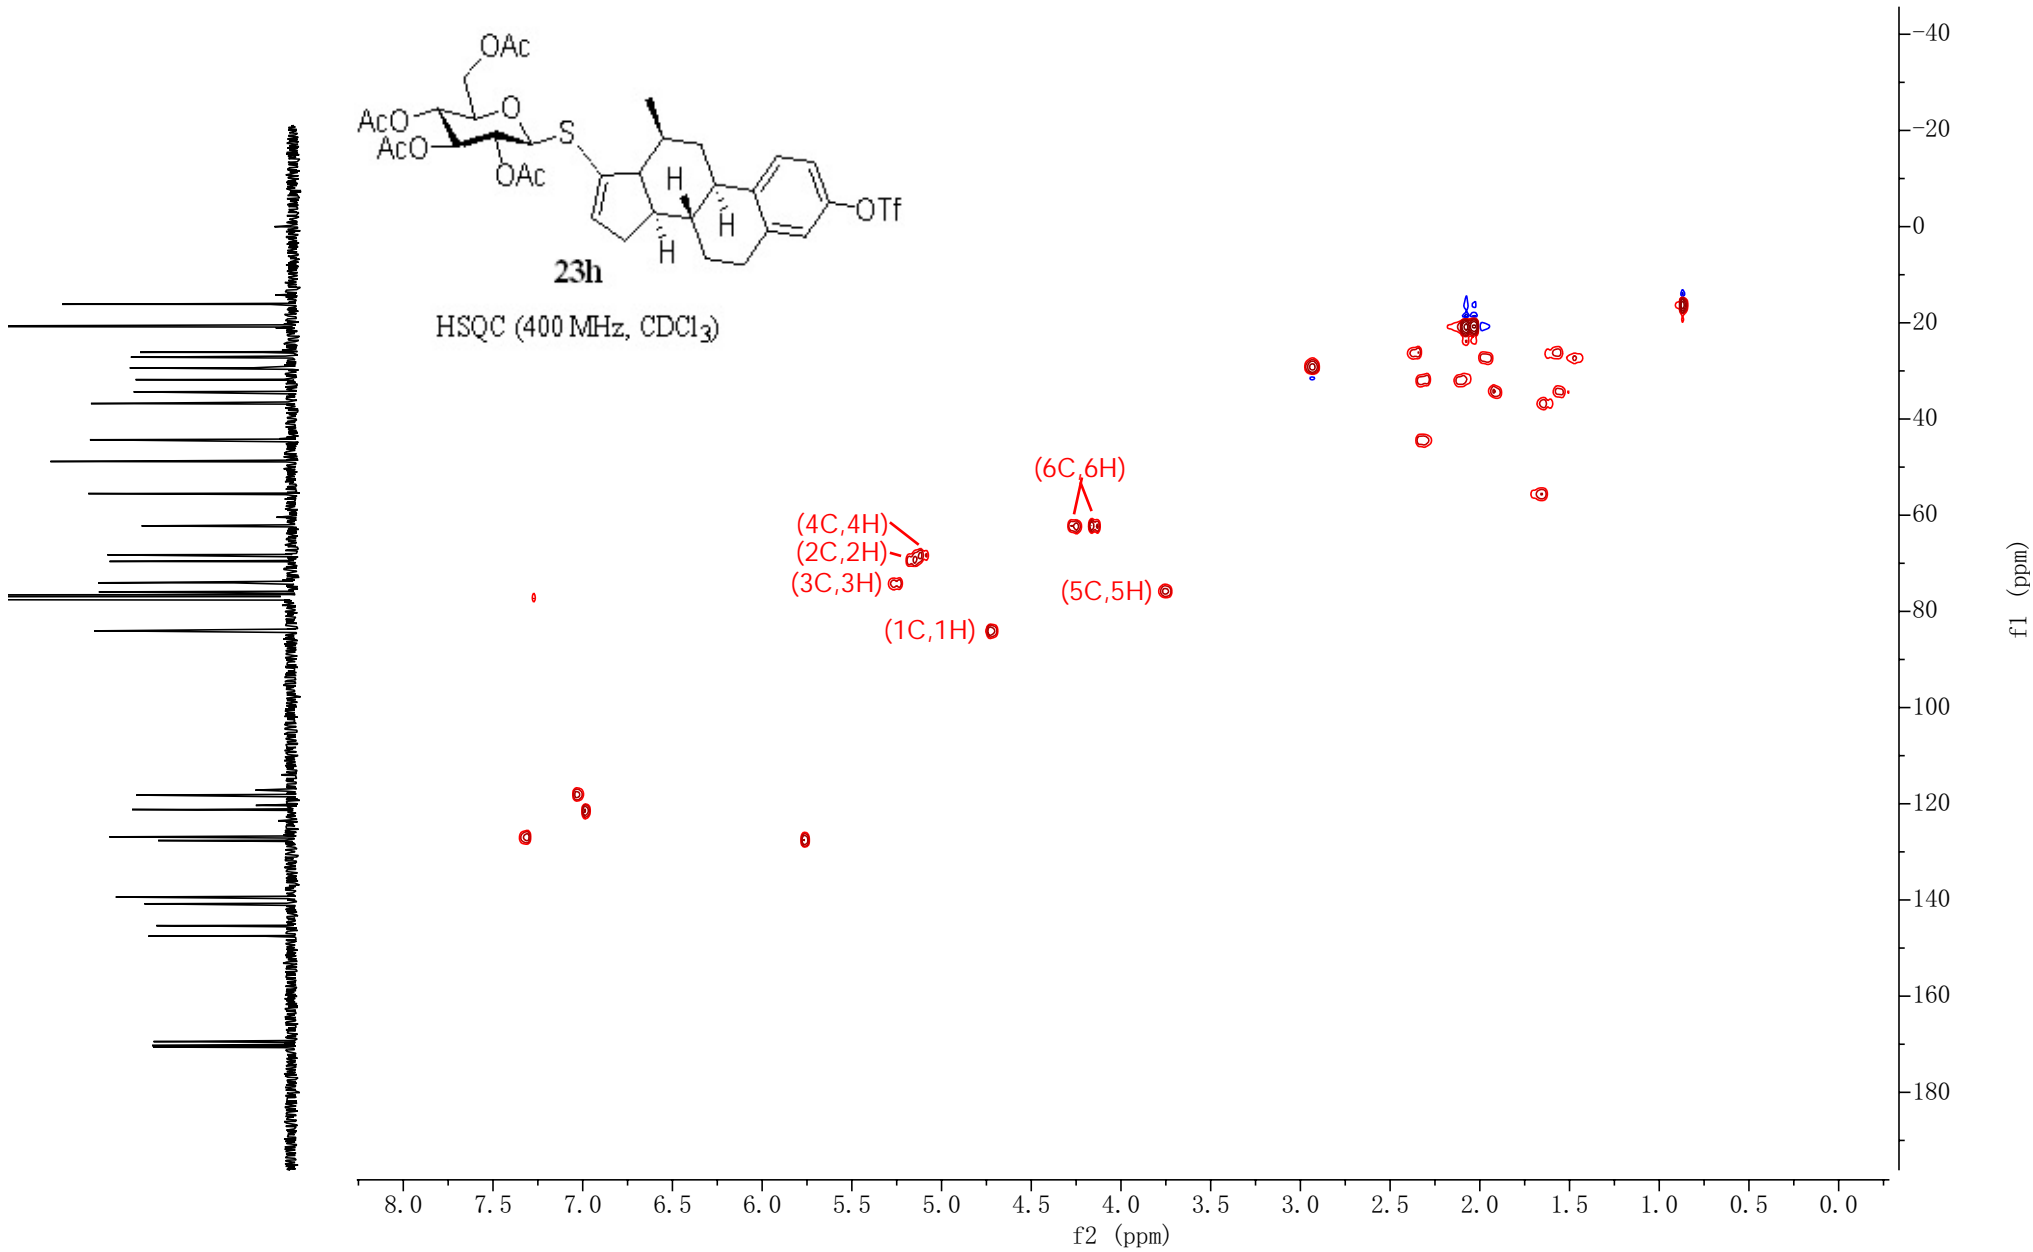

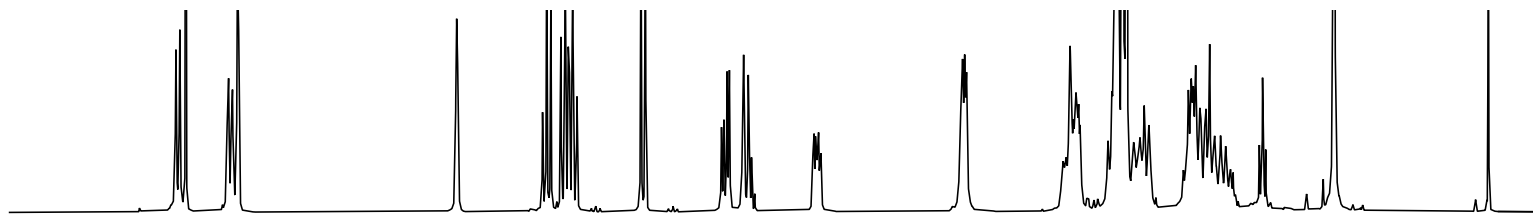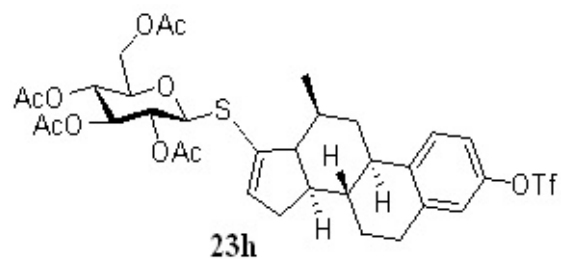

HMBC (400 MHz, CDCl<sub>3</sub>)

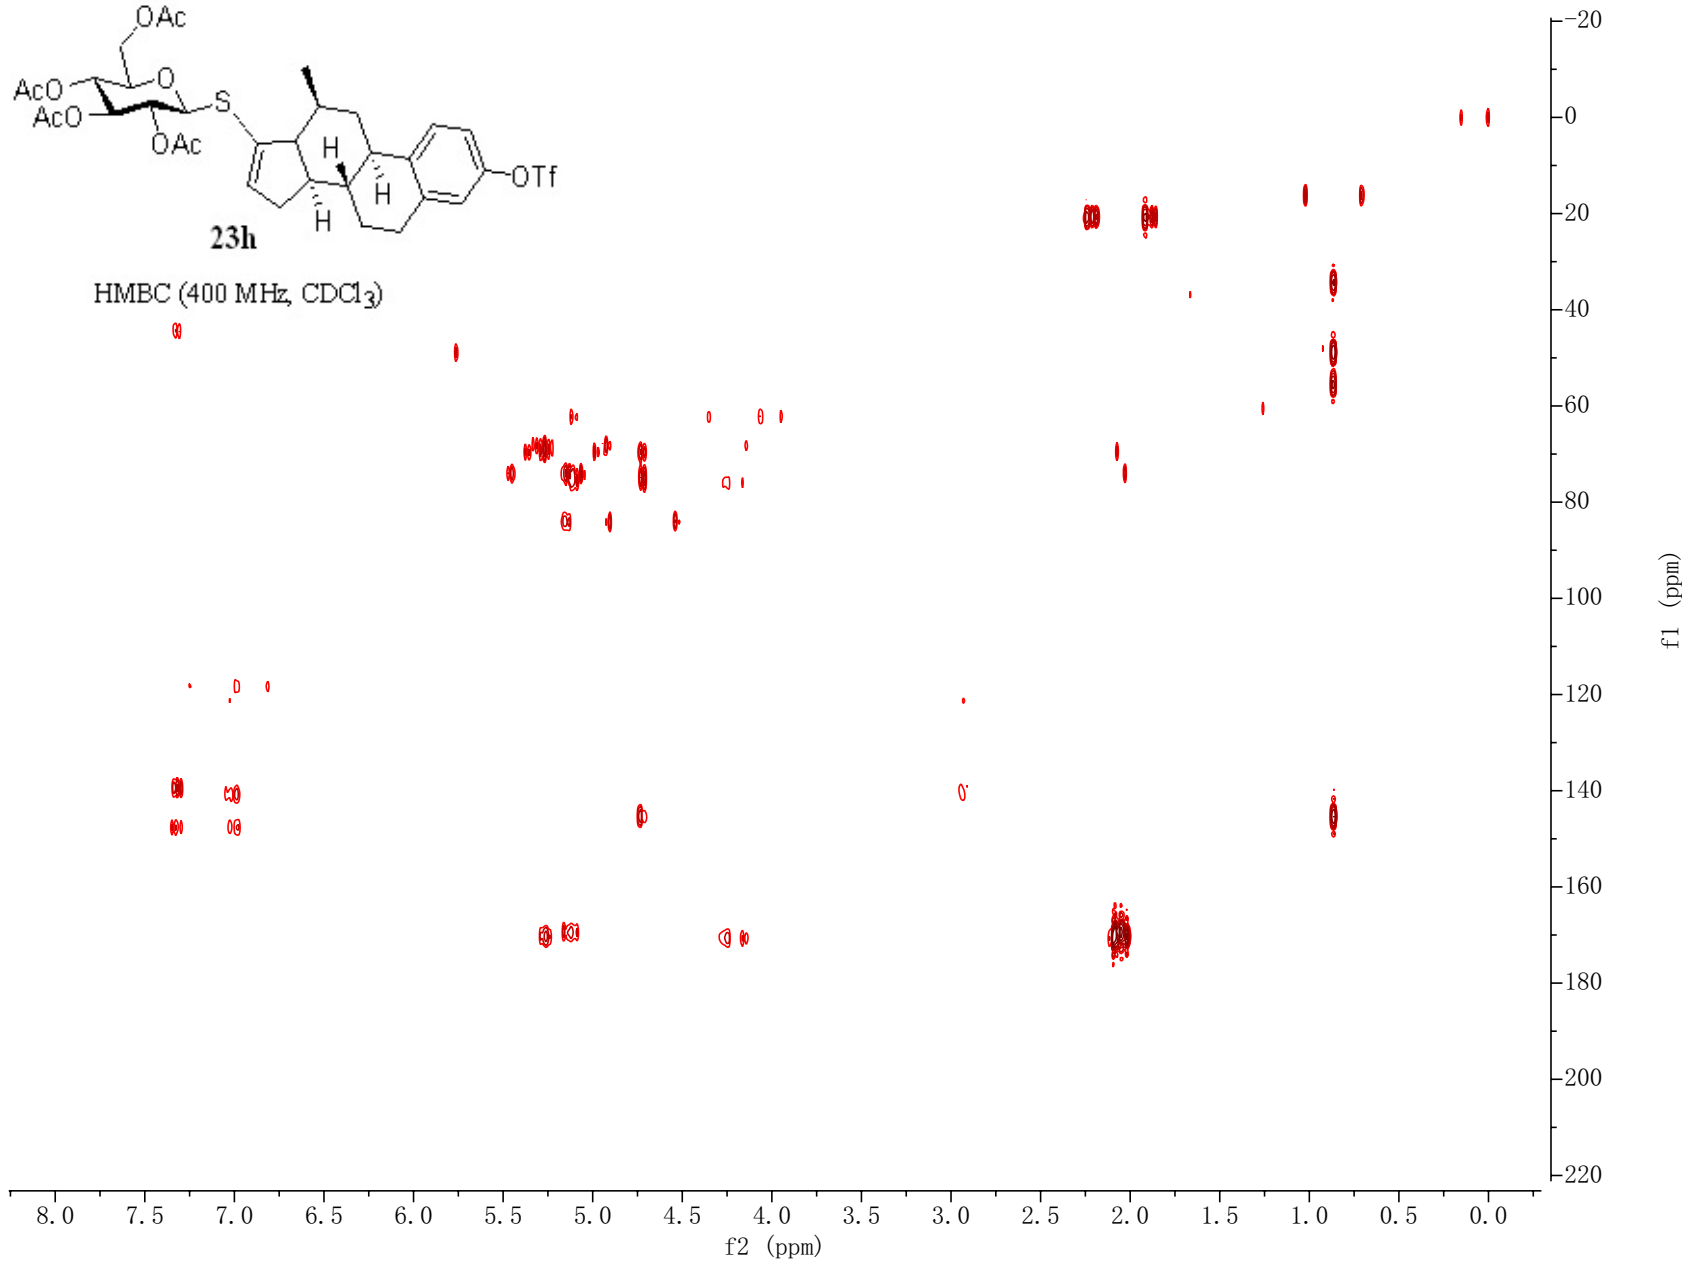

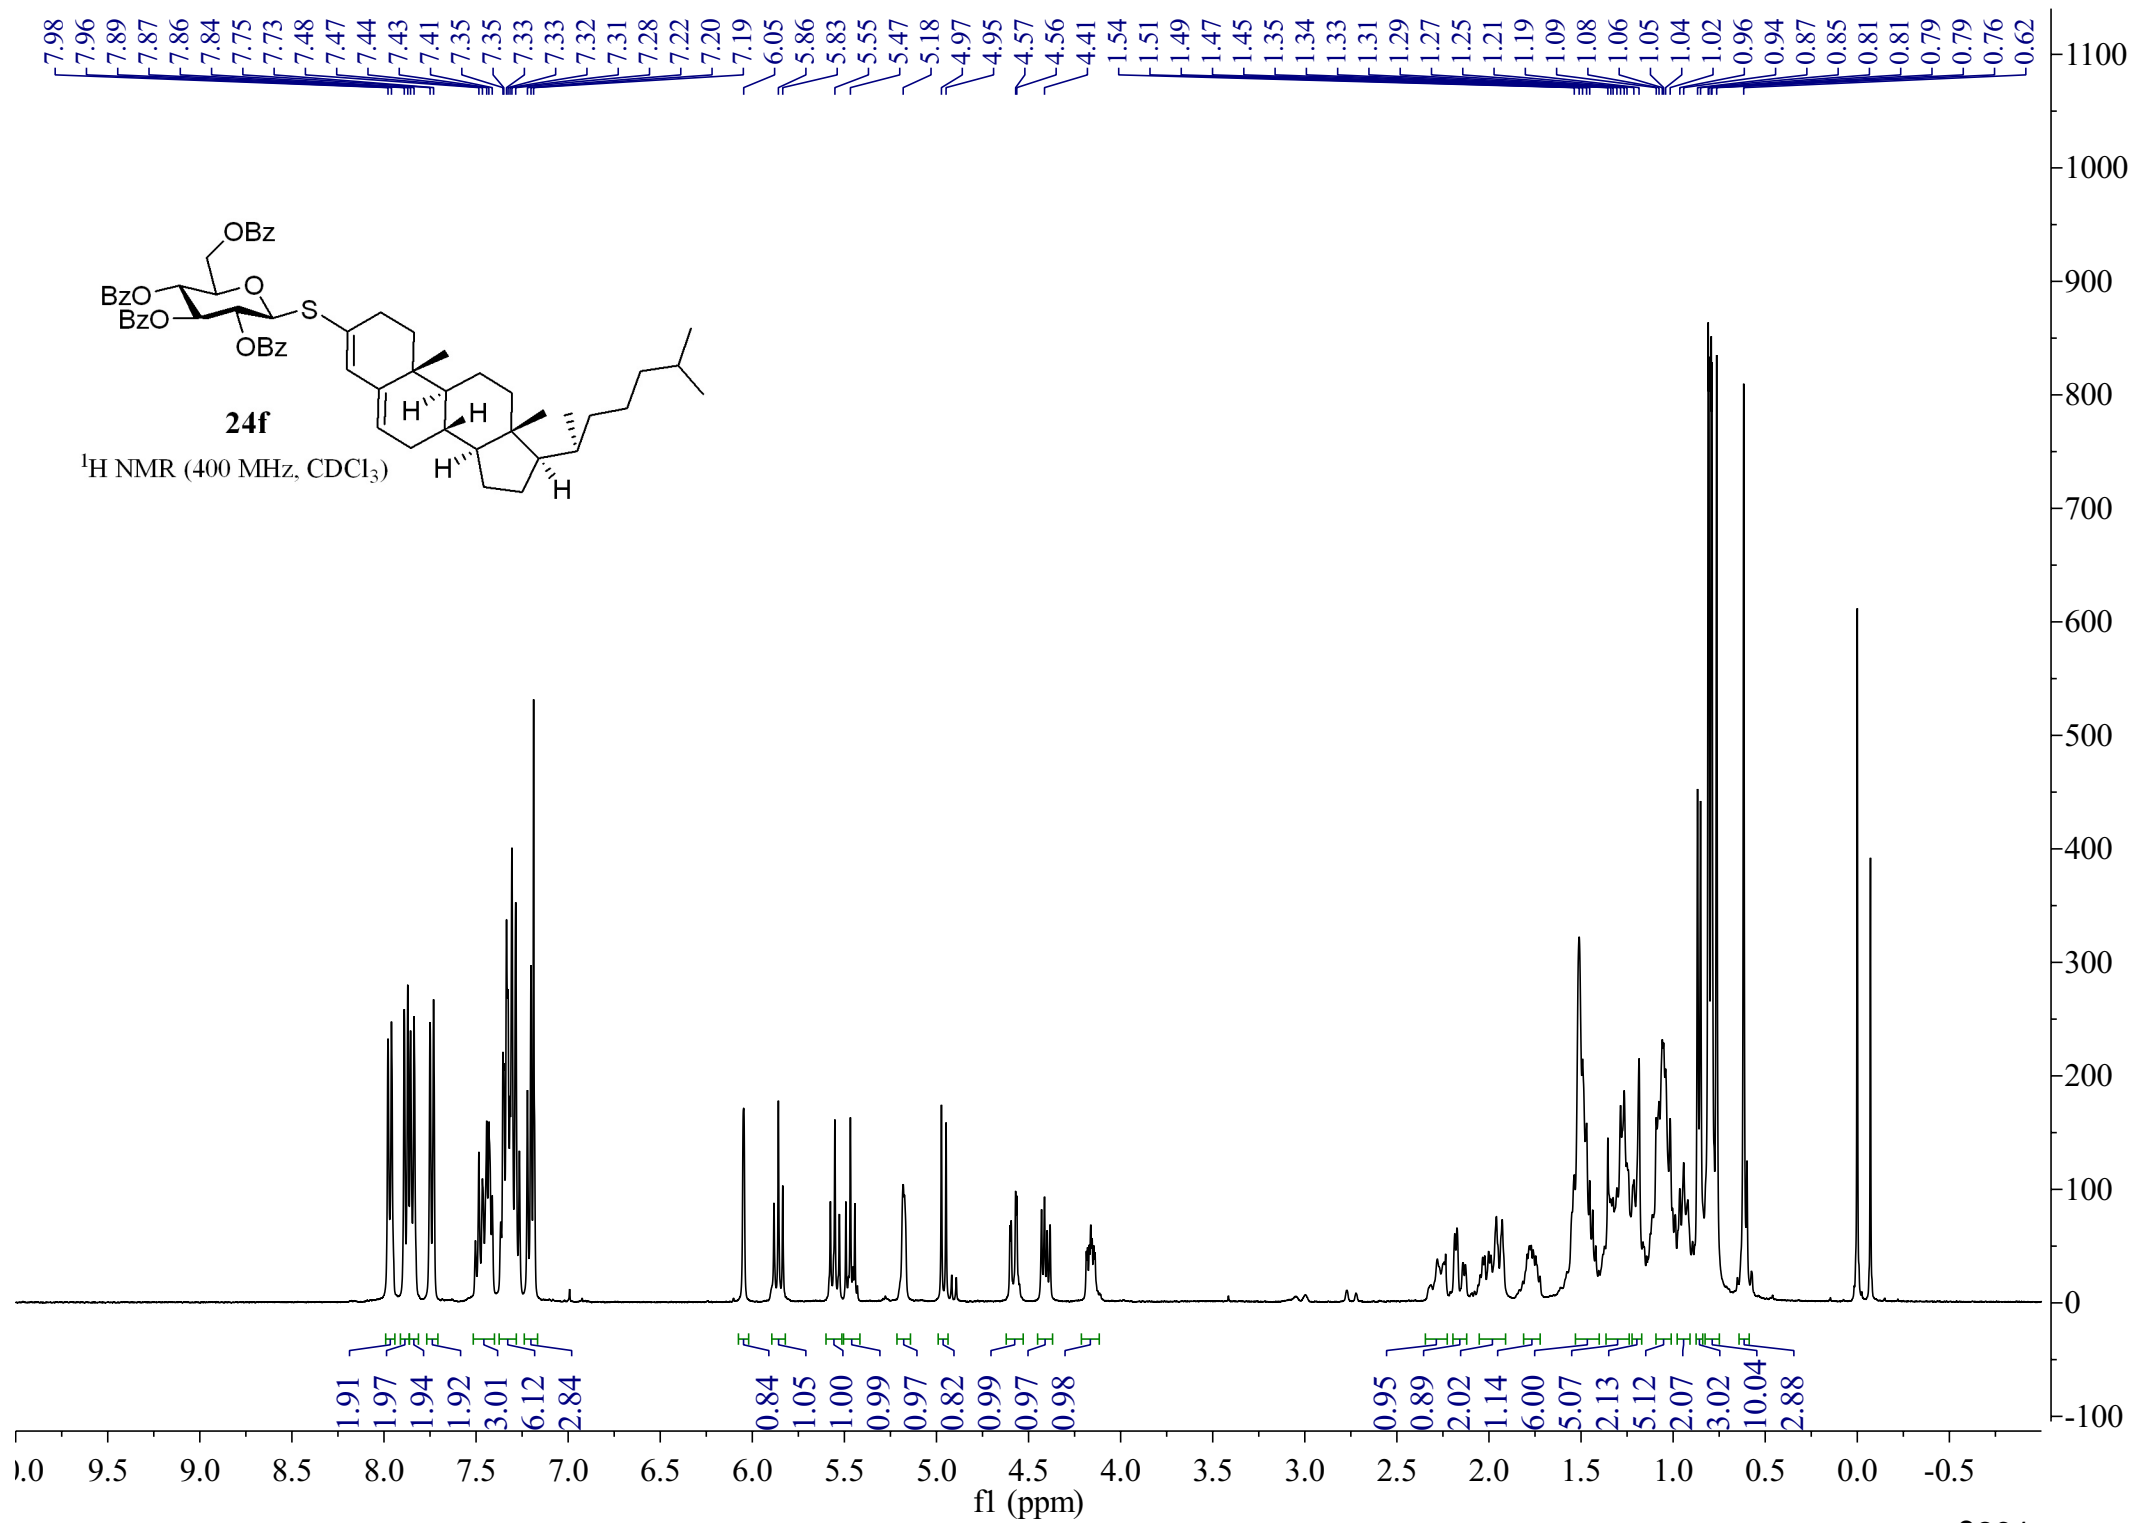

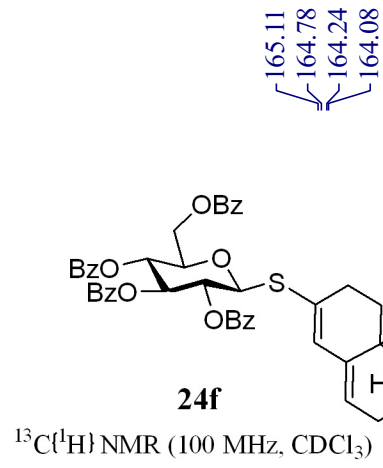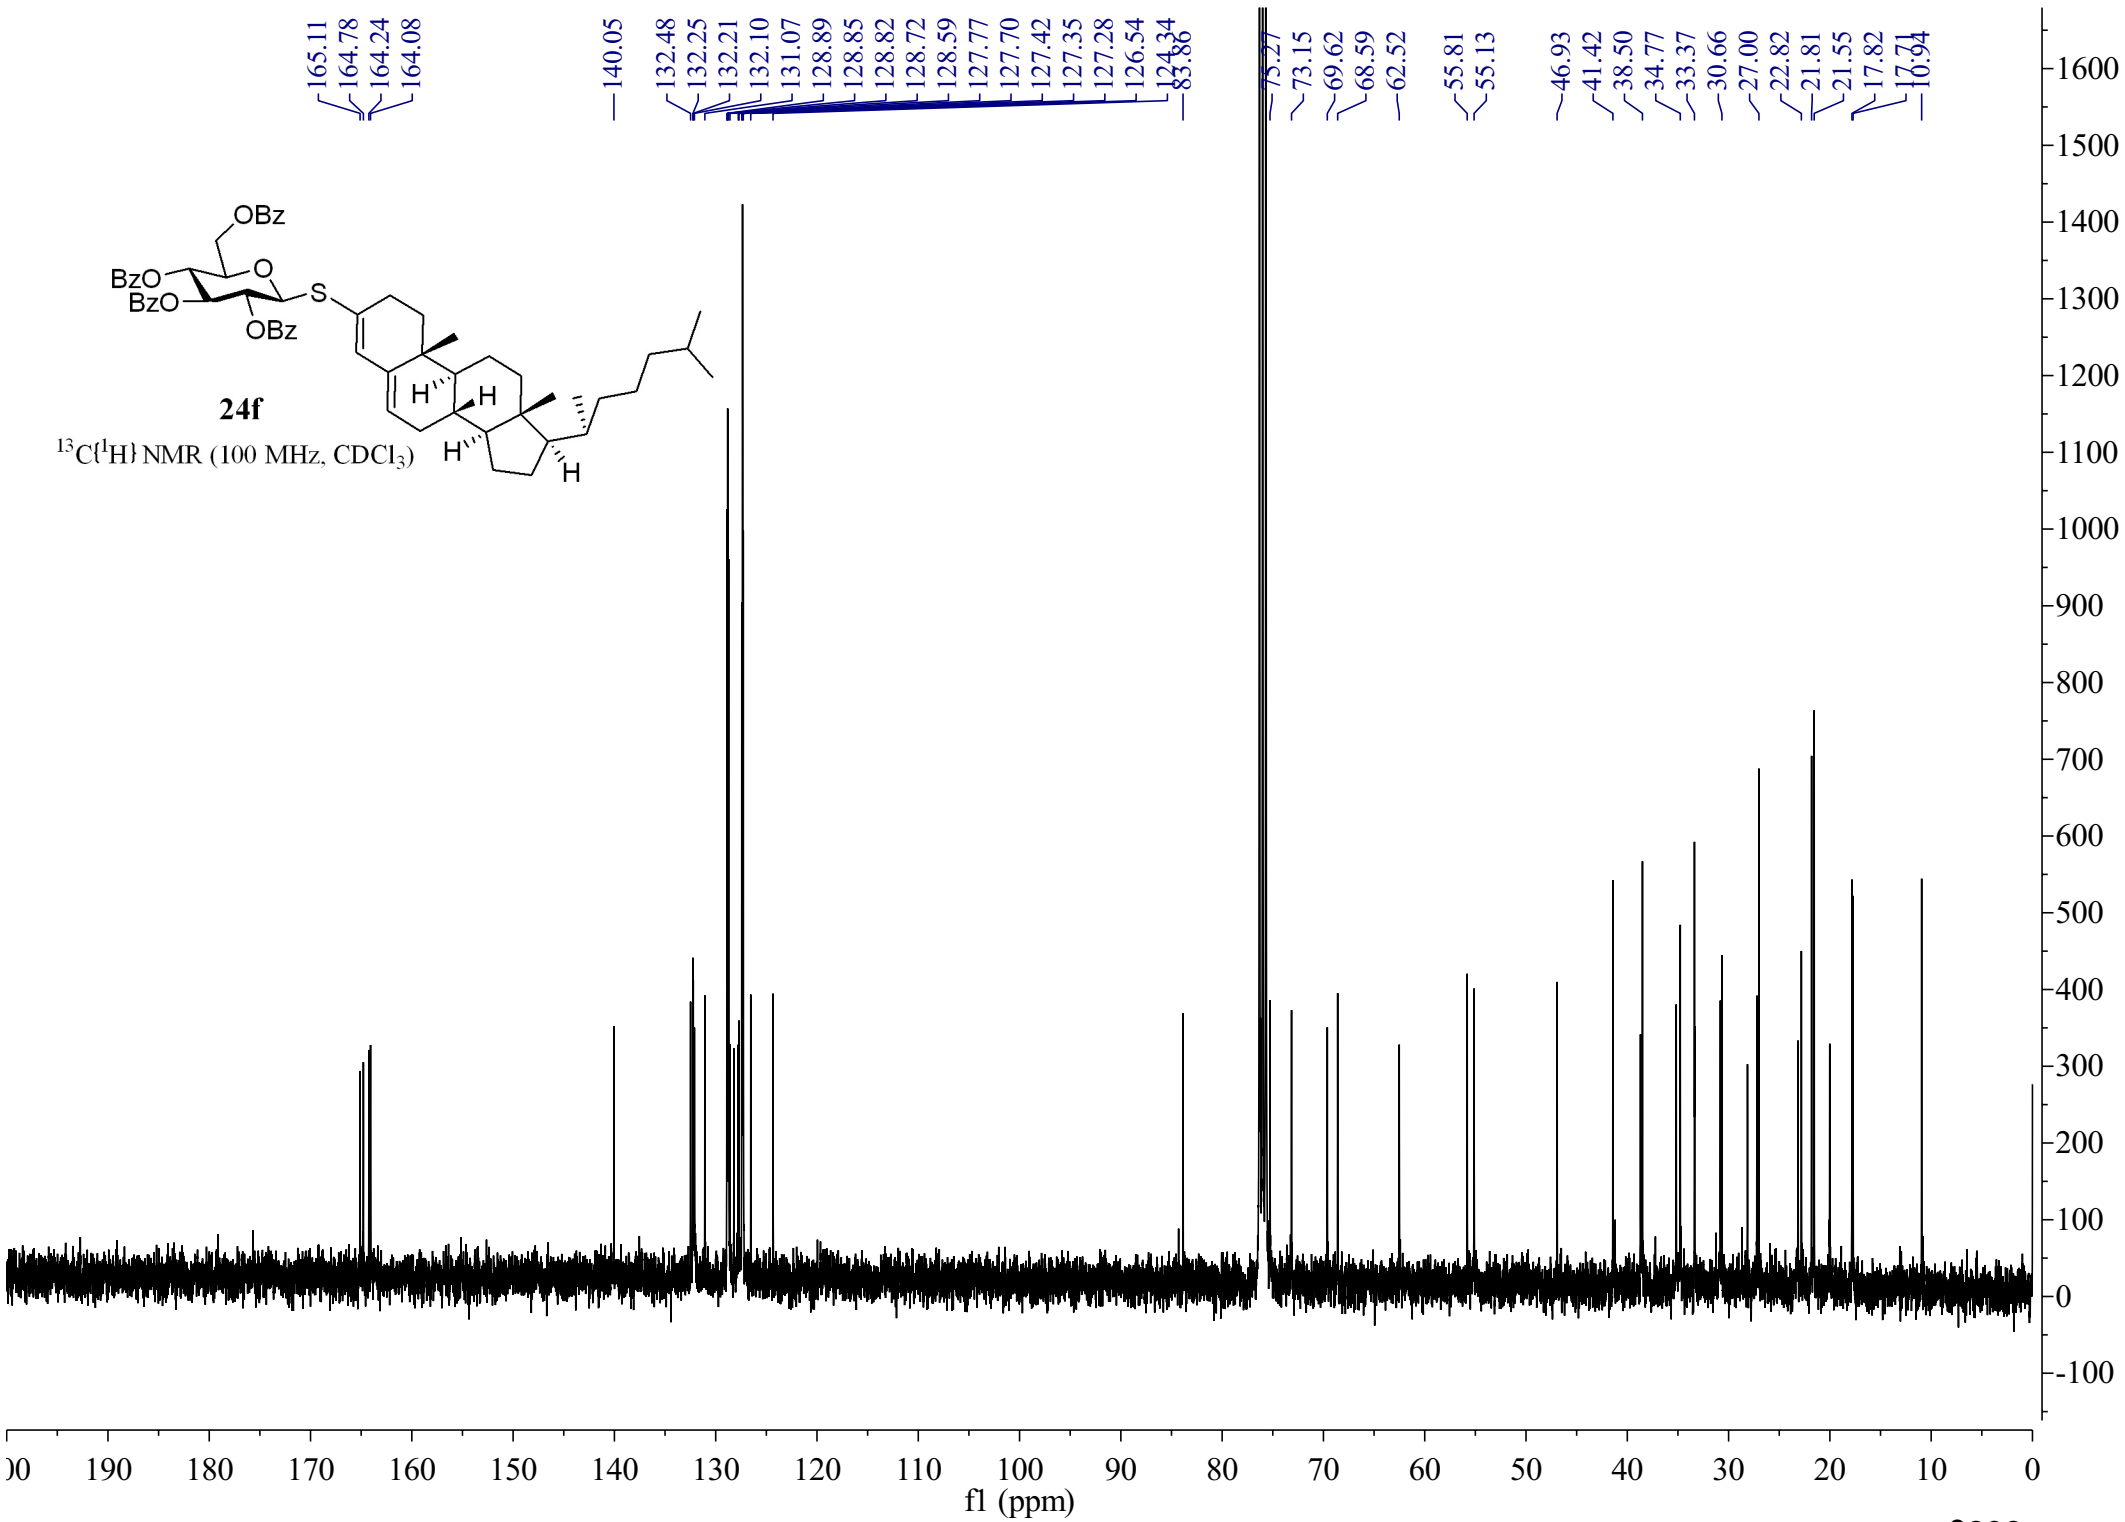

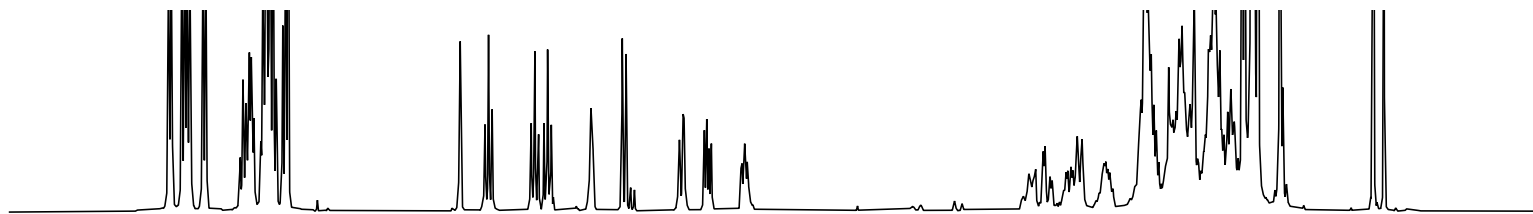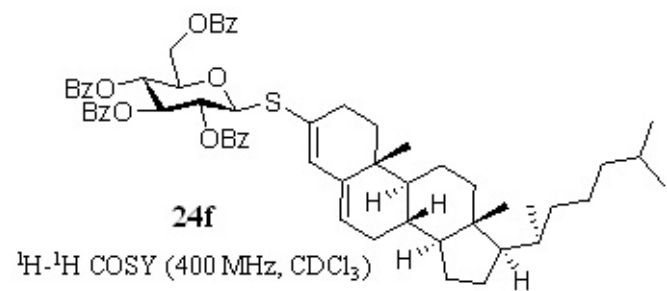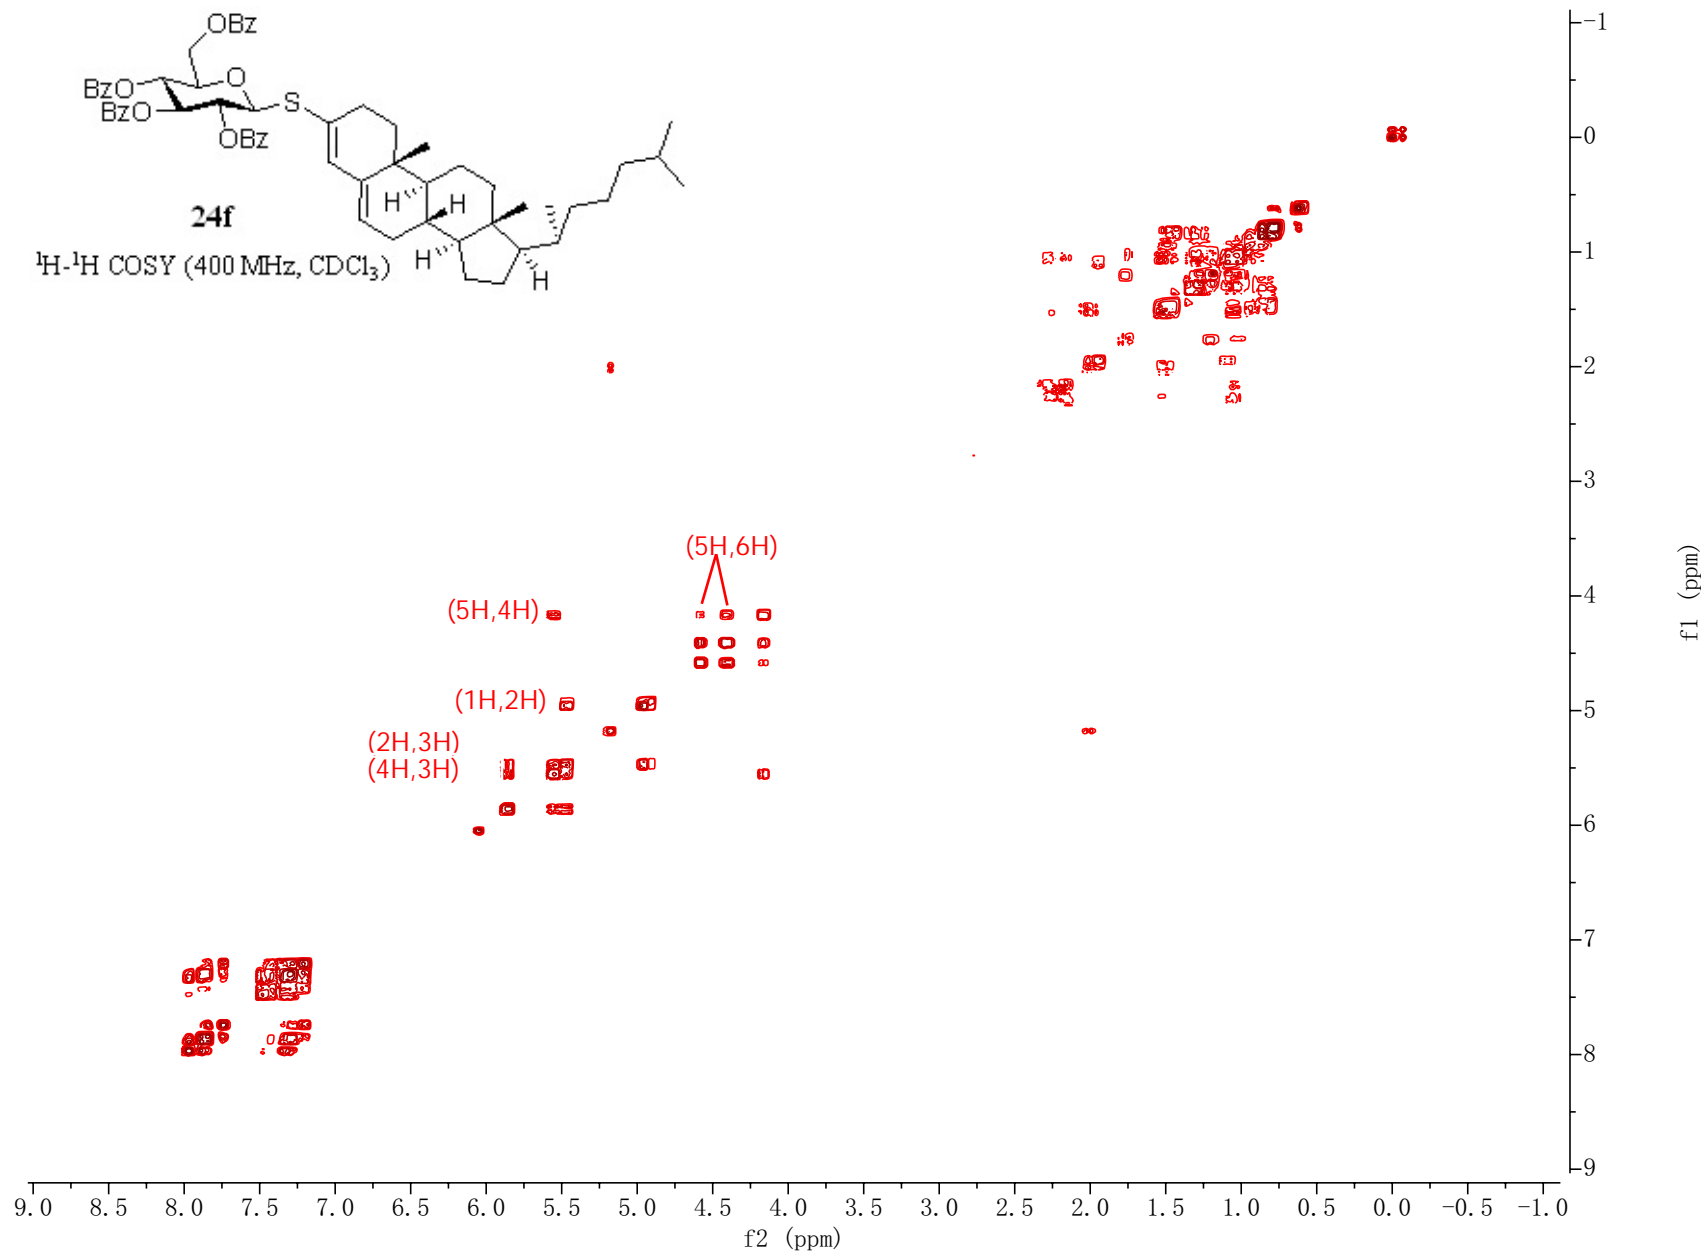



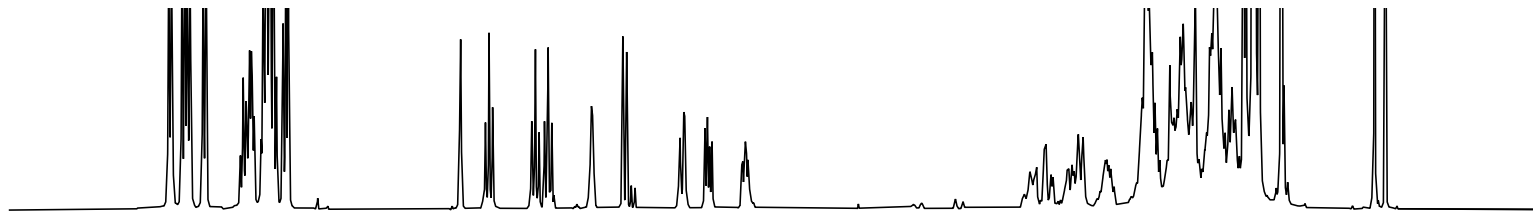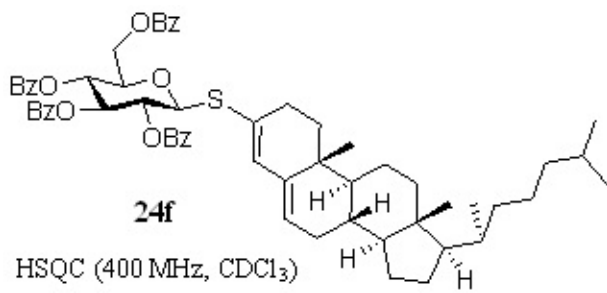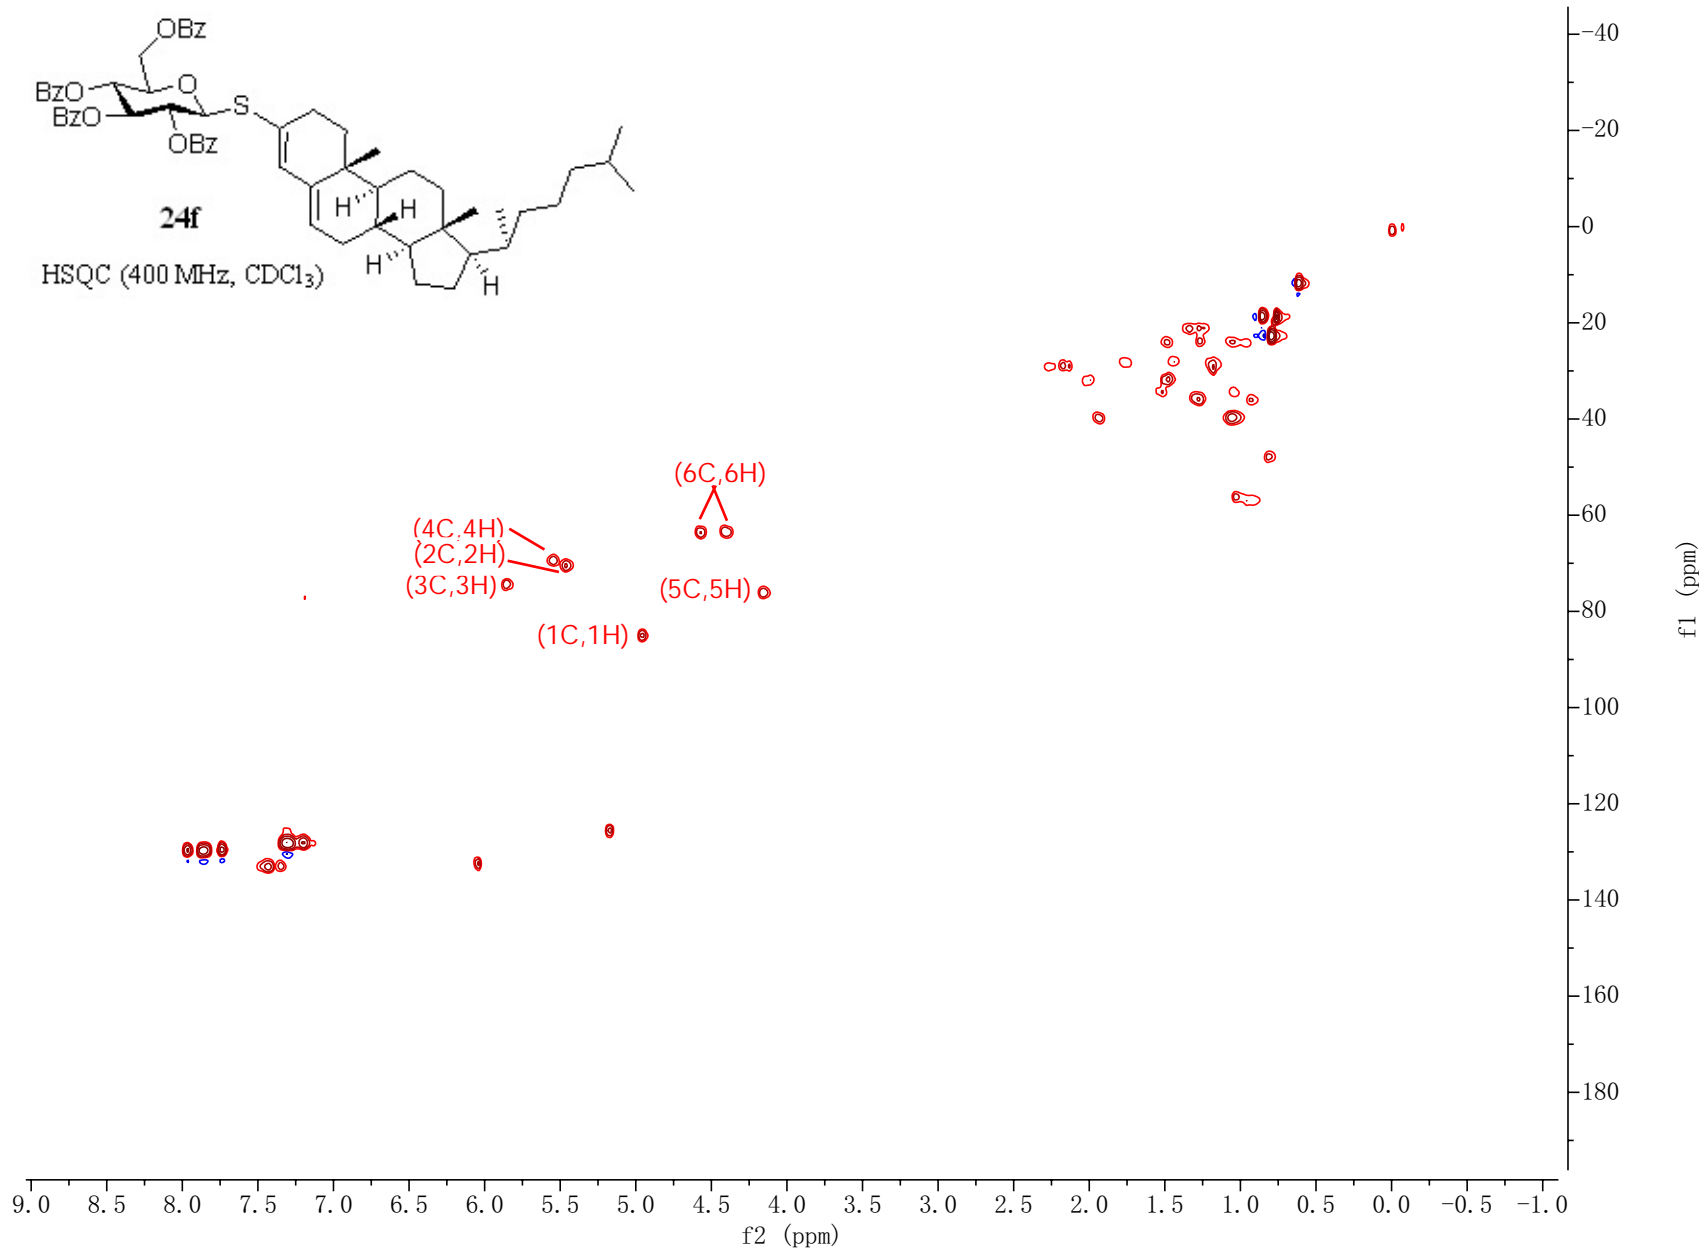

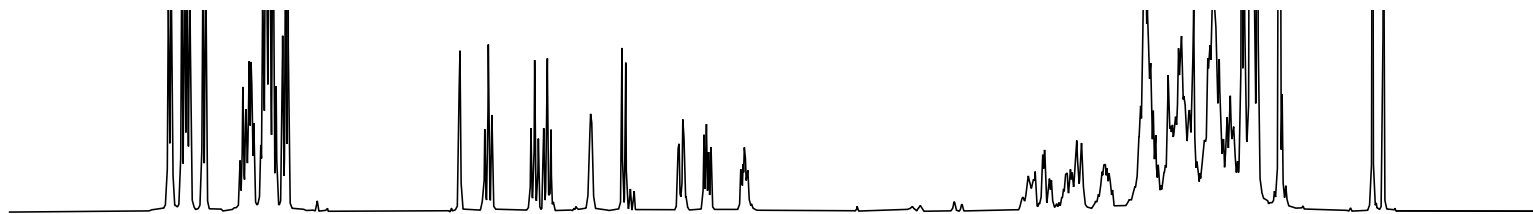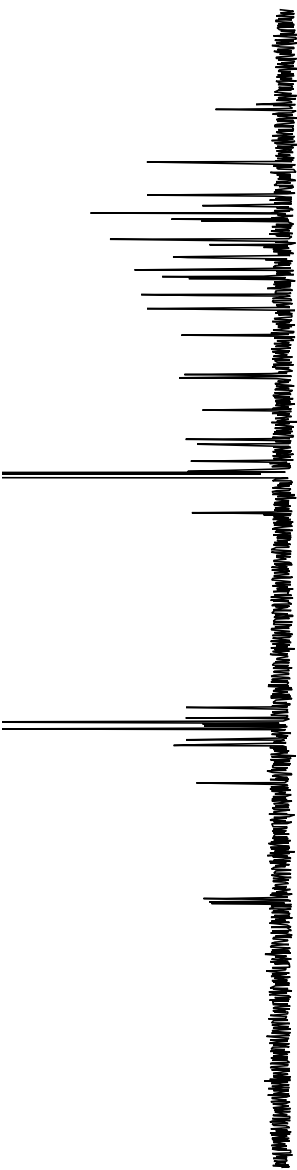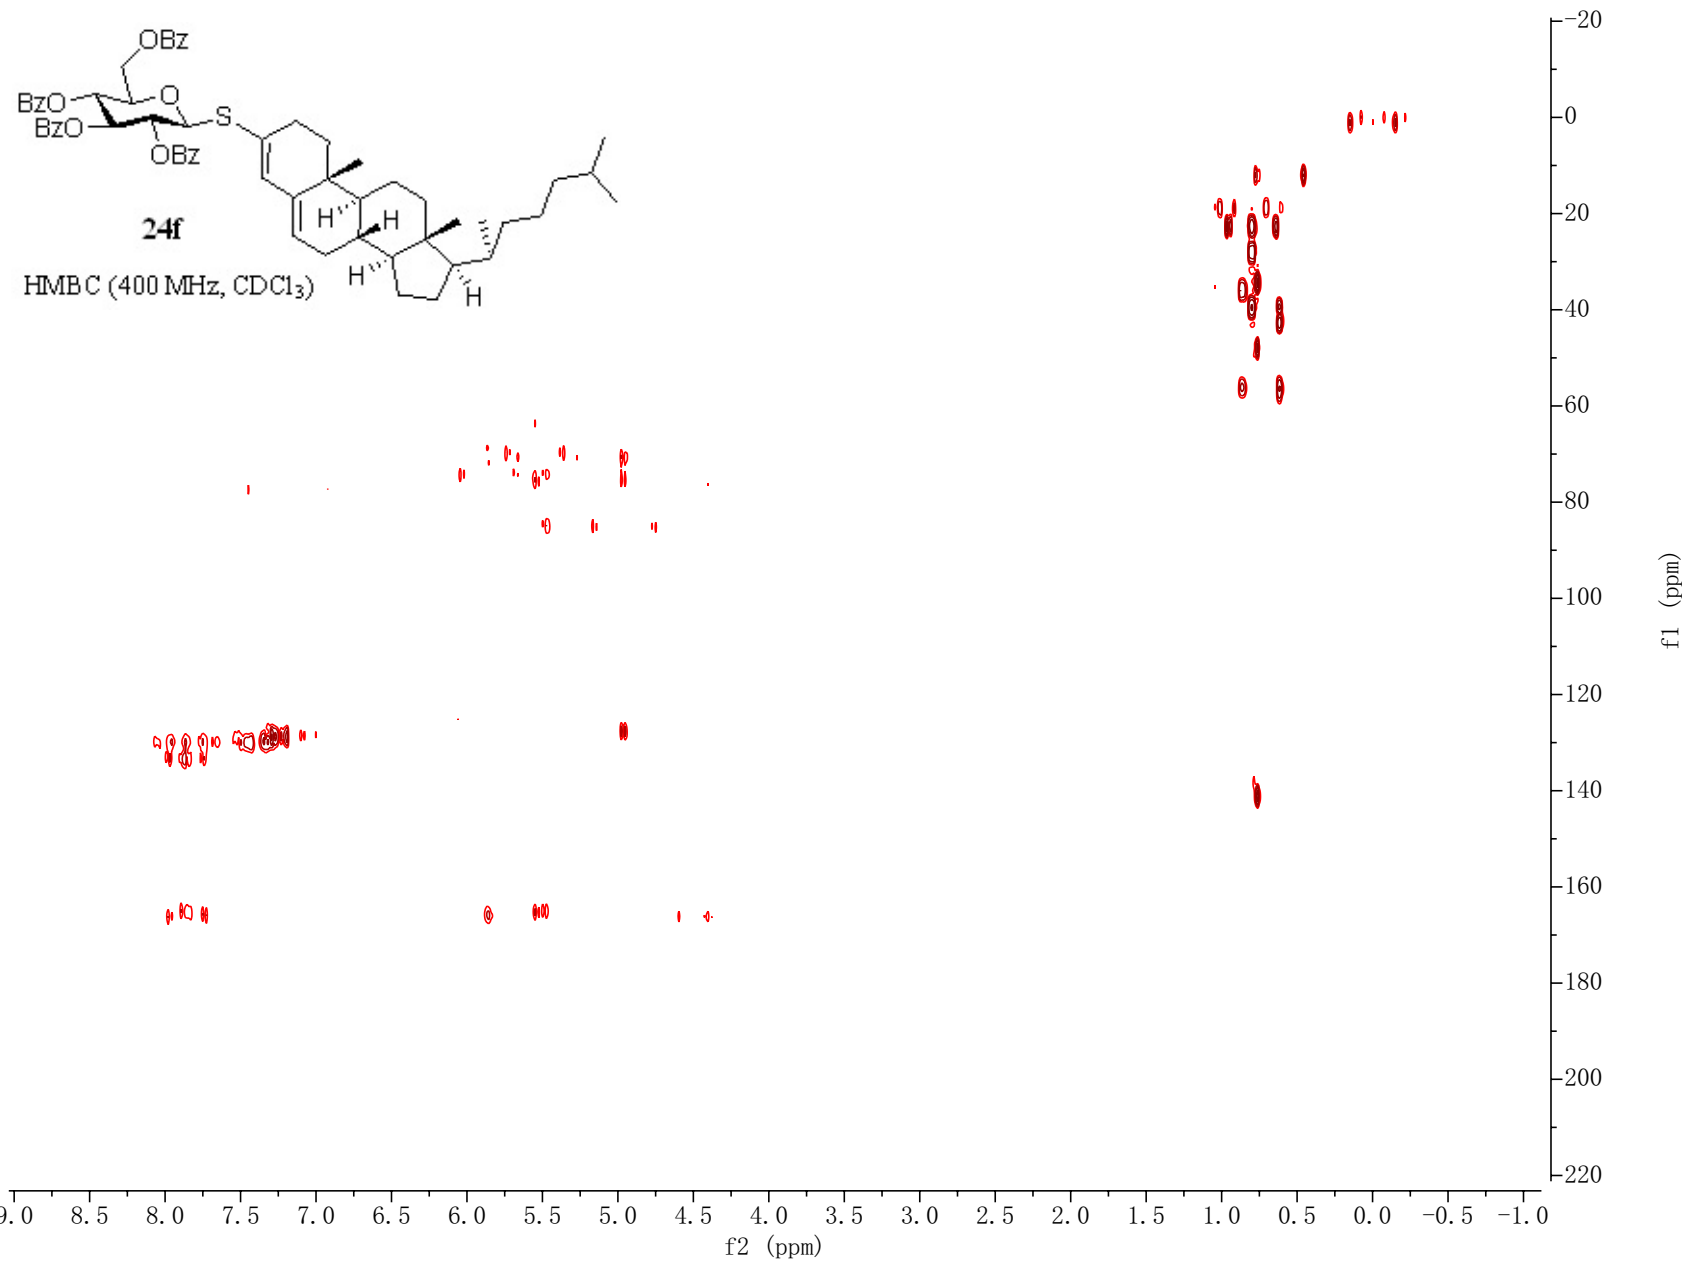

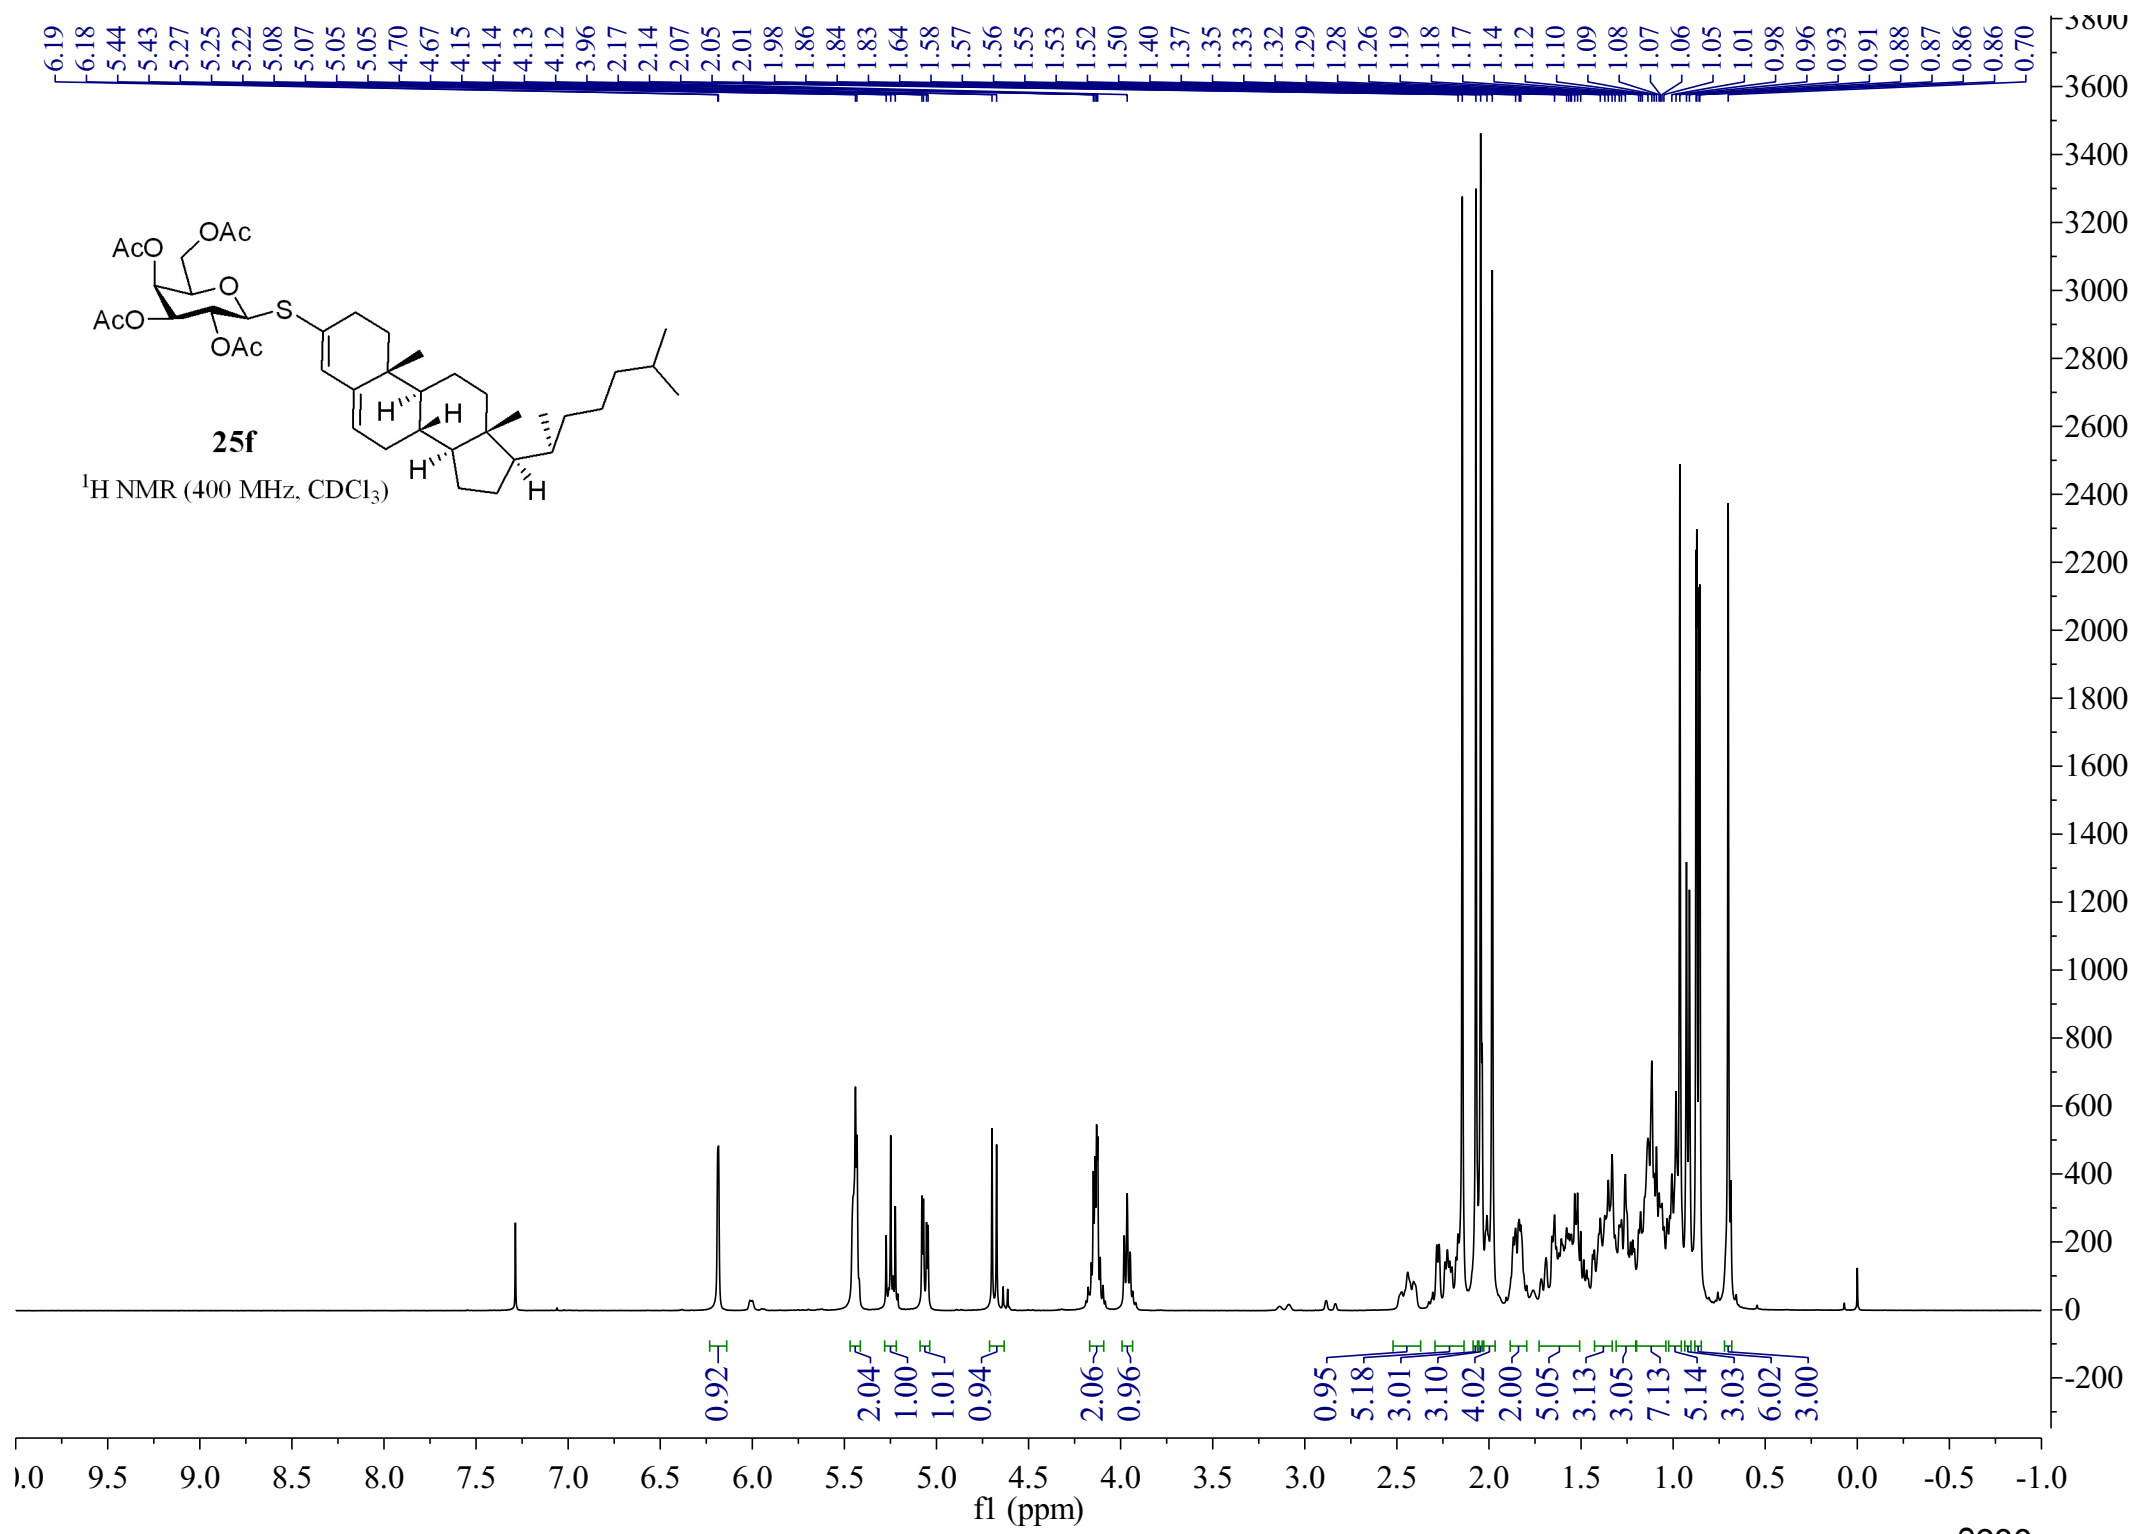

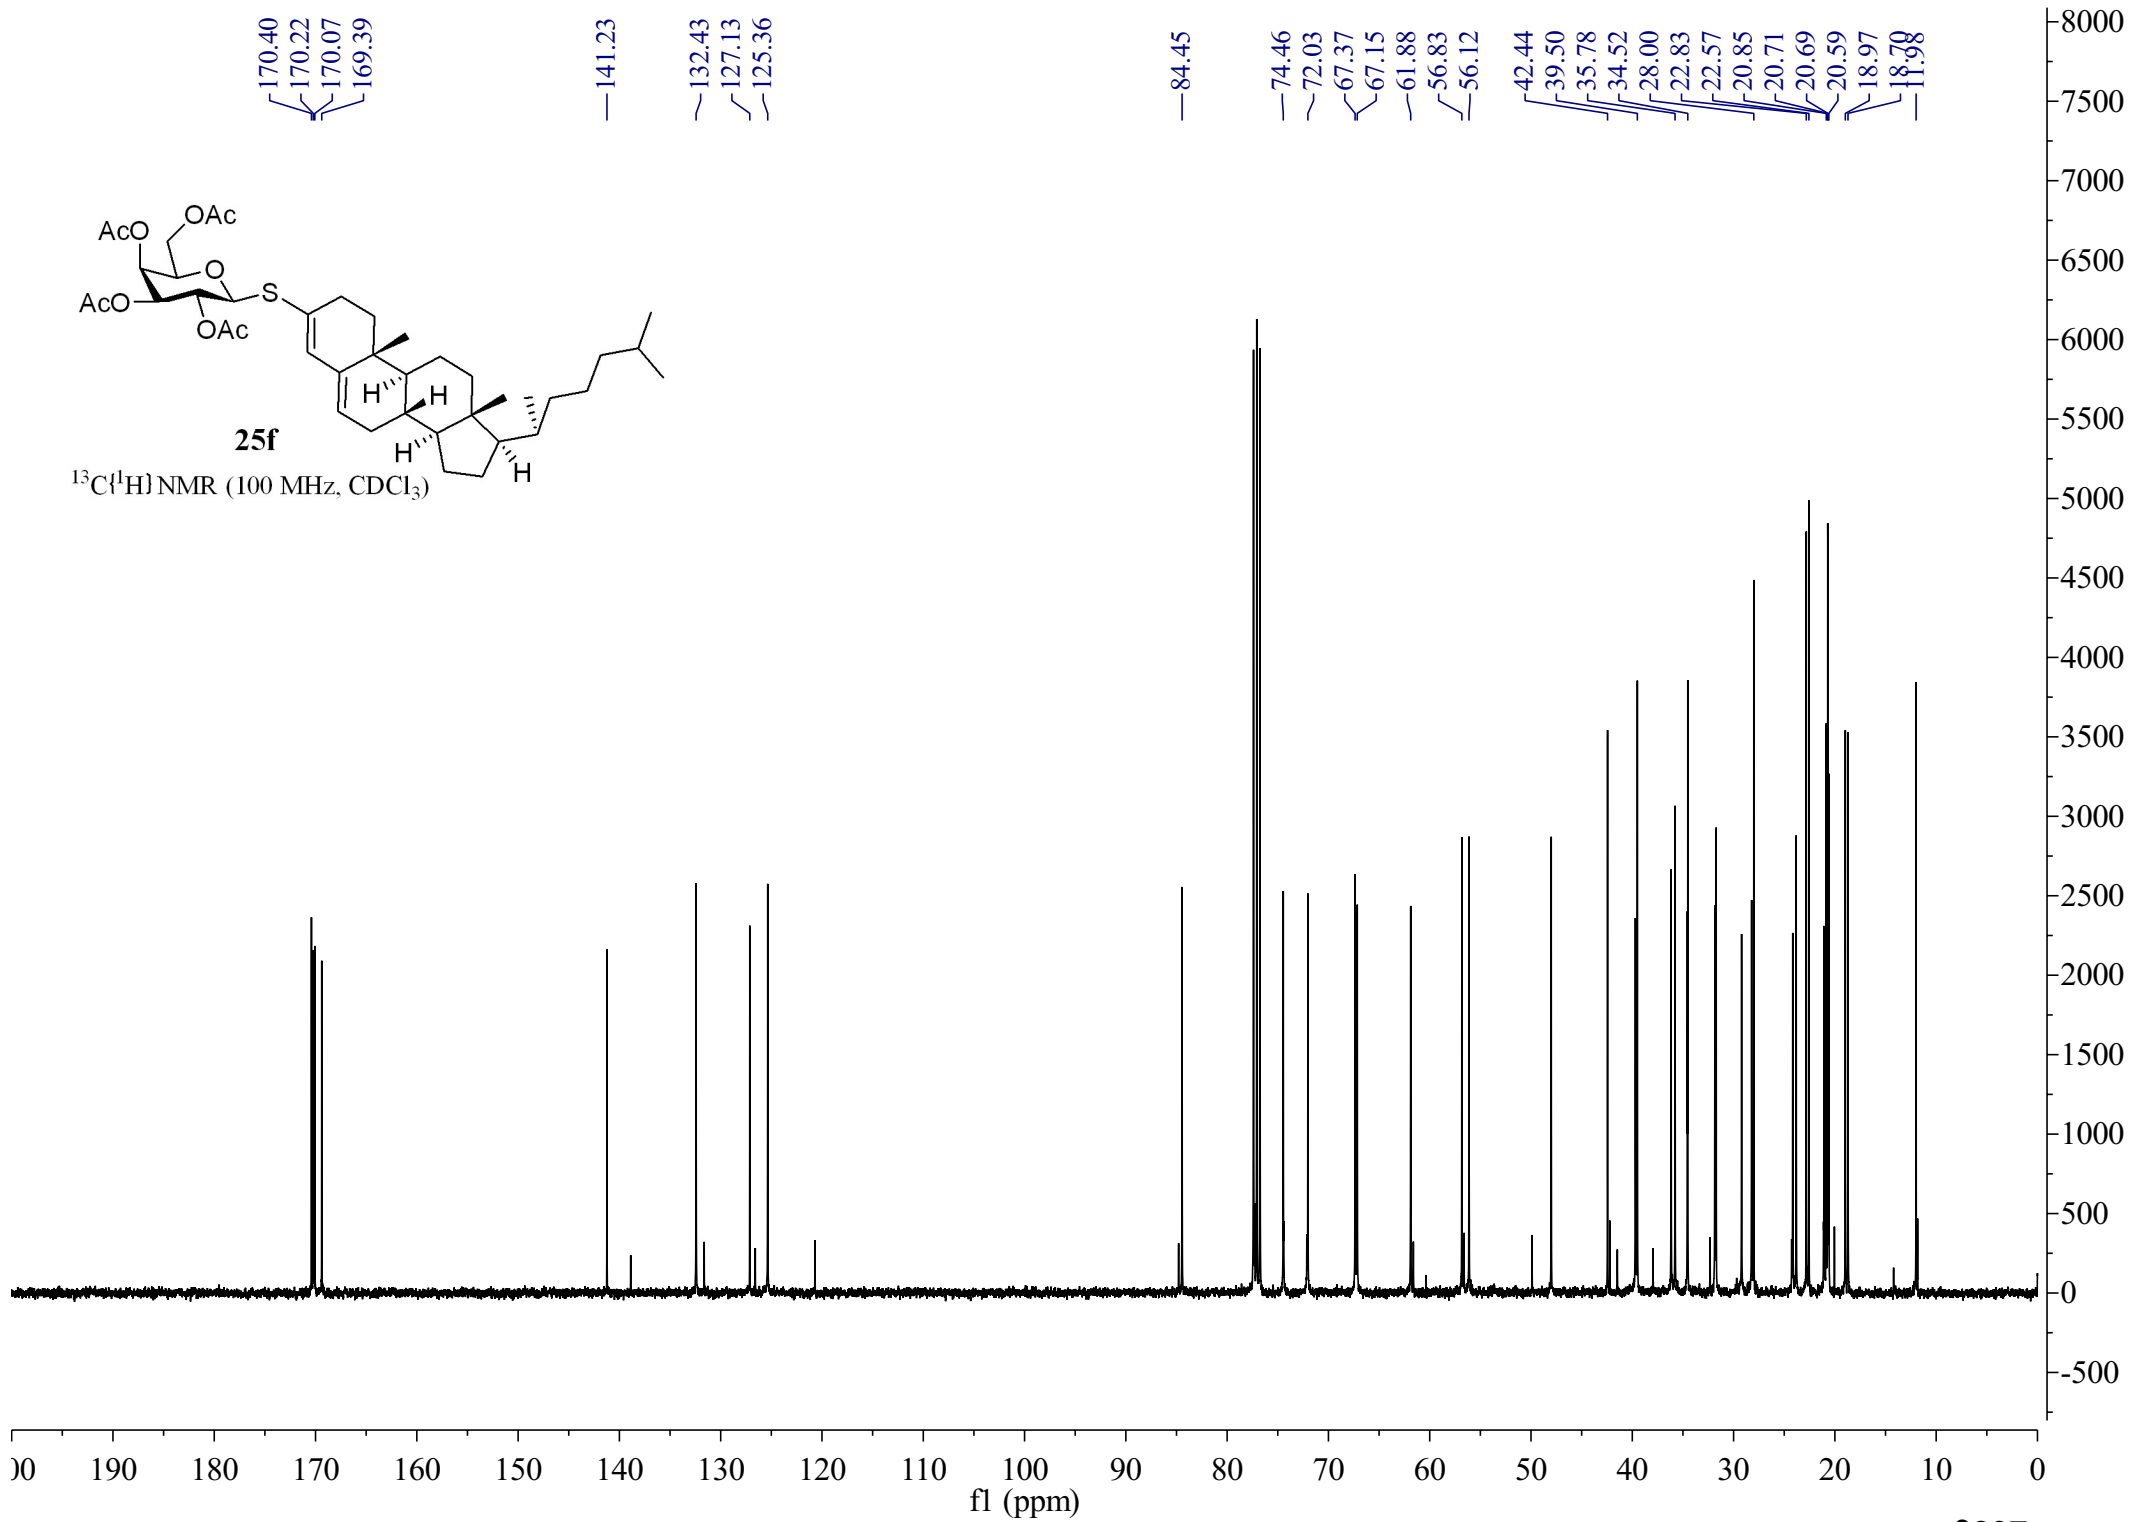

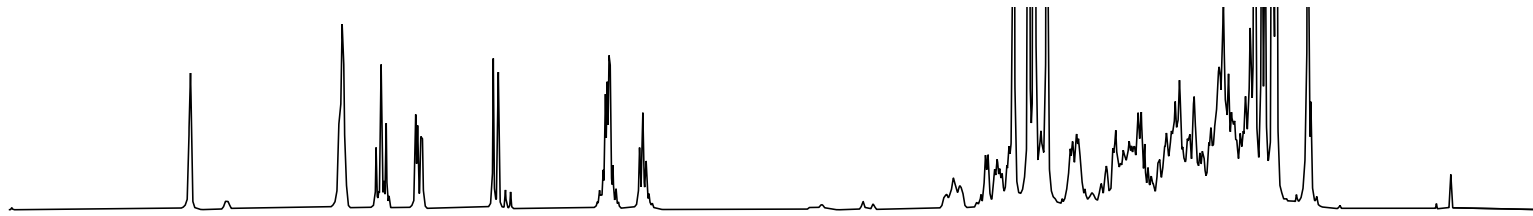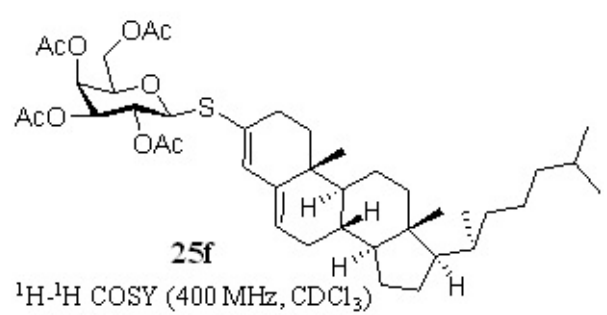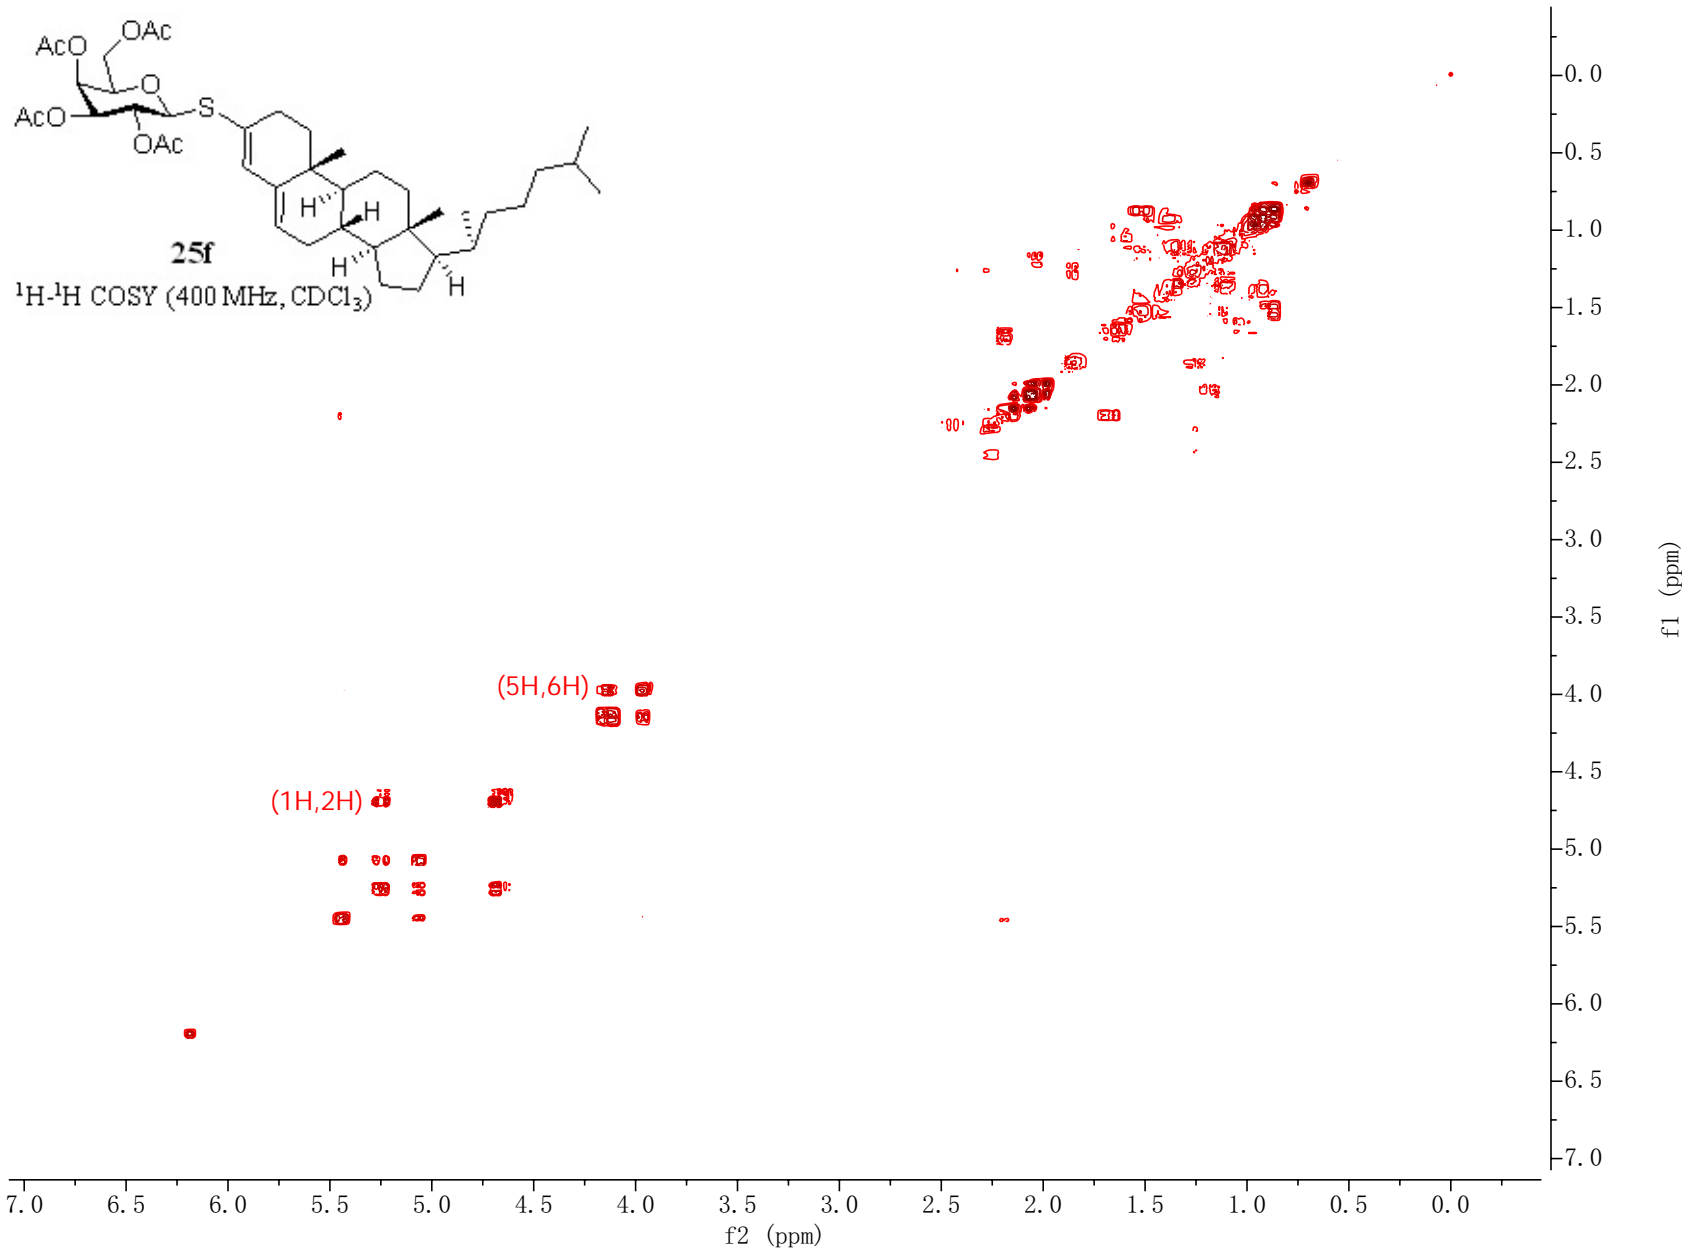

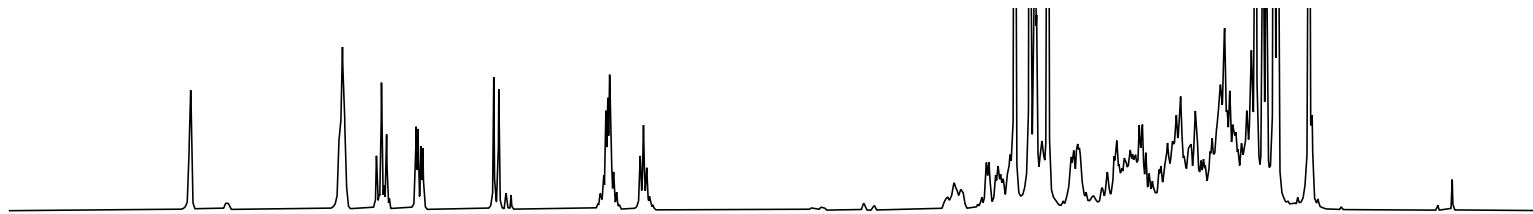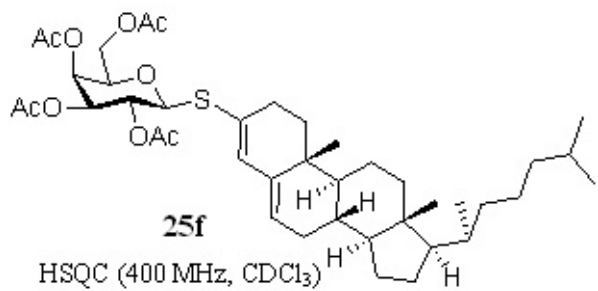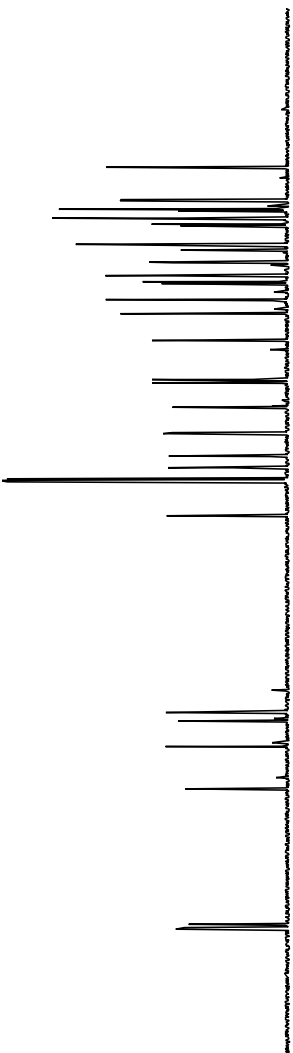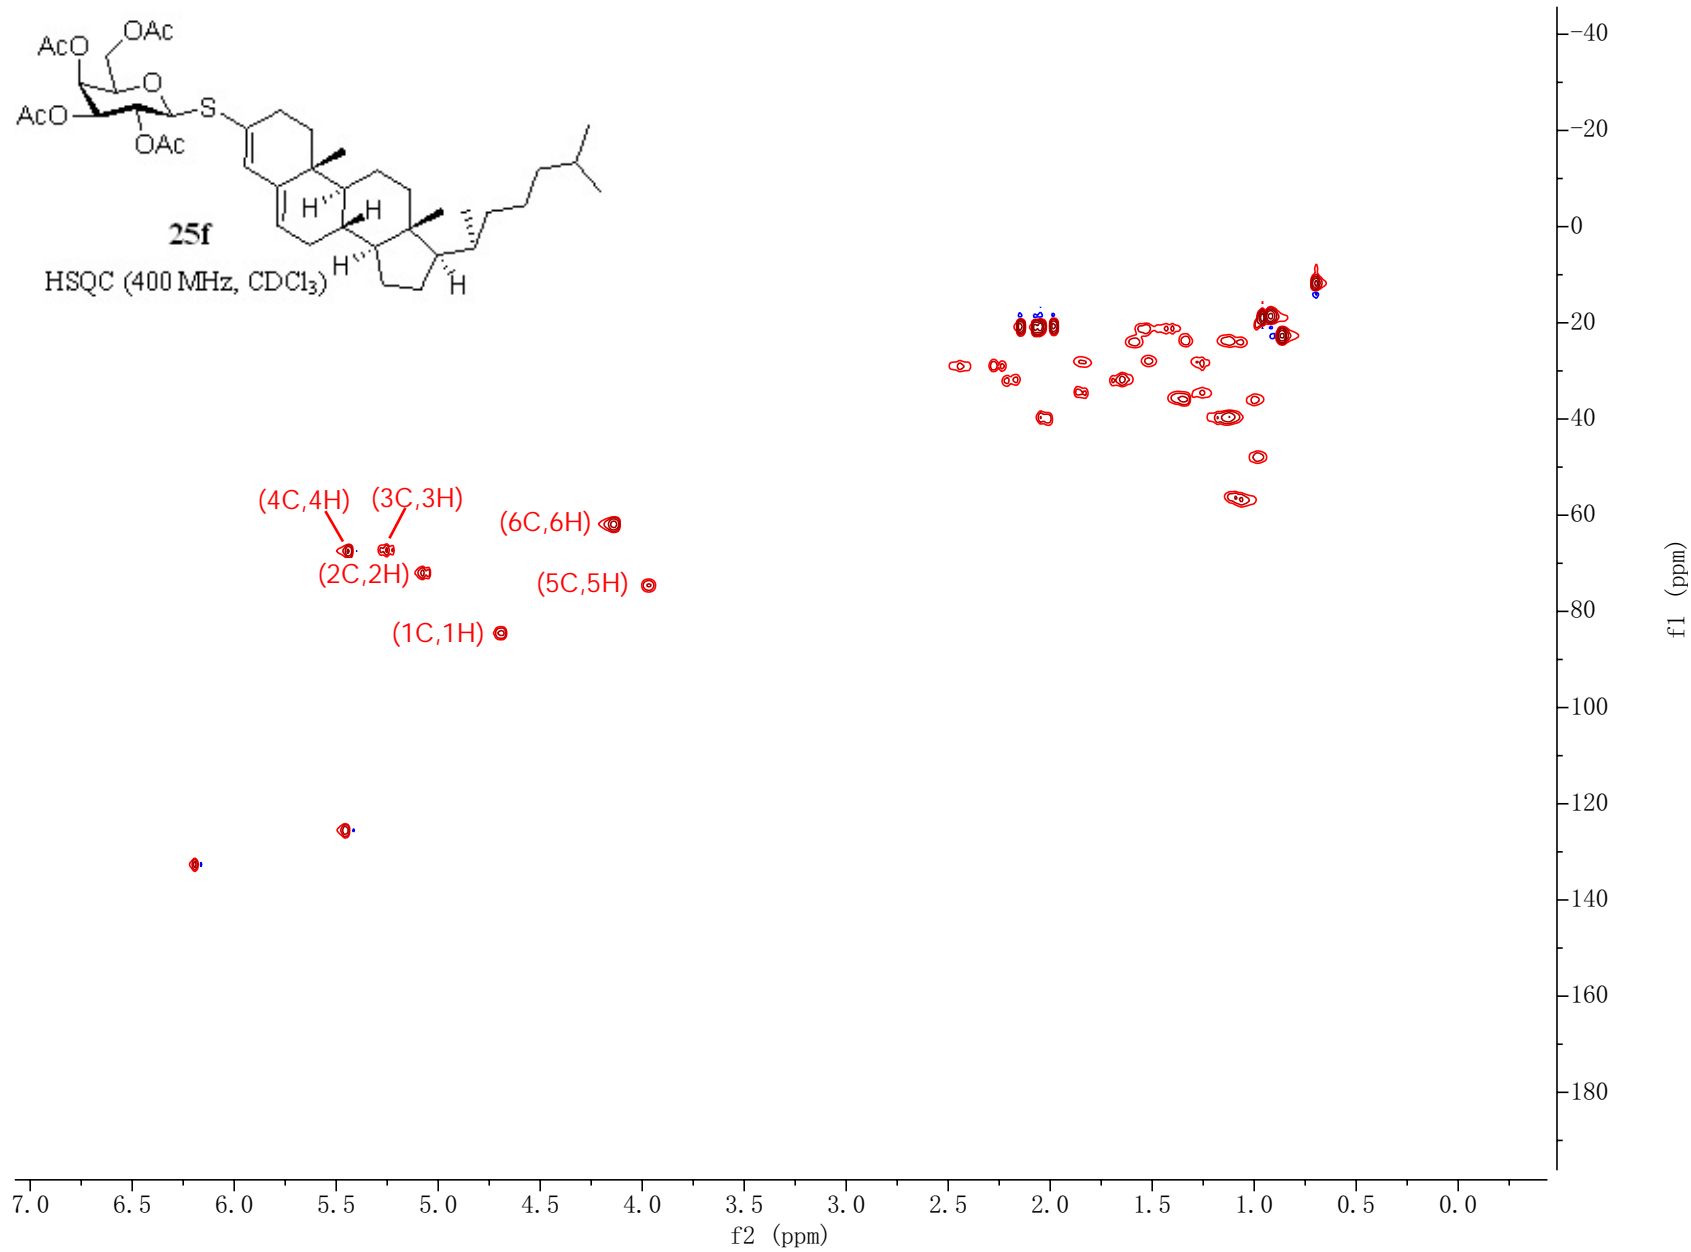

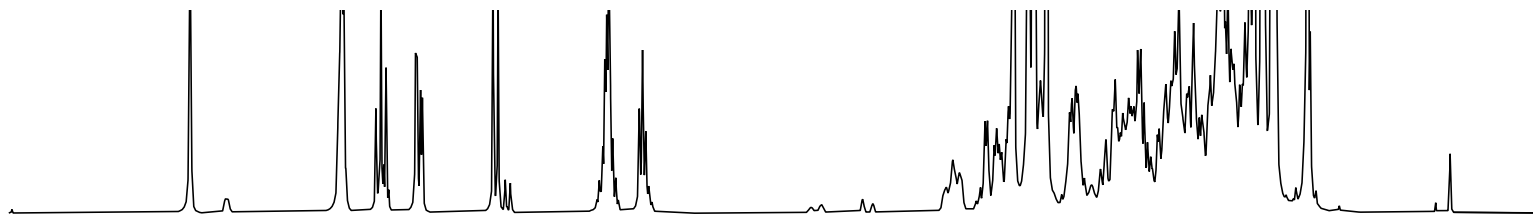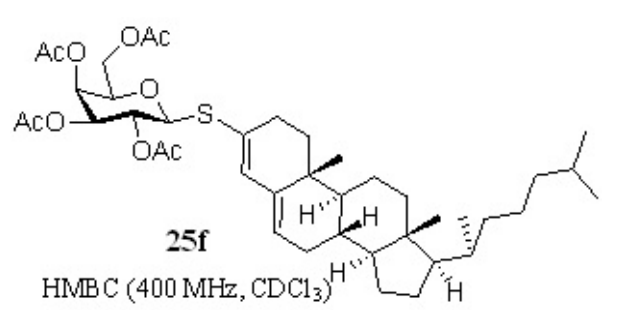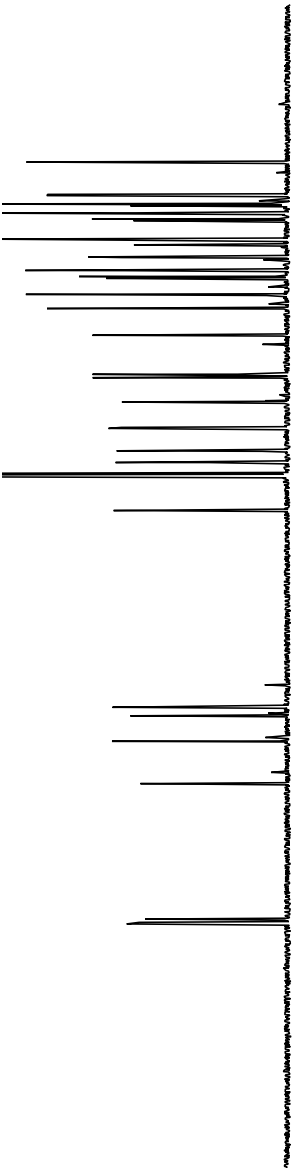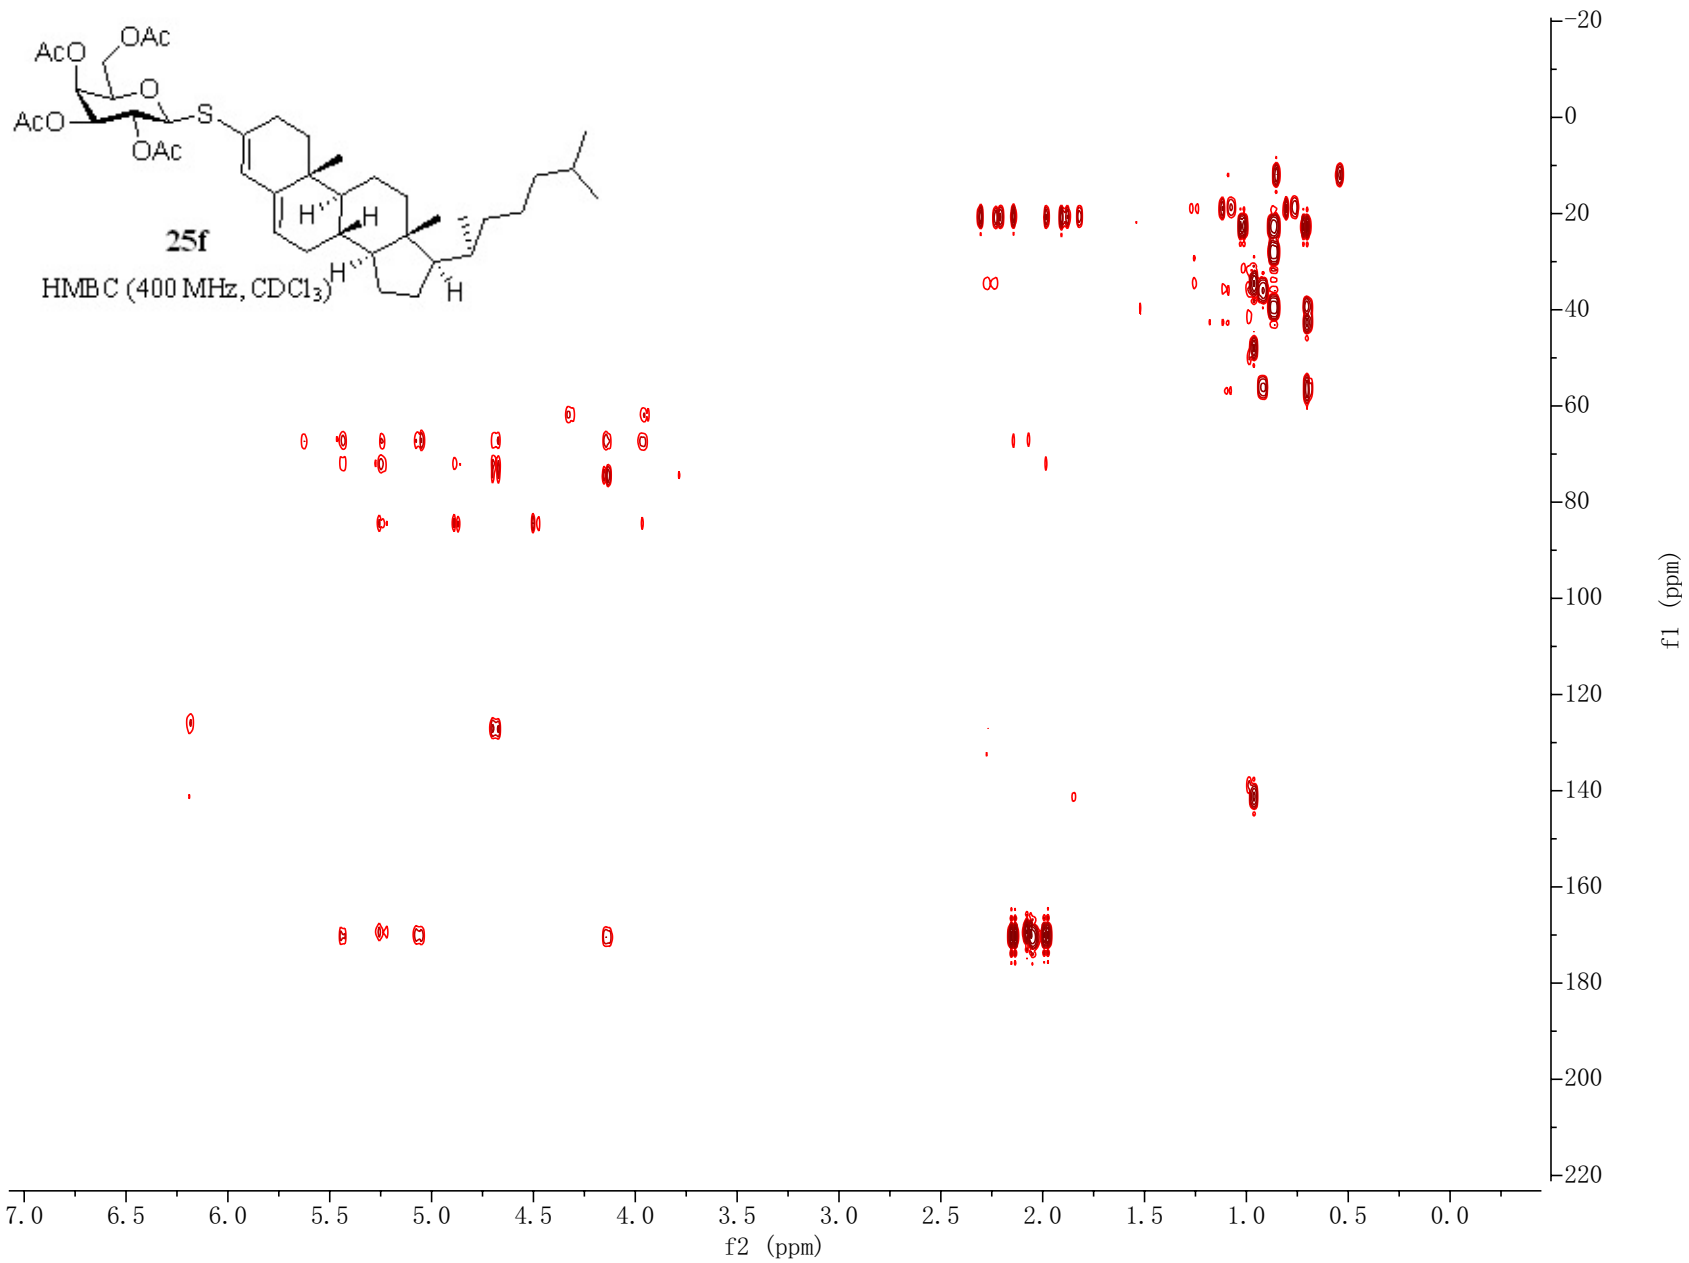

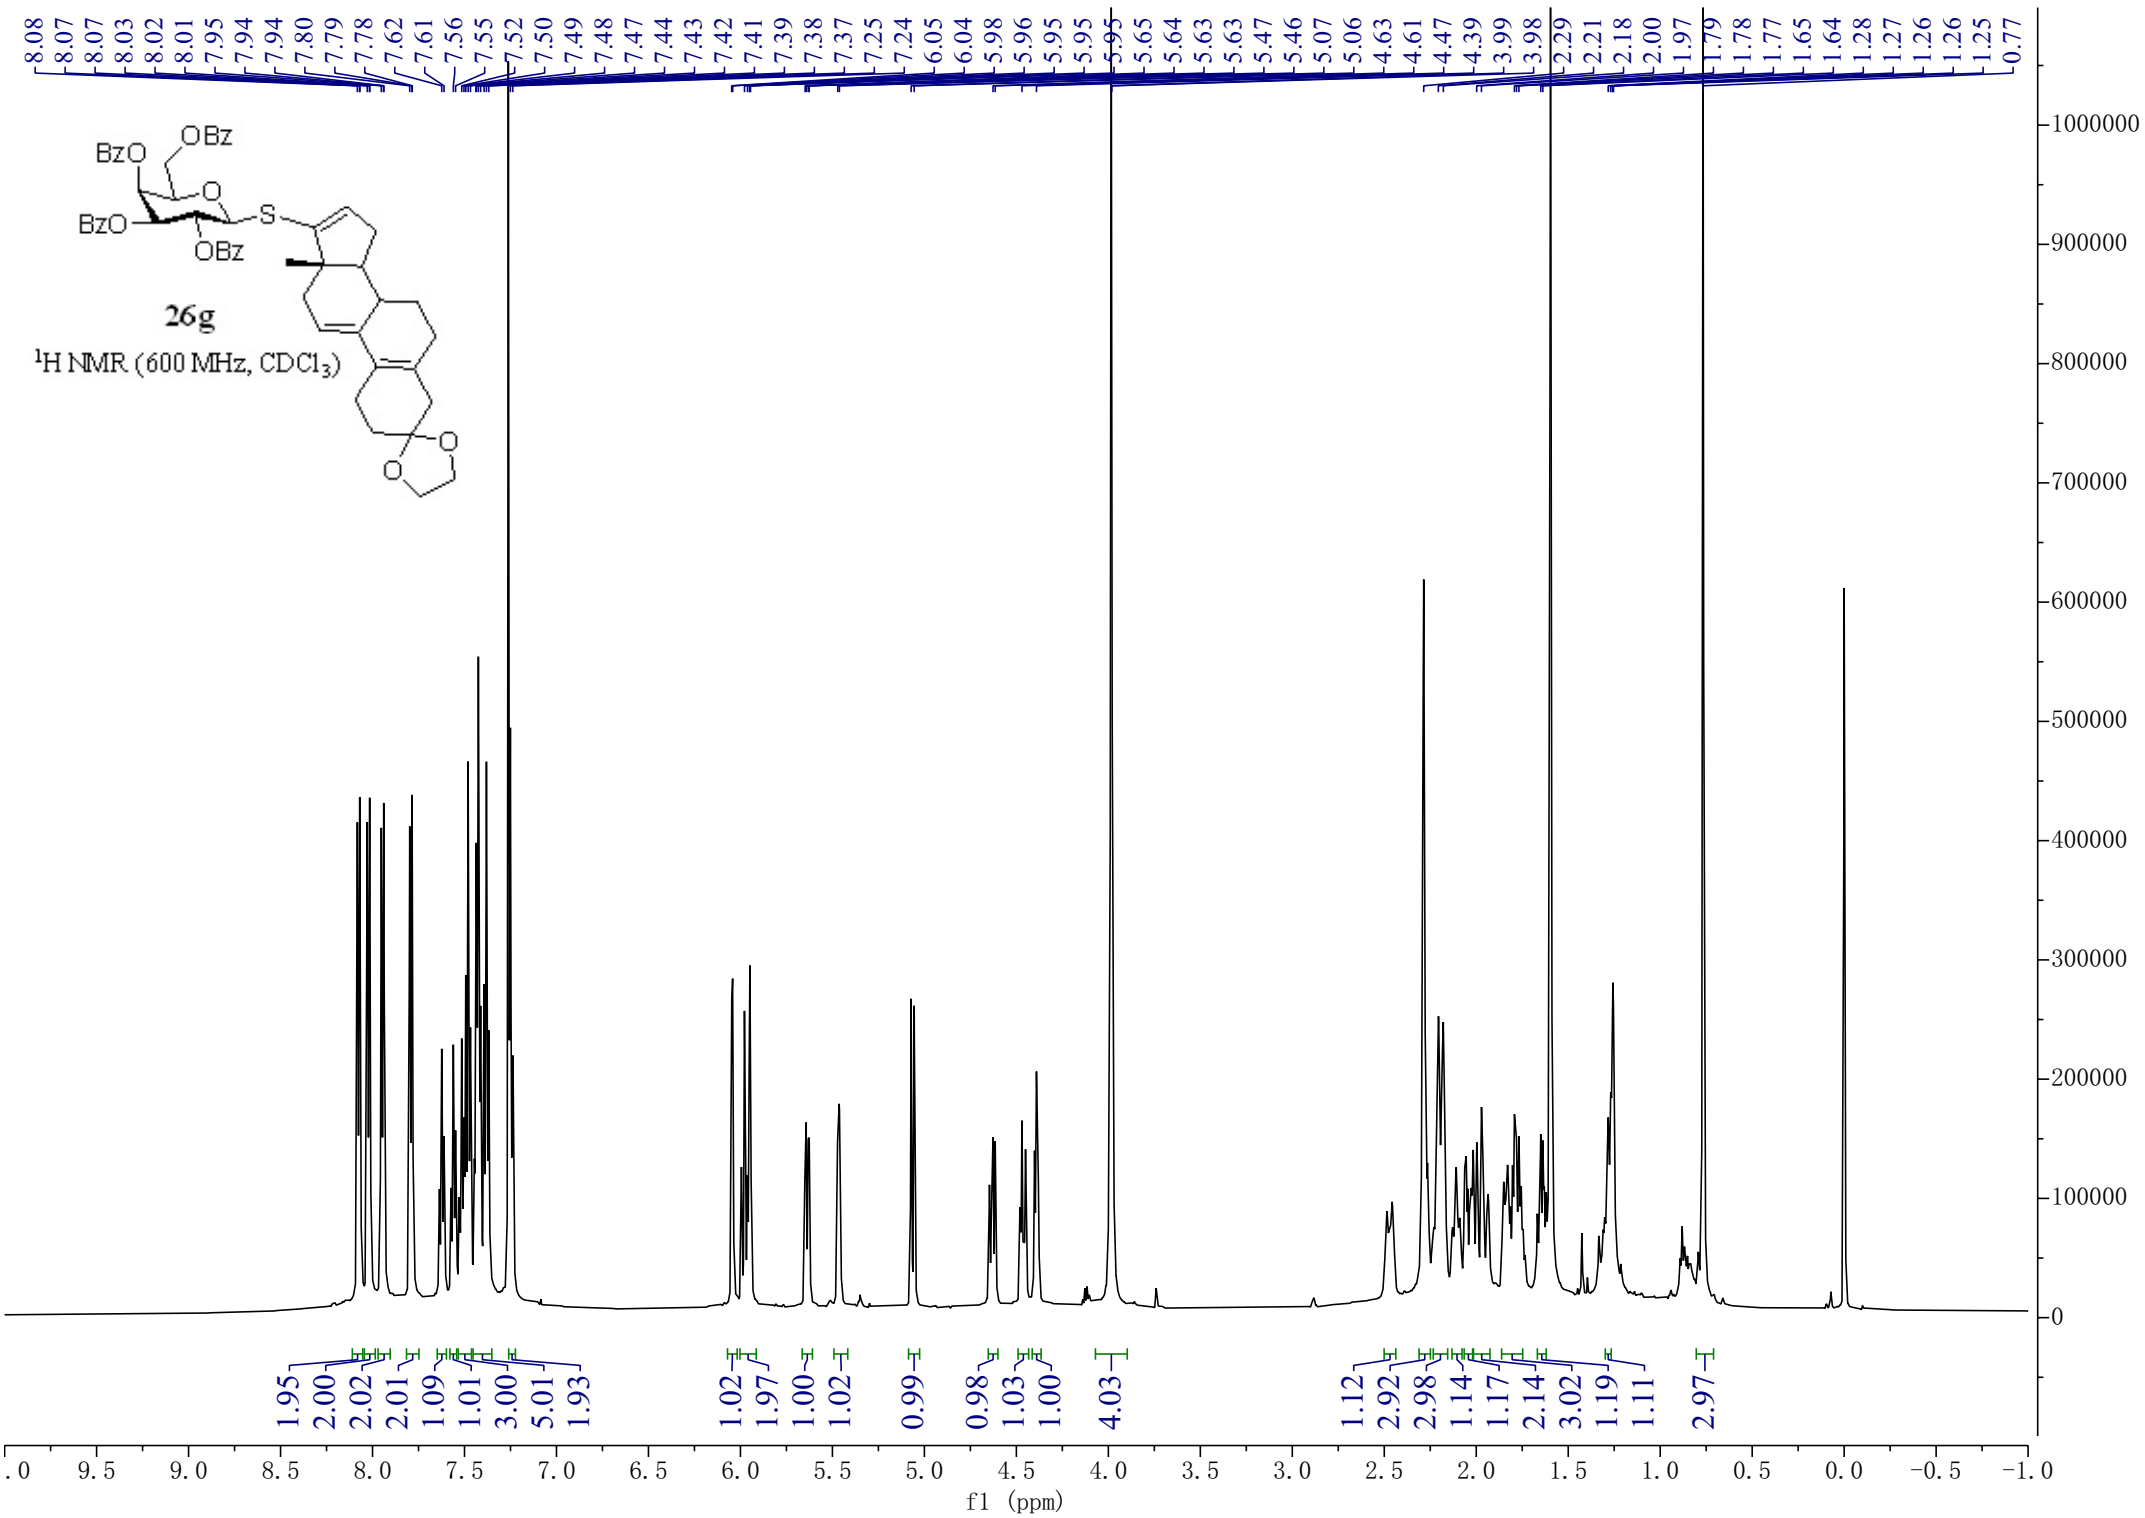



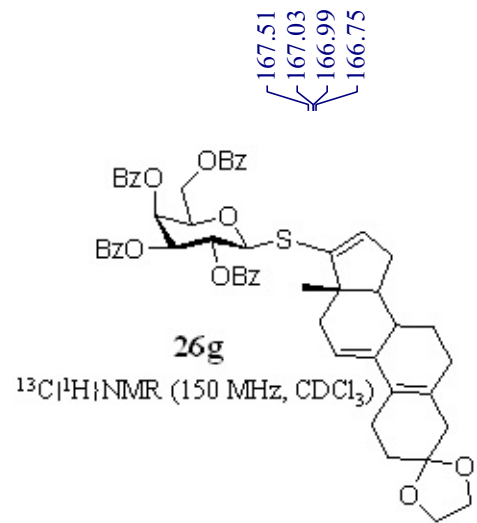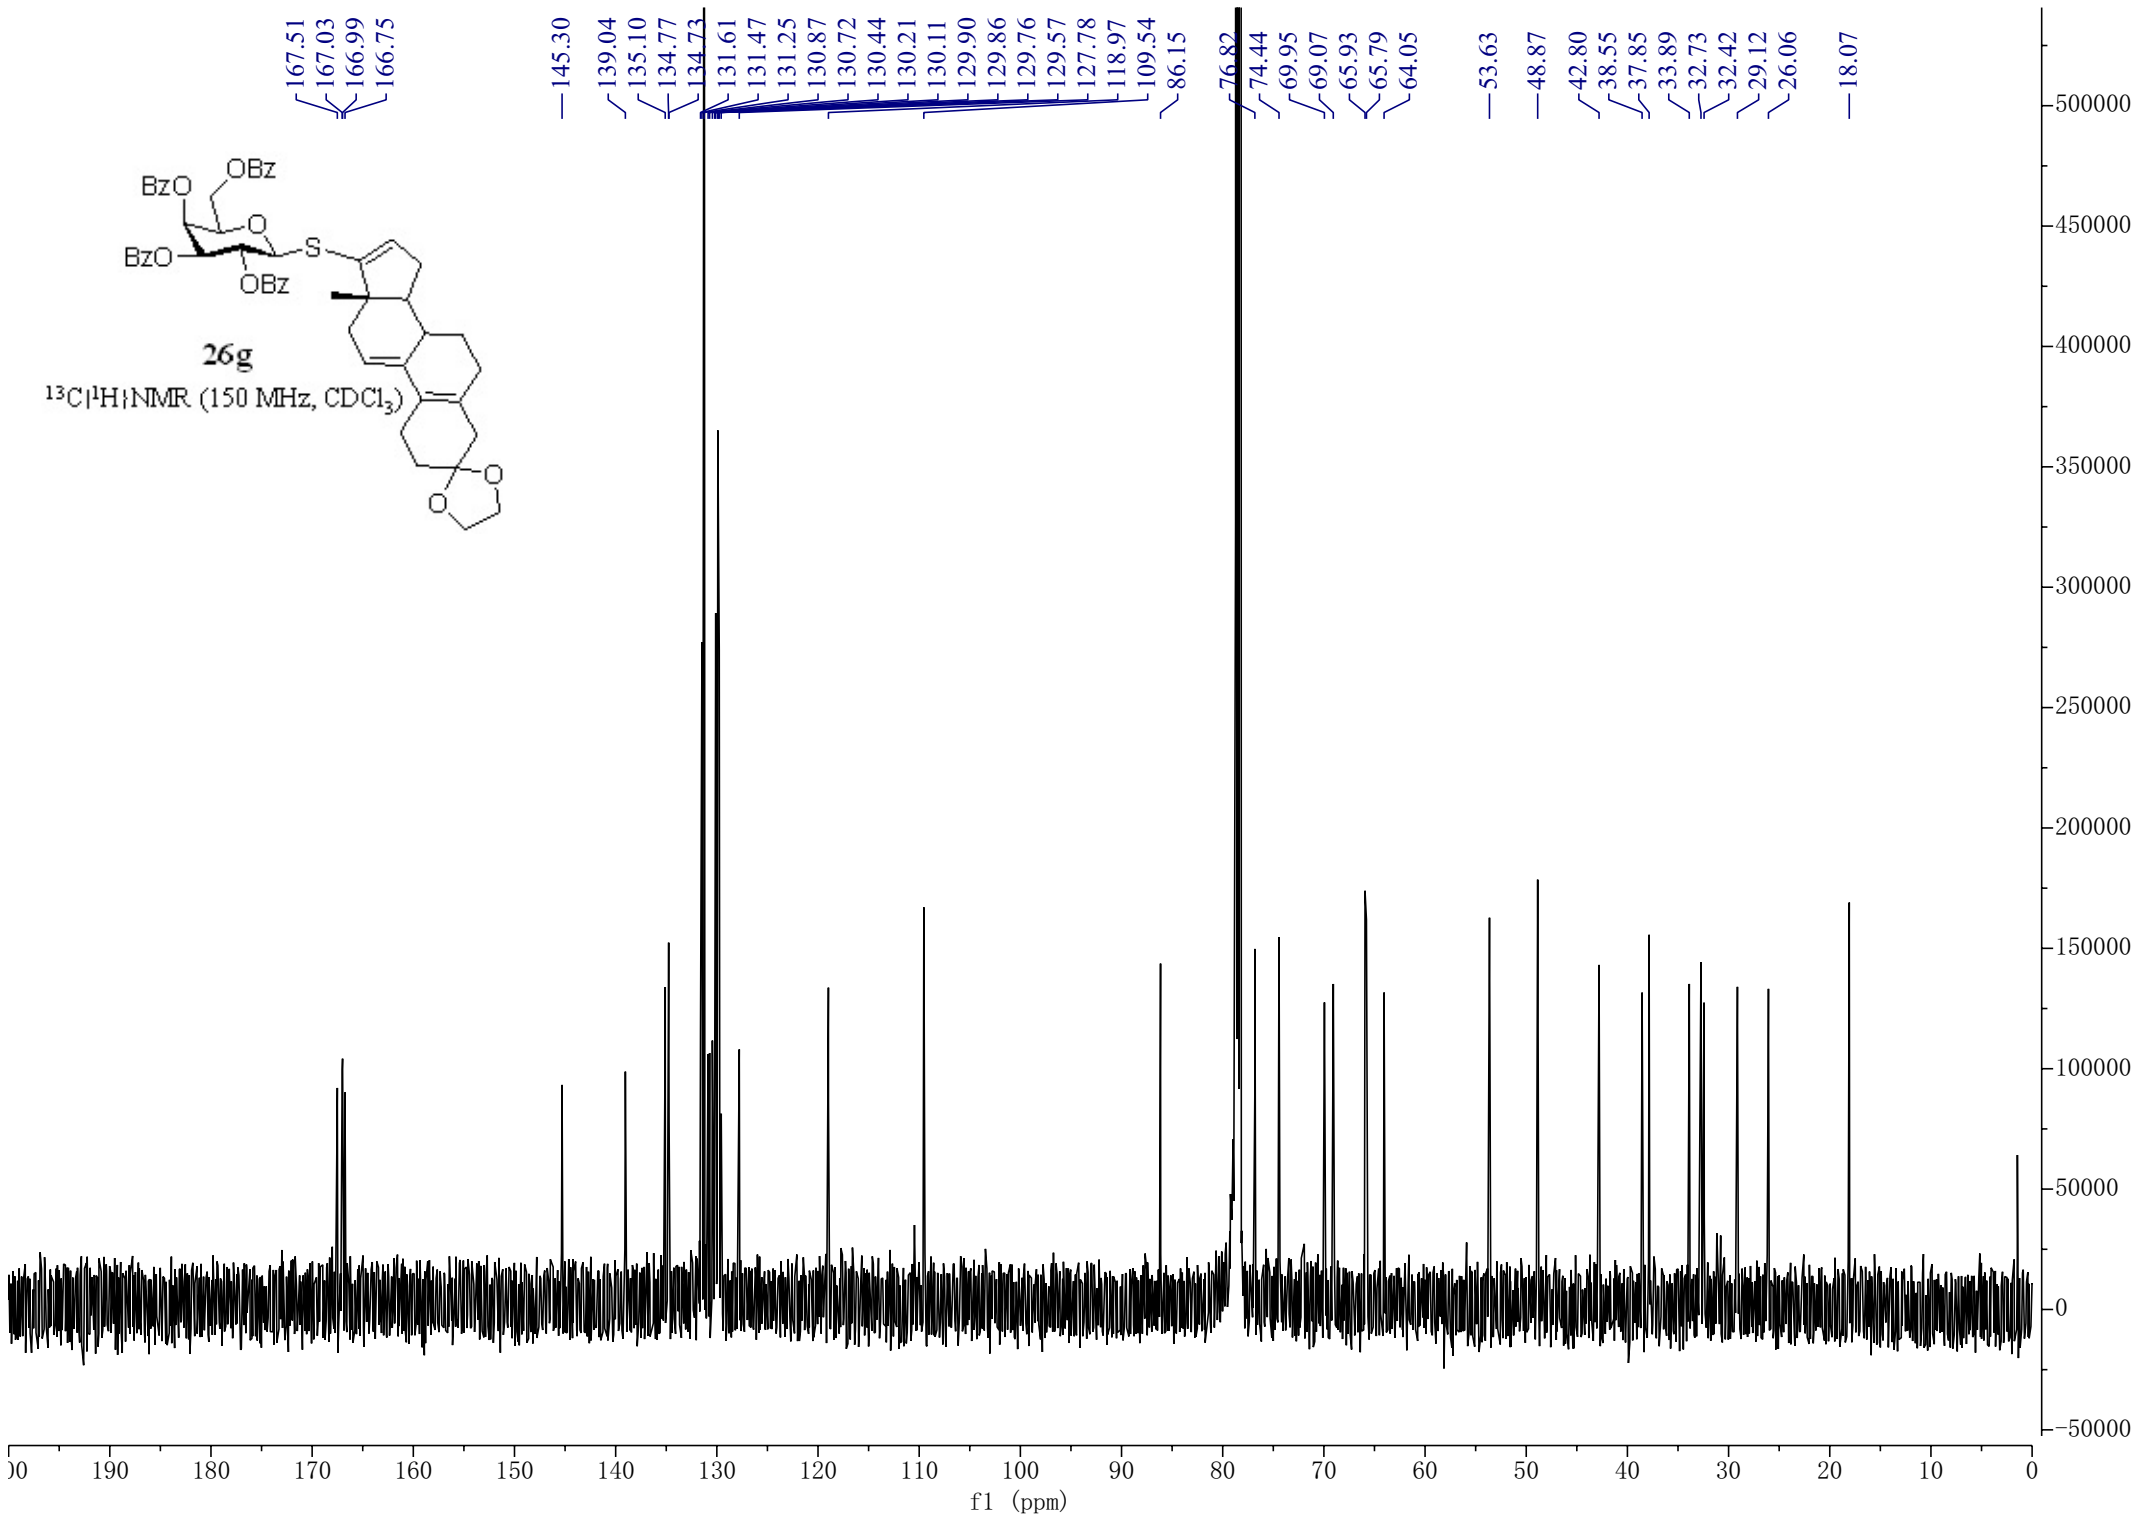

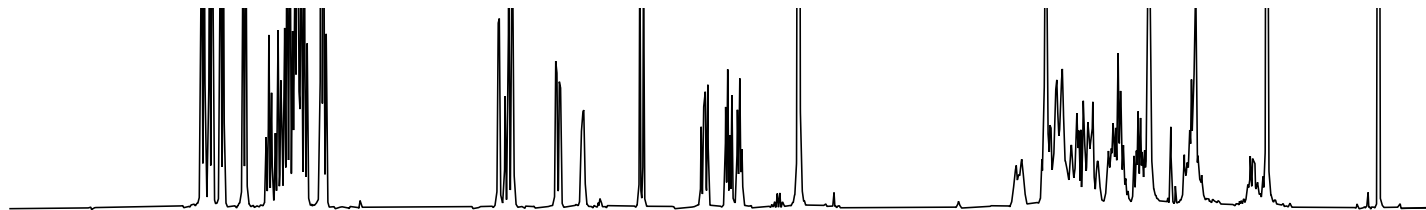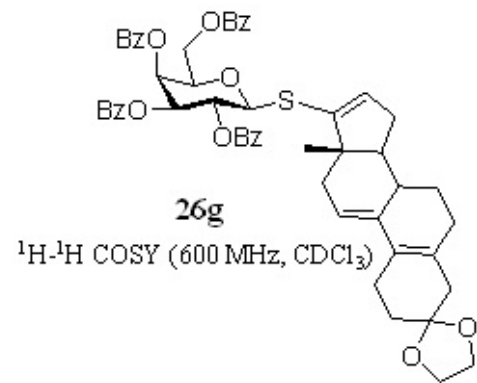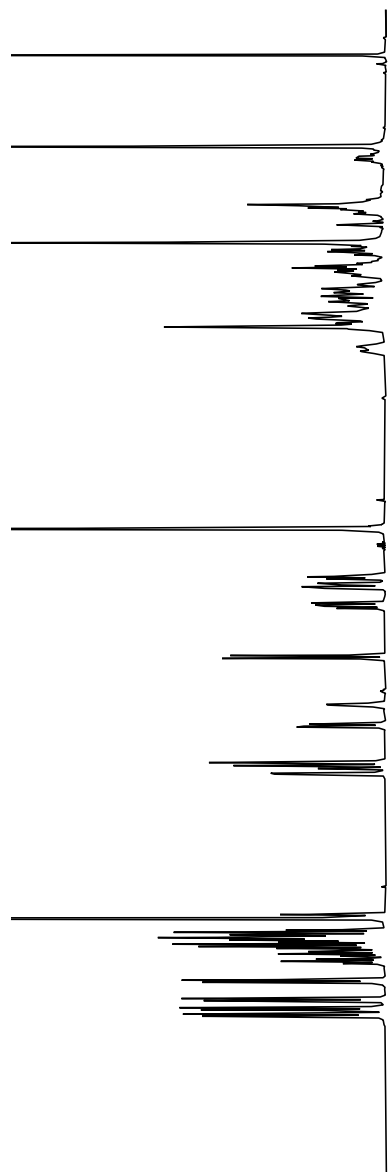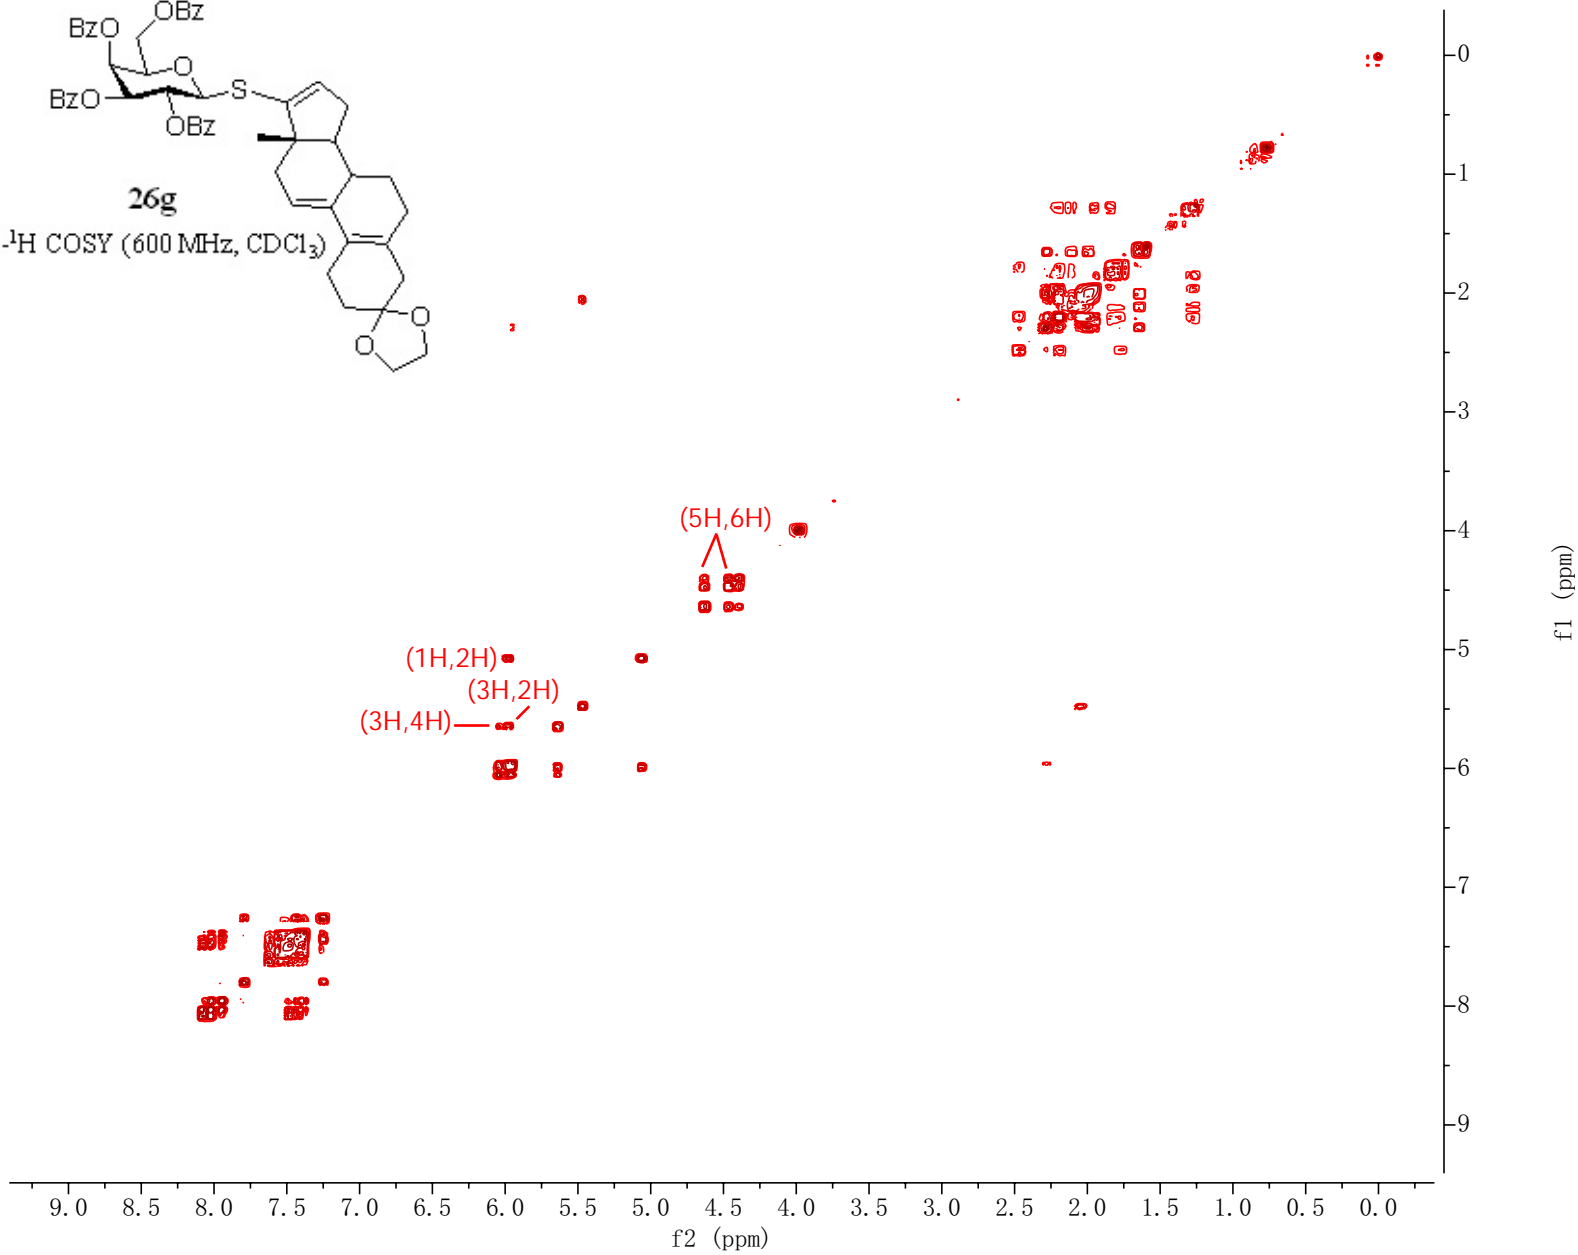

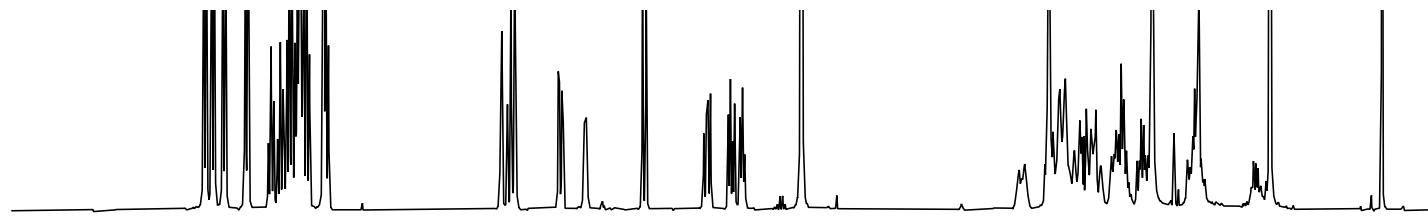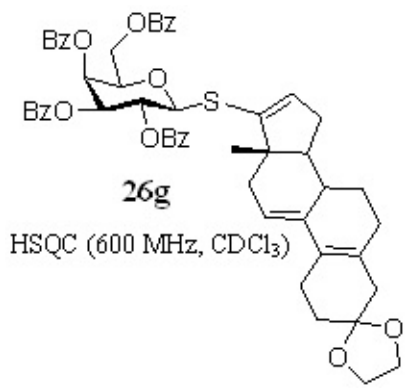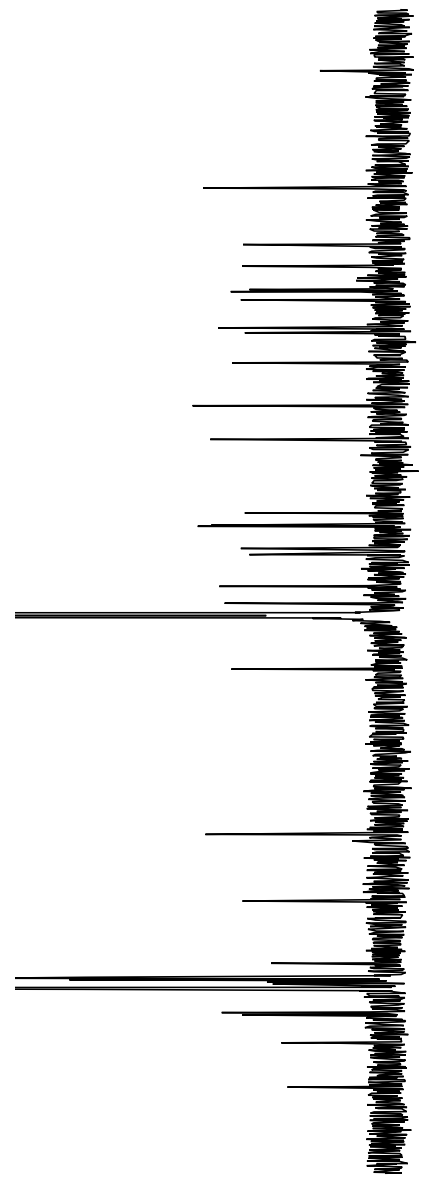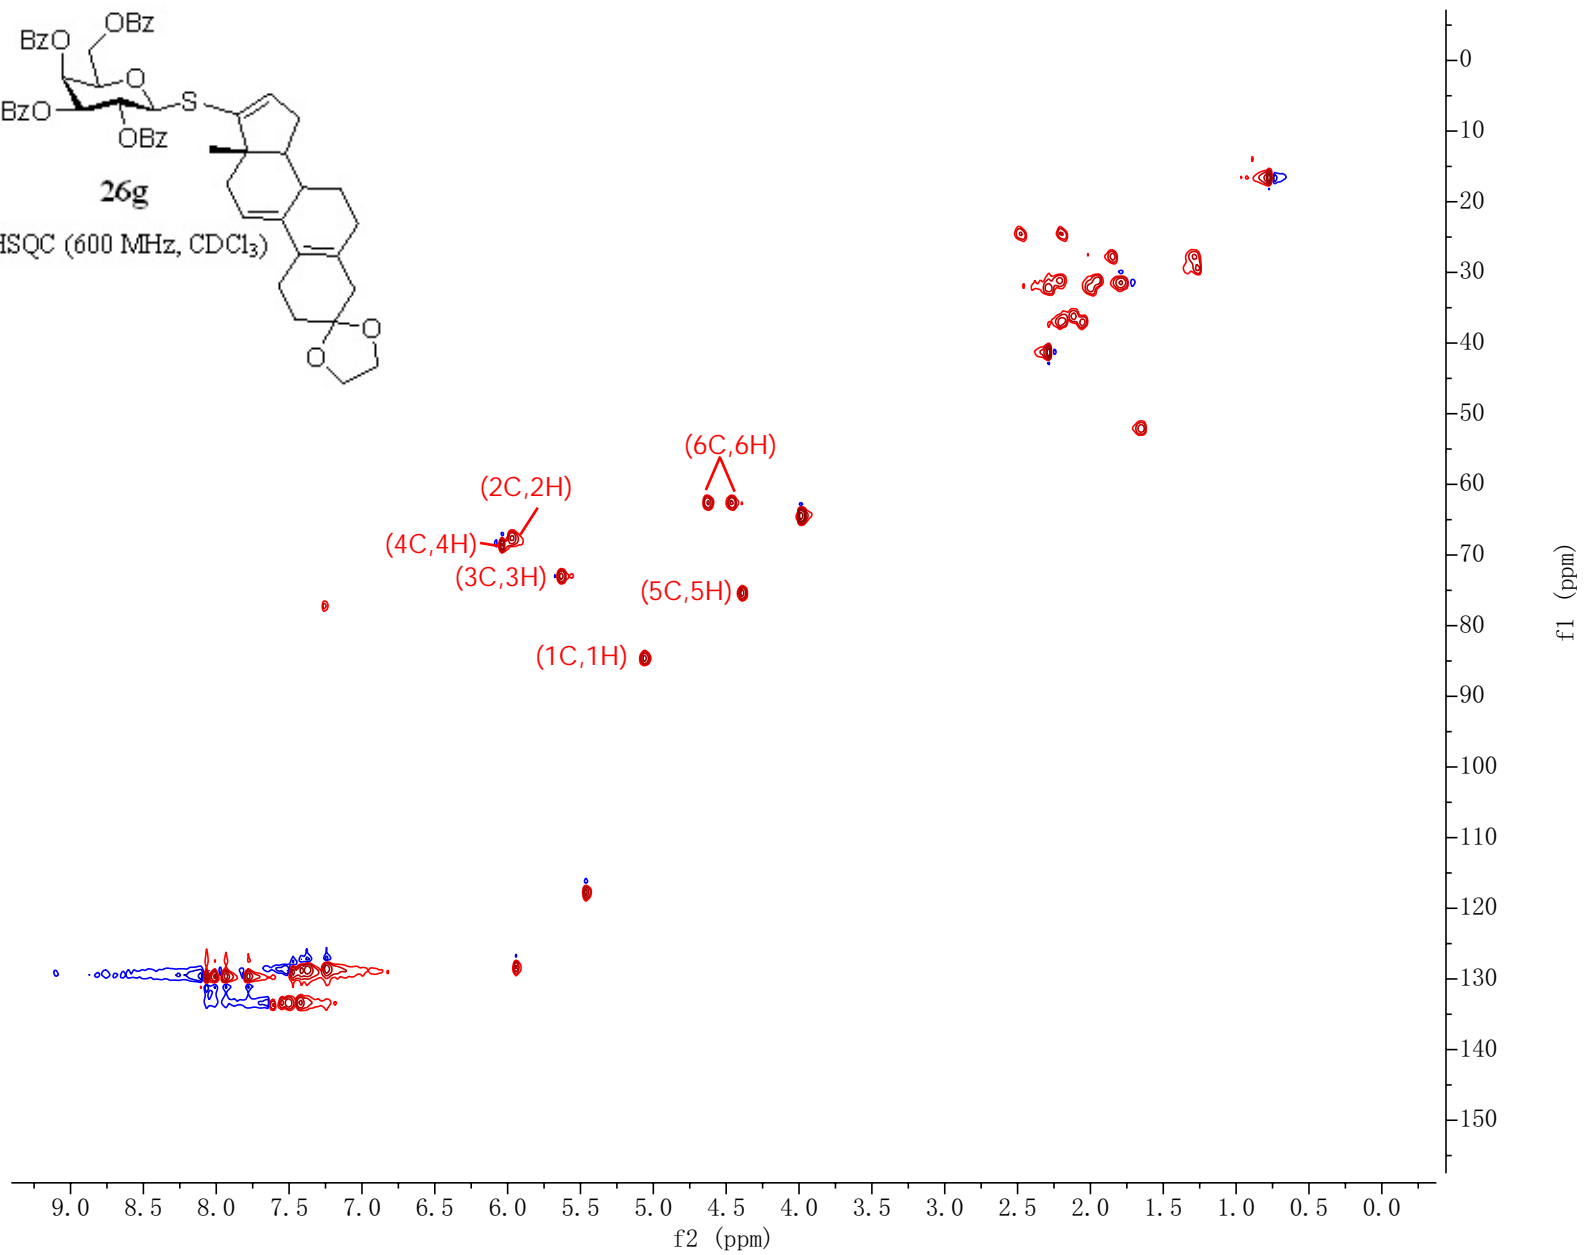

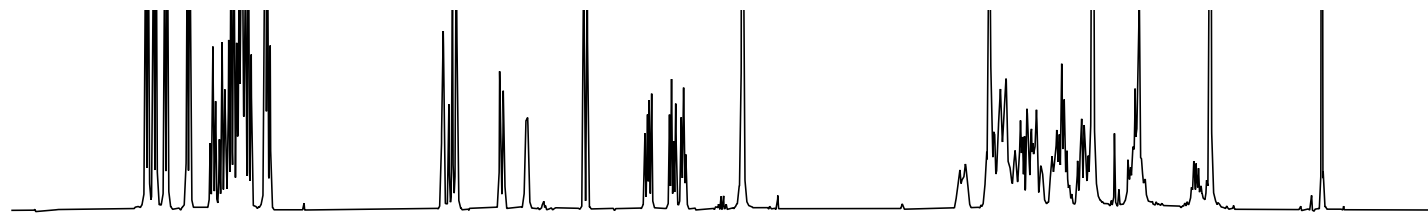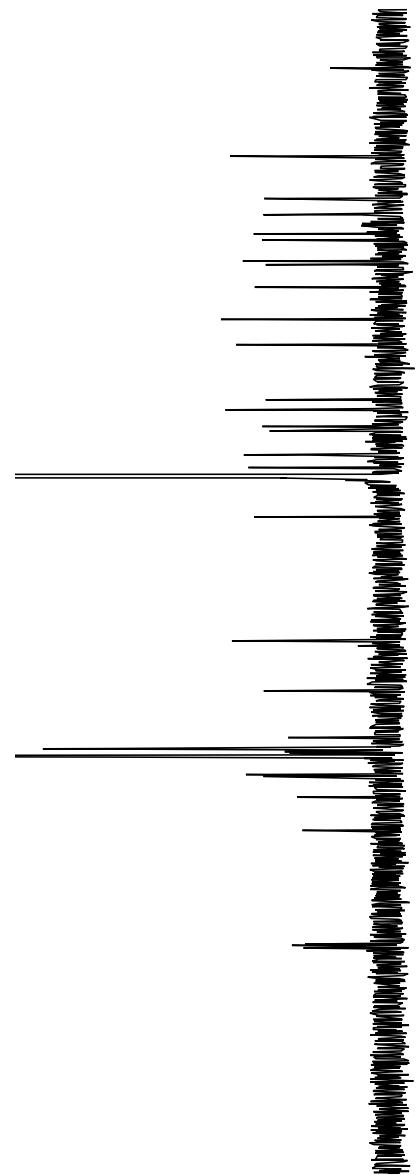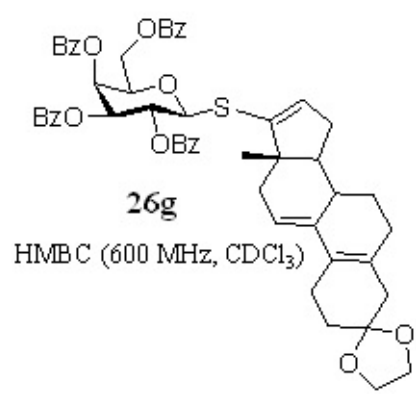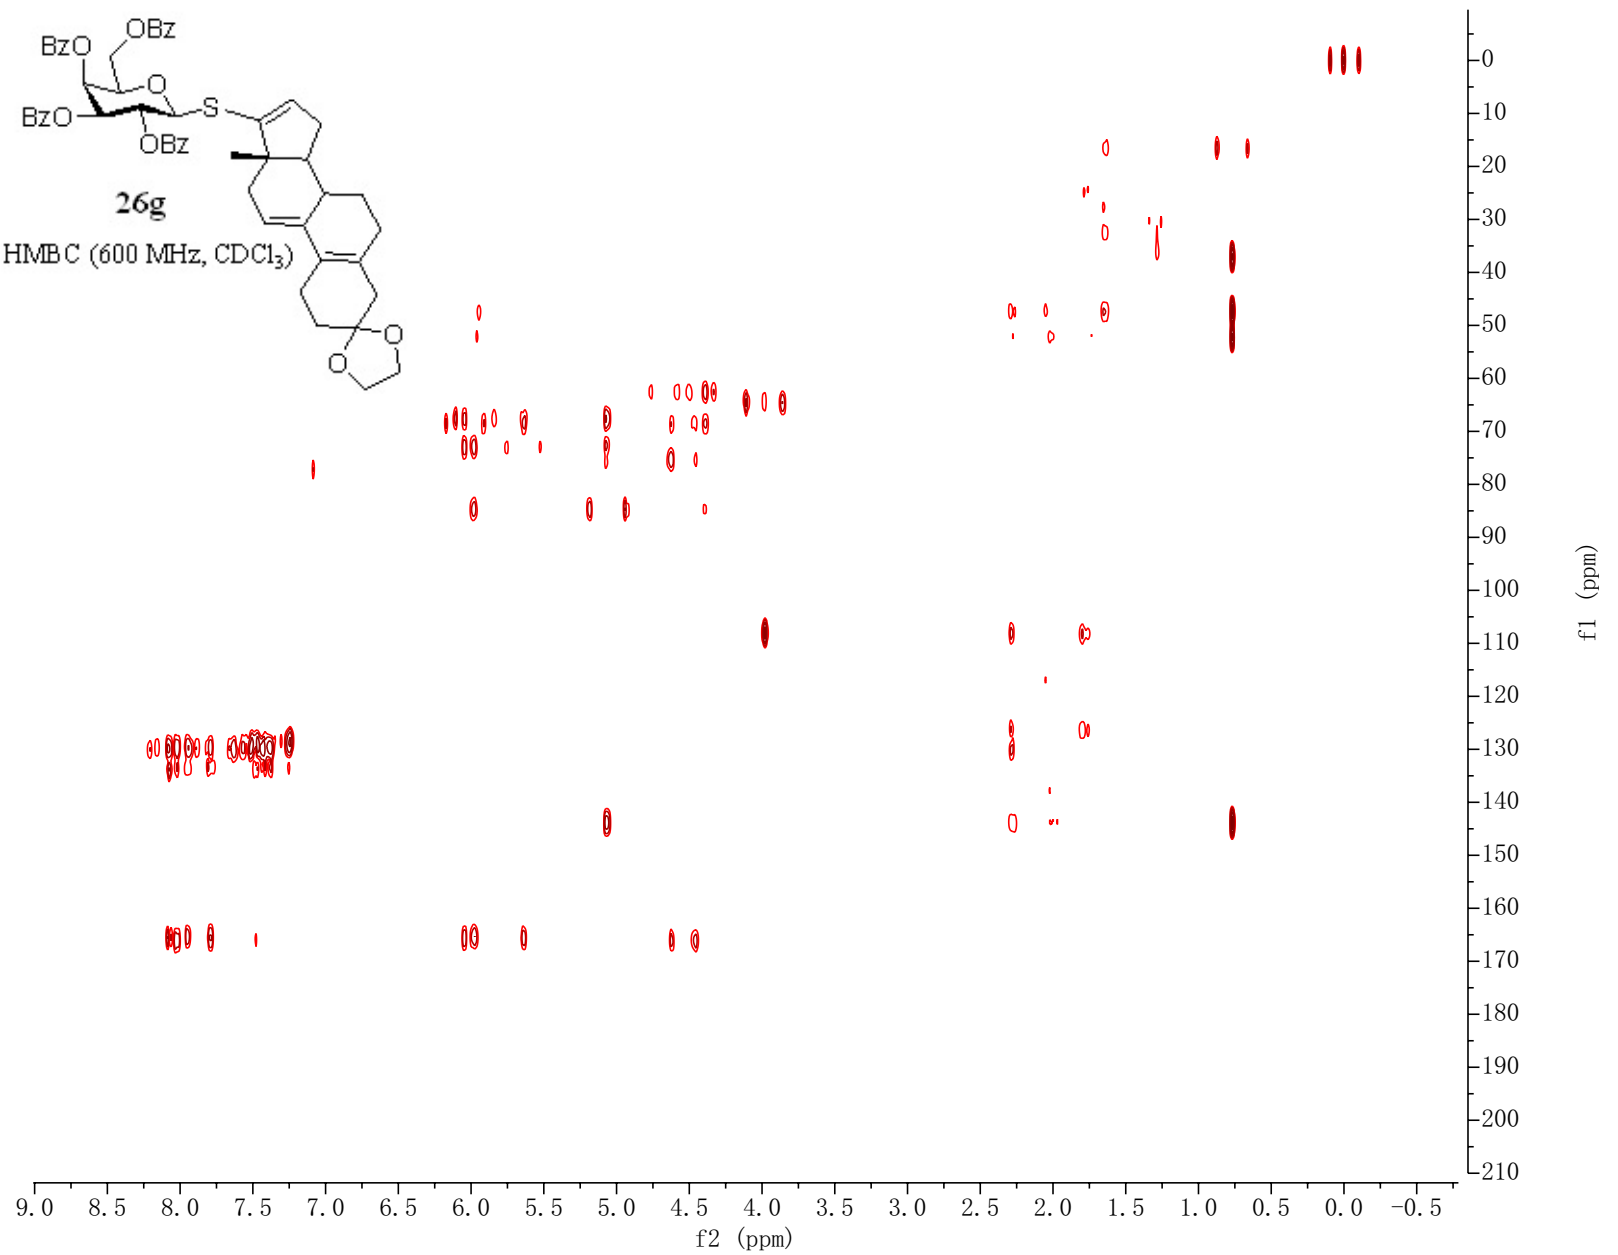

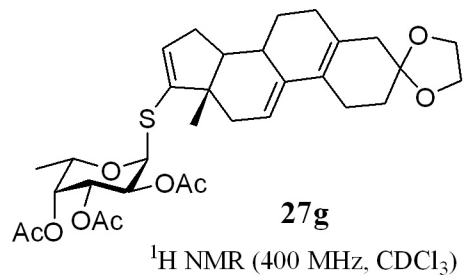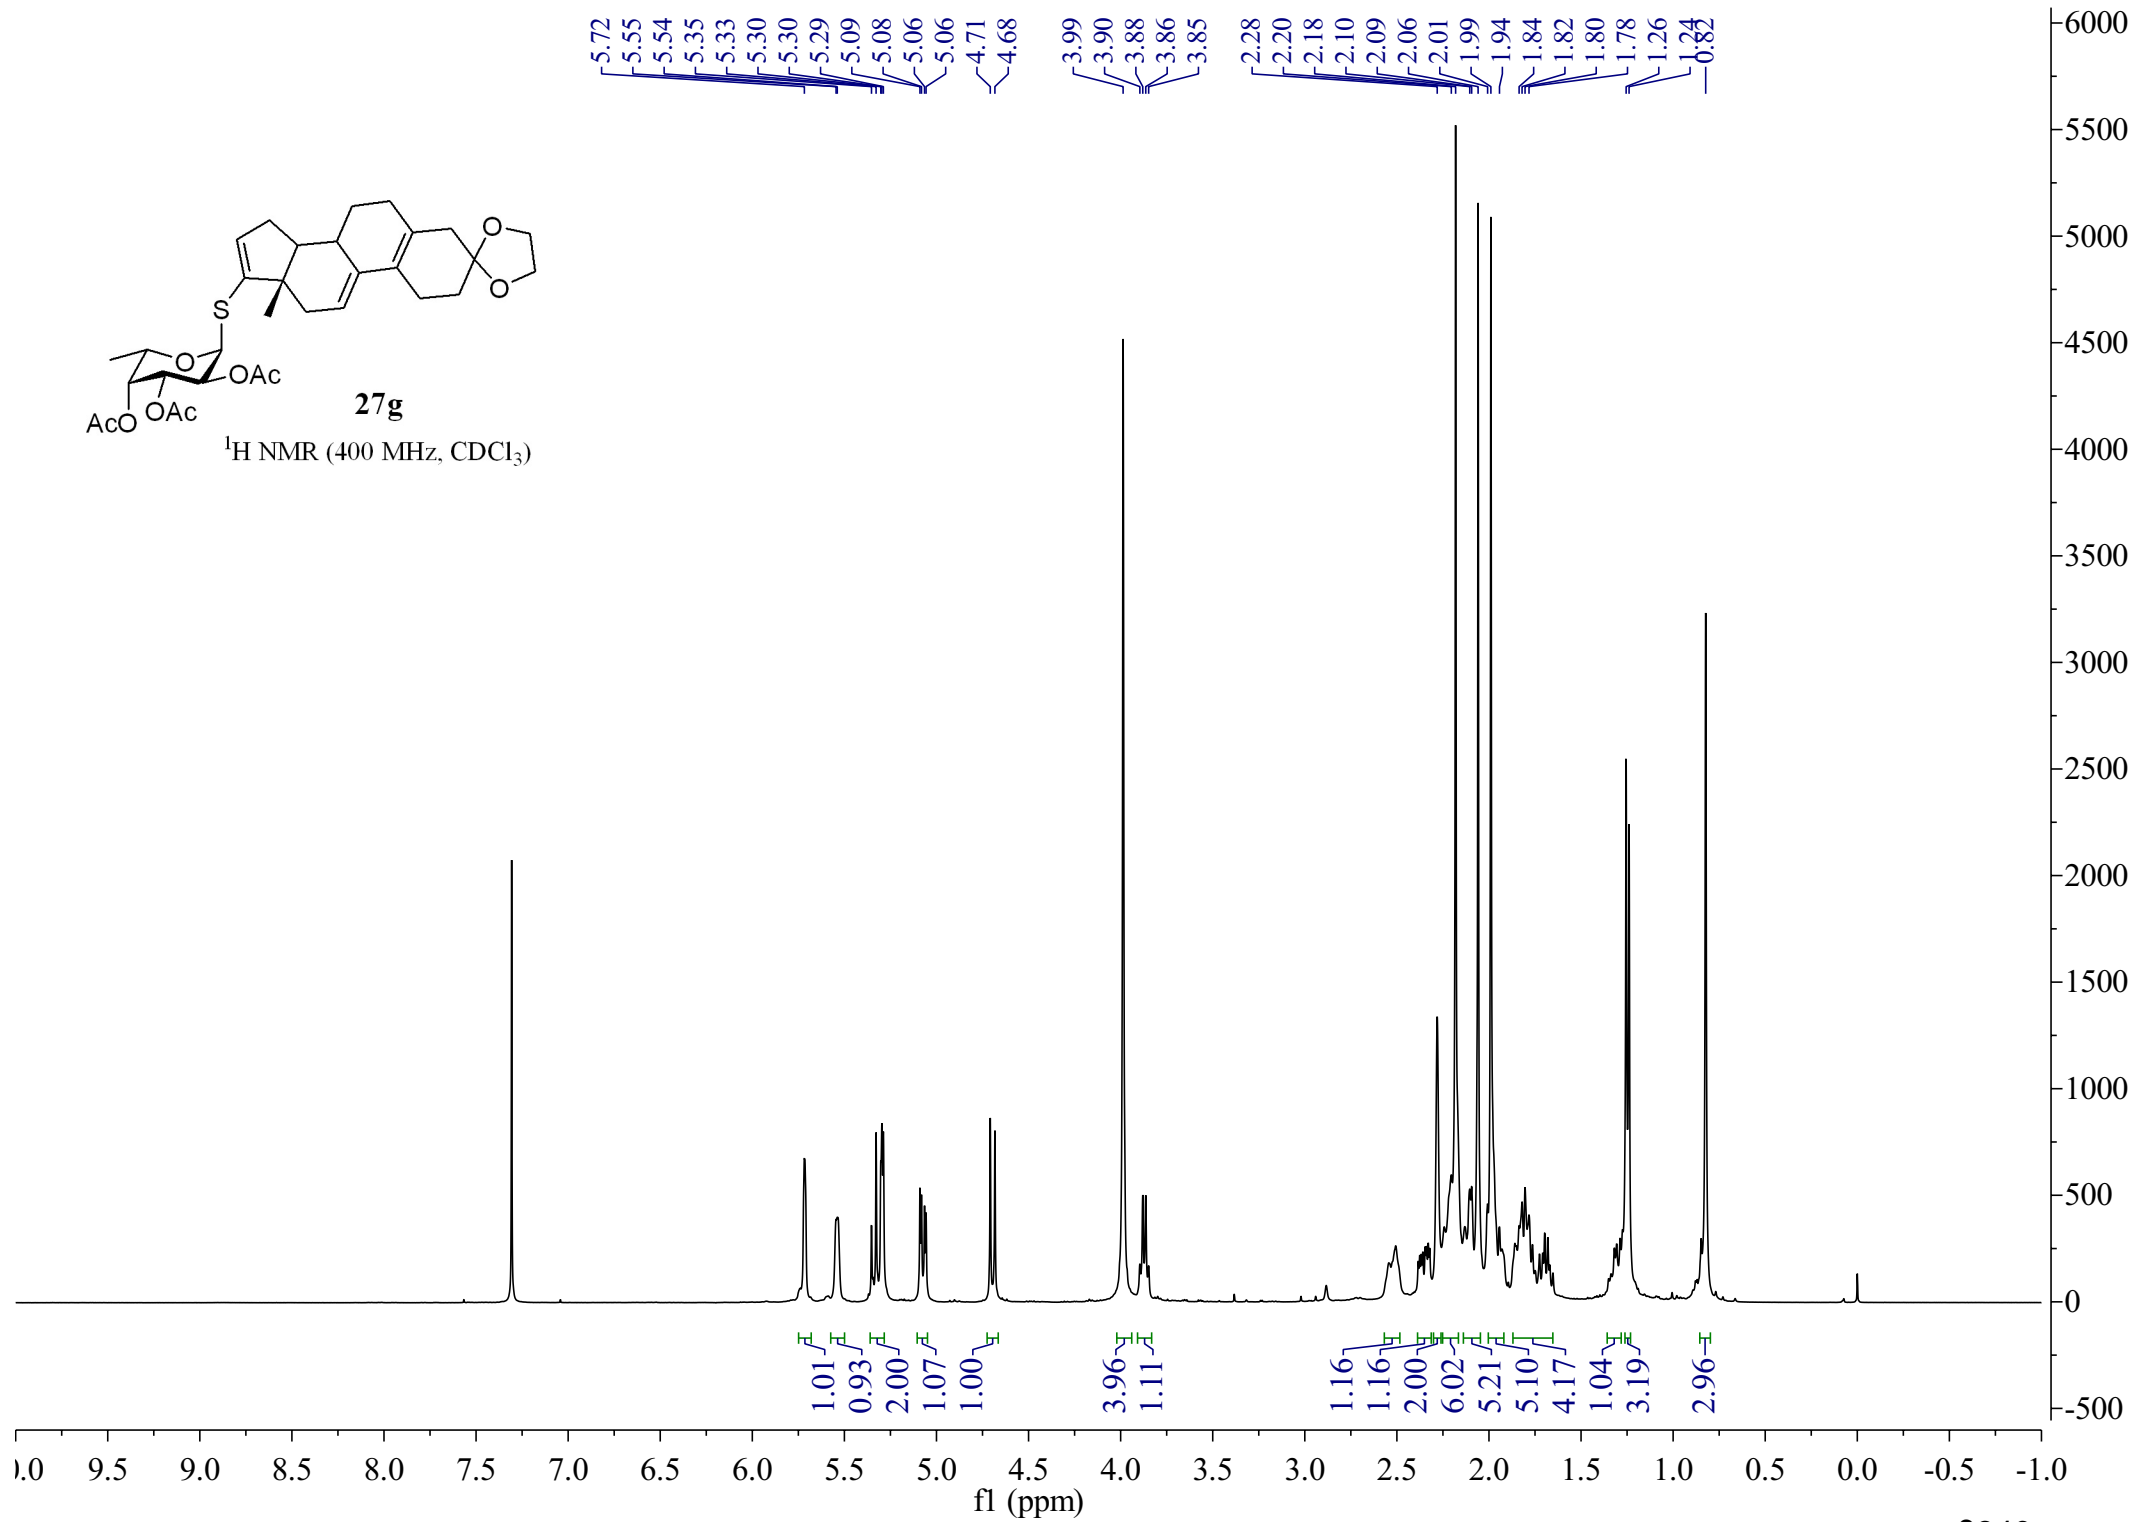

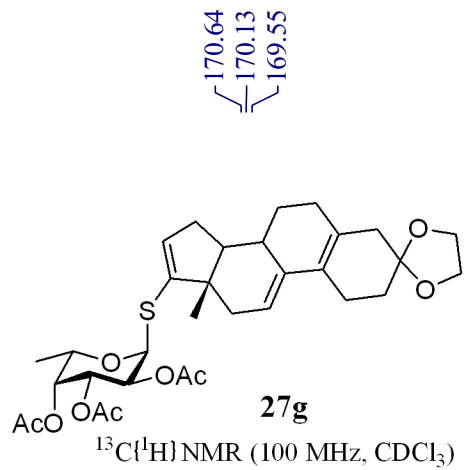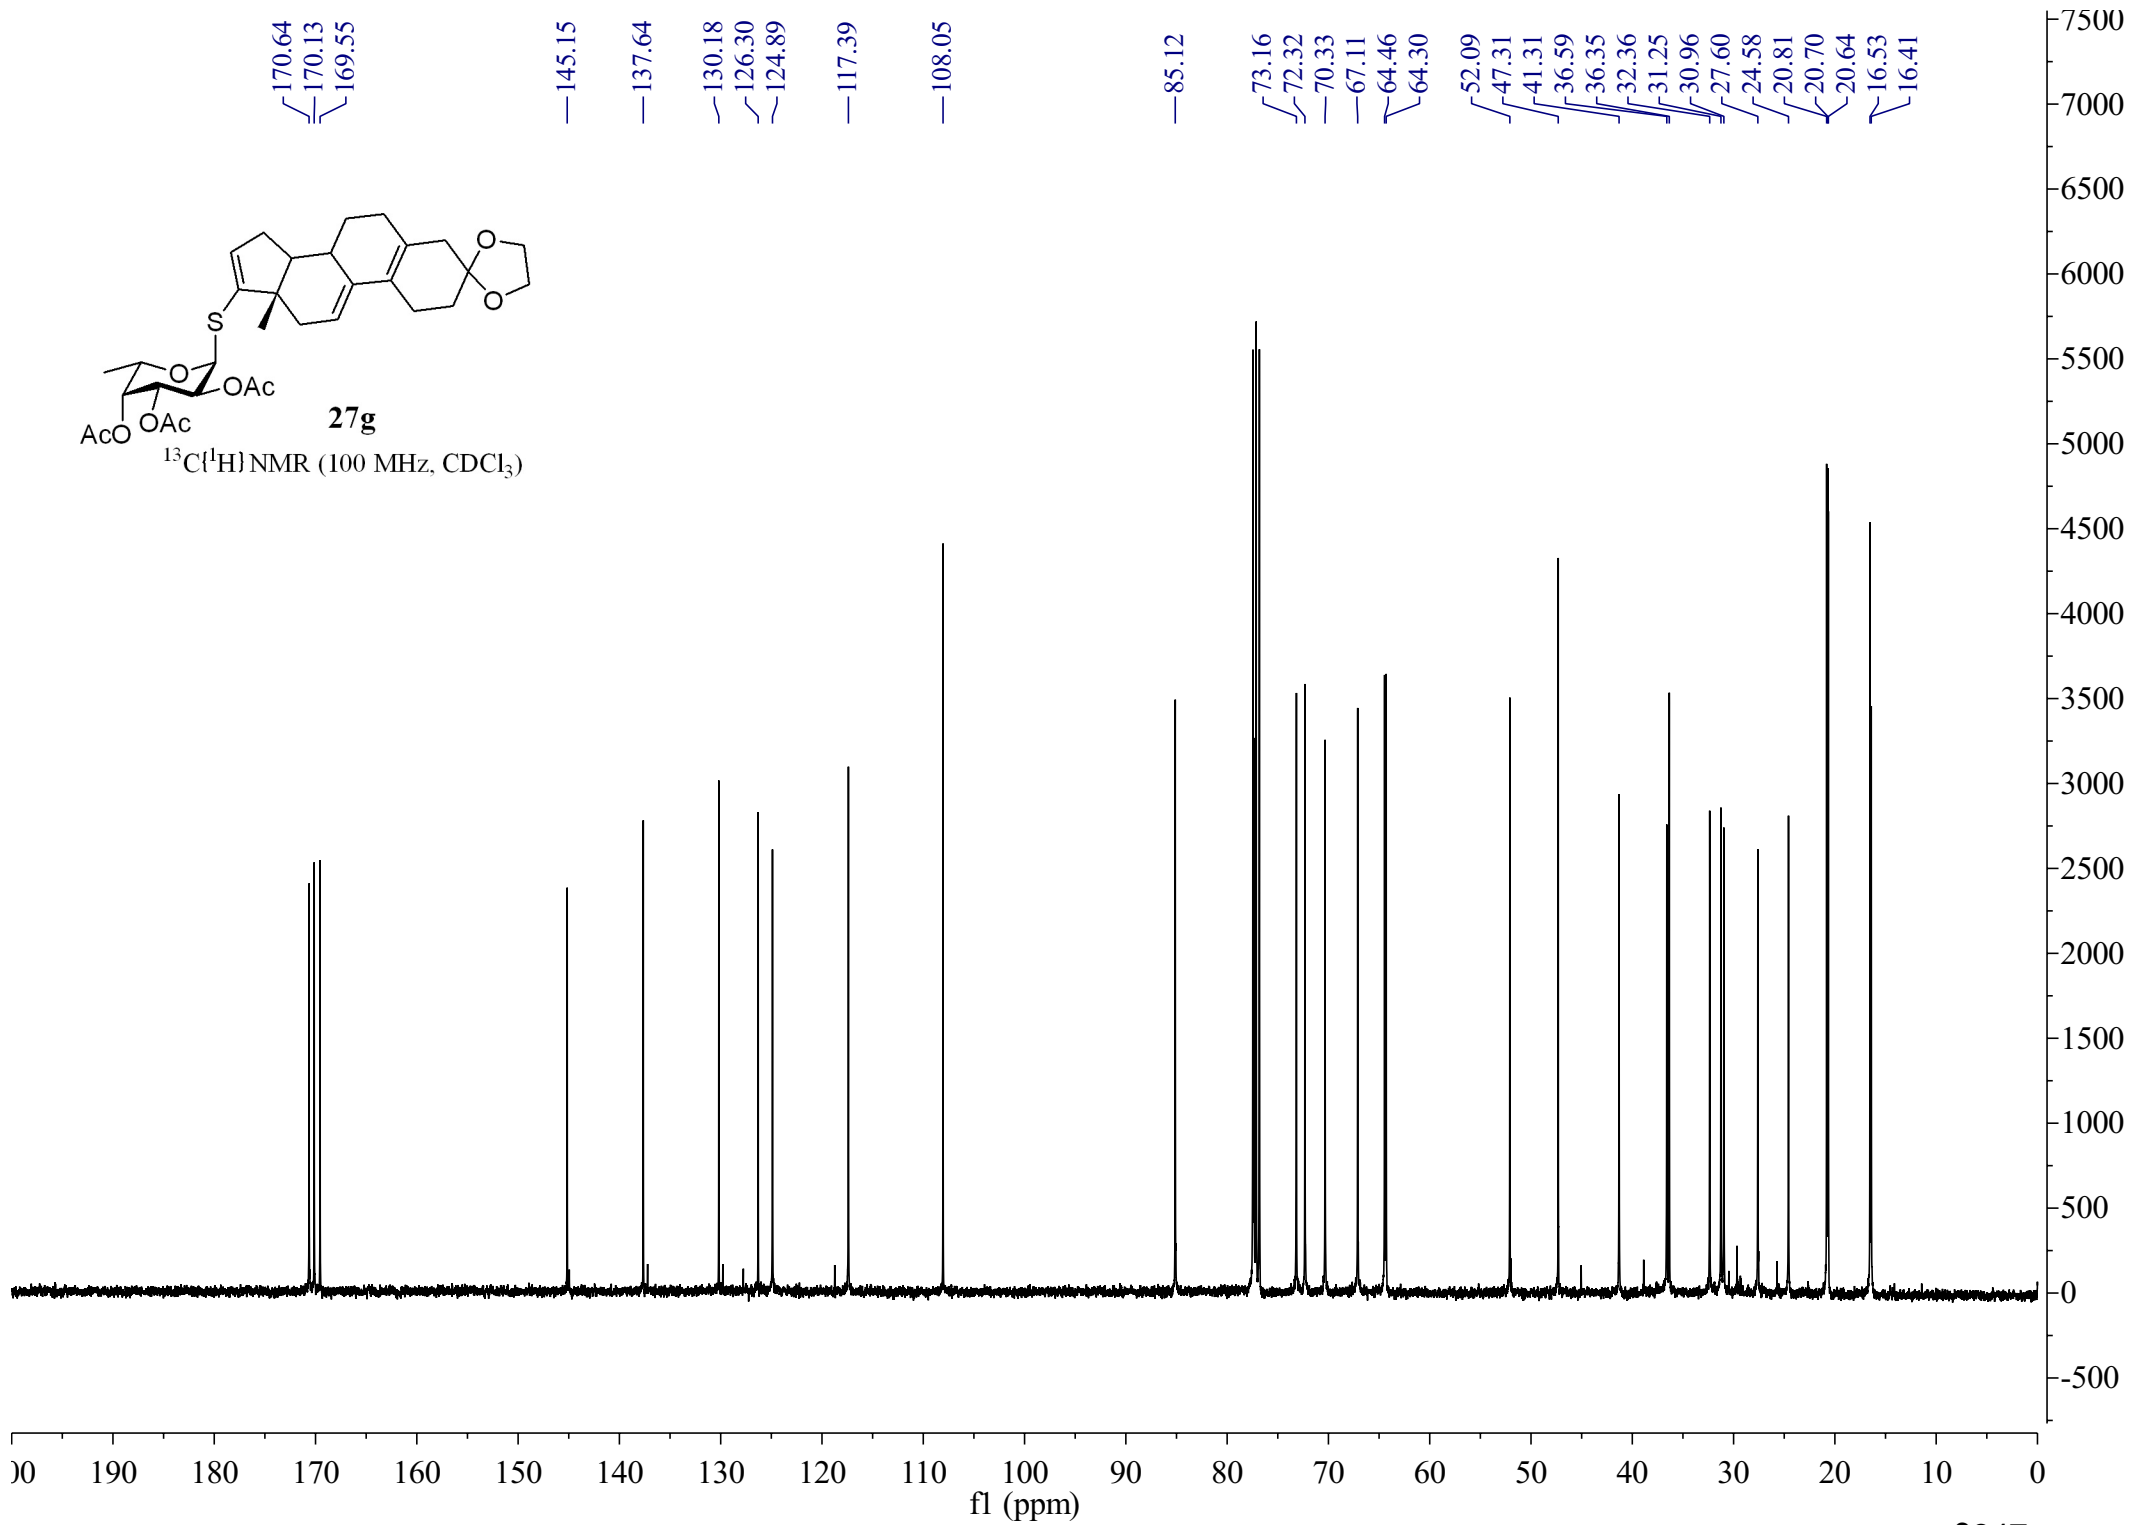

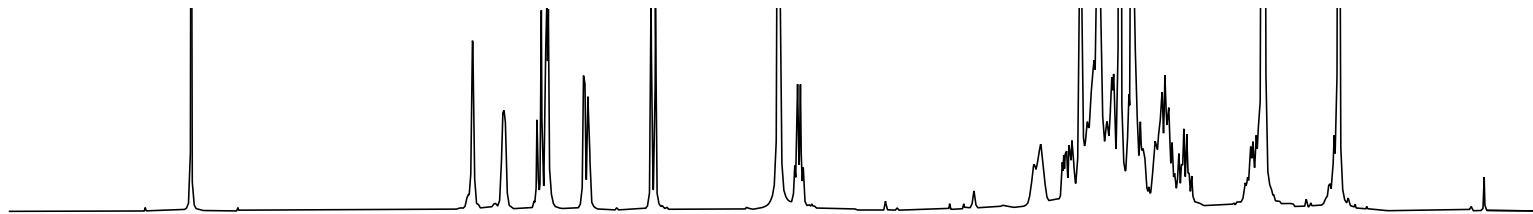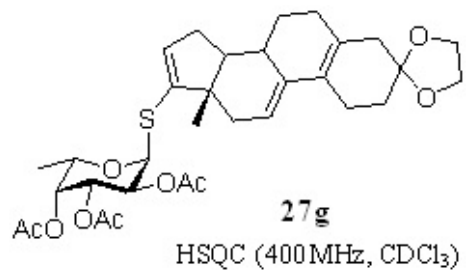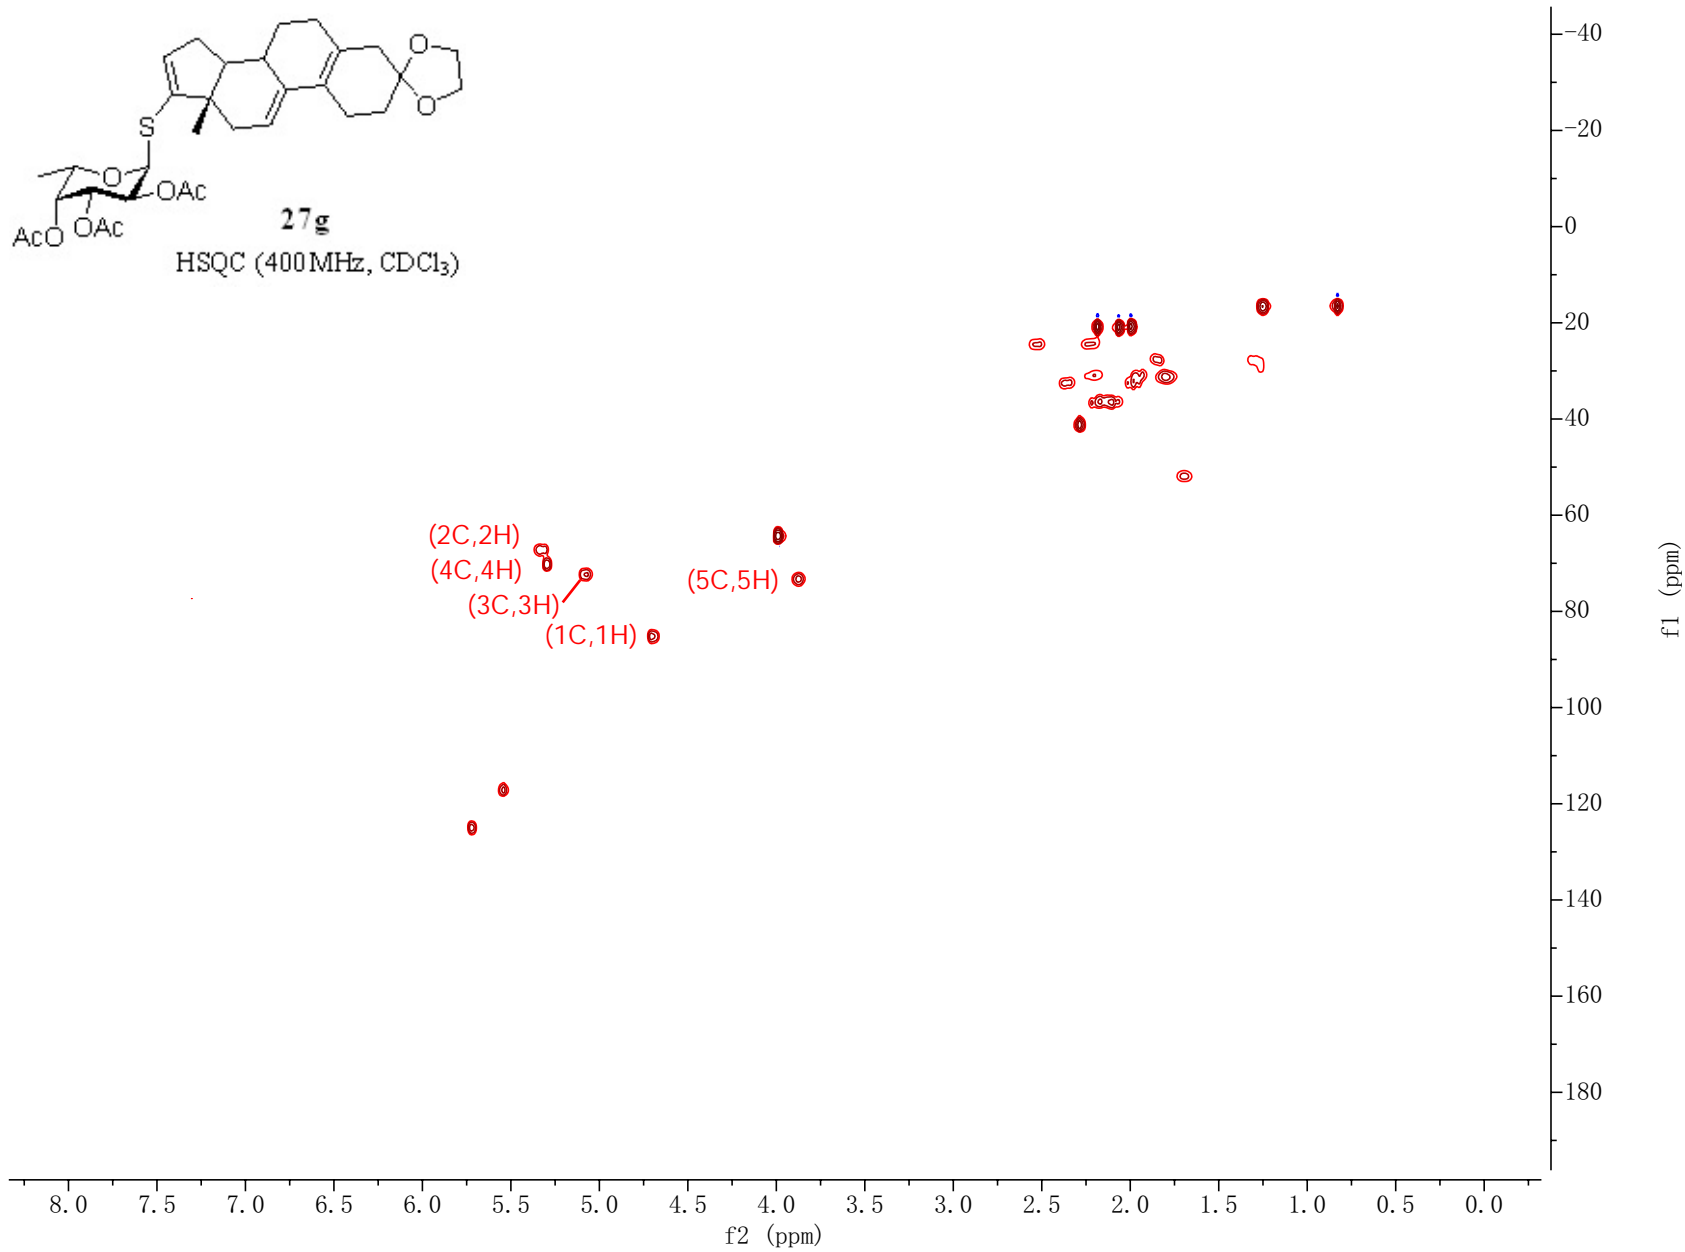

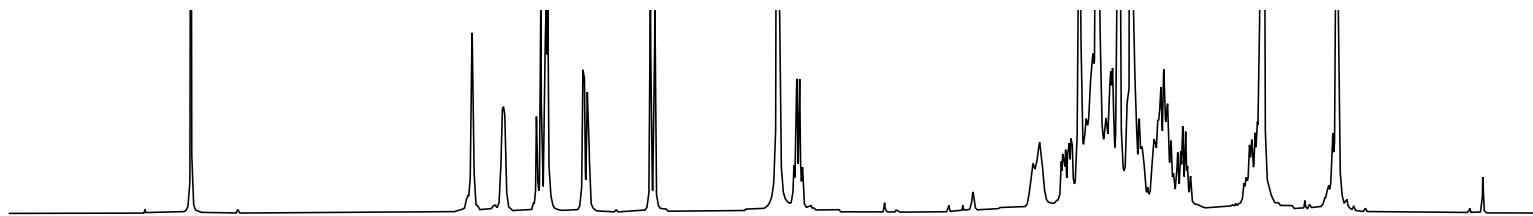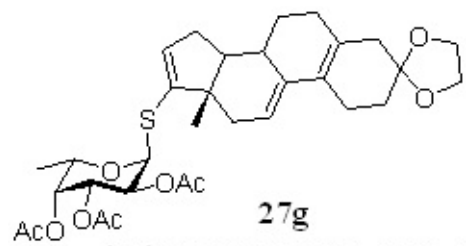

<sup>1</sup>H-<sup>1</sup>H COSY (400 MHz, CDCl<sub>3</sub>)

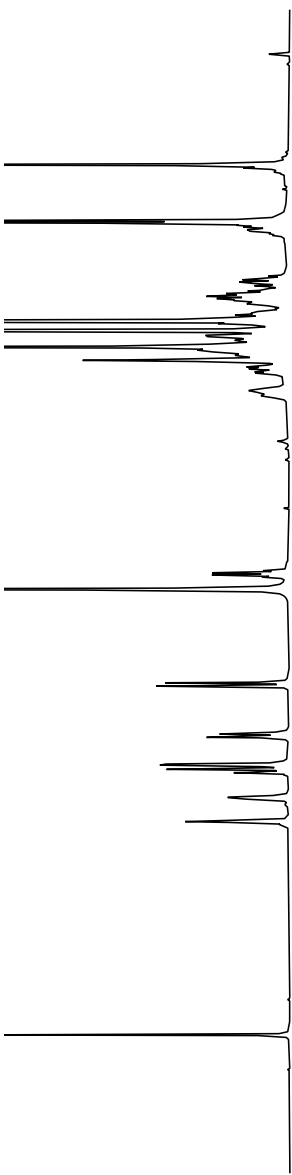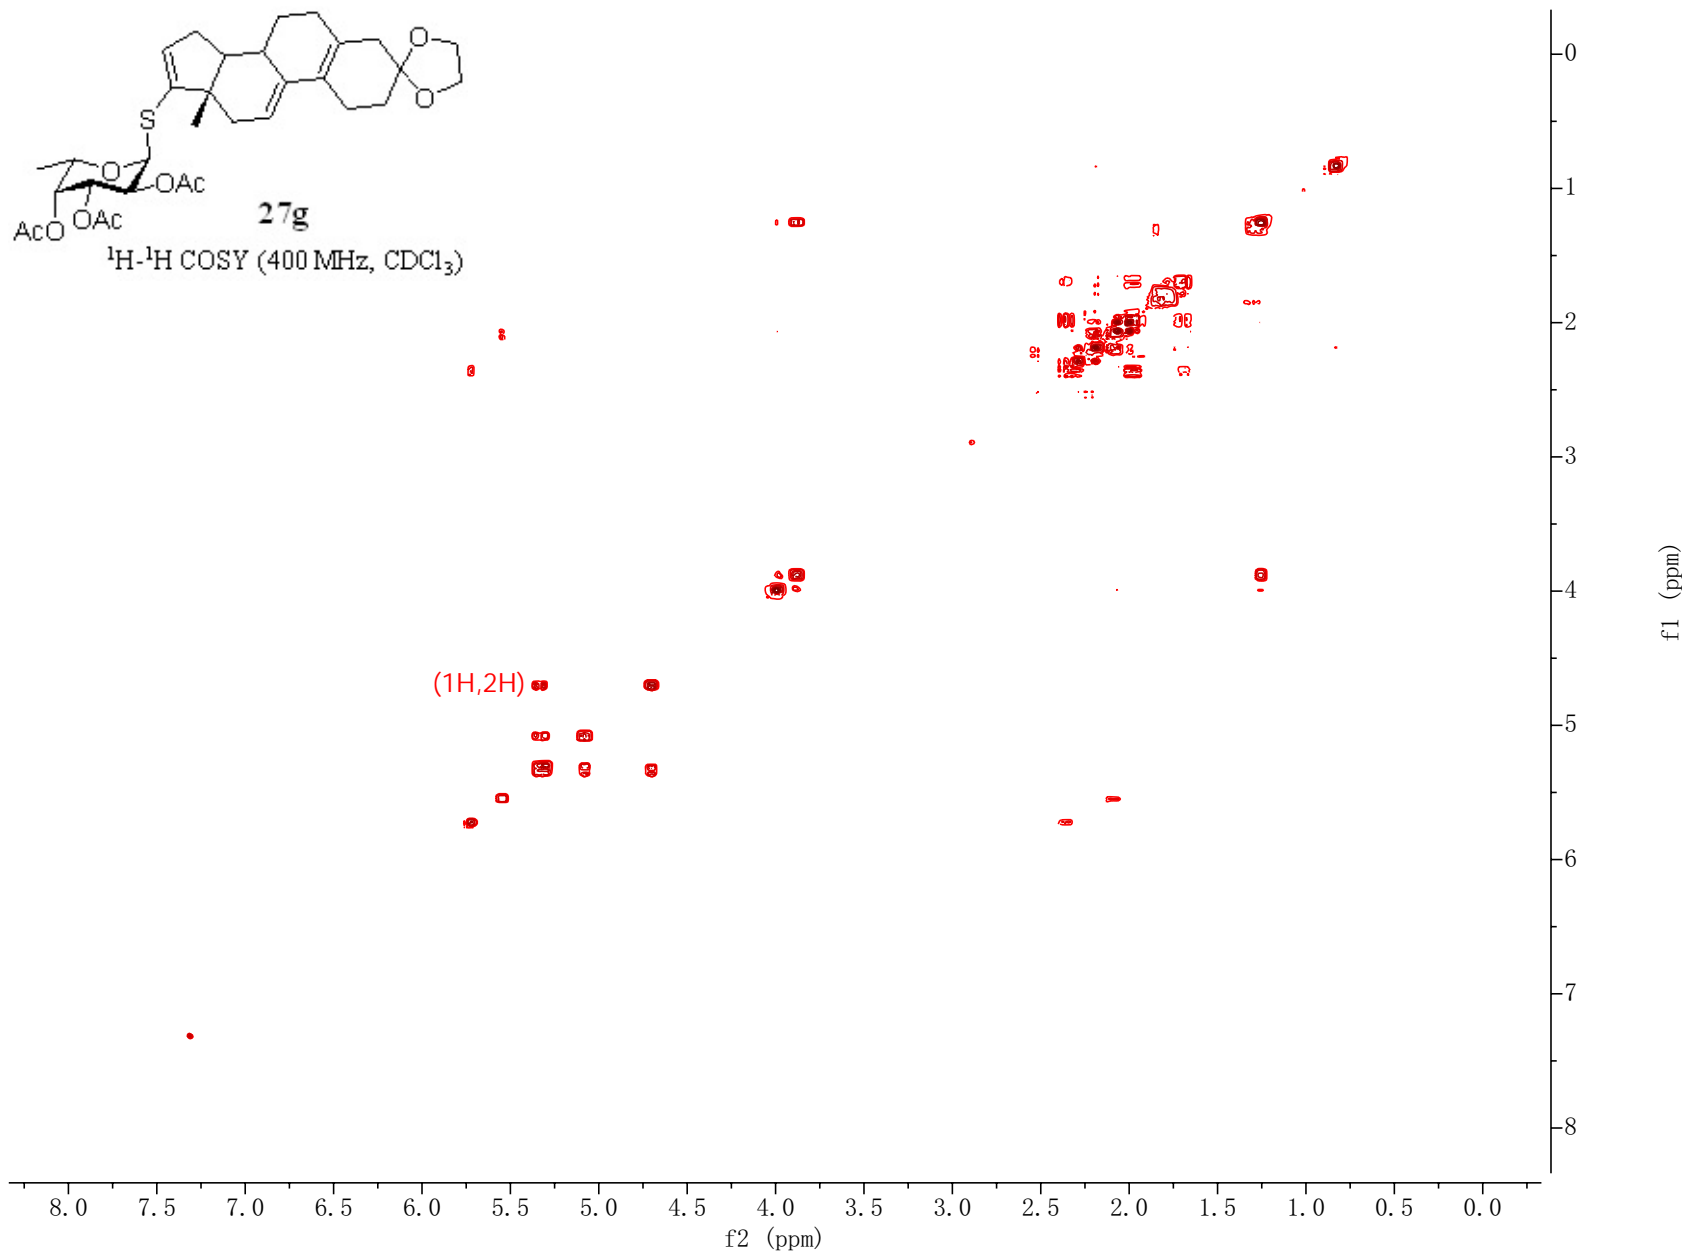



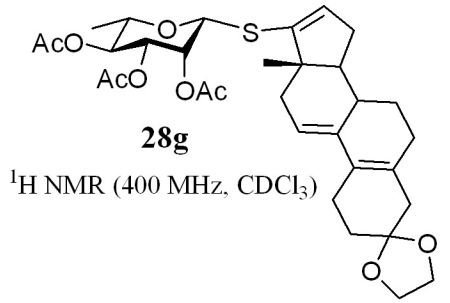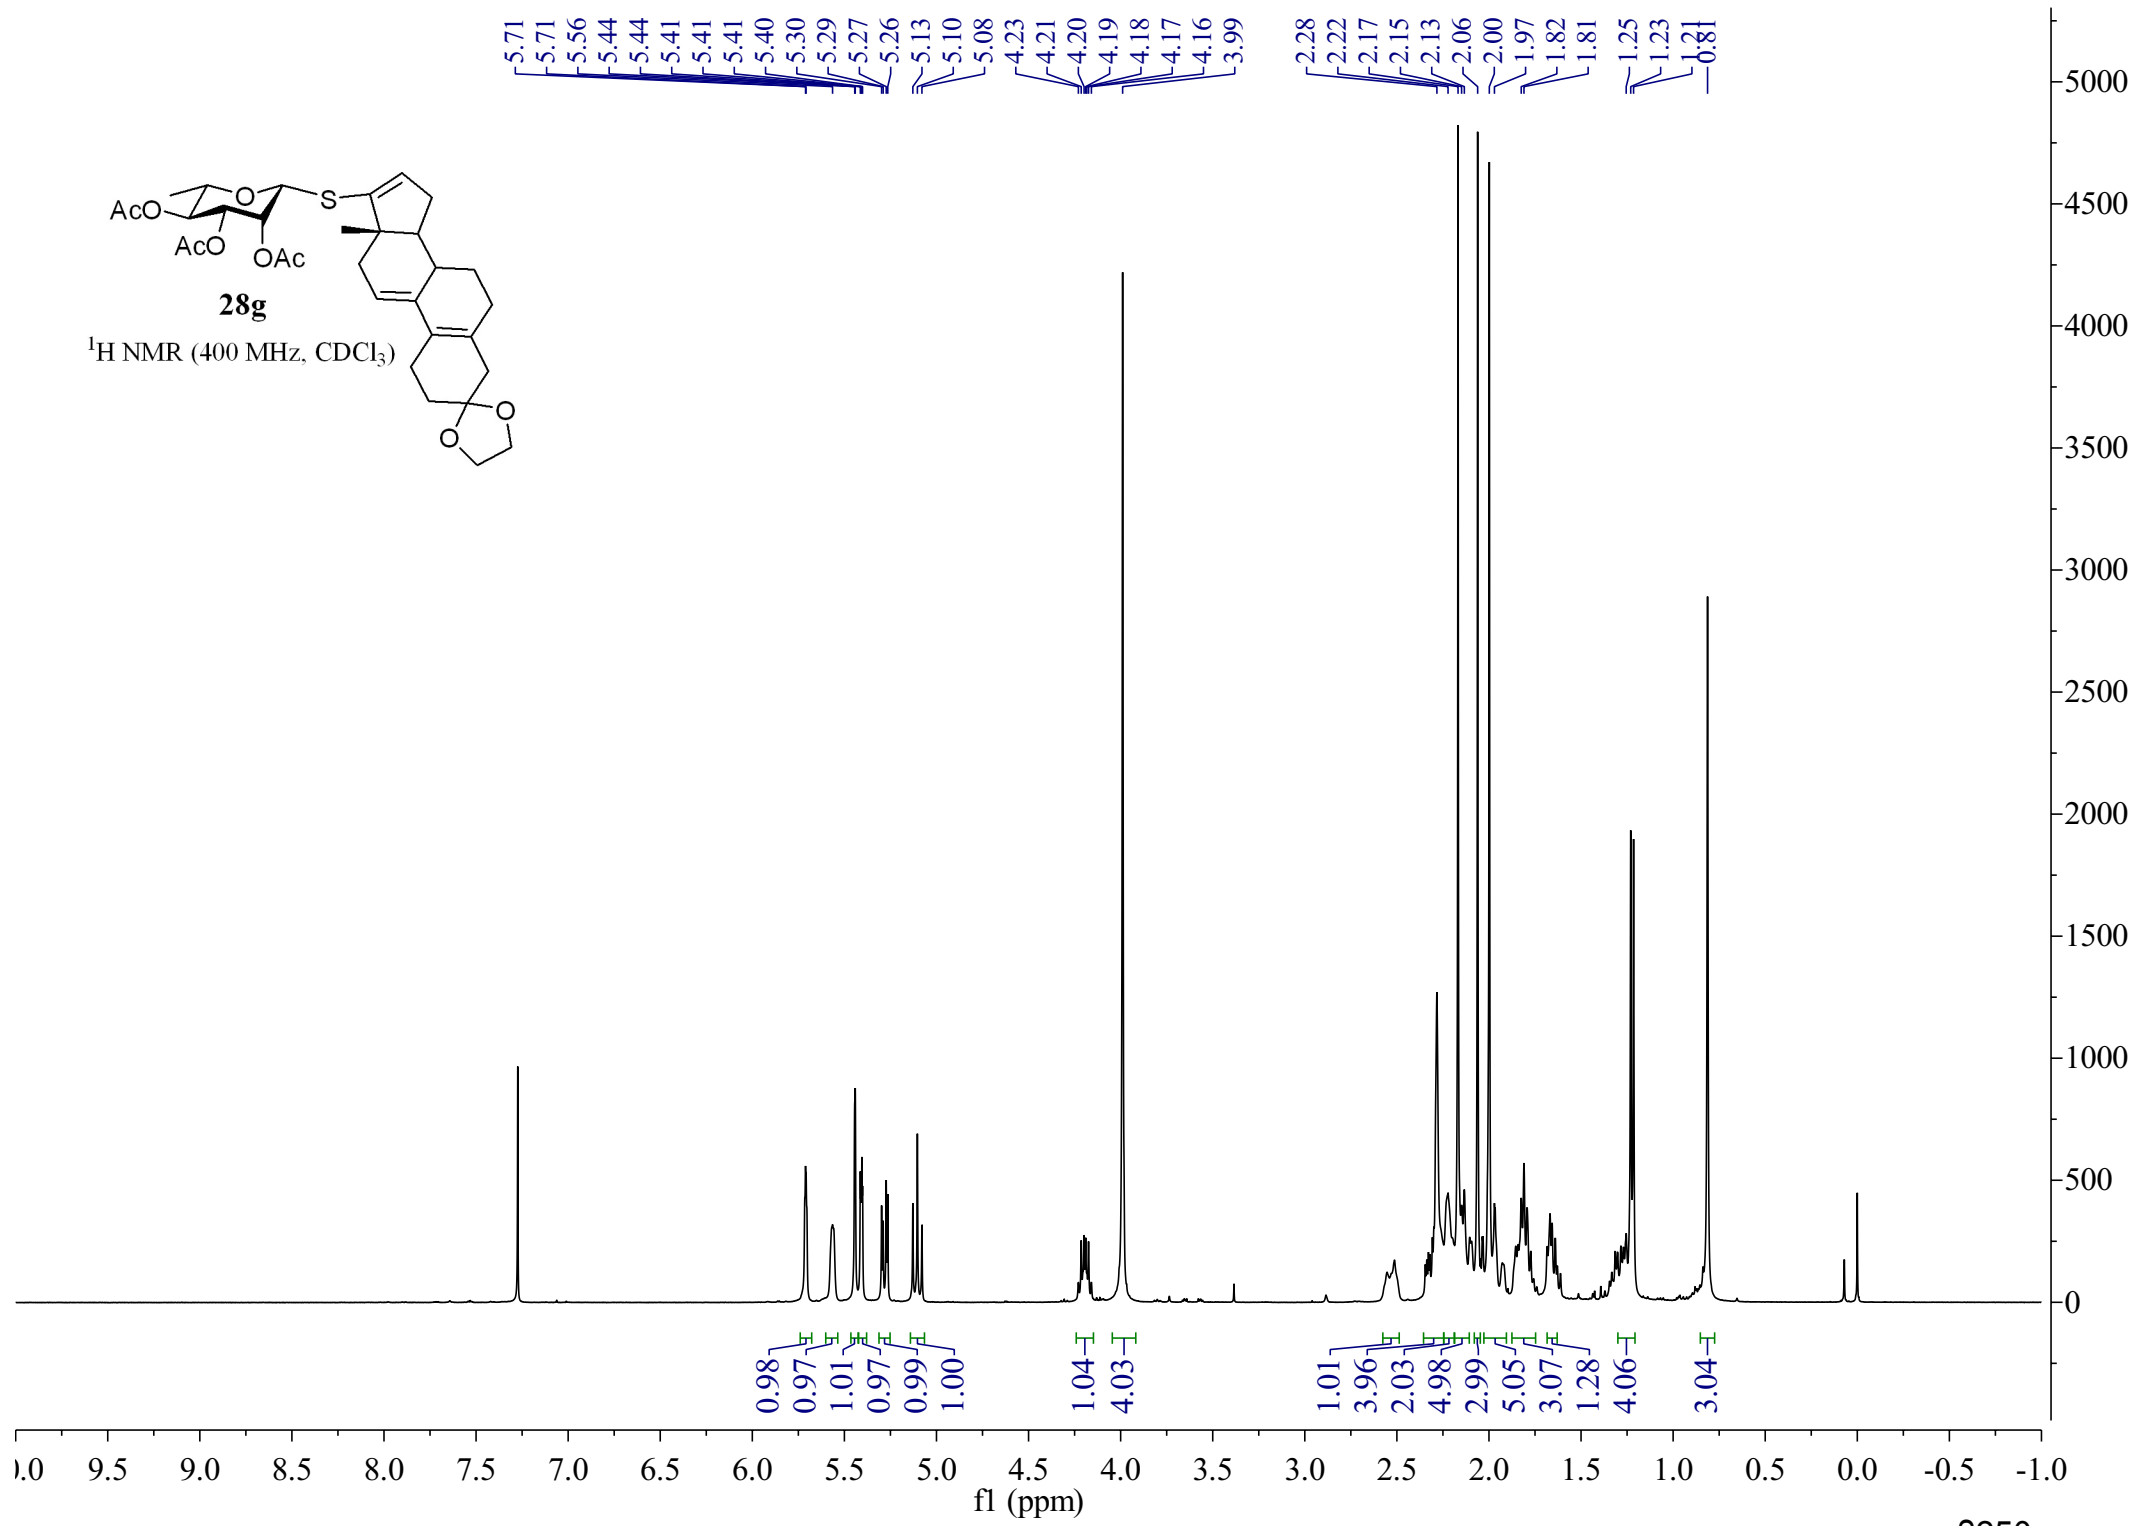

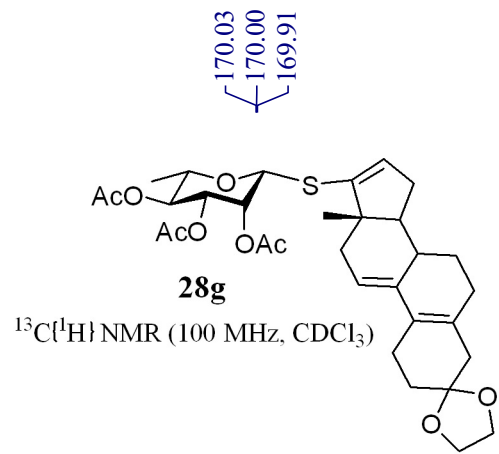

170.03  
170.00  
169.91

143.86

137.69

130.20

126.47

126.34

117.51

108.09

82.42

71.42

71.25

69.41

67.73

64.48

64.33

52.11

47.54

41.33

37.10

36.43

32.50

31.28

30.98

27.61

24.62

20.95

20.80

20.68

17.48

16.54

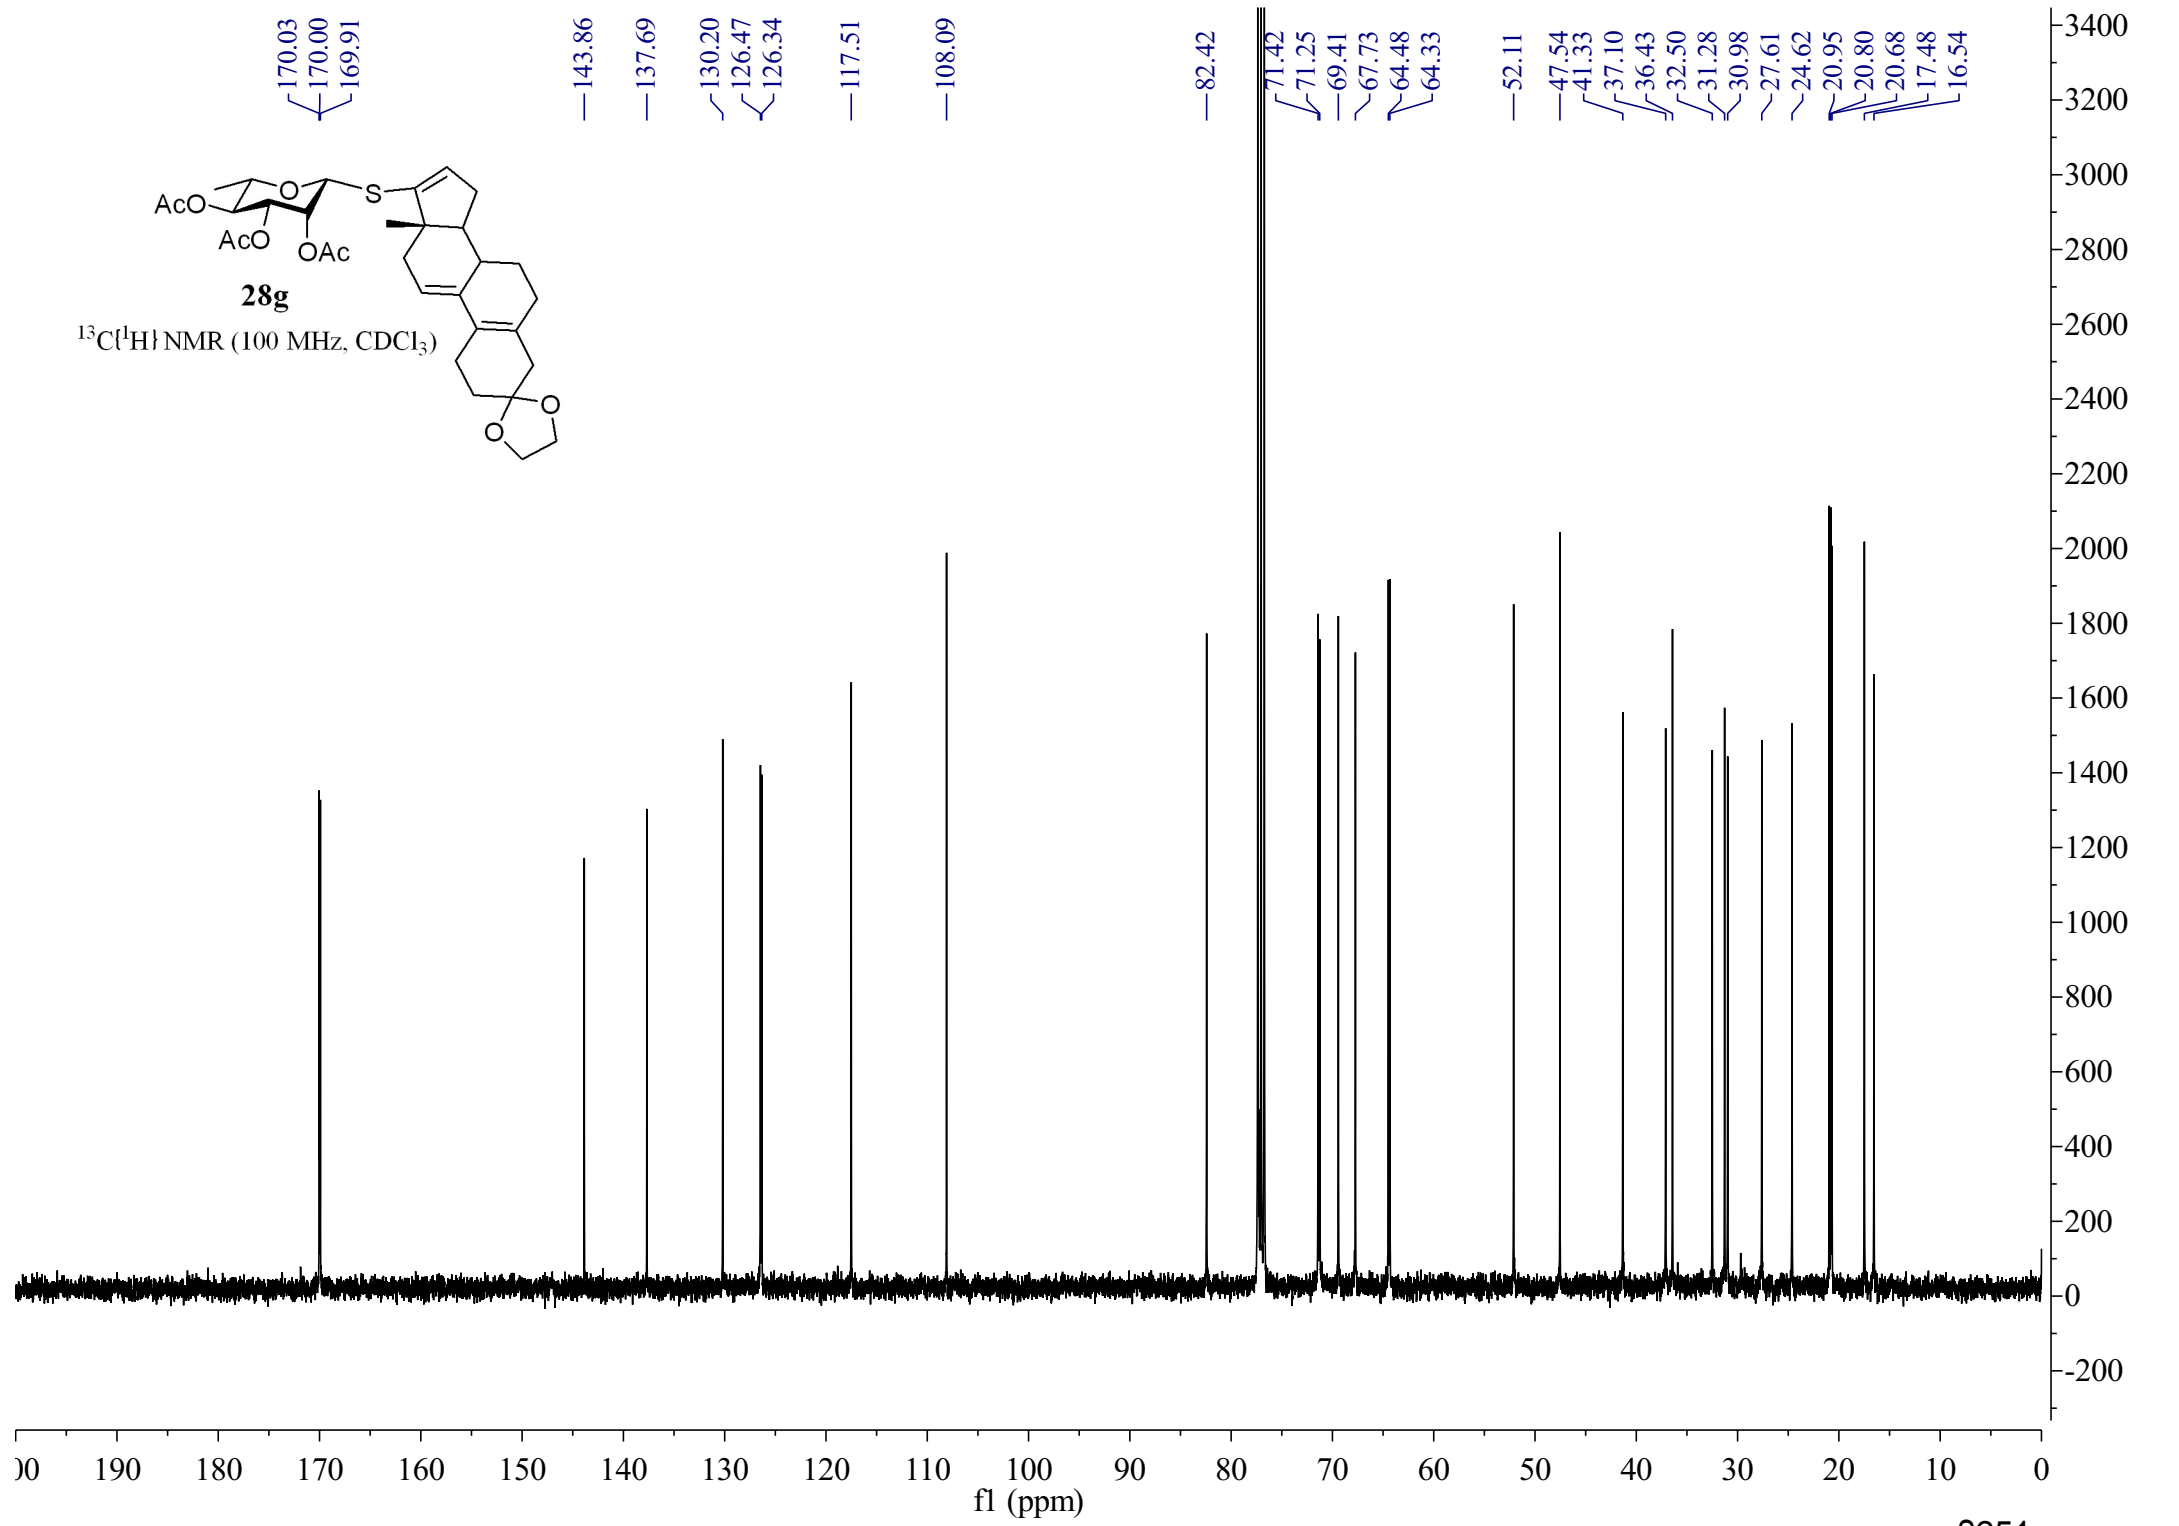

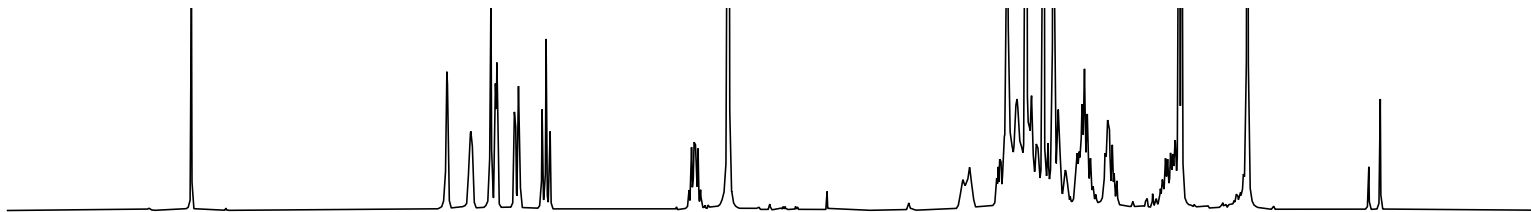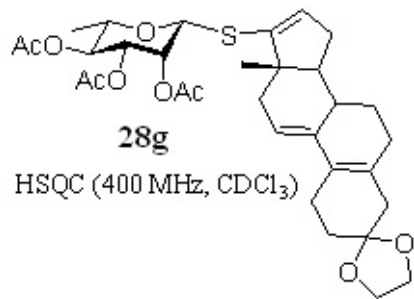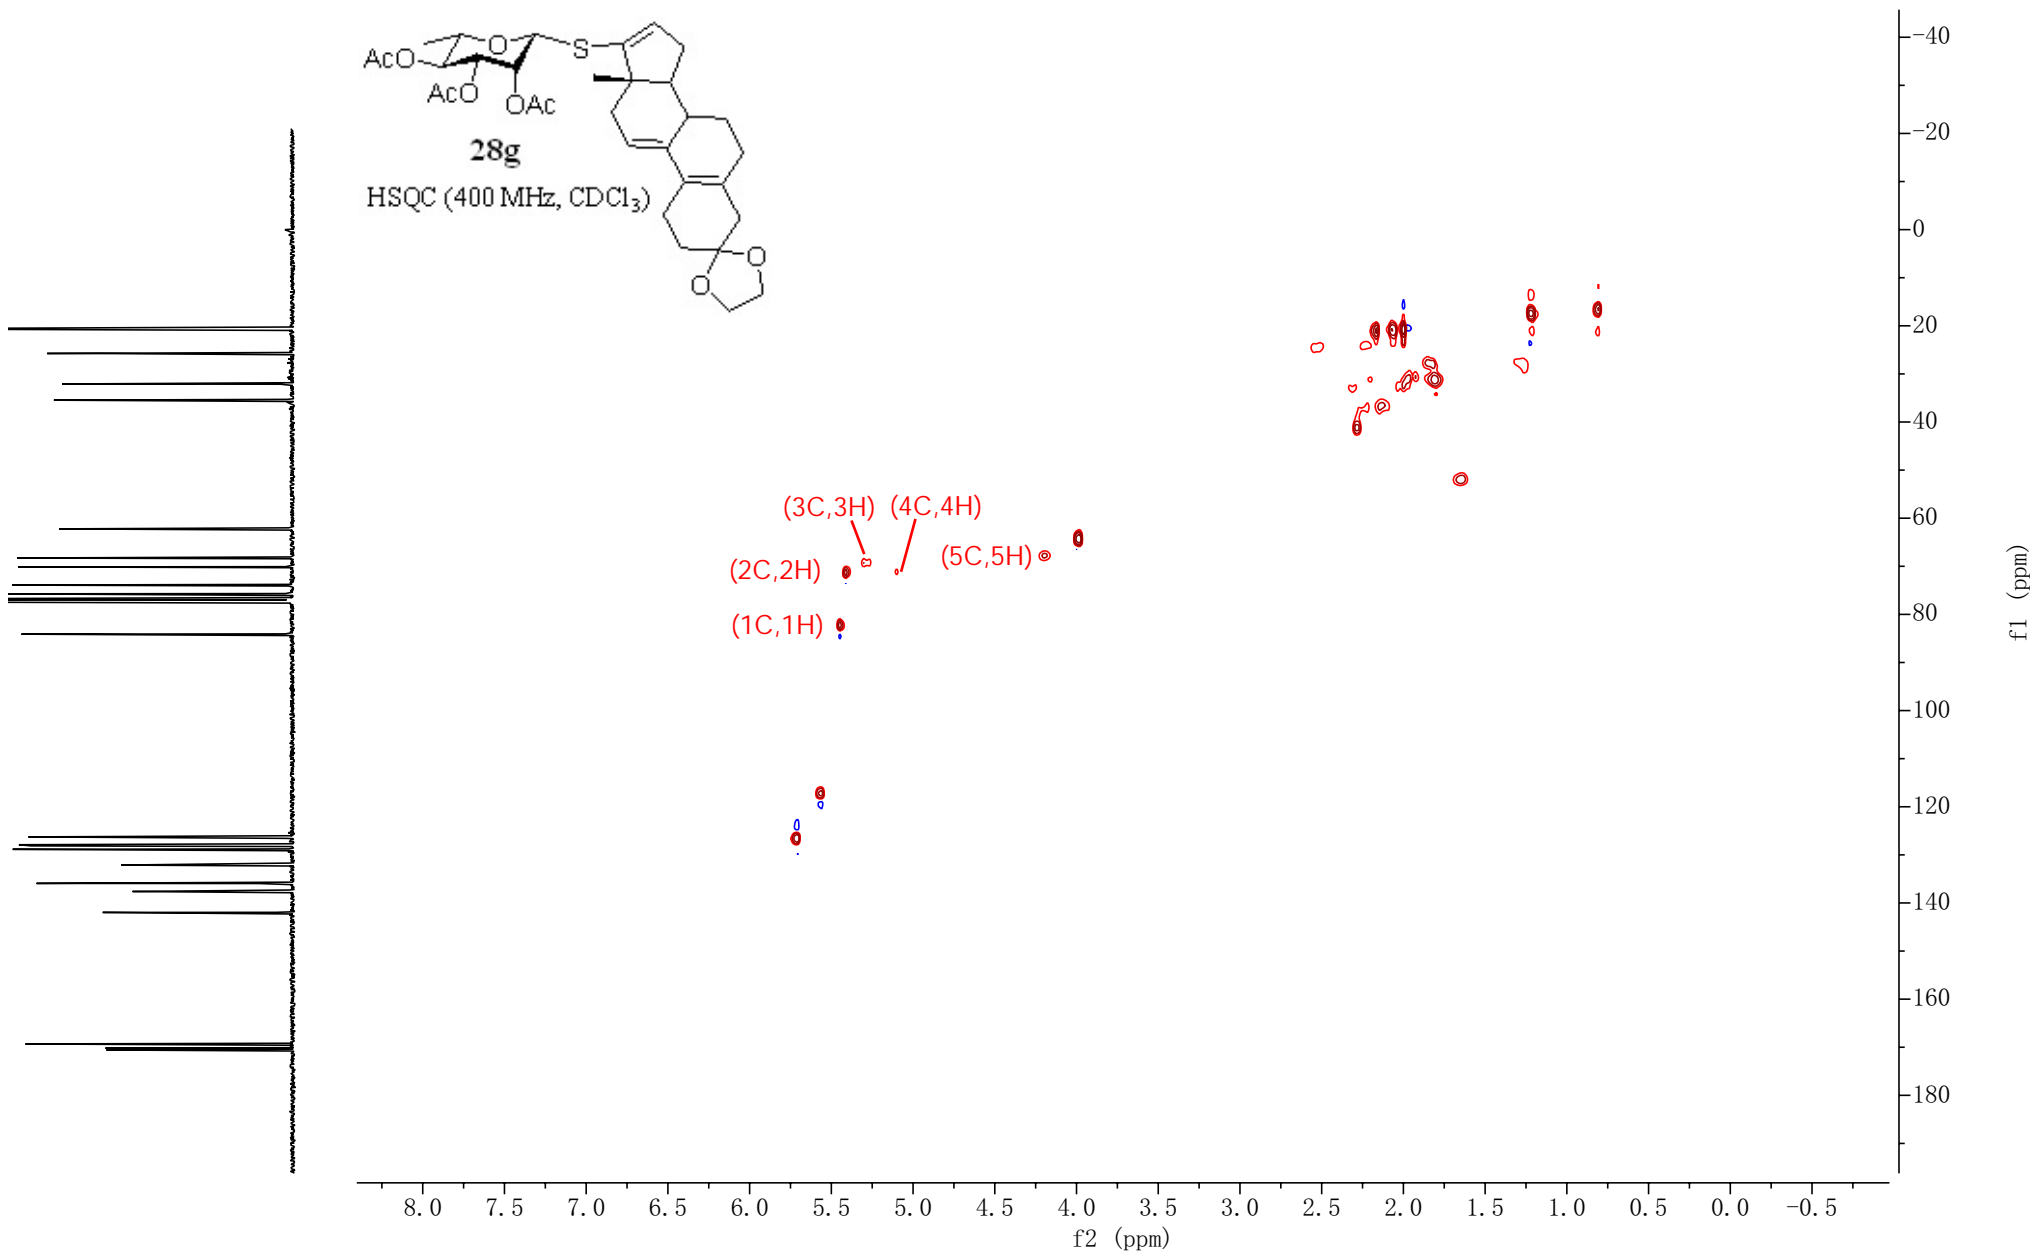

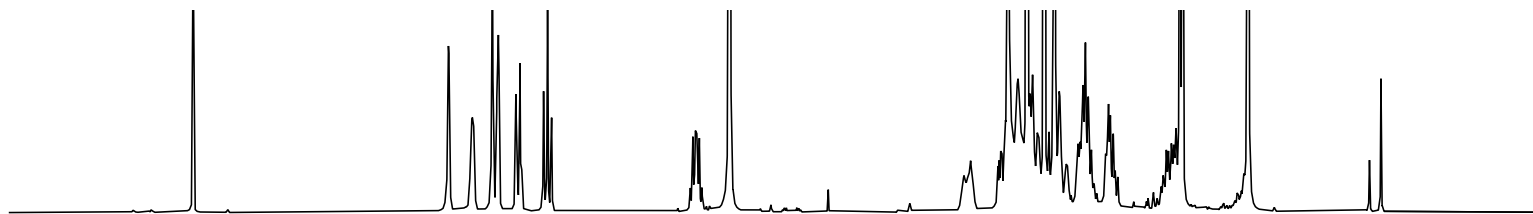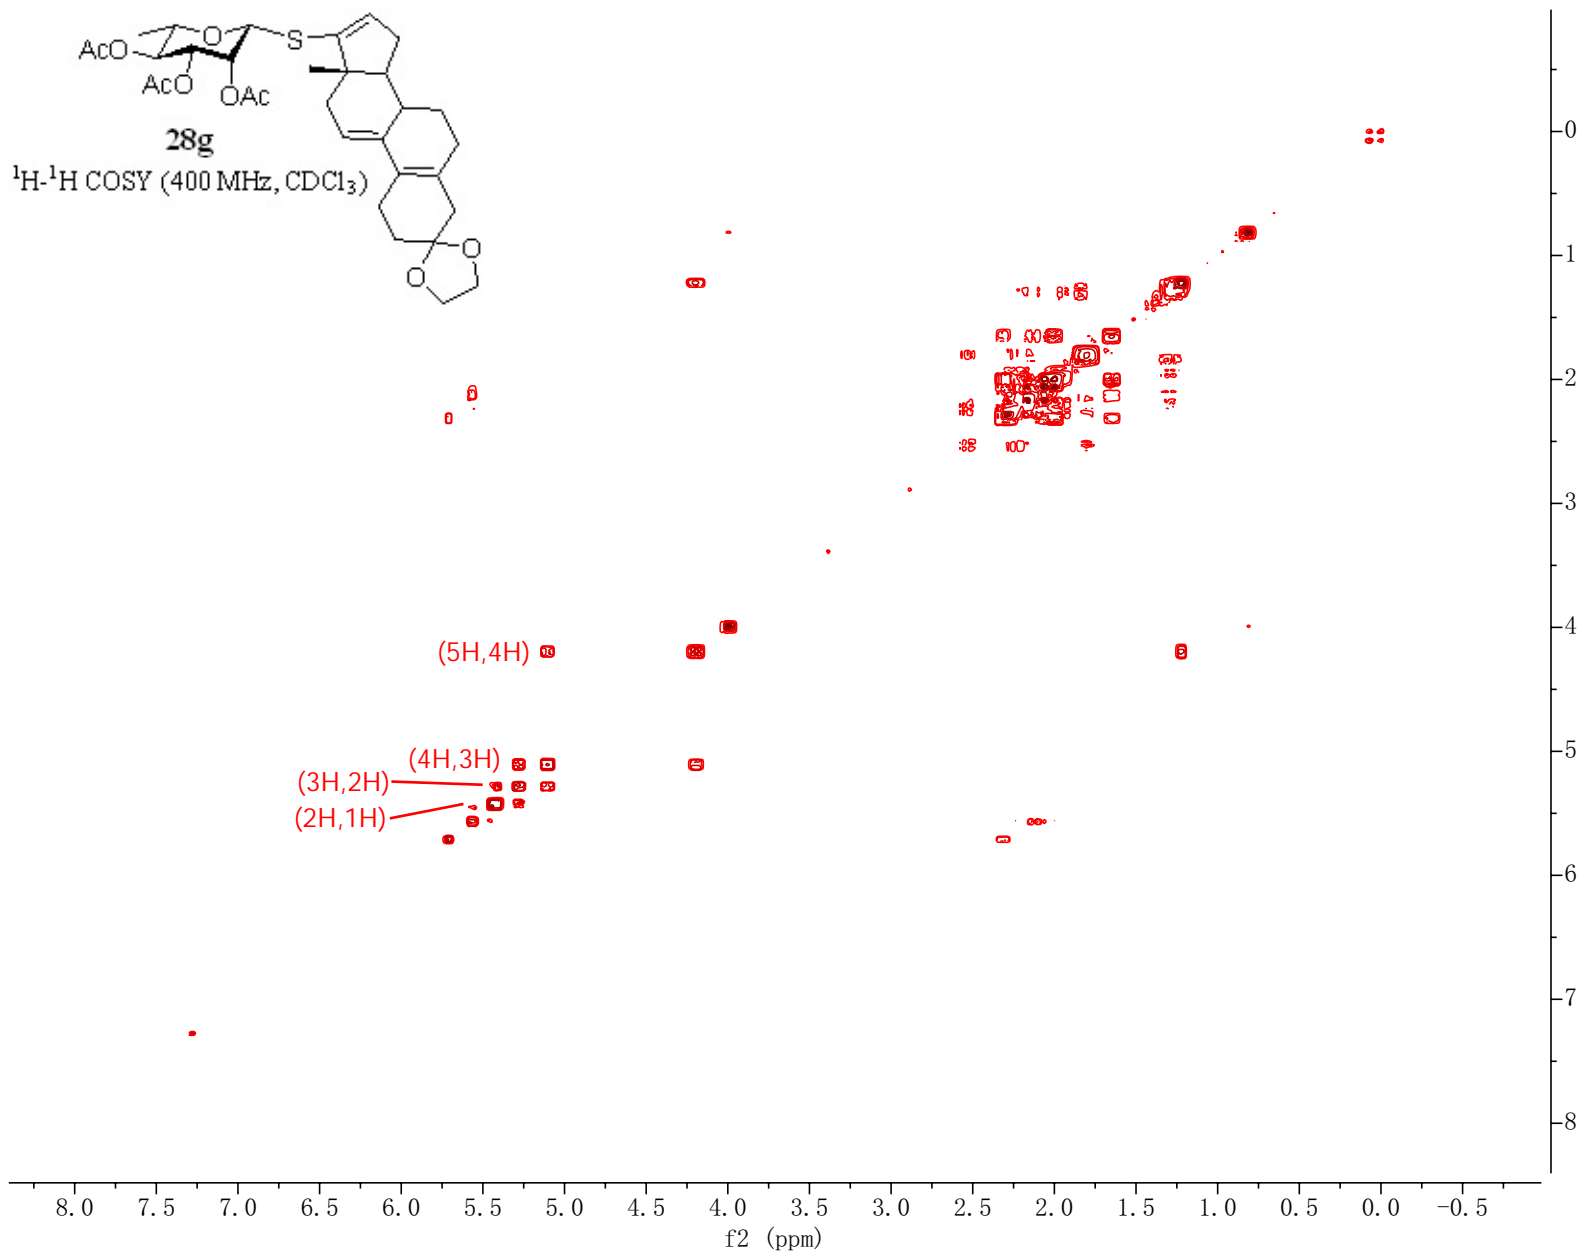

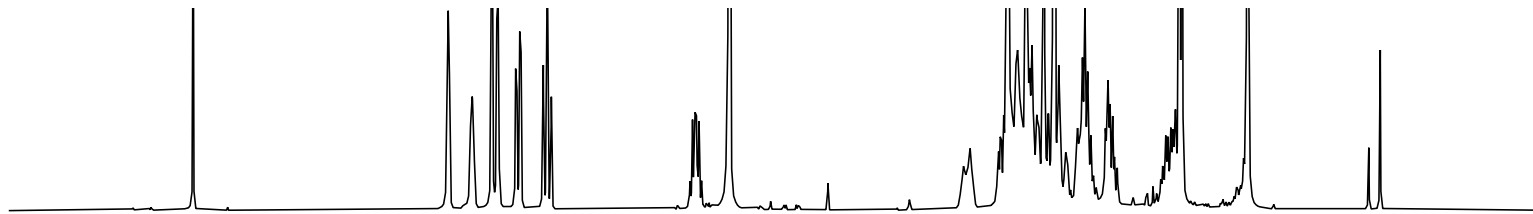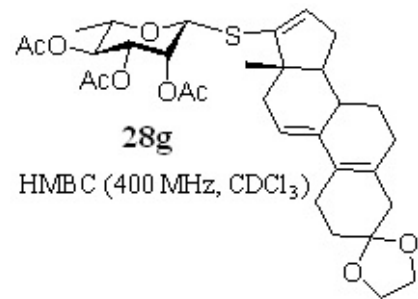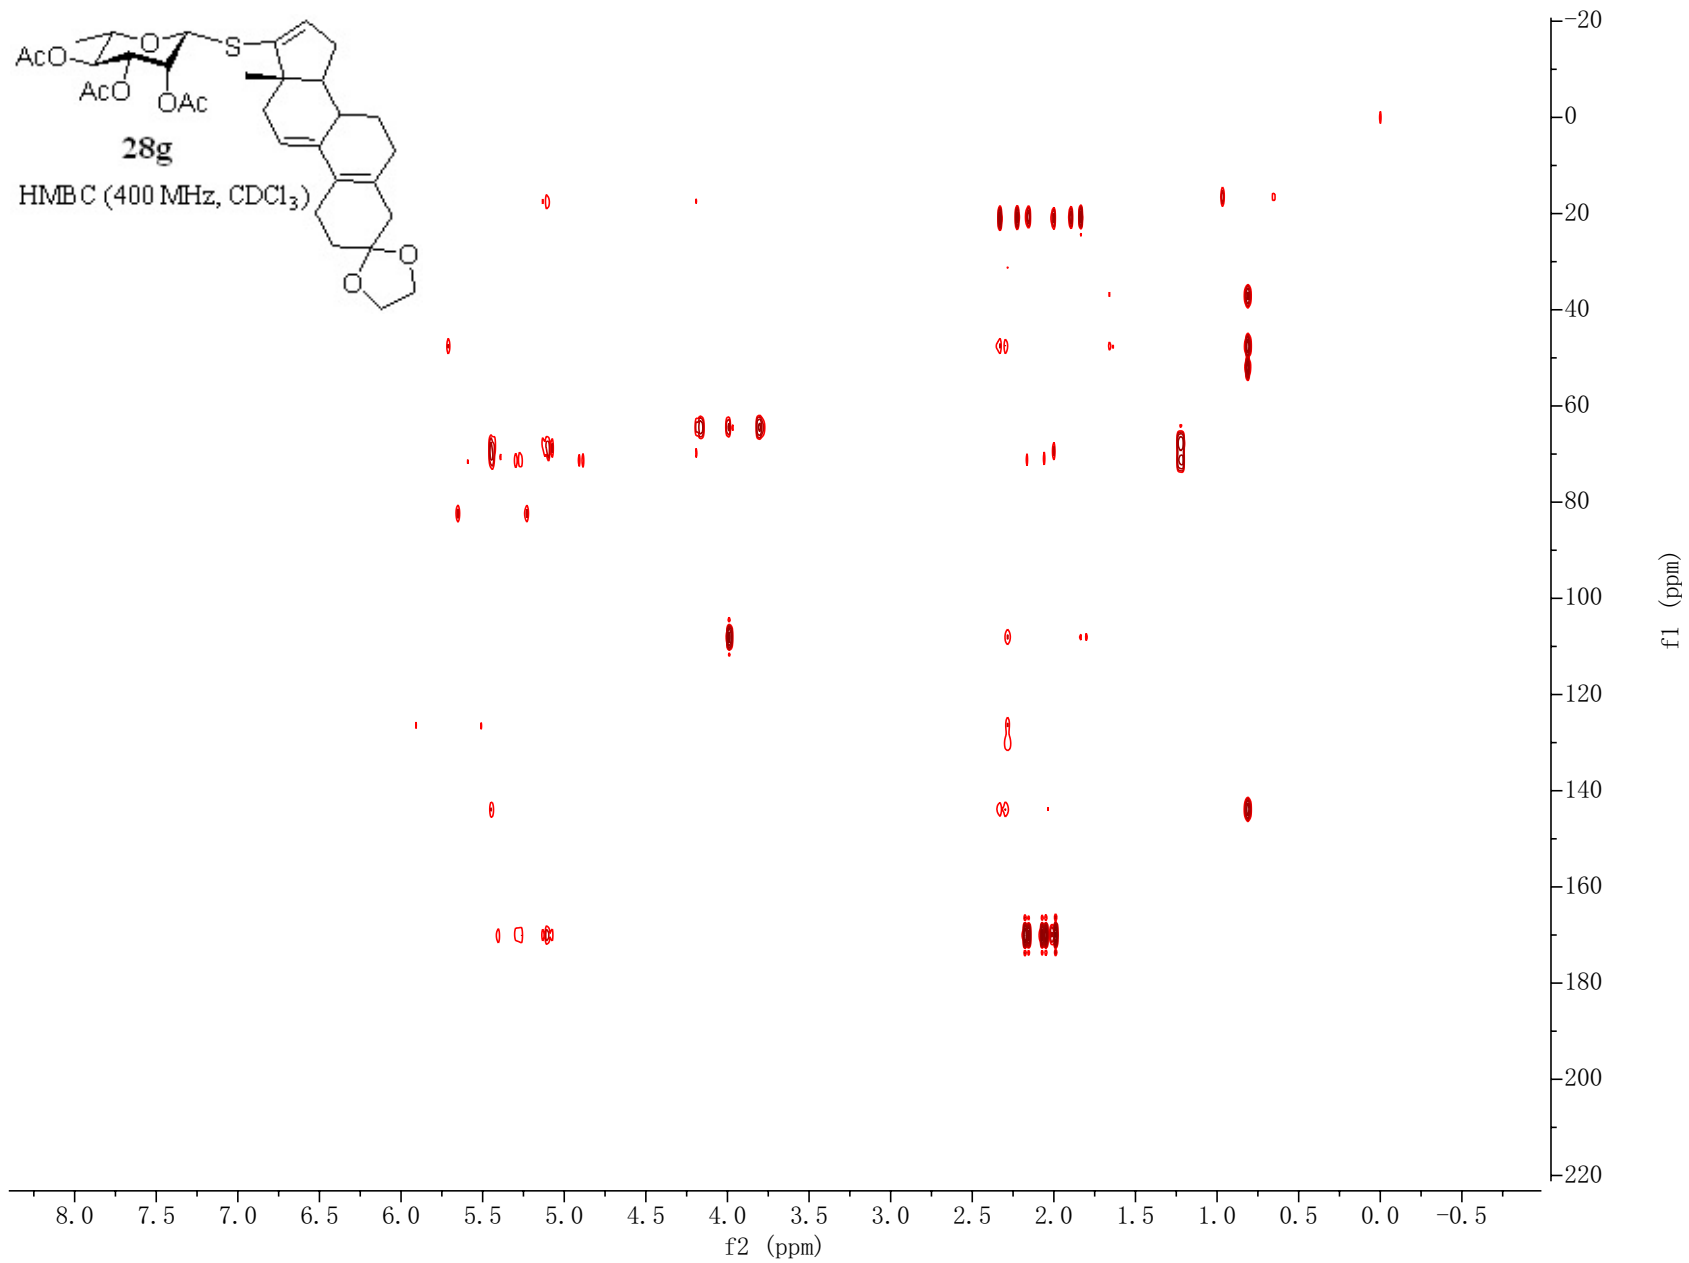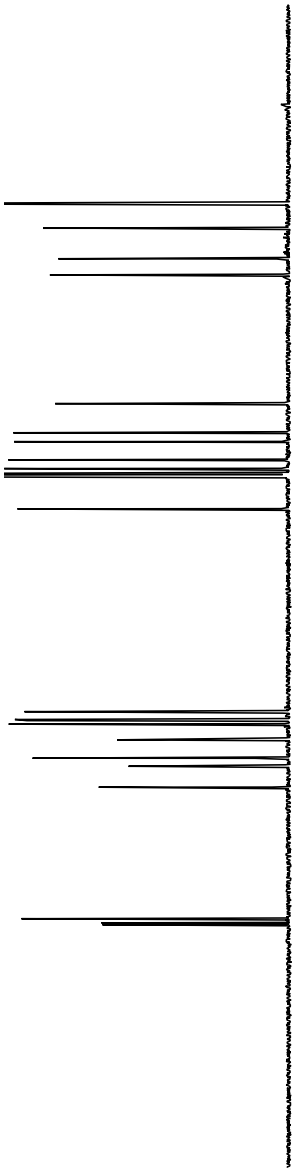

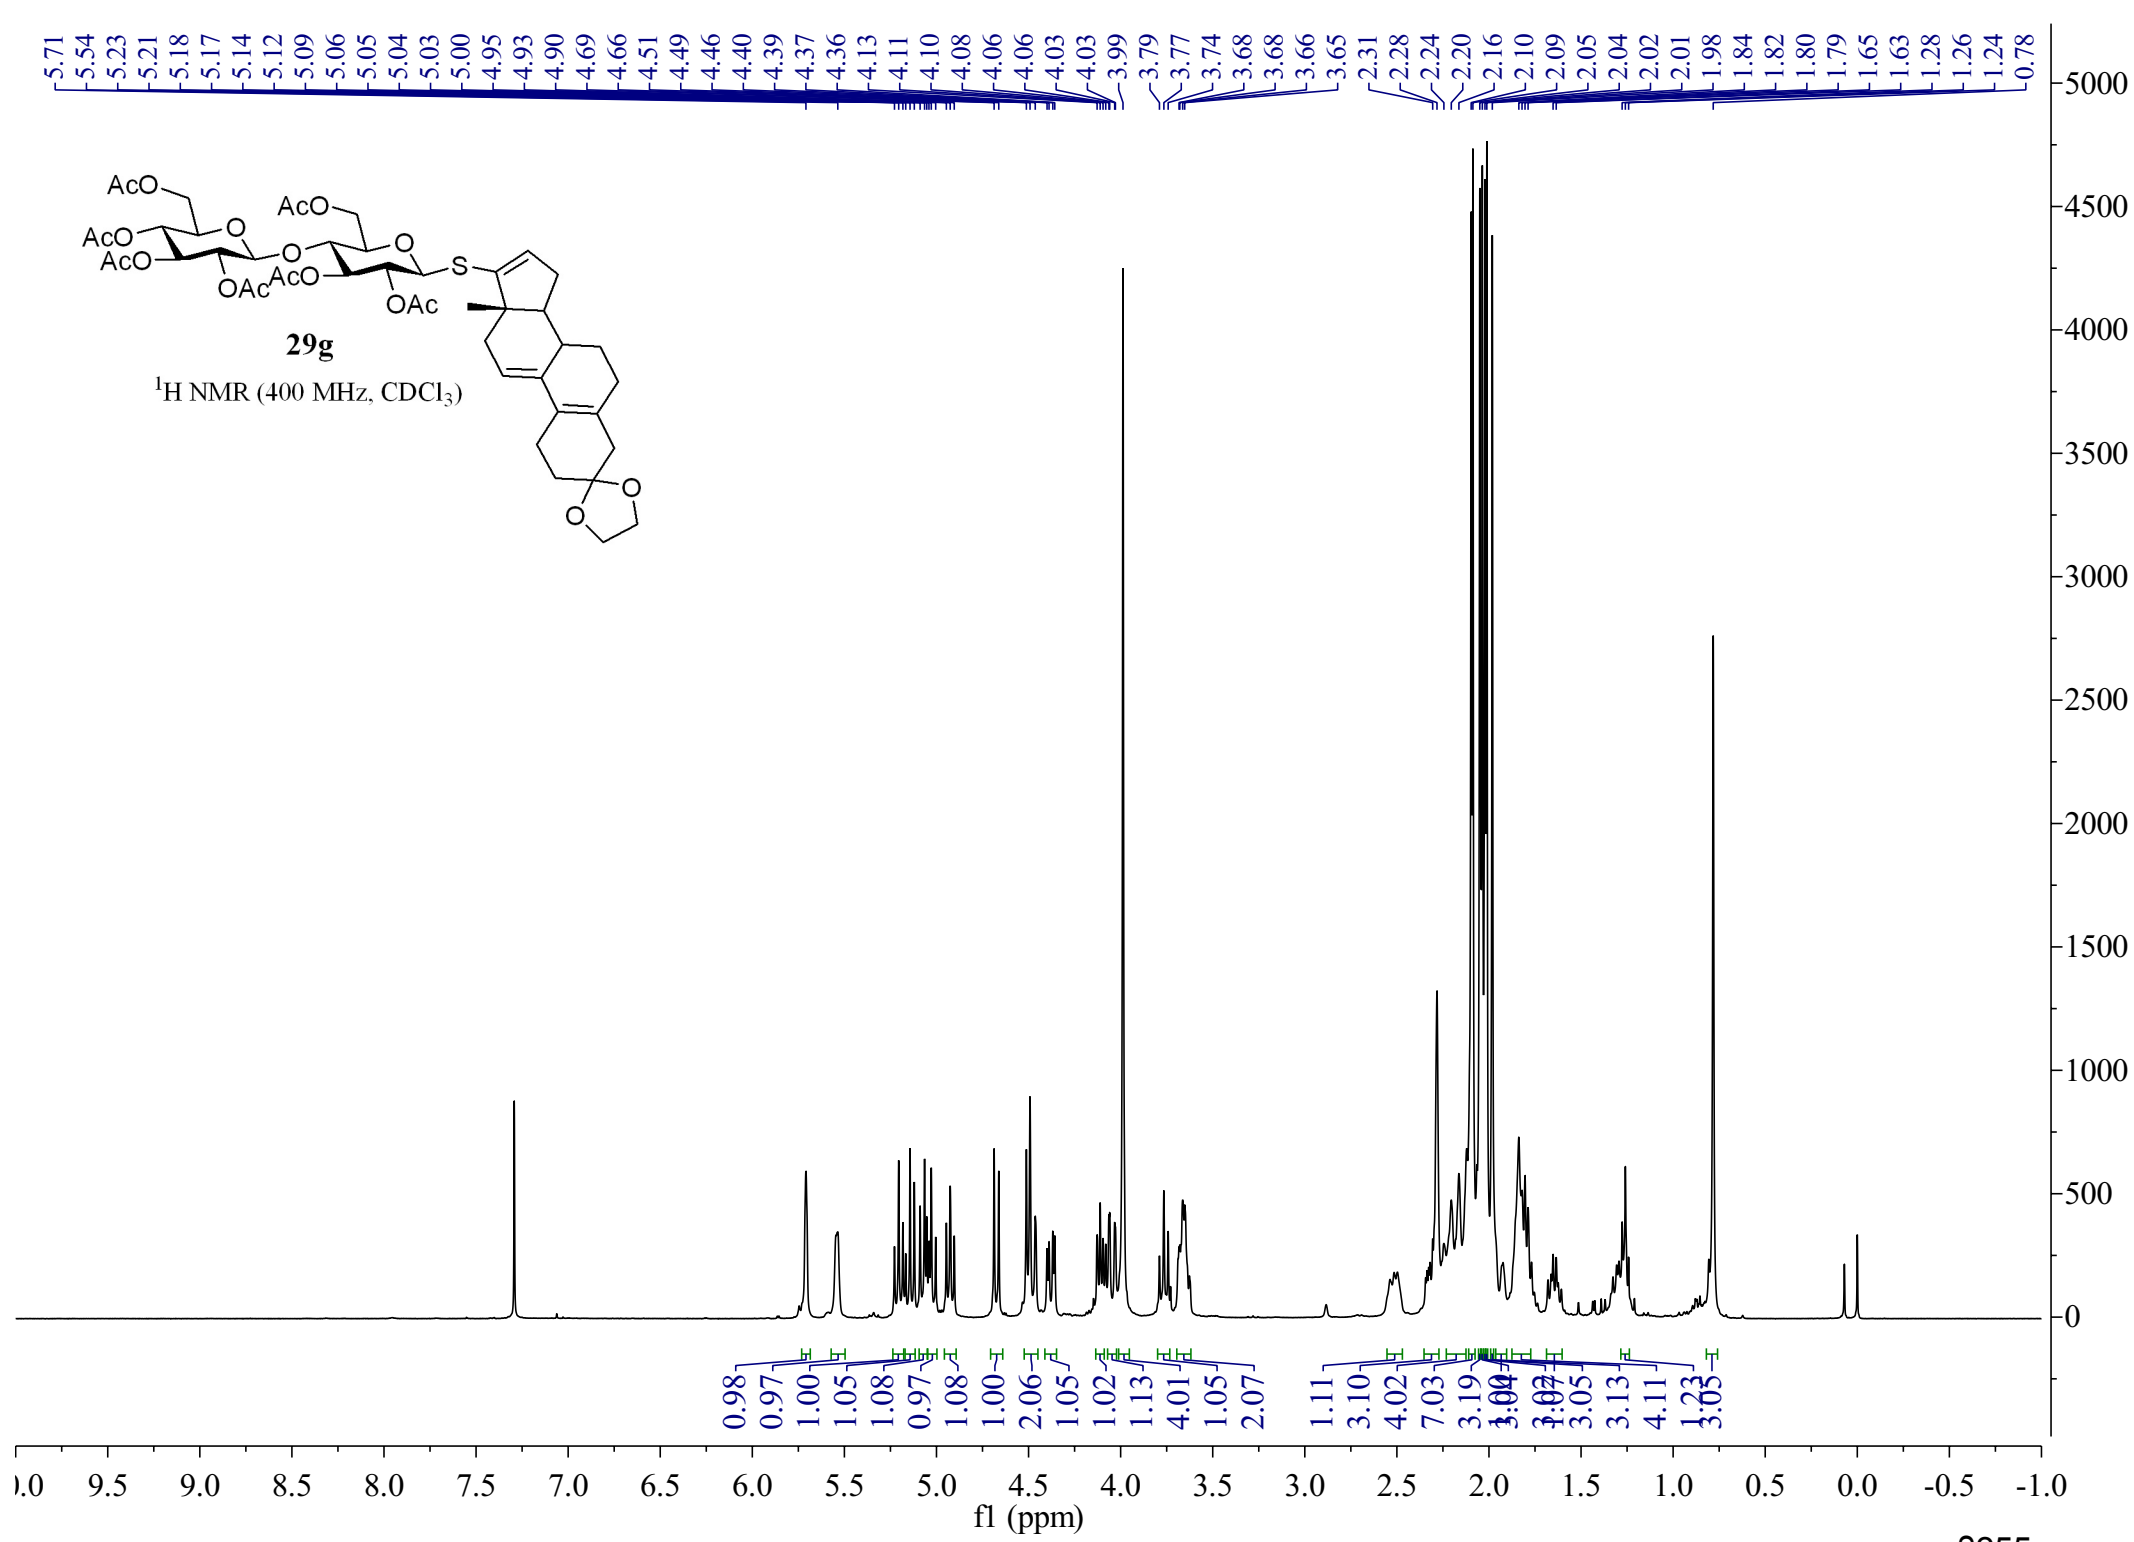

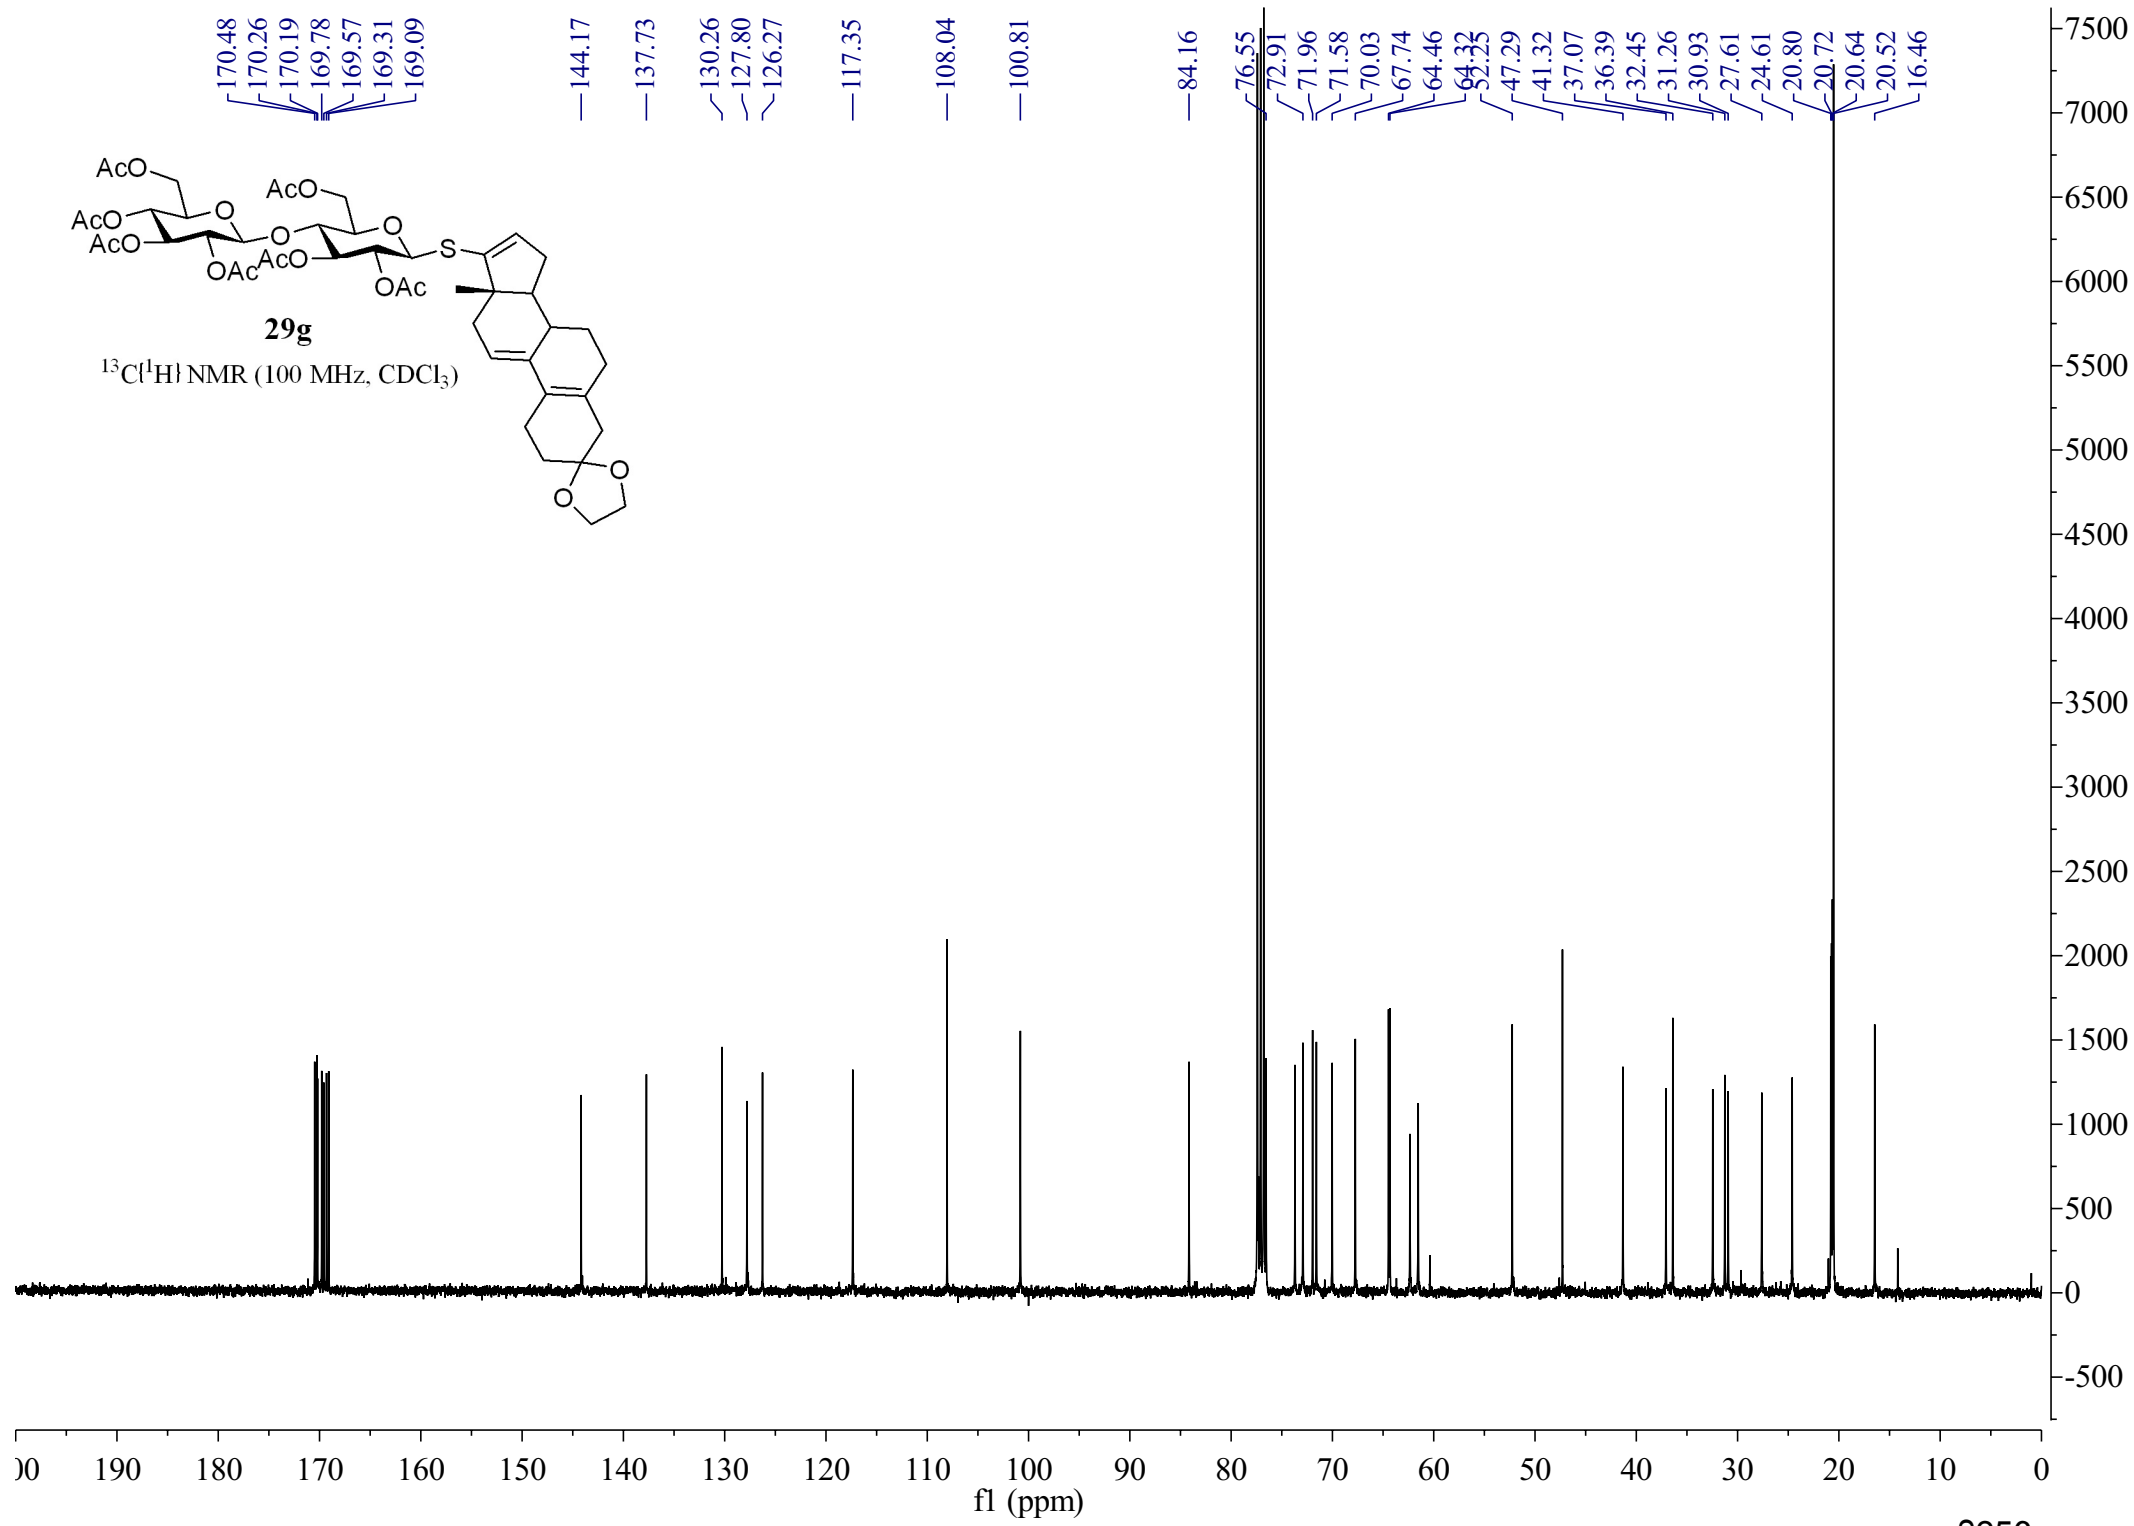

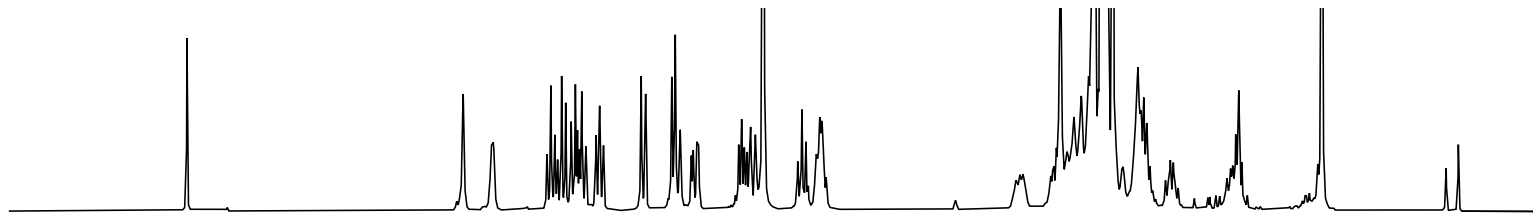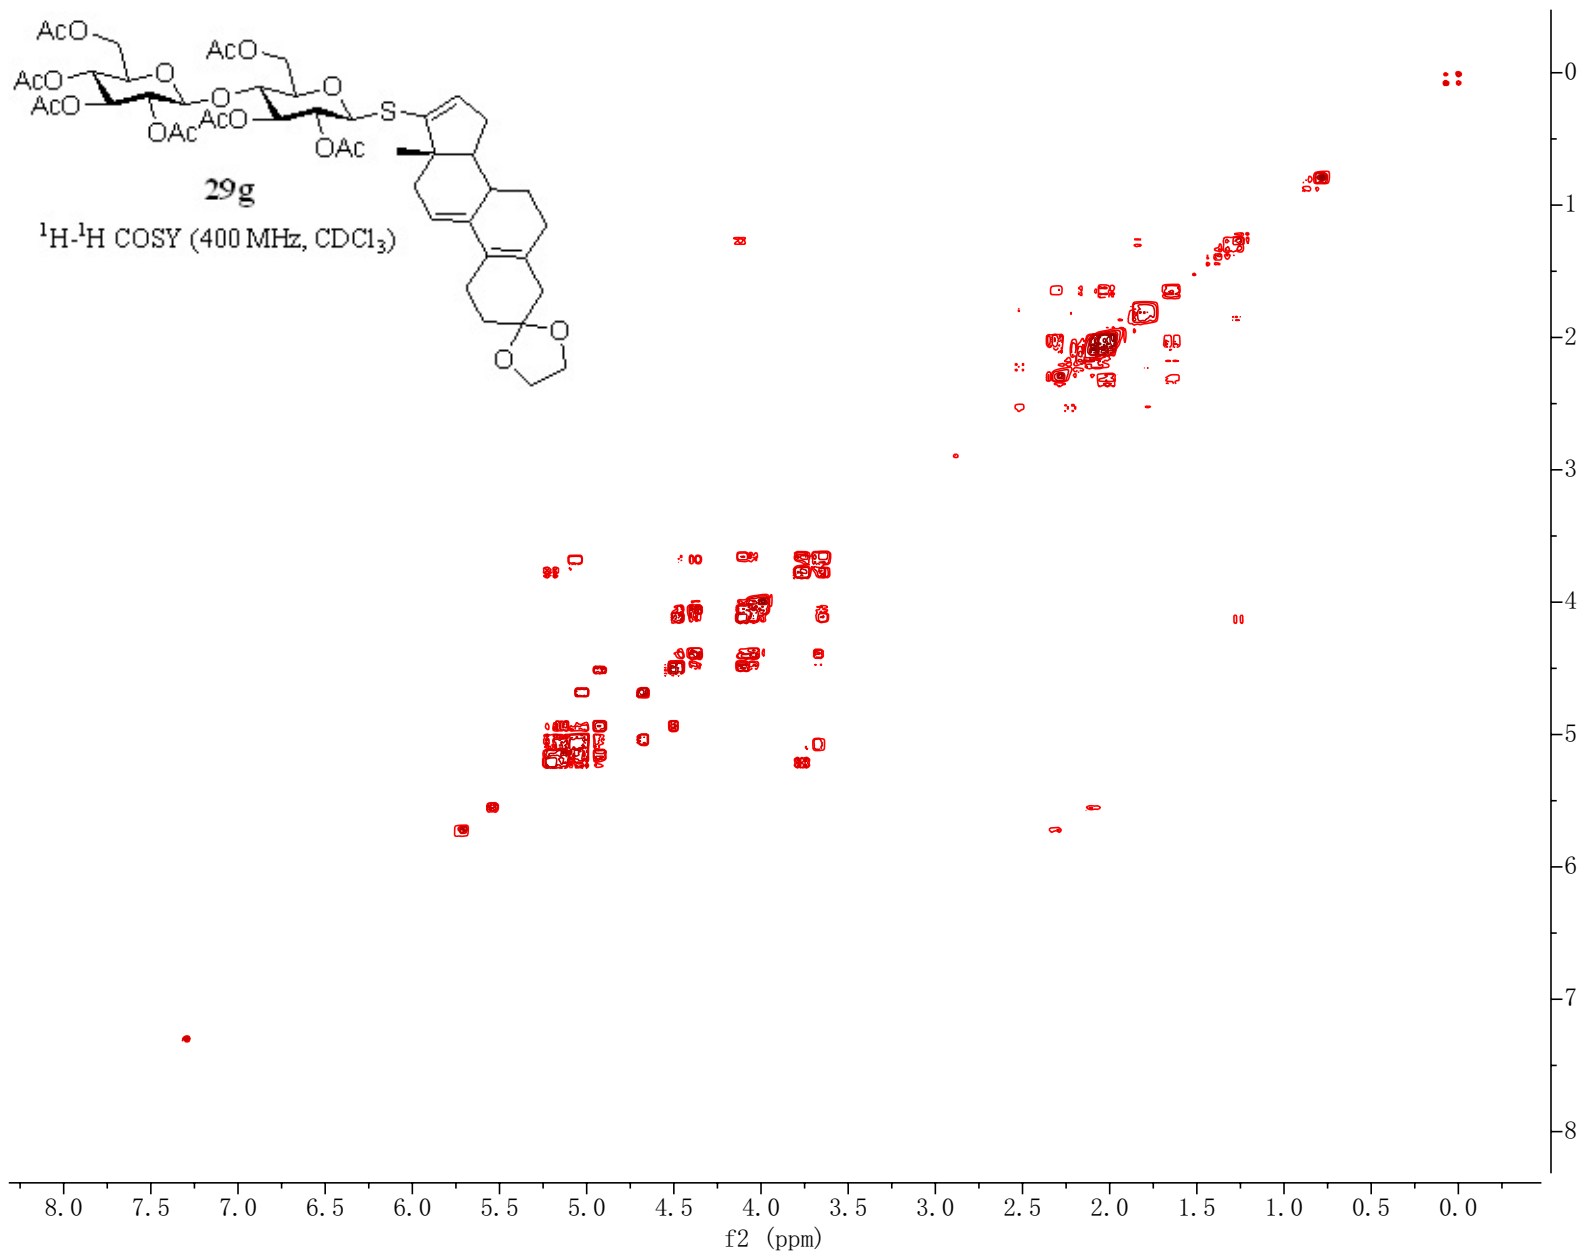



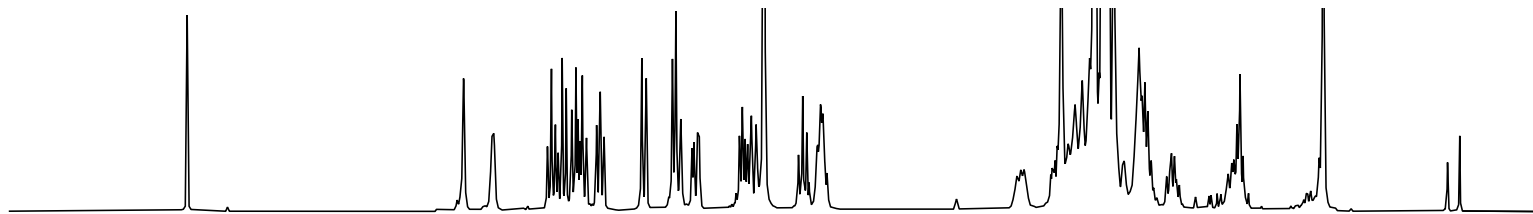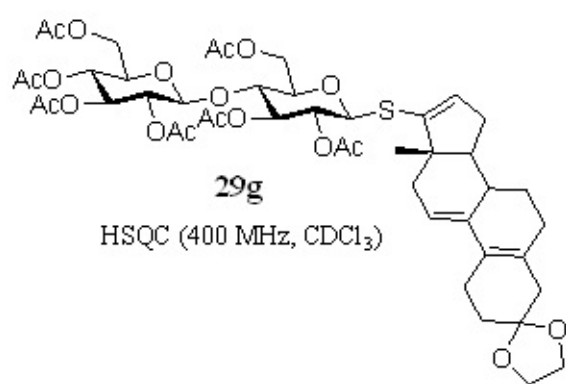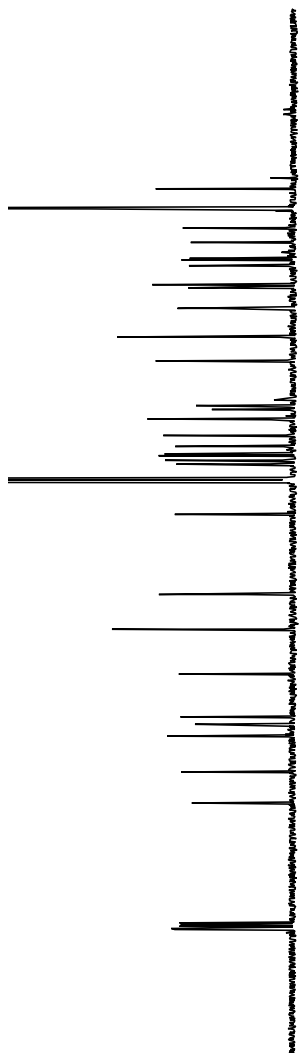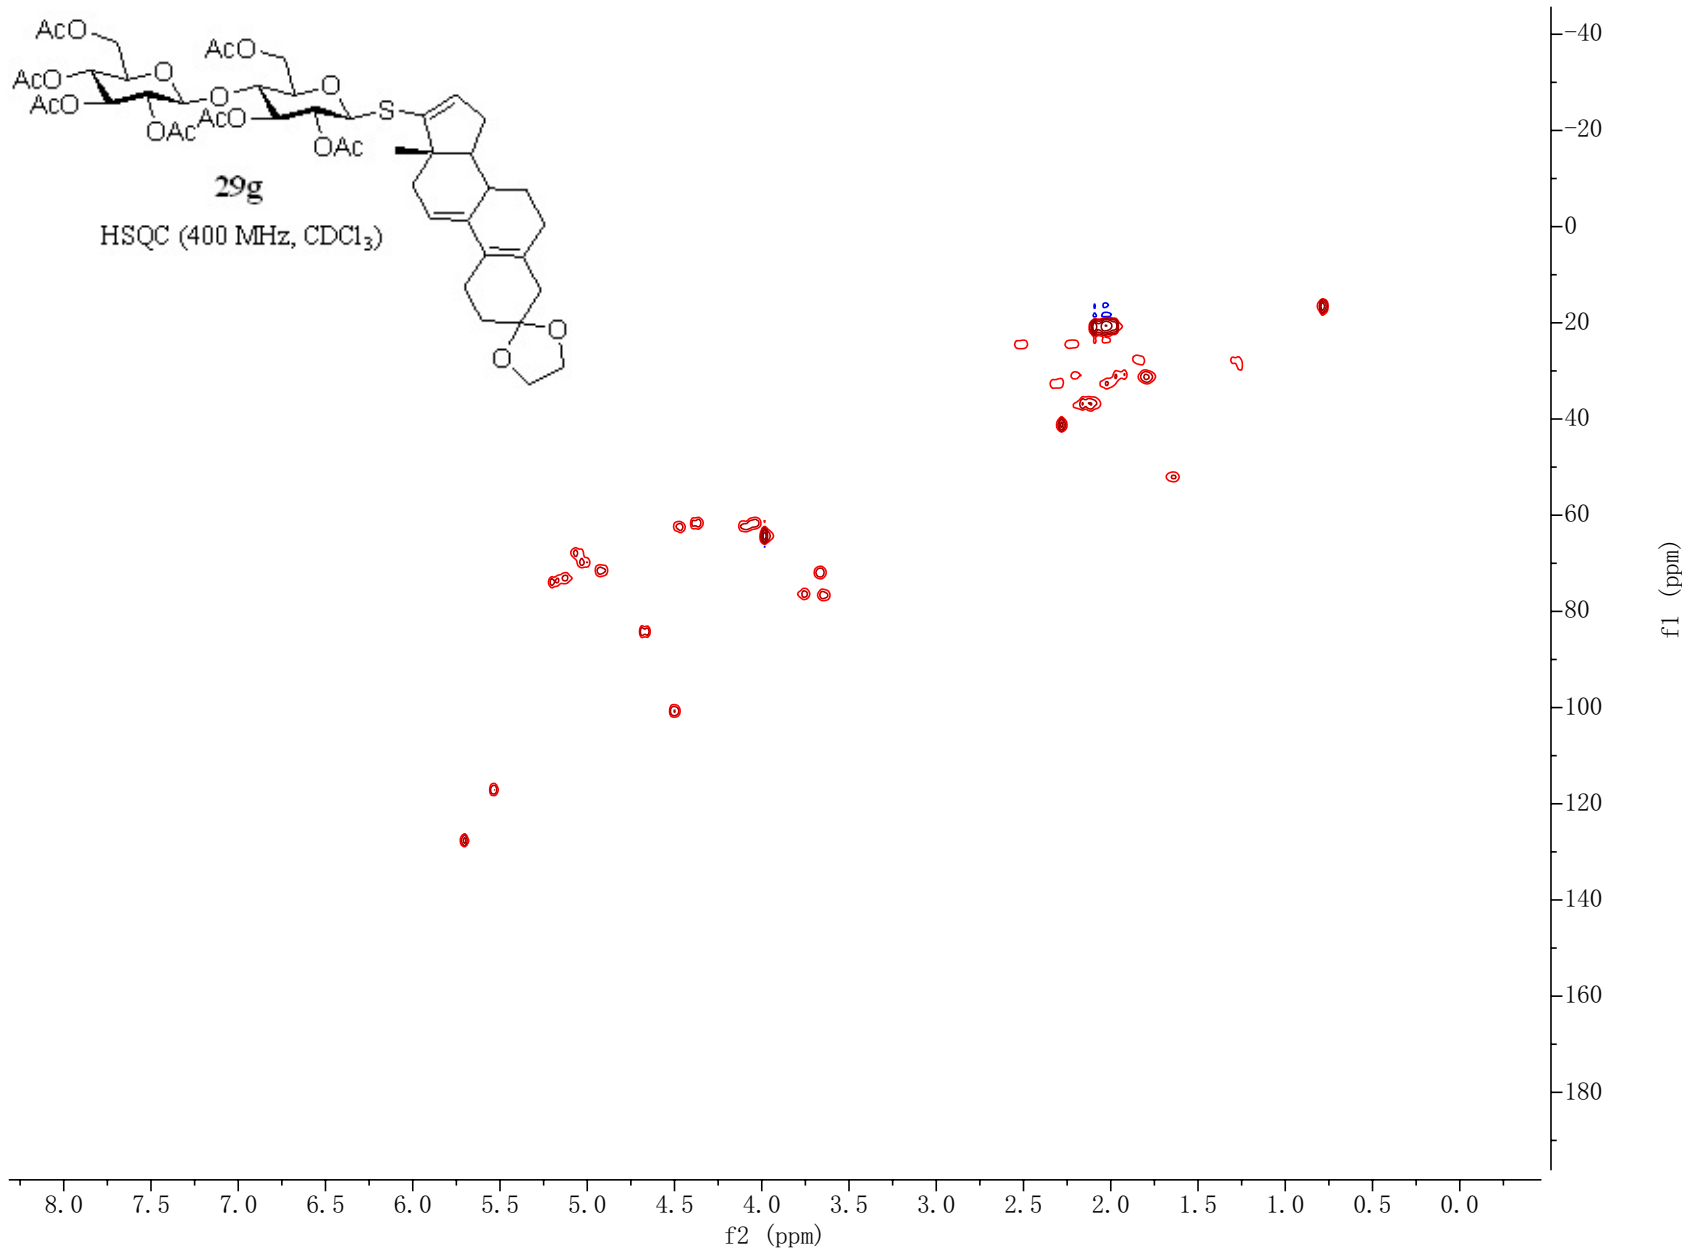

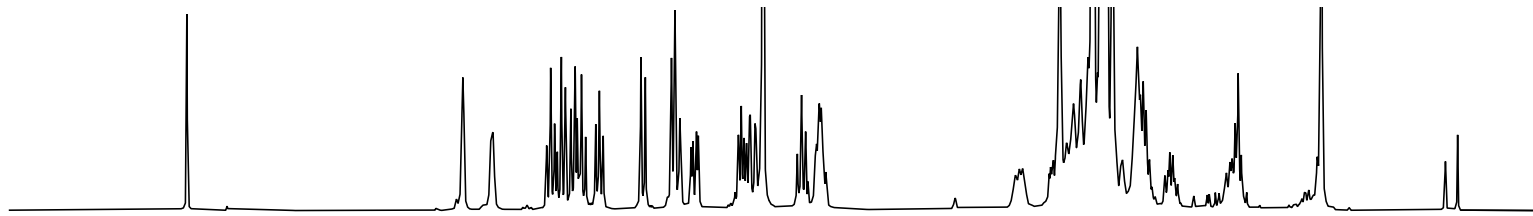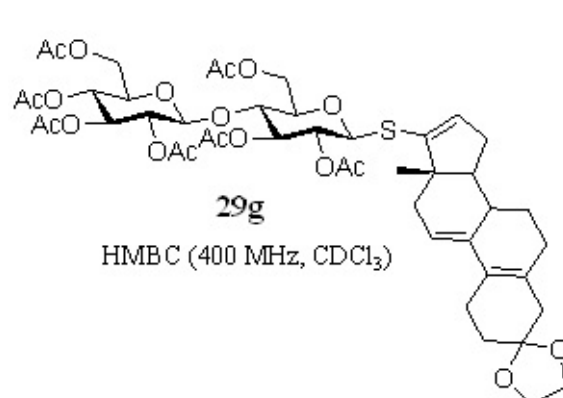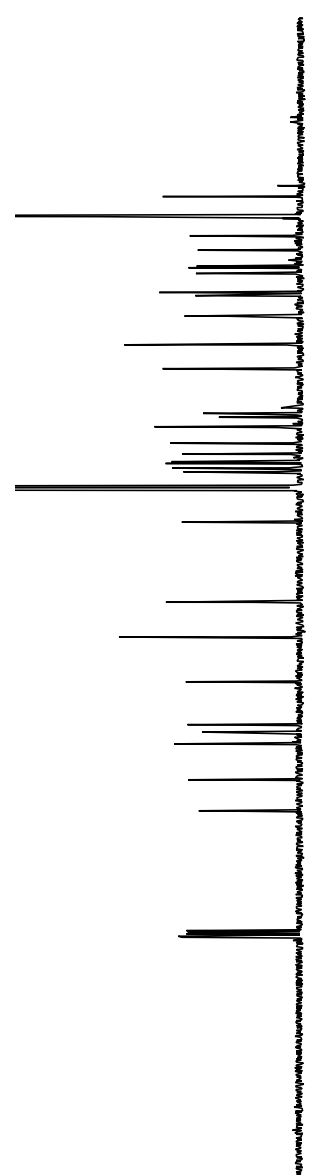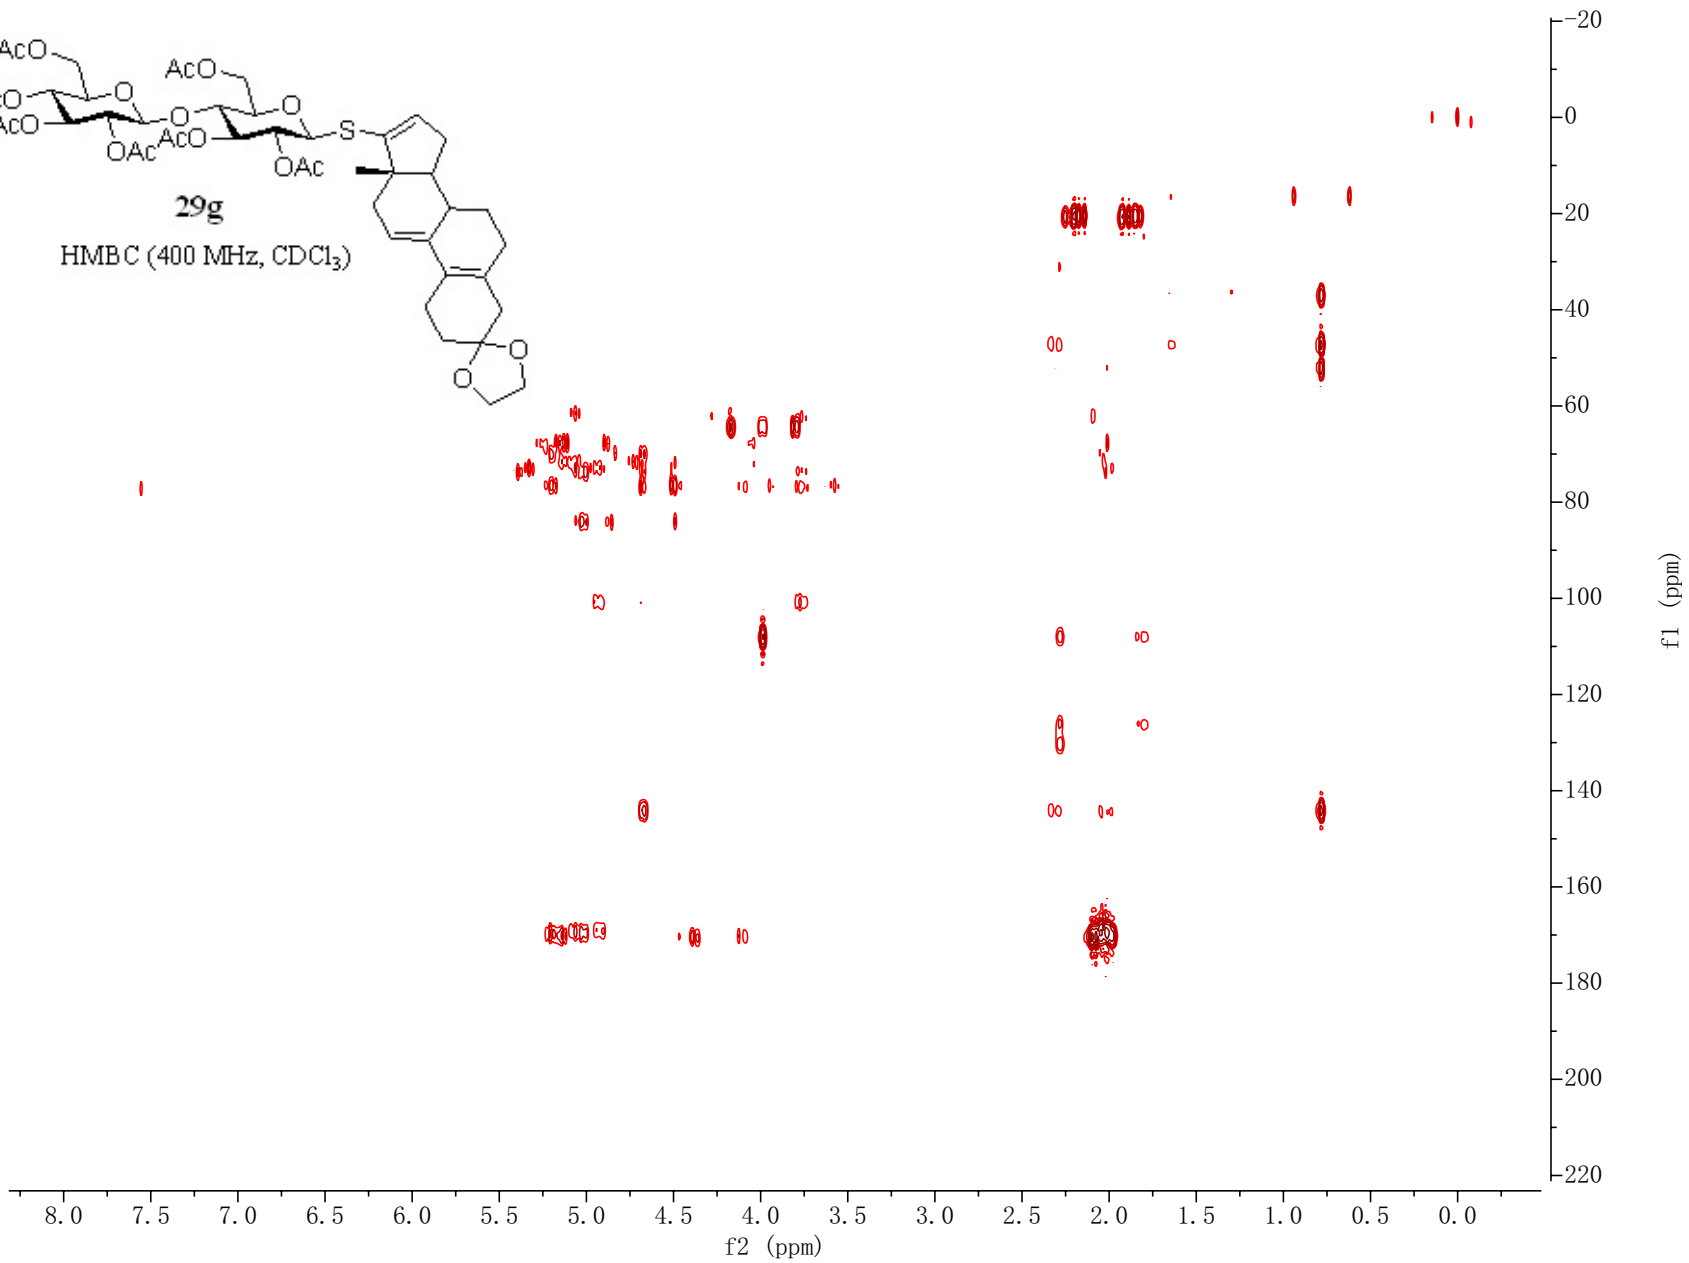

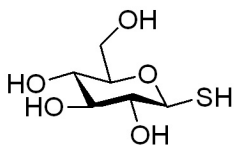

**30**

<sup>1</sup>H NMR (400 MHz, CDCl<sub>3</sub>)

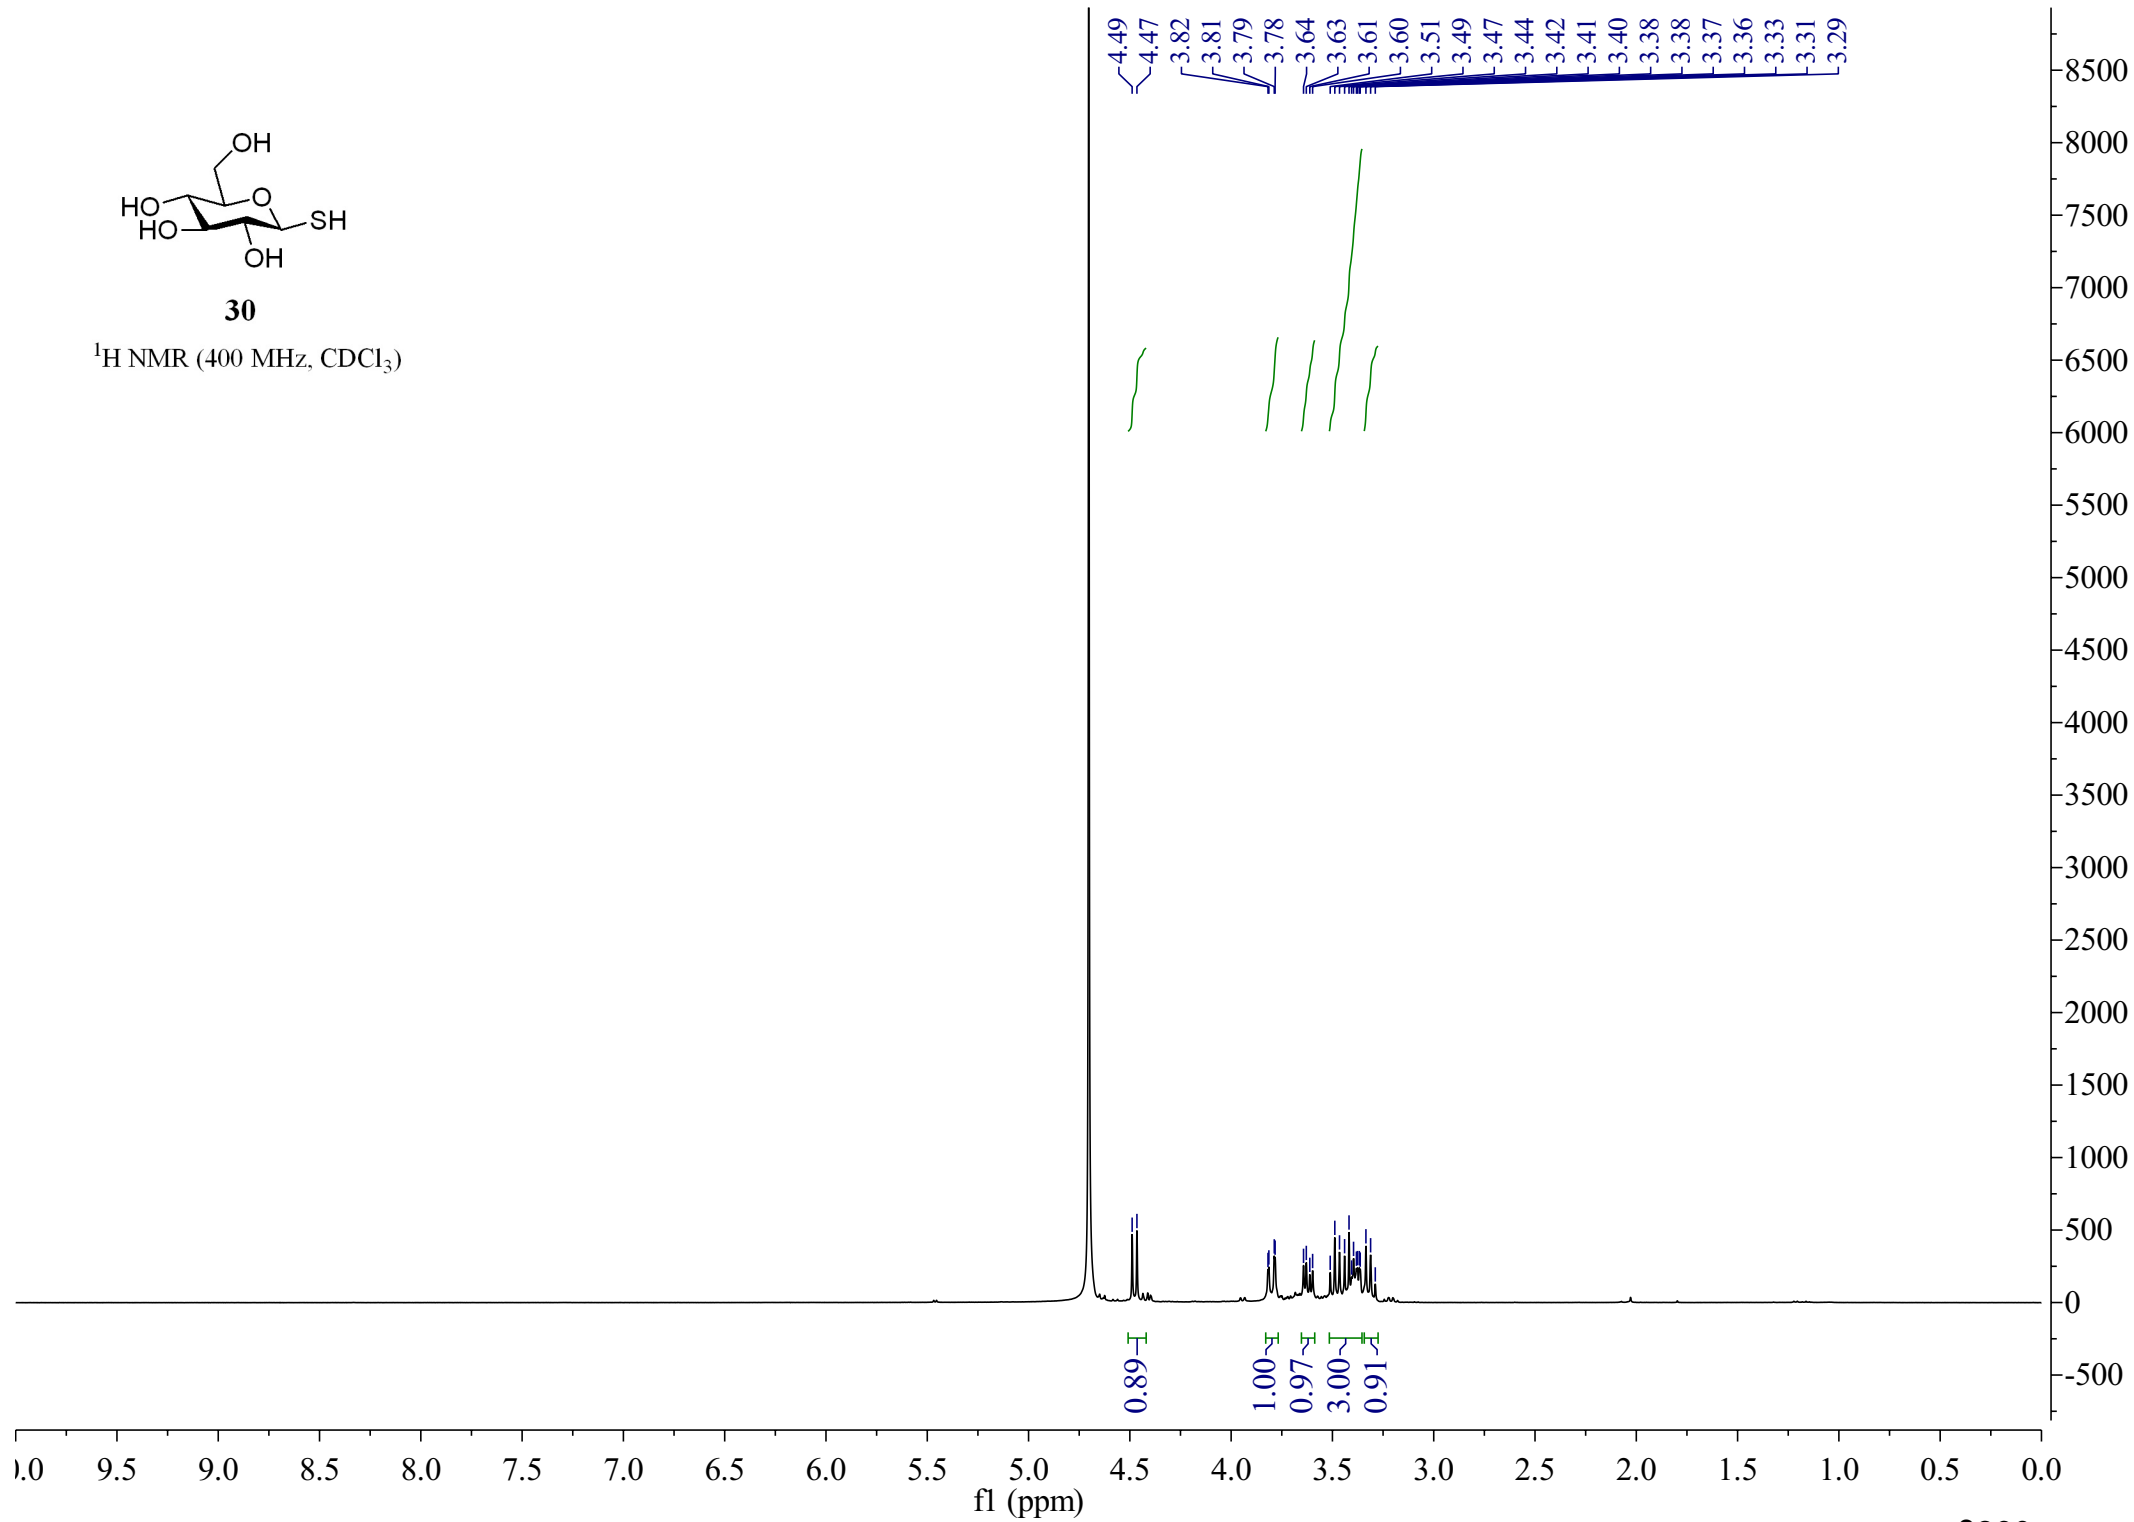

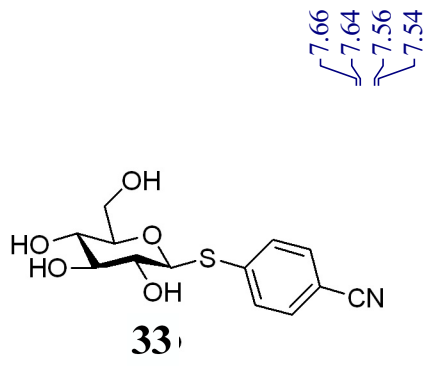

<sup>1</sup>H NMR (400 MHz, CDCl<sub>3</sub>)

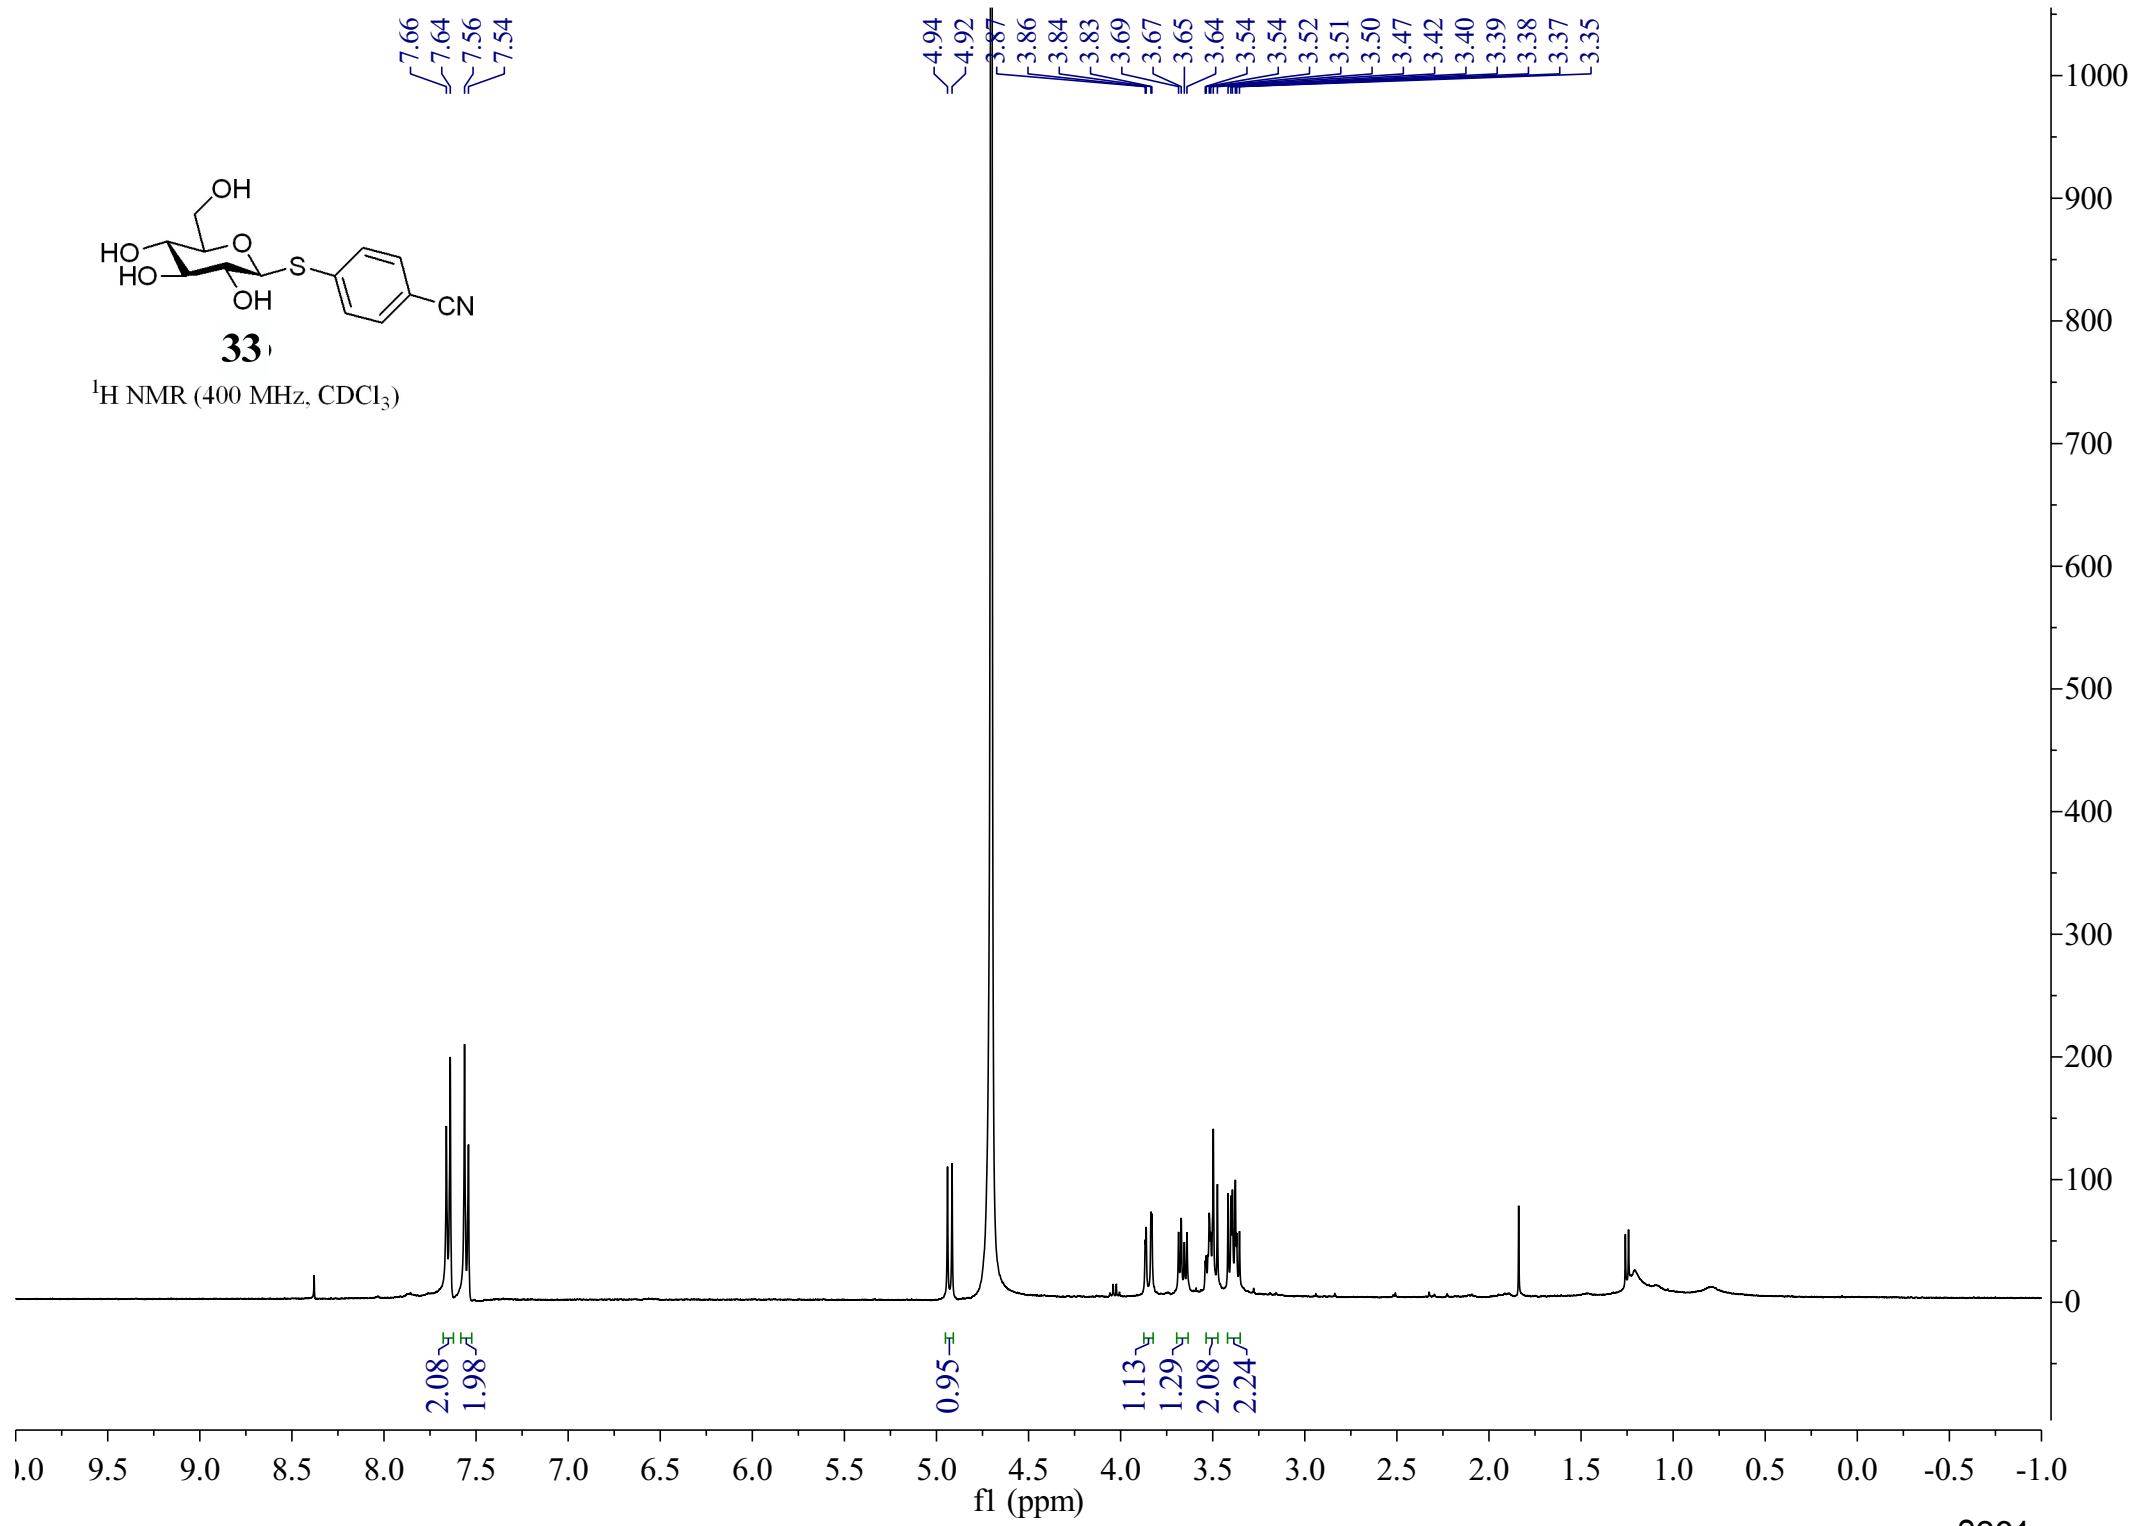

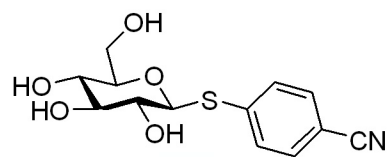

**33**

$^{13}\text{C}\{^1\text{H}\}$  NMR (100 MHz,  $\text{CDCl}_3$ )

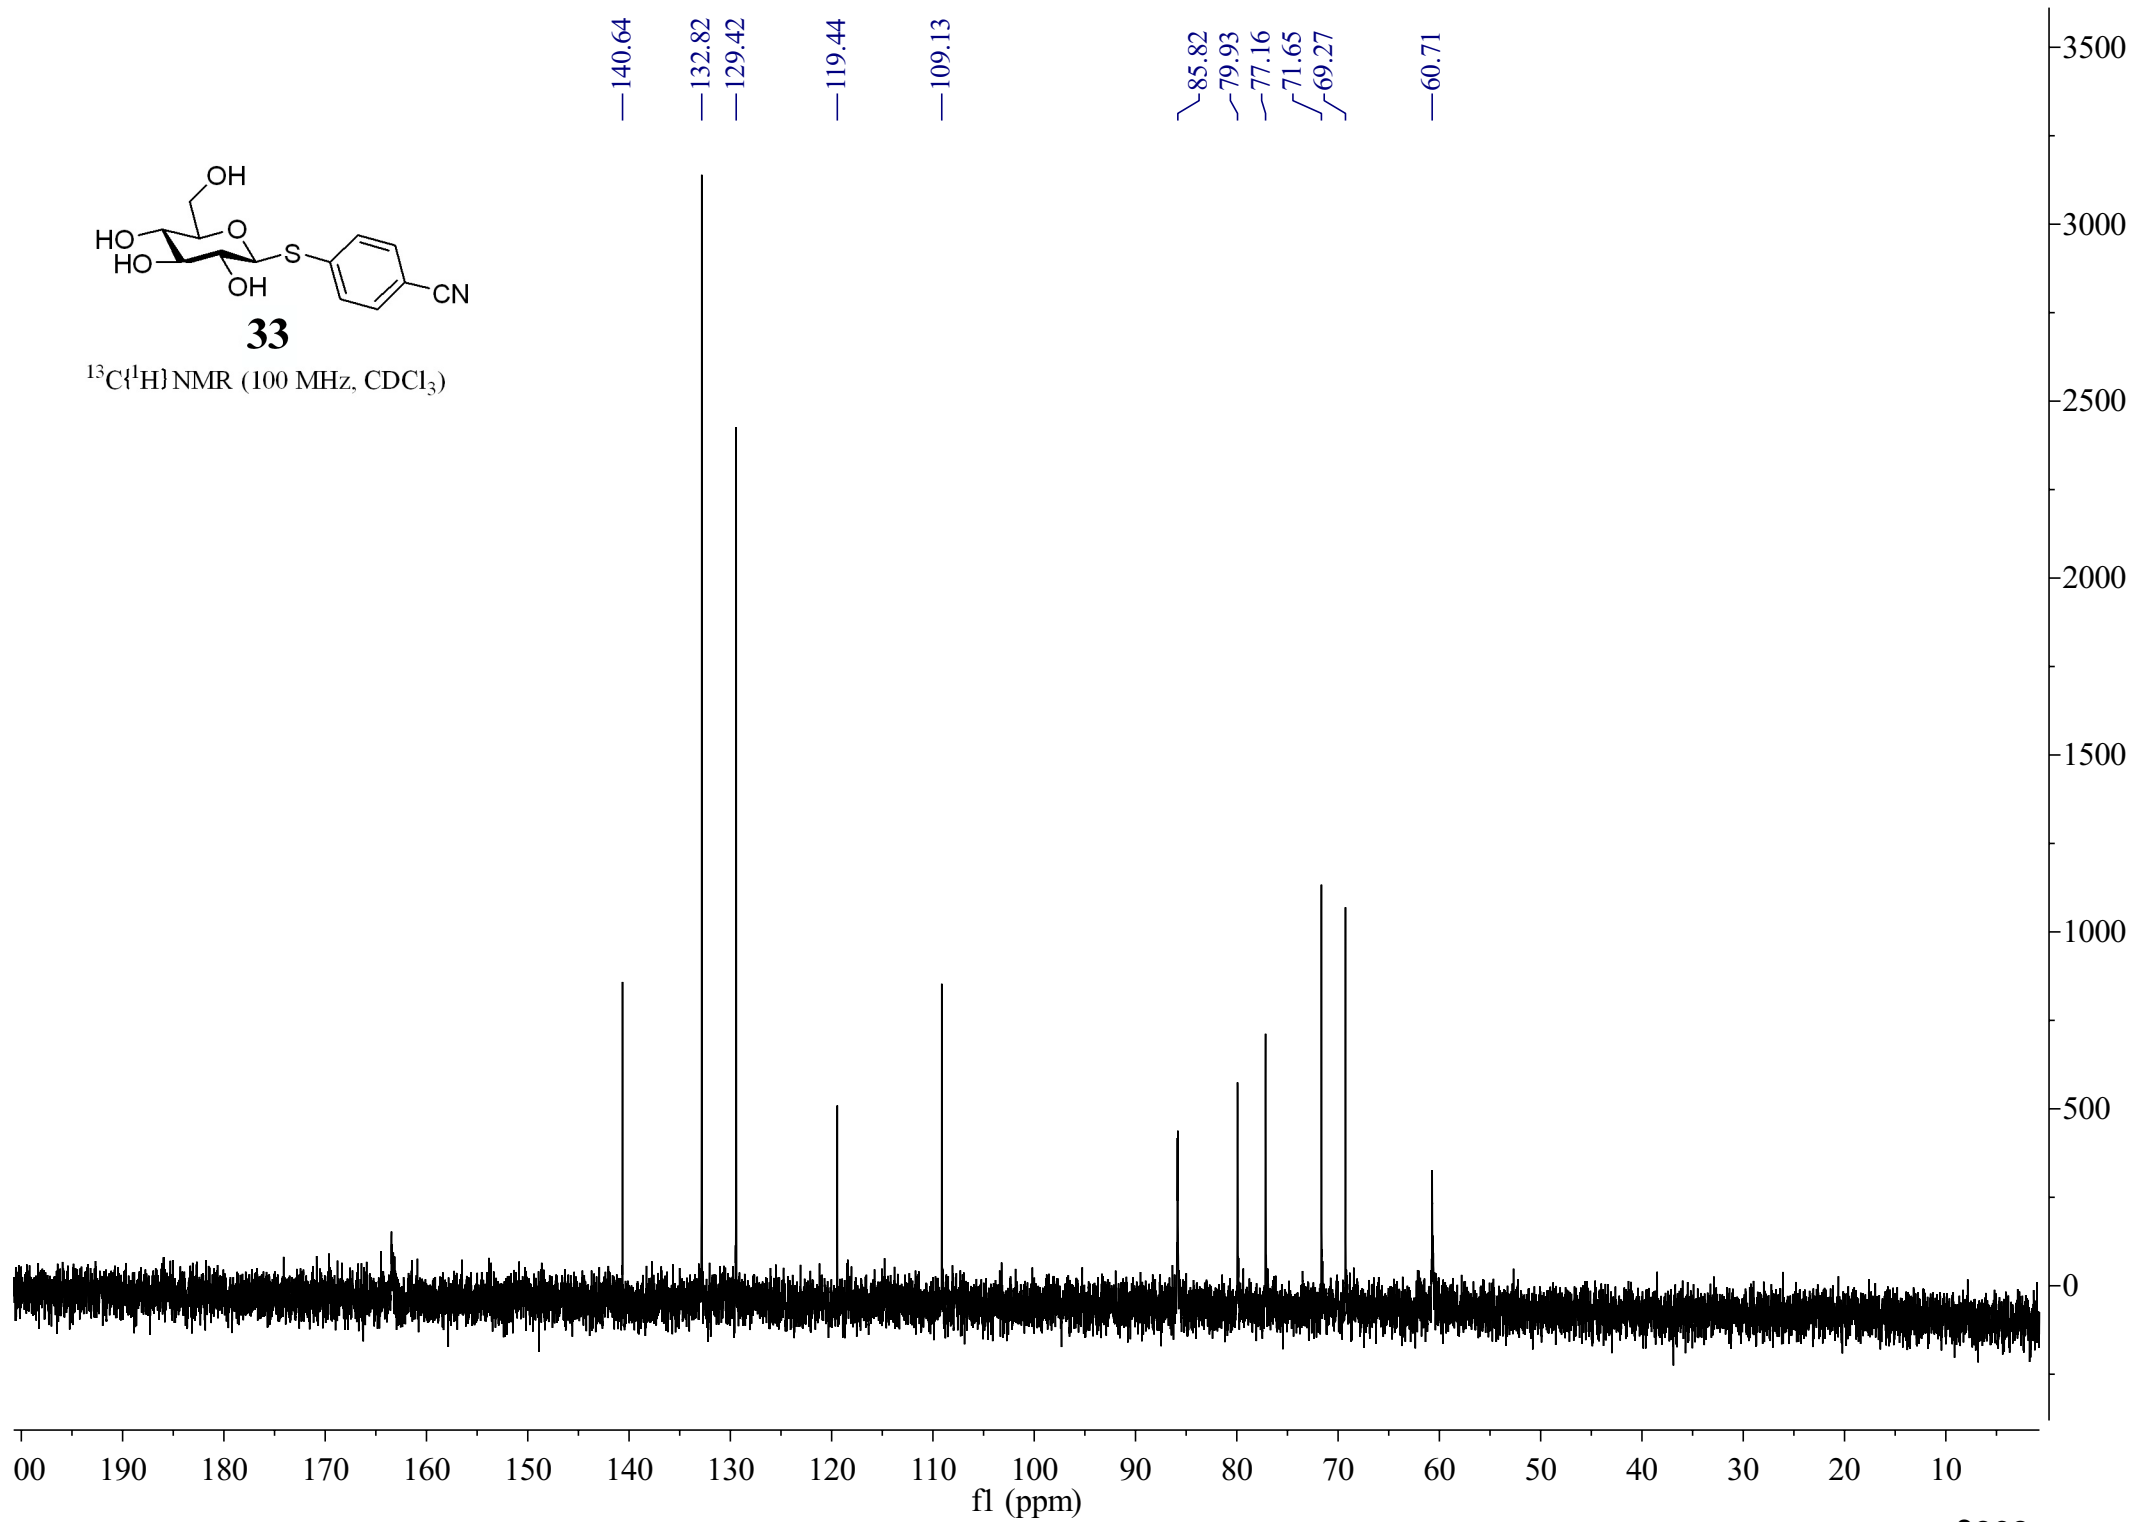

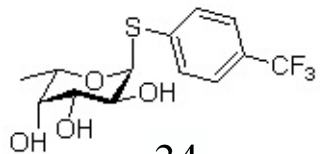

34

<sup>1</sup>H NMR (600 MHz, CDCl<sub>3</sub>)

7.65  
7.63  
7.58  
7.56

4.72  
4.71  
3.77  
3.77  
3.76  
3.76  
3.75  
3.75  
3.74  
3.74  
3.69  
3.69  
3.69  
3.69  
3.63  
3.62  
3.60  
3.53  
3.53  
3.52  
3.51  
1.29  
1.28

2.03  
2.03

1.05

1.02  
1.01  
1.00  
1.03

3.04

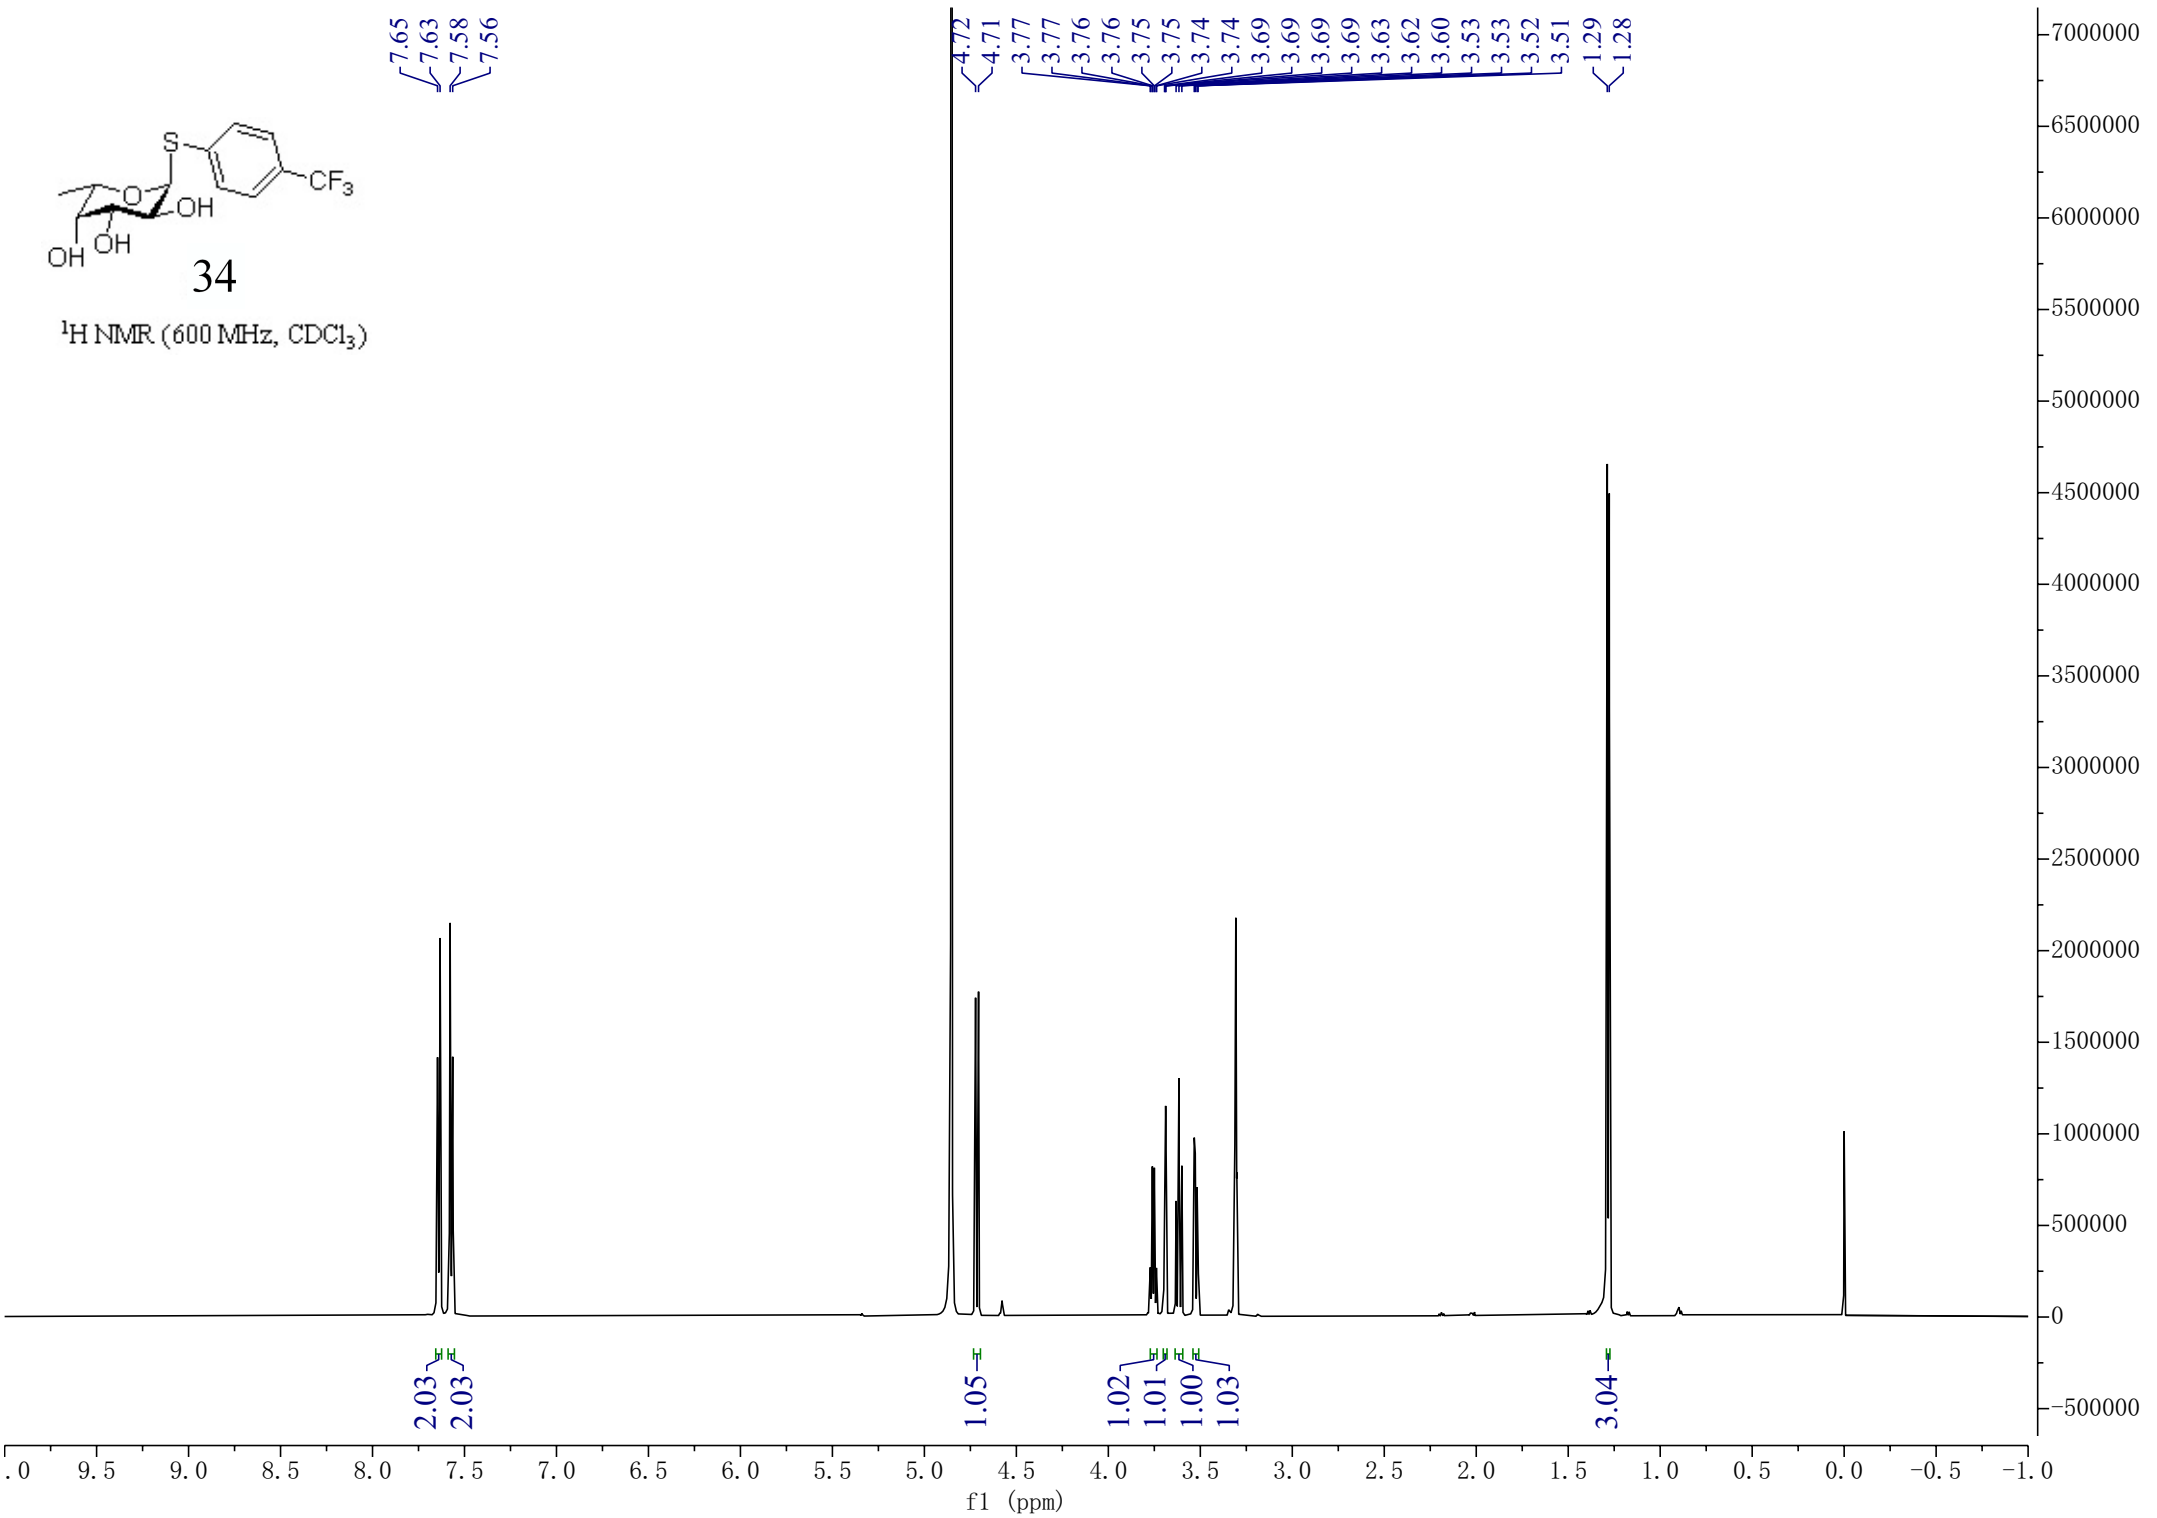

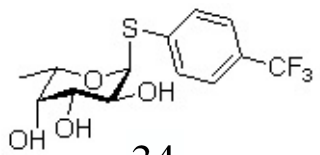

34

$^{13}\text{C}$  NMR (150 MHz,  $\text{CDCl}_3$ )

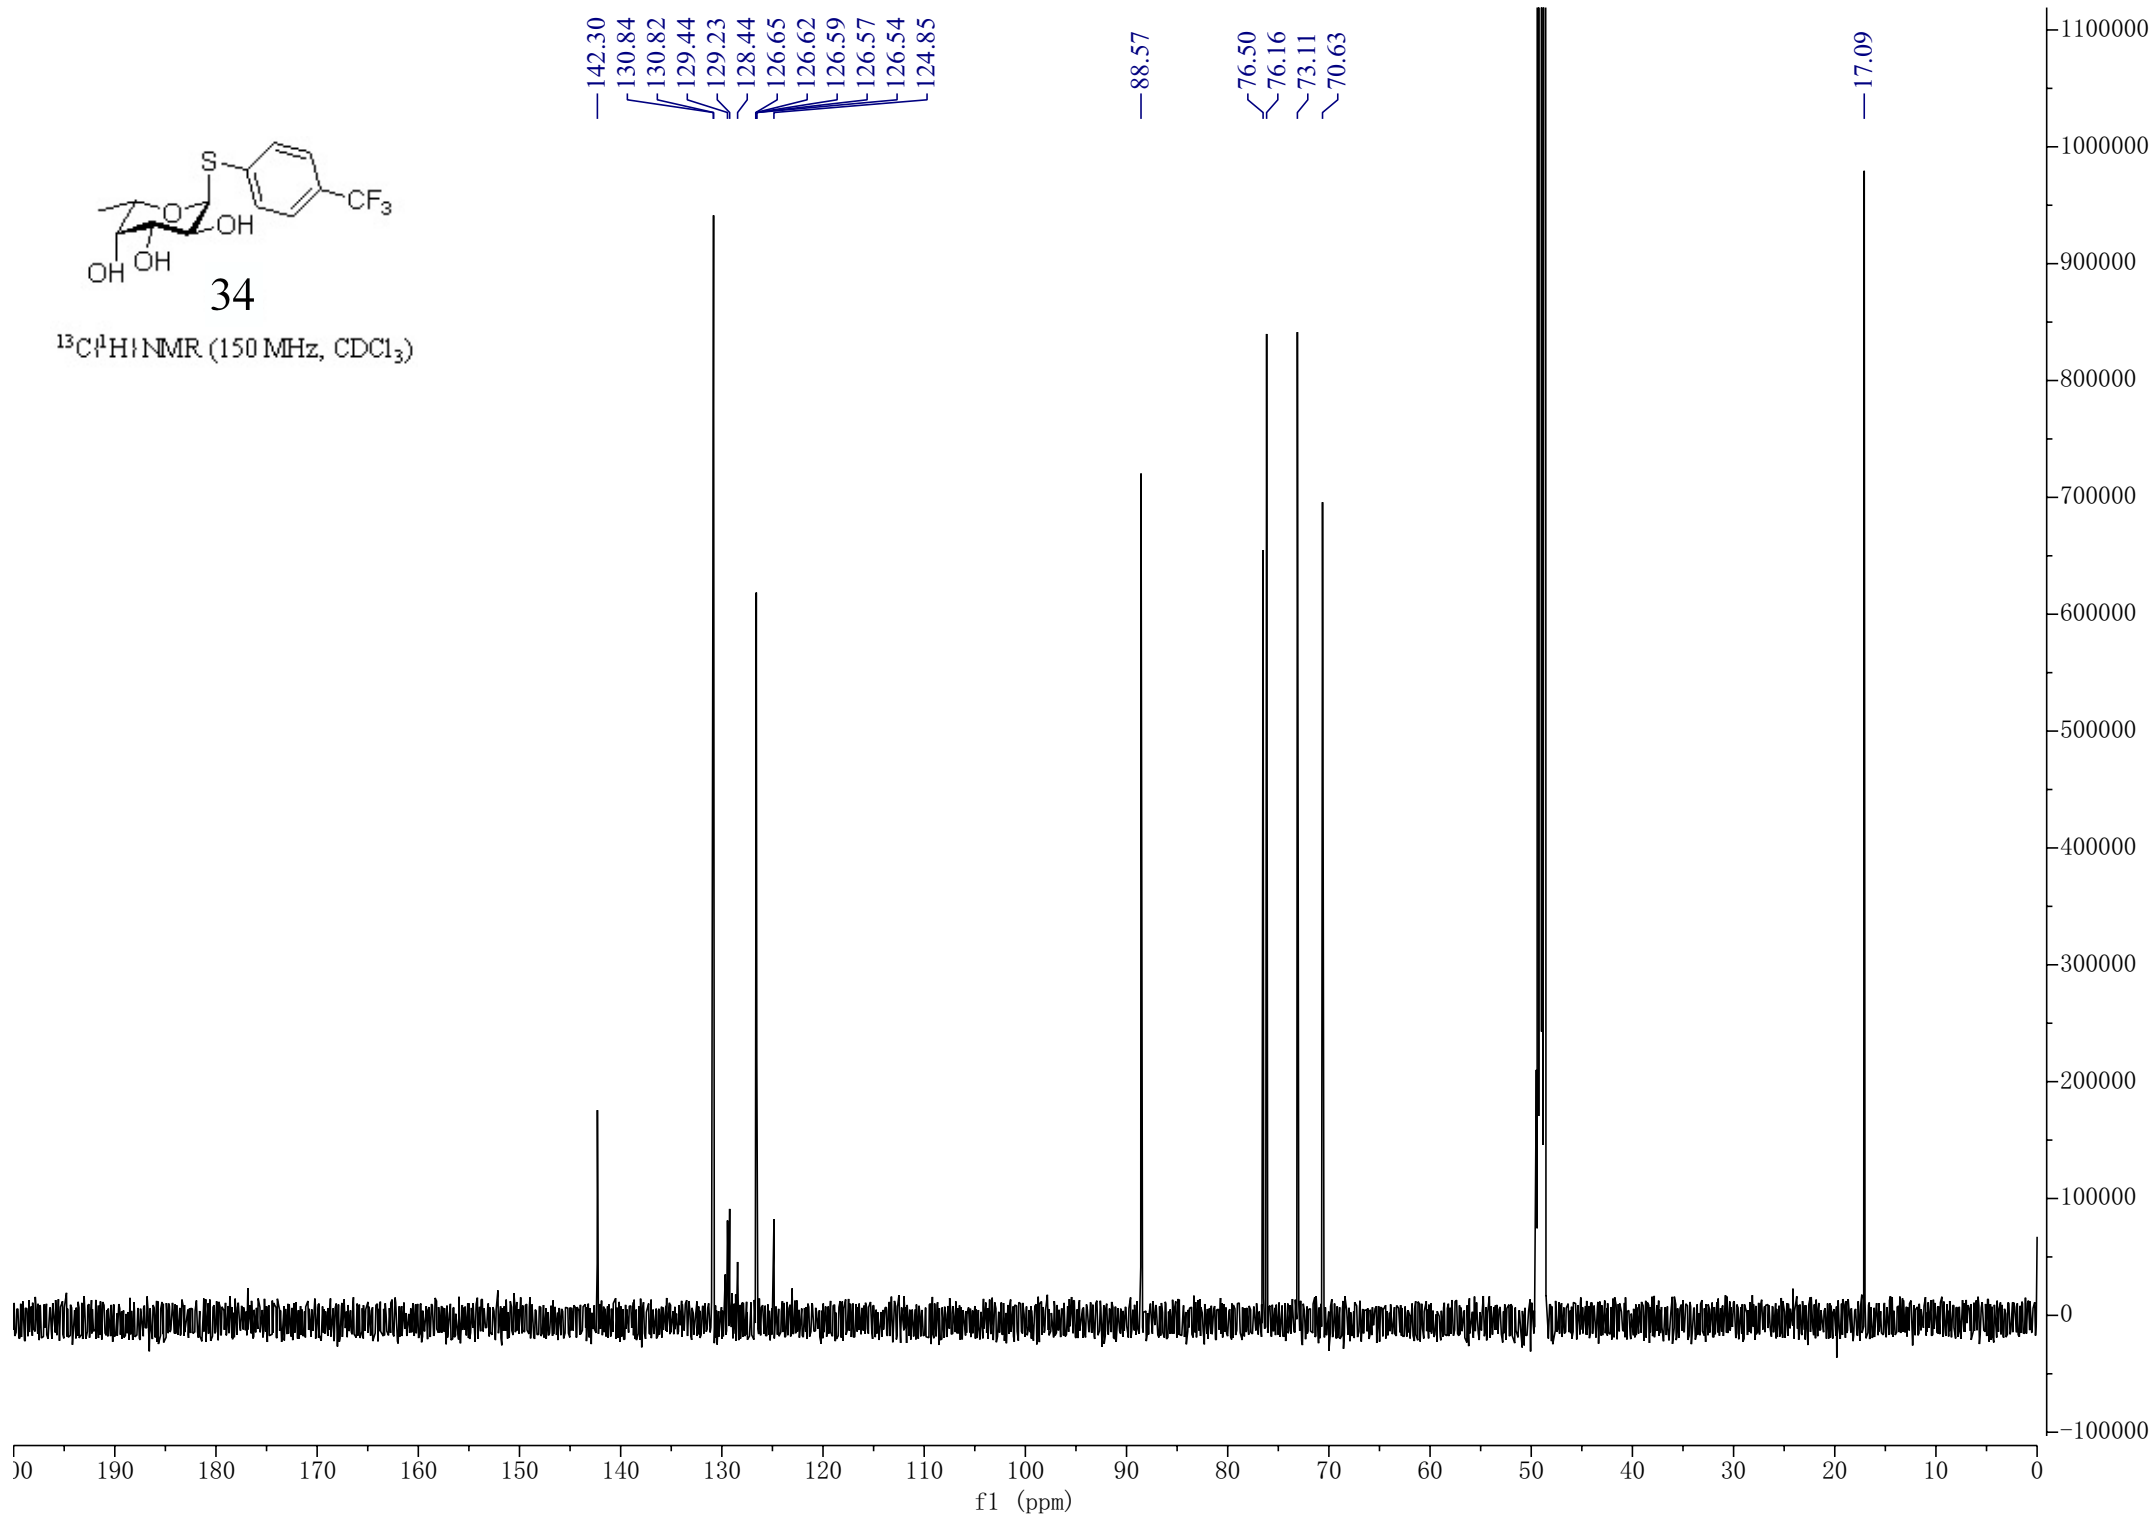

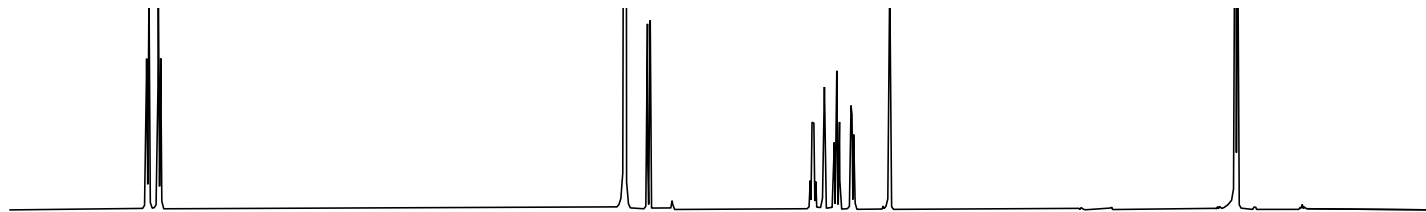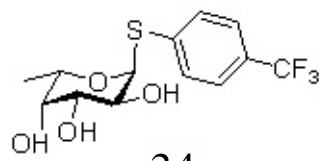

34

<sup>1</sup>H-<sup>1</sup>H COSY (600 MHz, CDCl<sub>3</sub>)

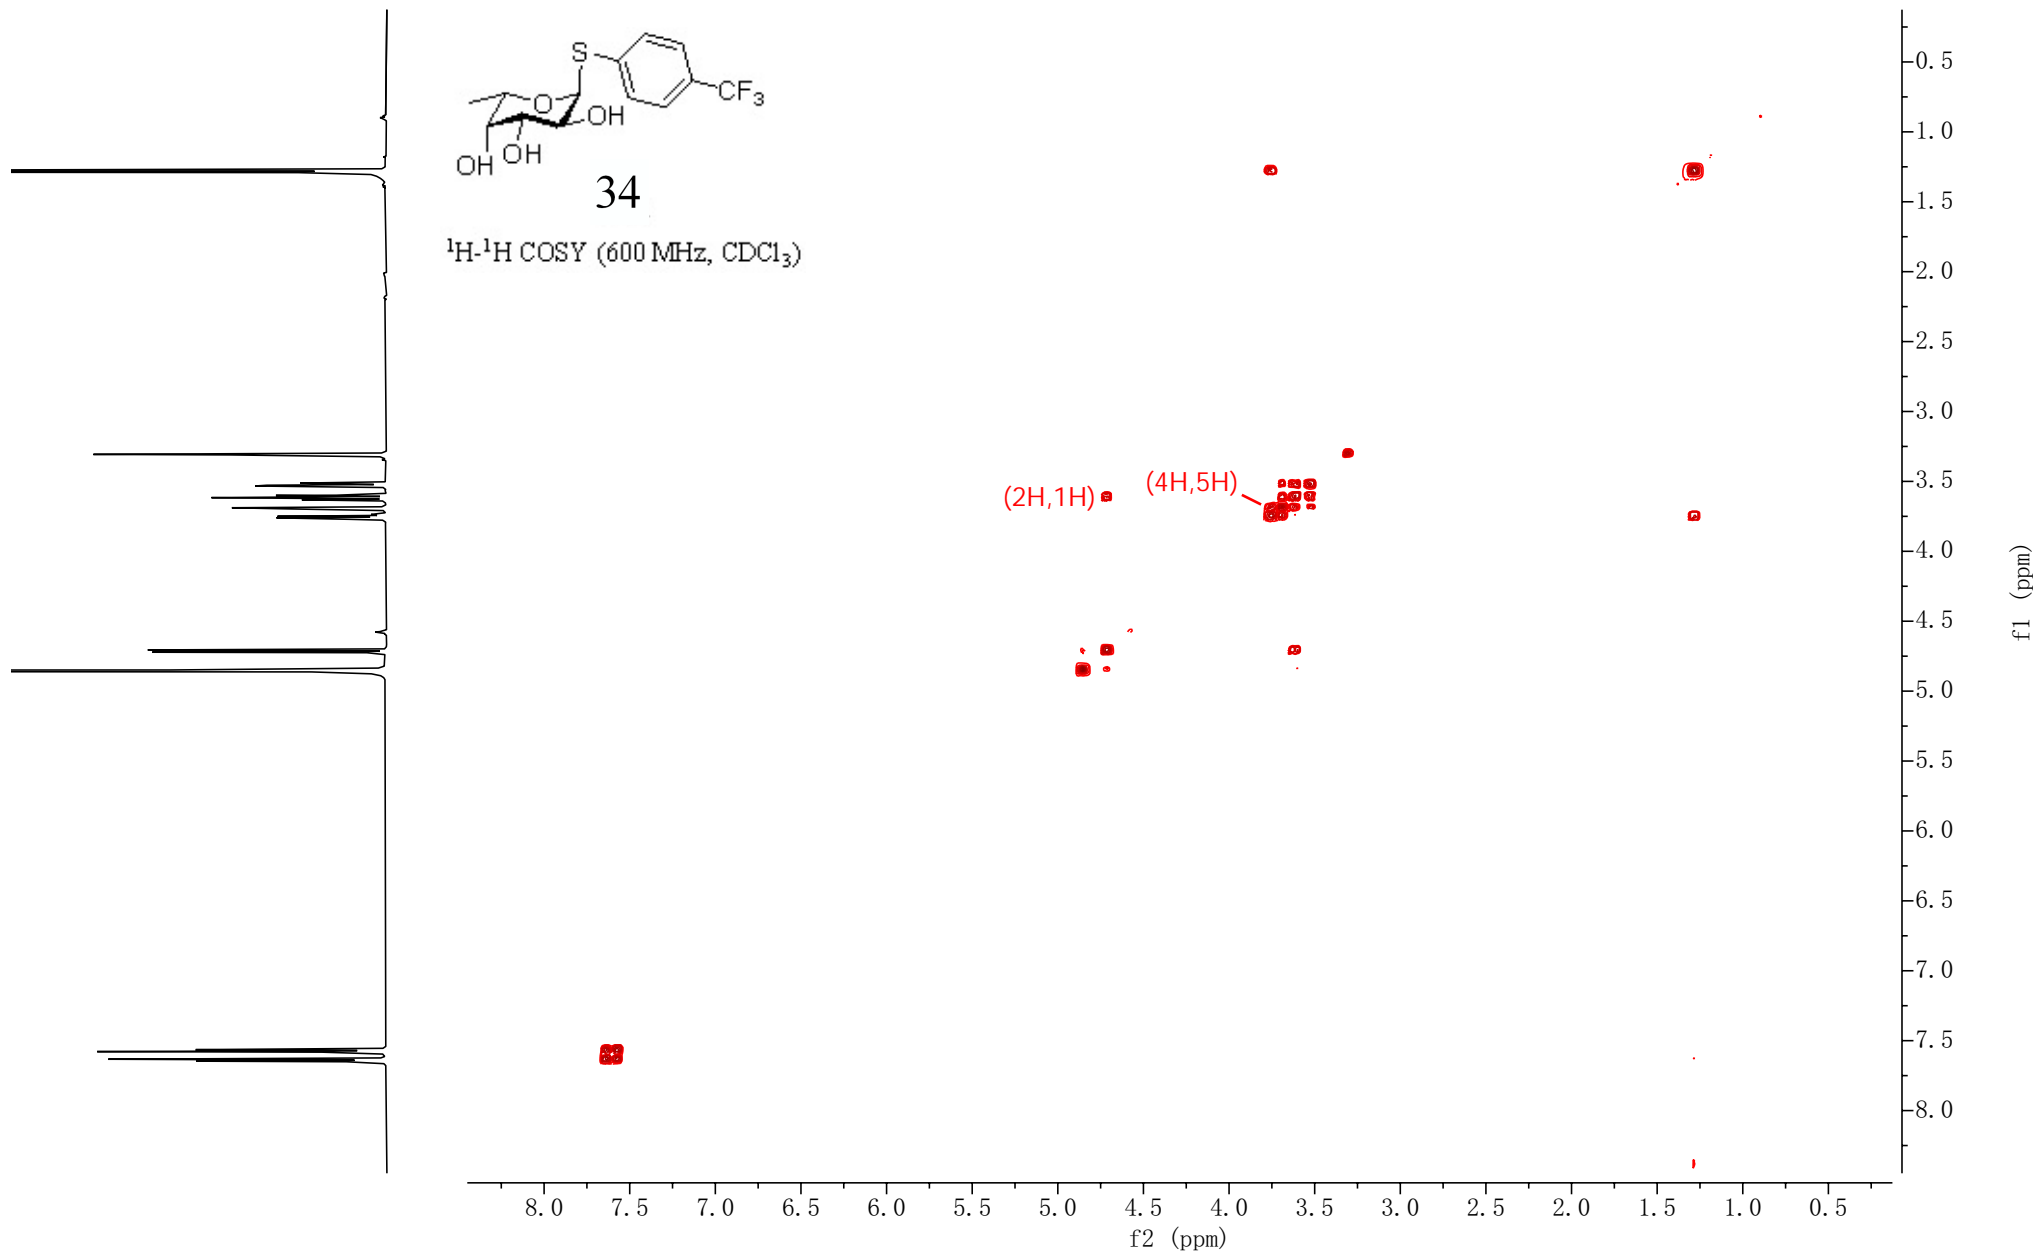



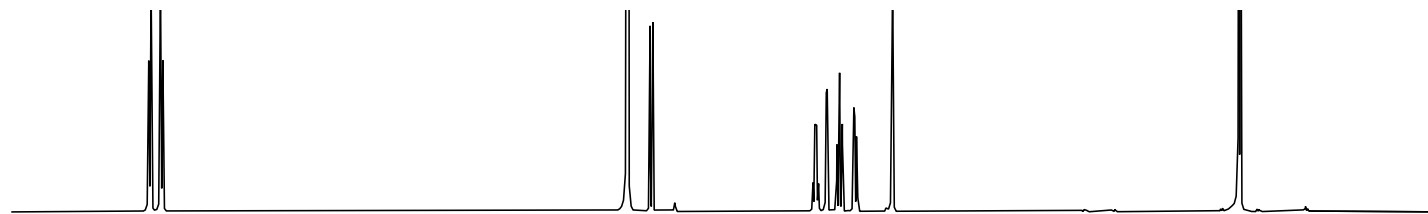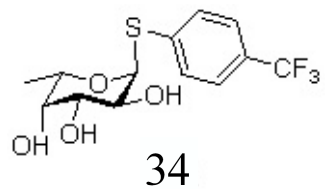

HSQC (600 MHz, CDCl<sub>3</sub>)

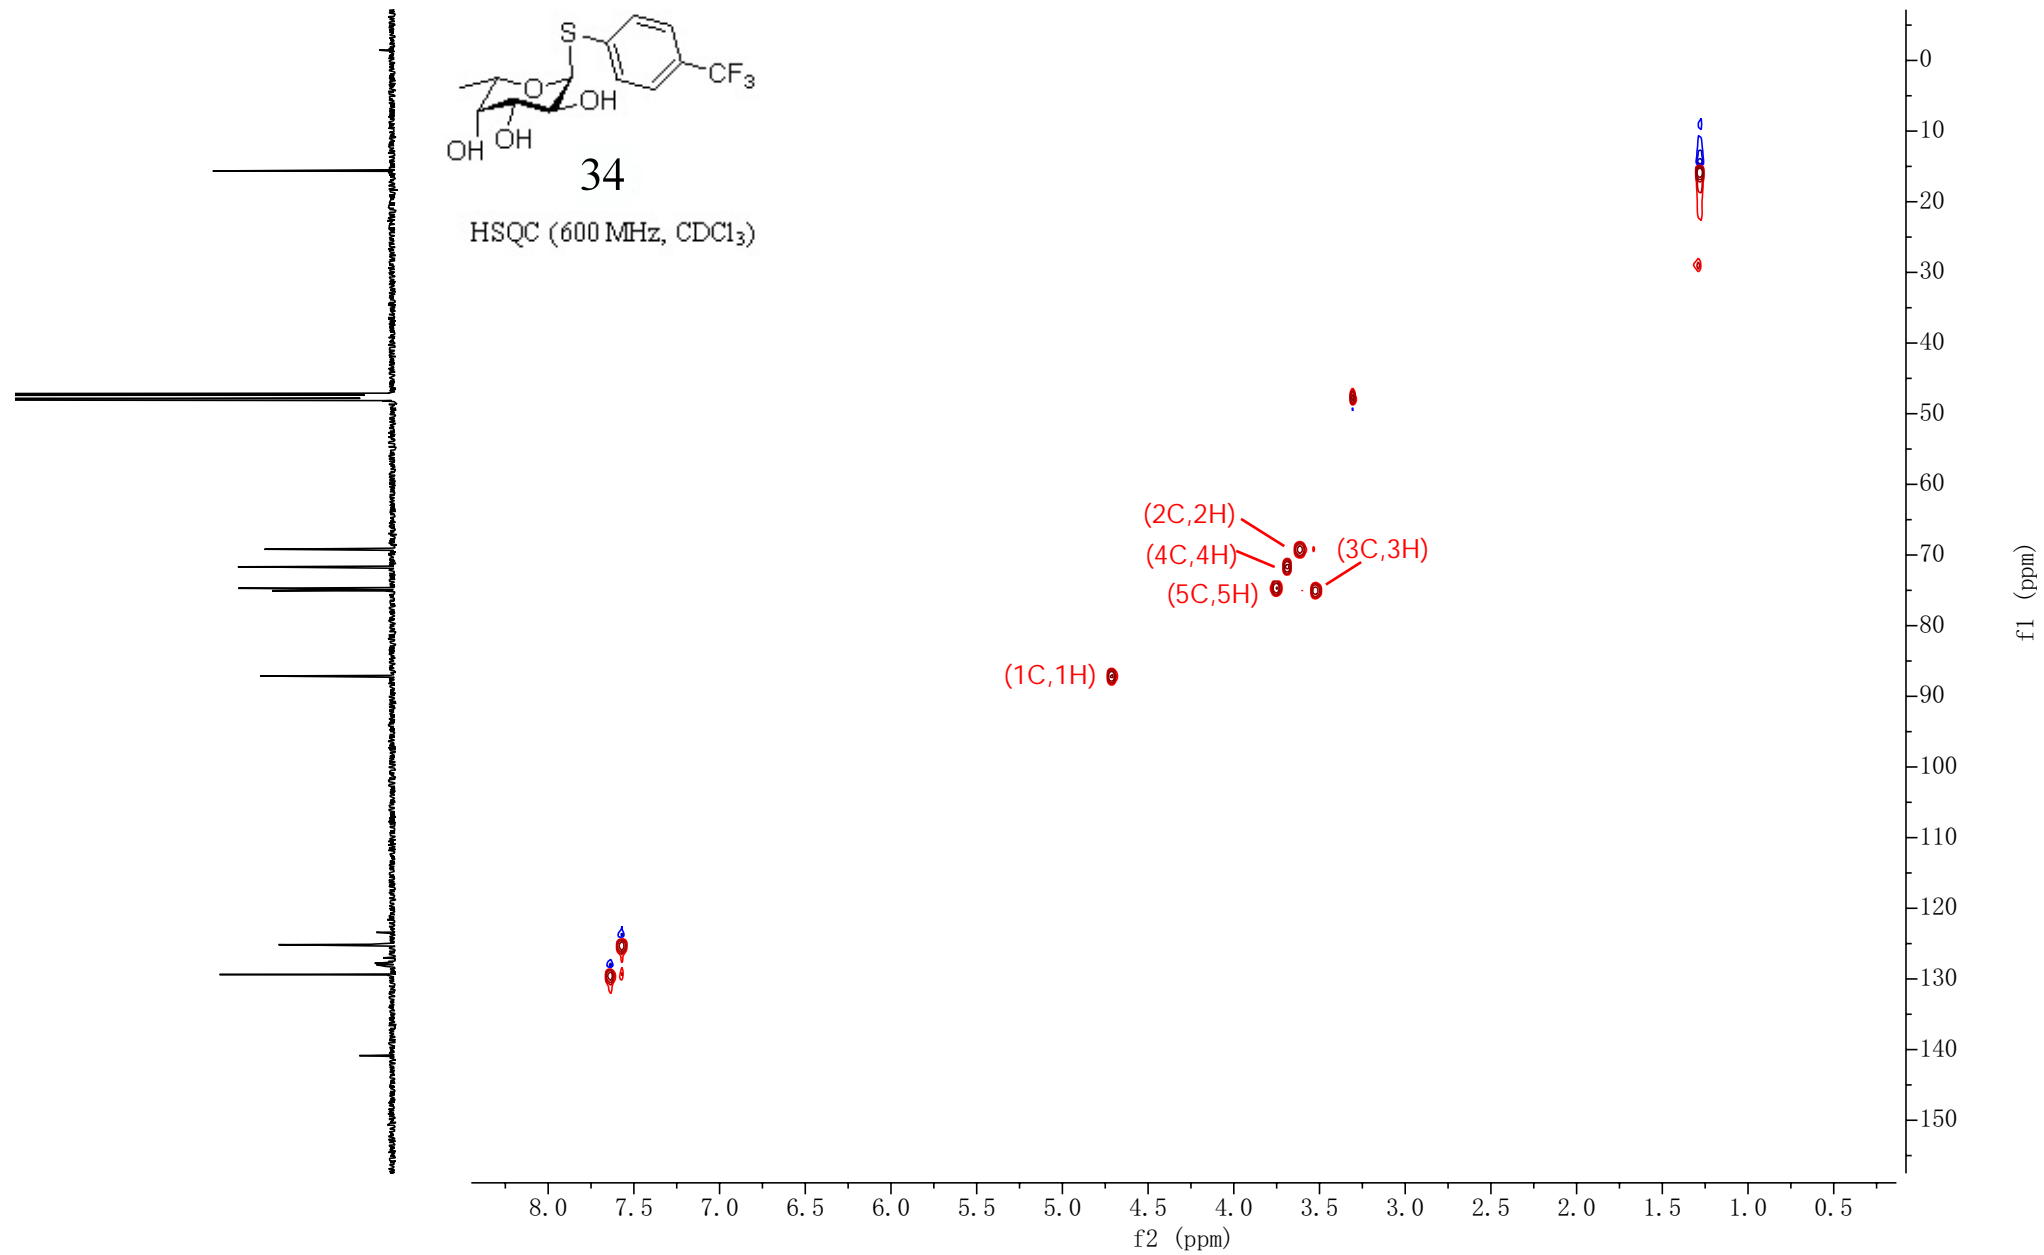

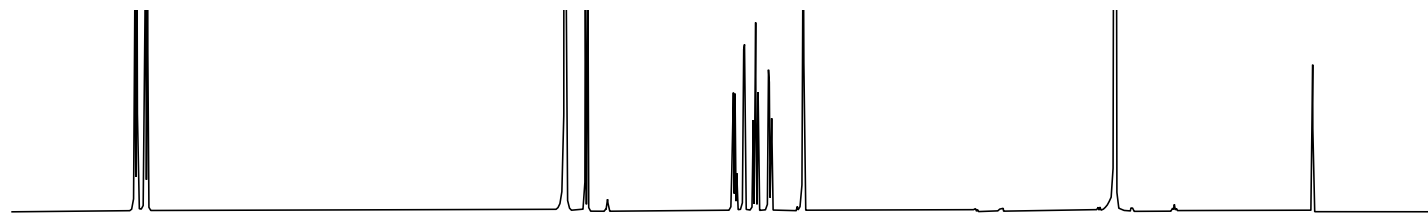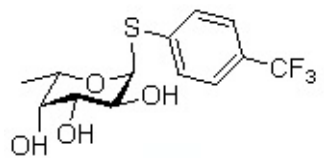

34

HMBC (600 MHz, CDCl<sub>3</sub>)

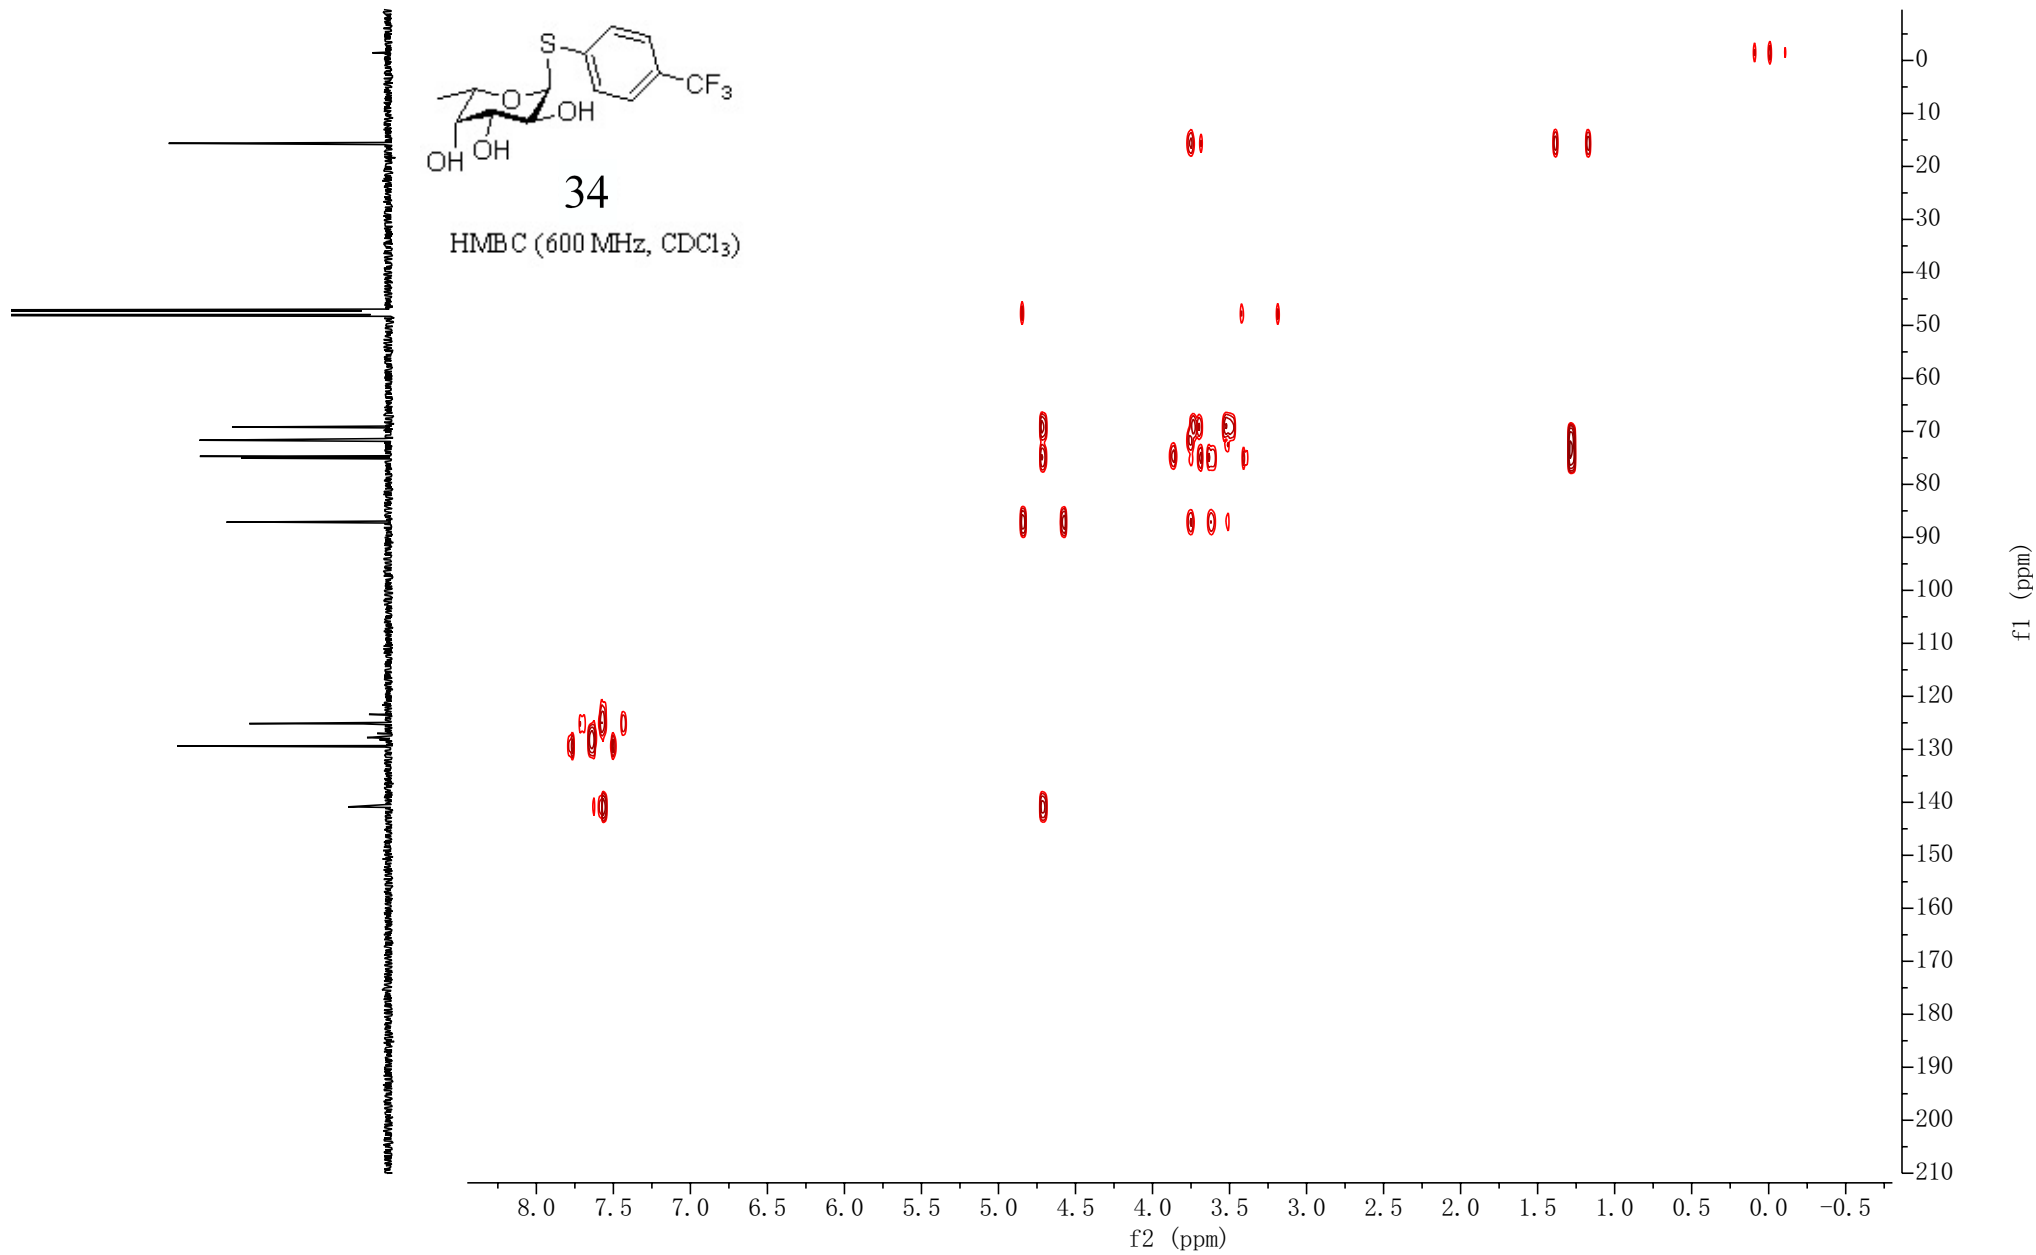

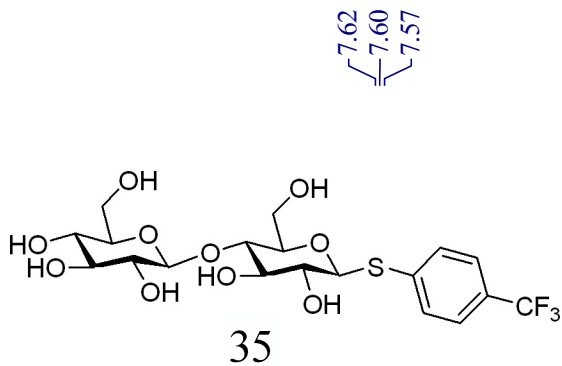

<sup>1</sup>H NMR (400 MHz, CDCl<sub>3</sub>)

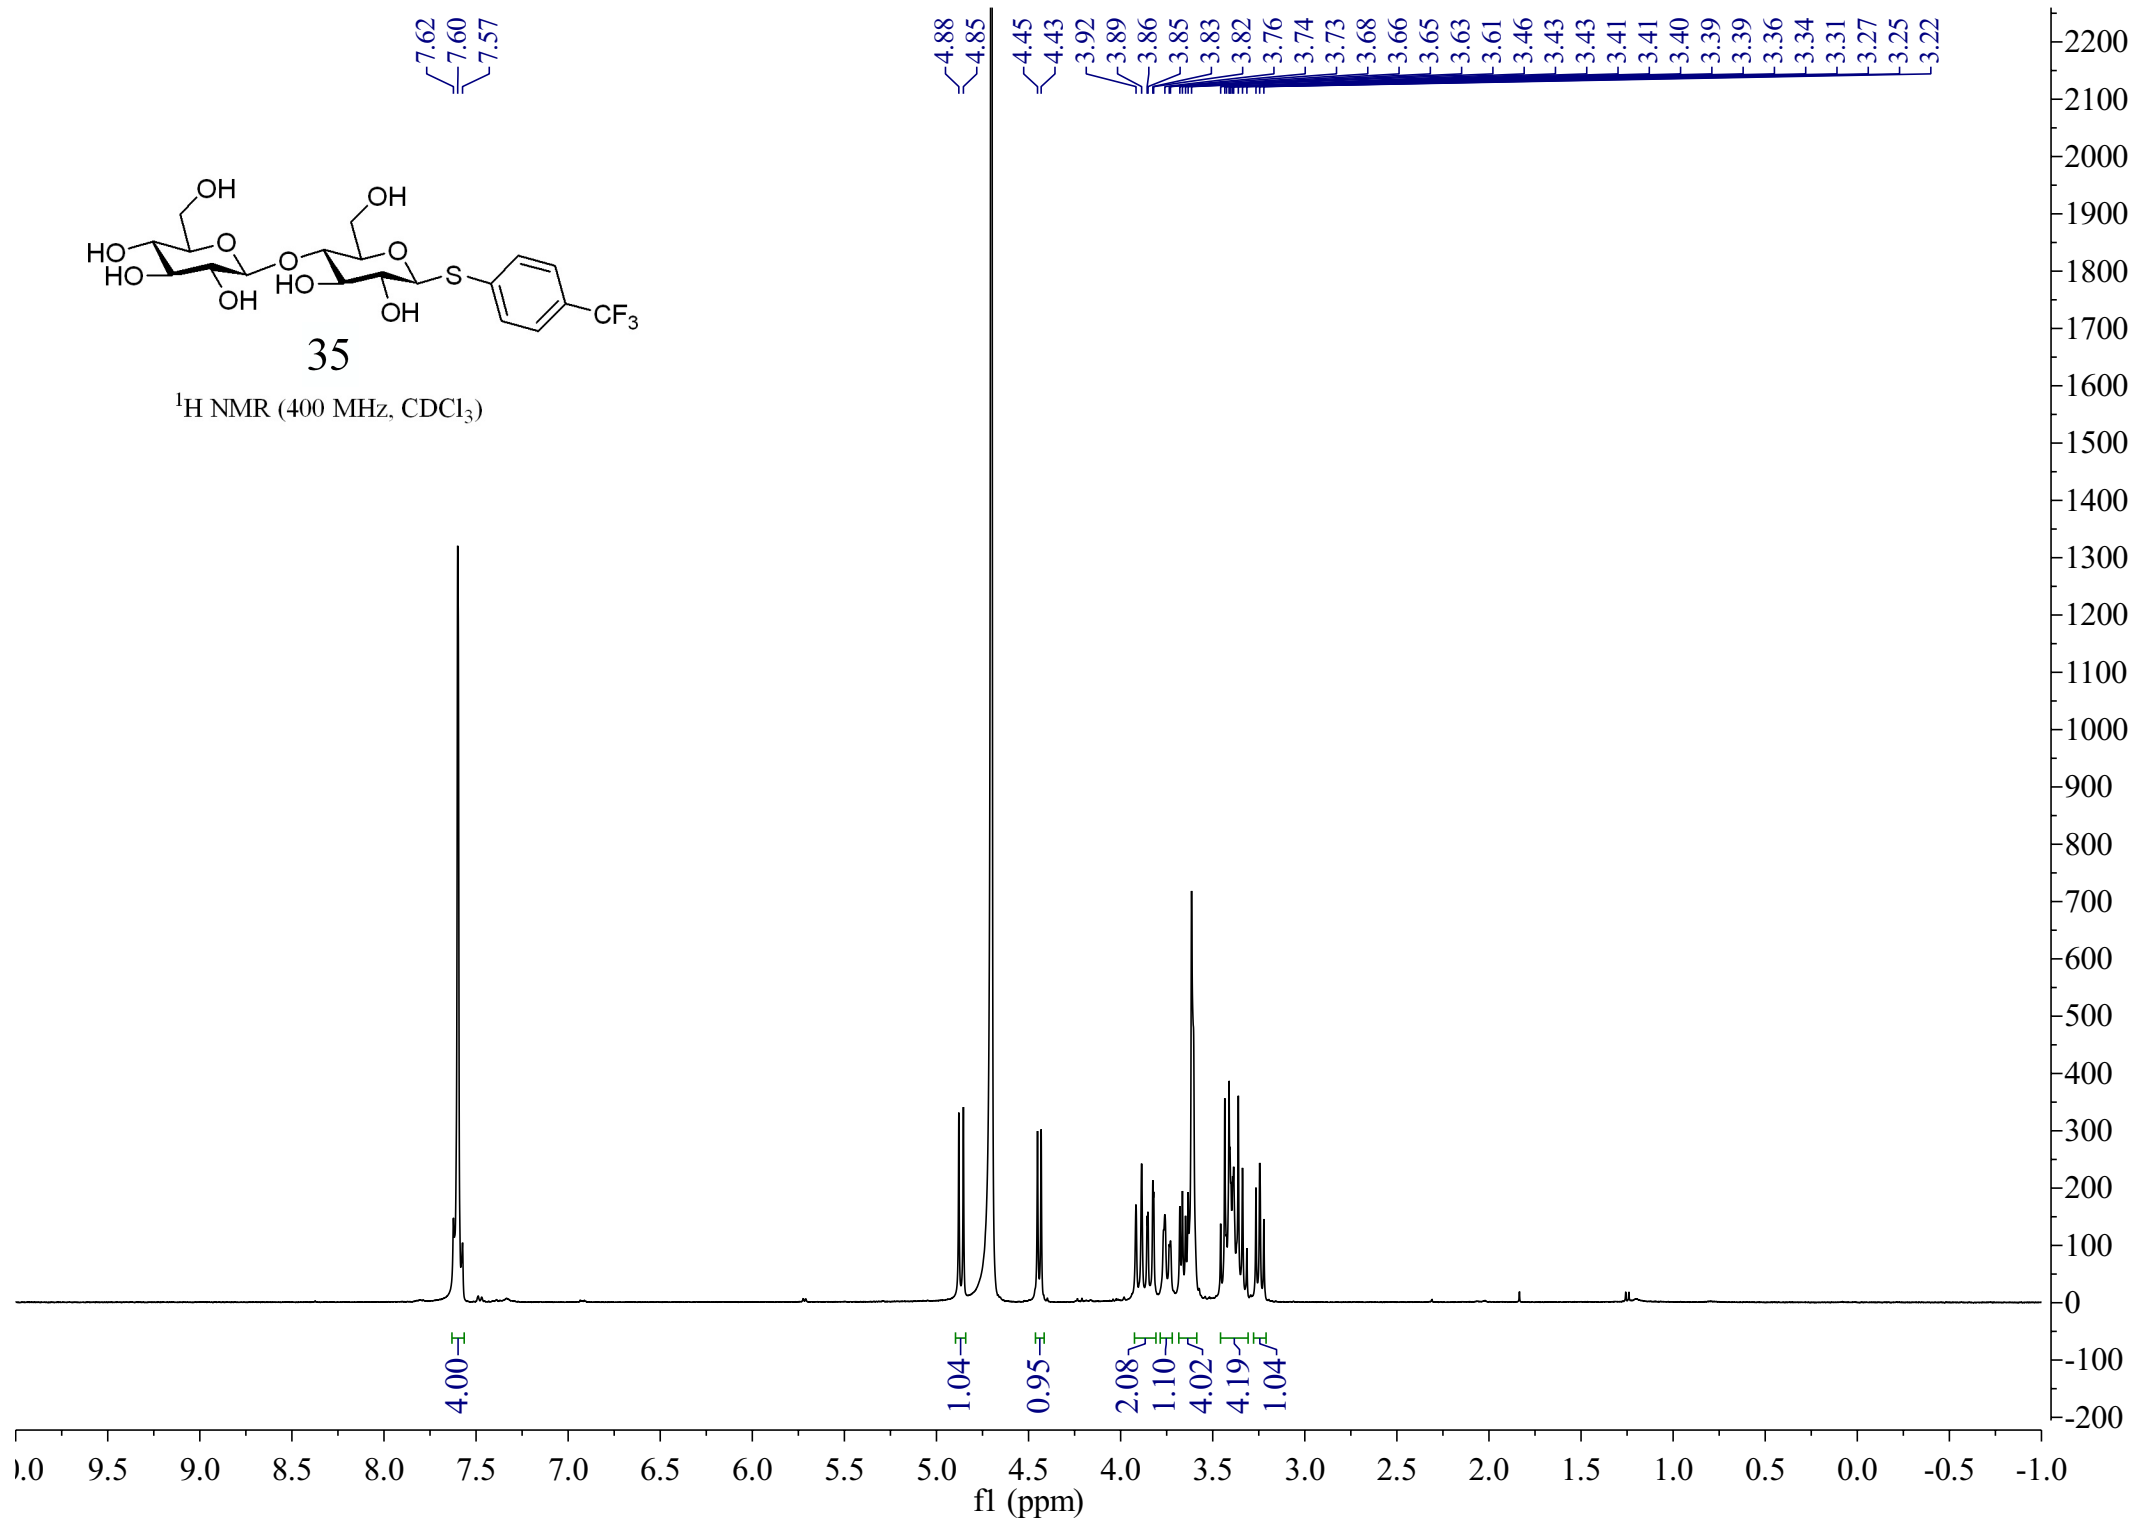

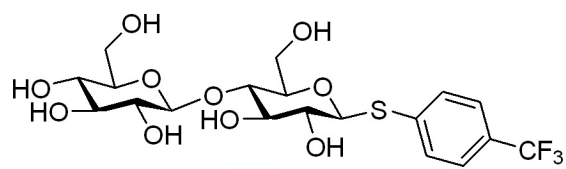

35

$^{13}\text{C}\{^1\text{H}\}$  NMR (100 MHz,  $\text{CDCl}_3$ )

- 137.77
- 130.34
- 125.96
- 125.92
- 125.43
- 122.73
- 102.53
- 102.46
- 100.00
- 86.30
- 78.16
- 76.00
- 75.50
- 73.15
- 71.51
- 68.45
- 60.59
- 60.05

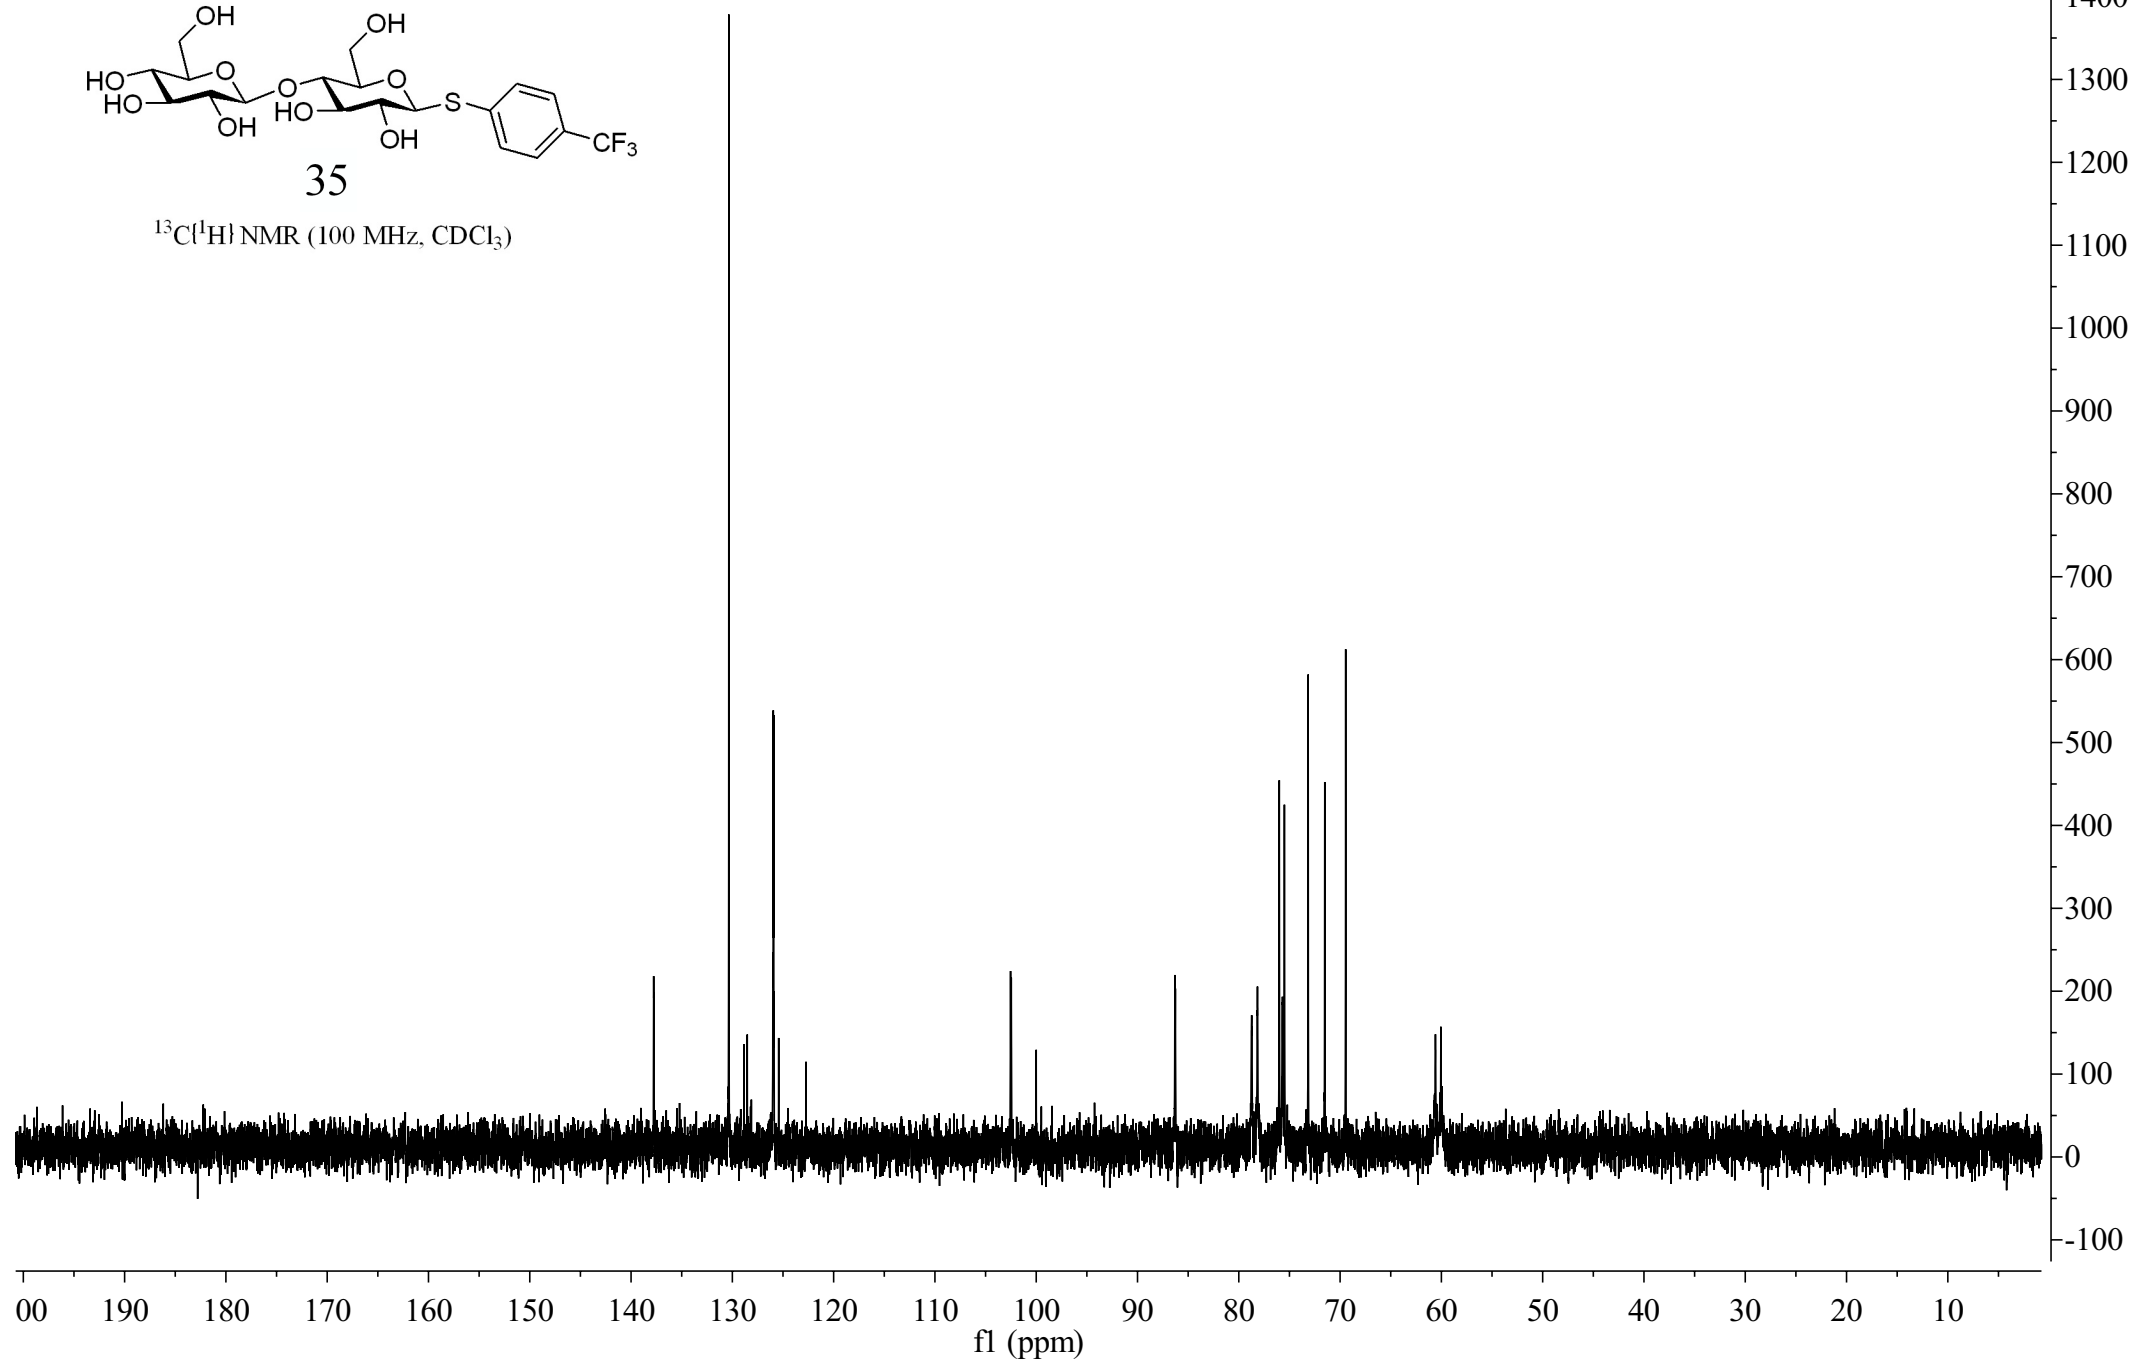

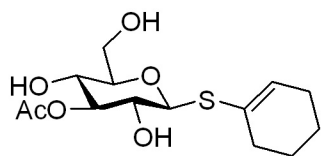

36

$^1\text{H}$  NMR (400 MHz,  $\text{CDCl}_3$ )

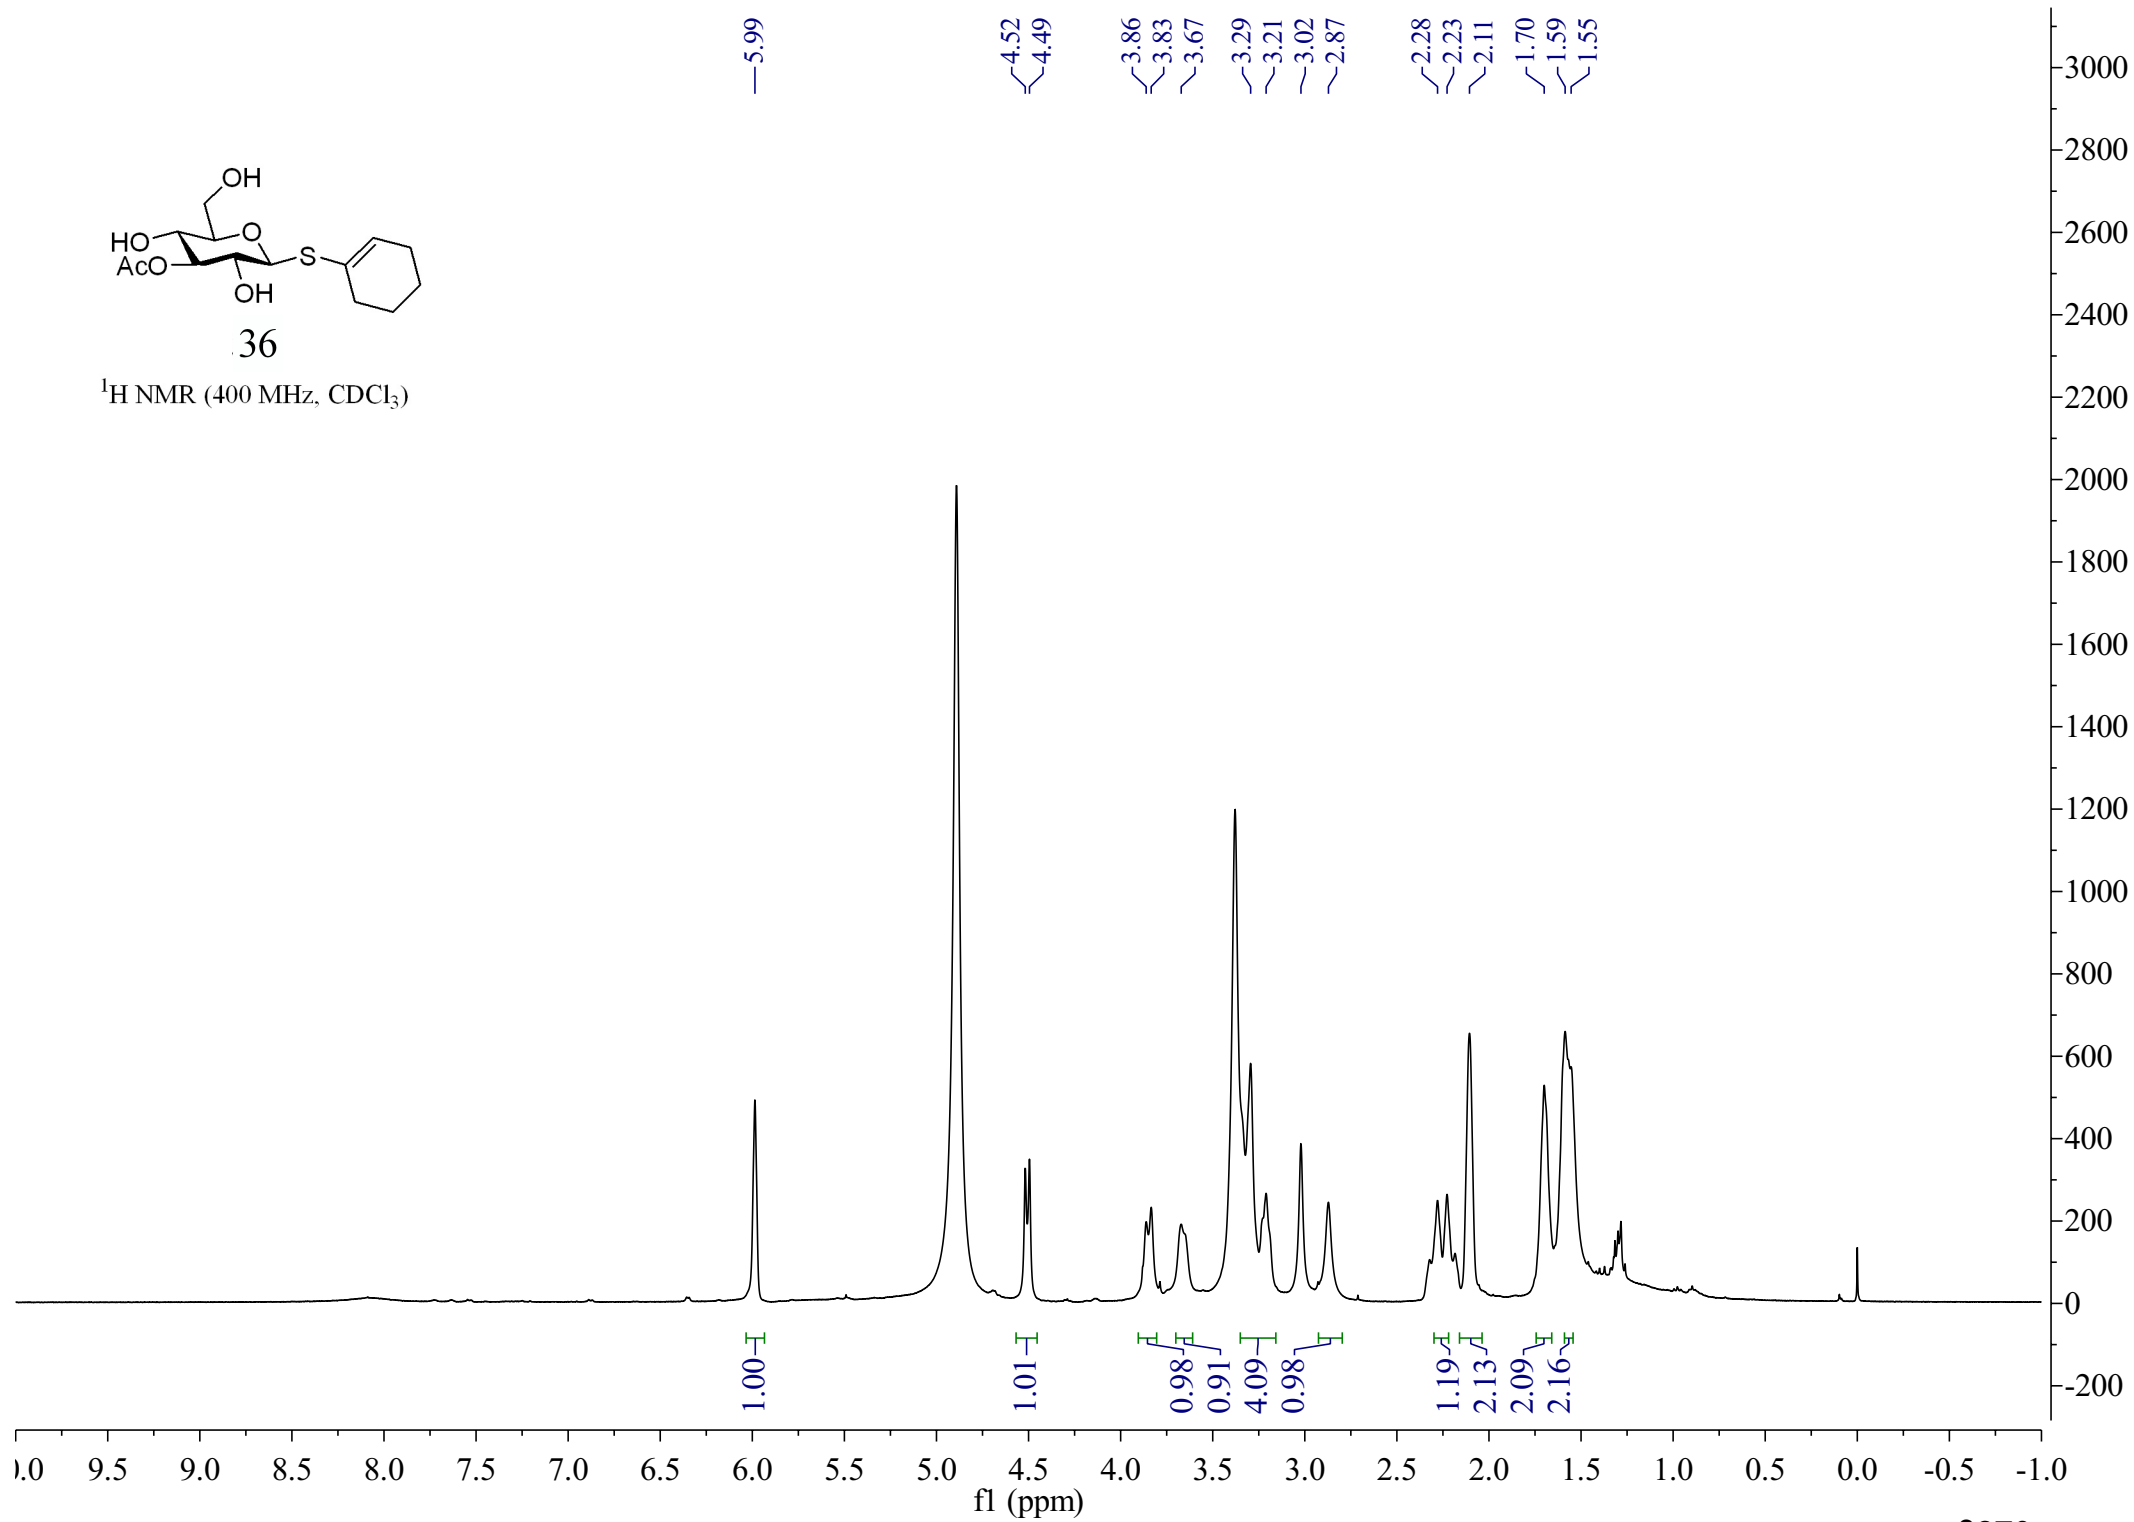

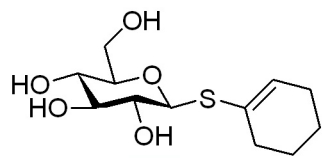

36

$^{13}\text{C}\{^1\text{H}\}$  NMR (100 MHz,  $\text{CDCl}_3$ )

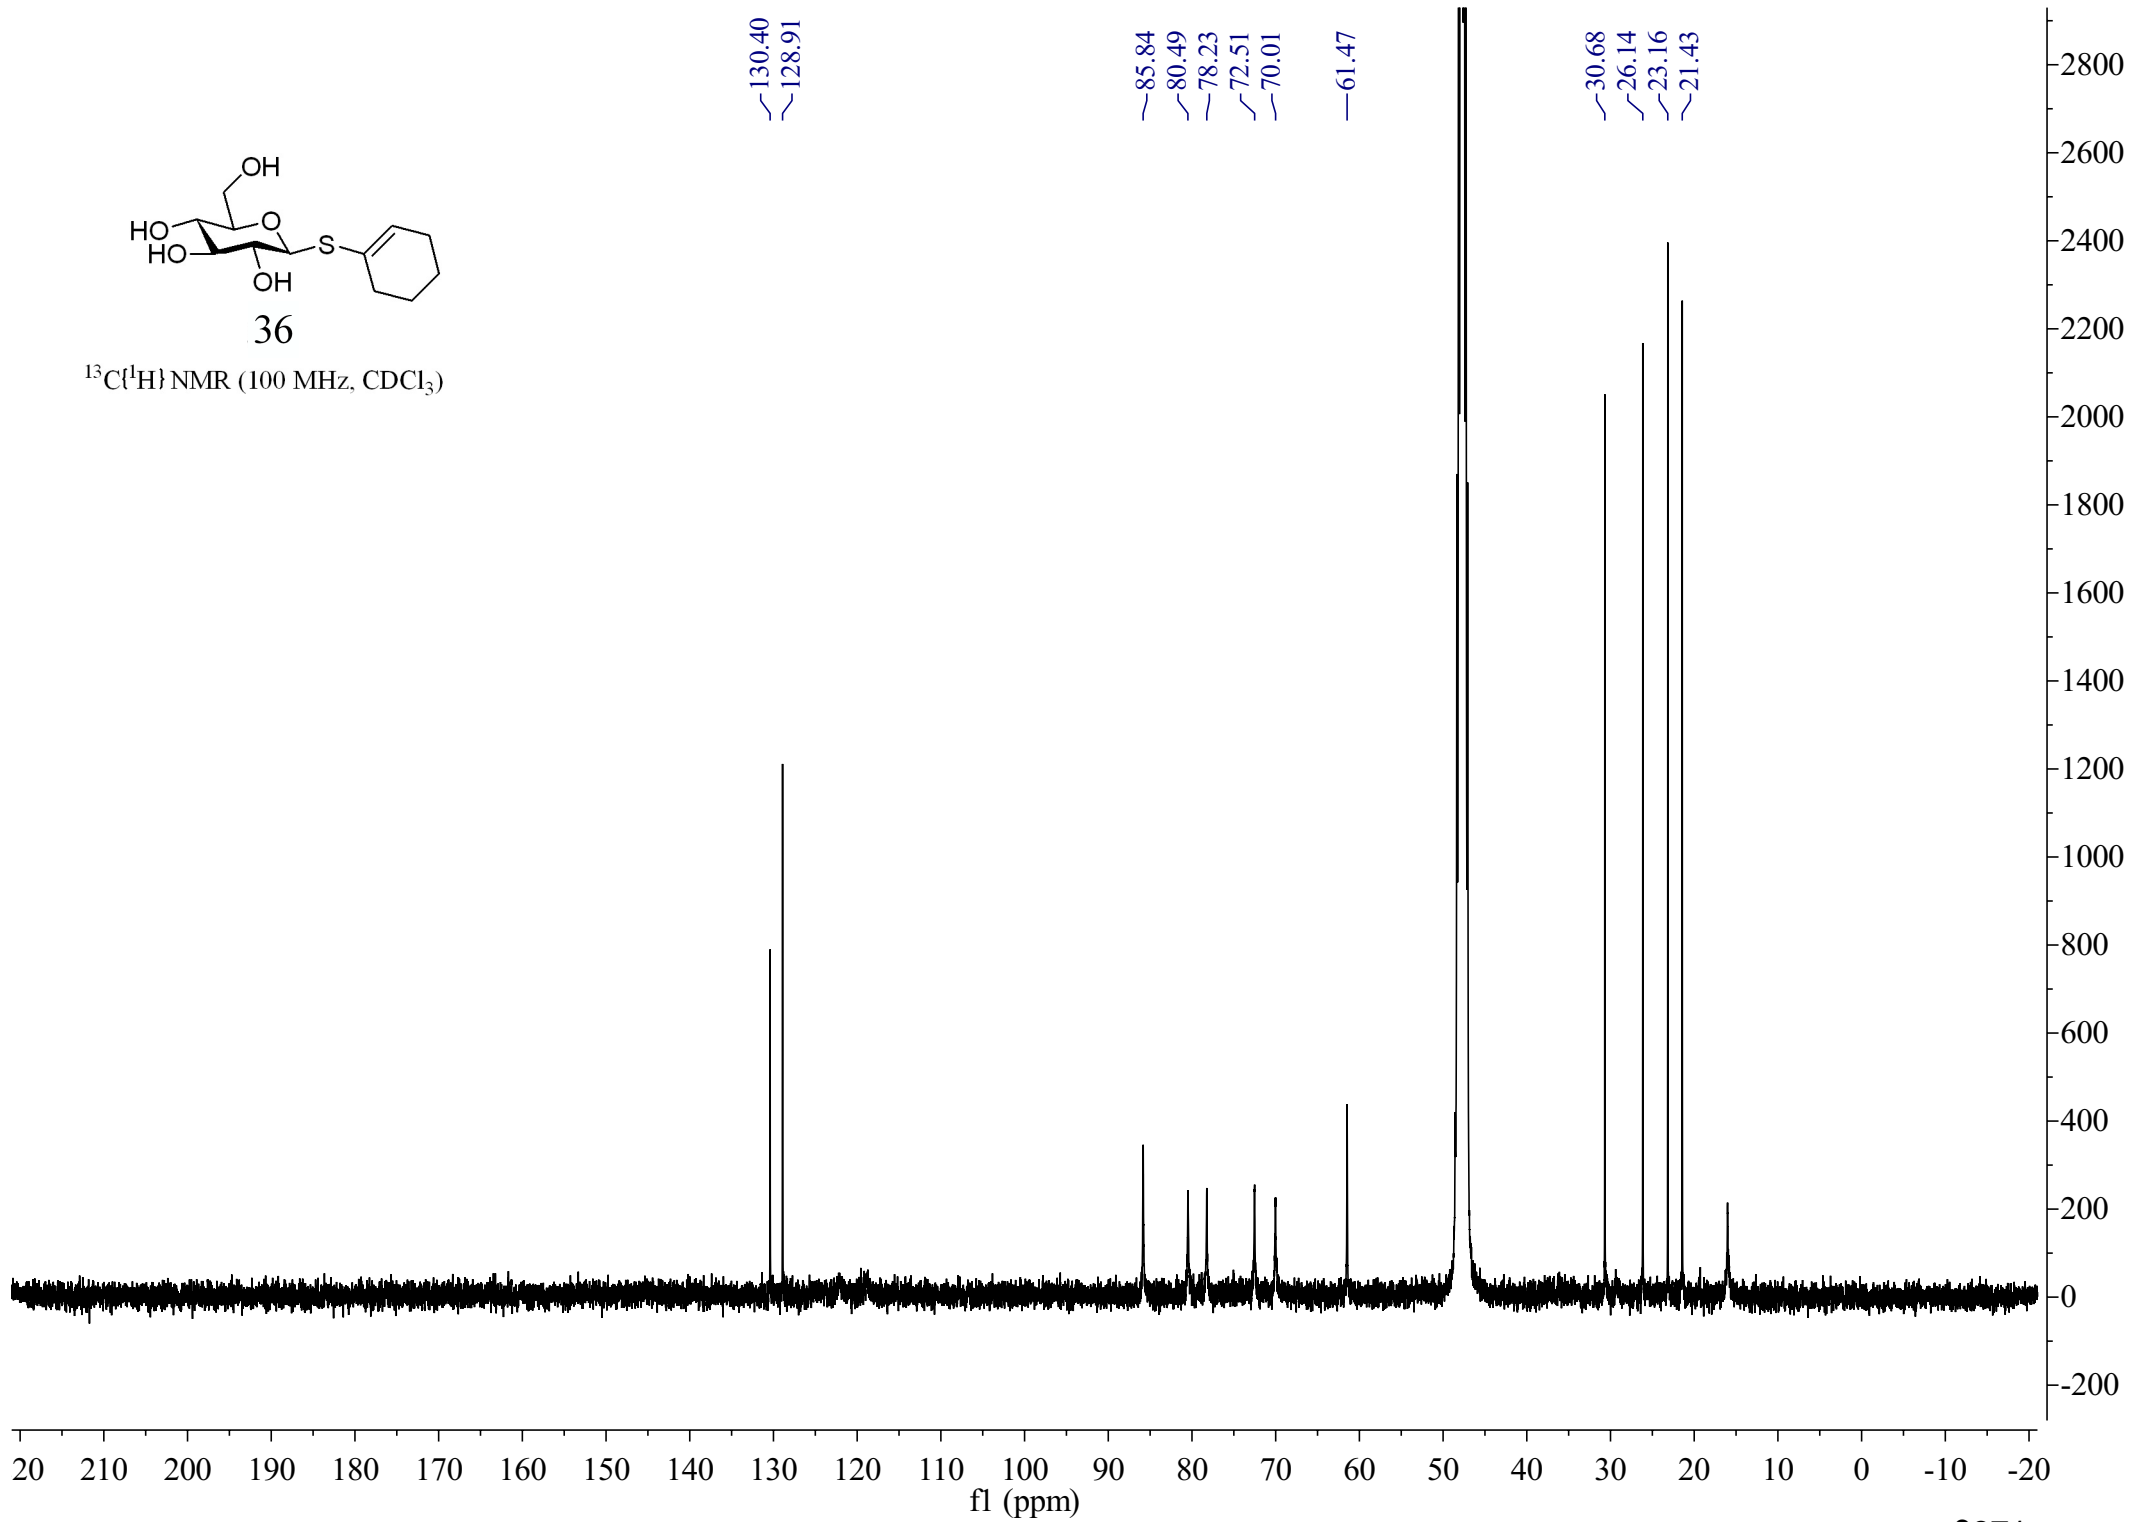

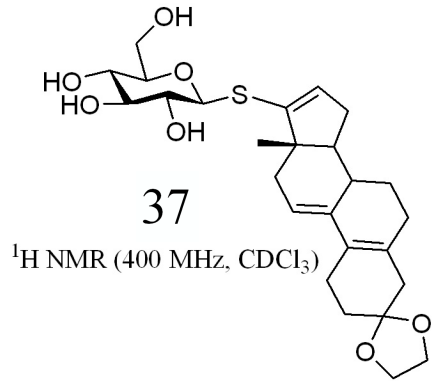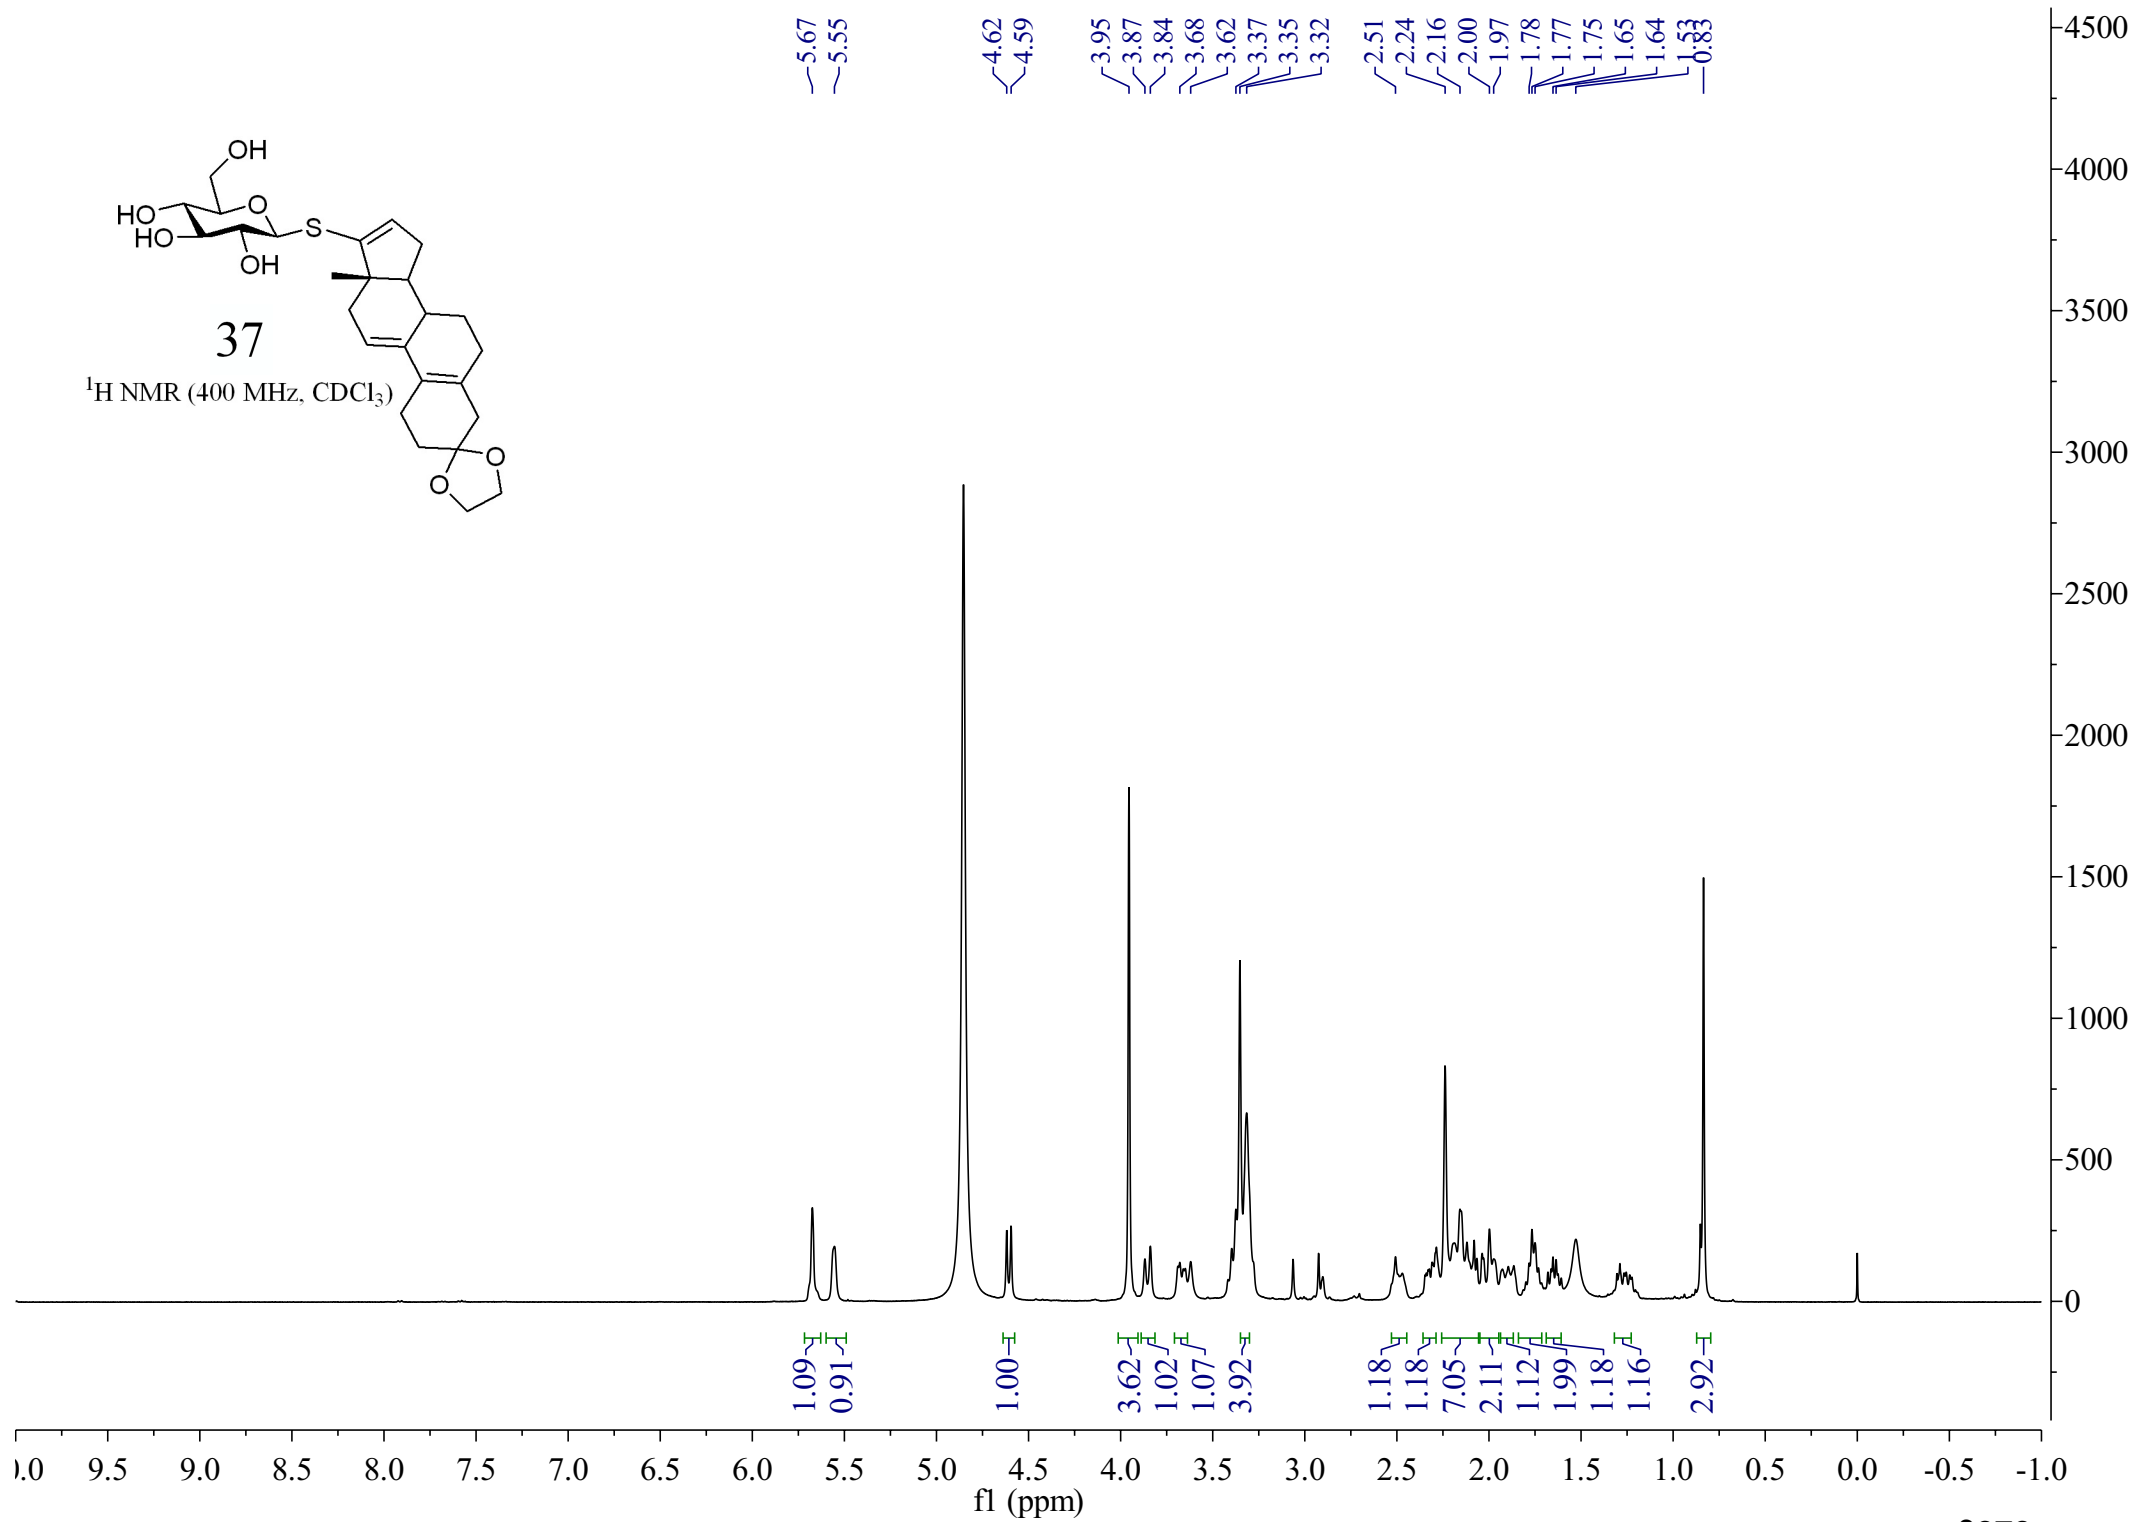

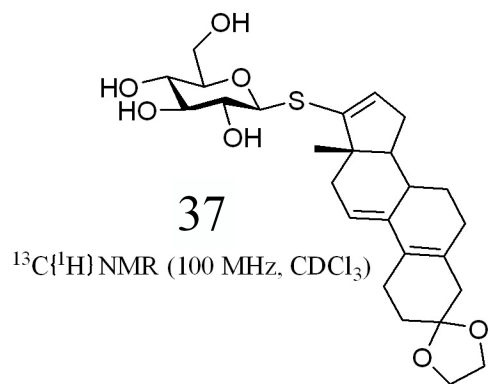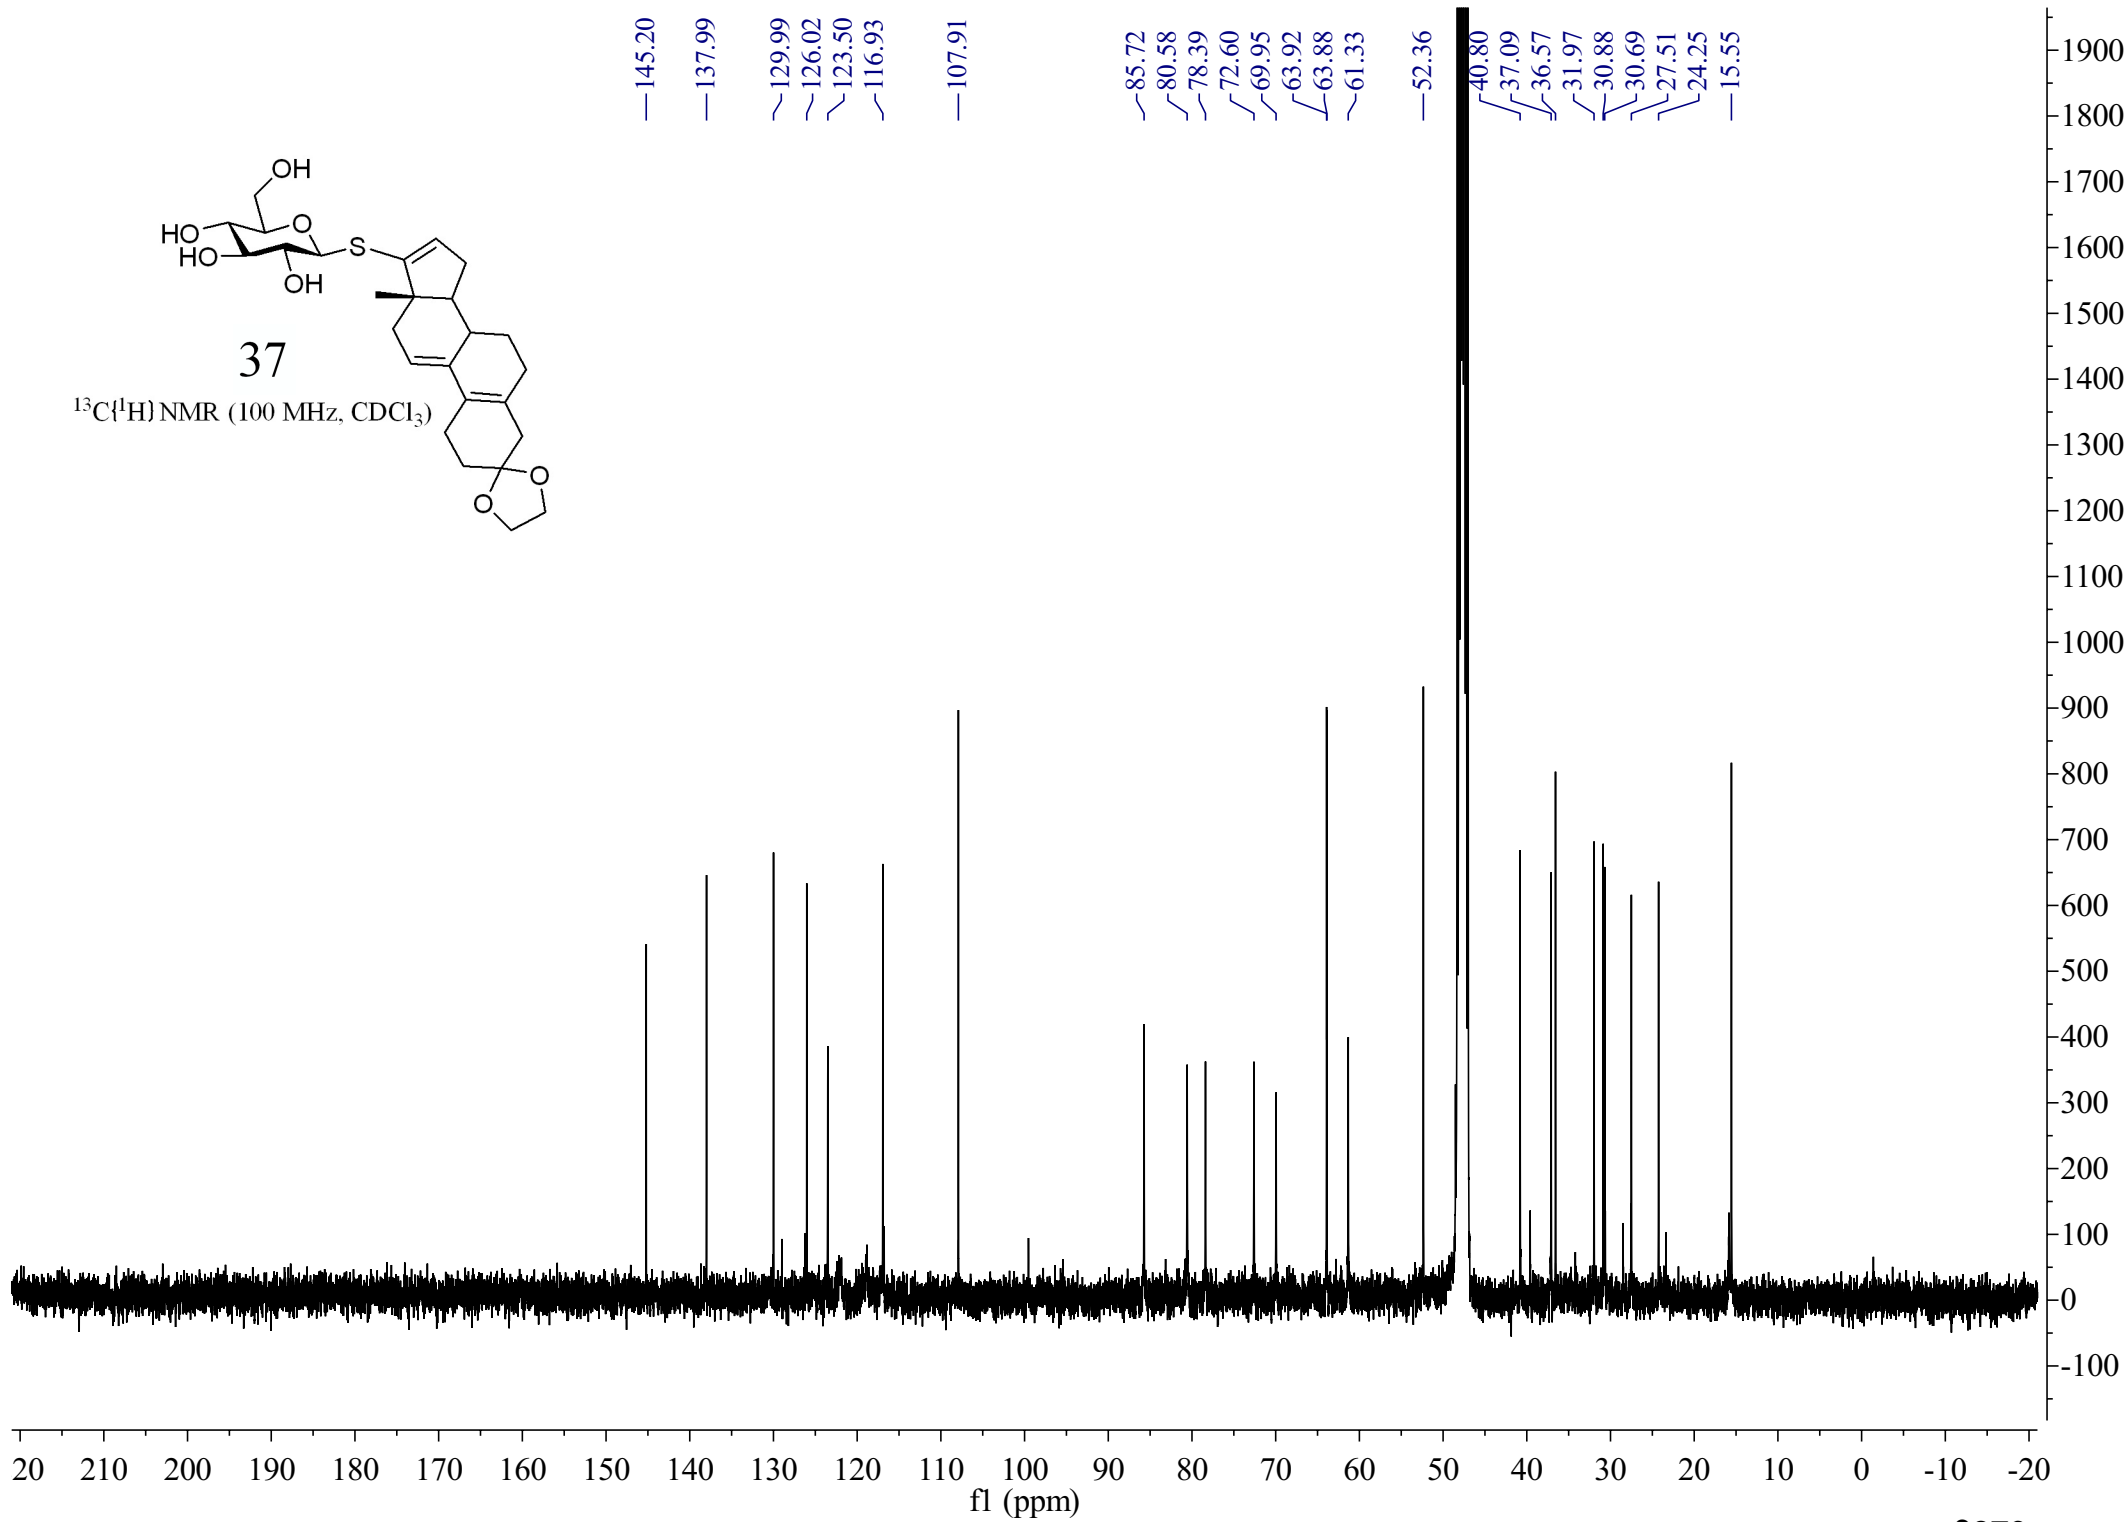



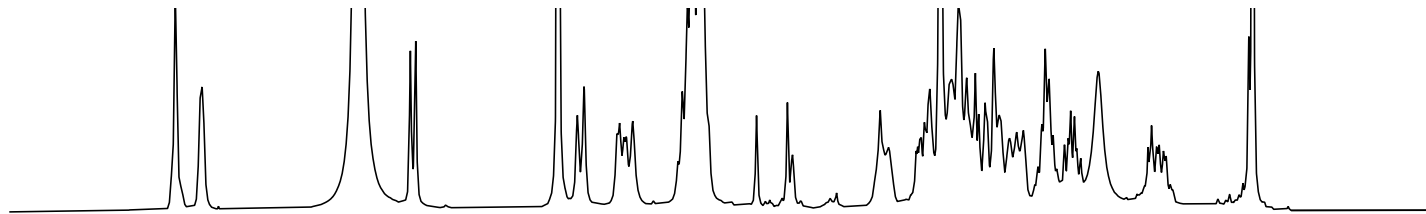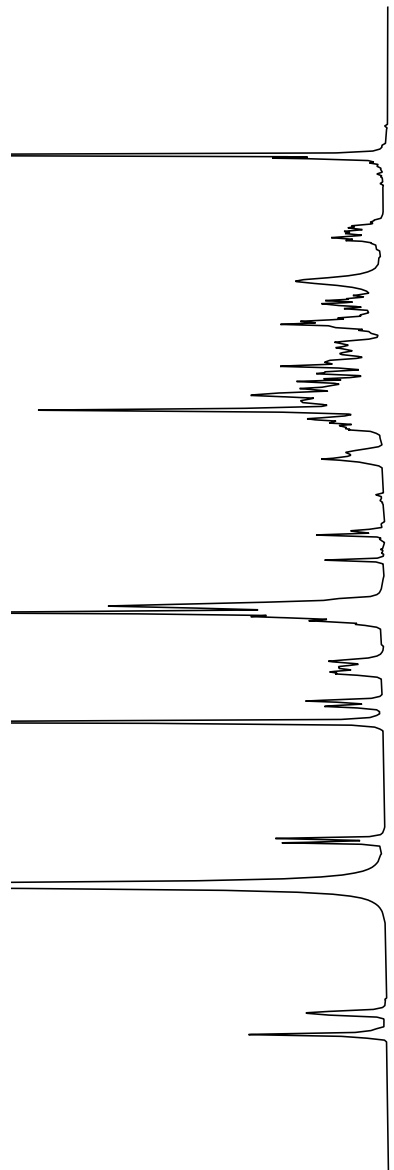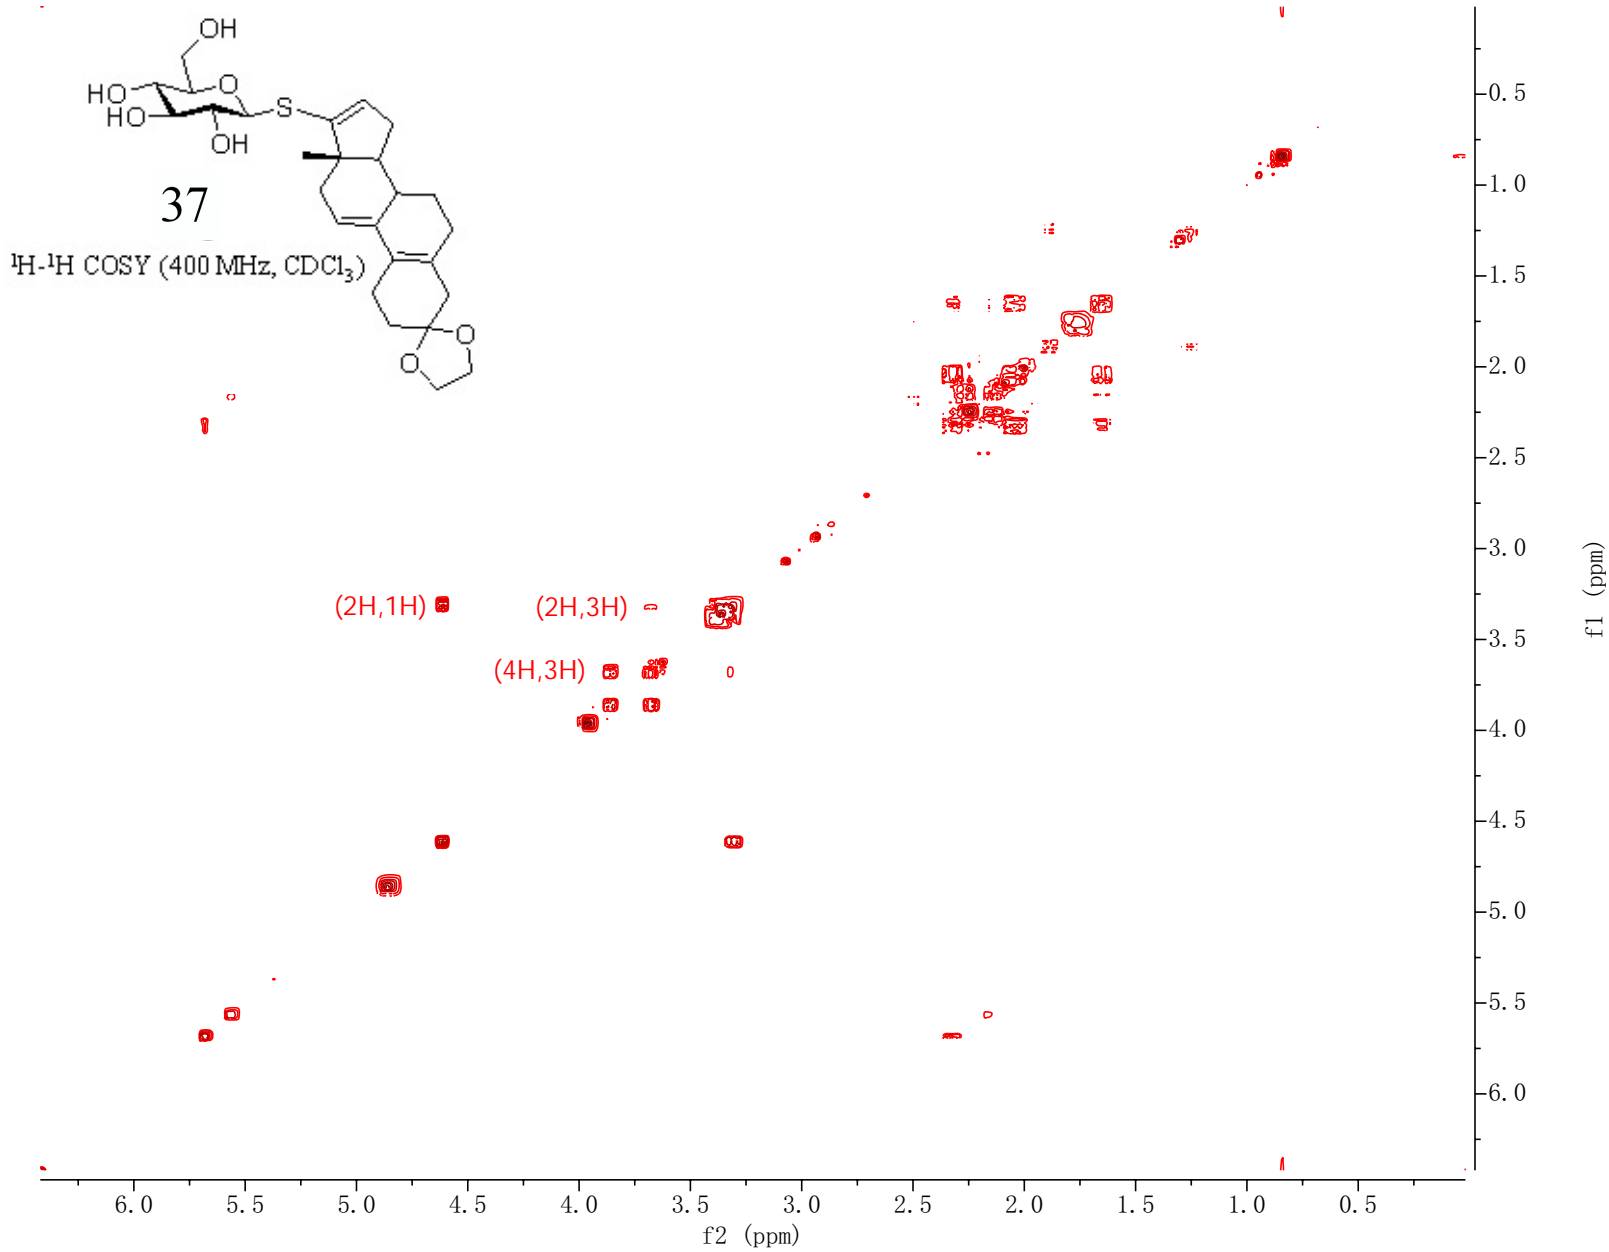

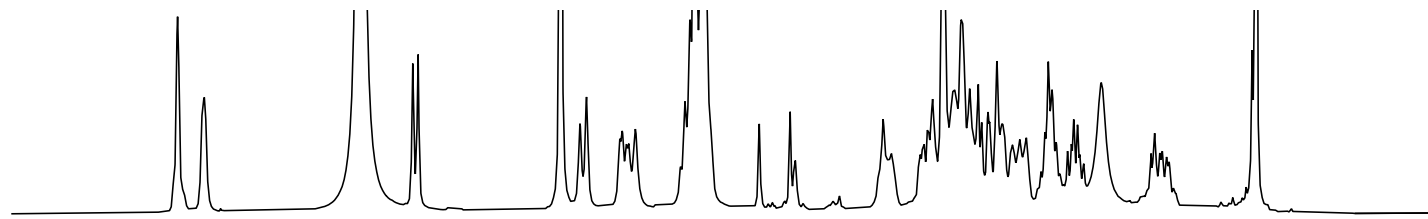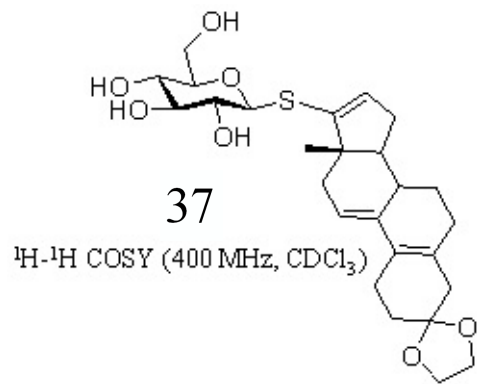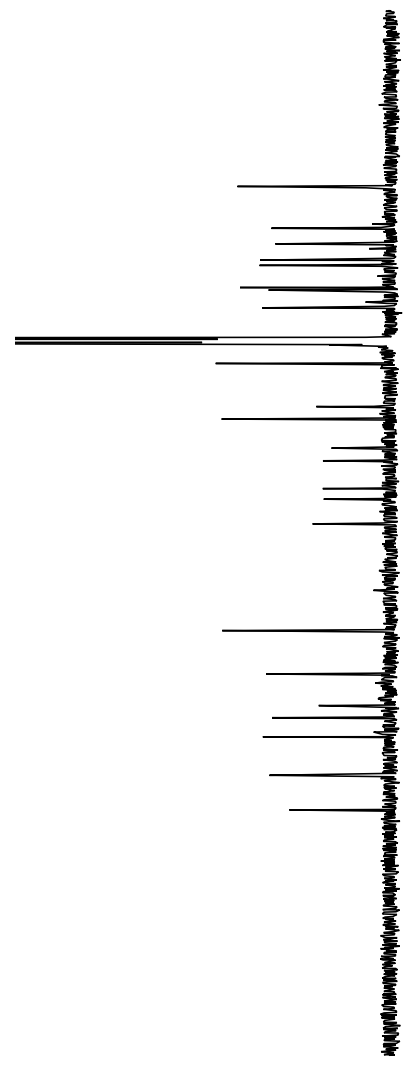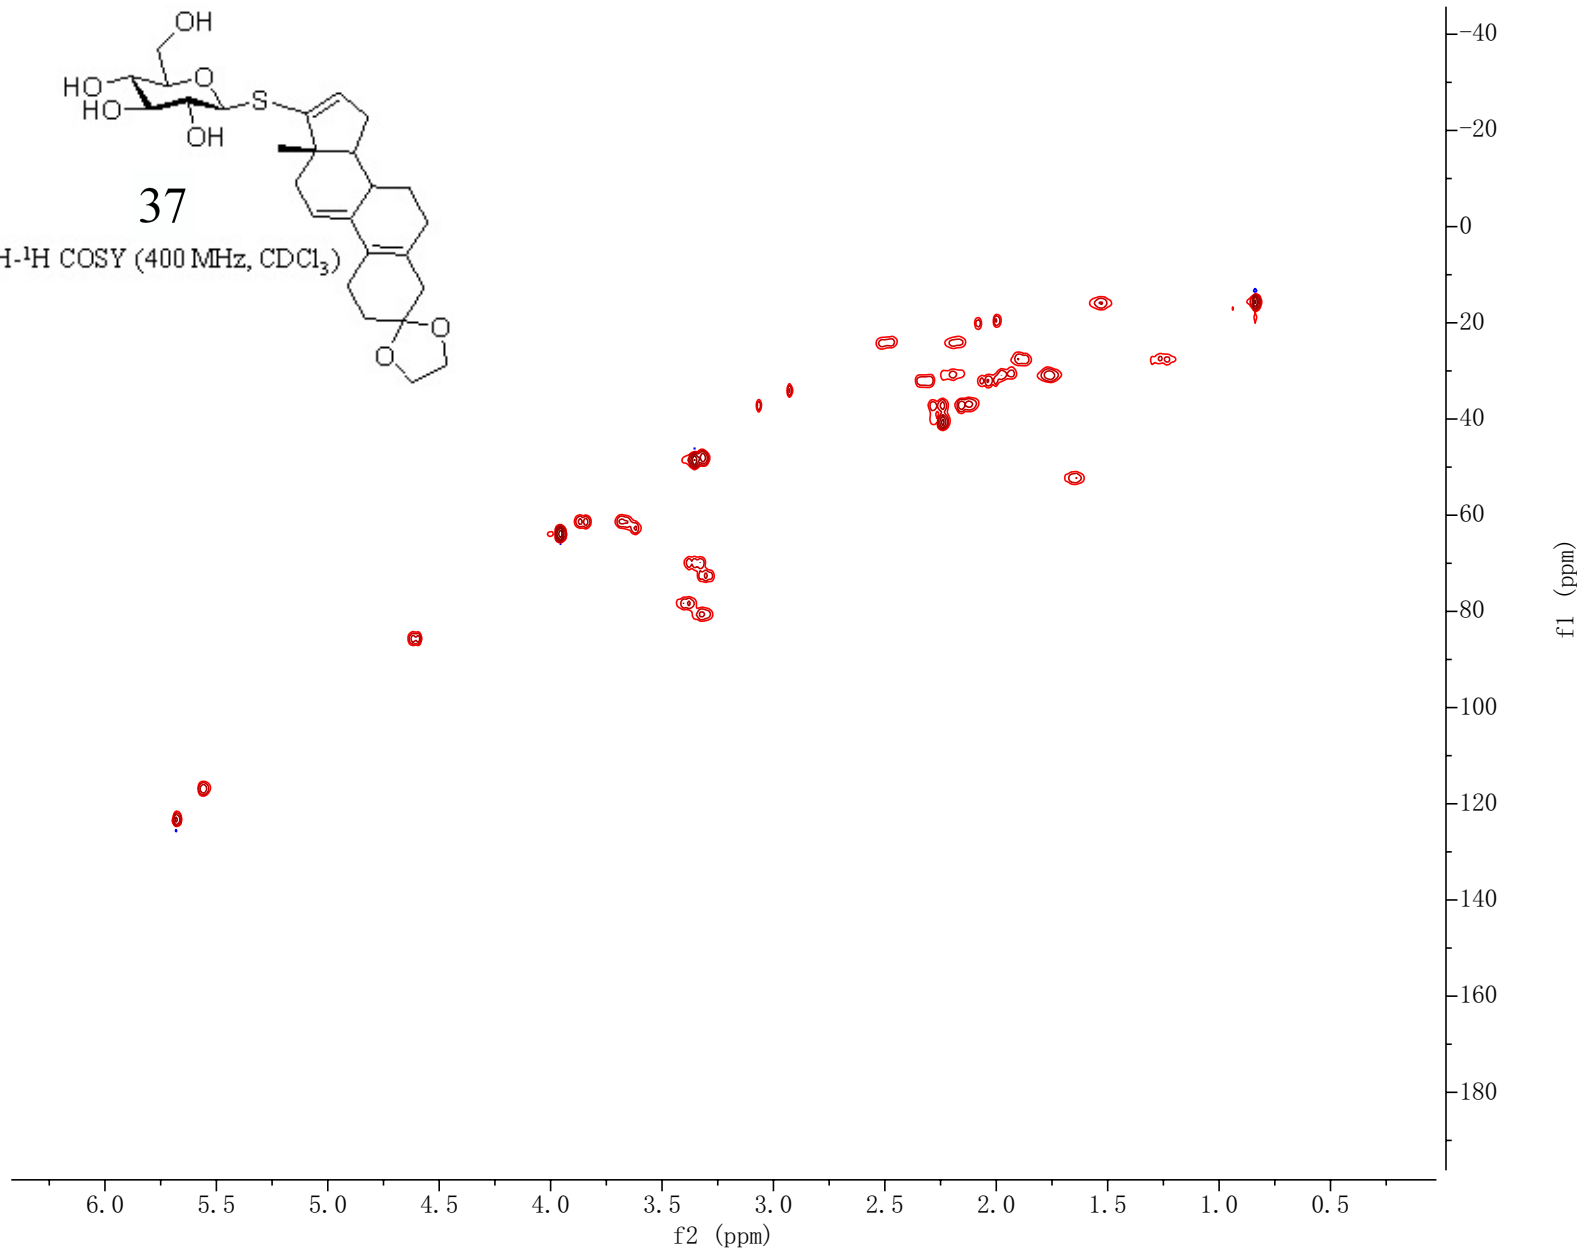

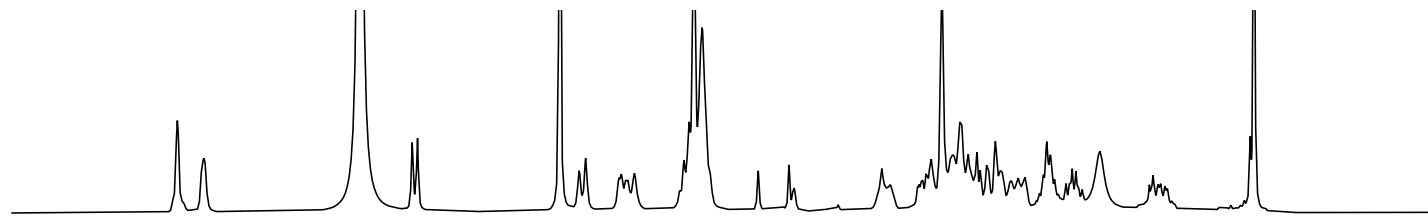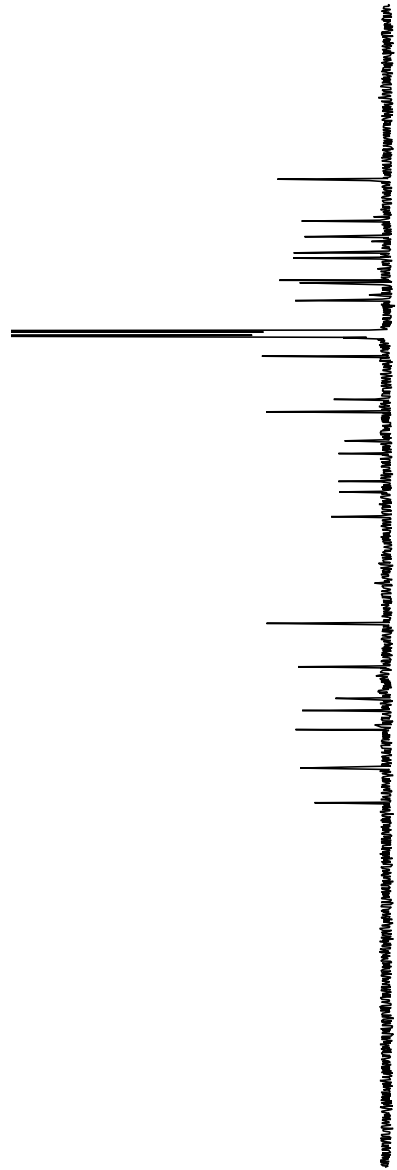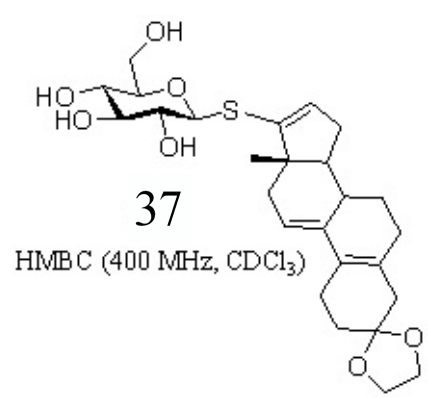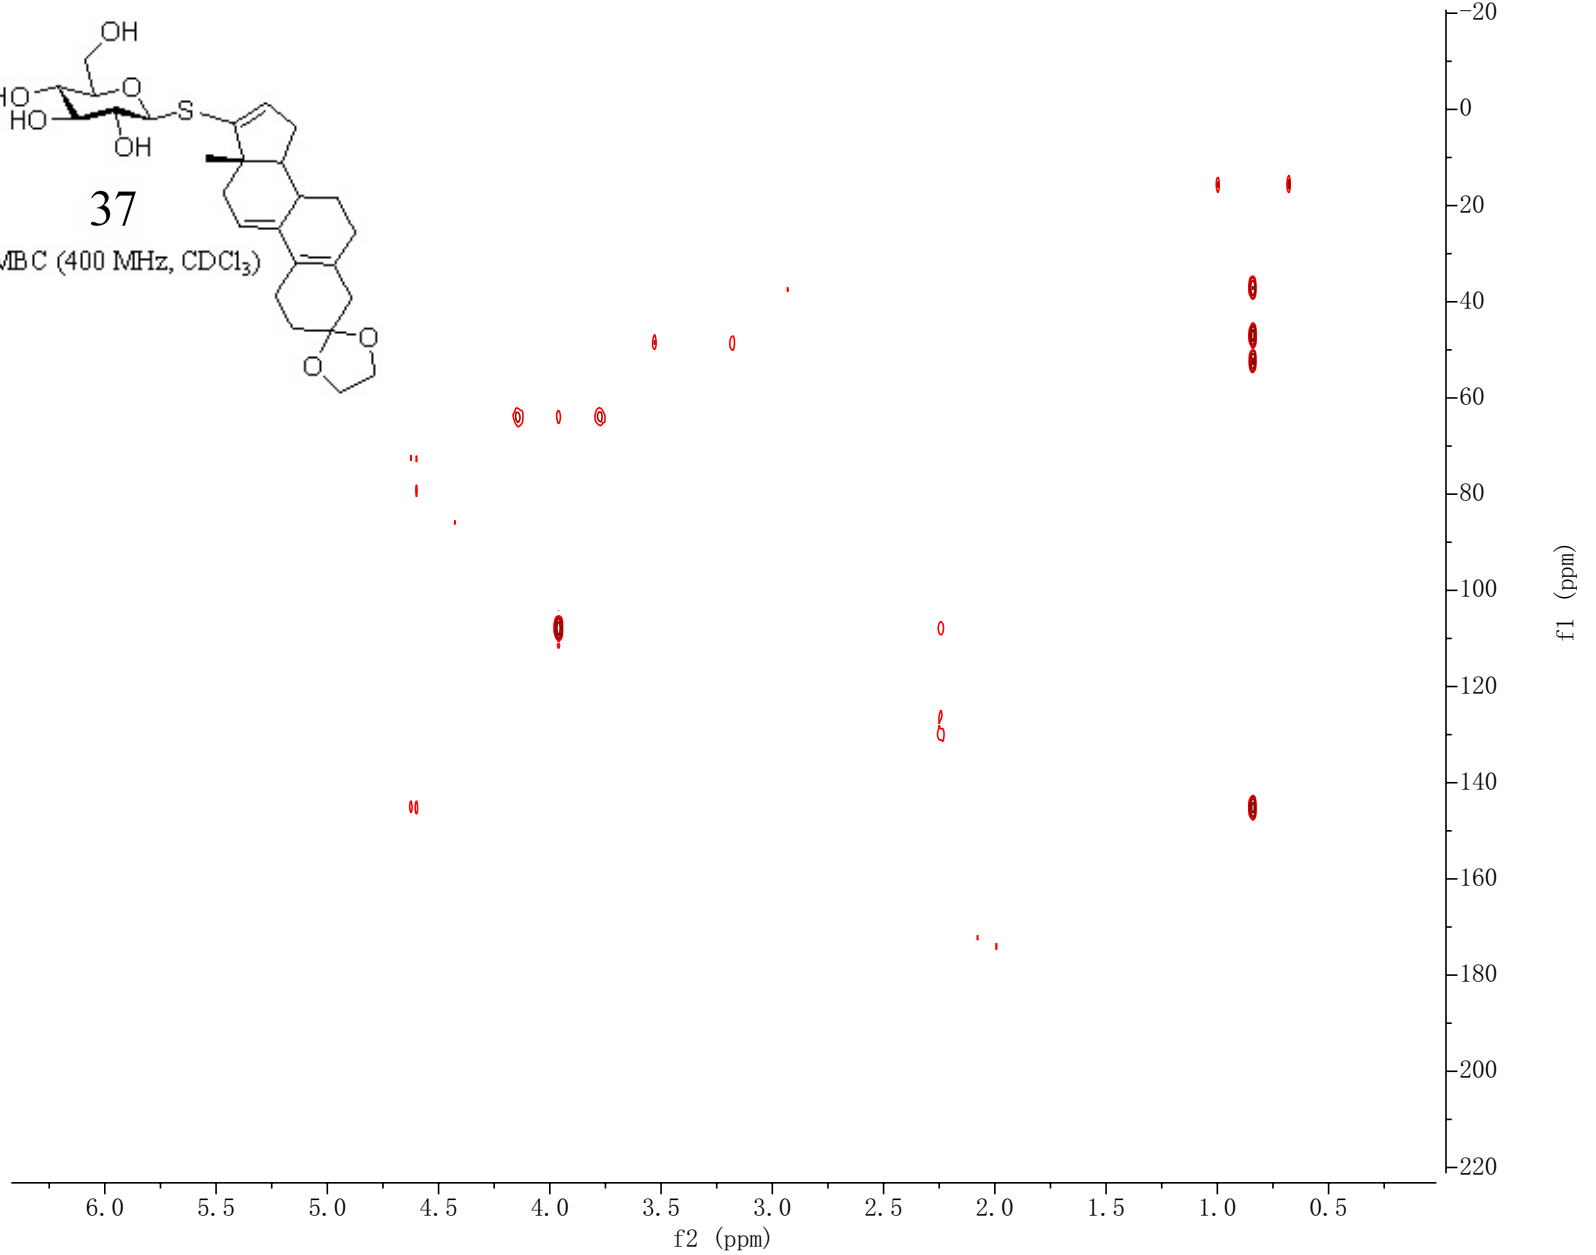

Supplement: d4ob00442f2.pdf [file d4ob00442f2.pdf]
